# Supplementary material for: Salmonella enterica Serovar Typhimurium SPI-1 and SPI-2 Shape the Global Transcriptional Landscape in a Human Intestinal Organoid Model System
Source: PubMed Central journal article supplement (PMC8262845; doi:10.1128/mbio.00399-21), 2021-05-18
Supplement: mbio.00399-21-st001.pdf [file mbio.00399-21-st001.pdf]

**Table S1: Significant genes 2.5h pi**

| Symbol   | STM                            |           | T3SS-1 <sup>mut</sup>          |          | T3SS-2 <sup>mut</sup>          |           |
|----------|--------------------------------|-----------|--------------------------------|----------|--------------------------------|-----------|
|          | log <sub>2</sub> (fold change) | p-value   | log <sub>2</sub> (fold change) | p-value  | log <sub>2</sub> (fold change) | p-value   |
| CXCL2    | 6.615801663                    | 9.63E-103 | 5.995814411                    | 1.05E-84 | 6.833470917                    | 1.65E-109 |
| NFKBIZ   | 2.283908472                    | 3.39E-74  | 2.060864042                    | 9.56E-61 | 2.564145149                    | 3.71E-93  |
| CXCL1    | 6.194937458                    | 4.87E-73  | 5.947029859                    | 1.86E-67 | 6.548721662                    | 2.10E-81  |
| NFKBIA   | 3.975903931                    | 4.06E-73  | 3.691413604                    | 2.79E-63 | 4.549870409                    | 3.28E-95  |
| CXCL3    | 5.652319061                    | 1.85E-72  | 4.964988877                    | 2.57E-56 | 5.890110138                    | 1.56E-78  |
| BIRC3    | 5.882106382                    | 1.39E-69  | 5.615398099                    | 1.40E-63 | 6.316795726                    | 5.60E-80  |
| ZC3H12C  | 2.37057614                     | 1.33E-69  | 2.014651477                    | 1.12E-50 | 2.411422919                    | 4.68E-72  |
| ZC3H12A  | 4.20255591                     | 7.84E-65  | 3.655866217                    | 1.79E-49 | 4.325567388                    | 1.33E-68  |
| TNFAIP3  | 5.508226484                    | 4.62E-63  | 5.19153728                     | 3.24E-56 | 5.89952202                     | 4.23E-72  |
| CLUHP3   | 2.471734213                    | 2.45E-61  | 1.913275982                    | 2.91E-37 | 2.305551178                    | 1.51E-53  |
| CCL20    | 6.71265219                     | 1.91E-55  | 6.873253041                    | 4.79E-58 | 7.265895735                    | 1.18E-64  |
| CXCL6    | 6.620945383                    | 3.59E-55  | 6.20349225                     | 1.22E-48 | 6.935831804                    | 2.10E-60  |
| REL      | 2.536079009                    | 1.81E-50  | 2.100696003                    | 3.71E-35 | 2.564948913                    | 1.31E-51  |
| RCAN1    | 3.85744704                     | 4.71E-50  | 3.082072188                    | 1.46E-32 | 3.860944076                    | 3.80E-50  |
| C6orf222 | 4.474396198                    | 6.83E-46  | 3.703168651                    | 6.44E-32 | 4.922244067                    | 3.04E-55  |
| SOD2     | 2.881461485                    | 1.44E-45  | 2.840800241                    | 2.39E-44 | 3.222441562                    | 1.48E-56  |
| TNFAIP2  | 4.836014333                    | 2.49E-45  | 4.2455662                      | 2.51E-35 | 4.914563269                    | 9.28E-47  |
| CX3CL1   | 4.760616528                    | 2.21E-44  | 3.946348435                    | 5.77E-31 | 4.561988956                    | 6.78E-41  |
| MAP3K8   | 3.362067202                    | 4.40E-42  | 3.067756941                    | 2.56E-35 | 3.700260588                    | 1.10E-50  |
| CASP10   | 3.165107087                    | 6.64E-42  | 2.392324157                    | 1.37E-24 | 3.107411907                    | 1.89E-40  |
| IKBKE    | 2.043267184                    | 2.71E-41  | 1.569320941                    | 6.97E-25 | 1.968437373                    | 1.86E-38  |
| SDC4     | 3.217873309                    | 8.20E-41  | 2.79016136                     | 4.17E-31 | 3.5233877                      | 1.39E-48  |
| ICAM1    | 6.683670443                    | 2.04E-40  | 6.291701515                    | 5.20E-36 | 6.966666113                    | 9.19E-44  |
| CFLAR    | 1.992214216                    | 4.61E-40  | 1.628968697                    | 2.44E-27 | 2.173792709                    | 2.11E-47  |
| CXCL5    | 5.623953884                    | 7.45E-37  | 5.732039344                    | 3.21E-38 | 5.852963844                    | 8.92E-40  |
| CDC42EP2 | 2.022097185                    | 2.53E-36  | 1.449846451                    | 2.09E-19 | 1.915532294                    | 8.53E-33  |
| KLF6     | 2.101878825                    | 2.52E-36  | 1.554964177                    | 1.32E-20 | 2.167242559                    | 1.53E-38  |
| TIFA     | 2.977773533                    | 3.42E-35  | 2.840566232                    | 3.51E-32 | 3.296629563                    | 7.67E-43  |
| IL8      | 7.015250208                    | 6.81E-34  | 6.765743631                    | 1.21E-31 | 7.690652387                    | 2.18E-40  |
| NCOA7    | 2.775844734                    | 5.66E-33  | 2.329936754                    | 1.05E-23 | 3.162515264                    | 2.47E-42  |
| NFKB2    | 3.049506011                    | 7.28E-33  | 2.43469427                     | 1.61E-21 | 2.967445084                    | 3.24E-31  |
| ANKRD33B | 5.243636897                    | 1.96E-32  | 4.352997538                    | 1.07E-22 | 4.66275499                     | 7.48E-26  |
| ABTB2    | 3.910688729                    | 8.62E-31  | 3.423552396                    | 5.83E-24 | 3.678602462                    | 2.00E-27  |
| MAFF     | 3.069516386                    | 4.79E-30  | 2.729484993                    | 4.34E-24 | 3.602199427                    | 7.60E-41  |
| DEFB4B   | 8.529450849                    | 6.35E-30  | 7.247387411                    | 5.10E-22 | 8.763269506                    | 1.66E-31  |
| RND1     | 5.312025187                    | 2.41E-29  | 4.598626528                    | 2.16E-22 | 5.708464338                    | 1.22E-33  |
| SLC6A14  | 4.009310783                    | 3.70E-29  | 4.316768253                    | 1.55E-33 | 4.63707372                     | 1.94E-38  |
| SGPP2    | 2.779400717                    | 3.61E-27  | 2.349900241                    | 7.23E-20 | 2.802115976                    | 1.33E-27  |
| IL1A     | 7.59718865                     | 2.84E-26  | 7.267940362                    | 3.50E-24 | 8.374733915                    | 1.43E-31  |
| NFKB1    | 2.111039718                    | 1.95E-25  | 1.898030267                    | 7.22E-21 | 2.306178457                    | 4.60E-30  |
| BCL3     | 2.739360509                    | 2.14E-25  | 1.997196354                    | 4.17E-14 | 2.405858959                    | 6.60E-20  |
| CEBPD    | 3.449835774                    | 2.20E-25  | 2.907407403                    | 1.78E-18 | 3.536643017                    | 1.31E-26  |
| IRF1     | 2.043041475                    | 2.23E-25  | 1.917409367                    | 1.41E-22 | 2.617667643                    | 7.90E-41  |
| LDLR     | 1.177490947                    | 2.08E-25  | 0.85774379                     | 3.28E-14 | 1.293437906                    | 2.44E-30  |

|         |             |          |             |          |             |          |
|---------|-------------|----------|-------------|----------|-------------|----------|
| IRAK2   | 3.649313339 | 3.62E-25 | 3.232457477 | 4.44E-20 | 3.636873406 | 5.10E-25 |
| HDAC9   | 3.10336985  | 1.24E-24 | 2.713615117 | 3.42E-19 | 3.783733153 | 6.33E-36 |
| SAV1    | 2.291922907 | 3.24E-24 | 2.076529676 | 3.59E-20 | 2.981172423 | 5.98E-40 |
| SGK1    | 2.600118244 | 6.30E-24 | 2.29452685  | 5.56E-19 | 2.486597332 | 5.07E-22 |
| IFNGR1  | 1.740105298 | 1.88E-23 | 1.660597783 | 1.64E-21 | 2.024654967 | 3.34E-31 |
| ZFAND5  | 0.804447457 | 1.85E-23 | 0.445129401 | 3.37E-08 | 0.757558747 | 5.16E-21 |
| VNN3    | 3.63693001  | 4.65E-23 | 2.956549975 | 1.63E-15 | 3.869040659 | 4.24E-26 |
| DUSP5   | 3.217158659 | 6.73E-23 | 2.758163632 | 3.03E-17 | 3.001526155 | 3.88E-20 |
| CD69    | 4.806380611 | 1.21E-22 | 4.796183442 | 1.44E-22 | 4.910346182 | 1.40E-23 |
| LIPG    | 1.76816937  | 3.58E-22 | 1.369567453 | 6.50E-14 | 1.743506897 | 1.30E-21 |
| C2CD4A  | 3.7901461   | 4.33E-22 | 3.240596136 | 1.54E-16 | 4.394334358 | 3.15E-29 |
| JUND    | 1.341976453 | 8.32E-22 | 0.616231799 | 1.13E-05 | 1.078270284 | 1.32E-14 |
| RNF145  | 1.019456121 | 1.58E-21 | 0.854453817 | 1.37E-15 | 1.203756122 | 1.70E-29 |
| TMPRSS2 | 2.401348235 | 1.65E-21 | 2.034702095 | 7.03E-16 | 2.508295612 | 2.51E-23 |
| CACNG8  | 1.718047724 | 3.05E-21 | 1.39484502  | 1.83E-14 | 1.829832619 | 3.51E-24 |
| ADAMTS9 | 2.168377076 | 5.79E-21 | 1.751245438 | 3.30E-14 | 2.001807302 | 4.24E-18 |
| SQSTM1  | 1.797744679 | 6.94E-21 | 1.454706028 | 3.32E-14 | 1.886275548 | 7.69E-23 |
| ITGB8   | 1.850364788 | 7.89E-21 | 1.593186883 | 7.59E-16 | 1.926837655 | 1.80E-22 |
| TICAM1  | 3.166682874 | 1.30E-20 | 2.490350932 | 2.93E-13 | 3.364775696 | 3.81E-23 |
| TNFSF14 | 3.302721875 | 1.38E-20 | 3.06431748  | 5.45E-18 | 3.026265337 | 1.79E-17 |
| NINJ1   | 1.942390635 | 1.55E-20 | 1.467916694 | 2.36E-12 | 1.900623672 | 9.52E-20 |
| PROX1   | 2.840503868 | 1.84E-20 | 2.820695987 | 3.23E-20 | 2.901678581 | 2.64E-21 |
| CXCL10  | 5.822795639 | 3.28E-20 | 4.866426642 | 1.46E-14 | 5.354534231 | 2.53E-17 |
| OAS3    | 1.446742372 | 3.66E-20 | 0.746660091 | 2.31E-06 | 1.284356491 | 3.23E-16 |
| STAT5A  | 2.992247442 | 4.05E-20 | 2.550995087 | 4.96E-15 | 3.129833415 | 6.61E-22 |
| IL17C   | 9.49583194  | 5.04E-20 | 8.8160113   | 1.80E-17 | 9.847392627 | 2.03E-21 |
| BBC3    | 2.942048984 | 6.53E-20 | 2.84412654  | 9.77E-19 | 3.384717438 | 5.72E-26 |
| SLC2A6  | 2.766167786 | 7.99E-20 | 2.396886403 | 3.19E-15 | 2.957911657 | 1.49E-22 |
| CSF3    | 10.81361385 | 1.25E-19 | 10.01623876 | 4.65E-17 | 11.82422423 | 3.65E-23 |
| CYP3A5  | 1.952226902 | 2.22E-19 | 1.394407272 | 1.30E-10 | 2.146270338 | 4.19E-23 |
| TUBB2A  | 1.375637374 | 2.33E-19 | 0.950254549 | 5.45E-10 | 1.516212734 | 2.95E-23 |
| HIVEP1  | 1.277857282 | 3.11E-19 | 0.975524137 | 8.24E-12 | 1.15693279  | 5.04E-16 |
| IL23A   | 4.783281807 | 3.29E-19 | 4.133386066 | 1.14E-14 | 5.451023371 | 1.29E-24 |
| IL7     | 4.130611548 | 3.28E-19 | 3.485005796 | 4.77E-14 | 4.177456127 | 1.03E-19 |
| PLK2    | 2.029899193 | 3.39E-19 | 1.645954817 | 3.89E-13 | 2.147615835 | 2.63E-21 |
| HIVEP2  | 1.720344629 | 3.60E-19 | 1.189534051 | 6.39E-10 | 1.427808407 | 1.14E-13 |
| IL17RB  | 1.579097353 | 4.69E-19 | 0.953895112 | 8.47E-08 | 1.178416109 | 3.26E-11 |
| ZNFX1   | 0.972698453 | 4.88E-19 | 0.605396045 | 2.98E-08 | 0.732858952 | 1.89E-11 |
| BAZ1A   | 1.208574289 | 7.15E-19 | 0.908131392 | 2.66E-11 | 1.350951511 | 3.29E-23 |
| IL1B    | 5.768983172 | 8.32E-19 | 4.973907374 | 2.31E-14 | 6.152869922 | 3.48E-21 |
| ETV3    | 1.013376981 | 8.95E-19 | 0.626763563 | 4.68E-08 | 1.036520304 | 1.24E-19 |
| LIF     | 2.688049691 | 1.17E-18 | 2.548245686 | 6.32E-17 | 3.420338284 | 2.94E-29 |
| BCL10   | 1.1391055   | 1.31E-18 | 0.730812598 | 1.69E-08 | 1.073281794 | 1.03E-16 |
| LTB     | 4.463330623 | 1.43E-18 | 4.528176703 | 3.85E-19 | 4.047184601 | 1.64E-15 |
| TNIP1   | 1.533268357 | 2.07E-18 | 1.319123953 | 5.09E-14 | 1.647833987 | 4.98E-21 |
| EFNB1   | 1.296846898 | 3.12E-17 | 1.031936517 | 1.86E-11 | 1.321744305 | 7.13E-18 |
| B4GALT5 | 0.80779472  | 5.47E-17 | 0.425304768 | 1.06E-05 | 0.771714295 | 1.16E-15 |

|           |              |          |              |           |              |          |
|-----------|--------------|----------|--------------|-----------|--------------|----------|
| BMP2      | 2.469997358  | 2.09E-16 | 1.772195086  | 3.80E-09  | 2.622884854  | 2.62E-18 |
| PLAUR     | 1.864478113  | 2.11E-16 | 1.339539119  | 3.81E-09  | 2.126303282  | 6.52E-21 |
| SPRR2A    | 7.137167727  | 3.74E-16 | 4.852018191  | 3.88E-08  | 7.111741313  | 4.69E-16 |
| CSF1      | 2.033777985  | 4.37E-16 | 1.741887377  | 3.44E-12  | 2.241866236  | 2.80E-19 |
| PIM2      | 1.885268375  | 4.34E-16 | 1.435874457  | 6.42E-10  | 1.889623929  | 3.46E-16 |
| HS3ST1    | 2.065059483  | 5.48E-16 | 1.398284623  | 4.29E-08  | 2.113505853  | 9.98E-17 |
| EPHA2     | 1.586905022  | 8.66E-16 | 1.327110397  | 1.72E-11  | 1.991459165  | 5.07E-24 |
| OXTR      | 2.413350757  | 8.64E-16 | 2.109295435  | 2.09E-12  | 2.504080697  | 5.68E-17 |
| ADAR      | 0.445101289  | 9.00E-16 | 0.214220207  | 0.0001081 | 0.239002553  | 1.57E-05 |
| NEDD4L    | 1.357556998  | 1.33E-15 | 1.123878736  | 3.74E-11  | 1.379243009  | 4.69E-16 |
| TRAF3     | 1.158072703  | 1.32E-15 | 0.788739693  | 5.34E-08  | 1.006912671  | 3.59E-12 |
| B3GNT5    | 1.119425574  | 1.34E-15 | 0.763780203  | 5.02E-08  | 1.237924842  | 8.56E-19 |
| ZBTB38    | 1.102221995  | 1.40E-15 | 0.801277409  | 6.33E-09  | 1.145782876  | 9.71E-17 |
| TRIM16    | 1.414374978  | 1.54E-15 | 1.135643937  | 1.57E-10  | 1.627370751  | 4.15E-20 |
| IFNGR2    | 1.436482993  | 1.70E-15 | 1.2540248    | 3.64E-12  | 1.707774747  | 2.81E-21 |
| EHD1      | 1.87520531   | 1.79E-15 | 1.491451057  | 2.64E-10  | 1.934493989  | 2.08E-16 |
| ARRDC3    | 2.514627345  | 1.83E-15 | 2.823643728  | 4.20E-19  | 3.397792432  | 5.96E-27 |
| C8orf4    | 3.119492729  | 2.10E-15 | 3.108257851  | 2.54E-15  | 3.780162998  | 5.85E-22 |
| IL18R1    | 1.899346031  | 3.13E-15 | 1.416550349  | 4.43E-09  | 2.032623962  | 2.88E-17 |
| IRGQ      | 0.698095991  | 3.17E-15 | 0.649000823  | 1.97E-13  | 0.853556039  | 3.64E-22 |
| STX11     | 4.833583142  | 3.34E-15 | 4.095553438  | 3.04E-11  | 4.830503048  | 3.26E-15 |
| FAM222A   | 1.945554799  | 3.95E-15 | 1.374464716  | 3.27E-08  | 1.852568205  | 7.16E-14 |
| ICOSLG    | 2.407164067  | 5.07E-15 | 1.896141998  | 7.63E-10  | 2.08647827   | 1.24E-11 |
| ANKRD36C  | 1.955679169  | 5.90E-15 | 1.639283641  | 6.06E-11  | 2.41491327   | 5.16E-22 |
| DCUN1D3   | 1.071046101  | 8.17E-15 | 0.677999624  | 9.31E-07  | 0.906070302  | 5.16E-11 |
| IER3      | 2.589488192  | 8.80E-15 | 2.836606666  | 1.92E-17  | 3.257539559  | 1.65E-22 |
| NFKBIE    | 2.247033536  | 9.49E-15 | 1.889068799  | 7.76E-11  | 2.005839457  | 5.02E-12 |
| PPP1R3B   | -1.26599918  | 9.66E-15 | -1.094206136 | 1.59E-11  | -0.695430549 | 1.73E-05 |
| RAB11FIP1 | 1.356397558  | 1.36E-14 | 0.762980218  | 1.49E-05  | 1.73767542   | 5.60E-23 |
| KYNU      | 2.657295891  | 1.66E-14 | 2.411417956  | 3.21E-12  | 3.460928934  | 1.41E-23 |
| KBTBD7    | -0.821056125 | 2.86E-14 | -0.804196347 | 3.17E-14  | -1.116211203 | 1.91E-24 |
| KLHL25    | 1.260125494  | 3.02E-14 | 0.789250809  | 2.19E-06  | 0.742756376  | 9.07E-06 |
| ZNF217    | 0.787014183  | 3.80E-14 | 0.502040924  | 1.38E-06  | 0.759323894  | 2.58E-13 |
| PPAP2B    | 1.423781217  | 4.27E-14 | 1.219609462  | 9.79E-11  | 1.359410267  | 5.50E-13 |
| TRIM69    | 1.42042355   | 4.43E-14 | 1.01200944   | 7.66E-08  | 1.558526559  | 1.02E-16 |
| NABP1     | 1.262692142  | 4.49E-14 | 1.11462908   | 2.69E-11  | 1.231423651  | 1.81E-13 |
| TNFAIP8   | 1.686401449  | 8.89E-14 | 1.828557562  | 5.85E-16  | 2.063157812  | 6.68E-20 |
| FAM101A   | 2.634837695  | 1.35E-13 | 1.593958496  | 7.69E-06  | 2.842051189  | 1.41E-15 |
| BID       | 1.61192077   | 1.47E-13 | 1.081591523  | 7.25E-07  | 1.631741958  | 7.17E-14 |
| PPAPDC2   | 1.283805349  | 1.46E-13 | 1.020159921  | 4.35E-09  | 1.496010025  | 4.94E-18 |
| FRAT2     | -1.373859344 | 1.55E-13 | -0.802601603 | 8.53E-06  | -0.95093707  | 1.68E-07 |
| OTUD1     | 1.501738959  | 1.54E-13 | 1.264826472  | 5.01E-10  | 1.873414242  | 2.24E-20 |
| TNF       | 7.16562878   | 1.70E-13 | 6.714586769  | 5.10E-12  | 7.564796441  | 6.73E-15 |
| TBC1D10A  | 1.201586133  | 2.03E-13 | 0.749296659  | 5.03E-06  | 1.211769378  | 1.15E-13 |
| ARL14     | 1.983015286  | 2.13E-13 | 1.87303227   | 4.00E-12  | 2.732875577  | 3.49E-24 |
| ZNF607    | -0.894342003 | 2.39E-13 | -0.684932104 | 4.84E-09  | -0.82963225  | 3.60E-12 |
| SPRR1A    | 5.167015134  | 2.41E-13 | 4.373662409  | 6.35E-10  | 5.87424361   | 6.84E-17 |

|            |              |          |              |           |              |          |
|------------|--------------|----------|--------------|-----------|--------------|----------|
| NFKBID     | 1.534520353  | 3.24E-13 | 1.056383113  | 6.97E-07  | 1.617518544  | 1.12E-14 |
| PPP1R15A   | 1.805073916  | 3.30E-13 | 1.505804327  | 1.25E-09  | 2.261754278  | 6.58E-20 |
| CT83       | 4.73743086   | 3.33E-13 | 4.265260345  | 6.34E-11  | 4.783819691  | 1.75E-13 |
| BTG2       | 1.498646555  | 4.24E-13 | 0.958905981  | 3.58E-06  | 1.789989062  | 4.62E-18 |
| SLC37A1    | 0.971662431  | 4.22E-13 | 0.757810148  | 1.54E-08  | 1.222402675  | 5.33E-20 |
| ANKRD36    | 1.125867938  | 4.95E-13 | 0.691862672  | 9.10E-06  | 1.37486582   | 8.88E-19 |
| IL32       | 2.245783163  | 6.44E-13 | 2.346714733  | 5.05E-14  | 2.190104849  | 2.30E-12 |
| IER5       | 1.383515185  | 7.34E-13 | 1.036450451  | 8.12E-08  | 1.694213855  | 9.82E-19 |
| NFKBIB     | 1.401633246  | 8.77E-13 | 1.165880519  | 2.84E-09  | 1.48888456   | 2.48E-14 |
| CLEC2D     | 1.824600999  | 1.17E-12 | 1.831161828  | 7.76E-13  | 2.418754435  | 2.05E-21 |
| RAB9A      | 1.513924455  | 1.58E-12 | 0.909961789  | 2.54E-05  | 1.291440963  | 1.73E-09 |
| IFNAR2     | 1.428858611  | 1.59E-12 | 1.368271722  | 1.30E-11  | 1.58545147   | 4.06E-15 |
| MOB3C      | 1.134721146  | 1.64E-12 | 0.754743613  | 2.82E-06  | 1.079520009  | 1.72E-11 |
| PPP1R15B   | 0.904193555  | 1.99E-12 | 0.415025533  | 0.0012516 | 0.988892303  | 1.38E-14 |
| UBQLN4     | 0.878627957  | 2.00E-12 | 0.432085948  | 0.0005556 | 0.731674331  | 4.68E-09 |
| ZBTB10     | 1.17372463   | 2.23E-12 | 0.926670754  | 2.99E-08  | 1.285947593  | 1.39E-14 |
| DEFB4A     | 8.888424608  | 2.69E-12 | 8.33915611   | 5.49E-11  | 9.594172673  | 4.16E-14 |
| ZNF792     | -1.089814875 | 2.96E-12 | -0.908642966 | 3.00E-09  | -1.118093968 | 6.50E-13 |
| PHLDA1     | 1.463355019  | 3.12E-12 | 1.117088502  | 1.03E-07  | 1.340050167  | 1.72E-10 |
| SAT1       | 1.795936683  | 3.13E-12 | 1.37746133   | 8.94E-08  | 2.052643046  | 1.60E-15 |
| RIPK2      | 1.417438382  | 3.91E-12 | 1.175879377  | 8.43E-09  | 1.670935001  | 2.31E-16 |
| KLRK1      | 2.183328226  | 3.98E-12 | 1.66397262   | 1.49E-07  | 1.957814546  | 5.52E-10 |
| RAB4B      | 1.504651145  | 4.73E-12 | 1.082318433  | 6.79E-07  | 1.282562721  | 3.85E-09 |
| ALAS1      | 1.126055274  | 5.08E-12 | 0.771644505  | 2.24E-06  | 0.977844969  | 2.02E-09 |
| P11-986E7. | 3.28200507   | 5.65E-12 | 2.853430792  | 2.42E-09  | 3.822380251  | 5.34E-16 |
| CCNL1      | 0.864911449  | 6.33E-12 | 0.480526949  | 0.0001364 | 0.725047953  | 8.41E-09 |
| IL19       | 6.968164513  | 6.56E-12 | 4.660958545  | 5.81E-06  | 6.628798486  | 6.64E-11 |
| MFHAS1     | 1.016501617  | 6.69E-12 | 0.618748652  | 2.88E-05  | 0.822311909  | 2.66E-08 |
| LCN2       | 5.63821581   | 7.06E-12 | 4.91781109   | 2.24E-09  | 6.247922505  | 2.98E-14 |
| JAK2       | 1.542833051  | 7.67E-12 | 1.275899619  | 1.50E-08  | 1.905327545  | 2.53E-17 |
| IL4R       | 1.057477395  | 8.06E-12 | 0.809209704  | 1.72E-07  | 1.237795502  | 1.06E-15 |
| GJB2       | 2.244405452  | 8.62E-12 | 2.083563037  | 2.29E-10  | 3.107120374  | 2.47E-21 |
| DUSP16     | 1.335715473  | 9.59E-12 | 1.247685915  | 1.95E-10  | 1.350296881  | 5.35E-12 |
| SOWAHB     | 1.144275144  | 9.77E-12 | 0.444596568  | 0.0085099 | 1.186744189  | 1.49E-12 |
| SPRR2F     | 6.507675014  | 1.02E-11 | 4.666644693  | 1.28E-06  | 6.97785579   | 2.79E-13 |
| GCNT3      | 1.736908116  | 1.07E-11 | 1.224461892  | 1.66E-06  | 1.70430326   | 2.57E-11 |
| PTS        | 0.932116402  | 1.09E-11 | 0.826123311  | 1.50E-09  | 1.05213571   | 1.19E-14 |
| TRIM31     | 2.50337826   | 1.29E-11 | 1.993799514  | 7.10E-08  | 2.480050721  | 1.95E-11 |
| RAB3IP     | 1.072379338  | 1.35E-11 | 0.894189737  | 1.78E-08  | 1.398492122  | 9.77E-19 |
| CCSAP      | -0.576623256 | 1.47E-11 | -0.258460576 | 0.0015    | -0.477679357 | 9.99E-09 |
| C3         | 2.25746585   | 1.50E-11 | 2.558049102  | 2.06E-14  | 1.948239616  | 5.79E-09 |
| NFATC2     | 1.666323776  | 1.59E-11 | 1.126197009  | 5.44E-06  | 1.422162315  | 8.56E-09 |
| RND3       | 1.06639598   | 1.73E-11 | 0.973202405  | 8.37E-10  | 1.578307685  | 2.12E-23 |
| DUSP4      | 1.283231304  | 1.94E-11 | 0.782968733  | 4.29E-05  | 1.222559908  | 1.60E-10 |
| MESDC1     | 0.837385314  | 2.27E-11 | 0.662303892  | 1.16E-07  | 1.056348954  | 1.56E-17 |
| ANKLE2     | 0.824629444  | 2.56E-11 | 0.453774674  | 0.0002422 | 0.811576083  | 4.99E-11 |
| FAM43A     | 3.132223489  | 3.19E-11 | 3.183230831  | 1.44E-11  | 3.224346591  | 7.93E-12 |

|            |              |          |              |           |              |          |
|------------|--------------|----------|--------------|-----------|--------------|----------|
| LAMC2      | 1.255188588  | 4.04E-11 | 0.899875345  | 2.21E-06  | 1.291588986  | 1.09E-11 |
| CCRN4L     | 1.529825708  | 4.10E-11 | 1.281651273  | 3.15E-08  | 1.815460616  | 3.88E-15 |
| TRAF3IP2   | 0.974070887  | 4.28E-11 | 0.620946029  | 2.69E-05  | 0.983507695  | 2.60E-11 |
| ZBTB21     | 0.955640064  | 4.57E-11 | 0.657961583  | 6.01E-06  | 1.066223729  | 1.76E-13 |
| PELI1      | 0.905510036  | 5.15E-11 | 0.668620227  | 1.25E-06  | 1.189503632  | 5.57E-18 |
| SH2B3      | 1.425091757  | 5.39E-11 | 1.119157794  | 2.58E-07  | 1.155153291  | 1.08E-07 |
| HES1       | -0.848260386 | 5.52E-11 | -0.595427281 | 3.23E-06  | -0.69409725  | 6.46E-08 |
| PPP1R3D    | -0.962579607 | 6.78E-11 | -0.66605357  | 1.56E-06  | -0.963250707 | 3.07E-11 |
| SMAD3      | 1.28481985   | 6.99E-11 | 1.074402871  | 4.97E-08  | 1.272329719  | 1.07E-10 |
| ZFP36      | 1.677238543  | 7.05E-11 | 1.378153754  | 8.50E-08  | 2.228898169  | 3.95E-18 |
| RBBP8NL    | -1.918982353 | 7.75E-11 | -2.257535596 | 3.13E-14  | -2.104709877 | 1.16E-12 |
| NUAK2      | 2.165806343  | 7.99E-11 | 2.219619243  | 2.18E-11  | 1.612687794  | 1.58E-06 |
| GPR37L1    | 1.660161214  | 8.24E-11 | 1.256368307  | 1.08E-06  | 1.700059671  | 2.02E-11 |
| UBASH3A    | 4.813833876  | 8.83E-11 | 4.097832555  | 3.66E-08  | 5.207411697  | 1.83E-12 |
| BTG1       | 1.088425096  | 1.06E-10 | 0.595834498  | 0.0004066 | 0.993227405  | 3.70E-09 |
| CAB39      | 0.65783769   | 1.26E-10 | 0.31879077   | 0.0018533 | 0.570594868  | 2.38E-08 |
| CFB        | 1.46576135   | 1.42E-10 | 1.186378557  | 2.08E-07  | 1.377373383  | 1.67E-09 |
| DUSP6      | 1.2212528    | 1.47E-10 | 1.193204725  | 3.79E-10  | 1.514699579  | 1.82E-15 |
| NEURL3     | 5.227028624  | 1.77E-10 | 5.158655847  | 2.92E-10  | 5.630088179  | 5.40E-12 |
| SLC5A5     | 2.272959365  | 2.05E-10 | 1.499206058  | 3.60E-05  | 2.005871844  | 1.91E-08 |
| FNBP1      | 0.757392907  | 2.73E-10 | 0.605142086  | 4.72E-07  | 0.657864321  | 4.42E-08 |
| TAF4B      | 1.299543664  | 2.75E-10 | 1.156973663  | 1.79E-08  | 1.46862062   | 7.96E-13 |
| F2RL1      | 1.008342722  | 2.81E-10 | 0.621986075  | 0.0001002 | 1.082220694  | 1.25E-11 |
| KLHL5      | 0.639434179  | 3.23E-10 | 0.704646167  | 3.12E-12  | 0.676271788  | 2.41E-11 |
| CCL2       | 3.204770151  | 3.25E-10 | 2.888227769  | 1.47E-08  | 3.428222042  | 1.75E-11 |
| P1-145M24  | 3.524064556  | 3.59E-10 | 3.575541938  | 1.54E-10  | 4.365708664  | 2.81E-15 |
| TMEM217    | 2.3892582    | 3.71E-10 | 1.966553962  | 2.61E-07  | 2.668772758  | 1.53E-12 |
| TNFRSF10E  | 0.988747421  | 3.77E-10 | 0.638679877  | 5.23E-05  | 0.935526939  | 3.09E-09 |
| BACH1      | 0.856832844  | 3.91E-10 | 0.636225289  | 3.34E-06  | 0.736417491  | 7.46E-08 |
| GPBP1      | 0.457963598  | 4.86E-10 | 0.232950743  | 0.0015424 | 0.452558665  | 7.09E-10 |
| AC159540.1 | 2.614350848  | 6.20E-10 | 1.795014171  | 2.85E-05  | 3.448331599  | 1.21E-16 |
| TLE4       | 0.855814881  | 6.18E-10 | 0.39938633   | 0.0039895 | 0.757438187  | 4.44E-08 |
| SOCS3      | 2.398482444  | 6.26E-10 | 2.776440052  | 7.86E-13  | 3.091275678  | 1.49E-15 |
| TNFRSF9    | 7.655762415  | 7.55E-10 | 7.27578424   | 4.97E-09  | 7.761165932  | 4.26E-10 |
| RELB       | 3.865862186  | 1.05E-09 | 3.222935703  | 3.77E-07  | 3.997406631  | 2.71E-10 |
| CTTNBP2NL  | 0.670808282  | 1.35E-09 | 0.489268343  | 9.83E-06  | 0.511855271  | 3.72E-06 |
| TRIP10     | 0.737189045  | 1.40E-09 | 0.382561169  | 0.0016843 | 0.604925245  | 6.48E-07 |
| TRIB1      | 1.069964371  | 1.45E-09 | 0.576748408  | 0.0011202 | 0.906990833  | 2.88E-07 |
| UBD        | 2.641294127  | 1.47E-09 | 3.309822285  | 2.84E-14  | 4.224081434  | 2.38E-22 |
| NFATC1     | 2.390811127  | 1.50E-09 | 2.331744882  | 3.62E-09  | 2.286746747  | 7.50E-09 |
| PPP4R2     | 0.632660838  | 1.53E-09 | 0.498160949  | 1.92E-06  | 0.788154027  | 4.81E-14 |
| CCDC130    | 0.595720303  | 1.78E-09 | 0.242902758  | 0.0152037 | 0.344753486  | 0.000554 |
| MED24      | 0.780437562  | 1.83E-09 | 0.107033723  | 0.4126955 | 0.605543496  | 3.00E-06 |
| PMAIP1     | 1.665596092  | 1.98E-09 | 1.388194733  | 5.77E-07  | 2.020772713  | 3.05E-13 |
| CLIP2      | 1.035375455  | 2.14E-09 | 0.694729574  | 5.94E-05  | 0.917532095  | 1.13E-07 |
| PRRG1      | 1.389641439  | 2.17E-09 | 1.119496328  | 1.45E-06  | 1.359707986  | 4.77E-09 |
| TAPBP      | 0.7437541    | 2.25E-09 | 0.250906562  | 0.0439722 | 0.562078979  | 6.22E-06 |

|          |              |          |              |           |              |          |
|----------|--------------|----------|--------------|-----------|--------------|----------|
| CPEB2    | 1.16870669   | 2.28E-09 | 0.906131287  | 3.60E-06  | 1.298885246  | 2.75E-11 |
| RARRES1  | 1.892233002  | 2.62E-09 | 1.817732867  | 1.03E-08  | 1.665021437  | 1.63E-07 |
| ZKSCAN1  | -0.665105788 | 2.62E-09 | -0.348228563 | 0.0014481 | -0.555314992 | 4.60E-07 |
| ZNF697   | 1.014635296  | 3.99E-09 | 1.104461071  | 1.28E-10  | 0.938767669  | 5.06E-08 |
| SGMS2    | 1.120511235  | 4.47E-09 | 0.829473751  | 1.42E-05  | 1.319338693  | 4.81E-12 |
| TXNRD1   | 0.839416297  | 4.91E-09 | 0.834109712  | 5.92E-09  | 1.101646781  | 1.49E-14 |
| JAG1     | 1.095774712  | 4.97E-09 | 0.8746941    | 3.04E-06  | 1.306357233  | 3.05E-12 |
| PATL1    | 0.724817987  | 5.47E-09 | 0.125498865  | 0.316534  | 0.422077799  | 0.000711 |
| TYK2     | 0.650297657  | 5.52E-09 | 0.238917487  | 0.0327582 | 0.429939737  | 0.00012  |
| HIPK1    | 0.560260926  | 5.58E-09 | 0.236424298  | 0.0139777 | 0.331306257  | 0.00057  |
| GRAMD4P7 | 2.115499727  | 5.87E-09 | 1.511243537  | 4.09E-05  | 1.9317945    | 1.11E-07 |
| PHKG2    | 0.667345954  | 5.96E-09 | 0.438670345  | 0.0001296 | 0.640342656  | 2.02E-08 |
| TTC9     | 1.0829132    | 6.01E-09 | 0.758539455  | 4.71E-05  | 1.273290235  | 6.64E-12 |
| BEND3    | 1.278670641  | 6.07E-09 | 0.788811412  | 0.0003395 | 1.708615402  | 6.96E-15 |
| NAMPT    | 1.846051828  | 6.18E-09 | 1.80080379   | 1.43E-08  | 2.409131394  | 3.28E-14 |
| SLC52A3  | 1.352317058  | 6.40E-09 | 1.307636541  | 1.96E-08  | 1.062076684  | 5.50E-06 |
| ING2     | -0.830460204 | 6.55E-09 | -0.581003921 | 3.00E-05  | -0.49302613  | 0.000394 |
| PRDM1    | 1.582649491  | 6.57E-09 | 1.224131755  | 7.59E-06  | 1.594915005  | 5.01E-09 |
| NR4A1    | 1.835234274  | 6.64E-09 | 1.195537697  | 0.0001624 | 1.608111427  | 3.76E-07 |
| VMP1     | 0.680869159  | 7.16E-09 | 0.424680509  | 0.0003067 | 0.703953103  | 2.12E-09 |
| ZSWIM4   | 1.280901412  | 9.53E-09 | 0.910239122  | 4.78E-05  | 1.083420927  | 1.34E-06 |
| MTND4P23 | 3.805654512  | 1.00E-08 | 2.756060518  | 4.98E-05  | 4.192298737  | 1.85E-10 |
| TLR4     | 1.184060272  | 1.05E-08 | 0.354571223  | 0.0871369 | 0.911900932  | 1.05E-05 |
| PLSCR1   | 0.723644117  | 1.10E-08 | 0.416624474  | 0.0010047 | 0.923150591  | 2.69E-13 |
| CXCL16   | 1.097651813  | 1.14E-08 | 0.857618853  | 8.17E-06  | 1.190200463  | 5.59E-10 |
| PRKAB2   | -0.972853978 | 1.15E-08 | -0.85271716  | 4.53E-07  | -1.096106068 | 1.15E-10 |
| DUSP1    | 2.115196352  | 1.20E-08 | 1.384340039  | 0.0001955 | 2.672579836  | 5.57E-13 |
| FRK      | 0.841036073  | 1.20E-08 | 0.498683243  | 0.0007285 | 0.808829005  | 4.20E-08 |
| SLC8B1   | 1.318449818  | 1.21E-08 | 1.055542539  | 5.32E-06  | 1.315043526  | 1.26E-08 |
| ATF3     | 2.705966196  | 1.26E-08 | 1.814395133  | 0.0001379 | 2.807778472  | 3.47E-09 |
| LAMA3    | 1.298037566  | 1.31E-08 | 0.932220463  | 4.45E-05  | 1.656557036  | 3.97E-13 |
| EHF      | 1.299161433  | 1.33E-08 | 1.318125913  | 8.05E-09  | 1.622403196  | 1.23E-12 |
| ITPKC    | 1.09716854   | 1.36E-08 | 0.563327527  | 0.0036027 | 1.373723977  | 1.08E-12 |
| B4GALT1  | 1.115604832  | 1.62E-08 | 0.350566392  | 0.076336  | 1.118250318  | 1.48E-08 |
| MACC1    | 0.759313775  | 1.79E-08 | 0.482325735  | 0.0003476 | 1.178303785  | 2.14E-18 |
| LPIN1    | 0.82146875   | 1.82E-08 | 0.631687233  | 1.51E-05  | 0.846032183  | 6.68E-09 |
| GCNT4    | 1.230691352  | 1.84E-08 | 0.868443489  | 7.31E-05  | 1.499285467  | 6.19E-12 |
| NRARP    | 1.853718454  | 2.14E-08 | 1.43238863   | 1.62E-05  | 2.169147339  | 4.04E-11 |
| ICAM4    | 2.267458828  | 2.24E-08 | 1.847512795  | 5.95E-06  | 2.46710959   | 8.22E-10 |
| RAC1     | 0.650513785  | 2.32E-08 | 0.316889218  | 0.0065096 | 0.704796793  | 1.40E-09 |
| PSEN1    | 0.490822145  | 2.55E-08 | 0.294551889  | 0.0008256 | 0.596513973  | 1.14E-11 |
| NFE2L2   | 0.71177422   | 2.63E-08 | 0.258679319  | 0.043479  | 0.617672486  | 1.36E-06 |
| C22orf29 | -0.708600679 | 2.68E-08 | -0.791847032 | 4.14E-10  | -0.958504235 | 6.82E-14 |
| USP54    | 0.829382997  | 2.77E-08 | 0.150795747  | 0.3137671 | 0.989850473  | 3.19E-11 |
| AASDHPPT | -0.547715944 | 3.21E-08 | -0.133858089 | 0.1704118 | -0.341783537 | 0.000514 |
| HBEGF    | 1.916802913  | 3.41E-08 | 1.895139381  | 4.72E-08  | 2.329537797  | 1.78E-11 |
| ZNF174   | -0.881269003 | 3.55E-08 | -0.539262622 | 0.0004774 | -0.802366138 | 3.53E-07 |

|          |              |          |              |           |              |          |
|----------|--------------|----------|--------------|-----------|--------------|----------|
| CREB1    | 0.749389686  | 3.96E-08 | 0.341271278  | 0.0123417 | 0.504252369  | 0.000218 |
| FUT2     | 0.879864821  | 3.99E-08 | 0.550908894  | 0.0005916 | 0.919375763  | 9.18E-09 |
| SOWAHC   | -0.694632914 | 3.98E-08 | -0.396164633 | 0.0015032 | -0.721962007 | 1.03E-08 |
| BTG3     | 0.887944717  | 4.10E-08 | 0.811685872  | 5.04E-07  | 1.246044012  | 1.02E-14 |
| KBTBD6   | -0.702569004 | 4.32E-08 | -0.556316151 | 1.06E-05  | -0.912373864 | 1.33E-12 |
| MRFAP1L1 | -0.496605297 | 4.38E-08 | -0.315207306 | 0.0004275 | -0.336419976 | 0.000181 |
| FOSL1    | 1.717539229  | 4.45E-08 | 0.979756625  | 0.0019015 | 1.486166963  | 2.27E-06 |
| RASD1    | 2.596289802  | 4.45E-08 | 1.861609769  | 0.0001113 | 3.036521242  | 9.13E-11 |
| HAUS3    | -0.561782037 | 4.89E-08 | -0.498939248 | 9.13E-07  | -0.475616581 | 3.22E-06 |
| LRRC49   | 1.403713636  | 4.94E-08 | 1.206661138  | 2.58E-06  | 1.43634038   | 2.12E-08 |
| PLAU     | 3.011383875  | 5.48E-08 | 3.013552082  | 5.34E-08  | 3.715226397  | 1.97E-11 |
| STEAP2   | 0.890231049  | 5.49E-08 | 0.57300105   | 0.0004859 | 0.830116149  | 3.91E-07 |
| ETS1     | 0.828584335  | 5.82E-08 | 0.766536548  | 5.12E-07  | 0.834011362  | 4.68E-08 |
| DUSP8    | 2.94146364   | 6.29E-08 | 2.85018372   | 9.22E-08  | 3.064439498  | 1.40E-08 |
| KITLG    | -0.996424683 | 6.86E-08 | -0.954224965 | 2.24E-07  | -1.167569012 | 2.58E-10 |
| DYRK2    | 0.657999406  | 6.99E-08 | 0.289929645  | 0.0175404 | 0.478167522  | 8.93E-05 |
| CCDC66   | -0.773949121 | 7.28E-08 | -0.197009924 | 0.1608984 | -0.722537048 | 4.06E-07 |
| SERPINA3 | 2.978587362  | 7.66E-08 | 3.245184925  | 4.73E-09  | 3.832527153  | 4.63E-12 |
| LRRC8A   | 0.624346602  | 7.72E-08 | 0.295648459  | 0.011055  | 0.633840784  | 4.65E-08 |
| MYADM    | 0.800240417  | 7.99E-08 | 0.20401071   | 0.1735385 | 0.285141618  | 0.057176 |
| AHCYL2   | 1.178923757  | 8.02E-08 | 0.82335912   | 0.0001809 | 1.158976143  | 1.32E-07 |
| CFL2     | 0.832830221  | 8.04E-08 | 0.817978806  | 1.27E-07  | 0.983586017  | 2.07E-10 |
| C3orf58  | -0.540513232 | 8.24E-08 | -0.518160899 | 2.33E-07  | -0.560842712 | 2.39E-08 |
| RNF19A   | 1.249945501  | 9.21E-08 | 1.492239371  | 1.54E-10  | 1.811394649  | 6.04E-15 |
| SLFN5    | 1.430774817  | 9.41E-08 | 1.514522129  | 1.57E-08  | 2.026438555  | 3.75E-14 |
| RNF43    | -1.490723998 | 9.51E-08 | -1.051631069 | 0.0001556 | -1.619627811 | 6.86E-09 |
| ZNF267   | 0.588055518  | 9.77E-08 | 0.278048495  | 0.0117295 | 0.614726242  | 2.34E-08 |
| SESTD1   | 0.743611853  | 1.02E-07 | 0.709083993  | 3.70E-07  | 1.029678983  | 1.49E-13 |
| MCMDC2   | -0.8322481   | 1.03E-07 | -0.600657708 | 5.19E-05  | -0.561690769 | 0.000166 |
| ZFP30    | -0.825277026 | 1.04E-07 | -0.473723433 | 0.0019567 | -0.815814575 | 1.21E-07 |
| TPI1P3   | 2.895633959  | 1.07E-07 | 2.314034875  | 2.77E-05  | 2.78348557   | 3.16E-07 |
| USP12    | 0.614215359  | 1.09E-07 | 0.232304758  | 0.0448499 | 0.591418999  | 3.08E-07 |
| ERRFI1   | 1.619558769  | 1.10E-07 | 1.405031856  | 4.09E-06  | 2.239093124  | 2.09E-13 |
| SLC30A1  | -0.63295571  | 1.16E-07 | -0.849302127 | 1.15E-12  | -0.853374084 | 9.34E-13 |
| ZNF253   | -0.640727605 | 1.31E-07 | -0.468585958 | 9.16E-05  | -0.78487761  | 1.12E-10 |
| CYTH1    | 0.723495406  | 1.36E-07 | 0.593597511  | 1.57E-05  | 0.871646591  | 1.94E-10 |
| VPS9D1   | 1.248689778  | 1.39E-07 | 0.431389253  | 0.0709467 | 0.699070153  | 0.003181 |
| SDCBP    | 1.03531459   | 1.41E-07 | 0.803469866  | 4.42E-05  | 1.412955875  | 6.61E-13 |
| CEBPA    | -1.300896884 | 1.52E-07 | -1.362752169 | 3.54E-08  | -1.912418737 | 1.87E-14 |
| SNRPF    | -0.768523008 | 1.53E-07 | -0.240108701 | 0.0961112 | -0.094893115 | 0.510765 |
| IFIH1    | 0.952291189  | 1.63E-07 | 0.69075445   | 0.0001464 | 1.110248142  | 8.17E-10 |
| MAFK     | 0.868532604  | 1.73E-07 | 0.375712898  | 0.0244493 | 1.031169817  | 4.18E-10 |
| ZNF710   | 0.664737192  | 1.84E-07 | 0.278181805  | 0.029445  | 0.469342086  | 0.000237 |
| CCDC51   | -0.743184772 | 2.15E-07 | -0.473686585 | 0.0004982 | -0.721481182 | 2.77E-07 |
| GPX3     | 1.672737396  | 2.36E-07 | 1.230266183  | 0.0001426 | 1.415040204  | 1.29E-05 |
| ELK3     | 0.984042883  | 2.61E-07 | 0.944923943  | 7.42E-07  | 1.049892082  | 3.68E-08 |
| PANX1    | 0.572156316  | 2.71E-07 | 0.41287399   | 0.0002011 | 0.641937789  | 6.78E-09 |

|          |              |          |              |           |              |          |
|----------|--------------|----------|--------------|-----------|--------------|----------|
| RDH10    | 0.903395368  | 2.92E-07 | 0.918421962  | 1.83E-07  | 1.240904457  | 1.78E-12 |
| GTPBP2   | 0.575464255  | 2.94E-07 | 0.46704615   | 3.10E-05  | 0.81512097   | 2.63E-13 |
| ZNF766   | -0.526620197 | 3.23E-07 | -0.152099941 | 0.1299776 | -0.317348528 | 0.001714 |
| CXCL11   | 5.722261787  | 3.29E-07 | 4.838381784  | 1.85E-05  | 5.479202179  | 1.05E-06 |
| ETAA1    | -0.657238162 | 3.36E-07 | 0.020132323  | 0.8720049 | -0.285082317 | 0.024078 |
| DBF4     | -0.591464827 | 3.45E-07 | -0.299862349 | 0.0088777 | -0.264338741 | 0.021248 |
| TRIM47   | 1.680509902  | 3.45E-07 | 1.348835343  | 4.11E-05  | 1.234699242  | 0.000188 |
| EGR1     | 1.330791409  | 3.56E-07 | 0.995296206  | 0.0001412 | 0.891069382  | 0.000662 |
| PPP2CB   | 0.473796803  | 3.58E-07 | 0.342302414  | 0.0002333 | 0.271286697  | 0.003609 |
| DUSP10   | 0.897423832  | 3.59E-07 | 0.741769928  | 2.46E-05  | 0.931084417  | 1.13E-07 |
| MAPK6    | 0.426010333  | 3.60E-07 | 0.354787006  | 2.19E-05  | 0.558950619  | 2.18E-11 |
| NMNAT2   | 1.859408589  | 3.81E-07 | 1.449724432  | 7.85E-05  | 1.894071176  | 2.16E-07 |
| DENND4A  | 0.752253966  | 3.83E-07 | 0.529649289  | 0.0003487 | 0.94623131   | 1.56E-10 |
| SAC3D1   | -2.114226336 | 3.99E-07 | -0.557240975 | 0.1495915 | -0.722900914 | 0.063599 |
| SPIDR    | -0.61576584  | 4.26E-07 | -0.448393014 | 0.0002339 | -0.46277113  | 0.00014  |
| C5orf45  | 0.708451767  | 4.27E-07 | 0.683451222  | 9.53E-07  | 0.586636279  | 2.77E-05 |
| NEDD9    | 1.152209049  | 4.31E-07 | 1.041572179  | 4.84E-06  | 1.620205707  | 1.09E-12 |
| C2CD4B   | 2.151849374  | 4.65E-07 | 1.447759753  | 0.0007571 | 2.47479122   | 5.68E-09 |
| NCEH1    | 1.098277895  | 4.76E-07 | 0.840640885  | 0.0001191 | 1.265996913  | 6.34E-09 |
| MYCN     | -1.784631558 | 5.03E-07 | -1.276923096 | 0.0002201 | -2.131101896 | 2.82E-09 |
| SERPINB8 | 1.22442184   | 5.12E-07 | 0.981958127  | 5.69E-05  | 1.352435815  | 2.84E-08 |
| PATZ1    | -0.568162239 | 5.27E-07 | -0.58581544  | 1.55E-07  | -0.788620952 | 3.44E-12 |
| CDK17    | 0.695045642  | 5.58E-07 | 0.543480324  | 8.49E-05  | 0.524612201  | 0.00015  |
| FRMD8    | 1.063175104  | 5.60E-07 | 0.630107715  | 0.0030484 | 1.027485923  | 1.28E-06 |
| LRG1     | 1.157162351  | 5.69E-07 | 0.517318757  | 0.0256991 | 0.981092876  | 2.25E-05 |
| S100A3   | 2.604319402  | 5.71E-07 | 2.501505348  | 1.44E-06  | 3.023891799  | 4.21E-09 |
| NAMPTL   | 1.793967566  | 5.74E-07 | 1.881580045  | 1.55E-07  | 2.387956768  | 2.72E-11 |
| BCAR1    | 0.848444237  | 6.05E-07 | 0.633911566  | 0.0001948 | 0.856519418  | 4.73E-07 |
| ZSCAN20  | -0.70081908  | 6.24E-07 | -0.512397505 | 0.0001137 | -0.757873842 | 3.20E-08 |
| C17orf80 | -0.540339135 | 6.28E-07 | -0.398706878 | 0.0002194 | -0.622552246 | 1.02E-08 |
| PLEKHA4  | 1.049647449  | 6.65E-07 | 0.582760567  | 0.0059292 | 0.612614823  | 0.0038   |
| ELF3     | 1.057401973  | 6.70E-07 | 0.722523413  | 0.0006856 | 1.592869215  | 6.85E-14 |
| RAP1B    | 0.418711202  | 6.71E-07 | 0.510589956  | 1.22E-09  | 0.593676315  | 1.58E-12 |
| CYLD     | 0.661873488  | 6.84E-07 | 0.599037668  | 6.46E-06  | 0.648540368  | 1.07E-06 |
| LAMB3    | 0.963589844  | 6.91E-07 | 0.53679573   | 0.0056951 | 1.157900506  | 2.42E-09 |
| ZNF429   | -0.632636302 | 7.56E-07 | -0.531802134 | 2.45E-05  | -0.509943863 | 5.06E-05 |
| CSRNP1   | 1.229016206  | 7.72E-07 | 0.855385291  | 0.0005867 | 1.537132028  | 5.95E-10 |
| DCBLD1   | -0.730166756 | 8.07E-07 | -0.378577232 | 0.0093355 | -0.131036384 | 0.366396 |
| FANCF    | -0.615975654 | 8.38E-07 | -0.26778872  | 0.0259909 | -0.543853688 | 9.99E-06 |
| ZNF530   | -0.783813335 | 8.44E-07 | -0.706113867 | 4.55E-06  | -0.863998954 | 3.10E-08 |
| GPAM     | -0.605166562 | 9.21E-07 | -0.473047922 | 0.000102  | -0.682413396 | 2.89E-08 |
| BCL9L    | 1.261461903  | 9.47E-07 | 0.67747308   | 0.0086534 | 0.805959747  | 0.001761 |
| NONOP2   | 1.389766752  | 1.04E-06 | 0.993517885  | 0.0005373 | 1.309582088  | 3.92E-06 |
| PTPRH    | 1.094784847  | 1.09E-06 | 0.397175397  | 0.0775974 | 1.082951069  | 1.40E-06 |
| RASGRP1  | 1.463668467  | 1.10E-06 | 1.504507172  | 5.15E-07  | 2.055818961  | 6.04E-12 |
| UBE2Z    | 0.392512562  | 1.15E-06 | 0.151281865  | 0.0611351 | 0.27414719   | 0.00067  |
| OSBPL7   | -1.13128222  | 1.16E-06 | -1.267797362 | 5.30E-08  | -1.013024942 | 1.24E-05 |



|            |              |          |              |           |              |          |
|------------|--------------|----------|--------------|-----------|--------------|----------|
| PIEZO1     | 0.975993628  | 1.18E-06 | 0.791433153  | 8.09E-05  | 0.985505825  | 9.16E-07 |
| EFNA1      | 1.666268401  | 1.18E-06 | 1.980098845  | 7.41E-09  | 2.805211324  | 2.41E-16 |
| MTERF      | -0.604735974 | 1.24E-06 | -0.46598041  | 0.0001462 | -0.652273198 | 1.53E-07 |
| MAGOHB     | -0.617957651 | 1.30E-06 | -0.16682776  | 0.1800623 | -0.186932183 | 0.135328 |
| ACKR3      | 1.027456081  | 1.35E-06 | 0.98339255   | 3.69E-06  | 1.256001199  | 3.22E-09 |
| HELB       | 0.687852864  | 1.52E-06 | 0.657380299  | 3.86E-06  | 0.917023829  | 1.16E-10 |
| SYS1       | 0.596501017  | 1.54E-06 | 0.399326183  | 0.0012772 | 0.698886429  | 1.56E-08 |
| PI3        | 4.225509644  | 1.56E-06 | 4.92734322   | 1.66E-08  | 4.910768884  | 1.90E-08 |
| IMP3       | -0.551758308 | 1.61E-06 | -0.347898364 | 0.0021128 | -0.338127603 | 0.002873 |
| SELE       | 6.222952591  | 1.62E-06 | 6.505165397  | 5.31E-07  | 8.076180689  | 4.62E-10 |
| RWDD2A     | -0.752703538 | 1.70E-06 | -0.516446422 | 0.0006389 | -0.409479014 | 0.006746 |
| PML        | 0.84108132   | 1.72E-06 | 0.558448457  | 0.001501  | 0.579641376  | 0.000988 |
| GADD45G    | 1.809134361  | 1.78E-06 | 0.865684398  | 0.0263072 | 1.73967632   | 4.23E-06 |
| CCDC38     | -2.602234649 | 1.83E-06 | -0.206586748 | 0.6652521 | -0.457936907 | 0.349823 |
| SLC31A2    | 1.136162338  | 1.84E-06 | 0.895189926  | 0.0001706 | 1.062417576  | 7.25E-06 |
| BCL2L15    | 1.916282768  | 1.87E-06 | 1.068310497  | 0.0079285 | 2.413835456  | 1.84E-09 |
| ZNF189     | 0.564542189  | 1.99E-06 | 0.431067421  | 0.0002769 | 0.565487408  | 1.82E-06 |
| ZBTB14     | -2.188054804 | 2.01E-06 | -0.480389719 | 0.2258254 | -0.708076983 | 0.075827 |
| UGCG       | 0.90210073   | 2.23E-06 | 0.757728288  | 7.03E-05  | 0.952002152  | 5.85E-07 |
| GRINA      | 0.620048177  | 2.43E-06 | 0.224566758  | 0.0884707 | 0.092940112  | 0.481737 |
| NCR3LG1    | 0.822014913  | 2.47E-06 | 0.881895746  | 4.05E-07  | 0.972941674  | 2.23E-08 |
| OSGEP      | -0.469300411 | 2.51E-06 | -0.034210583 | 0.7242071 | -0.166363966 | 0.08975  |
| ZBTB24     | -0.624317323 | 2.62E-06 | -0.518976615 | 7.87E-05  | -0.780789202 | 4.29E-09 |
| SLC12A7    | 1.34598807   | 2.78E-06 | 0.796342953  | 0.0056333 | 1.145861185  | 6.72E-05 |
| ZNF550     | -0.661046212 | 2.89E-06 | -0.438583991 | 0.0013971 | -0.510199787 | 0.000239 |
| NXT2       | 0.534354501  | 2.97E-06 | 0.531790026  | 2.58E-06  | 0.720076081  | 1.70E-10 |
| NUDT21     | -0.308728993 | 3.00E-06 | -0.151226616 | 0.0212418 | -0.172313467 | 0.008921 |
| LIMK2      | -0.53530805  | 3.25E-06 | -0.393477167 | 0.0005865 | -0.089047529 | 0.435051 |
| OPTN       | 0.748474565  | 3.28E-06 | 0.517427094  | 0.0012944 | 0.542604433  | 0.000743 |
| ARHGEF2    | 0.58200651   | 3.30E-06 | 0.477353742  | 0.0001331 | 0.50728621   | 4.97E-05 |
| SLC25A38   | -0.506590098 | 3.46E-06 | -0.502973042 | 3.10E-06  | -0.586552124 | 7.06E-08 |
| FTSJ2      | -0.581007299 | 3.57E-06 | -0.630561619 | 3.78E-07  | -0.675110901 | 6.67E-08 |
| PARP8      | 0.591247803  | 3.69E-06 | 0.622883999  | 9.40E-07  | 0.659203894  | 2.22E-07 |
| KDM6B      | 1.087005472  | 3.72E-06 | 0.610214713  | 0.0097138 | 0.635874165  | 0.006852 |
| LRIG3      | 0.5319574    | 3.81E-06 | 0.128754975  | 0.2636178 | 0.351625921  | 0.002255 |
| RTKN       | 0.533550977  | 3.82E-06 | 0.340952258  | 0.0031416 | 0.344504114  | 0.002885 |
| VPS37B     | 0.621126937  | 3.89E-06 | 0.269773282  | 0.0453546 | 0.61785322   | 4.29E-06 |
| SH3BP2     | 0.770032226  | 3.96E-06 | 0.468715728  | 0.0049952 | 0.609364496  | 0.000262 |
| SOX2       | -1.454922717 | 4.03E-06 | -1.737682038 | 3.73E-08  | -1.227196716 | 9.52E-05 |
| RAD17P1    | -1.770969971 | 4.08E-06 | -1.645630934 | 6.63E-06  | -0.845767598 | 0.012219 |
| DSE        | 0.98080748   | 4.18E-06 | 0.877764913  | 3.77E-05  | 1.201955329  | 1.63E-08 |
| ZNF398     | -0.536053712 | 4.20E-06 | -0.435773907 | 0.0001622 | -0.588243134 | 4.45E-07 |
| TTC13      | -0.781162557 | 4.46E-06 | -0.295750235 | 0.0790029 | -0.344928391 | 0.040362 |
| USP25      | -0.562098196 | 4.54E-06 | -0.214207154 | 0.0788997 | 0.06351728   | 0.601508 |
| ZNF197     | -0.398591398 | 4.65E-06 | -0.209866222 | 0.0113534 | -0.31783379  | 0.000186 |
| CSNK1E     | 0.399673535  | 4.69E-06 | 0.343346148  | 8.03E-05  | 0.295489724  | 0.000697 |
| P11-745A24 | 1.53556437   | 4.70E-06 | 1.090409207  | 0.0013037 | 1.718951323  | 1.99E-07 |

|           |              |          |              |           |              |          |
|-----------|--------------|----------|--------------|-----------|--------------|----------|
| CIPC      | -0.425080276 | 4.81E-06 | -0.543307205 | 4.42E-09  | -0.574346558 | 6.73E-10 |
| TNIP3     | 1.976863968  | 5.03E-06 | 1.946684988  | 6.01E-06  | 2.357891385  | 4.26E-08 |
| TFE3      | 0.656237073  | 5.06E-06 | 0.493285612  | 0.0006113 | 0.773544441  | 6.98E-08 |
| PLK3      | 0.949667402  | 5.10E-06 | 0.678534125  | 0.0011277 | 1.075838366  | 2.23E-07 |
| FRMD4B    | 0.830378789  | 5.29E-06 | 0.322839286  | 0.077811  | 0.788445242  | 1.50E-05 |
| VANGL1    | -0.637491104 | 5.28E-06 | -0.52598539  | 0.0001609 | -0.413946791 | 0.002896 |
| FARP2     | 0.55512736   | 5.35E-06 | 0.237190505  | 0.0518624 | 0.278457318  | 0.022384 |
| TNFRSF10C | 0.852242812  | 5.37E-06 | 0.702125843  | 0.0001773 | 0.984563909  | 1.44E-07 |
| CRIM1     | 0.620168563  | 5.41E-06 | 0.455979632  | 0.0008125 | 0.260759573  | 0.056292 |
| HMGCS1    | 0.8511569    | 5.77E-06 | 0.698806074  | 0.0001968 | 1.146951332  | 9.90E-10 |
| N4BP3     | 1.123771154  | 5.76E-06 | 0.957880997  | 0.0001068 | 1.828515904  | 4.79E-14 |
| PTGS2     | 2.647852273  | 6.04E-06 | 1.834978401  | 0.0017174 | 2.946723485  | 4.74E-07 |
| TMCC3     | 1.065224814  | 6.03E-06 | 0.46799374   | 0.0475162 | 1.494676322  | 1.64E-10 |
| VNN1      | 1.666100907  | 6.03E-06 | 1.784834396  | 1.02E-06  | 1.617919591  | 1.06E-05 |
| BIRC2     | 0.614889607  | 6.26E-06 | 0.643588761  | 2.18E-06  | 0.772131806  | 1.32E-08 |
| RIPK4     | 0.813900284  | 6.43E-06 | 0.876625801  | 1.03E-06  | 1.219817572  | 8.82E-12 |
| ARID5A    | 1.028481903  | 6.52E-06 | 0.552488636  | 0.0161417 | 1.241782012  | 4.11E-08 |
| GCH1      | 2.04218145   | 6.57E-06 | 1.513593519  | 0.0008423 | 2.273249361  | 5.16E-07 |
| KIAA1586  | -0.596341126 | 6.59E-06 | -0.165493272 | 0.2007274 | -0.442418844 | 0.000763 |
| ZNF92     | -0.501146476 | 6.60E-06 | -0.42962164  | 9.66E-05  | -0.499033025 | 6.46E-06 |
| PDP1      | 0.678742114  | 7.16E-06 | 0.682044753  | 6.26E-06  | 0.837388263  | 2.90E-08 |
| N4BP1     | 0.435981067  | 8.61E-06 | 0.221526248  | 0.0239543 | 0.598815422  | 8.49E-10 |
| CA5B      | 0.991008147  | 8.75E-06 | 0.823614351  | 0.0002228 | 1.400870155  | 3.08E-10 |
| TBCA      | -0.445822351 | 8.75E-06 | -0.352217756 | 0.0003856 | -0.135518448 | 0.171478 |
| CCDC85A   | 1.820847961  | 8.80E-06 | 1.795624625  | 1.10E-05  | 1.786675564  | 1.25E-05 |
| EHD4      | 0.494230224  | 8.89E-06 | 0.335215849  | 0.0025184 | 0.313182547  | 0.004837 |
| ZNF232    | -0.617858243 | 9.01E-06 | -0.480048829 | 0.0004388 | -0.197921525 | 0.14763  |
| KATNBL1   | 0.758819226  | 9.41E-06 | 0.445288449  | 0.009351  | 0.698148428  | 4.57E-05 |
| ZKSCAN4   | -0.719796813 | 9.59E-06 | -0.568908573 | 0.0002552 | -0.940982255 | 1.04E-08 |
| CASP8AP2  | -0.428794543 | 9.71E-06 | -0.376661215 | 8.79E-05  | -0.470378185 | 1.10E-06 |
| RAB20     | -1.02066793  | 1.02E-05 | -0.999920646 | 1.13E-05  | -0.546102216 | 0.014644 |
| TP53INP2  | 1.161403369  | 1.04E-05 | 0.785196235  | 0.0029975 | 0.64267921   | 0.015497 |
| SESN1     | -0.882667731 | 1.05E-05 | -1.017061435 | 3.55E-07  | -1.108956187 | 3.07E-08 |
| ACOX1     | 0.523716598  | 1.05E-05 | 0.266748421  | 0.0247318 | 0.562741053  | 2.14E-06 |
| CLCF1     | 0.889938038  | 1.06E-05 | 0.270592398  | 0.1914816 | 0.629876719  | 0.001865 |
| C9orf69   | -0.512830808 | 1.06E-05 | -0.509666026 | 9.61E-06  | -0.396129986 | 0.000575 |
| CPEB4     | 0.716336992  | 1.08E-05 | 0.264971666  | 0.1042853 | 0.752806753  | 3.65E-06 |
| KDELC1P1  | 1.411831082  | 1.08E-05 | 1.336715168  | 2.81E-05  | 1.730619793  | 4.58E-08 |
| IRF6      | 0.770042641  | 1.08E-05 | 0.313039524  | 0.0738724 | 0.713726625  | 4.46E-05 |
| CDC42EP1  | 0.859195127  | 1.10E-05 | 0.539512869  | 0.0057911 | 0.924115381  | 2.23E-06 |
| FOXO1     | 0.865587164  | 1.11E-05 | 0.787968399  | 6.21E-05  | 0.939075565  | 1.80E-06 |
| MBLAC2    | -0.709292198 | 1.12E-05 | -0.339066785 | 0.0293328 | -0.428107503 | 0.00646  |
| ZFP36L1   | 0.603325364  | 1.12E-05 | 0.321962583  | 0.0191086 | 0.441692788  | 0.001303 |
| DDI2      | -0.551249168 | 1.14E-05 | -0.415798085 | 0.0008698 | -0.465828913 | 0.000197 |
| OAF       | 0.59184808   | 1.16E-05 | 0.720348169  | 7.61E-08  | 0.589949739  | 1.18E-05 |
| EDN1      | 1.151218842  | 1.19E-05 | 0.643417572  | 0.0147015 | 1.46332597   | 2.24E-08 |
| MED15     | 0.706769956  | 1.33E-05 | 0.560934759  | 0.0005469 | 0.555992663  | 0.000612 |

|          |              |          |              |           |              |          |
|----------|--------------|----------|--------------|-----------|--------------|----------|
| DNAAF2   | -0.612653206 | 1.33E-05 | -0.424880764 | 0.0018722 | -0.474508962 | 0.000576 |
| RPL15P3  | 11.39284259  | 1.34E-05 | 0.100019845  | 0.9715913 | 7.130397975  | 0.006522 |
| FZD7     | 0.704339369  | 1.40E-05 | 0.500388734  | 0.002027  | 0.565760701  | 0.000485 |
| HIF1A    | 0.59725814   | 1.40E-05 | 0.86389935   | 3.25E-10  | 0.884124811  | 1.24E-10 |
| RNF168   | -0.42808997  | 1.40E-05 | -0.596948291 | 1.23E-09  | -0.34885524  | 0.000382 |
| TRAF1    | 1.535126745  | 1.41E-05 | 1.526412383  | 1.46E-05  | 2.023773438  | 7.76E-09 |
| NEK2     | -0.884384468 | 1.44E-05 | -0.275712081 | 0.1683666 | -0.394763333 | 0.049263 |
| ACAA1    | -0.592583019 | 1.48E-05 | -0.378297449 | 0.0053504 | -0.340283265 | 0.012355 |
| PSMD4    | -0.412601112 | 1.50E-05 | -0.210193343 | 0.0265401 | -0.270181599 | 0.0044   |
| PPP1R3C  | -1.610453779 | 1.53E-05 | -1.364526872 | 0.0002184 | -1.301182802 | 0.000426 |
| ALPK3    | 0.7902101    | 1.54E-05 | 0.207029813  | 0.25849   | 0.373196854  | 0.041455 |
| RFFL     | 0.53103616   | 1.56E-05 | 0.192484661  | 0.1177499 | 0.58199364   | 2.09E-06 |
| GPATCH11 | -0.501478929 | 1.58E-05 | -0.362996312 | 0.0014487 | -0.311948116 | 0.006373 |
| JAK1     | 0.506751353  | 1.64E-05 | 0.388770083  | 0.0009416 | 0.616046841  | 1.58E-07 |
| JUNB     | 1.46027644   | 1.66E-05 | 1.485901577  | 1.16E-05  | 2.07570429   | 8.87E-10 |
| PNRC1    | 0.565340627  | 1.66E-05 | 0.428669158  | 0.0010882 | 0.707520464  | 6.85E-08 |
| ABCF1    | 0.462975225  | 1.67E-05 | 0.179575128  | 0.0951255 | 0.380202788  | 0.000406 |
| PPCS     | -0.509123356 | 1.69E-05 | -0.343922859 | 0.0034037 | -0.235297204 | 0.044691 |
| VRK2     | 0.503091807  | 1.72E-05 | 0.32880892   | 0.0048521 | 0.686580362  | 3.19E-09 |
| UBE2Q2   | -0.556608911 | 1.90E-05 | -0.08806811  | 0.4937567 | -0.306902333 | 0.017747 |
| TATDN2   | 0.674082072  | 1.98E-05 | 0.586666277  | 0.0002018 | 0.570330814  | 0.000295 |
| TGDS     | -0.549169193 | 1.98E-05 | -0.385938753 | 0.0021833 | -0.214707208 | 0.087482 |
| TRIM68   | -0.621528313 | 2.05E-05 | -0.412811697 | 0.0040617 | -0.828615496 | 1.74E-08 |
| ZSCAN12  | -0.479618026 | 2.07E-05 | -0.275122951 | 0.0124779 | -0.352379543 | 0.001511 |
| RIMBP3C  | -0.658281871 | 2.07E-05 | -0.402567864 | 0.0092187 | -0.190644162 | 0.217517 |
| SASS6    | -0.736965651 | 2.13E-05 | -0.467368158 | 0.0063772 | -0.485010315 | 0.00474  |
| IRAK3    | 1.874468484  | 2.23E-05 | 1.860964779  | 2.48E-05  | 2.963384804  | 1.52E-11 |
| PIK3R1   | -0.616279207 | 2.25E-05 | -0.416766056 | 0.0040761 | -0.629945862 | 1.45E-05 |
| ZMYM5    | -0.49427064  | 2.26E-05 | -0.364236488 | 0.0014814 | -0.254021346 | 0.027036 |
| ZNF480   | -0.562421743 | 2.28E-05 | -0.357706319 | 0.0066738 | -0.577515787 | 1.27E-05 |
| KIF18A   | -0.569361548 | 2.34E-05 | -0.128064663 | 0.3336617 | -0.438513719 | 0.001041 |
| SRP9P1   | 9.110520817  | 2.38E-05 | 7.854429033  | 0.0002723 | 8.034190088  | 0.000196 |
| CTNNB1   | 0.402736685  | 2.39E-05 | 0.379988809  | 6.68E-05  | 0.291094436  | 0.002261 |
| GATSL3   | 1.227875218  | 2.40E-05 | -0.245504794 | 0.4100734 | 0.675489189  | 0.020391 |
| EBI3     | 1.876634636  | 2.43E-05 | 1.650283279  | 0.0002165 | 1.651816884  | 0.000216 |
| ZNF107   | -0.726851504 | 2.43E-05 | -0.409311812 | 0.0153271 | -0.35029383  | 0.037757 |
| TBC1D24  | -0.632373537 | 2.47E-05 | -0.456465358 | 0.0020137 | -0.462344706 | 0.001891 |
| ASF1A    | -0.470342602 | 2.49E-05 | -0.308875504 | 0.0047965 | -0.585739162 | 1.54E-07 |
| CCDC8    | -0.587423376 | 2.52E-05 | -0.540026009 | 9.91E-05  | -0.624994204 | 7.08E-06 |
| ANKK1    | 2.924847325  | 2.60E-05 | 2.405692567  | 0.0005513 | 2.698065081  | 9.86E-05 |
| DKK1     | -1.890515494 | 2.61E-05 | -0.930089243 | 0.0358382 | -1.300938528 | 0.003439 |
| STK40    | 0.49249537   | 2.61E-05 | 0.277930049  | 0.0176356 | 0.413134106  | 0.000413 |
| ZNF57    | -1.087387596 | 2.61E-05 | -0.94520253  | 0.0001973 | -1.001890133 | 9.20E-05 |
| ZNF730   | -0.631446801 | 2.61E-05 | -0.094001273 | 0.5135779 | -0.48206762  | 0.001134 |
| CYP27C1  | 1.130368129  | 2.65E-05 | 0.857404332  | 0.0014506 | 0.9650628    | 0.000338 |
| MSANTD4  | -0.560747101 | 2.65E-05 | -0.364448572 | 0.0056582 | -0.71552515  | 7.80E-08 |
| SBNO2    | 1.215267519  | 2.73E-05 | 1.380396156  | 1.83E-06  | 1.285503885  | 8.83E-06 |

|             |              |          |              |           |              |          |
|-------------|--------------|----------|--------------|-----------|--------------|----------|
| AP4B1       | 0.832482343  | 2.78E-05 | 0.807013336  | 4.69E-05  | 1.209631699  | 8.75E-10 |
| ZFP36L2     | -0.744388441 | 2.82E-05 | -0.670118213 | 0.0001557 | -0.9728231   | 4.56E-08 |
| RAPGEF3     | 1.287677369  | 2.85E-05 | 0.118928219  | 0.7050632 | 0.981413601  | 0.001491 |
| FBXO45      | -0.380592387 | 2.87E-05 | -0.232046938 | 0.0093841 | -0.183995617 | 0.039882 |
| CSF2        | 5.056552137  | 3.06E-05 | 5.859198776  | 1.21E-06  | 6.623712364  | 3.86E-08 |
| KIAA1217    | 0.762639118  | 3.05E-05 | 0.234039206  | 0.2010952 | 0.706299746  | 0.000113 |
| B3GNT1      | -0.55316625  | 3.16E-05 | -0.434304646 | 0.0008059 | -0.781972628 | 5.18E-09 |
| FAIM3       | 1.965773595  | 3.26E-05 | 1.435101524  | 0.0027463 | 2.097613536  | 8.11E-06 |
| VCAM1       | 2.587062563  | 3.29E-05 | 2.70994123   | 1.36E-05  | 2.819205846  | 6.01E-06 |
| GLRX2       | -0.70547441  | 3.31E-05 | -0.34471178  | 0.0316959 | -0.257375084 | 0.109505 |
| ARIH2       | 0.345953887  | 3.33E-05 | 0.301265101  | 0.0002825 | 0.395759142  | 1.84E-06 |
| ZNF224      | -0.466171229 | 3.34E-05 | -0.179133501 | 0.1048965 | -0.496031128 | 9.94E-06 |
| RRP1        | 0.593085006  | 3.38E-05 | 0.412939712  | 0.0038475 | 0.835518045  | 4.40E-09 |
| SNRPP1      | 5.697105126  | 3.40E-05 | 6.346452201  | 3.62E-06  | 5.955628464  | 1.42E-05 |
| UQCR11      | 0.480197555  | 3.40E-05 | 0.14274857   | 0.2179712 | 0.313649778  | 0.006745 |
| PGBD2       | -0.745057192 | 3.42E-05 | -0.453340457 | 0.0095414 | -0.633543074 | 0.000354 |
| LIAS        | -0.700103365 | 3.46E-05 | -0.374090058 | 0.0222287 | -0.702500804 | 3.18E-05 |
| PRR15L      | -1.508576013 | 3.57E-05 | -1.093314984 | 0.0026568 | -0.901409647 | 0.013202 |
| MAPKAPK2    | 0.30644473   | 3.74E-05 | 0.219731353  | 0.0029909 | 0.257261651  | 0.000515 |
| TP53        | 0.984178985  | 3.81E-05 | 1.03811617   | 1.35E-05  | 1.146638687  | 1.54E-06 |
| ZNF816      | -0.801447004 | 3.87E-05 | -1.052447604 | 7.63E-08  | -1.031085548 | 1.46E-07 |
| C12orf29    | 0.486968615  | 3.89E-05 | 0.400531185  | 0.0006851 | 0.650694422  | 3.28E-08 |
| MRPS31P4    | -1.081802688 | 3.91E-05 | -0.10927649  | 0.6472265 | -0.295201753 | 0.224402 |
| CTB-50E14.1 | 0.962822953  | 3.92E-05 | 0.470650688  | 0.0468303 | 0.880524979  | 0.000164 |
| EGR3        | 2.168300097  | 3.94E-05 | 1.395103084  | 0.0084507 | 1.828798487  | 0.000531 |
| GATA6       | -0.87932755  | 3.98E-05 | -0.995731462 | 3.21E-06  | -1.047753976 | 9.75E-07 |
| ZNF606      | -0.618694356 | 4.01E-05 | -0.289480958 | 0.0497188 | -0.611123907 | 4.49E-05 |
| SAP30L      | -0.799226008 | 4.02E-05 | -0.194335246 | 0.3149689 | -0.293274902 | 0.130489 |
| AC024592.1  | 5.265116192  | 4.14E-05 | 6.117733319  | 1.87E-06  | 3.887745375  | 0.002541 |
| DEDD2       | 0.711302868  | 4.15E-05 | 0.596688953  | 0.000562  | 0.971873897  | 1.62E-08 |
| FGFR3       | -0.697439913 | 4.14E-05 | -0.701738703 | 3.57E-05  | -0.770605286 | 5.77E-06 |
| SERTAD2     | 0.707682688  | 4.14E-05 | 0.244361386  | 0.1580531 | 0.760458229  | 1.00E-05 |
| SKIV2L2     | -0.327708072 | 4.14E-05 | -0.113916861 | 0.1509436 | -0.138347535 | 0.081818 |
| GPR132      | 1.804925313  | 4.18E-05 | 1.939136287  | 7.90E-06  | 2.19541653   | 4.27E-07 |
| CREB3       | 0.410849628  | 4.25E-05 | 0.231797292  | 0.0205958 | 0.329865597  | 0.000991 |
| CD55        | 1.236832612  | 4.45E-05 | 1.115977259  | 0.0002295 | 1.66332132   | 3.92E-08 |
| ATP5H       | -0.31497533  | 4.56E-05 | -0.256098139 | 0.0008304 | -0.124996774 | 0.102386 |
| FAM213B     | 0.50204248   | 4.56E-05 | 0.167041406  | 0.1770279 | 0.365393975  | 0.003016 |
| LINC00888   | -0.542504184 | 4.55E-05 | -0.122988771 | 0.3327471 | -0.244091438 | 0.060313 |
| RHOG        | 0.456100227  | 4.63E-05 | -0.181175465 | 0.1148742 | 0.046882172  | 0.680492 |
| ZNF433      | -0.735713016 | 4.84E-05 | -0.470981048 | 0.0069957 | -0.646129926 | 0.000257 |
| COX11       | -0.373076639 | 4.93E-05 | -0.263763577 | 0.0036049 | -0.314038284 | 0.000569 |
| NADK2       | -0.40197961  | 5.02E-05 | -0.072014484 | 0.4590943 | -0.126352235 | 0.196733 |
| DAPP1       | 2.297192573  | 5.04E-05 | 2.748188051  | 1.09E-06  | 3.237940999  | 8.80E-09 |
| SNAPC3      | -0.434082031 | 5.20E-05 | -0.13983571  | 0.1870003 | -0.185664043 | 0.081561 |
| ZSWIM3      | -0.704897256 | 5.23E-05 | -0.670668982 | 6.87E-05  | -0.458398494 | 0.005844 |
| FSTL3       | 0.97137198   | 5.36E-05 | 0.362582982  | 0.1331934 | 0.851234791  | 0.000399 |

|            |              |          |              |           |              |          |
|------------|--------------|----------|--------------|-----------|--------------|----------|
| ZNF605     | -0.527998835 | 5.45E-05 | -0.471516556 | 0.0002778 | -0.479878203 | 0.000234 |
| RBAK       | -0.350048495 | 5.59E-05 | -0.216190893 | 0.0115121 | -0.295690445 | 0.000596 |
| TRIOBP     | 0.358703023  | 5.61E-05 | 0.173323985  | 0.051277  | 0.344953762  | 0.000103 |
| FAM83A     | -0.640364782 | 5.68E-05 | 0.841400195  | 1.12E-07  | 0.655058331  | 3.63E-05 |
| TMEM106A   | 2.108475374  | 5.68E-05 | 1.171157739  | 0.0275339 | 2.136560179  | 4.06E-05 |
| TC-479C5.1 | 1.062459859  | 5.77E-05 | 0.313624687  | 0.2381162 | 0.256018701  | 0.335953 |
| ZNF440     | -0.509605365 | 5.82E-05 | -0.480119624 | 0.0001372 | -0.617520909 | 1.02E-06 |
| DOLPP1     | -0.43552029  | 5.84E-05 | -0.375515106 | 0.0004306 | -0.494050088 | 4.58E-06 |
| UBE2V2     | -0.345308722 | 5.87E-05 | -0.154488393 | 0.0681051 | -0.206059405 | 0.015395 |
| AFF4       | 0.532636983  | 5.90E-05 | 0.232402602  | 0.0796104 | 0.441428529  | 0.000868 |
| CLIC4      | 0.531626251  | 5.89E-05 | 0.554373254  | 2.77E-05  | 0.680426912  | 2.67E-07 |
| TNIP2      | 0.551417645  | 6.05E-05 | 0.354789744  | 0.0098611 | 0.498669152  | 0.000264 |
| MXN1       | -1.416890555 | 6.08E-05 | -1.569947016 | 6.24E-06  | -1.6508792   | 3.14E-06 |
| SORD       | 0.819886207  | 6.25E-05 | 0.424757196  | 0.0380894 | 1.009339903  | 8.09E-07 |
| GGCT       | -0.470512137 | 6.44E-05 | -0.2825459   | 0.0146524 | -0.036878345 | 0.748636 |
| TNFRSF11E  | 1.442031464  | 6.52E-05 | 2.023161359  | 1.97E-08  | 2.027764364  | 1.84E-08 |
| AC112218.1 | 0.413503314  | 6.58E-05 | 0.109613427  | 0.2909002 | 0.262539173  | 0.011297 |
| SREK1IP1   | 0.651382672  | 6.59E-05 | 0.406096397  | 0.012556  | 0.45406583   | 0.005297 |
| BCL11B     | -1.214201559 | 6.74E-05 | -0.764411791 | 0.0103977 | -1.295473835 | 2.03E-05 |
| LYSMD4     | -0.716939894 | 6.73E-05 | -0.634054197 | 0.000364  | -0.716453891 | 6.20E-05 |
| FAM171A1   | 0.452524944  | 6.80E-05 | 0.277126874  | 0.0145006 | 0.414836593  | 0.00025  |
| STAG3L4    | 0.640329354  | 6.83E-05 | 0.326683724  | 0.0384699 | 0.272865651  | 0.088334 |
| C2ORF15    | -0.944521221 | 7.06E-05 | -0.819568722 | 0.0004497 | -0.353765854 | 0.123969 |
| RPA4       | 1.775722151  | 7.09E-05 | 2.001486296  | 4.90E-06  | 1.827884018  | 3.68E-05 |
| FAM217B    | -0.797189745 | 7.12E-05 | -1.050592273 | 1.34E-07  | -1.060485922 | 1.29E-07 |
| SPRR1B     | 3.244276858  | 7.15E-05 | 2.275544953  | 0.0060167 | 4.06063084   | 5.08E-07 |
| PCNXL3     | 0.443237959  | 7.19E-05 | -0.030863834 | 0.7830261 | 0.115891021  | 0.301278 |
| CTBP2      | 0.337236058  | 7.24E-05 | 0.209262061  | 0.0135766 | 0.276952878  | 0.001087 |
| BCL6       | 1.061517768  | 7.32E-05 | 0.587853663  | 0.0282112 | 0.998644789  | 0.000188 |
| FAM57A     | 0.471343491  | 7.36E-05 | 0.310681223  | 0.0089007 | 0.494903545  | 2.92E-05 |
| EBLN2      | 0.711195156  | 7.40E-05 | 0.661458116  | 0.0001976 | 0.810490484  | 4.83E-06 |
| PTAFR      | 1.406392449  | 7.44E-05 | 0.720076749  | 0.0429409 | 1.169560813  | 0.000991 |
| ZMYND15    | 1.745401216  | 7.47E-05 | 1.53309509   | 0.0004893 | 1.921656424  | 1.07E-05 |
| ATP1B1     | 0.669426678  | 7.65E-05 | 0.657965471  | 0.000101  | 0.507896256  | 0.002693 |
| CYP2C18    | 1.114048509  | 7.71E-05 | 0.810651749  | 0.0040165 | 1.912778197  | 9.37E-12 |
| TSEN54     | -0.444833809 | 7.84E-05 | -0.355427015 | 0.0014542 | -0.287482756 | 0.009479 |
| ZNF761     | -0.531116384 | 7.84E-05 | -0.6523526   | 1.14E-06  | -0.511899407 | 0.000132 |
| EEF1A1P5   | 0.563303042  | 7.87E-05 | 0.268520231  | 0.0598163 | 0.273485223  | 0.05525  |
| NUDT9      | -0.542037945 | 7.91E-05 | -0.360923735 | 0.0077423 | -0.430420771 | 0.001611 |
| SNPH       | 2.041931067  | 7.95E-05 | 1.04491673   | 0.0447175 | 1.682327044  | 0.001169 |
| RAB1A      | 0.345065418  | 8.11E-05 | -0.020987865 | 0.8106545 | 0.191318687  | 0.028808 |
| ZNF703     | -0.70193854  | 8.37E-05 | -1.251947796 | 5.90E-12  | -1.462329943 | 3.88E-15 |
| OAS1       | 0.708941885  | 8.40E-05 | 0.110267968  | 0.5413704 | 0.390881531  | 0.030257 |
| TSPAN15    | 0.670245306  | 8.42E-05 | 0.278796475  | 0.1024991 | 1.117933665  | 4.76E-11 |
| ALG10B     | -0.409767467 | 8.71E-05 | -0.270551106 | 0.0088173 | -0.176243301 | 0.088699 |
| MACROD2    | 0.613885123  | 8.71E-05 | -0.04565888  | 0.7736992 | -0.086532176 | 0.58806  |
| RTF1       | 0.352676292  | 8.75E-05 | 0.027976865  | 0.7548308 | -0.017124156 | 0.848678 |

|            |              |           |              |           |              |          |
|------------|--------------|-----------|--------------|-----------|--------------|----------|
| PAPD5      | -0.451625305 | 8.79E-05  | -0.285875887 | 0.0118081 | -0.465491538 | 4.78E-05 |
| PANK1      | -0.518850383 | 8.86E-05  | -0.435166854 | 0.0008978 | -0.52329918  | 7.00E-05 |
| DNAJA3     | -0.53640172  | 9.07E-05  | -0.167406396 | 0.2161501 | -0.381035679 | 0.005213 |
| PFKFB3     | 0.852932802  | 9.23E-05  | 1.401641147  | 1.23E-10  | 1.999223851  | 4.05E-20 |
| AMOTL2     | 0.846957573  | 9.25E-05  | 0.374446164  | 0.0844629 | 0.658496217  | 0.00238  |
| SLC5A2     | 1.888006477  | 9.30E-05  | 2.17873274   | 5.68E-06  | 2.361635392  | 8.97E-07 |
| CEP76      | -0.601195167 | 9.35E-05  | -0.160400084 | 0.2865386 | -0.352930251 | 0.020836 |
| LACC1      | 0.697153893  | 9.66E-05  | 0.572579784  | 0.0013328 | 0.776964112  | 1.23E-05 |
| SF3B2      | -0.573621796 | 9.69E-05  | -0.254796003 | 0.0792412 | -0.502649669 | 0.00059  |
| ZNF112     | -0.496746611 | 9.72E-05  | -0.312686357 | 0.0114071 | -0.601403993 | 2.00E-06 |
| MDM1       | -0.880375097 | 9.99E-05  | -0.414495491 | 0.0639198 | -0.738532981 | 0.000995 |
| GEMIN6     | -0.532027076 | 0.0001002 | -0.280743109 | 0.0348391 | -0.381031766 | 0.004759 |
| BAIAP2L1   | 0.515354831  | 0.0001025 | 0.364857428  | 0.0059756 | 0.600248409  | 5.90E-06 |
| CKAP4      | 0.31780308   | 0.0001026 | 0.155878273  | 0.0564874 | 0.282978703  | 0.000533 |
| LUZP6      | 1.319060171  | 0.0001025 | 0.647612307  | 0.0604693 | 0.565637645  | 0.103762 |
| CSTF1      | -0.388058719 | 0.0001055 | -0.345497018 | 0.0005129 | -0.364237077 | 0.000267 |
| ST5        | 0.614007116  | 0.0001053 | 0.465830352  | 0.0032141 | 0.407182598  | 0.010123 |
| TMEM165    | 0.456402148  | 0.0001057 | 0.354797772  | 0.0025406 | 0.654304954  | 2.41E-08 |
| ADAM8      | 1.111723537  | 0.0001093 | 0.414937125  | 0.1508081 | 1.064924057  | 0.000211 |
| PHIP       | -0.300449356 | 0.0001136 | -0.285809792 | 0.0002301 | -0.272521221 | 0.000451 |
| CTSS       | 0.918853593  | 0.0001154 | 0.592660545  | 0.0129208 | 1.488114571  | 3.60E-10 |
| PDE4B      | 1.595482424  | 0.000118  | 1.26318185   | 0.0023408 | 1.232827384  | 0.002929 |
| MEF2D      | 0.678690247  | 0.0001182 | 0.067686112  | 0.7020675 | 0.252581695  | 0.154979 |
| PTP4A3     | 1.225997586  | 0.0001213 | 1.155448279  | 0.0002891 | 0.914455189  | 0.004231 |
| MEGF9      | -0.384799474 | 0.0001223 | -0.16501374  | 0.0903101 | -0.278791117 | 0.00469  |
| FEM1C      | 0.542146839  | 0.0001246 | 0.300738831  | 0.0333125 | 0.632981621  | 6.99E-06 |
| FAM46C     | -1.295878508 | 0.0001251 | -1.992582552 | 4.19E-09  | -1.554873341 | 4.25E-06 |
| MYO1C      | 0.412176743  | 0.0001254 | 0.115931764  | 0.2802674 | 0.25681284   | 0.016736 |
| CENPE      | -0.861174708 | 0.0001285 | -0.281429147 | 0.2098341 | -0.559892268 | 0.012691 |
| GNPTAB     | -0.388767628 | 0.0001302 | -0.047666146 | 0.6361062 | 0.05364504   | 0.595024 |
| VPS29      | -0.340995468 | 0.0001302 | 0.036547975  | 0.6763896 | 0.107240997  | 0.220598 |
| RELT       | 0.949527936  | 0.0001309 | 0.657316495  | 0.0079959 | 0.772397945  | 0.001726 |
| TRIT1      | -0.550193066 | 0.0001311 | -0.328734044 | 0.0214084 | -0.371375816 | 0.009457 |
| P11-39K24. | 1.908327678  | 0.0001326 | 1.779738656  | 0.0003446 | 2.603792204  | 8.69E-08 |
| RNF207     | 0.6849542    | 0.0001333 | 0.78061288   | 1.21E-05  | 0.66608066   | 0.0002   |
| SRP9       | -0.230184    | 0.0001335 | -0.019628365 | 0.7431301 | -0.011942048 | 0.842127 |
| ZNF225     | -0.577774243 | 0.0001344 | -0.364432322 | 0.0132886 | -0.38321541  | 0.010056 |
| GPR108     | 0.519443693  | 0.0001358 | 0.497066793  | 0.0002573 | 0.603296642  | 9.09E-06 |
| HS3ST3B1   | 0.894041924  | 0.0001392 | 0.693532484  | 0.003097  | 0.646608139  | 0.006025 |
| WIZ        | 0.473586733  | 0.0001409 | 0.068038695  | 0.5860796 | 0.007688654  | 0.951125 |
| MAPK14     | -0.378873259 | 0.0001411 | -0.579136543 | 5.76E-09  | -0.380901164 | 0.000126 |
| FADD       | -0.381180574 | 0.0001458 | -0.351340113 | 0.0003579 | -0.428028117 | 1.75E-05 |
| UPF2       | -0.356893074 | 0.0001473 | -0.267211808 | 0.0042262 | -0.271636489 | 0.003698 |
| ATP10D     | 0.673223691  | 0.0001482 | 0.123347222  | 0.4870897 | 0.433966234  | 0.014524 |
| CMPK2      | -0.899042586 | 0.0001484 | -0.415423338 | 0.063234  | -0.298781333 | 0.185542 |
| ZNF37A     | -0.471154271 | 0.000148  | -0.087376859 | 0.4729362 | -0.540511234 | 1.22E-05 |
| B3GNT2     | 0.501352991  | 0.0001526 | 0.372917814  | 0.0047769 | 0.743871112  | 1.64E-08 |

|           |              |           |              |           |              |          |
|-----------|--------------|-----------|--------------|-----------|--------------|----------|
| CACYBP    | -0.559739936 | 0.0001535 | -0.112938642 | 0.4394741 | -0.011394086 | 0.937926 |
| TNKS1BP1  | 0.613162014  | 0.0001555 | 0.368404981  | 0.0230777 | 0.678806145  | 2.79E-05 |
| CAPN7     | -0.532103215 | 0.0001561 | -0.090099654 | 0.520119  | -0.215410008 | 0.124356 |
| H3F3B     | 0.384027485  | 0.000156  | 0.181543643  | 0.0736727 | 0.302226519  | 0.002906 |
| CENPC     | -0.368061998 | 0.0001569 | -0.235587075 | 0.013871  | -0.31381673  | 0.001143 |
| RNF44     | 0.560881345  | 0.0001576 | -0.14301889  | 0.3409135 | -0.204366903 | 0.175173 |
| TAP1      | 0.815084849  | 0.0001599 | 0.614386915  | 0.0044168 | 0.864019719  | 5.94E-05 |
| GOPC      | -0.29785012  | 0.0001602 | -0.246713596 | 0.0015822 | -0.196832509 | 0.011859 |
| RUNX1     | 0.641488836  | 0.0001605 | 0.201613091  | 0.2367342 | 0.668651089  | 8.20E-05 |
| ZNF514    | -0.500241959 | 0.0001619 | -0.173277583 | 0.1810647 | -0.244365586 | 0.061423 |
| GPR107    | 0.410526734  | 0.0001633 | -0.060194479 | 0.5816194 | 0.140486845  | 0.197662 |
| KLF3      | 0.38139209   | 0.000164  | 0.002519963  | 0.9801477 | 0.249766146  | 0.013565 |
| TD-2008A1 | 1.020233411  | 0.000166  | 0.539522789  | 0.0468507 | 1.294435368  | 1.65E-06 |
| WDR11     | 0.376743504  | 0.0001704 | 0.407811261  | 4.60E-05  | 0.533344569  | 9.58E-08 |
| FEZ1      | 1.05811239   | 0.0001709 | 0.645466231  | 0.0218743 | 0.897163291  | 0.001456 |
| INO80C    | 0.633356616  | 0.0001713 | 0.770940484  | 4.19E-06  | 0.872176441  | 1.92E-07 |
| TTC30B    | -0.64820183  | 0.0001714 | -0.81910583  | 1.83E-06  | -0.761950432 | 9.63E-06 |
| SPRY4     | 0.543194838  | 0.0001826 | 0.366130662  | 0.0116396 | 0.254504248  | 0.079775 |
| RASA1     | -0.321648721 | 0.0001874 | -0.239199127 | 0.0052862 | -0.177919264 | 0.037894 |
| TRAPPC1   | 0.383290646  | 0.0001872 | 0.005743937  | 0.9557089 | 0.056485645  | 0.586113 |
| BLNK      | 0.88643212   | 0.0001892 | 0.485383332  | 0.0412948 | 0.978920245  | 3.63E-05 |
| STAP2     | 0.59642359   | 0.0001924 | 0.261000324  | 0.1029782 | 0.671195831  | 2.58E-05 |
| CTCF      | -0.266606147 | 0.000194  | -0.298156386 | 2.77E-05  | -0.348187695 | 1.09E-06 |
| LEO1      | -0.333764623 | 0.0001943 | -0.222561082 | 0.0115125 | -0.341723019 | 0.000122 |
| SLC30A7   | 0.379054257  | 0.0001939 | 0.234646573  | 0.020772  | 0.418370064  | 3.73E-05 |
| FOSL2     | 0.842266111  | 0.000195  | 0.386859574  | 0.0872031 | 0.888468998  | 8.47E-05 |
| DBT       | -0.471571249 | 0.0001972 | -0.269336544 | 0.033305  | -0.388068633 | 0.002232 |
| MAST4     | 0.748321567  | 0.0002066 | 0.371383956  | 0.0660822 | 1.102156099  | 4.38E-08 |
| COTL1     | 0.749442021  | 0.0002085 | 0.533569536  | 0.0082731 | 0.647201201  | 0.001359 |
| PEF1      | 0.369382156  | 0.0002086 | 0.055431693  | 0.5782768 | 0.191057224  | 0.055024 |
| SLC20A1   | 0.496696682  | 0.0002115 | 0.375695403  | 0.0050454 | 0.370076587  | 0.005765 |
| ZNF138    | -0.547994019 | 0.0002114 | -0.217893281 | 0.133305  | -0.299769886 | 0.040389 |
| KIAA0391  | 0.465380227  | 0.0002172 | 0.417015915  | 0.0008614 | 0.507900182  | 5.01E-05 |
| MLX       | -0.307837076 | 0.0002173 | -0.254790982 | 0.0019323 | -0.257944625 | 0.001751 |
| ANKRD36B  | 0.675897587  | 0.0002186 | 0.679750036  | 0.0001977 | 1.028380383  | 1.59E-08 |
| FAM136A   | -0.46419771  | 0.0002189 | -0.285487624 | 0.0219794 | -0.175361764 | 0.159432 |
| CCSER2    | 0.420199074  | 0.0002225 | 0.384972635  | 0.0007044 | 0.516073935  | 5.47E-06 |
| SNX30     | -0.684247957 | 0.0002231 | -0.158419582 | 0.3914673 | -0.503434013 | 0.006614 |
| PDE8A     | 0.513147817  | 0.0002244 | 0.441307919  | 0.0014938 | 0.627331962  | 6.13E-06 |
| EGR2      | 1.309462517  | 0.0002261 | 0.941343956  | 0.0080907 | 1.136132281  | 0.00138  |
| PEX1      | -0.477754347 | 0.0002265 | -0.314898442 | 0.0137332 | -0.254516803 | 0.047383 |
| PISD      | 0.484095358  | 0.0002286 | 0.20391571   | 0.120664  | 0.494802879  | 0.00016  |
| HARS2     | -0.357988083 | 0.0002304 | -0.203898009 | 0.0319585 | -0.261608675 | 0.006319 |
| CRNKL1    | -0.440238808 | 0.000231  | -0.341705415 | 0.0040347 | -0.366393326 | 0.00211  |
| ZNF555    | -0.576257352 | 0.0002311 | -0.486233551 | 0.001554  | -0.477455395 | 0.002153 |
| LYPD6B    | 0.845254952  | 0.0002326 | 0.635562118  | 0.0056033 | 1.712859273  | 3.37E-14 |
| UBL4A     | -0.501114413 | 0.0002325 | -0.472951195 | 0.0004017 | -0.26518337  | 0.047104 |

|            |              |           |              |           |              |          |
|------------|--------------|-----------|--------------|-----------|--------------|----------|
| SLFN11     | 1.433658632  | 0.0002341 | 2.939300377  | 4.18E-14  | 2.516312474  | 1.01E-10 |
| PVRL2      | 0.433660409  | 0.0002355 | 0.262283982  | 0.026075  | 0.409542875  | 0.000505 |
| PRKD3      | 0.509802861  | 0.0002371 | 0.570638634  | 3.79E-05  | 0.769509771  | 2.70E-08 |
| BTN2A1     | 0.425449022  | 0.0002378 | 0.015358882  | 0.8946087 | 0.375550678  | 0.001127 |
| MAP10      | -0.69679068  | 0.00024   | -0.542475222 | 0.0029938 | -0.833701353 | 1.11E-05 |
| SSX2IP     | -0.42648532  | 0.0002421 | 0.019002866  | 0.8682843 | -0.4302863   | 0.000199 |
| POLG2      | -0.650296541 | 0.0002445 | -0.323682983 | 0.0541599 | -0.389132136 | 0.02303  |
| ESRP2      | -0.461547714 | 0.0002473 | -0.675167106 | 7.91E-08  | -0.425854141 | 0.000691 |
| XPO1       | -0.324701522 | 0.0002484 | 0.006345099  | 0.9428092 | -0.179796816 | 0.042252 |
| ZNF813     | -0.673895082 | 0.0002513 | -0.555833254 | 0.0023612 | -0.734090292 | 6.21E-05 |
| RASGEF1B   | 0.54072922   | 0.000256  | 0.241771139  | 0.1048534 | 0.712635908  | 1.32E-06 |
| RTKN2      | -0.626226332 | 0.0002567 | -0.229326013 | 0.1742283 | -0.28751874  | 0.088755 |
| CAMK2G     | -0.666405802 | 0.000257  | -0.441045532 | 0.0150194 | -0.617443807 | 0.000676 |
| ANKRD42    | -0.556102159 | 0.0002574 | -0.369692854 | 0.0143663 | -0.350642567 | 0.020419 |
| P11-680E19 | -1.984623833 | 0.000262  | -1.271201973 | 0.0108165 | -2.148548737 | 8.18E-05 |
| ZNF593     | 0.666101988  | 0.0002648 | 0.413504819  | 0.0236058 | 0.617331096  | 0.000699 |
| DCTN1      | 0.533202747  | 0.0002665 | 0.208270587  | 0.154414  | 0.395982996  | 0.006778 |
| AP006216.1 | -1.398019052 | 0.0002701 | -1.110813998 | 0.0034271 | -1.233485083 | 0.001211 |
| FAM203A    | -0.560117706 | 0.0002746 | -0.430098208 | 0.0044302 | -0.497825096 | 0.001093 |
| HIC2       | -0.475350098 | 0.0002817 | -0.824323374 | 3.38E-10  | -0.786385998 | 2.19E-09 |
| _RRC37A6F  | -1.369028714 | 0.0002895 | 0.007601556  | 0.9816081 | -0.054756525 | 0.87297  |
| FAM185A    | -0.668980736 | 0.00029   | -0.278617596 | 0.1232276 | -0.716333688 | 7.72E-05 |
| SOX21      | -1.301640444 | 0.0002903 | -1.803213266 | 5.63E-07  | -1.325349868 | 0.00022  |
| CCT8P1     | -0.97741627  | 0.0002931 | -0.463119288 | 0.0650165 | -0.526531403 | 0.038469 |
| AC005280.1 | -0.4068017   | 0.0002965 | -0.436969297 | 7.81E-05  | -0.561488127 | 6.12E-07 |
| ATP8B5P    | 1.736453735  | 0.0003001 | 0.76572008   | 0.1196026 | 1.030372371  | 0.035655 |
| MGAT4B     | 0.372503767  | 0.0003052 | 0.084733416  | 0.4118035 | 0.257064379  | 0.012661 |
| PRDX1      | -0.473202198 | 0.000306  | -0.180593697 | 0.1676214 | -0.075011283 | 0.566501 |
| ZSWIM6     | 0.372017328  | 0.0003065 | -0.126714809 | 0.2223017 | 0.015829106  | 0.87866  |
| KIAA0586   | -0.463282663 | 0.0003081 | -0.359709525 | 0.0045085 | -0.420906516 | 0.000948 |
| LAPTM4B    | 1.304712454  | 0.0003087 | 1.124171432  | 0.0018683 | 0.879176551  | 0.015209 |
| ZNF273     | -0.498012516 | 0.0003106 | -0.331201238 | 0.0142168 | -0.532649965 | 0.000113 |
| CROT       | -0.828809982 | 0.0003126 | -0.361757942 | 0.1111366 | -0.584713271 | 0.010655 |
| ZNF486     | -0.543359486 | 0.0003141 | -0.414251435 | 0.0055153 | -0.502797577 | 0.000791 |
| PARS2      | -0.498630594 | 0.0003162 | -0.648746705 | 2.22E-06  | -0.609622481 | 1.00E-05 |
| PLEKHG3    | 0.484357959  | 0.0003175 | 0.308777332  | 0.0216461 | 0.602832661  | 7.09E-06 |
| MAP1LC3B   | 0.627144777  | 0.0003198 | 0.516570429  | 0.0030047 | 0.730743856  | 2.65E-05 |
| SEPHS2     | -0.50639728  | 0.0003195 | -0.255447702 | 0.0659503 | -0.115526341 | 0.405204 |
| ZNF493     | -0.480483658 | 0.0003191 | -0.201495193 | 0.1268987 | -0.393036166 | 0.003151 |
| PPP2R1A    | 0.308196269  | 0.0003209 | 0.059629738  | 0.4863072 | 0.069194562  | 0.419439 |
| GATA5      | -1.6908684   | 0.0003229 | -1.225109048 | 0.0070161 | -0.969207893 | 0.031911 |
| FAM53C     | 0.449061626  | 0.0003267 | 0.128291589  | 0.3061352 | 0.163361419  | 0.192533 |
| PIM3       | 1.125785633  | 0.0003287 | 0.770497875  | 0.014002  | 1.371015104  | 1.20E-05 |
| ZNF845     | -0.654714663 | 0.0003285 | -0.569758311 | 0.0017222 | -0.416736975 | 0.021944 |
| GDF15      | 1.343379041  | 0.0003302 | 0.905999523  | 0.0154772 | 1.954681166  | 1.73E-07 |
| IKBKB      | 0.563332862  | 0.0003306 | 0.547625726  | 0.0004758 | 0.428216421  | 0.006332 |
| ZBTB41     | -0.410689033 | 0.0003362 | -0.467923077 | 4.06E-05  | -0.30202421  | 0.007997 |



|            |              |           |              |           |              |          |
|------------|--------------|-----------|--------------|-----------|--------------|----------|
| HNRNPA3    | 0.478743164  | 0.0003367 | -0.182115702 | 0.1728632 | -0.130236994 | 0.330021 |
| RPUSD2     | -0.531148787 | 0.0003445 | -0.35875913  | 0.0131218 | -0.601762498 | 4.90E-05 |
| DAGLB      | 0.436999736  | 0.000347  | 0.202255569  | 0.096905  | 0.327971722  | 0.00697  |
| ZNF184     | -0.404154915 | 0.0003466 | -0.263573481 | 0.0171458 | -0.426354026 | 0.000143 |
| WDR5B      | -0.506642612 | 0.000349  | -0.240984857 | 0.0761252 | -0.301008687 | 0.028602 |
| CDK19      | 0.349542922  | 0.0003507 | 0.263903245  | 0.0068462 | 0.15920342   | 0.104304 |
| PHC1       | 0.855395298  | 0.0003625 | 0.417611498  | 0.0819444 | 0.456916282  | 0.057034 |
| GPR180     | -0.324824806 | 0.0003638 | -0.207824825 | 0.0208363 | -0.24060736  | 0.007731 |
| CDV3       | 0.333954852  | 0.0003654 | 0.302692217  | 0.0012282 | 0.472226884  | 4.56E-07 |
| CHMP4B     | 0.281799001  | 0.000368  | 0.167481807  | 0.033561  | 0.459640829  | 4.49E-09 |
| PLEKHA7    | -0.689332182 | 0.0003785 | -0.786440264 | 4.91E-05  | -0.42017824  | 0.029748 |
| TANK       | 0.410173587  | 0.0003796 | 0.261071052  | 0.0233585 | 0.624985737  | 5.25E-08 |
| AGL        | -0.299479993 | 0.000383  | -0.149243219 | 0.0739746 | -0.134975984 | 0.106691 |
| IMMP1L     | -0.451894102 | 0.0003833 | -0.365760169 | 0.003063  | -0.669035668 | 1.71E-07 |
| MARS       | 0.452688889  | 0.0003826 | 0.309206613  | 0.0150317 | 0.385105956  | 0.002447 |
| OSMR       | 0.864458016  | 0.000383  | 0.75787929   | 0.0018414 | 1.190806989  | 9.74E-07 |
| PSMD1      | 1.039881904  | 0.0003842 | 0.659133374  | 0.0240254 | 0.857791116  | 0.003316 |
| TNFAIP1    | 0.476449653  | 0.000385  | 0.434975623  | 0.0011754 | 0.562254975  | 2.70E-05 |
| TGIF1      | 0.431630958  | 0.0003885 | -0.143740435 | 0.2389811 | 0.107271583  | 0.378443 |
| CLDN12     | 0.463452802  | 0.0003926 | 0.25710986   | 0.0492679 | 0.604465622  | 3.56E-06 |
| NDUFV2     | 0.422497589  | 0.0003921 | 0.404780954  | 0.00066   | 0.607816938  | 3.08E-07 |
| MAL2       | 2.90596238   | 0.0003932 | 2.467252461  | 0.0026366 | 2.539088779  | 0.001964 |
| LSM3       | -0.417539922 | 0.0003968 | 0.053998455  | 0.6414212 | -0.078884304 | 0.498234 |
| CCDC138    | -0.516299018 | 0.0003975 | -0.329380248 | 0.0214789 | -0.410642002 | 0.004322 |
| RPUSD3     | -0.312747714 | 0.0003995 | -0.206350084 | 0.0159352 | -0.30041873  | 0.000585 |
| N6AMT1     | -0.503828924 | 0.0004047 | -0.502996932 | 0.0003248 | -0.579052082 | 4.59E-05 |
| PTBP3      | 0.477295492  | 0.0004137 | 0.148097459  | 0.2731017 | 0.357375654  | 0.008159 |
| ISCA1      | -0.415623507 | 0.0004154 | -0.207557282 | 0.0745472 | -0.353405305 | 0.002544 |
| PEA15      | 0.460831423  | 0.0004149 | 0.320668594  | 0.0138375 | 0.564283101  | 1.46E-05 |
| ADM        | 1.277788895  | 0.0004215 | 1.498099737  | 3.42E-05  | 2.396673946  | 2.92E-11 |
| RSBN1L     | -0.510296113 | 0.0004264 | -0.451262162 | 0.0017118 | -0.374577254 | 0.00946  |
| CLDN4      | 0.640657268  | 0.0004297 | -0.011768925 | 0.9484714 | 0.647551728  | 0.000371 |
| WIBG       | -0.329277747 | 0.0004297 | -0.391837451 | 2.36E-05  | -0.413086058 | 9.81E-06 |
| PPRC1      | 0.468022784  | 0.0004356 | -0.13130218  | 0.3250806 | 0.053515639  | 0.688182 |
| ZNF724P    | -0.470712462 | 0.0004352 | -0.278229079 | 0.0350263 | -0.635730125 | 1.98E-06 |
| P11-761N21 | 20.27289824  | 0.0004393 | 18.99546353  | 0.0009896 | -20.2031057  | 0.000561 |
| CWF19L2    | -0.37090818  | 0.0004424 | -0.22727168  | 0.0277734 | -0.276714133 | 0.007854 |
| CBX3       | -0.241976388 | 0.0004462 | -0.111280733 | 0.1038845 | -0.113362474 | 0.097917 |
| MAPK1IP1L  | 0.615472566  | 0.0004461 | 0.185958516  | 0.288711  | 0.245440583  | 0.161561 |
| SLC12A2    | 0.69515615   | 0.0004453 | 0.411356331  | 0.0377101 | 0.828551578  | 2.84E-05 |
| ARL5B      | 0.359672893  | 0.0004512 | 0.224959373  | 0.0281536 | 0.481944486  | 2.53E-06 |
| ZNF706     | 0.356362741  | 0.0004544 | 0.268615977  | 0.0081384 | 0.671760341  | 2.58E-11 |
| FASTKD1    | -0.505023594 | 0.0004565 | -0.309111803 | 0.030037  | -0.377761293 | 0.008049 |
| EEF1A1P9   | -0.630351324 | 0.0004616 | -0.409327888 | 0.0181892 | -0.111218296 | 0.515268 |
| ZNF780A    | -0.62635093  | 0.0004621 | -0.367095807 | 0.0384641 | -0.414560121 | 0.020056 |
| CAPZB      | 0.261506524  | 0.0004688 | 0.156311119  | 0.0358746 | 0.344507332  | 3.56E-06 |
| MLYCD      | -0.468052033 | 0.0004774 | -0.488651922 | 0.000219  | -0.521920322 | 9.39E-05 |

|           |              |           |              |           |              |          |
|-----------|--------------|-----------|--------------|-----------|--------------|----------|
| ITGAV     | 0.611800241  | 0.0004786 | 0.465317789  | 0.0078938 | 0.768989625  | 1.13E-05 |
| BTBD19    | 0.571481142  | 0.0004794 | 0.288782382  | 0.0783622 | 0.295758194  | 0.072586 |
| MGAT2     | -0.271310236 | 0.0004818 | -0.176396069 | 0.0214629 | -0.108138325 | 0.159022 |
| ZNF721    | -0.452133916 | 0.0004878 | -0.477525681 | 0.0002143 | -0.371654822 | 0.003976 |
| C10orf10  | 0.930496655  | 0.0004955 | 0.796713801  | 0.002815  | 1.038435851  | 9.84E-05 |
| PDGFB     | 2.438046833  | 0.0004949 | 2.302208961  | 0.0010066 | 2.939378112  | 2.55E-05 |
| RMDN2     | -0.626846439 | 0.0005011 | -0.218907248 | 0.2091741 | -0.392670303 | 0.026655 |
| SAMD4A    | 0.842349122  | 0.000501  | 0.8979332    | 0.0002051 | 0.630819862  | 0.009122 |
| KNOP1     | -0.490809737 | 0.0005018 | -0.536662175 | 0.0001371 | -0.604408841 | 1.79E-05 |
| GCKR      | 1.147848316  | 0.0005058 | 0.486402782  | 0.1457687 | 0.912690736  | 0.005838 |
| DENND3    | 0.769778927  | 0.0005081 | 0.870987141  | 7.42E-05  | 0.650717764  | 0.003126 |
| LARP6     | 0.826056723  | 0.0005076 | 0.345872406  | 0.1450711 | 0.956406062  | 5.25E-05 |
| GNA15     | 1.572418424  | 0.0005116 | 0.837215517  | 0.0659114 | 1.926203862  | 1.93E-05 |
| CNKS1R1   | 0.823260189  | 0.0005164 | 0.001375157  | 0.9954706 | 0.575255828  | 0.015897 |
| C9orf40   | -0.6835022   | 0.0005196 | -0.104939864 | 0.5620607 | -0.510545889 | 0.0072   |
| KCTD11    | 0.761920816  | 0.0005251 | 0.805720103  | 0.0002302 | 1.27550694   | 4.73E-09 |
| PPFIBP2   | -0.770584521 | 0.0005293 | -0.648799715 | 0.0034729 | -0.395336065 | 0.074197 |
| ZNF10     | -0.667038281 | 0.0005313 | -0.21529846  | 0.2519393 | -0.452363713 | 0.018017 |
| PLCXD1    | 0.704953214  | 0.0005324 | -0.084287375 | 0.6788972 | 0.015353923  | 0.939955 |
| PPIE      | -0.320268293 | 0.000539  | -0.338707368 | 0.0001956 | -0.31862088  | 0.00049  |
| HAUS6     | -0.400358976 | 0.0005472 | -0.223998785 | 0.0511825 | -0.245252217 | 0.033147 |
| MRPL27    | -0.417591153 | 0.0005485 | -0.290941358 | 0.0147578 | -0.199633063 | 0.095067 |
| MRPS18C   | -0.413627494 | 0.0005492 | -0.11750844  | 0.3184408 | -0.125190866 | 0.290488 |
| ERI2      | -0.375710937 | 0.0005499 | -0.184174705 | 0.0832322 | -0.096203388 | 0.366202 |
| ETF1      | 0.271763431  | 0.0005529 | 0.360200317  | 4.35E-06  | 0.447689074  | 1.14E-08 |
| TBCE      | -0.362247699 | 0.0005543 | -0.123555493 | 0.227958  | -0.145571751 | 0.157321 |
| EPS8L3    | 0.624809146  | 0.0005579 | 0.138107927  | 0.4458389 | 0.544671763  | 0.002619 |
| EEA1      | -0.432677295 | 0.0005595 | 0.001380459  | 0.9911676 | -0.011104411 | 0.929029 |
| FOXJ1     | -1.64901596  | 0.0005658 | -2.77108022  | 9.72E-08  | -1.544498643 | 0.001023 |
| DENND5A   | 0.573756233  | 0.0005684 | 0.464360326  | 0.0052394 | 0.370910657  | 0.025877 |
| AURKA     | -0.616561342 | 0.0005728 | -0.339418255 | 0.0562456 | -0.480675945 | 0.00699  |
| NR3C2     | 0.965582672  | 0.0005794 | 0.039352629  | 0.88995   | 0.675787383  | 0.0164   |
| RFX5      | 0.40311504   | 0.0005826 | 0.221746216  | 0.0581753 | 0.380455379  | 0.001132 |
| G6PC3     | 0.392632449  | 0.0005837 | 0.032636277  | 0.7760114 | 0.176105541  | 0.124975 |
| ARHGEF19  | -0.505579429 | 0.0005864 | -0.638763238 | 1.33E-05  | -0.711205746 | 1.44E-06 |
| SH2D4A    | 0.679254648  | 0.0005903 | 0.364702399  | 0.0651717 | 0.967699059  | 9.46E-07 |
| DTX4      | -0.540505682 | 0.0005955 | -0.497027191 | 0.0015815 | -0.408060884 | 0.009474 |
| GNPDA2    | -0.386197625 | 0.0005997 | -0.112528783 | 0.3084086 | -0.134402832 | 0.228123 |
| TLR3      | 1.086675541  | 0.0006022 | 0.401428246  | 0.2062284 | 1.18506129   | 0.000146 |
| AGFG1     | 0.412899566  | 0.0006046 | 0.332012868  | 0.0057855 | 0.496620464  | 3.64E-05 |
| CDC23     | -0.28910263  | 0.000605  | -0.231882043 | 0.005335  | -0.248037652 | 0.002985 |
| MAP3K11   | 0.383283414  | 0.0006097 | 0.257511918  | 0.021901  | 0.328626905  | 0.003358 |
| PTBP1     | 0.4409333    | 0.0006101 | 0.200040562  | 0.1197772 | 0.27674434   | 0.031425 |
| NET1      | 0.448933052  | 0.0006118 | 0.214840816  | 0.1010205 | 0.762235152  | 5.71E-09 |
| TNFRSF10A | 0.786494428  | 0.0006169 | 1.030463548  | 6.93E-06  | 1.241968817  | 5.92E-08 |
| ZNF141    | -0.356229212 | 0.0006289 | -0.255564371 | 0.0128165 | -0.390848416 | 0.000163 |
| DUSP2     | 1.252281782  | 0.0006324 | 0.368372258  | 0.3181685 | 0.950373438  | 0.009536 |

|            |              |           |              |           |              |          |
|------------|--------------|-----------|--------------|-----------|--------------|----------|
| RCL1       | 0.621169148  | 0.0006347 | 0.418631166  | 0.0213475 | 0.705065399  | 0.000101 |
| ANAPC4     | -0.523270365 | 0.0006357 | -0.279679236 | 0.0644183 | -0.367680389 | 0.015464 |
| DENND4C    | -0.41765179  | 0.0006371 | -0.340676301 | 0.0052853 | -0.12960714  | 0.288329 |
| KANK1      | -0.495883851 | 0.0006415 | -0.350268906 | 0.0148925 | -0.309421623 | 0.031866 |
| CCDC121    | -0.664528773 | 0.0006519 | -0.347978002 | 0.0652373 | -0.433517639 | 0.022597 |
| RNF113A    | -0.548719346 | 0.0006627 | -0.319201059 | 0.0400672 | -0.299618318 | 0.05528  |
| TTC39B     | 0.422038218  | 0.000668  | 0.363294853  | 0.003343  | 0.355472556  | 0.004161 |
| GCN1L1     | 0.367026098  | 0.0006758 | 0.109851952  | 0.3091377 | 0.143789533  | 0.183    |
| COX19      | -0.657024436 | 0.0006793 | -0.641150838 | 0.0008698 | -0.646486556 | 0.000812 |
| GPR137     | 0.736834637  | 0.0006806 | 0.465639243  | 0.0323732 | 0.42592306   | 0.05169  |
| CEBPB      | 0.832764374  | 0.0006836 | 0.553361294  | 0.0241575 | 0.719987658  | 0.003303 |
| GPALPP1    | -0.346231655 | 0.0006894 | -0.132426537 | 0.1873263 | -0.099112101 | 0.326121 |
| STAMBPL1   | -0.646195278 | 0.0006993 | -0.102118002 | 0.5830945 | -0.721499641 | 0.000144 |
| KIAA0040   | 1.480508214  | 0.0007009 | 1.185354418  | 0.0064706 | 1.353407558  | 0.001921 |
| KLHDC7A    | -0.85967138  | 0.0007036 | -0.935714409 | 0.0001972 | -0.793306371 | 0.001557 |
| NELFE      | 0.28007279   | 0.0007124 | 0.131209548  | 0.1118218 | 0.186312331  | 0.024301 |
| MAP2K3     | 0.79148941   | 0.0007165 | 0.929740546  | 6.80E-05  | 0.930809597  | 6.67E-05 |
| P11-1220K2 | 1.411071573  | 0.0007201 | 1.006038564  | 0.0159218 | 1.216655209  | 0.003549 |
| TCEA1      | -0.294130024 | 0.0007231 | -0.225905598 | 0.0090308 | -0.134768202 | 0.119231 |
| DAB2       | 0.877123997  | 0.0007369 | 0.352342447  | 0.175612  | 0.238381856  | 0.359924 |
| EMP3       | 0.524402443  | 0.0007407 | 0.110819605  | 0.4768032 | 0.087960707  | 0.572676 |
| MLEC       | -0.37027311  | 0.000741  | -0.268462475 | 0.0143572 | -0.295108507 | 0.007146 |
| CCDC43     | -0.379859029 | 0.0007525 | -0.228675522 | 0.039801  | -0.193041531 | 0.083009 |
| ROCK2      | -0.428215164 | 0.0007532 | -0.20668802  | 0.1030904 | -0.326370728 | 0.010122 |
| DDR1       | 0.402532864  | 0.0007551 | 0.412022165  | 0.0005604 | 0.555908543  | 3.20E-06 |
| PALB2      | -0.583435155 | 0.0007606 | -0.307594972 | 0.0705862 | -0.423806777 | 0.013363 |
| PER1       | 1.062475245  | 0.0007667 | 0.702687896  | 0.0264026 | 0.995693843  | 0.001636 |
| RCE1       | 0.442026194  | 0.0007686 | 0.002730627  | 0.9835863 | 0.101719468  | 0.44244  |
| AGPAT3     | 0.336831114  | 0.0008001 | 0.22220272   | 0.0266579 | 0.283310916  | 0.004725 |
| GJC1       | 0.589984732  | 0.0008071 | 0.602591481  | 0.0005992 | 0.370360284  | 0.035649 |
| ZNF33A     | -0.374811269 | 0.0008094 | -0.127702428 | 0.2492182 | -0.175837463 | 0.113365 |
| SUZ12P     | -0.378698014 | 0.0008128 | 0.030876668  | 0.7762014 | -0.248589758 | 0.02535  |
| AGGF1      | -0.314713121 | 0.0008173 | -0.073678023 | 0.4274636 | -0.064612021 | 0.486839 |
| MRPS14     | -0.377572859 | 0.0008177 | -0.1353386   | 0.2188336 | -0.190170286 | 0.086341 |
| TMEM127    | 0.308544555  | 0.0008252 | -0.045985566 | 0.6181714 | 0.111705507  | 0.226327 |
| ADIPOR2    | 0.397476862  | 0.0008267 | 0.205412783  | 0.0838911 | 0.400177156  | 0.000751 |
| ABCD3      | -0.300127866 | 0.000833  | -0.218381758 | 0.0146431 | -0.086713643 | 0.331995 |
| BRICD5     | -0.677892381 | 0.0008337 | -0.723472814 | 0.0002935 | -0.548221869 | 0.006138 |
| RAB5B      | 0.210315998  | 0.0008333 | -0.109126763 | 0.0840293 | 0.06625751   | 0.292646 |
| ZNF69      | -0.545526307 | 0.0008404 | -0.72907422  | 7.67E-06  | -0.580188635 | 0.000362 |
| FAM177A1   | 0.371512996  | 0.0008555 | 0.393394587  | 0.0003856 | 0.561530866  | 3.95E-07 |
| CSRP2BP    | -0.449431221 | 0.0008617 | -0.032839622 | 0.8032035 | -0.265486398 | 0.046594 |
| DDX21      | 0.456741196  | 0.0008626 | 0.59443147   | 1.43E-05  | 0.812409973  | 3.01E-09 |
| MYB        | 1.24047372   | 0.0008697 | 1.189244174  | 0.0013894 | 2.121533919  | 9.87E-09 |
| RANBP6     | -0.354858152 | 0.0008804 | -0.257922183 | 0.0146596 | -0.320298536 | 0.00255  |
| SETD5      | 0.360308709  | 0.0008877 | 0.175848654  | 0.1048128 | 0.169532171  | 0.11803  |
| NECAP2     | 0.368841596  | 0.0008888 | 0.384886857  | 0.0004936 | 0.477165638  | 1.55E-05 |

|          |              |           |              |           |              |          |
|----------|--------------|-----------|--------------|-----------|--------------|----------|
| SLAIN1   | -0.670918892 | 0.0008907 | -0.669024632 | 0.0008892 | -0.273010386 | 0.173404 |
| PDCD6IP  | 0.312529123  | 0.0008946 | 0.231503507  | 0.0137496 | 0.444810408  | 2.16E-06 |
| HAS3     | 1.708579977  | 0.0009021 | 2.023985959  | 8.11E-05  | 2.022752336  | 8.26E-05 |
| ZBTB7A   | 0.479236961  | 0.0009033 | -0.001008014 | 0.9944522 | 0.24734123   | 0.087224 |
| TNNT2    | 1.204416236  | 0.0009047 | 0.38512957   | 0.2905733 | 0.435029701  | 0.232584 |
| SFRP2    | 3.164463058  | 0.0009068 | 3.085450024  | 0.0012012 | 2.06989537   | 0.031552 |
| SEN2     | -0.518016641 | 0.0009116 | -0.081563423 | 0.6004313 | 0.188184197  | 0.226899 |
| IRX2     | -1.333156318 | 0.0009195 | -1.009102247 | 0.0114049 | -1.176401209 | 0.003294 |
| TBC1D22B | 0.441176683  | 0.0009262 | 0.301767436  | 0.0228972 | 0.50634459   | 0.000126 |
| VPS26B   | -0.275115753 | 0.0009291 | -0.177098797 | 0.0295895 | -0.256460397 | 0.001769 |
| SLC9A8   | 0.731189351  | 0.0009323 | 0.530205302  | 0.0164331 | 0.919138795  | 2.96E-05 |
| ZNF200   | -0.440617186 | 0.0009483 | -0.3341372   | 0.0108014 | -0.512588056 | 0.000119 |
| GKN1     | -4.524989034 | 0.0009514 | -3.039950367 | 0.0249326 | -0.700273544 | 0.604203 |
| NKRD36BP | 0.78476271   | 0.0009576 | 0.861368498  | 0.0002673 | 1.241901043  | 1.29E-07 |
| C5orf22  | -0.355496453 | 0.0009574 | -0.058184815 | 0.5817944 | -0.251841877 | 0.017731 |
| RPL38    | 0.445454384  | 0.0009706 | 0.385002411  | 0.0043434 | 0.306141523  | 0.023376 |
| FAM179B  | -0.551253108 | 0.0009732 | -0.371689432 | 0.0256612 | -0.325587907 | 0.051139 |
| ARIH1    | 0.308785712  | 0.0009755 | 0.127639437  | 0.172048  | 0.19713935   | 0.035234 |
| TRMU     | -0.434097163 | 0.0009825 | -0.34832445  | 0.0076367 | -0.429466054 | 0.001069 |
| C1orf131 | -0.589556958 | 0.0009865 | -0.322753934 | 0.0684437 | -0.330577471 | 0.062379 |
| CSNK1G2  | 0.467903288  | 0.0009888 | 0.305260963  | 0.0315967 | 0.437889175  | 0.002019 |
| USP7     | 0.318353093  | 0.0010003 | 0.153761692  | 0.1115817 | -0.01370598  | 0.887196 |
| ZNF484   | -0.38829799  | 0.0010101 | -0.162132378 | 0.157481  | -0.385591325 | 0.000927 |
| PKDCC    | -0.640868821 | 0.0010113 | -0.737809857 | 0.0001522 | -0.934738196 | 1.64E-06 |
| CCDC112  | -0.916749532 | 0.0010282 | -0.257212707 | 0.3445224 | -0.60084136  | 0.028884 |
| LPHN1    | 0.407889437  | 0.0010349 | 0.178857779  | 0.1493742 | 0.088937525  | 0.474712 |
| MAP3K4   | -0.47126016  | 0.0010339 | -0.232125612 | 0.1046555 | -0.281957747 | 0.049014 |
| OARD1    | -0.464560324 | 0.0010339 | -0.382078421 | 0.0065888 | -0.151953474 | 0.278922 |
| ELOVL7   | 0.719508745  | 0.001051  | 0.830550477  | 0.0001383 | 0.892093454  | 4.45E-05 |
| MEX3C    | 0.667748378  | 0.0010563 | 0.347753811  | 0.0884037 | 0.450721397  | 0.027163 |
| ESRRA    | 0.414986085  | 0.0010582 | -0.01519479  | 0.9049107 | 0.276312278  | 0.028327 |
| KCNK1    | 0.687262141  | 0.0010617 | 0.321955308  | 0.1253711 | 1.036859206  | 6.80E-07 |
| RAB30    | 1.002249638  | 0.0010685 | 0.518912134  | 0.0909184 | 0.494937109  | 0.107722 |
| MPHOSPH8 | -0.44817383  | 0.0010717 | -0.002303638 | 0.9864326 | -0.180046351 | 0.187013 |
| OLFM4    | 3.083963121  | 0.0010737 | 3.505930393  | 0.0001989 | 1.974372351  | 0.036596 |
| THG1L    | -0.335330693 | 0.0010811 | -0.080604798 | 0.4187118 | -0.093791631 | 0.352067 |
| MFSD8    | -0.442958416 | 0.0010895 | -0.265543887 | 0.0484579 | -0.070979367 | 0.596786 |
| KLHL11   | -0.388690875 | 0.0011057 | -0.49539235  | 2.80E-05  | -0.700208208 | 6.13E-09 |
| NPTN     | 0.297257595  | 0.0011117 | 0.309220597  | 0.0006657 | 0.354334444  | 9.69E-05 |
| C1orf35  | -0.519948534 | 0.0011183 | -0.397381452 | 0.0105219 | -0.389945535 | 0.01328  |
| CRTC2    | 0.710166418  | 0.0011181 | 0.162483426  | 0.4585018 | 0.238647055  | 0.276246 |
| SLC25A46 | -0.277118094 | 0.0011327 | -0.084427649 | 0.3170478 | 0.014495243  | 0.863752 |
| R3HDM2   | 0.568733642  | 0.0011411 | 0.388482773  | 0.0262629 | 0.24084602   | 0.16878  |
| SPAST    | -0.374250928 | 0.0011481 | -0.280099804 | 0.0138731 | -0.427677228 | 0.000193 |
| SDCBP2   | 0.565329592  | 0.0011501 | 0.112012489  | 0.5200831 | 0.738449974  | 2.10E-05 |
| LRRC58   | -0.256193068 | 0.0011542 | -0.138858277 | 0.0750489 | -0.118636011 | 0.129074 |
| VEGFA    | 0.716413096  | 0.0011629 | 0.181641405  | 0.4104265 | 0.687798628  | 0.001821 |

|           |              |           |              |           |              |          |
|-----------|--------------|-----------|--------------|-----------|--------------|----------|
| FLRT3     | -0.526001336 | 0.0011661 | -0.559761823 | 0.0005341 | -0.790375738 | 1.10E-06 |
| GATAD1    | -0.311208889 | 0.001165  | -0.141682378 | 0.1351343 | -0.177938947 | 0.061097 |
| CLK3      | 0.487758578  | 0.0011698 | 0.652526093  | 1.34E-05  | 0.827730383  | 3.30E-08 |
| EID3      | 1.326542477  | 0.0011699 | 0.432434814  | 0.3042128 | 1.327826703  | 0.001093 |
| PPP2R5C   | -0.301817685 | 0.0011727 | -0.087633955 | 0.3443588 | -0.067452478 | 0.467075 |
| EPN3      | -1.068145067 | 0.0011794 | -1.187261682 | 0.0002553 | -0.974867869 | 0.002437 |
| ZFP69     | -0.616781126 | 0.0011985 | -0.526927752 | 0.0047439 | -0.325613847 | 0.081437 |
| PLEKHB2   | 0.291364904  | 0.0012048 | 0.14392126   | 0.1089977 | 0.399013746  | 8.62E-06 |
| ACOT11    | -0.349387943 | 0.0012064 | -0.432710242 | 5.25E-05  | -0.239628107 | 0.025209 |
| PHF3      | -0.291782298 | 0.0012351 | -0.245572689 | 0.0063957 | -0.235719019 | 0.008909 |
| PARG      | -0.622116878 | 0.0012476 | -0.346962868 | 0.0692267 | -0.472807007 | 0.013838 |
| SH3TC1    | 0.784723855  | 0.0012517 | 0.399980349  | 0.1004733 | 0.750936595  | 0.002017 |
| RAB32     | 0.554873144  | 0.0012693 | 0.425883412  | 0.0129297 | 0.708249992  | 3.11E-05 |
| SNRNP48   | -0.32321586  | 0.0012691 | -0.179454869 | 0.0684792 | -0.201499744 | 0.041788 |
| ZBTB7C    | 0.884039544  | 0.0012677 | 0.392031954  | 0.1538595 | 1.072332773  | 9.03E-05 |
| REM2      | 1.237347115  | 0.0012894 | 0.680082931  | 0.080247  | 1.318330393  | 0.000539 |
| LONRF1    | 0.432614676  | 0.0012977 | 0.30767494   | 0.0219767 | 0.781206808  | 5.07E-09 |
| AZIN1     | 0.369693047  | 0.0013005 | 0.038246462  | 0.7391444 | 0.267024115  | 0.020057 |
| EYA3      | 0.363186795  | 0.0013222 | 0.18599408   | 0.0999082 | 0.272712349  | 0.015941 |
| KIF21A    | 0.501630437  | 0.0013261 | 0.143661388  | 0.3585348 | 0.621996268  | 6.62E-05 |
| CPOX      | -0.494557089 | 0.0013405 | -0.179723914 | 0.2402157 | -0.114693844 | 0.454409 |
| COIL      | -0.272819036 | 0.0013433 | -0.352305904 | 3.02E-05  | -0.463366676 | 5.65E-08 |
| P11-85G20 | 1.134059237  | 0.0013434 | 0.789212249  | 0.0269883 | 0.787668284  | 0.02864  |
| TOLLIP    | 0.421828559  | 0.0013733 | 0.214250697  | 0.1049466 | 0.103058355  | 0.435652 |
| CSNK1D    | 0.362864627  | 0.0013786 | 0.064928722  | 0.5678376 | 0.213452977  | 0.060036 |
| PLEKHM2   | 0.433201372  | 0.0013811 | 0.261178516  | 0.0540876 | 0.413652534  | 0.002256 |
| NR4A3     | 2.698989346  | 0.0013861 | 2.478807998  | 0.0033181 | 2.667272281  | 0.001557 |
| TEP1      | -0.562190106 | 0.0013911 | -0.299366397 | 0.0881108 | -0.291396885 | 0.097113 |
| TFAP4     | -0.67917455  | 0.0014047 | -0.402626918 | 0.0547865 | -0.929071534 | 1.22E-05 |
| X1A-SULT1 | -0.602268019 | 0.001424  | -0.658517272 | 0.000443  | -0.775531054 | 4.07E-05 |
| BUD13     | -0.329691877 | 0.0014297 | -0.399648979 | 9.80E-05  | -0.447921165 | 1.50E-05 |
| C5orf51   | -0.261513181 | 0.0014278 | -0.318923427 | 8.69E-05  | -0.262298021 | 0.001319 |
| HYLS1     | -0.520752699 | 0.0014311 | -0.489906499 | 0.0022159 | -0.540727277 | 0.000841 |
| MAP2K7    | 0.850764983  | 0.0014316 | -0.02829657  | 0.9158689 | 0.181157363  | 0.4987   |
| THUMPD1   | -0.286707733 | 0.0014397 | -0.315594607 | 0.0004341 | -0.299090149 | 0.000867 |
| CITED2    | -0.636517722 | 0.0014444 | -0.571755677 | 0.004054  | -0.888233464 | 9.11E-06 |
| NKRD20A5  | -1.78778954  | 0.0014545 | 0.38073098   | 0.4498332 | -1.273642871 | 0.01767  |
| ALG6      | -0.317096409 | 0.0014638 | -0.212431123 | 0.0270306 | -0.286607972 | 0.003228 |
| ATP1A1    | 0.406727267  | 0.0014646 | 0.129648739  | 0.3105112 | 0.202579431  | 0.113059 |
| DCLRE1A   | -0.483681971 | 0.0014658 | -0.27330643  | 0.0686992 | -0.34942528  | 0.020356 |
| PRSS22    | 0.735084683  | 0.0014623 | 0.099349294  | 0.6693625 | 0.756118407  | 0.001049 |
| SRD5A3    | 0.596811536  | 0.0014656 | 0.468634975  | 0.0124652 | 1.257492693  | 1.67E-11 |
| ATM       | -0.390546105 | 0.001476  | -0.082579869 | 0.5000725 | -0.222326918 | 0.07003  |
| SPG21     | 0.304136317  | 0.0014861 | 0.118987194  | 0.2128768 | 0.30356278   | 0.001433 |
| AMER1     | -0.395320235 | 0.0014926 | -0.44892377  | 0.00029   | -0.428120452 | 0.000572 |
| BCL2L14   | 0.616885942  | 0.0014937 | 0.120742791  | 0.5362081 | 0.857131531  | 9.09E-06 |
| ZNF419    | -0.506233349 | 0.0014941 | -0.295562586 | 0.0595654 | -0.525369466 | 0.00094  |

|           |              |           |              |           |              |          |
|-----------|--------------|-----------|--------------|-----------|--------------|----------|
| ARF3      | 0.336479297  | 0.0014988 | 0.167021851  | 0.1149469 | 0.248418127  | 0.019032 |
| COBLL1    | -0.609696446 | 0.0015073 | -0.721247763 | 0.0001697 | -0.540567434 | 0.004802 |
| LGALS9C   | 1.863084575  | 0.0015123 | 1.615277427  | 0.0066182 | 1.222159065  | 0.042974 |
| PLEKHM1   | 0.772668385  | 0.0015127 | 0.039338955  | 0.874224  | -0.147897848 | 0.551178 |
| ZZZ3      | -0.287509786 | 0.0015139 | -0.182149883 | 0.0433711 | -0.16021428  | 0.075729 |
| SERTAD1   | 0.609671973  | 0.0015155 | 0.101975234  | 0.5983605 | 0.345842027  | 0.072863 |
| ASB13     | -0.630314329 | 0.0015273 | -0.446445046 | 0.02268   | -0.768822586 | 0.000109 |
| CDCA7     | -0.641520322 | 0.0015552 | -0.195706255 | 0.3306412 | -0.334164361 | 0.097355 |
| MICAL3    | 0.497781823  | 0.0015551 | 0.47705124   | 0.0023476 | 0.26541981   | 0.090946 |
| RBM34     | -0.429336463 | 0.0015605 | -0.224054394 | 0.0953813 | -0.179368695 | 0.182503 |
| VPS28     | 0.291133129  | 0.0015663 | -0.028765765 | 0.7556232 | 0.049169309  | 0.594967 |
| FRAT1     | -1.143385845 | 0.0015701 | -0.616303192 | 0.0768514 | -0.806232186 | 0.020163 |
| AREG      | 1.710369946  | 0.0015722 | 1.930028739  | 0.0003581 | 1.481864677  | 0.006176 |
| ARHGAP11A | -0.558856829 | 0.0015802 | -0.234141184 | 0.183627  | -0.355575229 | 0.043884 |
| IDH1      | -0.392659823 | 0.0015967 | -0.236208435 | 0.0573142 | -0.011680231 | 0.925087 |
| WTAP      | 0.280583337  | 0.0016268 | 0.14447076   | 0.1041498 | 0.153649901  | 0.084318 |
| FOS       | 0.702604592  | 0.0016291 | 0.68826424   | 0.0020017 | 1.268657714  | 1.16E-08 |
| VTRNR2L1  | 1.298362531  | 0.0016377 | 0.277663779  | 0.5127471 | -0.186245875 | 0.670205 |
| FBXO25    | -0.637867377 | 0.0016531 | -0.495301846 | 0.0141144 | -0.200433138 | 0.321348 |
| CCNI      | 0.342303844  | 0.0016596 | -0.032510849 | 0.7652937 | 0.061981451  | 0.569151 |
| HEG1      | 0.836964109  | 0.0016577 | 0.857335882  | 0.0012226 | 0.17292257   | 0.518228 |
| ZNF513    | 0.543655789  | 0.0016599 | 0.216115357  | 0.2126509 | 0.414120065  | 0.016378 |
| PIWIL2    | -1.567069128 | 0.0016617 | -0.196466207 | 0.6707332 | -0.853688585 | 0.080312 |
| A16c-17H1 | -0.838996307 | 0.0016886 | -0.514909641 | 0.0430137 | -0.23226874  | 0.355011 |
| FAM107B   | 0.537190478  | 0.0017082 | 0.391402957  | 0.0222624 | 0.815393727  | 1.86E-06 |
| LRRC47    | -0.463909931 | 0.0017162 | -0.264639382 | 0.0723211 | -0.261523323 | 0.076333 |
| TADA1     | -0.324868426 | 0.0017156 | -0.202082871 | 0.0455909 | -0.300156716 | 0.003381 |
| THBS1     | 0.910506592  | 0.0017139 | 0.964446958  | 0.0008947 | 0.663908638  | 0.022229 |
| ZNF84     | -0.347471904 | 0.0017216 | -0.34551069  | 0.0017388 | -0.439375431 | 7.19E-05 |
| GAS2L3    | -0.791527629 | 0.0017384 | -0.312053445 | 0.2155268 | -0.481767675 | 0.055994 |
| BRK1      | 0.211150746  | 0.0017473 | 0.083605629  | 0.2135163 | 0.210576039  | 0.001712 |
| CDH8      | 1.036603181  | 0.0017471 | -0.094914594 | 0.7792456 | 0.480818075  | 0.151366 |
| FRG1      | -0.304578448 | 0.0017531 | -0.13742619  | 0.13629   | 0.003849656  | 0.966643 |
| ZBTB8B    | -0.620332055 | 0.0017597 | -0.462823003 | 0.0169281 | -0.892626587 | 8.16E-06 |
| RNASEL    | -0.392867945 | 0.0017739 | -0.295882332 | 0.0156092 | -0.305269187 | 0.013303 |
| POT1      | -0.501465929 | 0.0017784 | -0.3003862   | 0.059168  | -0.35728495  | 0.025128 |
| DFFB      | -0.608100069 | 0.0017814 | -0.307454689 | 0.1072964 | -0.620236976 | 0.001326 |
| ELP5      | 0.285930252  | 0.0017891 | 0.00783783   | 0.9317761 | 0.170371907  | 0.062921 |
| PHC2      | 0.33192635   | 0.0017991 | 0.159118347  | 0.1343576 | 0.258496455  | 0.014996 |
| PSMC4     | 0.379489983  | 0.0018056 | 0.19044059   | 0.1171135 | 0.456142623  | 0.000166 |
| MRPL44    | -0.301325882 | 0.0018115 | -0.279529972 | 0.0033597 | -0.348624317 | 0.000286 |
| MTRF1     | -0.431979887 | 0.0018211 | -0.317493318 | 0.0200516 | -0.178456976 | 0.189392 |
| C6orf89   | 0.265425314  | 0.0018319 | 0.021832606  | 0.7975774 | 0.207522461  | 0.014719 |
| ZNF331    | -0.431083762 | 0.0018388 | -0.462971393 | 0.0007567 | -0.459753616 | 0.000904 |
| NME4      | 0.566702334  | 0.0018466 | -0.207328997 | 0.2563652 | -0.140324868 | 0.442507 |
| CCDC90B   | -0.270094917 | 0.0018521 | 0.01033267   | 0.9032554 | -0.192446303 | 0.025049 |
| IL6ST     | 0.431463199  | 0.0018603 | 0.377134627  | 0.0065109 | 0.39879183   | 0.004018 |

|          |              |           |              |           |              |          |
|----------|--------------|-----------|--------------|-----------|--------------|----------|
| CIC      | 0.480397762  | 0.0018621 | -0.000954503 | 0.995075  | 0.205290421  | 0.184164 |
| ARRDC2   | 0.723689473  | 0.0018668 | 0.2884053    | 0.216933  | 0.851153111  | 0.000239 |
| ASTE1    | -0.79750942  | 0.0018651 | -0.561411706 | 0.0273287 | -0.789361912 | 0.001985 |
| KDELR1   | 0.35656007   | 0.0019002 | -0.189691326 | 0.0989357 | -0.065139814 | 0.571099 |
| LSR      | 0.526542401  | 0.0019026 | 0.188665263  | 0.266177  | 0.561742166  | 0.00092  |
| POC5     | -0.503929324 | 0.0018999 | -0.095508914 | 0.5418423 | -0.028039125 | 0.858127 |
| RPL14    | 0.367414259  | 0.0019033 | 0.085235498  | 0.4712592 | 0.258393151  | 0.028956 |
| ZNF33B   | -0.769250975 | 0.0019035 | -0.543489113 | 0.0253425 | -1.007602412 | 4.39E-05 |
| FLOT2    | -0.471714696 | 0.0019077 | -0.568274615 | 0.0001813 | -0.253347036 | 0.094182 |
| POU2F3   | 1.671877112  | 0.0019104 | 1.494579937  | 0.0054004 | 2.325450938  | 1.33E-05 |
| ZNF252P  | -0.378426907 | 0.0019172 | -0.311832411 | 0.0099851 | -0.269255775 | 0.026333 |
| TAB2     | 0.336070573  | 0.0019211 | 0.050844936  | 0.639063  | 0.236484893  | 0.028967 |
| HELLS    | 0.703612363  | 0.0019229 | 0.567925505  | 0.0122716 | 0.848942299  | 0.000181 |
| LRRC4    | 0.916583001  | 0.0019339 | -0.105853714 | 0.7214696 | 1.207007851  | 4.24E-05 |
| UTP14C   | -0.236656665 | 0.0019438 | -0.2073258   | 0.0059153 | -0.273125155 | 0.000323 |
| NDNL2    | -0.447474947 | 0.0019575 | -0.455618433 | 0.0014426 | -0.44189007  | 0.002078 |
| RHOV     | 1.435377253  | 0.001962  | 1.247463084  | 0.0070937 | 1.83356413   | 6.94E-05 |
| C1orf109 | -0.475703598 | 0.0019669 | -0.396326167 | 0.0091278 | -0.479198095 | 0.001661 |
| TTC4     | -0.324884013 | 0.0019783 | -0.306884371 | 0.0030002 | -0.309041323 | 0.003039 |
| INTS6    | -0.26159187  | 0.0019816 | -0.327512286 | 0.0001038 | -0.230713313 | 0.006253 |
| ZSCAN29  | -0.293134422 | 0.0019973 | -0.412904023 | 1.13E-05  | -0.417764524 | 1.04E-05 |
| CA13     | -0.486434461 | 0.0020181 | -0.459741179 | 0.0033527 | -0.609602258 | 0.000108 |
| COL9A2   | 0.856218267  | 0.002026  | 0.592111114  | 0.0326768 | 0.762034502  | 0.005904 |
| ZNF625   | -0.773852006 | 0.0020357 | -0.448204998 | 0.067091  | -1.031973074 | 3.72E-05 |
| JADE2    | -0.563647268 | 0.0020377 | -0.599630986 | 0.001007  | -0.65435279  | 0.000345 |
| CHKA     | -0.473313412 | 0.0020396 | -0.625260207 | 4.38E-05  | -0.374433943 | 0.014169 |
| C2orf44  | -0.411340062 | 0.0020469 | -0.372104945 | 0.004454  | -0.586501552 | 1.07E-05 |
| RSC1A1   | -0.547691163 | 0.0020501 | -0.364524496 | 0.0364644 | -0.324180064 | 0.063469 |
| PQLC1    | 0.423807889  | 0.0020611 | 0.064426183  | 0.6408565 | 0.282855402  | 0.039078 |
| LIN9     | -0.486362036 | 0.0020663 | -0.18803561  | 0.2242388 | -0.272381215 | 0.080344 |
| MAP4K4   | 0.391677805  | 0.0020668 | 0.391337809  | 0.0020576 | 0.505677528  | 6.86E-05 |
| EPB41L2  | -0.472774171 | 0.00207   | 0.089108546  | 0.5600319 | -0.166577886 | 0.277057 |
| TMEM184B | 0.455731672  | 0.0021033 | 0.227303843  | 0.1251575 | 0.452049664  | 0.002247 |
| TMEM57   | -0.404603213 | 0.0021058 | -0.172935216 | 0.1860594 | -0.216529272 | 0.098135 |
| ZHX1     | -0.297785411 | 0.0021182 | -0.297577448 | 0.0020378 | -0.219870997 | 0.022643 |
| EPHA1    | -0.500640229 | 0.0021202 | -0.442760303 | 0.0064297 | -0.352464838 | 0.029522 |
| KLHL21   | -0.549262863 | 0.0021223 | -0.449476693 | 0.0116089 | -0.432690935 | 0.015189 |
| MTATP6P1 | 0.9675036    | 0.0021318 | 0.294248289  | 0.3521739 | -0.010165999 | 0.974481 |
| SLC7A1   | 0.521692562  | 0.002134  | 0.413246789  | 0.014869  | 0.788608627  | 3.25E-06 |
| GSK3A    | 0.4539761    | 0.0021387 | 0.122507448  | 0.4082489 | 0.059707497  | 0.688164 |
| PARP16   | -0.50160129  | 0.0021379 | -0.364720253 | 0.0226428 | -0.319163378 | 0.046973 |
| TCF20    | 0.245818644  | 0.0021436 | 0.142332421  | 0.0731597 | 0.143565528  | 0.071977 |
| DRAM1    | 0.58151546   | 0.0021472 | 0.553195742  | 0.003448  | 0.765188925  | 5.04E-05 |
| FAM118B  | 0.384595745  | 0.0021534 | 0.537022666  | 1.55E-05  | 0.59918088   | 1.43E-06 |
| FAM83G   | 0.5188605    | 0.0021538 | 0.670691934  | 6.60E-05  | 0.77769844   | 3.70E-06 |
| RPP30    | -0.298334708 | 0.0021816 | -0.137528982 | 0.1469609 | -0.114143832 | 0.232111 |
| SERPINE1 | 1.625294558  | 0.0021823 | 1.119997301  | 0.0348182 | 1.158393438  | 0.02907  |

|              |              |           |              |           |              |          |
|--------------|--------------|-----------|--------------|-----------|--------------|----------|
| MYLIP        | -0.446225304 | 0.0021915 | -0.709586457 | 1.14E-06  | -0.61913565  | 2.19E-05 |
| DNAJB1       | 0.29572645   | 0.0021995 | 0.019149251  | 0.8430789 | 0.225105576  | 0.01973  |
| P11-480I12   | -0.898055639 | 0.0022041 | -1.007306013 | 0.0005583 | -1.333661581 | 7.59E-06 |
| JD7-PLA2G    | -1.03749623  | 0.0022248 | -0.590133513 | 0.0790306 | -0.141448109 | 0.674872 |
| DHX9         | 0.265677477  | 0.002232  | 0.174721921  | 0.0441592 | 0.222212682  | 0.010495 |
| ISG20L2      | 0.524796046  | 0.002233  | 0.383837691  | 0.0253793 | 0.362476171  | 0.034889 |
| B2M          | 0.42598581   | 0.0022381 | 0.384487771  | 0.0057919 | 0.65447806   | 2.63E-06 |
| AM47E-STBI   | -0.754804612 | 0.0022381 | -0.684491623 | 0.0054199 | -0.367154923 | 0.135233 |
| ABHD10       | -0.370327719 | 0.0022402 | -0.087209469 | 0.4634121 | -0.260701803 | 0.029424 |
| CBX8         | -0.758763109 | 0.0022537 | -0.91452687  | 0.0001573 | -1.032115321 | 2.47E-05 |
| hsa-mir-119f | -0.82793343  | 0.0022549 | -0.826046184 | 0.0021528 | -0.73369821  | 0.005411 |
| RASGRP3      | 0.73921039   | 0.0022645 | 0.832351004  | 0.0005703 | 1.288371389  | 8.14E-08 |
| MEIS3P1      | 0.575803981  | 0.0022796 | 0.402689042  | 0.0322243 | 0.568648978  | 0.002401 |
| RAP2B        | 0.316791959  | 0.0022766 | 0.071818765  | 0.4890888 | 0.633512595  | 8.45E-10 |
| TEFM         | -0.57249225  | 0.0022776 | -0.224880971 | 0.2206571 | -0.288852044 | 0.117607 |
| UNC119B      | -0.291984987 | 0.0022788 | -0.22416058  | 0.0179842 | -0.428406192 | 7.57E-06 |
| SAP30BP      | 0.342461345  | 0.0022837 | 0.292553944  | 0.0090227 | 0.368866473  | 0.000988 |
| SMC4         | -0.450087247 | 0.0022995 | 0.116701799  | 0.4281834 | -0.218041469 | 0.139134 |
| GDI1         | 0.326299661  | 0.0023038 | 0.095885905  | 0.370061  | -0.013995239 | 0.896314 |
| ADCY10P1     | -1.24168038  | 0.0023089 | -0.788737557 | 0.0478952 | -0.83314182  | 0.037165 |
| ATMIN        | -0.269725831 | 0.0023109 | -0.069583702 | 0.4282382 | -0.248107604 | 0.004942 |
| RDH14        | -0.383515135 | 0.0023086 | -0.347262973 | 0.0050677 | -0.128631101 | 0.296289 |
| PRUNE        | -0.459629331 | 0.0023263 | -0.488727116 | 0.0012252 | -0.465749447 | 0.002073 |
| ANKRD32      | -0.644396796 | 0.00233   | -0.145970966 | 0.4852779 | -0.186482632 | 0.373626 |
| MAT2B        | -0.262218342 | 0.0023322 | -0.165920234 | 0.0501917 | -0.18439513  | 0.030493 |
| FAM160A1     | 0.710036743  | 0.0023446 | 0.652059435  | 0.0052731 | 0.963947696  | 3.49E-05 |
| MLK4         | -0.515383606 | 0.002347  | -0.394491143 | 0.0188858 | -0.157068535 | 0.348178 |
| C1orf64      | 1.202766095  | 0.0023616 | 1.154391408  | 0.0031767 | 0.727966694  | 0.071967 |
| SALL4        | 0.703850119  | 0.0023683 | 0.704868873  | 0.002303  | 0.432359162  | 0.0621   |
| WRNIP1       | -0.290960386 | 0.0023706 | -0.160500238 | 0.088135  | -0.086986375 | 0.356107 |
| LYN          | 0.614764397  | 0.0023839 | 0.808840635  | 5.72E-05  | 1.190392862  | 2.91E-09 |
| ZFPM1        | -0.882372155 | 0.0024002 | -0.808095322 | 0.0053903 | -0.955469751 | 0.001009 |
| DRD1         | 1.083521509  | 0.0024188 | 1.421830817  | 5.41E-05  | 1.03899771   | 0.003537 |
| FBRS         | 0.493215206  | 0.0024259 | 0.082932166  | 0.6124523 | 0.159455604  | 0.32958  |
| BIK          | 1.233514101  | 0.0024382 | 1.107175027  | 0.0063904 | 1.803985287  | 7.16E-06 |
| SSH2         | 0.558784377  | 0.0024373 | 0.232122702  | 0.2094408 | 0.482204426  | 0.008828 |
| CENPA        | -0.766951209 | 0.0024588 | -0.089511829 | 0.7138123 | -0.43271083  | 0.079166 |
| TOR4A        | 0.491163581  | 0.0024684 | -0.043104237 | 0.7917762 | 0.339445396  | 0.036461 |
| UFSP2        | -0.438204084 | 0.0024777 | -0.061927372 | 0.6656433 | -0.020028132 | 0.889036 |
| PELI3        | -0.66169185  | 0.0024801 | -0.063349242 | 0.7598512 | -0.303592377 | 0.148609 |
| DERL2        | -0.324985212 | 0.002485  | -0.320957741 | 0.002616  | -0.232709966 | 0.029573 |
| PTGER4       | 1.182608659  | 0.0025061 | 0.750206075  | 0.0551385 | 0.596924979  | 0.127016 |
| CDC40        | -0.554241378 | 0.0025166 | -0.290514636 | 0.1115356 | -0.426887318 | 0.019553 |
| RGS16        | 1.063261054  | 0.0025174 | 1.420884355  | 4.84E-05  | 2.003727099  | 8.90E-09 |
| PDP2         | -0.613087565 | 0.0025305 | -0.252574095 | 0.2088363 | -0.553568004 | 0.006062 |
| TMEM223      | -0.358719844 | 0.0025404 | -0.132974817 | 0.2486047 | -0.299428178 | 0.010513 |
| ZBTB5        | 0.329808458  | 0.0025416 | 0.085622071  | 0.4333604 | 0.10686304   | 0.329469 |



|            |              |           |              |           |              |          |
|------------|--------------|-----------|--------------|-----------|--------------|----------|
| SLBP       | -0.358439855 | 0.0025583 | -0.179999067 | 0.126841  | -0.12765017  | 0.279313 |
| ZNF700     | -0.501075462 | 0.0025756 | -0.403489033 | 0.0138885 | -0.362387999 | 0.02756  |
| TMEM80     | -0.563157656 | 0.0025852 | -0.48369629  | 0.0088994 | -0.390755142 | 0.034928 |
| OVOL2      | -1.103580251 | 0.0025962 | -1.2173262   | 0.0007826 | -0.828594689 | 0.016757 |
| SHPRH      | -0.449457117 | 0.0025965 | -0.265512925 | 0.0740295 | -0.44269319  | 0.002975 |
| ZNF30      | -0.855184335 | 0.002614  | -0.625670784 | 0.0249706 | -0.893549532 | 0.001621 |
| EBPL       | -0.334464634 | 0.0026549 | -0.067490604 | 0.5335469 | -0.122063895 | 0.263388 |
| SDHAF1     | -0.532208685 | 0.0026543 | -0.544197676 | 0.0017352 | -0.627396676 | 0.000376 |
| SMG8       | -0.35870545  | 0.002657  | -0.544213045 | 4.97E-06  | -0.70999087  | 3.60E-09 |
| ZFP14      | -0.539009754 | 0.0026563 | -0.298132697 | 0.0918889 | -0.267630496 | 0.133264 |
| OXNAD1     | -0.35900124  | 0.0026648 | -0.138044578 | 0.2350104 | 0.009287557  | 0.935817 |
| ZNF717     | -0.808483252 | 0.0026785 | -0.327207111 | 0.2159243 | -0.69536974  | 0.009849 |
| P11-206L10 | -1.270518461 | 0.0027023 | 0.423509937  | 0.2897837 | -0.407045931 | 0.319307 |
| NAB1       | 0.335952266  | 0.0027093 | 0.36473824   | 0.0011322 | 0.503084941  | 6.95E-06 |
| TPCN1      | 0.48798022   | 0.0027251 | 0.067075205  | 0.6814621 | -0.147319042 | 0.368003 |
| DNAL1      | -0.561940048 | 0.0027404 | -0.324323066 | 0.0836749 | -0.227020968 | 0.225763 |
| MMAB       | -0.363752141 | 0.0027422 | -0.271060772 | 0.0246133 | -0.071319253 | 0.553824 |
| PRKCZ      | -0.504148681 | 0.0027418 | -0.471592903 | 0.0049197 | -0.50514522  | 0.002614 |
| RN7SL467F  | -0.898113217 | 0.002747  | 0.39277377   | 0.1307207 | 0.067481133  | 0.800914 |
| MRPS6      | -0.264064018 | 0.0027534 | -0.356624798 | 4.67E-05  | -0.369707064 | 2.69E-05 |
| IFT81      | -0.432726871 | 0.0027646 | -0.103284305 | 0.4679613 | -0.105925995 | 0.460548 |
| TES        | 0.258211821  | 0.0027643 | 0.122889512  | 0.1538019 | 0.421542953  | 9.51E-07 |
| SACM1L     | -0.310607871 | 0.0027675 | -0.2197903   | 0.0327803 | -0.162393837 | 0.115753 |
| AKIRIN1    | 0.340179985  | 0.0027761 | 0.210909922  | 0.063408  | 0.170613573  | 0.133518 |
| BHLHE40    | 0.754957697  | 0.0027767 | 0.926232032  | 0.0002394 | 1.78733424   | 1.29E-12 |
| PHACTR2    | 0.315596338  | 0.0027768 | 0.223315418  | 0.0341246 | 0.436117595  | 3.48E-05 |
| SYNGR2     | 0.383299269  | 0.002779  | 0.137677778  | 0.2826308 | 0.567499596  | 8.91E-06 |
| MFN2       | 0.340638989  | 0.0027932 | 0.171716529  | 0.1309499 | 0.137087205  | 0.228427 |
| KCNE3      | -0.989012204 | 0.0028116 | -1.123724966 | 0.0006798 | -0.141561008 | 0.667745 |
| MPV17L2    | -0.424341907 | 0.0028294 | -0.007104071 | 0.9575627 | -0.126220569 | 0.353272 |
| NDUFC2     | -0.308049785 | 0.0028265 | -0.121152052 | 0.236211  | -0.085933244 | 0.401533 |
| SLC25A32   | 0.382598312  | 0.0028278 | 0.314548653  | 0.0137441 | 0.498758603  | 9.28E-05 |
| CINP       | -0.279570451 | 0.0028357 | -0.215582834 | 0.0179938 | -0.072815542 | 0.425488 |
| WWC1       | 0.552331378  | 0.0028532 | 0.631818743  | 0.0006236 | 0.668055794  | 0.000296 |
| ANKRD49    | -0.390061867 | 0.0028583 | -0.389864346 | 0.0027573 | -0.328818148 | 0.011478 |
| SRPK1      | 0.437375648  | 0.0028564 | 0.483714451  | 0.0009631 | 0.699268744  | 1.81E-06 |
| GEM        | 0.779213225  | 0.0028817 | 1.011776172  | 0.0001063 | 0.317633074  | 0.224957 |
| CHCHD4     | -0.56497878  | 0.002895  | -0.377245262 | 0.0424151 | -0.2707504   | 0.144709 |
| MRPS34     | -0.448989991 | 0.0028935 | -0.315742235 | 0.034441  | -0.157966578 | 0.289105 |
| RAPGEF1    | 0.437808186  | 0.0029062 | -0.046385825 | 0.7527385 | 0.113711727  | 0.439746 |
| SZRD1      | 0.306732706  | 0.0029306 | 0.012105051  | 0.9064654 | 0.087932288  | 0.393517 |
| EPS8       | 0.343817035  | 0.0029339 | 0.321881826  | 0.0053005 | 0.435549867  | 0.000161 |
| PSTPIP2    | 0.897238856  | 0.0029745 | 0.954272024  | 0.0015718 | 1.305935073  | 1.47E-05 |
| TMEM30A    | 0.368366806  | 0.0029762 | 0.089364231  | 0.4710789 | 0.292807168  | 0.018206 |
| AGO2       | 0.555968989  | 0.0030031 | 0.602907226  | 0.0012852 | 0.751988193  | 5.94E-05 |
| SPPL2A     | 0.334027921  | 0.0030065 | 0.310896287  | 0.005649  | 0.469210076  | 2.93E-05 |
| THUMPD2    | -0.424719936 | 0.0030336 | -0.119548914 | 0.3926035 | -0.281725197 | 0.046216 |

|            |              |           |              |           |              |          |
|------------|--------------|-----------|--------------|-----------|--------------|----------|
| SLC16A3    | 0.996644464  | 0.0030492 | 0.275908637  | 0.4118362 | 0.570214341  | 0.089958 |
| ZNF439     | -0.873603868 | 0.0030591 | -0.499935143 | 0.0815786 | -1.035708855 | 0.000534 |
| CHEK2      | -0.400036708 | 0.0030699 | -0.263896723 | 0.0480284 | -0.116215935 | 0.382982 |
| SAMD14     | 0.705187628  | 0.0030769 | 0.358800876  | 0.1340806 | -0.478504378 | 0.054576 |
| TCEAL8     | -0.247532175 | 0.0030778 | 0.005659853  | 0.9453718 | -0.016193738 | 0.844963 |
| TMTC4      | -0.376827971 | 0.0030757 | -0.173896737 | 0.1647395 | -0.148473658 | 0.237157 |
| SNRNP35    | -0.367301397 | 0.0030828 | -0.236514656 | 0.0517332 | -0.243090212 | 0.047177 |
| SAMD8      | 0.330140203  | 0.0030858 | 0.212557931  | 0.0555983 | 0.347852591  | 0.001755 |
| NUP93      | 0.44566212   | 0.003089  | 0.473309553  | 0.0016183 | 0.326503077  | 0.029618 |
| NUDT16     | -0.314086057 | 0.0030953 | -0.151129214 | 0.1500677 | -0.316378499 | 0.002793 |
| TOR1AIP2   | 0.185019267  | 0.0030945 | 0.102258281  | 0.1016848 | 0.01817589   | 0.771535 |
| CCNF       | -0.541539807 | 0.003132  | -0.391791085 | 0.031569  | -0.536019658 | 0.003381 |
| FOXO3      | 0.341337393  | 0.0031357 | 0.400136269  | 0.0005126 | 0.32913683   | 0.004318 |
| GRAMD1B    | -0.886440892 | 0.0031383 | -1.064499444 | 0.0004092 | -0.885669153 | 0.003104 |
| MAP4K2     | 0.571276714  | 0.0031512 | 0.0702793    | 0.7165402 | 0.348719351  | 0.072063 |
| CELF1      | 0.318032693  | 0.0031721 | 0.176200683  | 0.102219  | 0.286573342  | 0.007815 |
| P11-384K6  | 0.675500786  | 0.0031741 | 0.116132406  | 0.6164449 | 0.056478584  | 0.808877 |
| AACS       | -0.346231745 | 0.003192  | -0.284619925 | 0.0148473 | -0.147058926 | 0.207678 |
| BBS10      | -0.412983288 | 0.0031876 | 0.055095034  | 0.6818546 | -0.305088583 | 0.026796 |
| SHISA9     | 0.599653661  | 0.0031905 | 0.811175725  | 5.56E-05  | 0.738573479  | 0.000255 |
| DNAJC21    | -0.249307247 | 0.0032028 | -0.086458707 | 0.3027466 | 0.008321343  | 0.921071 |
| PROX2      | -1.170684224 | 0.0032115 | -0.340526875 | 0.3099397 | -0.88796309  | 0.015234 |
| PET117     | -0.594517401 | 0.0032234 | -0.395357269 | 0.0448187 | -0.395450027 | 0.04581  |
| TRAF4      | 0.33896332   | 0.0032331 | 0.042629672  | 0.711411  | 0.279390563  | 0.015165 |
| FAM150B    | 1.148927013  | 0.0032502 | 1.34847688   | 0.0004587 | 1.032147644  | 0.007936 |
| ACTR6      | -0.415002024 | 0.0032708 | -0.283794852 | 0.0398863 | -0.314649014 | 0.022757 |
| RAB11FIP4  | -0.566819488 | 0.0032866 | -0.386849155 | 0.0439602 | -0.265014597 | 0.165836 |
| KDM5C      | 0.239396722  | 0.0032929 | 0.027635342  | 0.7345108 | 0.095116384  | 0.243445 |
| GNL1       | 0.470931923  | 0.0033031 | -0.036899212 | 0.8180282 | 0.080394596  | 0.616002 |
| ARMC7      | -0.464523468 | 0.0033073 | -0.781476084 | 1.29E-06  | -0.887945807 | 7.16E-08 |
| ARL4A      | -0.676211461 | 0.0033107 | -0.702866561 | 0.0021856 | -0.665344018 | 0.003755 |
| SMAD2      | 0.198546309  | 0.0033178 | -0.001988174 | 0.9764996 | 0.218170016  | 0.001225 |
| GATAD2A    | 0.277788733  | 0.0033329 | 0.218232041  | 0.0208063 | 0.221499742  | 0.019131 |
| PDHB       | -0.215076905 | 0.0033527 | -0.181990526 | 0.0122397 | -0.052501099 | 0.469977 |
| ZBTB6      | -0.285833572 | 0.0033502 | -0.259478106 | 0.0068248 | -0.32784201  | 0.000711 |
| AC040977.1 | 0.492566318  | 0.003357  | 0.220569115  | 0.1892945 | 0.285217945  | 0.089798 |
| SLC6A15    | 1.351152831  | 0.0033612 | 0.159444311  | 0.7328577 | 0.301073366  | 0.516515 |
| FAM76A     | -0.350855882 | 0.003368  | 0.116114281  | 0.3129011 | 0.071282662  | 0.539493 |
| WWC3       | 0.476464367  | 0.0033758 | 0.539961798  | 0.0008258 | 0.496734649  | 0.002185 |
| ZNF180     | -0.375409812 | 0.003378  | -0.446333067 | 0.0004514 | -0.426851712 | 0.000817 |
| GSPT1      | 0.320247509  | 0.0033906 | 0.349845251  | 0.001353  | 0.506720097  | 3.44E-06 |
| SNURF      | -0.4517386   | 0.0033919 | 0.021949802  | 0.8833471 | -0.493438422 | 0.001292 |
| TMEM64     | -0.348486476 | 0.0033878 | -0.073380878 | 0.5342678 | -0.215507922 | 0.068392 |
| C19orf44   | -0.701015891 | 0.0033948 | -0.418796485 | 0.0645134 | -0.754433706 | 0.001455 |
| ELF2       | -0.261461471 | 0.0034036 | -0.271400458 | 0.0022098 | -0.28501434  | 0.001318 |
| NFXL1      | -0.457705534 | 0.0034032 | -0.38421413  | 0.0132836 | -0.487394175 | 0.001758 |
| SS18       | 0.287776277  | 0.0033989 | 0.340874711  | 0.0004955 | 0.353960256  | 0.000301 |

|            |              |           |              |           |              |          |
|------------|--------------|-----------|--------------|-----------|--------------|----------|
| ZC3H7A     | -0.455627428 | 0.0034083 | -0.263500225 | 0.0896216 | -0.308600501 | 0.047049 |
| CCDC85B    | 1.067740167  | 0.0034128 | 0.482121843  | 0.1915414 | 0.876678494  | 0.016387 |
| MEGF11     | 0.888673412  | 0.0034267 | 0.295237557  | 0.3301635 | 0.500871456  | 0.097543 |
| DCTN3      | 0.332753135  | 0.003437  | 0.045438331  | 0.6893909 | 0.00560617   | 0.961016 |
| CD3EAP     | -0.632902379 | 0.0034446 | -0.594161497 | 0.0058238 | -0.699464948 | 0.001242 |
| P11-396K3. | -0.435964267 | 0.0034467 | -0.01876181  | 0.8994416 | -0.523460052 | 0.000443 |
| CEP44      | -0.401366774 | 0.0034589 | -0.321525372 | 0.0180397 | -0.360778809 | 0.008335 |
| KIAA1143   | -0.464973661 | 0.0034647 | -0.347429716 | 0.0280442 | 0.003530212  | 0.982223 |
| SEC24A     | 0.379251432  | 0.0034661 | 0.243285757  | 0.0606684 | 0.537192701  | 3.39E-05 |
| STAT6      | 0.266605099  | 0.0034651 | 0.245217602  | 0.0071293 | 0.339768121  | 0.00019  |
| TMEM92     | 0.658764542  | 0.0034919 | -0.423461856 | 0.0630067 | -0.120602894 | 0.594572 |
| MKS1       | -0.504100801 | 0.0035016 | -0.271023538 | 0.1146288 | -0.745922747 | 1.65E-05 |
| NIPSNAP3A  | -0.298471024 | 0.0035113 | -0.129645878 | 0.1885455 | 0.111344065  | 0.253369 |
| APC        | -0.302921774 | 0.0035422 | -0.265596933 | 0.010355  | -0.411311782 | 7.51E-05 |
| NCCRP1     | 1.200694687  | 0.0035403 | 0.802219885  | 0.0528592 | 0.998352438  | 0.015555 |
| RCOR3      | -0.406279223 | 0.0035415 | -0.244709273 | 0.0766478 | -0.341050589 | 0.014125 |
| ING5       | -0.412072683 | 0.0035484 | -0.281366148 | 0.0450452 | -0.18007917  | 0.19962  |
| MB21D1     | 0.852657876  | 0.0036002 | 0.505685662  | 0.0869886 | 1.342021774  | 2.87E-06 |
| FBXW2      | -0.269882786 | 0.003628  | -0.184993287 | 0.0449885 | -0.151901412 | 0.100489 |
| MRPL33     | -0.277603278 | 0.0036263 | -0.226907583 | 0.0153019 | -0.196843542 | 0.036023 |
| GPSM2      | -0.503889736 | 0.0036509 | -0.11587491  | 0.5017821 | -0.007871419 | 0.963616 |
| ZNF702P    | -0.521063017 | 0.0036648 | -0.715947332 | 6.62E-05  | -0.332282192 | 0.062454 |
| IL33       | -1.381558254 | 0.0036696 | -0.359825256 | 0.4377789 | -0.347675198 | 0.452247 |
| L3HYPDH    | -0.548363624 | 0.0036936 | -0.318966959 | 0.079426  | -0.136934397 | 0.449388 |
| MTG2       | -0.32912038  | 0.0036949 | -0.203702757 | 0.0670577 | -0.317754669 | 0.00472  |
| IRS4       | 1.761820394  | 0.0036999 | 0.635556058  | 0.3022248 | 1.484631398  | 0.014615 |
| FAM200A    | -0.37474615  | 0.0037126 | -0.27831467  | 0.0268413 | -0.387573125 | 0.002493 |
| IRF2BPL    | 0.593648008  | 0.0037087 | 0.497600337  | 0.0148841 | 0.53330711   | 0.009088 |
| SCRN1      | 0.234211843  | 0.0037129 | 0.079794689  | 0.322478  | 0.192138732  | 0.017168 |
| CH25H      | 1.351649797  | 0.0037183 | 1.549704707  | 0.0008029 | 1.962577527  | 2.02E-05 |
| TBCC       | -0.351186628 | 0.003719  | -0.264922694 | 0.0258202 | -0.45119573  | 0.000187 |
| SIN3A      | 0.274700358  | 0.0037539 | 0.099897753  | 0.2912907 | 0.159409637  | 0.09215  |
| ASB8       | -0.282151376 | 0.0037725 | -0.303142205 | 0.0015192 | -0.242747216 | 0.011057 |
| PIGA       | 0.675348872  | 0.0037926 | 0.817927783  | 0.000445  | 1.470259444  | 2.56E-10 |
| MPHOSPHC   | -0.37196316  | 0.0038033 | -0.13023274  | 0.2994833 | -0.295337936 | 0.01984  |
| ZNF182     | -0.430845844 | 0.0038104 | -0.303705222 | 0.0363404 | -0.315069092 | 0.030517 |
| BCDIN3D    | -0.547839331 | 0.0038245 | -0.408415914 | 0.0278129 | -0.397969012 | 0.033557 |
| YAE1D1     | -0.370526525 | 0.0038263 | -0.145334139 | 0.246049  | -0.373829471 | 0.003267 |
| ERN1       | 0.617732925  | 0.0038339 | 0.808226623  | 0.0001504 | 0.786701433  | 0.000227 |
| CHD2       | 0.41505816   | 0.0038444 | 0.068512643  | 0.6333495 | 0.386661524  | 0.007072 |
| QTRT1      | 0.492509403  | 0.0038973 | 0.323932196  | 0.057897  | 0.258356291  | 0.131079 |
| CASP7      | 1.290673038  | 0.0039211 | 1.019202389  | 0.0227533 | 1.219742851  | 0.0064   |
| MRPL35     | -0.325891819 | 0.0039372 | -0.094255863 | 0.3988029 | -0.140575697 | 0.210713 |
| CTDSPL     | -0.28067539  | 0.003953  | -0.324493997 | 0.0008257 | -0.322722825 | 0.000918 |
| DCP1A      | 0.511119256  | 0.0039517 | 0.321298307  | 0.0696424 | 0.098151562  | 0.583952 |
| PSMC2      | -0.245090704 | 0.0039642 | -0.080372707 | 0.3405726 | -0.038002263 | 0.652436 |
| C9orf152   | -0.982848337 | 0.0039747 | -1.199308336 | 0.0004479 | -0.69228403  | 0.040234 |

|            |              |           |              |           |              |          |
|------------|--------------|-----------|--------------|-----------|--------------|----------|
| DNAJC24    | -0.413295994 | 0.0040031 | -0.035501816 | 0.799949  | -0.223809366 | 0.1143   |
| HDHD3      | -0.372006092 | 0.0040212 | -0.59977939  | 3.41E-06  | -0.301011358 | 0.019303 |
| JUP        | 0.470444118  | 0.0040148 | 0.259519559  | 0.1125293 | 0.616847813  | 0.000161 |
| KRT15      | -0.804783078 | 0.0040209 | -1.138155132 | 4.75E-05  | -0.707037013 | 0.011058 |
| ORMDL1     | -0.244326141 | 0.0040197 | -0.016787717 | 0.8404732 | -0.065940653 | 0.431554 |
| MAD2L1     | -0.398709758 | 0.0040458 | -0.000295713 | 0.9982822 | -0.222258164 | 0.106797 |
| TPBG       | 0.58380522   | 0.0040815 | 0.221355171  | 0.2767034 | 0.748597213  | 0.000221 |
| KLF9       | 0.976545664  | 0.0040909 | 0.653690851  | 0.0548535 | 0.68834344   | 0.043352 |
| FANCM      | -0.502005589 | 0.0040992 | -0.332881738 | 0.0537507 | -0.198780515 | 0.250774 |
| ZFP62      | -0.437907286 | 0.0041024 | -0.301049867 | 0.0468526 | -0.199333342 | 0.189426 |
| DENR       | -0.201141717 | 0.0041081 | -0.003665876 | 0.9578905 | -0.093585069 | 0.179304 |
| FAM156B    | -1.09146696  | 0.0041387 | -0.982269221 | 0.0093567 | -1.013266283 | 0.007488 |
| UFL1       | -0.27965746  | 0.0041469 | -0.231514461 | 0.0169623 | -0.126049164 | 0.193548 |
| IGF2BP1    | 0.390192455  | 0.004178  | 0.175773342  | 0.1964568 | 0.108245462  | 0.426718 |
| AKIRIN2    | 0.418152045  | 0.0042026 | 0.306552736  | 0.0343978 | 0.439980814  | 0.002493 |
| YWHAH      | 0.242341517  | 0.0042034 | 0.134889472  | 0.1104033 | 0.495606773  | 3.96E-09 |
| CCDC34     | -0.447864951 | 0.004214  | -0.363699474 | 0.0184568 | -0.40829691  | 0.008687 |
| SF3B4      | 0.281202646  | 0.0042138 | -0.109009714 | 0.2719295 | 0.042679249  | 0.666672 |
| FAM187A    | -0.992323245 | 0.0042202 | -0.951597645 | 0.0057052 | -0.559022633 | 0.100036 |
| ALKBH5     | -0.273017    | 0.0042311 | -0.188914123 | 0.0467607 | -0.009389782 | 0.921159 |
| IL6        | 1.935042331  | 0.0042464 | 1.780636182  | 0.0085308 | 1.4944991    | 0.028158 |
| LIMD2      | 0.654685283  | 0.0042434 | 0.559322116  | 0.0143276 | 0.351674355  | 0.125861 |
| TMEM39A    | 0.437816131  | 0.0042455 | -0.188822687 | 0.2181353 | 0.216272742  | 0.157256 |
| SNAPC4     | 0.434426801  | 0.0042625 | 0.331666973  | 0.0285542 | 0.352689517  | 0.020127 |
| DBI        | -0.338432236 | 0.0043229 | -0.088801179 | 0.452848  | 0.071518185  | 0.545322 |
| RASSF9     | -0.709727893 | 0.0043244 | -0.934451196 | 0.0001711 | -0.747124474 | 0.002603 |
| DMXL1      | 0.329998915  | 0.0043494 | 0.462949527  | 6.08E-05  | 0.42263292   | 0.000251 |
| ELK4       | 0.397189727  | 0.004341  | 0.088068912  | 0.5271894 | 0.185054331  | 0.183895 |
| GJA1       | 0.711543304  | 0.0043443 | 0.507310037  | 0.0420024 | 0.693607536  | 0.005427 |
| SAP30      | -0.440625165 | 0.0043435 | -0.144382506 | 0.3207408 | -0.30755438  | 0.04004  |
| TMEM70     | -0.367229963 | 0.0043497 | -0.372391626 | 0.0034069 | -0.246765619 | 0.05218  |
| FGF23      | 0.816637857  | 0.0043677 | 0.501889968  | 0.0805874 | -0.04800151  | 0.870828 |
| DHRS13     | -0.423242546 | 0.0043756 | -0.491697363 | 0.0009139 | -0.184672975 | 0.204157 |
| LTBP4      | 0.600436524  | 0.0043843 | 0.458424876  | 0.0296241 | 0.30453316   | 0.148862 |
| F816-ZNF32 | -0.600452753 | 0.0043855 | -0.389365936 | 0.0624132 | -0.071913118 | 0.729698 |
| TFF3       | 0.796413756  | 0.0044142 | -0.102553238 | 0.7139889 | 0.905209248  | 0.001212 |
| ZCCHC4     | -0.440224542 | 0.0044143 | -0.127974702 | 0.3945305 | -0.175825076 | 0.246603 |
| C1orf172   | -1.064498739 | 0.0044267 | -1.989172298 | 1.54E-07  | -1.229926396 | 0.001012 |
| NR0B2      | -0.869581826 | 0.0044363 | -1.182145253 | 0.0001114 | -1.036150983 | 0.000701 |
| KCTD10     | 0.320545431  | 0.0044468 | 0.187912568  | 0.0941731 | 0.220306368  | 0.050308 |
| FBXO9      | -0.326491618 | 0.0044601 | -0.113916229 | 0.316486  | -0.151830894 | 0.182477 |
| CBR4       | -0.339700628 | 0.0044676 | -0.186243478 | 0.1130237 | -0.23008754  | 0.051309 |
| SMARCD1    | -0.219006232 | 0.0044656 | -0.010656329 | 0.8888571 | -0.143149011 | 0.061629 |
| GPR39      | -0.660724267 | 0.0044713 | -0.825429454 | 0.000377  | -0.582838339 | 0.011809 |
| LRP11      | -0.302251637 | 0.0044782 | -0.313408428 | 0.0030326 | -0.146108023 | 0.166666 |
| KIF20B     | -0.419857755 | 0.0045089 | -0.064575437 | 0.660178  | -0.16347519  | 0.266478 |
| C3orf38    | -0.245986871 | 0.0045442 | -0.095252134 | 0.2625073 | -0.221383798 | 0.009999 |

|             |              |           |              |           |              |          |
|-------------|--------------|-----------|--------------|-----------|--------------|----------|
| CYCS        | 0.284337836  | 0.0045824 | 0.388613556  | 0.0001024 | 0.576790545  | 8.05E-09 |
| CASZ1       | 0.861284957  | 0.0045986 | 0.570481811  | 0.0615679 | 0.813924594  | 0.007483 |
| FBXO18      | -0.250000935 | 0.0046257 | -0.078434399 | 0.3706965 | -0.159746708 | 0.069027 |
| LRR1        | -0.453342299 | 0.0046413 | -0.329228842 | 0.0384279 | -0.60479568  | 0.000154 |
| IP4-669L17. | 0.865988536  | 0.0046472 | -0.239961897 | 0.4447079 | -0.085731627 | 0.784358 |
| AB019441.2! | -0.844548969 | 0.0046524 | -1.068446171 | 0.000337  | -0.899469458 | 0.002356 |
| YWHAZ       | 0.222275531  | 0.004658  | 0.011671954  | 0.8818558 | 0.325854143  | 3.31E-05 |
| ZNF420      | -0.620153912 | 0.0046553 | -0.755002913 | 0.0005394 | -0.911008855 | 3.00E-05 |
| 3MPR1APS    | 6.388509824  | 0.0046687 | 6.134064621  | 0.0066024 | 6.391125651  | 0.004635 |
| FBXO5       | -0.393807383 | 0.0046637 | -0.196143315 | 0.1548401 | -0.428485345 | 0.002024 |
| USP47       | -0.237178108 | 0.0046658 | -0.072524761 | 0.3854394 | -0.022034852 | 0.792078 |
| FBXO34      | 0.32662844   | 0.0046981 | -0.017254349 | 0.8814797 | 0.311463322  | 0.006941 |
| TLR7        | 1.378022641  | 0.0047247 | 1.533924373  | 0.0013682 | 1.845354543  | 0.000115 |
| ZNF181      | -0.410664477 | 0.0047331 | -0.183071995 | 0.195574  | -0.239816989 | 0.095802 |
| KIAA0556    | 0.542665528  | 0.0047394 | 0.264250638  | 0.1707547 | 0.852287365  | 8.70E-06 |
| NR2F2       | -0.790224147 | 0.0047442 | -0.589077081 | 0.0347933 | -0.783345363 | 0.005078 |
| PEX2        | -0.246713883 | 0.0047582 | -0.082827489 | 0.3381658 | -0.06812405  | 0.432021 |
| MYO10       | 0.459936388  | 0.004777  | 0.537619934  | 0.0009605 | 0.334771838  | 0.039971 |
| GLIPR2      | 0.629541774  | 0.0048054 | 0.187058383  | 0.4032648 | 0.630952355  | 0.00463  |
| NEFM        | 1.948356525  | 0.0048251 | 0.537533429  | 0.4407872 | 0.233825154  | 0.739752 |
| TMEM2       | 0.340956891  | 0.0048384 | 0.118351344  | 0.3280574 | 0.40552464   | 0.000801 |
| USP1        | -0.261350733 | 0.0048597 | -0.202169465 | 0.0286659 | -0.048185313 | 0.601765 |
| RBM26       | -0.268301281 | 0.0048723 | -0.164054964 | 0.0836201 | -0.315176109 | 0.000923 |
| PDS5B       | -0.363547849 | 0.0048879 | -0.056969572 | 0.6573473 | -0.11684467  | 0.363916 |
| ZNF14       | -0.48990459  | 0.0049011 | -0.616909903 | 0.0003653 | -0.527943687 | 0.002299 |
| PFDN4       | -0.397196103 | 0.0049113 | -0.067581748 | 0.6200255 | -0.162326227 | 0.240447 |
| CCDC104     | -0.375221797 | 0.004923  | -0.234262729 | 0.0764639 | -0.116078912 | 0.380401 |
| GADD45B     | 1.018060446  | 0.0049474 | 0.997496883  | 0.0057433 | 1.36135887   | 0.000154 |
| ATG3        | -0.378261028 | 0.0049613 | -0.018817487 | 0.8876488 | -0.020566665 | 0.877519 |
| ZNF782      | -0.528593035 | 0.004981  | -0.319498597 | 0.0811638 | -0.373251618 | 0.044227 |
| CHD9        | -0.319060242 | 0.0049964 | 0.016333179  | 0.885479  | -0.06952591  | 0.539993 |
| PLA2G6      | 0.588432436  | 0.0050003 | 0.069594164  | 0.7416565 | 0.047252938  | 0.824343 |
| KLHL29      | 0.434020856  | 0.005053  | 0.421935813  | 0.0060929 | 0.070973365  | 0.649004 |
| POLR3B      | -0.379686329 | 0.0050581 | 0.047782709  | 0.721179  | 0.044758939  | 0.738144 |
| COX6C       | -0.262807083 | 0.0050729 | -0.025197429 | 0.7852596 | -0.002283234 | 0.980344 |
| UBTF        | -0.337954597 | 0.0050706 | -0.230037708 | 0.0556117 | -0.308750906 | 0.010298 |
| RELA        | 0.669475271  | 0.005077  | 0.703368605  | 0.0032167 | 0.851288248  | 0.000362 |
| PRSS3       | 1.695188593  | 0.0050928 | 1.554362818  | 0.0098122 | 1.811618533  | 0.002477 |
| AHDC1       | 0.70533095   | 0.0051047 | -0.152092482 | 0.5483428 | 0.284953046  | 0.259189 |
| DNAJA1      | 0.375460735  | 0.0051069 | 0.180659115  | 0.1778053 | 0.457383309  | 0.000643 |
| LPAR2       | 0.410213515  | 0.0051012 | 0.168390935  | 0.2508216 | 0.351511755  | 0.016174 |
| LZTFL1      | -0.37456437  | 0.0051106 | -0.259566181 | 0.0513676 | -0.132794257 | 0.318214 |
| ITPR1       | 0.627536209  | 0.0051238 | 0.266783262  | 0.2344389 | 0.331159919  | 0.139548 |
| NKX3-1      | 1.186571732  | 0.0051361 | 1.668311024  | 7.03E-05  | 1.616275888  | 0.000121 |
| PI4K2A      | 0.311320904  | 0.005142  | 0.02636148   | 0.8129822 | 0.078682193  | 0.48076  |
| CD248       | 0.582200443  | 0.0051481 | 0.204569682  | 0.3262912 | -0.078582727 | 0.707429 |
| NXF1        | 0.422999682  | 0.0051735 | 0.250191844  | 0.0989211 | 0.097755014  | 0.519355 |

|          |              |           |              |           |              |          |
|----------|--------------|-----------|--------------|-----------|--------------|----------|
| PRR15    | -0.474693393 | 0.0051786 | -0.675492097 | 6.82E-05  | -0.272129052 | 0.105787 |
| RFT1     | -0.377418797 | 0.005192  | -0.208447265 | 0.1178291 | -0.046119638 | 0.729622 |
| NSMAF    | -0.318270388 | 0.0052026 | -0.045795864 | 0.6837294 | -0.190756479 | 0.090393 |
| CUL4B    | -0.286300279 | 0.0052157 | -0.304948149 | 0.0028751 | -0.322806326 | 0.001612 |
| CYP2R1   | -0.554759059 | 0.0052259 | -0.34635184  | 0.0758722 | -0.463021946 | 0.017746 |
| SLC38A9  | -0.362836896 | 0.0052301 | -0.29053921  | 0.0235887 | -0.003442981 | 0.97848  |
| HIBCH    | -0.530442775 | 0.005243  | -0.343403476 | 0.0696699 | -0.468722098 | 0.013295 |
| RFC4     | -0.527607201 | 0.0052551 | -0.41097572  | 0.028782  | -0.326908811 | 0.08229  |
| CNOT6L   | -0.283998664 | 0.0052816 | -0.226648772 | 0.0245565 | -0.205529793 | 0.042024 |
| CUTC     | -0.481731461 | 0.0052785 | -0.196368449 | 0.2417892 | -0.243198382 | 0.147797 |
| OXA1L    | 0.295580049  | 0.0052808 | -0.09871068  | 0.352896  | -0.119169061 | 0.263019 |
| SEN5     | 0.345325545  | 0.0052704 | 0.33030812   | 0.0075312 | 0.227630799  | 0.065694 |
| SRP14    | -0.432004708 | 0.0052812 | 0.127235296  | 0.4099947 | 0.091560074  | 0.553394 |
| CA8      | 0.928937961  | 0.0053349 | 0.455498821  | 0.1718624 | 0.739560969  | 0.026118 |
| IPCEF1   | 1.413762155  | 0.0053319 | 0.78701071   | 0.1198279 | 0.875606152  | 0.081717 |
| SRSF10   | -0.232651152 | 0.0053388 | -0.034276758 | 0.6806434 | -0.195210978 | 0.019372 |
| CYTIP    | -1.431651507 | 0.005354  | -1.410803014 | 0.0063381 | -0.716554733 | 0.153334 |
| ELAVL1   | 0.240024663  | 0.0053726 | 0.209561009  | 0.014964  | 0.136565907  | 0.113286 |
| ZNF441   | -0.508448251 | 0.0053831 | 0.260983485  | 0.1351356 | -0.559793277 | 0.001963 |
| PNKD     | 0.293643763  | 0.0053888 | -0.085175642 | 0.4217754 | 0.175914685  | 0.095097 |
| CASP6    | -0.360348288 | 0.005398  | -0.259327172 | 0.0423033 | -0.150721285 | 0.237042 |
| RUNX2    | 0.714437029  | 0.0054334 | 0.384917513  | 0.1348684 | 0.899522793  | 0.000404 |
| SLC9A6   | -0.304578027 | 0.0054439 | -0.274069913 | 0.011247  | 0.005389307  | 0.959914 |
| LSM6     | -0.351197241 | 0.0054553 | 0.080357478  | 0.5129983 | -0.171093476 | 0.168532 |
| STAT3    | 0.356578938  | 0.0054704 | 0.194174956  | 0.1302097 | 0.367580752  | 0.004162 |
| TCAIM    | -0.317611843 | 0.0054711 | -0.273271504 | 0.0163254 | -0.148124893 | 0.192226 |
| POLR3K   | -0.548633512 | 0.0054796 | -0.481690811 | 0.0127521 | -0.428460447 | 0.026827 |
| ZNF675   | -0.35134744  | 0.0054787 | -0.298622156 | 0.0166273 | -0.350389365 | 0.005281 |
| AGPS     | -0.346132931 | 0.0054911 | -0.22345414  | 0.0723242 | -0.024231407 | 0.845329 |
| ZMYND19  | -0.366690224 | 0.0054988 | -0.447662668 | 0.0006477 | -0.363074637 | 0.005692 |
| C1QL1    | 1.178424504  | 0.005513  | 1.077987466  | 0.0106217 | 0.121253366  | 0.787501 |
| DHX16    | -0.363623772 | 0.0055359 | -0.175446568 | 0.1782353 | -0.2795134   | 0.032325 |
| FKBP1A   | 0.379985798  | 0.0055228 | 0.182069109  | 0.1837943 | 0.359712122  | 0.008567 |
| GIT2     | -0.33164416  | 0.0055202 | -0.219181324 | 0.0638366 | -0.394301381 | 0.000953 |
| HCCS     | 0.339486626  | 0.0055357 | 0.128085124  | 0.2915461 | 0.39617937   | 0.001072 |
| PCDH19   | 1.480056172  | 0.0055289 | 0.10952095   | 0.8389652 | 1.305665103  | 0.013765 |
| PLK1     | -0.755379944 | 0.0055238 | -0.224095615 | 0.4074037 | -0.383860681 | 0.156812 |
| RAB34    | 0.349569879  | 0.0055077 | 0.154520412  | 0.2194607 | 0.144334435  | 0.251919 |
| UHMK1    | -0.18010135  | 0.0055311 | -0.232374837 | 0.0003223 | -0.196980545 | 0.002323 |
| PEX19    | 0.27052002   | 0.0055548 | -0.137276481 | 0.1586357 | 0.024475432  | 0.801704 |
| ZCCHC9   | -0.342379823 | 0.0055653 | -0.168733984 | 0.1664526 | -0.250859412 | 0.040968 |
| HOXB7    | -0.820276024 | 0.0055837 | -0.68601015  | 0.019208  | -1.442362202 | 1.86E-06 |
| ZNF260   | -0.324476698 | 0.0056122 | -0.351273752 | 0.0026098 | -0.516655407 | 1.06E-05 |
| BORA     | -0.681167755 | 0.0056187 | -0.675931859 | 0.0057228 | -0.772693597 | 0.001667 |
| ZNRF3    | -0.46622953  | 0.0056219 | -0.04681942  | 0.7767949 | -0.31356589  | 0.059864 |
| AMMECR1L | 0.191814011  | 0.005635  | -0.070889751 | 0.3069116 | 0.167112473  | 0.015243 |
| CDC42    | 0.208807533  | 0.0056547 | 0.13601824   | 0.0712644 | 0.235201079  | 0.001806 |

|            |              |           |              |           |              |          |
|------------|--------------|-----------|--------------|-----------|--------------|----------|
| ZYX        | 0.529488336  | 0.0056507 | 0.309560042  | 0.1058227 | -0.001269152 | 0.994721 |
| CCNG2      | 0.503833084  | 0.0056968 | 0.434906613  | 0.0168346 | 0.71340786   | 8.72E-05 |
| DTNB       | -0.556769621 | 0.0057007 | -0.136148196 | 0.4960434 | 0.060942723  | 0.760219 |
| ADTRP      | 1.223618377  | 0.0057192 | 0.977363643  | 0.0256345 | 1.759965141  | 3.18E-05 |
| BLOC1S5    | -0.384216716 | 0.0057163 | -0.738744806 | 1.03E-07  | -0.346093353 | 0.012357 |
| P11-261C1C | 0.915660998  | 0.0057118 | 0.265001709  | 0.4324156 | 0.031876824  | 0.926153 |
| GOS2       | 1.014751849  | 0.0057696 | 0.379770389  | 0.3050521 | 1.372187179  | 0.000171 |
| C12orf44   | 0.37414745   | 0.0058019 | 0.221237859  | 0.1026954 | 0.334671296  | 0.013475 |
| TJP1       | 0.363112029  | 0.0058343 | 0.290768857  | 0.0271344 | 0.465374381  | 0.000403 |
| ID1        | -0.601733632 | 0.0058537 | -0.371321559 | 0.0882383 | -0.213416822 | 0.327012 |
| ATXN2L     | 0.415652341  | 0.0058639 | -0.12557785  | 0.4069021 | -0.133667902 | 0.378555 |
| ZNF329     | -0.335317681 | 0.0058625 | -0.534720133 | 1.03E-05  | -0.588376294 | 1.54E-06 |
| MDH2       | 0.361542388  | 0.0059023 | 0.090842708  | 0.4886633 | 0.128773708  | 0.326512 |
| PRDX3P1    | 1.209971026  | 0.0059074 | 1.173610367  | 0.0068976 | 1.27246105   | 0.003395 |
| AP1G1      | 0.196203377  | 0.0059232 | -0.159306503 | 0.0252857 | 0.035570848  | 0.616978 |
| AMN1       | -0.355347777 | 0.0059365 | -0.214848458 | 0.0909403 | -0.286995871 | 0.024879 |
| RNF135     | -0.537533989 | 0.0059374 | -0.041057293 | 0.8275716 | -0.083718214 | 0.657877 |
| TMEM163    | 0.614325522  | 0.0059291 | 0.08576546   | 0.7016939 | 0.582989804  | 0.008949 |
| CREB5      | 1.047966471  | 0.0059462 | 0.568156625  | 0.1364244 | 1.011200935  | 0.00796  |
| RPP25      | -0.650532268 | 0.0059671 | 0.081033551  | 0.7228213 | -0.126798585 | 0.582226 |
| WDFY1      | -0.190548795 | 0.0059852 | -0.154355755 | 0.0253349 | -0.054474811 | 0.429593 |
| WSB2       | 0.296138307  | 0.0060017 | -0.017073285 | 0.8741522 | 0.10407683   | 0.334414 |
| LRRC45     | -0.497672903 | 0.0060175 | -0.591413962 | 0.0010534 | -0.338254338 | 0.058018 |
| CCDC169    | 0.767276939  | 0.0060236 | 1.122446907  | 3.96E-05  | 0.721853242  | 0.0088   |
| GOLPH3     | 0.348772224  | 0.0060423 | 0.164579731  | 0.1950006 | 0.326276376  | 0.01017  |
| ICA1L      | 0.766630723  | 0.0060383 | 0.861468166  | 0.0018309 | 0.365674147  | 0.189699 |
| RCN1       | 0.354504241  | 0.0060753 | 0.098691457  | 0.4445309 | 0.159008767  | 0.21821  |
| SF3B5      | 0.304347184  | 0.00607   | 0.042559918  | 0.701375  | 0.147042616  | 0.185123 |
| UPF3A      | -0.349902695 | 0.0060748 | -0.065359096 | 0.604468  | -0.21503021  | 0.089566 |
| ABHD13     | -0.234297136 | 0.0060966 | -0.268306513 | 0.0015205 | -0.298663659 | 0.00045  |
| GRB14      | -0.745182107 | 0.006135  | -0.501203934 | 0.0613616 | -0.546063003 | 0.042663 |
| KPNA4      | 0.238002196  | 0.0061682 | 0.240739957  | 0.0055466 | 0.341395074  | 8.39E-05 |
| ZNF131     | -0.319754336 | 0.0061666 | -0.128786904 | 0.266623  | -0.28185695  | 0.015392 |
| CERKL      | -0.597084546 | 0.0062152 | 0.266949612  | 0.1993285 | -0.201860514 | 0.346409 |
| DOT1L      | 0.465853932  | 0.0062289 | 0.059903217  | 0.7254939 | 0.284194212  | 0.095704 |
| NRAS       | 0.187655581  | 0.0062514 | 0.112492877  | 0.1001957 | 0.268194207  | 8.74E-05 |
| ABHD15     | -0.512345941 | 0.0062716 | -0.638816513 | 0.0006163 | -0.203997241 | 0.268099 |
| CLDN18     | 0.761330035  | 0.0062737 | 0.077066276  | 0.7820537 | 1.104804273  | 7.30E-05 |
| FA2H       | 0.640297308  | 0.0062906 | -0.09121376  | 0.6980704 | 0.457372181  | 0.050815 |
| TNFRSF19   | -0.632598477 | 0.0063062 | -0.524838199 | 0.0228714 | -1.183427423 | 3.81E-07 |
| TRMT13     | -0.409031397 | 0.0063124 | -0.046853301 | 0.7516002 | -0.043794304 | 0.767515 |
| P11-691N7  | 1.691180635  | 0.0063497 | 1.766336204  | 0.0041283 | 1.440128796  | 0.020432 |
| LRRC37A3   | -0.741930917 | 0.0063572 | -0.153145477 | 0.5677736 | -0.323557495 | 0.230365 |
| PSPC1      | -0.405577638 | 0.0063828 | -0.073057916 | 0.6176388 | -0.133127226 | 0.36558  |
| STEAP4     | 0.909614228  | 0.0064106 | 1.10898926   | 0.0008345 | 1.847205388  | 2.06E-08 |
| NFE2       | -1.312270306 | 0.0064404 | -1.313846567 | 0.006108  | -1.712774484 | 0.000407 |
| VWA7       | 0.760003078  | 0.006439  | 0.540415685  | 0.0544961 | 0.517728355  | 0.065008 |

|            |              |           |              |           |              |          |
|------------|--------------|-----------|--------------|-----------|--------------|----------|
| C16orf46   | 0.702934828  | 0.0064522 | 0.26434964   | 0.3188449 | 0.19752865   | 0.458263 |
| CTU2       | 0.605856252  | 0.006484  | 0.268946063  | 0.2298683 | 0.388619716  | 0.080886 |
| EIF4G3     | 0.225374226  | 0.0064898 | 0.17795925   | 0.0307556 | 0.132345582  | 0.10941  |
| .36A-HNRN1 | -1.882975584 | 0.0064952 | -0.396780189 | 0.5351991 | 0.19499779   | 0.758043 |
| DNASE1L1   | 0.653453887  | 0.0065081 | 0.001128872  | 0.9962445 | 0.314172373  | 0.188701 |
| CSTB       | 0.615567212  | 0.0065133 | 0.56911039   | 0.0119019 | 1.171683133  | 2.19E-07 |
| CRLS1      | -0.292013851 | 0.0065258 | -0.106771314 | 0.3143027 | 0.012471971  | 0.906524 |
| FER1L6     | 0.666447604  | 0.0065566 | -0.058063839 | 0.8128783 | 0.913857957  | 0.000192 |
| NSMF       | 0.475116175  | 0.0065711 | 0.063706503  | 0.7164501 | 0.03964168   | 0.821524 |
| ARHGAP31   | 0.953798153  | 0.006591  | 0.822122879  | 0.0191183 | 0.693692771  | 0.048352 |
| TMEM167A   | -0.364604798 | 0.006602  | -0.152272913 | 0.2559725 | -0.238704168 | 0.075144 |
| DCP1B      | -0.40955645  | 0.0066156 | -0.314296094 | 0.0350393 | -0.621611796 | 4.39E-05 |
| RPL28      | 0.39934328   | 0.0066164 | 0.168133648  | 0.2529142 | 0.358270296  | 0.014827 |
| JOSD1      | 0.378215899  | 0.0066353 | 0.048472642  | 0.7277019 | 0.421070164  | 0.002463 |
| RNF170     | -0.305178174 | 0.006672  | -0.206415196 | 0.0637351 | -0.217678431 | 0.052103 |
| IRX5       | -0.938893629 | 0.0067091 | -1.353870898 | 0.0001062 | -0.3888526   | 0.247615 |
| GRAMD3     | 0.505794554  | 0.0067453 | 0.303708319  | 0.1037191 | 0.768862662  | 3.28E-05 |
| SPRTN      | -0.392109957 | 0.0067673 | -0.469808183 | 0.0011158 | -0.609394391 | 2.50E-05 |
| MST1R      | 0.651905517  | 0.0067952 | -0.171352067 | 0.4783885 | 0.782564627  | 0.001081 |
| TSEN2      | -0.664453881 | 0.0068117 | -0.234723466 | 0.3355023 | -0.189945071 | 0.436079 |
| ZNF436     | -0.461957278 | 0.0068655 | -0.264066909 | 0.1207379 | -0.247972243 | 0.145349 |
| IRF3       | 0.325048055  | 0.0068979 | 0.212409064  | 0.0773103 | 0.286825518  | 0.016753 |
| KCMF1      | 0.36963595   | 0.006904  | 0.16392969   | 0.2299165 | 0.5206689    | 0.000135 |
| LRCH4      | 0.528494099  | 0.0068996 | -0.035622443 | 0.8563399 | -0.057618955 | 0.770061 |
| STAG3      | -0.647371766 | 0.0069141 | -0.347916189 | 0.1387469 | -0.684062465 | 0.004272 |
| SLC15A4    | 0.492900006  | 0.0069225 | 0.489126221  | 0.0069664 | 0.90671461   | 4.34E-07 |
| DOPEY1     | -0.325287624 | 0.0069403 | -0.18255039  | 0.1285756 | -0.213046221 | 0.076344 |
| ZNF41      | -0.329557396 | 0.0069735 | -0.200623034 | 0.0954768 | -0.175139951 | 0.144326 |
| CXorf40A   | -0.490179297 | 0.0069934 | -0.402563404 | 0.024731  | -0.347013495 | 0.053913 |
| DIDO1      | -0.205555332 | 0.0069981 | -0.151548196 | 0.0457098 | -0.220783603 | 0.003708 |
| RANBP3     | 0.339881142  | 0.0069936 | 0.201590656  | 0.1088742 | -0.029924759 | 0.812245 |
| PTCD3      | -0.204291415 | 0.0070067 | -0.074027145 | 0.3253686 | -0.177373106 | 0.019031 |
| AC005042.2 | 1.127131805  | 0.0070611 | 0.909470909  | 0.0295868 | 1.215588711  | 0.003373 |
| MANEA      | -0.47996455  | 0.007079  | -0.360610243 | 0.0415612 | -0.261302178 | 0.140527 |
| MAP1S      | 0.622632832  | 0.0070976 | 0.083538041  | 0.7183289 | -0.035196744 | 0.879224 |
| ZNF250     | -0.466373643 | 0.0071028 | -0.151977559 | 0.375331  | -0.245252858 | 0.155425 |
| RAP2A      | -0.200258774 | 0.0071169 | -0.155942584 | 0.0340821 | -0.244057395 | 0.000981 |
| AP1B1      | 0.279291738  | 0.0071599 | 0.138669983  | 0.1811639 | 0.349512642  | 0.000739 |
| SPAG7      | -0.19003017  | 0.0071681 | -0.091592502 | 0.1876687 | -0.028166078 | 0.685356 |
| IKZF3      | 0.590524488  | 0.007206  | 0.892708917  | 3.70E-05  | 0.861351056  | 6.96E-05 |
| MICALL1    | 0.345429177  | 0.0072054 | -0.047062325 | 0.7133948 | 0.309779888  | 0.015506 |
| PDLIM5     | 0.377833916  | 0.0072176 | 0.238263791  | 0.0900571 | 0.405968289  | 0.003873 |
| TMEM65     | -0.217460264 | 0.0072307 | -0.112322658 | 0.1565008 | -0.121915404 | 0.126389 |
| NR4A2      | 0.958830541  | 0.0072381 | 0.244733476  | 0.4969287 | 1.07598347   | 0.002499 |
| NDUFB3     | -0.289720043 | 0.0072451 | 0.060671184  | 0.5647196 | 0.06826753   | 0.518364 |
| GAREM      | 0.421594321  | 0.007251  | 0.372501954  | 0.0176859 | 0.420534243  | 0.007353 |
| BRMS1      | -0.290809414 | 0.0072785 | -0.242674962 | 0.0229505 | -0.059773049 | 0.573136 |



|            |              |           |              |           |              |          |
|------------|--------------|-----------|--------------|-----------|--------------|----------|
| C2orf69    | -0.253062719 | 0.0072747 | -0.299251085 | 0.0013201 | -0.230559814 | 0.013486 |
| PRR22      | 0.676090737  | 0.0073053 | 0.008342975  | 0.9745661 | 0.480286219  | 0.057439 |
| P11-466H18 | 0.371591801  | 0.0073049 | 0.305864007  | 0.0271381 | 0.338785276  | 0.014413 |
| PRKD2      | 0.428955171  | 0.0073139 | 0.250188542  | 0.1180372 | -0.01107415  | 0.944962 |
| ACSL4      | 0.525602075  | 0.0073266 | 0.581073517  | 0.0030214 | 0.71186178   | 0.000279 |
| F3         | 1.300030341  | 0.0073304 | 1.363922343  | 0.0048828 | 2.357685055  | 1.12E-06 |
| RPS19BP1   | -0.338837234 | 0.007331  | -0.496432648 | 7.85E-05  | -0.371546233 | 0.003229 |
| P1-130H16  | 0.602303535  | 0.0073591 | 0.182296281  | 0.420978  | 0.470724684  | 0.03613  |
| P11-274B21 | 0.96286762   | 0.0073684 | -0.230696843 | 0.5460088 | 0.395365026  | 0.282462 |
| ZNF286A    | 0.32263333   | 0.0073695 | 0.259121737  | 0.030995  | 0.370969673  | 0.002045 |
| TTC30A     | -0.334547121 | 0.0074047 | -0.155301878 | 0.203908  | -0.193458964 | 0.115853 |
| USP22      | 0.234203897  | 0.0074018 | 0.176123448  | 0.043855  | 0.155710739  | 0.074873 |
| DHX15      | 0.185131176  | 0.0074211 | 0.22400269   | 0.0011726 | 0.249497519  | 0.0003   |
| DUT        | -0.42147162  | 0.0074976 | -0.275389887 | 0.0786477 | -0.145350238 | 0.351651 |
| NSD1       | -0.23613176  | 0.0075117 | -0.098526817 | 0.2628096 | -0.114571971 | 0.193612 |
| DGAT2      | 0.612289658  | 0.0075206 | 0.608689205  | 0.0075624 | 0.440371585  | 0.054775 |
| ZIK1       | -0.454414356 | 0.0075376 | -0.556437125 | 0.0010425 | -0.558937074 | 0.001024 |
| SMAD1      | 0.575568074  | 0.0075487 | 0.99885357   | 3.19E-06  | 0.862741288  | 5.94E-05 |
| ANKRD65    | -1.549980581 | 0.0075542 | -1.875799797 | 0.001254  | -0.453940944 | 0.398186 |
| ARL15      | -0.550457832 | 0.007574  | -0.007723591 | 0.9696886 | 0.150067367  | 0.460578 |
| APEX2      | 0.306472538  | 0.0075975 | 0.141828041  | 0.2159002 | 0.052670446  | 0.646475 |
| ACTR2      | 0.195869519  | 0.0076227 | 0.024124199  | 0.7420763 | 0.183945412  | 0.012036 |
| LSM11      | -0.223935703 | 0.0076901 | -0.321169749 | 0.0001046 | -0.330354102 | 7.98E-05 |
| C19orf53   | 0.205541241  | 0.0077057 | -0.028643109 | 0.7102802 | 0.043967982  | 0.568874 |
| MIA2       | -0.885805783 | 0.0077102 | -0.018286696 | 0.9548258 | -0.601857496 | 0.066998 |
| NOC4L      | 0.565773323  | 0.0077287 | 0.403900669  | 0.0567657 | 0.572467414  | 0.006805 |
| IL17RE     | -0.63728658  | 0.0077875 | -0.535580445 | 0.0251761 | -0.123679951 | 0.604042 |
| CAPRIN1    | 0.186056845  | 0.007798  | 0.187760112  | 0.0071864 | 0.186913235  | 0.007486 |
| CCNB1      | -0.542368931 | 0.007822  | -0.296595353 | 0.1449092 | -0.418616296 | 0.03979  |
| FAM213A    | -0.276293816 | 0.0078214 | -0.205688876 | 0.0456945 | -0.13138486  | 0.202337 |
| HSBP1L1    | -0.422225792 | 0.0078226 | -0.292370666 | 0.0617055 | -0.227796036 | 0.14585  |
| AC004057.1 | 1.048926111  | 0.0078378 | 1.227655869  | 0.0018488 | 1.086969767  | 0.005851 |
| CCNA2      | -0.461677657 | 0.007865  | 0.034939692  | 0.8389249 | -0.115060324 | 0.504514 |
| FAM46B     | -0.781081989 | 0.007863  | -1.209985322 | 5.48E-05  | -1.381486918 | 8.13E-06 |
| SRF        | 0.262831741  | 0.0078707 | 0.00231585   | 0.9813291 | 0.018577945  | 0.851418 |
| GMPR2      | -0.301793169 | 0.0078906 | -0.241729094 | 0.032653  | -0.306735395 | 0.006861 |
| ARMC1      | -0.236990956 | 0.0079117 | -0.275915774 | 0.0017961 | -0.168019989 | 0.057425 |
| AUH        | -0.479800056 | 0.0079353 | -0.242352434 | 0.1739447 | -0.132183248 | 0.460026 |
| ZNF470     | -0.350522021 | 0.007943  | 0.02530675   | 0.8455889 | -0.251702859 | 0.054025 |
| SMEK1      | -0.191632466 | 0.0079679 | -0.154904989 | 0.0314756 | -0.161119136 | 0.025389 |
| STOML1     | 0.589946436  | 0.0080063 | 0.081805918  | 0.7129642 | 0.60248535   | 0.006663 |
| SNRPB2     | -0.253612858 | 0.0080184 | -0.015449446 | 0.8703002 | -0.015326018 | 0.871374 |
| XDH        | 0.7384313    | 0.0080673 | 0.632801583  | 0.022784  | 0.548209919  | 0.048201 |
| AC024560.3 | -0.377146549 | 0.0080735 | -0.329951167 | 0.0185815 | -0.401449507 | 0.004581 |
| PPWD1      | -0.294188159 | 0.0080817 | -0.223017567 | 0.0426964 | -0.201882705 | 0.067389 |
| DNMT3B     | -0.483019041 | 0.008178  | -0.215261017 | 0.221009  | -0.476463394 | 0.008086 |
| CBX4       | -0.712455461 | 0.0082241 | -0.552819    | 0.0387459 | -0.722942628 | 0.007256 |

|           |              |           |              |           |              |          |
|-----------|--------------|-----------|--------------|-----------|--------------|----------|
| CPHL1P    | 0.912580225  | 0.008229  | 0.291136503  | 0.3992921 | 1.292524399  | 0.000155 |
| FNDC1     | 1.479176984  | 0.0082242 | 0.784102418  | 0.1638672 | 1.598414856  | 0.004178 |
| TTK       | -0.497779795 | 0.0082334 | -0.114759821 | 0.5399086 | -0.143117297 | 0.445571 |
| SLC25A6   | 0.327079216  | 0.0082533 | 0.111956624  | 0.3657186 | 0.178998073  | 0.148223 |
| DCLK3     | 1.667263214  | 0.0082624 | 1.516964615  | 0.0154675 | 2.12595926   | 0.000656 |
| THAP3     | -0.489541139 | 0.0083115 | -0.337240713 | 0.066095  | -0.635055561 | 0.000783 |
| MALSU1    | -0.291252428 | 0.0083298 | -0.091599939 | 0.3935933 | -0.274352476 | 0.011005 |
| ZNF146    | -0.21017967  | 0.008332  | -0.190370141 | 0.0165363 | -0.094348106 | 0.234835 |
| CLN8      | 0.421439124  | 0.0083386 | 0.056614741  | 0.7231201 | 0.325862995  | 0.041428 |
| TD-2623N2 | -0.881252106 | 0.0083612 | -0.704949143 | 0.02849   | -0.701860096 | 0.030501 |
| TMEM179B  | 0.331657933  | 0.008358  | 0.015946434  | 0.8986281 | 0.277046157  | 0.026228 |
| UTP6      | 0.279144525  | 0.0083647 | 0.080579112  | 0.4440857 | 0.112340219  | 0.286314 |
| HRSP12    | -0.348186173 | 0.0083855 | -0.046270927 | 0.7172024 | -0.121668978 | 0.346081 |
| THUMPD3   | -0.333917657 | 0.0083967 | -0.162465059 | 0.1964029 | -0.182174883 | 0.148579 |
| ZNF655    | 0.179125859  | 0.0083974 | 0.091715709  | 0.1754595 | 0.21645023   | 0.001384 |
| IPO8      | -0.436792971 | 0.0084386 | -0.182312133 | 0.268919  | -0.398636219 | 0.015813 |
| DACT2     | -0.922161453 | 0.0084529 | -0.543694355 | 0.1137201 | -0.517287264 | 0.132986 |
| AOC2      | 0.867898889  | 0.0084723 | 0.010564289  | 0.9753381 | -0.092628193 | 0.789116 |
| CYP3A7    | 1.189132771  | 0.00848   | 0.942671103  | 0.0376995 | 1.654566442  | 0.000181 |
| ANKRD50   | 0.38442838   | 0.0085325 | 0.229601183  | 0.1159492 | 0.280127136  | 0.055193 |
| ZNF549    | -0.380375765 | 0.0085296 | -0.35758518  | 0.0126466 | -0.557483507 | 0.000117 |
| TOMM34    | 0.283538031  | 0.0085482 | 0.379163775  | 0.0003833 | 0.480840257  | 6.66E-06 |
| MCL1      | 0.394799511  | 0.0085717 | 0.26634966   | 0.0761197 | 0.630638475  | 2.64E-05 |
| ZNF140    | 0.327046065  | 0.0085878 | 0.208572178  | 0.0929938 | 0.40728745   | 0.001012 |
| MED29     | 0.94860575   | 0.0085963 | 0.239866795  | 0.5114315 | 0.737407882  | 0.039763 |
| RIMKLB2   | -1.094427313 | 0.0086068 | -0.278774125 | 0.4369549 | -0.521708839 | 0.162993 |
| ZNF510    | -0.347929822 | 0.0086217 | -0.355460875 | 0.0067293 | -0.471835081 | 0.00037  |
| USF2      | -0.325554222 | 0.0087492 | -0.111237493 | 0.3661102 | -0.06345195  | 0.606525 |
| TTC3      | -0.200335154 | 0.0087615 | -0.313935219 | 3.95E-05  | -0.203623884 | 0.007683 |
| HMMR      | -0.544415944 | 0.0087747 | -0.116150656 | 0.572726  | -0.221968733 | 0.282402 |
| SH2D3A    | 0.403717614  | 0.0087765 | 0.227122052  | 0.1401638 | 0.604533774  | 8.09E-05 |
| POP7      | -0.309322224 | 0.0087906 | -0.326647894 | 0.0049526 | -0.330042698 | 0.004771 |
| USP45     | -0.463481727 | 0.0087867 | 0.057435236  | 0.741234  | -0.192622223 | 0.270123 |
| NEDD1     | -0.275880486 | 0.0088062 | 0.092762333  | 0.371006  | 0.082609824  | 0.42649  |
| FOSB      | 1.432174216  | 0.008838  | 1.065448231  | 0.0515262 | 0.296709708  | 0.592913 |
| ARHGAP12  | -0.263227546 | 0.0088748 | -0.372810903 | 0.0002051 | -0.186779345 | 0.06251  |
| BYSL      | 0.456300929  | 0.0088604 | 0.052950187  | 0.7623415 | 0.188318925  | 0.282169 |
| RUNDC1    | -0.280983829 | 0.0088651 | -0.415235182 | 0.0001059 | -0.419532347 | 9.56E-05 |
| SERF2     | 0.26628851   | 0.0088636 | -0.03835377  | 0.7062956 | 0.343869642  | 0.000717 |
| ZNF214    | -0.752286636 | 0.0088729 | -0.397845811 | 0.1555727 | -0.526445923 | 0.06936  |
| ZNF704    | 0.628784961  | 0.008868  | 0.543982131  | 0.0234481 | 0.732949734  | 0.002258 |
| MTIF2     | -0.380613083 | 0.0089155 | -0.175727514 | 0.223048  | -0.297697427 | 0.039566 |
| PLTP      | 0.451965329  | 0.0089327 | -0.129355348 | 0.455659  | 0.278783985  | 0.106873 |
| RCN2      | -0.245562467 | 0.0089456 | 0.106203228  | 0.2533145 | -0.086982002 | 0.352001 |
| ALDH7A1   | -0.396428014 | 0.0089818 | -0.09561005  | 0.5256927 | 0.020575334  | 0.891537 |
| ATP5SL    | 0.35501379   | 0.0089926 | -0.001733508 | 0.9898464 | -0.00753476  | 0.955975 |
| IFT172    | 0.417975292  | 0.0089925 | -0.03047615  | 0.8486746 | 0.06573001   | 0.68172  |

|          |              |           |              |           |              |          |
|----------|--------------|-----------|--------------|-----------|--------------|----------|
| VGLL4    | 0.233519552  | 0.0089835 | -0.005425651 | 0.9513867 | 0.091429792  | 0.304123 |
| FOXL1    | 0.746240007  | 0.0090453 | 1.470750263  | 2.02E-07  | 1.290905402  | 5.49E-06 |
| GKN2     | -3.563529996 | 0.0090413 | -2.609252282 | 0.0541715 | -0.882312377 | 0.513684 |
| NDUFA4   | 0.260354633  | 0.0090568 | 0.1851605    | 0.0630304 | 0.157415277  | 0.114352 |
| TAF10    | 0.360795815  | 0.0090602 | 0.429479995  | 0.0017657 | 0.515845019  | 0.000173 |
| TP53BP2  | 0.384051329  | 0.0090631 | 0.510657872  | 0.0005115 | 0.741213906  | 4.46E-07 |
| ZMIZ2    | 0.379441006  | 0.0090614 | 0.046626445  | 0.7492356 | 0.048723521  | 0.739112 |
| CKAP2    | -0.395869339 | 0.0090725 | -0.189722542 | 0.2098714 | -0.428978652 | 0.004653 |
| TWF1     | -0.248521939 | 0.0090755 | -0.076330645 | 0.421876  | 0.05528225   | 0.560617 |
| MTERFD3  | -0.391200522 | 0.0090841 | -0.333209022 | 0.0242413 | -0.315354421 | 0.033411 |
| SYDE1    | 0.645407937  | 0.0090994 | 0.240010335  | 0.3319505 | 0.091315914  | 0.713209 |
| PDLIM3   | 0.781355277  | 0.00912   | -0.348113376 | 0.2533074 | 0.249638201  | 0.407939 |
| DIAPH1   | 0.48072616   | 0.0091668 | 0.043306577  | 0.8146898 | 0.429354659  | 0.01992  |
| TOR1B    | 0.361440859  | 0.009168  | 0.186387289  | 0.1789919 | 0.303427261  | 0.027843 |
| ZNF24    | -0.191546842 | 0.0092028 | -0.379379473 | 2.42E-07  | -0.284498335 | 0.000108 |
| HLA-A    | 0.401013842  | 0.0092594 | 0.015029724  | 0.9223363 | 0.070324561  | 0.64829  |
| WBP5     | -0.248049812 | 0.0092664 | -0.072919773 | 0.4390485 | 0.076726064  | 0.414988 |
| ZNF641   | 0.422023154  | 0.0092728 | 0.167594699  | 0.300686  | 0.479501852  | 0.003085 |
| FHL3     | 0.492533363  | 0.0093297 | 0.240282177  | 0.2048408 | 0.372200479  | 0.049867 |
| RRP36    | -0.238742494 | 0.0093384 | -0.031732308 | 0.7249103 | -0.014775539 | 0.870205 |
| RHBDD2   | 0.326726961  | 0.0093659 | 0.179220999  | 0.1553216 | 0.494065646  | 8.38E-05 |
| ADAMTS1  | 0.353803829  | 0.0093861 | -0.022318836 | 0.8701273 | -0.144179667 | 0.291159 |
| HSPA1A   | 0.469554103  | 0.0094147 | 0.421212611  | 0.0197968 | 0.546919342  | 0.00248  |
| PRKX     | -0.40932822  | 0.0094341 | -0.173280839 | 0.2693382 | -0.114505522 | 0.466494 |
| PSMB10   | 0.335007612  | 0.0094919 | -0.119752104 | 0.3579253 | 0.368570679  | 0.003848 |
| IFI35    | 0.431801162  | 0.0095052 | 0.327742644  | 0.0475352 | 0.319648903  | 0.052876 |
| MRPS35   | -0.343340504 | 0.0095019 | -0.316445459 | 0.016523  | -0.058988612 | 0.654381 |
| CDC48    | -0.47836373  | 0.0095298 | -0.37598029  | 0.0405261 | -0.319361219 | 0.082085 |
| MTUS1    | -0.419727371 | 0.00952   | -0.505709976 | 0.0017782 | -0.474925513 | 0.003337 |
| ZNF688   | -0.623721535 | 0.0095266 | -0.235087428 | 0.3164667 | -0.137954669 | 0.559647 |
| MED25    | 0.389691047  | 0.0096263 | -0.132548681 | 0.3827034 | -0.048604185 | 0.75031  |
| METTL17  | -0.241215547 | 0.0096343 | -0.185646917 | 0.043854  | -0.355436161 | 0.000125 |
| SOWAHA   | -0.723340289 | 0.0096476 | -0.272738274 | 0.3144315 | -0.242542214 | 0.372166 |
| FBRSL1   | 0.658559018  | 0.0096646 | 0.306654068  | 0.2283265 | 0.568258721  | 0.025735 |
| SLC43A2  | 0.707225931  | 0.0097115 | 0.35145244   | 0.1983862 | 0.215385242  | 0.43331  |
| ARMC10   | -0.248397876 | 0.0097517 | -0.247002331 | 0.0092155 | -0.281680339 | 0.003237 |
| DFNA5    | -0.676280083 | 0.0097317 | -0.032157259 | 0.9003077 | -0.433895188 | 0.094998 |
| GK5      | -0.400844225 | 0.0097549 | 0.027883244  | 0.8557699 | -0.183013862 | 0.233534 |
| GPATCH2L | 0.269432619  | 0.0097664 | 0.05586624   | 0.5918323 | 0.156953446  | 0.132673 |
| RBM25    | 0.232557623  | 0.009776  | 0.00012312   | 0.9989083 | 0.072394181  | 0.421143 |
| RHBDF1   | 0.429028021  | 0.0097745 | 0.157217358  | 0.3445757 | 0.417097322  | 0.011943 |
| UNKL     | 0.875445843  | 0.0097513 | 0.785047548  | 0.0197768 | 0.242517489  | 0.473686 |
| UTP20    | 0.259057367  | 0.0097699 | 0.214856788  | 0.0312508 | 0.302379152  | 0.002437 |
| ZADH2    | -0.399689862 | 0.009751  | -0.23083584  | 0.1316755 | -0.359271696 | 0.019688 |
| ZBTB44   | -0.210814155 | 0.0097357 | -0.057204258 | 0.4790936 | -0.018337524 | 0.820853 |
| PRPSAP1  | -0.330737933 | 0.0098347 | -0.137685254 | 0.2774392 | -0.191064473 | 0.134099 |
| ATXN1L   | 0.209915197  | 0.0098644 | 0.026963632  | 0.740603  | 0.036496176  | 0.654547 |

|            |              |           |              |           |              |          |
|------------|--------------|-----------|--------------|-----------|--------------|----------|
| STRIP1     | 0.334233307  | 0.0098751 | 0.259616732  | 0.0448668 | 0.235986522  | 0.068757 |
| ASUN       | -0.372989824 | 0.0099194 | -0.130187077 | 0.3646327 | -0.060356555 | 0.674655 |
| MOB4       | -0.297618267 | 0.0099394 | -0.298283388 | 0.0093818 | -0.129543199 | 0.258766 |
| CMC1       | -0.489839901 | 0.0099537 | -0.469669884 | 0.0117345 | -0.278842064 | 0.138726 |
| P11-644F5. | -0.631044915 | 0.0099892 | -0.125917959 | 0.5957796 | -0.277252352 | 0.245862 |
| ZNF12      | -0.27247704  | 0.0100066 | -0.031608108 | 0.7632561 | 0.00696799   | 0.947128 |
| MTX3       | -0.373915523 | 0.0100415 | -0.26495766  | 0.0637146 | -0.284939456 | 0.047423 |
| SELK       | 0.472544211  | 0.0100438 | 0.089241041  | 0.6276321 | 0.367106309  | 0.045462 |
| CAMK1G     | 0.865241452  | 0.0100745 | 0.400945493  | 0.2433277 | 0.641717263  | 0.054111 |
| EXOC1      | -0.311303264 | 0.010104  | -0.286016902 | 0.0177739 | -0.297802139 | 0.013744 |
| LGMNP1     | -0.737066936 | 0.0100914 | -0.194349587 | 0.4696228 | 0.156677471  | 0.553794 |
| SCYL3      | -0.235114979 | 0.0100919 | -0.173251597 | 0.0509252 | -0.109580576 | 0.219857 |
| ZNF415     | -0.443139937 | 0.0101032 | -0.111610851 | 0.5098727 | -0.3113824   | 0.068861 |
| AUNIP      | -0.517380529 | 0.010127  | -0.547689137 | 0.005982  | -0.382129161 | 0.054684 |
| C1orf159   | 0.445603539  | 0.0101544 | 0.232978377  | 0.1750001 | 0.271322513  | 0.115506 |
| HINT3      | -0.23622471  | 0.0101692 | -0.062281817 | 0.4906484 | 0.061446257  | 0.496072 |
| PTX3       | 1.637801543  | 0.0101596 | 1.281191005  | 0.0444005 | 1.439912119  | 0.023847 |
| PUS7L      | -0.33624083  | 0.0101687 | -0.250648084 | 0.0546532 | -0.185051402 | 0.156746 |
| ZNF786     | -0.427774935 | 0.0101453 | -0.370193814 | 0.023175  | -0.519379616 | 0.001735 |
| DYRK4      | -0.337176779 | 0.0101943 | -0.108873081 | 0.3901126 | -0.15927788  | 0.214521 |
| FAM167A    | 0.771071237  | 0.0102001 | 0.083210474  | 0.7864487 | 0.380694034  | 0.211388 |
| TPRN       | -0.462698151 | 0.0102253 | -0.499451062 | 0.0056366 | -0.692793932 | 0.000125 |
| MFSD2A     | 0.76225284   | 0.0102316 | 1.071476335  | 0.000267  | 1.482561736  | 3.64E-07 |
| ICMT       | -0.279700397 | 0.0102531 | -0.168115591 | 0.1211945 | -0.090510961 | 0.404261 |
| NFATC3     | -0.300234385 | 0.0102406 | -0.20125032  | 0.0839088 | -0.418266181 | 0.000342 |
| SEMA7A     | 1.288465183  | 0.0102586 | 1.177670947  | 0.0189337 | 1.869676319  | 0.000191 |
| VN1R2      | -0.956255643 | 0.0102502 | 0.037508201  | 0.9077474 | -0.182236491 | 0.58442  |
| TBC1D2B    | 0.40807464   | 0.0102697 | 0.416715402  | 0.0087119 | 0.260526705  | 0.10145  |
| CLINT1     | 0.311843487  | 0.0103185 | 0.049593442  | 0.6832599 | 0.422777598  | 0.000501 |
| ACPP       | 0.619434874  | 0.0103753 | 0.165662208  | 0.4938914 | 1.084146941  | 6.06E-06 |
| TUBB6      | 0.536822369  | 0.0103727 | 0.601370266  | 0.0040341 | 0.440579854  | 0.035354 |
| ALG1       | -0.34257616  | 0.0103819 | -0.25347417  | 0.0556125 | -0.191676058 | 0.147427 |
| ENGASE     | -0.387613103 | 0.0103919 | -0.696481137 | 4.57E-06  | -0.647597651 | 1.95E-05 |
| ZSCAN16    | -0.392044559 | 0.0104067 | -0.469393724 | 0.0018311 | -0.405056343 | 0.007355 |
| AARS2      | -0.250270671 | 0.0104546 | -0.276623012 | 0.0041381 | -0.386877866 | 7.44E-05 |
| MLF2       | 0.211962693  | 0.010455  | -0.092525736 | 0.2643848 | -0.040708071 | 0.623838 |
| NACC1      | 0.503980598  | 0.0104609 | 0.173542507  | 0.3780479 | 0.183423373  | 0.352078 |
| EPRS       | -0.311014103 | 0.010478  | -0.099377245 | 0.4124507 | 0.138855505  | 0.2519   |
| TAF13      | 0.362793757  | 0.0104918 | 0.087926046  | 0.5357244 | 0.48812602   | 0.000536 |
| SCAI       | -0.54737379  | 0.0105433 | -0.147297839 | 0.4900159 | -0.174948837 | 0.413586 |
| GDPD3      | -0.621164667 | 0.010586  | -0.395396203 | 0.0934976 | -0.18313142  | 0.430222 |
| PTP4A2     | 0.299034995  | 0.0105865 | 0.278045203  | 0.0174259 | 0.480961269  | 3.90E-05 |
| FMNL3      | 0.685035861  | 0.0106136 | 0.586427155  | 0.0285689 | 0.223186828  | 0.406153 |
| ZNF211     | -0.447167757 | 0.0106101 | -0.421865363 | 0.0153295 | -0.515367815 | 0.003106 |
| XRCC2      | -0.431290601 | 0.0106289 | 0.02219905   | 0.8941569 | -0.184545408 | 0.270599 |
| YEATS2     | -0.260055303 | 0.0106901 | -0.146522941 | 0.1471586 | -0.277477855 | 0.006387 |
| EXO5       | -0.428877656 | 0.0106982 | -0.730873082 | 1.33E-05  | -0.460372518 | 0.006395 |

|           |              |           |              |           |              |          |
|-----------|--------------|-----------|--------------|-----------|--------------|----------|
| CRY1      | 0.440338462  | 0.0107475 | 0.213405362  | 0.2163213 | 0.272219461  | 0.114713 |
| IFRD1     | 0.296620094  | 0.0107962 | 0.037508032  | 0.7473422 | 0.198135349  | 0.088328 |
| ANKRD9    | -0.427423205 | 0.0108281 | -0.45042112  | 0.0068749 | -0.09613127  | 0.563859 |
| LSM1      | -0.272614454 | 0.0108449 | -0.137915931 | 0.1892501 | -0.038210046 | 0.716266 |
| MAN2B1    | 0.335518535  | 0.0108789 | 0.118750984  | 0.3672167 | 0.437563975  | 0.000878 |
| PNMA1     | -0.373168852 | 0.0108812 | -0.020256247 | 0.8883431 | -0.331167013 | 0.023067 |
| ATG16L1   | -0.272681814 | 0.0109172 | -0.129104978 | 0.2190292 | -0.373006898 | 0.000458 |
| CXCL17    | 1.665904883  | 0.0109192 | 0.816300581  | 0.2168549 | 3.175089454  | 8.53E-07 |
| DIS3L     | -0.299124578 | 0.0109316 | 0.08510791   | 0.4629742 | -0.09282193  | 0.424727 |
| CHPT1     | -0.533216187 | 0.0109476 | -0.108848984 | 0.6002006 | -0.28397385  | 0.173831 |
| PLGLB1    | -0.455148576 | 0.0109531 | -0.14618206  | 0.3866019 | -0.193659964 | 0.254857 |
| ANXA2     | 0.277122338  | 0.0109741 | 0.211991679  | 0.05164   | 0.55990484   | 2.73E-07 |
| MRPL19    | -0.290456665 | 0.0109677 | -0.088253438 | 0.4350426 | -0.023976595 | 0.832186 |
| TEX30     | -0.392674888 | 0.0111183 | -0.170043769 | 0.2537743 | -0.212797002 | 0.156957 |
| SLC30A4   | 0.575309974  | 0.0111369 | 0.656050364  | 0.0036219 | 1.028691472  | 4.66E-06 |
| GAL       | 1.604347377  | 0.0111636 | 1.709114559  | 0.0062984 | 1.409295291  | 0.026089 |
| SPR       | -0.422069561 | 0.0111871 | -0.197317933 | 0.2275667 | -0.118380863 | 0.46937  |
| KIAA0753  | -0.367939482 | 0.0112028 | -0.175763695 | 0.2206361 | -0.218188681 | 0.129623 |
| VKORC1L1  | -0.321501768 | 0.0112144 | -0.122093979 | 0.3337756 | 0.075028689  | 0.552111 |
| ZNF649    | -0.300689358 | 0.0112132 | -0.194445567 | 0.0968189 | -0.345787179 | 0.003443 |
| TBX15     | 0.563634992  | 0.0112339 | 0.469165067  | 0.0341941 | 0.483212594  | 0.029574 |
| NSUN6     | -0.416723903 | 0.0112544 | 0.091978592  | 0.5648496 | -0.090410189 | 0.57361  |
| CEP170B   | 0.430903486  | 0.0112849 | 0.161504305  | 0.3424736 | 0.266756701  | 0.11662  |
| ABCA10    | 1.451254552  | 0.011318  | 1.281781268  | 0.0258594 | 1.615857312  | 0.004778 |
| DNAJB14   | -0.226649833 | 0.0113238 | -0.008723995 | 0.9217995 | -0.099045593 | 0.266113 |
| PHPT1     | 0.241537597  | 0.0113137 | -0.118280269 | 0.2164517 | -0.018620791 | 0.84568  |
| AMPD3     | 0.724862749  | 0.011332  | 0.430582244  | 0.1326523 | 0.29298958   | 0.306246 |
| AP3D1     | 0.292548523  | 0.01135   | 0.117560275  | 0.3080075 | 0.142554545  | 0.216554 |
| ATP5EP2   | -3.785649668 | 0.0113465 | -1.497378697 | 0.2796714 | -1.145754556 | 0.406801 |
| CALM1     | -0.269304195 | 0.0114019 | -0.231341399 | 0.02956   | -0.061117543 | 0.565363 |
| CAMKK1    | -0.501184411 | 0.011429  | -0.703543159 | 0.0003684 | -0.752307315 | 0.000175 |
| METTL14   | -0.34318499  | 0.0114224 | -0.184262824 | 0.171769  | -0.270228897 | 0.045579 |
| ZNF677    | -0.349545235 | 0.0114287 | -0.251062767 | 0.0684882 | -0.358173543 | 0.009674 |
| VASP      | 0.271222188  | 0.0114397 | -0.004604786 | 0.9657973 | 0.169924122  | 0.112826 |
| PCYT2     | -0.312409312 | 0.0114591 | -0.396197306 | 0.0012637 | -0.182313845 | 0.137406 |
| CC2D2A    | -0.383903345 | 0.0115211 | -0.073610708 | 0.6233221 | -0.312901121 | 0.038545 |
| CDH13     | 1.036557753  | 0.0115249 | 0.676716183  | 0.0993707 | 0.398082651  | 0.333881 |
| CHML      | -0.263465792 | 0.0115079 | -0.257909113 | 0.0128516 | -0.188467189 | 0.069231 |
| GOLGA2P5  | -0.565026427 | 0.0115266 | -0.503152876 | 0.022732  | -0.963549161 | 1.99E-05 |
| P11-22B23 | -0.496393272 | 0.0115242 | -0.560574045 | 0.0039627 | -0.585956856 | 0.00278  |
| RSAD1     | -0.379915334 | 0.011511  | -0.702936798 | 2.68E-06  | -0.803767673 | 9.76E-08 |
| FAM58A    | -1.700315286 | 0.0115726 | -1.674390685 | 0.0116917 | -0.689463408 | 0.295408 |
| INHBA     | 1.008792844  | 0.0115943 | 1.252193941  | 0.0017042 | 1.360227681  | 0.000653 |
| TOP2B     | -0.256929263 | 0.0115894 | 0.12952706   | 0.2019493 | 0.128414821  | 0.206355 |
| CHTF8     | -0.299487477 | 0.0116384 | -0.288348536 | 0.0151948 | -0.158716854 | 0.18143  |
| SCO1      | -0.274657903 | 0.0116357 | -0.151753058 | 0.1603727 | -0.034333505 | 0.751318 |
| TBC1D31   | -0.337330198 | 0.0116363 | -0.047464466 | 0.7143022 | -0.216945327 | 0.097125 |

|            |              |           |              |           |              |          |
|------------|--------------|-----------|--------------|-----------|--------------|----------|
| ZNF75D     | -0.344313187 | 0.0116685 | -0.409951989 | 0.0023393 | -0.148543621 | 0.268069 |
| ZNF449     | -0.359791381 | 0.0116912 | 0.1166913    | 0.3963015 | -0.002992347 | 0.982767 |
| AC068279.3 | -1.318736025 | 0.0117341 | -0.553301669 | 0.2606916 | -0.959447047 | 0.057564 |
| SRRT       | 0.499615497  | 0.011732  | 0.296509576  | 0.135318  | 0.266170341  | 0.180828 |
| ZNF239     | -0.447448859 | 0.0117249 | -0.298246653 | 0.0862255 | -0.380375118 | 0.030221 |
| METTL9     | -0.407125551 | 0.0117555 | -0.214762369 | 0.1826155 | -0.216164981 | 0.180021 |
| EXOSC3     | -0.349112501 | 0.0117638 | -0.14076045  | 0.3026049 | -0.189395683 | 0.16804  |
| A2M        | 0.627981273  | 0.0117788 | 0.717332138  | 0.0040093 | 0.183755463  | 0.461187 |
| REPIN1     | 0.366998758  | 0.0118037 | 0.083403079  | 0.5673483 | 0.351387517  | 0.015777 |
| F2RL2      | 0.560835415  | 0.0118773 | 0.269986566  | 0.2262308 | 0.37242058   | 0.094955 |
| DSP        | -0.326361399 | 0.0119121 | -0.174622074 | 0.17818   | 0.015502811  | 0.904845 |
| LARS2      | -0.306929096 | 0.0119189 | -0.20422595  | 0.0916822 | -0.280434972 | 0.021271 |
| THAP5      | -0.345369923 | 0.0119129 | -0.026081053 | 0.8477797 | -0.155107046 | 0.255131 |
| LRRC27     | -0.585389961 | 0.0119492 | -0.294929828 | 0.1881749 | -0.512033981 | 0.024268 |
| 1-Mar      | -0.484710101 | 0.0119523 | -0.211325962 | 0.26318   | -0.388240597 | 0.041822 |
| LIPT2      | -0.584097473 | 0.0119839 | -0.082861148 | 0.7018928 | -0.392768594 | 0.079409 |
| YLPM1      | -0.343668525 | 0.0119803 | -0.181265383 | 0.1833873 | -0.269301469 | 0.04862  |
| DNAH14     | -0.280999141 | 0.0120158 | 0.096924485  | 0.3752343 | -0.095948396 | 0.386355 |
| SEC11C     | -0.329171616 | 0.0120166 | -0.193625913 | 0.135573  | 0.099170401  | 0.442429 |
| MICU2      | -0.206850146 | 0.0120305 | -0.099958245 | 0.2174155 | 0.036250112  | 0.653809 |
| SCNM1      | -0.282568512 | 0.0120246 | -0.277164817 | 0.0124078 | -0.076825658 | 0.486518 |
| RNF222     | 0.892095146  | 0.0120521 | 0.901317818  | 0.0095009 | 0.302103476  | 0.415694 |
| DDX39B     | 0.215266133  | 0.0120792 | 0.207284872  | 0.0155172 | 0.221194848  | 0.009848 |
| H6PD       | 0.262912417  | 0.0120802 | 0.049498638  | 0.6362702 | -0.038926103 | 0.710555 |
| PLK4       | -0.387763965 | 0.0120866 | -0.152263713 | 0.3218622 | -0.073085851 | 0.634622 |
| TPRKB      | -0.290180635 | 0.0120847 | -0.054104713 | 0.6302375 | -0.078992511 | 0.484983 |
| CSTF3      | -0.192059223 | 0.0121262 | -0.053497495 | 0.4735773 | -0.078195786 | 0.299436 |
| DEPDC1     | -0.532503325 | 0.0121187 | -0.226302442 | 0.2830406 | -0.351587664 | 0.096193 |
| HSPB11     | -0.274533119 | 0.012132  | -0.069565535 | 0.5134614 | -0.133204818 | 0.214921 |
| ZNF234     | -0.389214869 | 0.0121336 | -0.161967919 | 0.2922232 | -0.469612486 | 0.002479 |
| COX6B1     | 0.260305306  | 0.01215   | -0.063064302 | 0.5436881 | 0.13816113   | 0.182935 |
| NCBP2      | -0.30758963  | 0.0121544 | -0.02271602  | 0.8526237 | -0.030075596 | 0.805864 |
| GRTP1      | -0.527021444 | 0.012165  | -0.513404848 | 0.0134986 | -0.348778823 | 0.091916 |
| ADPGK      | 0.304735793  | 0.0122077 | 0.082893502  | 0.4948539 | 0.153805368  | 0.205809 |
| TAF5       | -0.342093492 | 0.0122264 | -0.105136369 | 0.42724   | -0.349950925 | 0.009681 |
| NIF3L1     | -0.286408905 | 0.0122459 | -0.057481644 | 0.604655  | -0.070087073 | 0.532092 |
| NDC80      | -0.382843931 | 0.0122698 | 0.140754654  | 0.3479431 | -0.085036095 | 0.573216 |
| ARHGEF11   | 0.32292036   | 0.0123062 | -0.070667434 | 0.5839207 | 0.020597351  | 0.873265 |
| METTL18    | -0.348215004 | 0.012312  | -0.093666729 | 0.4800025 | 0.004382596  | 0.973687 |
| TRIM32     | -0.252005029 | 0.0123248 | -0.389769957 | 9.30E-05  | -0.497542543 | 9.18E-07 |
| EID1       | -0.334916708 | 0.012356  | 0.079486832  | 0.55176   | -0.159528144 | 0.233014 |
| ITGB6      | 0.709189584  | 0.0123448 | 0.225264448  | 0.4269202 | 1.046068934  | 0.000222 |
| SCNN1G     | -1.588503943 | 0.0123624 | -1.439990571 | 0.0214241 | -0.922469795 | 0.135811 |
| ZNF44      | -0.335320589 | 0.0123584 | -0.42598919  | 0.0013948 | -0.361198664 | 0.006817 |
| HDDC3      | -0.577822431 | 0.0123728 | -0.393970748 | 0.0821926 | -0.419862169 | 0.065632 |
| MTF2       | -0.279795767 | 0.0123806 | -0.306446465 | 0.0059926 | -0.33299518  | 0.002912 |
| SMIM22     | 0.456770459  | 0.0123879 | -0.127722192 | 0.4881281 | 0.610711971  | 0.000766 |

|            |              |           |              |           |              |          |
|------------|--------------|-----------|--------------|-----------|--------------|----------|
| TLDC1      | 0.251077316  | 0.0124033 | -0.056080122 | 0.5776882 | 0.087129976  | 0.387463 |
| HSPA4      | -0.243908857 | 0.0124525 | -0.026489674 | 0.7850931 | -0.04394901  | 0.651919 |
| TP53INP1   | -0.288087901 | 0.0124575 | -0.174288088 | 0.127053  | -0.367222804 | 0.001417 |
| EFHD2      | 0.516103759  | 0.0125358 | 0.214092458  | 0.3005996 | 0.759271959  | 0.000233 |
| GK         | 0.753382104  | 0.0125306 | 1.013075823  | 0.0007456 | 0.473375642  | 0.116247 |
| PIWIL4     | -0.630266417 | 0.0125449 | -0.827114897 | 0.0009888 | -0.147966419 | 0.548286 |
| ZNF808     | -0.431698038 | 0.0125452 | -0.693728523 | 5.74E-05  | -0.470154295 | 0.006362 |
| RUSC1      | 0.268772497  | 0.0125561 | -0.109502021 | 0.3128567 | 0.076515046  | 0.478991 |
| TYSND1     | -0.478493603 | 0.0125619 | -0.40365637  | 0.0324047 | -0.45493923  | 0.016839 |
| DTWD1      | -0.287748707 | 0.012605  | -0.108025285 | 0.340206  | -0.37179337  | 0.001288 |
| UBR2       | -0.171658971 | 0.0126272 | -0.202201242 | 0.003059  | -0.185663336 | 0.006677 |
| SLC22A23   | 0.51665456   | 0.0126748 | 0.295130041  | 0.1544914 | 0.731470256  | 0.000405 |
| FAM73A     | -0.288418893 | 0.0127021 | -0.155718605 | 0.1741145 | -0.09909308  | 0.387985 |
| STOX1      | -0.476611339 | 0.0126988 | -0.347394233 | 0.0626138 | -0.148110682 | 0.423754 |
| KLHL8      | -0.250376282 | 0.0127124 | -0.10657462  | 0.2796657 | -0.112844856 | 0.25403  |
| MLXIPL     | -0.917817916 | 0.0127441 | -0.341600215 | 0.3417391 | -0.73292888  | 0.046437 |
| SSPN       | 0.856722381  | 0.0127398 | 0.847630807  | 0.0132116 | 0.672489788  | 0.049841 |
| ZNF701     | -0.306106036 | 0.0127565 | -0.39252498  | 0.0013142 | -0.369374704 | 0.002687 |
| TMEM170B   | -0.354776617 | 0.012793  | -0.341109109 | 0.0157864 | -0.231662291 | 0.101015 |
| CLDN10     | -2.453889662 | 0.0128007 | -1.031525933 | 0.2696423 | 0.032409199  | 0.971984 |
| NAT1       | -0.442375978 | 0.0128219 | -0.587171008 | 0.000918  | -0.476434683 | 0.006595 |
| RFC5       | -0.351712366 | 0.0128352 | -0.28920951  | 0.0389777 | -0.048909078 | 0.727066 |
| RCSD1      | -1.045119063 | 0.0128624 | -0.132577468 | 0.7307601 | 0.201045965  | 0.601935 |
| LEKR1      | 1.349908251  | 0.012878  | 1.2638115    | 0.0193343 | 1.033370911  | 0.055493 |
| KIAA0368   | 0.380594784  | 0.0129382 | 0.422976084  | 0.0057172 | 0.5560396    | 0.00028  |
| MIER3      | -0.291855262 | 0.0129329 | -0.175934616 | 0.1326071 | -0.322824367 | 0.005947 |
| TCHP       | -0.403820986 | 0.0129387 | -0.077101744 | 0.6289861 | -0.250590882 | 0.121325 |
| TB-50L17.1 | 1.20361125   | 0.0129468 | 0.844643909  | 0.0832795 | 0.876004865  | 0.0736   |
| ANKRD30B   | 0.598506728  | 0.0129854 | 0.880828502  | 0.0001854 | 0.369225251  | 0.126397 |
| DDX27      | 0.799752283  | 0.0130282 | 0.693258304  | 0.0303641 | 0.499690147  | 0.121624 |
| DGKE       | -0.500944656 | 0.0130243 | -0.070128746 | 0.7214593 | -0.139017653 | 0.480883 |
| FAM98A     | 0.285547246  | 0.0130078 | 0.020644224  | 0.8576268 | 0.173263162  | 0.131837 |
| LSM12      | 0.263694706  | 0.0129899 | -0.023549311 | 0.8245973 | 0.162511334  | 0.125622 |
| MSH6       | -0.315851038 | 0.0130398 | -0.182536179 | 0.1504881 | -0.221079292 | 0.081722 |
| NCK1       | 0.385554264  | 0.0130356 | 0.372834471  | 0.0161991 | 0.572572924  | 0.000215 |
| PHF5A      | -0.266568539 | 0.0130311 | -0.072107547 | 0.493729  | -0.067854711 | 0.52079  |
| TRIB2      | 0.638508312  | 0.0130145 | 0.541555434  | 0.0351212 | 0.550648493  | 0.032192 |
| RWDD4      | -0.304612142 | 0.013058  | 0.049727033  | 0.6800093 | -0.058176013 | 0.630986 |
| FAM46A     | -0.452709305 | 0.0130871 | -0.829418952 | 5.49E-06  | -1.013234752 | 2.87E-08 |
| TOMM7      | -0.280434635 | 0.0130871 | -0.188847026 | 0.0915071 | -0.118694822 | 0.289226 |
| C9orf114   | -0.378372297 | 0.0131115 | -0.333390926 | 0.0273686 | -0.331396908 | 0.029554 |
| HIST4H4    | -0.413355253 | 0.0131529 | -0.301646842 | 0.0690847 | -0.189826101 | 0.25244  |
| IFNAR1     | 0.224988298  | 0.0131728 | 0.104468055  | 0.2489889 | 0.457414587  | 4.01E-07 |
| CHD4       | 0.258874575  | 0.0132094 | 0.159357494  | 0.1269379 | 0.164059276  | 0.116216 |
| 11-1023L1  | -0.795447815 | 0.0132247 | -0.087577357 | 0.7755374 | -0.598236047 | 0.057615 |
| TIPARP     | 0.54258038   | 0.0132329 | 0.299091223  | 0.1721386 | 0.633464667  | 0.003801 |
| CMAS       | -0.27692471  | 0.0133149 | 0.001172202  | 0.9915544 | -0.00792129  | 0.942945 |

|            |              |           |              |           |              |          |
|------------|--------------|-----------|--------------|-----------|--------------|----------|
| CSNK2B     | 0.271379609  | 0.013287  | 0.225682072  | 0.0390294 | 0.185531355  | 0.090271 |
| P11-274B21 | 0.47661307   | 0.0133036 | -0.063633607 | 0.7438317 | -0.109947126 | 0.574706 |
| TMEM206    | -0.696483114 | 0.0132981 | -0.387469322 | 0.1604482 | -0.67502762  | 0.015745 |
| VSIG1      | 0.658820967  | 0.0133101 | 0.093911689  | 0.7242213 | 0.99545648   | 0.000184 |
| PPP1R7     | -0.255264777 | 0.0133694 | -0.285926743 | 0.0052751 | -0.194478764 | 0.057524 |
| ZNF488     | -0.784671345 | 0.0133944 | -1.075791364 | 0.0007142 | -1.817091773 | 4.43E-08 |
| CDK1       | -0.389461267 | 0.0134818 | -0.172636388 | 0.2715796 | -0.225527098 | 0.151294 |
| ABHD16A    | 0.26133628   | 0.013491  | 0.005180005  | 0.9609953 | 0.185318038  | 0.079557 |
| TMEM248    | 0.236745455  | 0.0135048 | 0.148082525  | 0.1214915 | 0.299610553  | 0.001737 |
| ADGB       | 1.230595255  | 0.0135628 | 0.954956842  | 0.0487142 | 0.484033538  | 0.323033 |
| PYURF      | -0.254983754 | 0.0136545 | -0.013838266 | 0.8911663 | -0.127185951 | 0.212614 |
| OSBPL1A    | -0.252262823 | 0.0136683 | -0.113932323 | 0.2592638 | 0.051563777  | 0.609466 |
| LEPREL2    | 0.80672223   | 0.013679  | -0.014770151 | 0.9641717 | -0.343876773 | 0.300231 |
| NRDE2      | -0.381816648 | 0.0137051 | -0.325354898 | 0.0348587 | -0.31851793  | 0.039791 |
| ACTR3B     | -0.53107191  | 0.013752  | 0.208422667  | 0.3242436 | 0.343909647  | 0.104959 |
| EMD        | 0.333236809  | 0.0137328 | 0.275186786  | 0.0397112 | 0.395980293  | 0.003011 |
| ISY1       | -0.424354648 | 0.0137225 | -0.227306973 | 0.1819015 | -0.287891889 | 0.091656 |
| LYPD2      | 1.1271554    | 0.0137428 | 0.09643989   | 0.834134  | 1.527731365  | 0.00081  |
| MOBP       | 0.957918416  | 0.0137545 | 0.811925751  | 0.0286727 | 0.536367267  | 0.15923  |
| PDLIM7     | 0.560569556  | 0.0137581 | 0.348308691  | 0.1257825 | 0.141940474  | 0.533383 |
| TMEM134    | 0.520248236  | 0.0137634 | -0.157401933 | 0.4584215 | 0.262501485  | 0.216196 |
| SC5D       | 0.278753617  | 0.0137968 | 0.171247447  | 0.1296693 | 0.316632853  | 0.005075 |
| FST        | 0.723177577  | 0.0138067 | 0.368875917  | 0.2092576 | -0.06968266  | 0.812908 |
| MKNK1      | 0.320508735  | 0.0138416 | 0.103709228  | 0.4228901 | 0.239920467  | 0.063276 |
| ADAM2      | -1.006210504 | 0.0138494 | -0.513750192 | 0.1723691 | -0.690468424 | 0.075834 |
| AP3M2      | -0.371497755 | 0.0138583 | -0.309641306 | 0.0390516 | -0.435863156 | 0.003827 |
| GPR116     | 0.888294698  | 0.0138733 | 0.478453546  | 0.1830097 | 1.027463599  | 0.004206 |
| GPR135     | -1.028365174 | 0.0139855 | -0.288653889 | 0.4632758 | -0.220092543 | 0.57503  |
| R3HDM4     | 0.324383589  | 0.0139886 | 0.022415371  | 0.8652901 | 0.364217896  | 0.005627 |
| ALCAM      | 0.469404429  | 0.01408   | 0.174940203  | 0.3601182 | 0.933478101  | 1.01E-06 |
| U2AF2      | 0.217527475  | 0.0140926 | -0.044847219 | 0.61227   | -0.008980313 | 0.919214 |
| NCK2       | 0.31548618   | 0.0141148 | 0.45523815   | 0.0003663 | 0.5220347    | 4.45E-05 |
| MSL3P1     | -0.523361608 | 0.0141251 | -0.606047641 | 0.0038783 | -0.536744572 | 0.010975 |
| NCAPD3     | -0.411189165 | 0.0141442 | -0.193887123 | 0.2450026 | -0.272076006 | 0.102728 |
| ACSF3      | -0.345387525 | 0.0141805 | -0.213789411 | 0.1264511 | -0.410688529 | 0.003659 |
| STAG3L5P   | -0.416741913 | 0.0141829 | -0.17545495  | 0.2913439 | -0.293115716 | 0.081472 |
| ZNF595     | -0.374567229 | 0.0141764 | 0.00254518   | 0.9865193 | -0.276095217 | 0.069061 |
| OTUD5      | 0.308828656  | 0.0141925 | 0.172045836  | 0.1726348 | 0.229580397  | 0.068739 |
| RAB11FIP2  | -0.480901695 | 0.0142086 | -0.522141735 | 0.0075845 | -0.246657067 | 0.206913 |
| ALKBH8     | -0.332660183 | 0.0142384 | -0.030397138 | 0.8172514 | -0.163665701 | 0.218828 |
| AC010970.2 | -1.245404445 | 0.0143085 | -0.353087929 | 0.4863956 | 0.050264194  | 0.92104  |
| IST1       | 0.186338215  | 0.014325  | 0.067416938  | 0.3755391 | 0.216177019  | 0.004454 |
| PTHLH      | 1.731925406  | 0.014318  | 1.633415412  | 0.020721  | 2.740834224  | 9.59E-05 |
| DEPDC7     | -1.038381102 | 0.0143573 | -0.814652482 | 0.0517923 | -2.505947264 | 2.11E-08 |
| C12orf45   | -1.001049942 | 0.0143667 | -0.687691819 | 0.0865458 | -0.670224478 | 0.094934 |
| GTPBP4     | 0.362241977  | 0.0143885 | 0.292736715  | 0.0477619 | 0.423852228  | 0.004154 |
| YRDC       | 0.409019616  | 0.0144129 | 0.081383124  | 0.6271983 | 0.426506914  | 0.010416 |



|          |              |           |              |           |              |          |
|----------|--------------|-----------|--------------|-----------|--------------|----------|
| THYN1    | -0.287777708 | 0.0144535 | -0.109871104 | 0.3401812 | -0.206037026 | 0.076595 |
| COL5A3   | 1.322265027  | 0.014465  | 0.943634393  | 0.0812159 | 0.404537734  | 0.457923 |
| MRPS7    | -0.227880835 | 0.0144727 | -0.01267259  | 0.8898287 | -0.047506419 | 0.605654 |
| PPM1D    | -0.227512347 | 0.0144848 | -0.266819879 | 0.0037872 | -0.239807536 | 0.009494 |
| TXNIP    | -0.500347792 | 0.0145502 | -0.689781507 | 0.0007568 | -0.686435636 | 0.000804 |
| LRRC8D   | -0.347644238 | 0.014575  | 0.157084593  | 0.2607773 | -0.215721065 | 0.126895 |
| PDE4A    | 0.811784229  | 0.0145874 | 0.199773046  | 0.5569746 | 0.251023251  | 0.452772 |
| CLPX     | -0.276567357 | 0.0146119 | 0.165541874  | 0.1410059 | 0.002405971  | 0.982954 |
| ELMOD2   | -0.284037902 | 0.0146535 | -0.069806775 | 0.5454015 | -0.074970931 | 0.517325 |
| IER2     | 0.518636741  | 0.0147118 | 0.208419652  | 0.3271824 | 0.179732395  | 0.398627 |
| ZNF106   | -0.279918618 | 0.0147601 | -0.083664796 | 0.4647235 | -0.22582631  | 0.048861 |
| FBXW11   | 0.236441436  | 0.0147722 | 0.090574556  | 0.349228  | 0.218723173  | 0.023686 |
| SRPR     | 0.262492629  | 0.0147779 | -0.184081807 | 0.0884567 | 0.111502933  | 0.300103 |
| C1orf27  | -0.233956757 | 0.014798  | -0.064921825 | 0.4920593 | -0.044920242 | 0.635597 |
| MFF      | -0.224139171 | 0.0147993 | -0.013951061 | 0.8780671 | -0.117754614 | 0.197485 |
| SLC16A13 | 0.487663995  | 0.0148274 | 0.216902136  | 0.280494  | 0.07980332   | 0.697735 |
| USF1     | -0.249575988 | 0.0148251 | -0.151322281 | 0.1347641 | -0.189288226 | 0.063463 |
| RNF11    | 0.259146546  | 0.0148618 | 0.118877371  | 0.2626327 | 0.374496161  | 0.000414 |
| TUBGCP3  | -0.395728917 | 0.0148602 | -0.425783546 | 0.0084091 | -0.534191993 | 0.000966 |
| CPSF2    | -0.250683459 | 0.0149795 | 0.083051547  | 0.4176668 | 0.016383479  | 0.873141 |
| PLA2G10  | -2.993158146 | 0.015003  | -2.610354073 | 0.0291091 | 0.481169843  | 0.671737 |
| RTN4     | 0.203851959  | 0.01504   | 0.21744869   | 0.0093365 | 0.223495724  | 0.007581 |
| GLE1     | -0.268598498 | 0.0150657 | -0.112524812 | 0.3015426 | -0.11868965  | 0.277324 |
| MT-ATP6  | 0.643446938  | 0.0150513 | -0.18523895  | 0.4841809 | -0.169303478 | 0.522586 |
| MZT1     | -0.32374717  | 0.015067  | -0.266487092 | 0.0421893 | -0.229925193 | 0.080505 |
| CDKN2AIP | -0.485653371 | 0.0150886 | -0.636764448 | 0.0014392 | -0.734070425 | 0.00025  |
| PEX6     | -0.306398139 | 0.015128  | -0.273762405 | 0.0279959 | -0.274864567 | 0.028013 |
| TIMM21   | -0.322089359 | 0.0152775 | -0.313614593 | 0.0168216 | -0.262848494 | 0.045271 |
| CDC6     | -0.483193811 | 0.0152943 | -0.273029217 | 0.1690248 | -0.23446344  | 0.237731 |
| KIAA0355 | 0.348682214  | 0.0152927 | 0.317601647  | 0.0268798 | 0.309623441  | 0.031194 |
| CYR61    | 0.742392119  | 0.0153146 | 0.016211649  | 0.958041  | 0.320319906  | 0.296927 |
| GPATCH2  | -0.24416394  | 0.0153482 | -0.123599686 | 0.2146045 | -0.081819541 | 0.412944 |
| TMEM41A  | -0.246693768 | 0.0153496 | -0.208157176 | 0.0393961 | -0.383046509 | 0.000163 |
| OSBPL11  | -0.179760167 | 0.0153668 | -0.176126983 | 0.0157244 | -0.321826506 | 1.44E-05 |
| URI1     | -0.343547648 | 0.015407  | -0.017848302 | 0.8995702 | -0.027446088 | 0.846142 |
| COQ7     | 0.346273028  | 0.0154419 | 0.333066138  | 0.0188905 | 0.208458593  | 0.142533 |
| ATL3     | -0.187672301 | 0.0154869 | -0.149700348 | 0.0517007 | -0.048227495 | 0.530721 |
| ZBTB22   | 0.249809576  | 0.015501  | 0.002146395  | 0.9834181 | 0.014983254  | 0.885252 |
| TUBA3FP  | 0.662667166  | 0.0155329 | 0.549259925  | 0.0416492 | 0.671286581  | 0.013234 |
| C19orf55 | 0.50694662   | 0.0155622 | 0.026906758  | 0.898298  | 0.039547107  | 0.852756 |
| GCNT1    | -0.644608439 | 0.0155932 | -0.682874679 | 0.0104139 | -0.253049196 | 0.342251 |
| GMEB2    | 0.315684673  | 0.0155999 | 0.15770391   | 0.2256634 | 0.355761864  | 0.006101 |
| GPRC5C   | 0.403932986  | 0.0155993 | -0.161549764 | 0.3345331 | 0.285378183  | 0.087487 |
| KLHDC2   | -0.342274396 | 0.0155838 | -0.223352204 | 0.1133709 | -0.140075697 | 0.320621 |
| PCNT     | -0.362176012 | 0.0155884 | -0.233709746 | 0.1182001 | -0.136348297 | 0.362081 |
| APH1A    | 0.243915695  | 0.0156718 | -0.008387471 | 0.9337661 | 0.256371243  | 0.010922 |
| C4orf27  | -0.319379139 | 0.0156394 | 0.167685671  | 0.1861529 | -0.282095272 | 0.03075  |

|          |              |           |              |           |              |          |
|----------|--------------|-----------|--------------|-----------|--------------|----------|
| MFSD9    | -0.411303502 | 0.0156694 | -0.70062917  | 3.81E-05  | -0.376637742 | 0.026552 |
| NFYB     | -0.300554242 | 0.0156747 | 0.006192107  | 0.9597856 | -0.270335001 | 0.028831 |
| PREPL    | -0.283530052 | 0.0156538 | -0.15477992  | 0.1851855 | -0.349728192 | 0.002826 |
| TRPC1    | 0.679225349  | 0.0156724 | 0.519244865  | 0.0625232 | 0.249079637  | 0.378433 |
| TRUB1    | -0.293316677 | 0.0156322 | 0.120599237  | 0.3153952 | -0.012634163 | 0.916496 |
| FBXO48   | 0.521030376  | 0.0157158 | 0.37798436   | 0.0776208 | 0.604246135  | 0.004416 |
| SSBP1    | -0.200877744 | 0.015711  | 0.071858157  | 0.3794072 | 0.171609222  | 0.036047 |
| NSL1     | -0.374556245 | 0.0157513 | 0.214823909  | 0.1603659 | -0.090111142 | 0.558053 |
| KCNJ13   | -0.847873823 | 0.0159577 | -0.050406789 | 0.8804351 | -0.689096726 | 0.043606 |
| MAP4K3   | -0.233297331 | 0.0159643 | 0.038316346  | 0.6903323 | -0.118301489 | 0.220692 |
| UBB      | 0.183695456  | 0.0159724 | 0.066318644  | 0.3840644 | 0.322493321  | 2.28E-05 |
| GUSBP1   | -0.42704092  | 0.016018  | -0.27813059  | 0.1102853 | -0.41679519  | 0.017798 |
| C8orf44  | -0.841571559 | 0.0160322 | 0.396299728  | 0.2239135 | 0.141396155  | 0.673102 |
| HNRNPU   | 0.179885974  | 0.0160356 | 0.117597771  | 0.1151866 | 0.111002695  | 0.137207 |
| VANGL2   | 0.390429848  | 0.0160449 | -0.244245224 | 0.1369322 | -0.081592575 | 0.618019 |
| PPM1N    | -0.769700964 | 0.0160561 | -0.085054771 | 0.776972  | -0.300351691 | 0.326677 |
| DHX32    | -0.26087644  | 0.0160836 | -0.20921183  | 0.0515513 | -0.033127142 | 0.757307 |
| DLGAP5   | -0.468956528 | 0.0161015 | 0.050466586  | 0.7947275 | -0.190862933 | 0.326024 |
| ZNF302   | -0.345129765 | 0.0161697 | -0.186496082 | 0.1905242 | -0.510920583 | 0.000374 |
| ZNF354A  | -0.371438746 | 0.0161695 | -0.277782609 | 0.0680289 | -0.362685779 | 0.017943 |
| MPEG1    | -0.862646223 | 0.0161781 | -0.73331821  | 0.0326216 | -1.133172048 | 0.001923 |
| BTN2A2   | 0.50549212   | 0.0162039 | 0.505436711  | 0.015448  | 0.578316365  | 0.005713 |
| PHLPP1   | -0.481467469 | 0.0162601 | -0.047013867 | 0.814356  | -0.370385728 | 0.064291 |
| SHC2     | 0.443371955  | 0.0163056 | -0.131994773 | 0.475746  | 0.182130366  | 0.323887 |
| DDX19B   | 0.280748481  | 0.016327  | 0.190864919  | 0.0998419 | 0.34485148   | 0.00291  |
| HIST1H4C | -0.426962972 | 0.0163369 | 0.015895874  | 0.9286158 | -0.134235934 | 0.449621 |
| LLGL1    | 0.407230677  | 0.0164262 | 0.097434682  | 0.5661559 | -0.053847595 | 0.75184  |
| CLUAP1   | -0.389307031 | 0.0164855 | -0.312768483 | 0.0502826 | -0.291885766 | 0.069518 |
| RHPN2    | 0.455429538  | 0.0164974 | -0.089577674 | 0.6376489 | 0.411331156  | 0.030286 |
| C1orf86  | 0.58125243   | 0.016509  | 0.144933139  | 0.550067  | 0.451964545  | 0.062834 |
| ARPC4    | 0.265186616  | 0.0165234 | -0.070669672 | 0.5238039 | 0.15661543   | 0.156921 |
| MBNL1    | 0.236660372  | 0.0165535 | 0.062504265  | 0.5263074 | 0.212217342  | 0.031392 |
| FIZ1     | 0.431901666  | 0.0165723 | 0.164423358  | 0.3621051 | 0.149098452  | 0.409816 |
| CAMLG    | -0.324507348 | 0.0166136 | -0.221335362 | 0.0991861 | -0.324100168 | 0.016533 |
| AKR1C2   | -0.801102798 | 0.0166438 | -0.256817973 | 0.4388841 | 0.258335555  | 0.434321 |
| NUDT7    | -0.860052535 | 0.0166616 | 0.145075614  | 0.6561602 | 0.245608607  | 0.450203 |
| SEC61G   | -0.278204134 | 0.0167435 | -0.011701318 | 0.9189437 | 0.159928303  | 0.163805 |
| URGCP    | -0.326730197 | 0.0167657 | -0.323388191 | 0.0177119 | -0.448211459 | 0.001042 |
| ZNF438   | 0.397630321  | 0.0167842 | 0.249407691  | 0.1313332 | 0.330544721  | 0.045262 |
| ZFP64    | -0.342685059 | 0.0168539 | -0.341714648 | 0.0160454 | -0.354314619 | 0.013004 |
| 9-Mar    | -0.379749611 | 0.0168654 | -0.341533495 | 0.0297193 | -0.411082582 | 0.009034 |
| MSN      | 0.435111998  | 0.0169063 | 0.43906634   | 0.0158422 | 0.084111118  | 0.644504 |
| PTPRJ    | 0.521622316  | 0.0170139 | 0.46966067   | 0.0309844 | 0.377124101  | 0.084364 |
| POU2F2   | 1.482538918  | 0.0170241 | 0.478390747  | 0.4457354 | 0.796439191  | 0.209435 |
| RPL13P12 | 0.426447471  | 0.0170638 | 0.11060525   | 0.5363277 | 0.325045359  | 0.068972 |
| MOSPD1   | -0.31746804  | 0.0171545 | -0.175151388 | 0.1813167 | -0.377258255 | 0.004345 |
| PLEC     | 0.508261394  | 0.0171534 | 0.623593009  | 0.003443  | 0.67822509   | 0.001466 |

|            |              |           |              |           |              |          |
|------------|--------------|-----------|--------------|-----------|--------------|----------|
| PRPF18     | -0.328195945 | 0.0171367 | -0.148977075 | 0.2715023 | 0.100108739  | 0.457724 |
| RPL9       | -0.377257118 | 0.0171531 | -0.430363617 | 0.0065421 | -0.470881783 | 0.002929 |
| SLC16A10   | -0.897617301 | 0.0171272 | 0.395326356  | 0.2869913 | -0.3952639   | 0.292596 |
| PTEN       | -0.299534801 | 0.0171873 | -0.119181314 | 0.3427496 | -0.035365325 | 0.778215 |
| ZNF395     | -0.384249727 | 0.0171793 | -0.529040419 | 0.0010339 | -0.478883748 | 0.002976 |
| CCDC18     | -0.45294852  | 0.01722   | -0.142364453 | 0.4471759 | -0.357593517 | 0.057942 |
| SF3A2      | 0.2784167    | 0.0172232 | -0.111853829 | 0.3439507 | -0.059302685 | 0.616644 |
| SLC25A40   | -0.280940267 | 0.0173156 | -0.213982441 | 0.0670919 | -0.032403745 | 0.780384 |
| TIAL1      | -0.339375783 | 0.0173517 | -0.340554275 | 0.0167123 | -0.297038578 | 0.037067 |
| SLC25A37   | 0.304896242  | 0.0174192 | 0.394286336  | 0.0019669 | 0.306643701  | 0.016434 |
| CACFD1     | 0.402487813  | 0.0174325 | -0.039184633 | 0.8185159 | 0.111124763  | 0.512403 |
| ASB2       | 1.025726658  | 0.0174674 | 0.007253379  | 0.9867963 | -0.225565238 | 0.617653 |
| CRYGS      | -1.044363807 | 0.0174765 | -0.230651057 | 0.565136  | -0.174081344 | 0.662248 |
| KRCC1      | -0.325020476 | 0.0174765 | -0.054784279 | 0.6839228 | 0.094498962  | 0.481918 |
| PUS7       | -0.426489378 | 0.0174777 | -0.116922013 | 0.5122261 | -0.218469973 | 0.221014 |
| HIST1H2AI  | -0.499139072 | 0.0175941 | -0.160807608 | 0.4434317 | -0.302140135 | 0.150169 |
| SLC9A2     | -0.810628675 | 0.0176299 | -0.763753049 | 0.025032  | -0.080636957 | 0.812675 |
| RABGAP1L   | -0.310286249 | 0.0177754 | -0.309228513 | 0.0180488 | -0.155003443 | 0.235352 |
| STX4       | 0.300060968  | 0.0178206 | 0.223465376  | 0.0754196 | 0.35421972   | 0.004851 |
| GPR3       | 0.837461718  | 0.017846  | 0.352322156  | 0.3281691 | -0.511890405 | 0.198996 |
| ZNRD1      | 0.453413283  | 0.0178555 | 0.035671229  | 0.8525835 | 0.364275573  | 0.056553 |
| NCOA3      | 0.21437339   | 0.0178663 | 0.053995565  | 0.5506092 | 0.163558257  | 0.070254 |
| XBP1       | 0.585705175  | 0.0178788 | 0.27015167   | 0.2747419 | 0.633849458  | 0.010354 |
| SET        | -0.215579259 | 0.0178991 | -0.064791666 | 0.4762053 | -0.073968411 | 0.41624  |
| IFITM3     | 0.329246563  | 0.0179722 | 0.078408181  | 0.5730983 | 0.205769131  | 0.13918  |
| HIPK2      | 0.413808665  | 0.017986  | 0.369046073  | 0.0347389 | 0.344465894  | 0.048815 |
| ACOT9      | 0.279694515  | 0.0180807 | 0.376345754  | 0.0012844 | 0.472037777  | 5.41E-05 |
| CYTH4      | 0.942673125  | 0.0180773 | 1.126461353  | 0.0042644 | 1.129297537  | 0.004479 |
| ARHGEF17   | 0.490809644  | 0.0181128 | 0.065567916  | 0.7521337 | -0.330225714 | 0.113096 |
| SPATA6     | -0.428725866 | 0.0181358 | 0.083660677  | 0.6410933 | -0.222449538 | 0.21542  |
| TRNT1      | -0.252230804 | 0.0181242 | -0.015615814 | 0.8819324 | 0.036921333  | 0.726101 |
| VPS13D     | -1.016789409 | 0.0181419 | -0.514608641 | 0.2311893 | -0.050706125 | 0.905868 |
| GPX2       | 0.491452125  | 0.0182021 | 0.38745072   | 0.062607  | 0.765015843  | 0.000235 |
| AC004980.9 | 1.2055639    | 0.0182341 | 0.454181037  | 0.3837982 | 0.874203937  | 0.089142 |
| FNBP1L     | -0.269751312 | 0.0182362 | -0.21271922  | 0.0623148 | -0.138373477 | 0.225218 |
| MFAP3L     | -1.116068432 | 0.018229  | -0.393665465 | 0.3959401 | -0.990832811 | 0.035088 |
| TBL1X      | 0.288798598  | 0.0183432 | 0.19493433   | 0.1103287 | 0.190396116  | 0.118694 |
| TNFRSF12A  | 0.50850634   | 0.0183333 | 0.334019636  | 0.1209807 | 0.62759383   | 0.003542 |
| UBXN11     | 0.331000903  | 0.0183414 | -0.087281548 | 0.5352599 | 0.108060172  | 0.442461 |
| SLC28A3    | 0.980138619  | 0.0183782 | 1.334307663  | 0.0013037 | 1.019990185  | 0.01413  |
| EEFSEC     | 0.408090644  | 0.0183894 | 0.079988291  | 0.6460846 | 0.181937727  | 0.295646 |
| DAPK3      | 0.322007175  | 0.0184146 | 0.212495669  | 0.1201594 | 0.207035845  | 0.130283 |
| NLGN2      | 0.545788626  | 0.0184153 | 0.070381853  | 0.7625027 | -0.347737942 | 0.138854 |
| GABPA      | -0.183680533 | 0.0184245 | -0.141228609 | 0.0674837 | -0.192864513 | 0.012897 |
| EAF1       | 0.289392597  | 0.0184416 | -0.014990103 | 0.9030216 | 0.217952246  | 0.076043 |
| DEDD       | 0.250465161  | 0.0185302 | 0.026921567  | 0.8004583 | -0.029165682 | 0.784315 |
| UGDH       | -0.239584542 | 0.0185945 | -0.334383128 | 0.0010174 | -0.141530543 | 0.16381  |

|            |              |           |              |           |              |          |
|------------|--------------|-----------|--------------|-----------|--------------|----------|
| ZBTB7B     | -0.38684107  | 0.018612  | -0.568903011 | 0.0005396 | -0.466767584 | 0.004523 |
| APH1B      | 0.503325155  | 0.0186451 | 0.116023319  | 0.5876245 | 0.272459152  | 0.204275 |
| PLCB2      | 0.984769201  | 0.0186468 | 0.400952464  | 0.3394587 | 0.381181329  | 0.364113 |
| RNPS1      | 0.233470464  | 0.0186363 | 0.135378949  | 0.1720413 | 0.252084667  | 0.011007 |
| MRPL43     | -0.19560419  | 0.0186891 | -0.135737908 | 0.0951551 | -0.040796939 | 0.616737 |
| PSMB4      | 0.19620046   | 0.0187214 | 0.046985089  | 0.5728775 | 0.079331178  | 0.341432 |
| ATAD5      | -0.365953291 | 0.0187628 | -0.271595728 | 0.079797  | -0.372640273 | 0.016515 |
| DDX20      | -0.289627966 | 0.018784  | -0.260348673 | 0.0337524 | -0.518403958 | 2.69E-05 |
| RGP1       | 0.221425067  | 0.0187911 | -0.104656773 | 0.2671018 | 0.02154144   | 0.819297 |
| MIF        | 0.419453291  | 0.0188501 | 0.020839899  | 0.907182  | 0.346672929  | 0.052203 |
| TP5J2-PTCI | -0.681027033 | 0.0189284 | -0.943152327 | 0.0011594 | -0.874383285 | 0.002619 |
| MID2       | 0.542151489  | 0.0189206 | 0.124909405  | 0.5907451 | 0.454261332  | 0.048764 |
| PIGO       | 0.347504179  | 0.0189487 | 0.114705603  | 0.4395863 | 0.199574139  | 0.177795 |
| P11-575G13 | -1.268440782 | 0.0189334 | 0.083196224  | 0.8609881 | -0.88852017  | 0.082676 |
| TRAF6      | 0.348220767  | 0.0189492 | 0.236626578  | 0.1104054 | 0.211349298  | 0.154054 |
| ZKSCAN5    | -0.242094218 | 0.0189374 | -0.340217176 | 0.0008873 | -0.387351779 | 0.000172 |
| G2E3       | -0.319697627 | 0.0189753 | -0.169919799 | 0.2091645 | -0.160290908 | 0.236905 |
| ZNF160     | -0.2684227   | 0.018976  | -0.015647173 | 0.8900471 | -0.027726882 | 0.806896 |
| MOCOS      | -0.74158783  | 0.0189973 | -0.533994957 | 0.0894165 | 0.006628838  | 0.983108 |
| RAP2C      | 0.643794994  | 0.0189925 | 0.106028459  | 0.6991531 | 0.655548742  | 0.016786 |
| SERPINA4   | 0.371991955  | 0.0190819 | 0.131265024  | 0.4081653 | 0.500903111  | 0.001577 |
| PLEKHA5    | -0.305914697 | 0.0190988 | -0.231654886 | 0.075324  | -0.243640267 | 0.061577 |
| RAB11B     | 0.445039228  | 0.0191113 | 0.000689453  | 0.9971303 | -0.134842185 | 0.481921 |
| JUN        | 0.598045341  | 0.0191255 | 0.404819471  | 0.1126788 | 1.13448917   | 8.50E-06 |
| P11-777B9. | -2.20142774  | 0.0191949 | -1.018546871 | 0.2776913 | -0.807734885 | 0.389282 |
| TSHZ1      | -0.450470735 | 0.0191943 | -0.165541178 | 0.3831779 | -0.651358668 | 0.000732 |
| TLR2       | 0.527748482  | 0.0192475 | 0.211723626  | 0.3492911 | 0.713562168  | 0.001356 |
| DUSP3      | 0.207641734  | 0.0192618 | 0.036901578  | 0.6771096 | 0.270483066  | 0.002224 |
| EIF5A      | 0.278646952  | 0.0192963 | 0.185502561  | 0.1190666 | 0.327152341  | 0.005969 |
| WIPI1      | 0.293520698  | 0.0192886 | 0.324135628  | 0.0091997 | 0.529834583  | 2.04E-05 |
| LAMTOR1    | 0.19660935   | 0.0193234 | 0.033044144  | 0.6928539 | 0.151822658  | 0.069747 |
| POGK       | -0.189251168 | 0.0193269 | -0.241200038 | 0.0027598 | -0.155348941 | 0.053963 |
| DSCC1      | -0.503920205 | 0.0193642 | -0.217941449 | 0.3029615 | -0.361665516 | 0.090108 |
| DYNLL1     | -0.206022322 | 0.0193728 | -0.135150676 | 0.123278  | -0.124436535 | 0.156306 |
| INCENP     | -0.435852771 | 0.0193737 | -0.006968681 | 0.9700627 | -0.293988449 | 0.114388 |
| FKBP14     | -0.403705592 | 0.0193933 | -0.236694239 | 0.1690879 | -0.158028481 | 0.359501 |
| ZBTB40     | -0.220536573 | 0.0193933 | -0.346107996 | 0.000239  | -0.406067713 | 1.75E-05 |
| SPATA21    | 0.886622687  | 0.0194456 | 0.873321322  | 0.0221922 | 0.315792338  | 0.429283 |
| ZNF860     | -0.596912636 | 0.0194424 | -0.519441186 | 0.0358941 | -0.396686991 | 0.111857 |
| AP005901.1 | 0.708327144  | 0.0195125 | 0.909344912  | 0.0025452 | 0.600191687  | 0.047602 |
| HSDL1      | -0.424641599 | 0.0195254 | -0.568751555 | 0.0016785 | -0.322128454 | 0.075186 |
| TCN1       | 0.688031239  | 0.0195297 | 0.418731359  | 0.1552604 | 1.123677226  | 0.000135 |
| DKN2AIPN   | -0.273095086 | 0.0196519 | -0.107114542 | 0.3428577 | -0.184661549 | 0.107261 |
| HES6       | -0.692924704 | 0.0196771 | -0.802163099 | 0.006894  | -0.305186863 | 0.291783 |
| ZFAND2B    | -0.410595556 | 0.0196796 | -0.358150634 | 0.0402143 | -0.277499082 | 0.112959 |
| SPOP       | -0.242816846 | 0.0197008 | -0.1769698   | 0.087037  | -0.211787443 | 0.040899 |
| TBK1       | 0.240714668  | 0.0197368 | 0.42088618   | 3.93E-05  | 0.52924089   | 2.27E-07 |

|            |              |           |              |           |              |          |
|------------|--------------|-----------|--------------|-----------|--------------|----------|
| TPM3P9     | -0.371912957 | 0.0197782 | -0.38634192  | 0.0143079 | -0.243382713 | 0.123652 |
| MANEAL     | -0.774317313 | 0.0197885 | -0.407478136 | 0.1976329 | -0.127180359 | 0.686116 |
| FOXA3      | 0.523525566  | 0.0198532 | -0.162012186 | 0.4750616 | 0.447839938  | 0.046131 |
| KAT2A      | -0.410498581 | 0.019835  | -0.594481789 | 0.000762  | -0.618862295 | 0.000466 |
| OR7E14P    | -0.649751521 | 0.0198469 | -0.407291848 | 0.1292507 | -0.37360088  | 0.166002 |
| FAM195A    | -1.0196412   | 0.0198745 | 0.292877302  | 0.4863756 | 0.011984578  | 0.977567 |
| DUOXA2     | 1.160630251  | 0.0198869 | 0.827470166  | 0.096953  | 1.337675254  | 0.007255 |
| ETF1P2     | 0.802532541  | 0.0199    | 0.347839065  | 0.3183369 | 0.352618486  | 0.314274 |
| RGN        | -0.933058824 | 0.0199121 | -0.056293413 | 0.8821959 | -1.130592908 | 0.004546 |
| SFR1       | 0.381268306  | 0.0200002 | 0.16184117   | 0.3243049 | 0.694217615  | 1.40E-05 |
| BRF2       | -0.376570452 | 0.0200265 | -0.08468304  | 0.5930183 | -0.629521563 | 0.000106 |
| TOMM70A    | -0.204944439 | 0.0200532 | -0.152608226 | 0.0822631 | -0.178084112 | 0.04279  |
| SGOL2      | -0.330583143 | 0.0201252 | -0.185556679 | 0.1873253 | -0.528415452 | 0.000196 |
| SPRR3      | 1.771428253  | 0.0201278 | 1.124566831  | 0.1413349 | 2.845261343  | 0.000175 |
| HPS3       | -0.384108749 | 0.0201497 | -0.09955861  | 0.5454045 | -0.057577283 | 0.726442 |
| RPP14      | -0.223930487 | 0.0201423 | -0.163740854 | 0.0870272 | -0.310726651 | 0.00123  |
| CNST       | -0.263740204 | 0.0201794 | -0.209829007 | 0.0621238 | -0.263794842 | 0.019604 |
| LPAR3      | 0.830278893  | 0.0201601 | 0.850285927  | 0.0156241 | 0.633287499  | 0.076397 |
| TAP2       | 0.806802636  | 0.0201713 | 0.449174972  | 0.1975621 | 0.447128805  | 0.199236 |
| FPGS       | -0.341920411 | 0.0202207 | -0.01896308  | 0.8955586 | 0.026324138  | 0.854916 |
| SH3BGRL3   | 0.407278123  | 0.0202371 | 0.233025447  | 0.1840528 | 0.367621262  | 0.036061 |
| WDTC1      | 0.293306197  | 0.020326  | -0.077470848 | 0.5413229 | -0.031873047 | 0.802357 |
| PNISR      | -0.256118039 | 0.0204156 | -0.328956056 | 0.0028763 | -0.482520657 | 1.27E-05 |
| SP110      | 0.42859577   | 0.0204814 | 0.036274877  | 0.8442527 | 0.392419756  | 0.032409 |
| ATP10B     | 0.587298534  | 0.0205128 | 0.738863771  | 0.0035174 | 0.29287079   | 0.248111 |
| POLM       | -0.377986175 | 0.0205877 | -0.334999976 | 0.0355701 | -0.345141361 | 0.031781 |
| UNC13A     | 1.484630923  | 0.0206277 | 1.056910448  | 0.1003098 | 1.7331316    | 0.006926 |
| ELMOD3     | -0.360518358 | 0.0206467 | -0.332013036 | 0.0300215 | -0.123992086 | 0.421435 |
| IVNS1ABP   | 0.185864447  | 0.0206479 | 0.06160376   | 0.4415652 | 0.051641502  | 0.519325 |
| HDAC2      | 0.239108085  | 0.0206907 | 0.114404224  | 0.2673562 | 0.15429212   | 0.134824 |
| ULBP3      | -0.522598833 | 0.0207089 | -0.227619389 | 0.3039882 | -0.435040638 | 0.051427 |
| ZNF629     | -0.236038298 | 0.020712  | -0.232686956 | 0.0217832 | -0.321452613 | 0.001605 |
| P11-735A19 | -0.211509358 | 0.0207874 | -0.172232526 | 0.0577347 | -0.182115783 | 0.045419 |
| RWDD3      | -0.304345879 | 0.0208008 | -0.216037112 | 0.0931488 | -0.517597055 | 8.50E-05 |
| PRRC1      | -0.225022479 | 0.0208146 | -0.414317987 | 2.04E-05  | -0.245332117 | 0.011621 |
| TRIM35     | -0.531703742 | 0.0208298 | -0.475808531 | 0.0384076 | -0.629974893 | 0.006187 |
| MXD1       | 0.648524877  | 0.0208972 | 0.60214583   | 0.0318835 | 1.364474803  | 1.12E-06 |
| MED13      | 0.22010471   | 0.0209866 | 0.203106441  | 0.0330569 | 0.301264382  | 0.001572 |
| DDX58      | 0.33082771   | 0.0210216 | 0.303190313  | 0.0331843 | 0.521172479  | 0.000237 |
| TFEB       | -0.46282999  | 0.0210443 | -0.266815677 | 0.1706917 | -0.164184724 | 0.404612 |
| YEATS4     | -0.270013089 | 0.0210634 | 0.007619411  | 0.9466646 | 0.151440503  | 0.182559 |
| ZDHHC13    | 0.315656768  | 0.0210732 | 0.422370107  | 0.001921  | 0.464922845  | 0.00061  |
| CYP2B7P    | 0.912502292  | 0.0211688 | 0.750212791  | 0.0581183 | 0.963320967  | 0.015656 |
| RREB1      | -0.370903619 | 0.0211765 | -0.277721104 | 0.0836959 | -0.26183866  | 0.103212 |
| AC241952.1 | -0.488285581 | 0.0211918 | 0.225822587  | 0.2653003 | -0.527673501 | 0.012236 |
| WARS       | 0.322017712  | 0.0211993 | 0.39202618   | 0.0049286 | 0.527953989  | 0.000152 |
| ZDHHC8     | 0.399476704  | 0.0212448 | -0.163554868 | 0.3508688 | 0.012443305  | 0.943296 |

|           |              |           |              |           |              |          |
|-----------|--------------|-----------|--------------|-----------|--------------|----------|
| CRBN      | -0.233682422 | 0.0213264 | -0.222651833 | 0.0266204 | -0.094607395 | 0.34788  |
| MPC2      | -0.318801442 | 0.0213169 | -0.367429245 | 0.0076825 | -0.18475449  | 0.179739 |
| PCDH12    | 1.239108985  | 0.0213472 | 0.738102731  | 0.1714503 | 0.585510823  | 0.281535 |
| HELZ2     | 0.587809226  | 0.0214017 | 0.46962254   | 0.0664879 | 0.547582294  | 0.032038 |
| PHAX      | -0.264713287 | 0.0214657 | -0.241528532 | 0.0351703 | -0.290529624 | 0.011477 |
| MRPS22    | -0.2062386   | 0.0215034 | -0.004192803 | 0.9620943 | -0.019791995 | 0.822986 |
| ARAP2     | 0.55721003   | 0.0215416 | 0.386216609  | 0.1110568 | 0.802607457  | 0.000909 |
| FBL       | 0.304763948  | 0.0215591 | 0.014570751  | 0.9125916 | 0.005308762  | 0.968171 |
| LYPLA2    | 0.226193554  | 0.0216296 | 0.036353047  | 0.711005  | 0.138916119  | 0.157183 |
| PNO1      | 0.320825175  | 0.0216027 | 0.282755701  | 0.0422461 | 0.319121302  | 0.02207  |
| SMURF1    | 0.231064289  | 0.0216252 | 0.317426023  | 0.0015657 | 0.442857538  | 1.00E-05 |
| ZNF204P   | -0.424059836 | 0.0216202 | -0.417618403 | 0.0227516 | -0.376720454 | 0.040216 |
| CARD8     | -0.334044674 | 0.0216563 | -0.355415868 | 0.0136682 | -0.451137408 | 0.002021 |
| KIF11     | -0.374119682 | 0.0216842 | 0.02898102   | 0.8582633 | -0.124262116 | 0.444478 |
| PPL       | -0.714455647 | 0.0217078 | -0.550942006 | 0.0763187 | -0.244439269 | 0.431416 |
| MMS19     | -0.21515245  | 0.0217256 | -0.237770262 | 0.0110852 | -0.277575702 | 0.003027 |
| MTCH1     | 0.20560426   | 0.0217608 | 0.138442153  | 0.1220882 | 0.218104623  | 0.014786 |
| NCAPD2    | -0.431077997 | 0.0217409 | -0.169340243 | 0.3666866 | -0.228386622 | 0.22392  |
| TOB1      | -0.486828317 | 0.0217556 | -0.462731043 | 0.0287843 | -0.656735521 | 0.001963 |
| NAA16     | -0.364044422 | 0.0217727 | -0.349086612 | 0.0270644 | -0.395992148 | 0.012288 |
| UHRF2     | -0.282239241 | 0.0217856 | -0.076369267 | 0.5327744 | -0.228451441 | 0.062493 |
| THAP6     | -0.297028001 | 0.0218702 | -0.153529941 | 0.2221527 | -0.370718325 | 0.003658 |
| CNKSR3    | 0.406816     | 0.0219399 | 0.464983053  | 0.0086916 | 0.354737697  | 0.045558 |
| RPS26     | -0.302596353 | 0.0219391 | -0.19042698  | 0.1481789 | -0.137627453 | 0.29619  |
| EBF2      | 2.284847032  | 0.0219636 | 0.828260074  | 0.4074701 | 2.975507394  | 0.002833 |
| KATNA1    | -0.364967021 | 0.0220103 | 0.034833002  | 0.8239206 | -0.121391615 | 0.443522 |
| TNRC6C    | 0.696154239  | 0.0220329 | 0.173960669  | 0.5671357 | -0.037218635 | 0.902726 |
| PRELID1P1 | -0.570675531 | 0.0220602 | -0.477138943 | 0.0511075 | -0.532194544 | 0.029451 |
| TYRO3     | -0.310647191 | 0.0221216 | -0.598094963 | 1.07E-05  | -0.48774002  | 0.000333 |
| SLC7A6OS  | -0.346151067 | 0.0221516 | -0.547908849 | 0.0002936 | -0.691465251 | 5.40E-06 |
| RPS6KB1   | 0.21920217   | 0.0221662 | 0.385913694  | 5.35E-05  | 0.400964595  | 2.68E-05 |
| MGAT5     | 0.256194249  | 0.0222577 | -0.130611817 | 0.2445898 | 0.305952886  | 0.006282 |
| STRA6     | 0.928714035  | 0.0222422 | 0.43995014   | 0.2794062 | 0.746502345  | 0.06623  |
| ZNF548    | -0.289787361 | 0.0222607 | -0.118034478 | 0.3443635 | -0.324177228 | 0.01016  |
| ANXA10    | 0.541232918  | 0.022321  | -0.240797421 | 0.3096143 | 0.606621317  | 0.010429 |
| TRMT44    | 0.313009079  | 0.0223363 | -0.27297453  | 0.0493818 | -0.006992108 | 0.959642 |
| GPSM1     | 0.510567172  | 0.0223655 | 0.230642858  | 0.3025238 | 0.042646734  | 0.849291 |
| TC-359D24 | -0.741261695 | 0.0224061 | -0.101225723 | 0.7465854 | -0.85597803  | 0.008043 |
| SHF       | 0.637121484  | 0.022412  | 0.421634182  | 0.129527  | -0.031619547 | 0.910611 |
| WDR66     | -0.379086774 | 0.0224602 | -0.532351746 | 0.0012265 | -0.681561095 | 4.54E-05 |
| TRIM71    | -0.746727218 | 0.0224709 | -0.745934212 | 0.022499  | -1.462759603 | 8.24E-06 |
| SRP19     | -0.281310452 | 0.0224994 | -0.009475882 | 0.9382996 | 0.038450371  | 0.753721 |
| ORC1      | -0.41117399  | 0.0225349 | -0.382789747 | 0.0323857 | -0.305955313 | 0.087556 |
| FILIP1L   | 0.388435282  | 0.0225858 | 0.297772229  | 0.080294  | 0.224936764  | 0.186713 |
| LCN9      | -0.674655436 | 0.0225954 | -1.052356459 | 0.0004032 | -1.182322054 | 7.67E-05 |
| ESYT3     | -0.868491788 | 0.0226592 | -0.347243704 | 0.347753  | -1.03933333  | 0.005483 |
| FNDC4     | 0.424916126  | 0.0226942 | 0.436011442  | 0.0185729 | 0.330007509  | 0.07639  |

|             |              |           |              |           |              |          |
|-------------|--------------|-----------|--------------|-----------|--------------|----------|
| SMOX        | 0.740612585  | 0.0227174 | 0.535124705  | 0.0997699 | 0.870379482  | 0.007371 |
| PSD         | 0.712714092  | 0.0227635 | 0.66564974   | 0.032499  | 0.19296402   | 0.542001 |
| SVIL        | 0.347746662  | 0.0227593 | 0.42644599   | 0.0051602 | 0.351246926  | 0.021317 |
| RFX1        | 0.623300733  | 0.0228055 | 0.401890826  | 0.1416301 | 0.194384295  | 0.479315 |
| SAFB        | -0.233584203 | 0.0227969 | -0.157651711 | 0.1219764 | -0.153344805 | 0.133419 |
| RLF         | 0.203634915  | 0.0228623 | 0.328168849  | 0.0002262 | 0.565585126  | 1.93E-10 |
| HDHD2       | -0.259058125 | 0.0230648 | -0.137936834 | 0.2211741 | -0.116061126 | 0.305083 |
| VDR         | 0.530384972  | 0.023085  | 0.276763171  | 0.2355017 | 0.711885967  | 0.002105 |
| HEATR3      | -0.35521147  | 0.0231486 | -0.102674707 | 0.5074262 | -0.113528729 | 0.463416 |
| EPHX1       | 0.568147654  | 0.023186  | 0.309353086  | 0.217449  | 0.311064679  | 0.215631 |
| BSCL2       | 0.425855259  | 0.0232403 | 0.092069127  | 0.6248748 | 0.004072532  | 0.982778 |
| OTUB1       | 0.177835545  | 0.0232336 | -0.072998759 | 0.3523009 | 0.003237334  | 0.967109 |
| SNX7        | -0.22629172  | 0.0232352 | -0.253181657 | 0.0103053 | 0.055862803  | 0.568125 |
| ZNF718      | -0.559769708 | 0.0232129 | -0.184245181 | 0.4427434 | -0.41026583  | 0.091577 |
| MRS2        | -0.301515438 | 0.0233048 | -0.007904313 | 0.952174  | -0.204541001 | 0.122198 |
| TUBE1       | -0.33702556  | 0.0233413 | 0.209156306  | 0.1484541 | 0.107054034  | 0.465184 |
| RHOB        | 0.506857177  | 0.02338   | 0.239084678  | 0.2849116 | 0.658008341  | 0.003227 |
| RAE1        | -0.244363528 | 0.0233933 | -0.174251522 | 0.1035097 | -0.315140784 | 0.00347  |
| DLEC1       | -0.78916697  | 0.0234398 | -0.584991707 | 0.0935456 | -1.224631999 | 0.000624 |
| FNDC3B      | 0.401936932  | 0.0234448 | 0.362975769  | 0.0406241 | 0.407846886  | 0.021444 |
| MAPK7       | 0.451104651  | 0.0234181 | 0.478950912  | 0.0158007 | 0.427685936  | 0.031474 |
| MTHFD2      | 0.44768189   | 0.0234357 | 0.409792666  | 0.0379533 | 0.812260804  | 3.85E-05 |
| AKAP13      | 0.268653235  | 0.023499  | -0.05187168  | 0.6620544 | 0.372361497  | 0.001671 |
| KIAA1958    | 0.327072138  | 0.0234888 | -0.154637263 | 0.2830211 | -0.220883281 | 0.127869 |
| PSD4        | -0.360126565 | 0.0235845 | -0.245145513 | 0.1215126 | -0.144281188 | 0.363182 |
| MITD1       | -0.270299858 | 0.0237161 | 0.001955143  | 0.9865944 | -0.036446988 | 0.755994 |
| CEP290      | -0.286551281 | 0.0238118 | -0.099973732 | 0.4274256 | -0.161531013 | 0.200943 |
| PAXBP1      | -0.227762842 | 0.0238135 | -0.258654933 | 0.0099152 | -0.353466021 | 0.000445 |
| TNFAIP6     | 1.032932899  | 0.0239293 | 0.575251676  | 0.2108096 | 1.334469271  | 0.003408 |
| CERS6       | 0.234612505  | 0.0240013 | 0.035484862  | 0.732725  | 0.373932415  | 0.000311 |
| CCT6P1      | -0.430406315 | 0.0240551 | -0.192103959 | 0.2967252 | -0.731074173 | 0.000147 |
| PSRC1       | -0.505390423 | 0.0240457 | -0.302660699 | 0.1710895 | -0.658235261 | 0.003352 |
| CCDC117     | -0.276734418 | 0.0240807 | -0.121220959 | 0.3203535 | -0.206930571 | 0.090275 |
| RP1-152L7.1 | -0.54700809  | 0.0241511 | -0.383059742 | 0.1124331 | -0.457978613 | 0.058554 |
| ZNF337      | -0.228080109 | 0.024154  | -0.160974558 | 0.1018862 | -0.293783624 | 0.00332  |
| MMP25       | 1.136965408  | 0.0241945 | 0.937088171  | 0.0627645 | 0.643885593  | 0.199968 |
| UBC         | 0.35094261   | 0.0241955 | 0.214686318  | 0.1679013 | 0.363009445  | 0.019714 |
| ARF4        | 0.235515215  | 0.024257  | -0.018322511 | 0.8608266 | 0.286722827  | 0.006038 |
| EFCAB2      | -0.385551184 | 0.0242554 | -0.160174045 | 0.3326262 | -0.322505179 | 0.055312 |
| FAM129A     | 0.643759919  | 0.0242891 | 0.271974504  | 0.3431177 | 1.145355995  | 5.78E-05 |
| NRBF2       | 0.227342156  | 0.0242569 | -0.06384989  | 0.527599  | 0.119438526  | 0.236031 |
| ORC2        | -0.278186824 | 0.0242867 | -0.07095938  | 0.5626495 | -0.146329592 | 0.23342  |
| PPP1CC      | -0.17130455  | 0.0242809 | -0.082332199 | 0.277312  | -0.198268543 | 0.008984 |
| SQLE        | -0.245432306 | 0.0242939 | -0.006784707 | 0.9503122 | 0.103411984  | 0.342122 |
| MORN2       | -0.374724843 | 0.0243654 | 0.006010856  | 0.9698329 | -0.060608505 | 0.706062 |
| NUP37       | -0.253245734 | 0.0245106 | -0.043297063 | 0.6939476 | -0.152288247 | 0.16991  |
| SERPINI1    | -0.800028928 | 0.0245073 | -0.504411051 | 0.1510123 | -0.58586954  | 0.09619  |

|          |              |           |              |           |              |          |
|----------|--------------|-----------|--------------|-----------|--------------|----------|
| USP53    | 0.38745617   | 0.0245903 | 0.34606771   | 0.0446555 | 0.677439762  | 8.32E-05 |
| CAD      | -0.319924105 | 0.0246417 | -0.079103237 | 0.5765058 | -0.187880594 | 0.186491 |
| DNMBP    | -0.249492004 | 0.0246598 | -0.351090025 | 0.001507  | -0.298514651 | 0.007069 |
| HSF1     | 0.329888542  | 0.0246457 | -0.051052231 | 0.7285379 | 0.134458457  | 0.3596   |
| KNSTRN   | -0.340245054 | 0.0246545 | 0.037709807  | 0.8000666 | -0.108243284 | 0.470046 |
| VGLL3    | 0.901159076  | 0.0246346 | 0.542666025  | 0.1757615 | 0.967192927  | 0.015784 |
| SYF2     | -0.245557991 | 0.0246955 | -0.101482156 | 0.3466695 | -0.092694246 | 0.390943 |
| ZNF75A   | -0.313004466 | 0.0246846 | -0.290887689 | 0.0356734 | -0.190186556 | 0.168483 |
| FKBP11   | 0.450683277  | 0.0247101 | 0.112860136  | 0.5724194 | 0.55628664   | 0.005345 |
| C19orf52 | -0.427764186 | 0.0247619 | -0.506501322 | 0.0070869 | -0.514666526 | 0.006433 |
| DDB1     | 0.159448185  | 0.0247751 | 0.170262698  | 0.0163345 | 0.188107508  | 0.008002 |
| MT-ATP8  | 0.751311143  | 0.0247999 | 0.021208342  | 0.9495929 | -0.06174678  | 0.854117 |
| PCDHGB4  | 0.593427016  | 0.0247962 | 0.557529964  | 0.0346328 | 0.352293923  | 0.183114 |
| TMEM74B  | 0.782364659  | 0.0248427 | 0.080471868  | 0.8205055 | -0.249281678 | 0.492335 |
| DECR2    | -0.672970619 | 0.0249438 | -0.230479619 | 0.433497  | -0.413132913 | 0.165686 |
| SPIN3    | 0.436413615  | 0.0249912 | 0.146919695  | 0.4515219 | -0.035931526 | 0.857013 |
| NAA50    | 0.337323994  | 0.0250581 | 0.301675536  | 0.0445302 | 0.382567153  | 0.010932 |
| LRCH1    | 0.250681658  | 0.0251211 | 0.119070473  | 0.2845302 | 0.088872142  | 0.426165 |
| APOL1    | 0.907955894  | 0.0251344 | 1.083521894  | 0.0072126 | 1.927198494  | 1.56E-06 |
| SCML4    | -0.862290344 | 0.0251542 | -1.01347196  | 0.0080131 | -1.503973602 | 0.000157 |
| EIF4G2   | 0.338785163  | 0.0251979 | 0.463262893  | 0.0022061 | 0.380253734  | 0.01199  |
| HS2ST1   | -0.276222997 | 0.0252583 | -0.099673956 | 0.4179304 | -0.144754713 | 0.240243 |
| RAD54L2  | 0.211439348  | 0.0252568 | 0.070812967  | 0.4526168 | 0.043242518  | 0.647502 |
| CTSE     | 0.44830057   | 0.0254127 | 0.239320678  | 0.2328006 | 0.926066373  | 3.88E-06 |
| DHODH    | -0.360782292 | 0.0254309 | -0.077076435 | 0.623686  | -0.422405292 | 0.008179 |
| ADAM11   | 1.204622458  | 0.0254451 | 0.281025688  | 0.6062613 | -0.179428704 | 0.74476  |
| ANKS4B   | -0.86677357  | 0.0255225 | -0.688326912 | 0.0755369 | -1.500823233 | 0.000116 |
| NR1H2    | 0.336301987  | 0.0255158 | 0.016053929  | 0.9152811 | 0.461757661  | 0.002022 |
| NBR2     | 1.216630059  | 0.025536  | 0.502650402  | 0.3526002 | 0.657190243  | 0.22651  |
| SPAG9    | 0.307735784  | 0.0255617 | 0.236568773  | 0.0854055 | 0.232940976  | 0.090389 |
| RBMXL1   | -0.233158205 | 0.0255838 | -0.249934849 | 0.0159286 | -0.143073944 | 0.167507 |
| SMPD1    | 0.426382069  | 0.0256264 | 0.239840167  | 0.2084491 | 0.052329116  | 0.784598 |
| SPATA2   | 0.341680035  | 0.0256668 | -0.205558267 | 0.1889894 | -0.195750695 | 0.214107 |
| ZBTB9    | -0.322261057 | 0.025721  | -0.574405965 | 7.11E-05  | -0.637832412 | 1.23E-05 |
| EEF1A1P1 | -0.611453725 | 0.0257606 | -0.282992024 | 0.2787015 | -0.004448005 | 0.986242 |
| B4GALT7  | 0.281615526  | 0.0257787 | -0.012260015 | 0.9222888 | 0.189224904  | 0.134226 |
| SPEG     | 0.696847733  | 0.0258002 | 0.390955454  | 0.2109308 | -0.230799629 | 0.465621 |
| ASAH2B   | -0.416983556 | 0.0258275 | -0.307948964 | 0.0953126 | -0.152122063 | 0.410468 |
| CEP70    | -0.241916449 | 0.0258528 | 0.021709483  | 0.8383616 | -0.03355344  | 0.754367 |
| OXSM     | -0.490953775 | 0.0258884 | -0.162811034 | 0.4402904 | -0.129694128 | 0.539224 |
| ZNF554   | -0.325719341 | 0.0258895 | -0.112820243 | 0.4305493 | -0.176118255 | 0.223022 |
| PPP2R1B  | 0.26823186   | 0.0259135 | 0.047634934  | 0.692117  | 0.123636273  | 0.304718 |
| CTGF     | 0.754524391  | 0.0259784 | 0.089044923  | 0.792956  | 0.134685857  | 0.691407 |
| B3GALT2  | -0.762410289 | 0.0260383 | -0.382479114 | 0.2593042 | -0.890656774 | 0.009301 |
| CDC37    | 0.237845458  | 0.0261038 | 0.131167579  | 0.2194011 | 0.302231954  | 0.004616 |
| SFN      | -0.483295496 | 0.0261289 | -0.502287598 | 0.0201123 | 0.029411433  | 0.89081  |
| WDR60    | -0.471393584 | 0.0261427 | -0.308426163 | 0.1450616 | -0.401973086 | 0.057977 |



|              |              |           |              |           |              |          |
|--------------|--------------|-----------|--------------|-----------|--------------|----------|
| AC243772.2   | 0.452012846  | 0.0261591 | 0.423523662  | 0.0347902 | -0.032982126 | 0.874259 |
| DDX3X        | 0.438738783  | 0.0262047 | 0.448206064  | 0.0230483 | 0.654530585  | 0.0009   |
| HSPE1P3      | -1.516515334 | 0.0262279 | 0.581486239  | 0.3755033 | 0.153954473  | 0.815287 |
| RQCD1        | 0.201626608  | 0.0262423 | 0.216419996  | 0.0166712 | 0.19851077   | 0.028236 |
| RP11-76217.1 | 0.784439182  | 0.0262617 | 0.297964329  | 0.4007703 | -0.137532158 | 0.699679 |
| TPMT         | -0.259749301 | 0.026325  | 0.017395127  | 0.8794887 | -0.096413615 | 0.40403  |
| TRIM65       | -0.378329617 | 0.0263172 | -0.344825292 | 0.039991  | -0.494809306 | 0.003372 |
| EMC10        | 0.224023248  | 0.026343  | 0.058119483  | 0.5638955 | 0.220559012  | 0.028467 |
| CD101        | -0.933764214 | 0.0264042 | -0.070391634 | 0.8623722 | -0.498753669 | 0.232725 |
| MRPS26       | -0.339063421 | 0.0264793 | -0.420087274 | 0.0056695 | -0.355483937 | 0.019385 |
| XPA          | -0.354898153 | 0.0264736 | -0.123076522 | 0.4360625 | -0.362538854 | 0.02245  |
| TNFRSF14     | 0.802344582  | 0.0265288 | -0.012199709 | 0.9741951 | 0.227515238  | 0.542057 |
| KCNE1        | 0.794728504  | 0.0265988 | 0.620100666  | 0.0847258 | 0.663834783  | 0.064426 |
| PPAT         | -0.327851134 | 0.0265975 | -0.18357641  | 0.2112733 | -0.125823761 | 0.391839 |
| ARHGAP18     | -0.285514561 | 0.0267689 | -0.433739267 | 0.0007578 | -0.086339655 | 0.501654 |
| CHST1        | 0.924758861  | 0.0267734 | 0.617699439  | 0.1413624 | -0.457855471 | 0.296696 |
| EEF1GP1      | 0.297135011  | 0.026702  | 0.157851572  | 0.2373279 | 0.342239659  | 0.010163 |
| ERBB3        | -0.329992539 | 0.0266888 | -0.420582894 | 0.0047213 | -0.337625523 | 0.023301 |
| FAM174A      | -0.378007292 | 0.0267172 | -0.128536966 | 0.4407456 | 0.050072787  | 0.760843 |
| ISG20        | 0.585516081  | 0.0267297 | 0.170284293  | 0.5202766 | 0.799399741  | 0.002418 |
| MCTP2        | -0.522179835 | 0.0267285 | -0.24927313  | 0.2871501 | -0.299050937 | 0.202788 |
| SEZ6L2       | 0.978048746  | 0.0267133 | 0.528023968  | 0.2319304 | 0.481216298  | 0.276117 |
| STRBP        | -0.276488959 | 0.026739  | -0.146519716 | 0.2369382 | -0.092757221 | 0.454743 |
| TPX2         | -0.38550881  | 0.0267727 | -0.404167954 | 0.0201241 | -0.510697308 | 0.003343 |
| AFM          | -1.355400414 | 0.0269505 | -1.49215764  | 0.0156372 | -1.058362295 | 0.081667 |
| TB-134H23.1  | 1.056634535  | 0.0270072 | 0.278941069  | 0.5531471 | 0.380236331  | 0.418764 |
| EFNA4        | -0.397354249 | 0.0269693 | -0.367216438 | 0.036135  | -0.502049732 | 0.005187 |
| GATA4        | -0.678833283 | 0.0270188 | -1.138695674 | 0.0002165 | -1.009315483 | 0.001018 |
| IFT74        | -0.30548953  | 0.0269189 | -0.048188352 | 0.722773  | -0.13033049  | 0.339833 |
| KDM1A        | -0.163762043 | 0.0269236 | -0.027750683 | 0.7061765 | -0.027834764 | 0.705737 |
| KIF14        | -0.901973019 | 0.0269116 | -0.382602378 | 0.3434994 | -0.26457011  | 0.512358 |
| LMAN2L       | -0.223697273 | 0.0269915 | -0.33582161  | 0.0008509 | -0.268900522 | 0.007646 |
| LYSMD3       | -0.359992061 | 0.0269483 | -0.291114632 | 0.0728248 | -0.274196605 | 0.091217 |
| MCEE         | -0.444437084 | 0.0269197 | -0.512204576 | 0.0102096 | -0.151375931 | 0.446007 |
| MEOX1        | 1.698311037  | 0.0268382 | 1.040906502  | 0.1753675 | 2.050260692  | 0.007459 |
| NDUFAF6      | -0.350420693 | 0.0269624 | -0.059871361 | 0.6949087 | -0.242484664 | 0.119995 |
| NUF2         | -0.405715749 | 0.0269069 | 0.18328772   | 0.3073839 | -0.16995796  | 0.348529 |
| RHOQP1       | -0.875421946 | 0.0270143 | 0.320953999  | 0.3594203 | -0.850096894 | 0.028682 |
| RPS17L       | -0.359276816 | 0.0269619 | -0.024982151 | 0.8776714 | 0.10217199   | 0.529006 |
| SH3GL1       | 0.236706546  | 0.0269904 | -0.00525888  | 0.960821  | 0.072599549  | 0.497843 |
| STARD3NL     | 0.172054262  | 0.0270206 | 0.163384411  | 0.0333888 | 0.274693498  | 0.000354 |
| TMEM245      | -0.195881062 | 0.0269147 | -0.351388103 | 7.13E-05  | -0.225006735 | 0.010936 |
| UBALD1       | 0.46165248   | 0.0270283 | -0.212606216 | 0.3160773 | -0.06745343  | 0.750276 |
| EIF1         | 0.381779668  | 0.0271107 | -0.048062905 | 0.7809769 | 0.204785177  | 0.23586  |
| ADNP         | -0.34679237  | 0.0271409 | -0.302870475 | 0.0533161 | -0.411441171 | 0.008718 |
| LGR4         | -0.26557916  | 0.0271572 | -0.336512241 | 0.0050857 | -0.186333486 | 0.120754 |
| PRPF8        | -0.364568321 | 0.0271622 | 0.054397377  | 0.7415308 | -0.0796441   | 0.629167 |

|            |              |           |              |           |              |          |
|------------|--------------|-----------|--------------|-----------|--------------|----------|
| TXNL4B     | -0.350205167 | 0.0271359 | -0.296839163 | 0.0574784 | -0.360942343 | 0.021961 |
| GLP2R      | 0.742777577  | 0.0271901 | -0.043543597 | 0.8976692 | 0.371562076  | 0.270364 |
| KBTBD3     | -0.642959623 | 0.027267  | -0.852866073 | 0.0031032 | -0.975492808 | 0.000805 |
| ACN9       | -0.390546821 | 0.0273049 | -0.244849613 | 0.1599134 | -0.180422244 | 0.302355 |
| CCDC134    | -0.37599814  | 0.0273156 | -0.24359408  | 0.141618  | -0.361570635 | 0.032297 |
| TNNC1      | -0.676516236 | 0.0273027 | -0.184991448 | 0.5339159 | -0.492839302 | 0.102606 |
| JMJD6      | 0.308204091  | 0.0273475 | 0.118787439  | 0.3930268 | 0.422967767  | 0.002298 |
| TD-2561J22 | -0.487940415 | 0.0274137 | -0.577622456 | 0.0084636 | -0.710167207 | 0.001403 |
| SPTSSB     | -0.904066637 | 0.0274241 | -0.984797808 | 0.0163921 | -0.057153332 | 0.887704 |
| C14orf142  | -0.38269604  | 0.0274457 | -0.206523448 | 0.2088569 | -0.144278374 | 0.38212  |
| BFAR       | -0.288438163 | 0.0274731 | -0.186264103 | 0.1532657 | -0.081442693 | 0.53242  |
| SF3B14     | -0.1985233   | 0.0274883 | 0.122181944  | 0.1673097 | 0.042365935  | 0.633734 |
| BAIAP2L2   | 0.812751677  | 0.0275333 | 0.870325017  | 0.0178776 | -0.068856232 | 0.853352 |
| IP11-438J1 | 0.51164207   | 0.0275507 | 0.294542208  | 0.2042775 | 0.837495186  | 0.000259 |
| RC3H1      | 0.311299749  | 0.0275723 | 0.158643748  | 0.2611692 | 0.117890052  | 0.404061 |
| U2SURP     | -0.216851975 | 0.0275973 | -0.099406793 | 0.311737  | -0.108174367 | 0.271239 |
| APLP1      | 0.664491239  | 0.0276282 | 0.213904416  | 0.479432  | 0.479543901  | 0.112674 |
| FAM53B     | -0.318771408 | 0.0276222 | -0.287830209 | 0.0455591 | -0.385592448 | 0.007621 |
| GPR50      | 1.41110208   | 0.0276641 | 0.945912356  | 0.1405069 | 0.364510852  | 0.572405 |
| STX8       | -0.234911169 | 0.02767   | -0.284608268 | 0.0066291 | -0.151961552 | 0.148115 |
| MCAT       | -0.310090058 | 0.0277481 | -0.290970471 | 0.0356147 | -0.169471176 | 0.221105 |
| PSMC5      | -0.222618636 | 0.0277614 | 0.019816119  | 0.8423959 | -0.071028506 | 0.478704 |
| FAS        | 0.585235471  | 0.0277929 | 0.62299302   | 0.0188323 | 0.226517855  | 0.394969 |
| CDC42BPB   | 0.189479632  | 0.0278087 | -0.011910022 | 0.8898484 | 0.067112809  | 0.435564 |
| CDKN2B     | 0.762973838  | 0.0278247 | 0.625779965  | 0.0710306 | 1.094368591  | 0.001581 |
| USP11      | 0.324761702  | 0.0278335 | 0.051228693  | 0.728765  | 0.161985407  | 0.272645 |
| CD59       | 0.364208282  | 0.0279109 | 0.231986243  | 0.1611801 | 0.470758025  | 0.004459 |
| TNFRSF21   | 0.275085337  | 0.027908  | -0.007183387 | 0.9542287 | 0.151268873  | 0.226609 |
| TUBA1C     | 0.341675672  | 0.027905  | 0.362173477  | 0.0197428 | 0.58425803   | 0.000169 |
| AP001885.1 | -0.794186173 | 0.0280073 | 0.290341479  | 0.3489883 | -0.436691147 | 0.195842 |
| FAM178A    | -0.320624848 | 0.0280002 | -0.006363029 | 0.9649648 | -0.220921005 | 0.128656 |
| FNIP1      | -0.172462336 | 0.0279831 | -0.094598394 | 0.2229855 | -0.046694603 | 0.548944 |
| PRUNE2     | -0.690526047 | 0.0280054 | -0.496514995 | 0.112105  | -0.595533226 | 0.06149  |
| SLAIN2     | 0.390687693  | 0.0280239 | 0.227745178  | 0.2000371 | 0.18459954   | 0.299022 |
| C6orf47    | -0.229789587 | 0.0280631 | -0.182335998 | 0.0768818 | -0.125984274 | 0.222508 |
| SERAC1     | -0.275221059 | 0.02807   | -0.114504758 | 0.3538381 | -0.084928292 | 0.491489 |
| NRIP1      | 0.180161635  | 0.0282303 | -0.088937555 | 0.2787847 | 0.006139389  | 0.940397 |
| ZBTB46     | 0.72200242   | 0.0282461 | 0.690344224  | 0.0355517 | 0.307150288  | 0.350916 |
| FHDC1      | 0.487292915  | 0.0282636 | -0.241358548 | 0.2804471 | 0.405804813  | 0.067533 |
| ASPM       | -0.408436587 | 0.0283113 | 0.10706838   | 0.5643097 | -0.128691275 | 0.488843 |
| FAM129C    | -0.374063885 | 0.0284053 | 0.047988521  | 0.7716542 | -0.198193145 | 0.237649 |
| USP30      | -0.48865175  | 0.0284285 | -0.376651618 | 0.0899571 | -0.649355895 | 0.003686 |
| CDHR3      | -0.754953035 | 0.0284469 | -0.377179896 | 0.2585754 | -0.145362599 | 0.663102 |
| TD-2521M24 | -0.845151991 | 0.0284548 | -0.352713955 | 0.3287845 | -0.388424565 | 0.287142 |
| RAB4A      | -0.274276817 | 0.0284971 | -0.160989683 | 0.1956442 | -0.177460892 | 0.155731 |
| PTPRC      | -0.631483987 | 0.0286815 | -0.020146237 | 0.9415267 | -0.350232154 | 0.21248  |
| STX3       | -0.433208826 | 0.0286785 | -0.467330839 | 0.0180532 | -0.138556641 | 0.482973 |

|          |              |           |              |           |              |          |
|----------|--------------|-----------|--------------|-----------|--------------|----------|
| EMILIN3  | 1.042154132  | 0.0286991 | 0.750284199  | 0.1157395 | 0.643294411  | 0.179813 |
| SAPCD2   | -0.516593695 | 0.028723  | -0.398127129 | 0.0897777 | -0.302937411 | 0.196738 |
| PI4KB    | 0.250216929  | 0.0287549 | -0.142439525 | 0.21442   | 0.135862663  | 0.235736 |
| RAB7A    | 0.403225434  | 0.028763  | 0.500604082  | 0.0066218 | 0.565337928  | 0.002162 |
| TTLL4    | 0.210293991  | 0.0287645 | -0.020204076 | 0.8337807 | 0.076186361  | 0.429716 |
| ADAM17   | 0.234584952  | 0.0288322 | 0.098410701  | 0.3585477 | 0.32041882   | 0.002755 |
| RPL36A   | -0.396611833 | 0.0288821 | -0.475907143 | 0.0086923 | -0.101001161 | 0.57724  |
| KDELC1   | -0.414680834 | 0.0289148 | -0.234739783 | 0.2108221 | -0.399362097 | 0.034267 |
| GOSR2    | -0.204668145 | 0.0289323 | 0.006477144  | 0.9440261 | 0.038128576  | 0.680159 |
| ATP2B4   | 0.284716885  | 0.0289662 | -0.118722354 | 0.3626415 | 0.02673258   | 0.837568 |
| MMP7     | 1.522311111  | 0.0289746 | 2.635274731  | 0.0001544 | 2.986506287  | 1.80E-05 |
| USP20    | -0.443953922 | 0.0289768 | -0.222866896 | 0.2712181 | -0.199385558 | 0.325334 |
| FAM63B   | -0.222994533 | 0.0290251 | -0.125790666 | 0.2160801 | -0.215267809 | 0.034855 |
| C6orf211 | -0.240353927 | 0.0290694 | -0.12254572  | 0.2611714 | -0.248927797 | 0.023244 |
| DEK      | -0.292969595 | 0.0290697 | -0.011433776 | 0.9319962 | -0.06928669  | 0.605189 |
| ZNF83    | -0.210494516 | 0.0291237 | -0.027170344 | 0.7756415 | 0.05131667   | 0.59068  |
| CCDC25   | -0.268067937 | 0.0291886 | -0.184626039 | 0.1316637 | -0.068903544 | 0.57355  |
| PIGM     | -0.316863929 | 0.0292142 | -0.280156061 | 0.0511661 | -0.29299531  | 0.042293 |
| SERPINB5 | -1.824333267 | 0.0292542 | -0.79196418  | 0.3176601 | 0.876469439  | 0.257233 |
| ACAD11   | -0.501430545 | 0.0292756 | 0.136579466  | 0.5478467 | -0.327810158 | 0.153908 |
| HJURP    | -0.534250013 | 0.029288  | -0.348013737 | 0.1531056 | -0.460433353 | 0.059295 |
| ABHD6    | -0.392771882 | 0.0293797 | -0.170948743 | 0.334789  | -0.367550378 | 0.040153 |
| SLC35D1  | -0.386611873 | 0.029393  | -0.047608679 | 0.7877143 | -0.212438826 | 0.230262 |
| PEAR1    | 0.930647461  | 0.0294204 | 0.263216569  | 0.5381247 | 0.612505989  | 0.150934 |
| SETD4    | -0.324059821 | 0.0294367 | -0.479253071 | 0.0011646 | -0.288065899 | 0.051392 |
| SYTL1    | -0.554101578 | 0.0294296 | -0.327479876 | 0.1951222 | -0.16903807  | 0.503137 |
| SLFN12L  | 0.615951481  | 0.0295327 | 0.761047032  | 0.0060183 | 0.370683012  | 0.190541 |
| CNPPD1   | -0.267239459 | 0.0296205 | -0.194984186 | 0.1062018 | -0.075389625 | 0.531229 |
| FGD3     | -1.50373223  | 0.0296363 | -1.229444286 | 0.0718974 | -1.972793234 | 0.005394 |
| ABRACL   | -0.277639212 | 0.0298343 | -0.025244877 | 0.8397736 | 0.113270862  | 0.363491 |
| KRT5     | -3.34410056  | 0.029831  | -1.570075983 | 0.3017764 | 1.382237335  | 0.362043 |
| LIMD1    | 0.228633267  | 0.0298531 | -0.077690346 | 0.4576238 | -0.271019217 | 0.010096 |
| PDIK1L   | -0.683474734 | 0.0298145 | -0.979183617 | 0.0018777 | -0.804561718 | 0.010442 |
| TPD52L2  | 0.215932145  | 0.0298419 | 0.123791877  | 0.2118219 | 0.200740067  | 0.043026 |
| TRIM8    | 0.31425408   | 0.0298377 | 0.024156431  | 0.8674031 | 0.062094357  | 0.667817 |
| SP6      | -0.916623391 | 0.0299404 | -0.387831847 | 0.3456678 | -1.490367553 | 0.000545 |
| SLC13A3  | 0.62936715   | 0.029975  | 0.291846143  | 0.3186287 | 0.394600262  | 0.173548 |
| C4orf46  | -0.323235571 | 0.0300226 | -0.152563288 | 0.3024984 | -0.177654941 | 0.230994 |
| KHDRBS1  | 0.191470707  | 0.0300298 | 0.151079745  | 0.0860695 | 0.160483689  | 0.068569 |
| SPSB2    | -0.439368078 | 0.0300227 | -0.453443281 | 0.022865  | -0.4329459   | 0.031678 |
| BCAM     | 0.477750704  | 0.0300563 | 0.314564425  | 0.1524234 | -0.327072946 | 0.139103 |
| RFWD2    | -0.2051336   | 0.030093  | -0.067596998 | 0.4714069 | 0.149652284  | 0.110302 |
| C11orf48 | -0.249222095 | 0.0301155 | -0.056833151 | 0.6155733 | 0.005764767  | 0.959464 |
| ZNF638   | -0.22591212  | 0.0301353 | 0.026463462  | 0.7992994 | -0.173735803 | 0.095405 |
| CDK11B   | 0.378270745  | 0.0302163 | 0.145731906  | 0.4045887 | 0.078775403  | 0.652563 |
| SLC38A2  | 0.278144551  | 0.0302174 | -0.033679107 | 0.7930367 | 0.146156142  | 0.254794 |
| SNX2     | -0.253703735 | 0.0302417 | -0.221044249 | 0.05828   | 0.081211434  | 0.485631 |

|            |              |           |              |           |              |          |
|------------|--------------|-----------|--------------|-----------|--------------|----------|
| NAIF1      | -0.505830401 | 0.0302562 | -0.729817821 | 0.0014707 | -0.782835411 | 0.000748 |
| RBM12B     | -0.415577744 | 0.0302671 | -0.09292543  | 0.6264791 | -0.225494358 | 0.239084 |
| NDUFA10    | 0.654310272  | 0.0302958 | 0.5716053    | 0.0574743 | 0.501322513  | 0.096359 |
| FUT10      | -0.313534386 | 0.0303291 | -0.161665244 | 0.2593162 | -0.135975362 | 0.344336 |
| NSUN2      | 0.169394131  | 0.0303362 | 0.129401597  | 0.0963504 | 0.119043723  | 0.125962 |
| ZNF532     | 0.320869808  | 0.0303329 | 0.673572176  | 5.15E-06  | 0.029583106  | 0.841874 |
| PIP4K2A    | -0.359506819 | 0.0304523 | 0.351538082  | 0.032997  | -0.34072137  | 0.040253 |
| RBM38      | 0.549308824  | 0.0304779 | 0.62435287   | 0.0135804 | 0.40367029   | 0.112452 |
| NPC2       | 0.204004188  | 0.0306218 | 0.189077926  | 0.0447628 | 0.432347587  | 4.22E-06 |
| TOX4       | 0.262155915  | 0.0306604 | 0.215676559  | 0.0750254 | 0.287589623  | 0.017605 |
| VCL        | 0.235539591  | 0.0306651 | 0.099289616  | 0.362135  | 0.049601514  | 0.649065 |
| TLN1       | 0.294767701  | 0.0306829 | 0.306730921  | 0.0244873 | -0.092351257 | 0.498683 |
| MTO1       | 0.295535336  | 0.0306981 | 0.275169351  | 0.0424007 | 0.107077088  | 0.431753 |
| ACE        | 0.846179186  | 0.0308081 | 0.581727457  | 0.1262277 | 0.678647096  | 0.084464 |
| AC010240.2 | 0.485147309  | 0.0308429 | 0.711960848  | 0.0010098 | 0.352193452  | 0.116886 |
| RBL2       | -0.168357938 | 0.0308342 | -0.203863253 | 0.0087155 | -0.28052522  | 0.000306 |
| BNIP3P1    | -1.936824543 | 0.0308723 | 0.066445711  | 0.9403333 | -0.379464425 | 0.670213 |
| HHIP       | 0.714280839  | 0.030908  | 0.719850626  | 0.0294801 | 0.421653392  | 0.20272  |
| ZNF608     | -0.332747367 | 0.0309361 | -0.207099165 | 0.1781561 | -0.374773904 | 0.015088 |
| ZNF594     | -0.409911858 | 0.0309574 | -0.034427952 | 0.8525173 | -0.253369539 | 0.175315 |
| FBXO22     | -0.302540539 | 0.03101   | -0.249165961 | 0.0738354 | -0.332518853 | 0.017463 |
| PIGY       | 0.69647308   | 0.0310101 | 0.125632936  | 0.7007334 | 0.07451099   | 0.820815 |
| STYK1      | 0.642935999  | 0.0309882 | 0.159732816  | 0.5939465 | 1.531829164  | 2.31E-07 |
| MRPL2      | -0.308107206 | 0.0310442 | -0.140929422 | 0.3150303 | -0.083076168 | 0.556001 |
| UHRF1BP1   | 0.160752746  | 0.0310395 | 0.072079868  | 0.3300517 | 0.238807863  | 0.00122  |
| NUP188     | 0.300166159  | 0.0311184 | 0.251533224  | 0.0706284 | 0.040050602  | 0.773722 |
| ZNF598     | 0.416512241  | 0.0311311 | 0.042506817  | 0.8261462 | 0.246022684  | 0.202541 |
| CCDC124    | 0.398864647  | 0.0311611 | 0.21005776   | 0.2555373 | 0.39746275   | 0.031145 |
| EMC8       | 0.247737643  | 0.0311614 | 0.242022646  | 0.0334176 | 0.246040096  | 0.03075  |
| ZNF570     | -0.37674228  | 0.0312661 | -0.303113997 | 0.0800846 | -0.875059362 | 6.45E-07 |
| RNASE10    | 0.675109463  | 0.0313978 | 0.0036566    | 0.9909646 | -0.21131535  | 0.523495 |
| C6orf163   | -0.632751713 | 0.0314802 | -0.004466927 | 0.9871481 | -0.614752768 | 0.034214 |
| SMTNL2     | -1.225091735 | 0.0314674 | -2.009837865 | 0.000415  | -1.529920607 | 0.007346 |
| C6orf62    | 0.234758763  | 0.0315952 | -0.063304184 | 0.5619931 | 0.250921705  | 0.021302 |
| GCSH       | -0.324139559 | 0.0316599 | -0.062701119 | 0.6747783 | -0.109869652 | 0.463682 |
| NUDT6      | 0.583669003  | 0.0316638 | -0.037200438 | 0.8899386 | 0.148979323  | 0.585181 |
| PLAG1      | -0.316423945 | 0.0316139 | -0.258995026 | 0.0766369 | -0.355345503 | 0.01571  |
| PLRG1      | -0.193307063 | 0.0316652 | -0.281451964 | 0.0016145 | -0.198277758 | 0.026781 |
| YBX3       | 0.305272008  | 0.0316349 | 0.290998974  | 0.040188  | 0.471038306  | 0.000892 |
| KCNK5      | -0.520712752 | 0.031682  | -0.745400053 | 0.0020989 | -0.35247863  | 0.144825 |
| GFRA1      | 0.802577307  | 0.0317037 | 1.455976757  | 9.07E-05  | 1.27861542   | 0.000596 |
| BAG2       | -0.454775402 | 0.0317848 | -0.018386888 | 0.9296927 | -0.044764042 | 0.830331 |
| EID2B      | 1.078304763  | 0.0317646 | 0.738150815  | 0.1299119 | 0.379130006  | 0.44727  |
| KIF12      | -0.61122548  | 0.0317795 | -0.723648072 | 0.010946  | -0.62406712  | 0.028426 |
| NPC1       | 0.259942215  | 0.0317819 | 0.248688328  | 0.039752  | 0.395417042  | 0.001053 |
| PIF1       | -0.690302729 | 0.0318087 | -0.062815047 | 0.841211  | -0.233652096 | 0.462671 |
| SIMC1      | 0.26550562   | 0.0318047 | -0.055894718 | 0.6525654 | 0.068291596  | 0.58127  |

|            |              |           |              |           |              |          |
|------------|--------------|-----------|--------------|-----------|--------------|----------|
| SPOCD1     | 0.783674972  | 0.031808  | -0.016946979 | 0.9631206 | 0.296654781  | 0.417487 |
| THAP11     | -0.336421892 | 0.0318216 | -0.51641993  | 0.0009558 | -0.483564872 | 0.002037 |
| SKA2       | -0.314068411 | 0.0318985 | 0.144521292  | 0.320802  | 0.024626772  | 0.865935 |
| ESD        | -0.189354954 | 0.0319541 | -0.088047097 | 0.3149599 | -0.197193493 | 0.025016 |
| KLLN       | -0.418323556 | 0.0320287 | -0.176619307 | 0.3360781 | -0.513923642 | 0.008084 |
| KTN1       | -0.185940181 | 0.0320117 | -0.122344743 | 0.157524  | -0.005130055 | 0.952734 |
| P11-835E18 | -0.498230739 | 0.0320188 | -0.105530416 | 0.6280938 | -0.405815574 | 0.073115 |
| MEGF8      | -0.53026695  | 0.0321104 | 0.097582116  | 0.6930104 | -0.482768528 | 0.051018 |
| MRPS5      | -0.202745134 | 0.032109  | -0.103524714 | 0.2669825 | -0.045246324 | 0.628662 |
| PIK3R3     | -0.360350408 | 0.0321145 | -0.271256317 | 0.1065325 | -0.59122325  | 0.000445 |
| TMEM259    | 0.235176392  | 0.032176  | 0.062685954  | 0.568237  | 0.021183819  | 0.847164 |
| HAPLN4     | 0.99367012   | 0.0322137 | 0.806613009  | 0.078798  | -0.080135205 | 0.86636  |
| ZNF93      | -0.236498362 | 0.0322194 | -0.133774127 | 0.2193508 | -0.346099858 | 0.00172  |
| ASXL1      | -0.311733805 | 0.0322773 | -0.093503657 | 0.5199845 | -0.167384375 | 0.250094 |
| DHX8       | 0.170228954  | 0.0322986 | -0.00737497  | 0.9258802 | 0.126554723  | 0.109667 |
| MND1       | -0.494181536 | 0.0323918 | 0.245038687  | 0.2679871 | -0.147463962 | 0.511275 |
| EXPH5      | -0.482580558 | 0.0324372 | -0.521957475 | 0.02077   | 0.008787378  | 0.968823 |
| ANTXR2     | -0.313029314 | 0.0324662 | 0.007847175  | 0.9570997 | -0.581041868 | 7.49E-05 |
| POLR2H     | -0.250047117 | 0.0325297 | -0.064351943 | 0.5804963 | 0.055759491  | 0.631489 |
| ATF7IP2    | -0.345673563 | 0.0326114 | -0.592341852 | 0.0002515 | -0.278837779 | 0.084512 |
| STXBP4     | -0.366002836 | 0.0327048 | 0.176472553  | 0.2991692 | -0.453443624 | 0.008179 |
| BDKRB2     | 0.949437492  | 0.0327501 | 0.793128274  | 0.0743407 | 0.641529248  | 0.149634 |
| CDK9       | 0.305962173  | 0.0327629 | -0.264713983 | 0.0647852 | -0.166803868 | 0.244462 |
| TSG101     | 0.265888167  | 0.0327645 | 0.076357005  | 0.5395596 | 0.276503184  | 0.026093 |
| ZNF578     | -1.021077135 | 0.032767  | -0.920233942 | 0.0524792 | -0.181049954 | 0.701784 |
| BZW2       | 0.239666092  | 0.0328555 | 0.087443306  | 0.4358549 | 0.320096274  | 0.004292 |
| C1orf226   | -0.567203146 | 0.0328833 | -0.948331531 | 0.0004244 | -0.696971186 | 0.009162 |
| C3orf70    | 0.437482319  | 0.0328408 | 0.176052873  | 0.3907919 | 0.053882724  | 0.794304 |
| TMEM161B   | -0.23530858  | 0.0328749 | -0.206457987 | 0.0570765 | -0.127168249 | 0.241601 |
| TSPYL4     | 0.261262928  | 0.0328855 | -0.100914492 | 0.4123162 | -0.221877864 | 0.074363 |
| ZNF836     | -0.346846391 | 0.0328953 | -0.375099791 | 0.0190343 | -0.252812527 | 0.113167 |
| MRPL16     | -0.229636223 | 0.0329167 | -0.139758615 | 0.1885507 | -0.182296738 | 0.087767 |
| AC010620.1 | -0.283211868 | 0.0330162 | -0.324402163 | 0.0141918 | -0.31114859  | 0.018869 |
| GNAQ       | 0.225424095  | 0.0330267 | 0.098824401  | 0.3492913 | 0.475335867  | 6.56E-06 |
| NLGN4X     | 0.536101485  | 0.0330309 | 0.076605167  | 0.7614295 | 0.183607137  | 0.466427 |
| BBS7       | -0.467236603 | 0.0330832 | -0.175389499 | 0.420364  | -0.227323188 | 0.299259 |
| ARHGAP42   | 0.222611321  | 0.0331717 | 0.109565961  | 0.2945126 | 0.579528477  | 2.58E-08 |
| BUB1       | -0.390748463 | 0.0332019 | -0.042048429 | 0.8177815 | -0.273695975 | 0.134676 |
| FAIM       | -0.39307656  | 0.0331908 | 0.01288366   | 0.9429517 | 0.079234547  | 0.658695 |
| PXDC1      | 0.293428214  | 0.0332669 | 0.328997374  | 0.0165221 | 0.430985596  | 0.001685 |
| ATP5D      | 0.768805667  | 0.0333889 | 0.218839512  | 0.546901  | 0.673223206  | 0.063156 |
| PITX2      | -0.902551595 | 0.0334769 | -0.891988398 | 0.0353719 | -1.898833339 | 1.04E-05 |
| SH3PXD2A   | 0.282685318  | 0.0334869 | -0.104154871 | 0.4337333 | -0.00125482  | 0.992479 |
| C11orf95   | -0.303709172 | 0.0335413 | -0.453293883 | 0.0014938 | -0.732826963 | 3.27E-07 |
| MRPS10     | -0.190264419 | 0.0335327 | 0.018937087  | 0.8289257 | -0.018437537 | 0.834317 |
| ABT1       | -0.191554107 | 0.0337592 | -0.238963351 | 0.0075748 | -0.165925479 | 0.06397  |
| GSTP1      | 0.209214838  | 0.0337446 | -0.039818083 | 0.6861244 | 0.320615237  | 0.001129 |

|            |              |           |              |           |              |          |
|------------|--------------|-----------|--------------|-----------|--------------|----------|
| PARVA      | 0.274588697  | 0.0337417 | 0.217205738  | 0.091959  | 0.060258168  | 0.641007 |
| SIX5       | 0.645202166  | 0.0337567 | 0.333116587  | 0.2747242 | 0.422795387  | 0.165428 |
| TD-2328D6  | 1.10791064   | 0.033805  | 0.162565241  | 0.7558222 | 0.665171526  | 0.202814 |
| SLC39A8    | -0.636591893 | 0.0337924 | 0.032314509  | 0.9118675 | 0.2560047    | 0.384537 |
| ARNTL      | -0.528072255 | 0.0338924 | -0.632299586 | 0.0109671 | -0.203006017 | 0.41206  |
| PPIL4      | -0.172895119 | 0.033902  | 0.028082794  | 0.7258714 | 0.034895326  | 0.664116 |
| ART5       | 0.995234575  | 0.0339473 | 0.635046211  | 0.1780982 | 0.195610093  | 0.683274 |
| PTPN2      | 0.223992419  | 0.0339353 | 0.35266092   | 0.0007607 | 0.554135219  | 1.17E-07 |
| TMED9      | 0.236435242  | 0.0340252 | -0.136124709 | 0.2230557 | 0.037328033  | 0.737948 |
| TP53TG5    | 0.759504449  | 0.0340516 | 0.439750275  | 0.2201626 | 0.753616654  | 0.034287 |
| VMA21      | -0.180714669 | 0.0340854 | -0.115818626 | 0.1715342 | -0.23622241  | 0.005488 |
| C15orf48   | 0.796017166  | 0.0341614 | 1.001363135  | 0.0073973 | 1.938462118  | 1.81E-07 |
| SHROOM2    | 0.502382403  | 0.0341969 | 0.441615589  | 0.0614264 | 0.33253577   | 0.160929 |
| TRIQQ      | -0.342218675 | 0.0341949 | -0.290998    | 0.0710898 | -0.030583189 | 0.849502 |
| C21orf2    | 0.26398645   | 0.0342705 | -0.044051544 | 0.7260671 | 0.29216885   | 0.019255 |
| ZNF692     | -0.358757946 | 0.0342819 | -0.55363722  | 0.0010803 | -0.488824724 | 0.003905 |
| ENDOD1     | -0.269702367 | 0.0343072 | -0.117529761 | 0.3525805 | -0.177722601 | 0.161038 |
| SAE1       | -0.218591717 | 0.0343197 | -0.021922736 | 0.8311329 | -0.053592043 | 0.602591 |
| ITGB1BP2   | -0.898902411 | 0.0344493 | -0.265266562 | 0.4921621 | -0.34412932  | 0.379563 |
| C8orf48    | -0.621441406 | 0.0345052 | -0.437794205 | 0.123958  | -0.695781302 | 0.017318 |
| ZNF708     | -0.236837549 | 0.0345417 | -0.182980178 | 0.0997059 | -0.413510757 | 0.000228 |
| C4A        | 0.938877604  | 0.0346201 | 0.147237228  | 0.7430565 | 0.664951886  | 0.132978 |
| CABIN1     | -0.321573151 | 0.0346186 | -0.413248784 | 0.0066042 | -0.362687183 | 0.017169 |
| KCNJ6      | 0.601356349  | 0.0345926 | 0.813462895  | 0.0036644 | 0.334316693  | 0.242666 |
| PIM1       | 0.67118045   | 0.0346253 | 0.442028851  | 0.1641145 | 1.214105796  | 0.000125 |
| ZNF304     | -0.250224786 | 0.034578  | -0.271945854 | 0.0202944 | -0.344816037 | 0.00351  |
| ZSCAN9     | -0.348349542 | 0.0346487 | -0.028301134 | 0.8598212 | -0.108831039 | 0.500603 |
| PPME1      | 0.271312377  | 0.0347087 | -0.156858927 | 0.2244237 | -0.093525756 | 0.469147 |
| DUS4L      | -0.375401418 | 0.0347701 | -0.104688642 | 0.5403562 | -0.062170145 | 0.717227 |
| NOLC1      | 0.373079613  | 0.0347606 | 0.51425402   | 0.0035901 | 0.612933545  | 0.000518 |
| GXYLT1     | -0.258108936 | 0.0348174 | -0.193365029 | 0.1127842 | -0.361091785 | 0.003157 |
| SEMA4B     | 0.470499095  | 0.0348332 | 0.454490474  | 0.0413886 | 0.764319036  | 0.000598 |
| ZNF681     | -0.402587511 | 0.0348369 | -0.482803016 | 0.0107506 | -0.438422231 | 0.020857 |
| ZNF714     | -0.682778309 | 0.0348074 | -0.22718621  | 0.4593921 | -0.694084901 | 0.029913 |
| PRKRIP1    | -0.303892685 | 0.0349084 | -0.158516176 | 0.2664812 | -0.230053983 | 0.109828 |
| ZNF468     | -0.382875121 | 0.0349022 | -0.29458968  | 0.1041051 | -0.303109364 | 0.094515 |
| KIF3A      | -0.351436791 | 0.0349299 | -0.385392659 | 0.0197551 | -0.436072753 | 0.008876 |
| RAB8A      | -0.312792931 | 0.0349657 | -0.162898124 | 0.2711993 | -0.137308276 | 0.353768 |
| P11-460N11 | 0.854327055  | 0.0349934 | 1.247451298  | 0.0017933 | 0.698014415  | 0.08507  |
| S1PR2      | 0.573325892  | 0.0352252 | 0.302338709  | 0.2669324 | -0.024035046 | 0.92998  |
| ZNF90      | -0.380150748 | 0.0352213 | -0.421573137 | 0.0184691 | -0.375035243 | 0.035929 |
| DNAL4      | -0.309954478 | 0.0352555 | -0.389459169 | 0.0075916 | -0.271061459 | 0.062926 |
| RBM7       | 0.264317265  | 0.0352525 | 0.097336438  | 0.4371755 | 0.276168551  | 0.027384 |
| LGALS9     | 0.625734763  | 0.0352807 | 0.041293658  | 0.8899746 | 0.763139993  | 0.009988 |
| WDR3       | -0.326294349 | 0.0352969 | 0.005768486  | 0.970222  | 0.020364274  | 0.895248 |
| PAR6B      | 0.309101261  | 0.0353218 | 0.205613818  | 0.1608556 | 0.425723122  | 0.003653 |
| FZD6       | 0.353928669  | 0.0353788 | 0.191885853  | 0.2532719 | 0.583339399  | 0.000496 |

|            |              |           |              |           |              |          |
|------------|--------------|-----------|--------------|-----------|--------------|----------|
| YWHAG      | 0.162390286  | 0.0353807 | 0.125010914  | 0.1047487 | 0.202881897  | 0.008478 |
| EEF1A1P12  | 0.383692815  | 0.0355234 | 0.368321034  | 0.0408435 | 0.437052657  | 0.015403 |
| RNF219     | -0.294974359 | 0.035545  | -0.271742454 | 0.0522324 | -0.273616396 | 0.050827 |
| VPS33A     | -0.294238129 | 0.0355359 | -0.089352365 | 0.5188319 | -0.084975155 | 0.541658 |
| ACTG1      | 0.300918597  | 0.035617  | 0.03920443   | 0.7842717 | 0.239205721  | 0.094822 |
| HDGFRP3    | -0.245999973 | 0.0356138 | 0.201829968  | 0.0828216 | 0.04645989   | 0.6904   |
| LAMA5      | -0.401736393 | 0.0355961 | -0.571667285 | 0.0027991 | -0.452694297 | 0.017918 |
| MRPL51     | -0.213972533 | 0.0355926 | -0.021002606 | 0.8342828 | -0.021714155 | 0.829211 |
| BCKDHA     | -0.874013509 | 0.0356996 | -0.153430152 | 0.7033376 | 0.425757775  | 0.289565 |
| HOXB9      | -1.597640659 | 0.0357314 | -1.236299411 | 0.10171   | -3.522176185 | 1.02E-05 |
| CBX2       | -0.394194552 | 0.035796  | -0.347917214 | 0.0619964 | -0.488562637 | 0.009104 |
| PSMG2      | -0.176581637 | 0.0357955 | 0.027526106  | 0.736934  | -0.02187172  | 0.790918 |
| DZIP1L     | 0.439778483  | 0.0358109 | 0.237347504  | 0.2563258 | 0.18888942   | 0.367803 |
| OLR1       | 0.742044742  | 0.0358863 | 0.517898542  | 0.1427964 | 0.471107275  | 0.182982 |
| ECT2       | 0.334315768  | 0.0359327 | 0.377224791  | 0.0178281 | 0.500474166  | 0.001666 |
| ALDH3A2    | -0.365754283 | 0.0359821 | -0.139133364 | 0.4237085 | -0.327455385 | 0.059911 |
| CTSV       | -0.369192883 | 0.0359926 | -0.192318912 | 0.2677371 | -0.072991132 | 0.673947 |
| P11-570P14 | -1.199764802 | 0.0360069 | 0.086936173  | 0.8702315 | -0.034163362 | 0.949157 |
| P11-38O23  | -0.934268326 | 0.0360742 | -0.214562084 | 0.6037863 | -1.088167124 | 0.014793 |
| DDX26B     | 0.268971809  | 0.0362296 | 0.232367788  | 0.0698408 | 0.208937887  | 0.104534 |
| FABP5P7    | -0.471610773 | 0.0362123 | -0.131206539 | 0.5579156 | -0.011798561 | 0.957972 |
| KCTD2      | -0.299939271 | 0.0362517 | -0.330959925 | 0.020588  | -0.287267985 | 0.04465  |
| MGRN1      | 0.358391283  | 0.0362444 | 0.077824485  | 0.6498559 | 0.182301408  | 0.287144 |
| PURA       | -0.265345423 | 0.036251  | -0.564543907 | 7.11E-06  | -0.500288967 | 7.41E-05 |
| RAP1GDS1   | -0.230429242 | 0.0361944 | -0.197513682 | 0.0705757 | -0.051262648 | 0.637806 |
| ARF6       | -0.194048934 | 0.0363259 | -0.216766811 | 0.0189777 | -0.111309202 | 0.228282 |
| CNNM1      | -0.601962969 | 0.0363266 | -0.346158534 | 0.2242386 | -0.389332197 | 0.172532 |
| DNTTIP1    | 0.244221885  | 0.0363251 | 0.148060608  | 0.1996475 | 0.370175987  | 0.001263 |
| PYGL       | -0.319649334 | 0.0362936 | 0.077554163  | 0.6075223 | -0.011717139 | 0.938298 |
| TARSL2     | -0.314017543 | 0.0362959 | -0.156873162 | 0.2925462 | -0.061985304 | 0.677286 |
| P11-254B13 | 0.879636463  | 0.0363558 | 0.903980483  | 0.0291477 | 1.224039216  | 0.002838 |
| ST20       | -0.477119444 | 0.0363613 | -0.251815966 | 0.2588305 | -0.100540937 | 0.650598 |
| MRPS31     | -0.226678021 | 0.0363846 | -0.112838237 | 0.2874551 | -0.19723892  | 0.065553 |
| ST8SIA3    | -1.638451651 | 0.0364136 | 0.314670155  | 0.6829215 | -2.381768312 | 0.002966 |
| MRPL22     | -0.260763213 | 0.0364282 | -0.240763053 | 0.050658  | -0.253776637 | 0.041129 |
| ZBTB4      | -0.270155369 | 0.0364493 | -0.344360375 | 0.0073892 | -0.328761505 | 0.010728 |
| ACBD5      | -0.245569064 | 0.0366302 | -0.283191506 | 0.0156255 | -0.153495927 | 0.189229 |
| BBS12      | -0.459596724 | 0.0366046 | -0.174144851 | 0.4149177 | -0.089013302 | 0.67961  |
| GNB1       | 0.238495009  | 0.0366329 | 0.231399943  | 0.0424368 | 0.282158313  | 0.013362 |
| C1QTNF6    | 0.291383155  | 0.0366501 | -0.031700697 | 0.820777  | -0.05361904  | 0.705607 |
| B9D1       | 0.342939544  | 0.0367326 | -0.0655151   | 0.693415  | -0.145417077 | 0.386468 |
| BSDC1      | 0.235138181  | 0.0367184 | -0.044320618 | 0.6938391 | 0.108435119  | 0.334998 |
| IQSEC3     | 0.857705136  | 0.0367263 | -0.401223498 | 0.3441301 | 0.018975559  | 0.963175 |
| ITM2A      | 1.439791426  | 0.036705  | -0.183494234 | 0.7918441 | 2.433923516  | 0.000394 |
| TTC7A      | -0.380072646 | 0.0367238 | -0.143346761 | 0.4245676 | -0.165085265 | 0.35831  |
| CCDC157    | 0.414195366  | 0.0367747 | 0.059822361  | 0.7626471 | 0.419952167  | 0.032298 |
| HTR1B      | -0.945986836 | 0.0368054 | -0.991752149 | 0.0282018 | -1.059460406 | 0.019319 |

|            |              |           |              |           |              |          |
|------------|--------------|-----------|--------------|-----------|--------------|----------|
| GNAS       | 0.163926593  | 0.0368903 | 0.176272626  | 0.0247161 | 0.143349721  | 0.0679   |
| ENTPD4     | 0.24431233   | 0.0369557 | -0.112322747 | 0.3369979 | 0.126575596  | 0.27928  |
| FAM86EP    | -0.589471067 | 0.0369524 | -0.384054994 | 0.161258  | -0.781531072 | 0.005118 |
| INTS12     | -0.480556642 | 0.0370605 | 0.205794333  | 0.3545337 | -0.180223726 | 0.423895 |
| AC004381.6 | 0.566586431  | 0.0371138 | 0.732504584  | 0.0052996 | 0.641474541  | 0.015552 |
| DECR1      | -0.204011126 | 0.0371195 | 0.215307507  | 0.0252275 | 0.03758147   | 0.69746  |
| RAB21      | 0.224880068  | 0.0371215 | 0.165374533  | 0.1241645 | 0.386771861  | 0.000322 |
| VHL        | 0.2096988    | 0.0371778 | 0.15562706   | 0.1207138 | 0.211201776  | 0.035374 |
| TACO1      | -0.287788171 | 0.0371991 | -0.186954483 | 0.166194  | -0.452152337 | 0.001076 |
| ETFA       | -0.215751135 | 0.0372655 | -0.051835333 | 0.6145203 | -0.140397178 | 0.173296 |
| GLYCTK     | -0.425721693 | 0.0372467 | -0.492451219 | 0.0155778 | -0.490993732 | 0.015955 |
| IRGM       | 0.57079102   | 0.0372669 | 0.145146278  | 0.598991  | 0.1044719    | 0.708471 |
| KIAA1731   | -0.226884928 | 0.0373386 | -0.116251757 | 0.2826696 | -0.146518759 | 0.177088 |
| NOL11      | -0.220070491 | 0.0373624 | -0.112194608 | 0.2862803 | -0.119083682 | 0.258006 |
| RAC2       | 0.600810002  | 0.0373135 | 0.284366149  | 0.3253081 | 0.143557839  | 0.620667 |
| STK36      | 0.356398561  | 0.0373312 | 0.126457993  | 0.4594984 | -0.107472753 | 0.531753 |
| TOE1       | -0.438931039 | 0.0373542 | -0.465314969 | 0.0270977 | -0.615714042 | 0.003513 |
| C19orf26   | 0.880707501  | 0.0373939 | 0.496912266  | 0.243985  | 0.043979953  | 0.919722 |
| FAM208A    | -0.198244358 | 0.037452  | -0.249220378 | 0.008695  | -0.213854969 | 0.024512 |
| FXYD6      | 0.489578032  | 0.0374377 | 0.424828226  | 0.0709281 | -0.120053903 | 0.611842 |
| FBXL3      | -0.187840738 | 0.0374687 | -0.240789576 | 0.0073389 | -0.06303126  | 0.48217  |
| CAPG       | -0.250544945 | 0.0374917 | -0.191457721 | 0.1110518 | 0.191479902  | 0.109623 |
| CLDN1      | 0.555014558  | 0.0375211 | 0.403701244  | 0.1302429 | 0.574911071  | 0.031158 |
| CD70       | -1.369876204 | 0.0375419 | -1.520176037 | 0.0206784 | -0.885033627 | 0.170556 |
| PRRC2B     | 0.256338957  | 0.0375909 | -0.076844095 | 0.5329472 | -0.095357067 | 0.439656 |
| CCDC102A   | 0.535716002  | 0.0376357 | 0.421974272  | 0.0985631 | 0.349125187  | 0.174352 |
| CCDC12     | -0.23759969  | 0.0377101 | -0.367787687 | 0.0012316 | -0.320811795 | 0.004934 |
| PCF11      | -0.180724427 | 0.0377231 | -0.277275792 | 0.0013783 | -0.155120405 | 0.07341  |
| FXN        | 0.34616442   | 0.0377541 | 0.146600594  | 0.3745398 | 0.108392771  | 0.516074 |
| RHEB       | 0.15992578   | 0.0377584 | 0.364201827  | 1.53E-06  | 0.420832466  | 2.91E-08 |
| DDX18P1    | -0.838893013 | 0.0377933 | -0.594736972 | 0.1237887 | -0.70180092  | 0.074346 |
| EBF3       | 2.093786179  | 0.0378262 | 2.002791293  | 0.046788  | 3.15403857   | 0.001706 |
| GLUL       | -0.289978679 | 0.0378652 | -0.30127334  | 0.0309008 | -0.00189196  | 0.989182 |
| COG6       | -0.346273319 | 0.0379315 | -0.392233587 | 0.0186253 | -0.333559294 | 0.045311 |
| SLC35B4    | -0.289438774 | 0.0379245 | 0.012316152  | 0.9291796 | 0.044809768  | 0.747106 |
| ZNF207     | 0.157646374  | 0.0379874 | 0.162371189  | 0.0322642 | 0.262748324  | 0.000533 |
| ZNF669     | -0.250592457 | 0.0380178 | -0.265689377 | 0.0253647 | -0.440730795 | 0.00028  |
| ZNF592     | 0.180998982  | 0.0380403 | -0.07387211  | 0.3974427 | 0.017666151  | 0.839788 |
| INRNP2B    | 0.224098066  | 0.0380773 | -0.033250976 | 0.7583135 | -0.071859704 | 0.506262 |
| FAM105A    | -0.815701105 | 0.038111  | -0.441130472 | 0.2601172 | -0.650721677 | 0.097171 |
| GOLIM4     | -0.354812257 | 0.0381666 | 0.122259047  | 0.4736588 | -0.178267769 | 0.296914 |
| MRPL4      | 0.283695059  | 0.0381875 | 0.112353555  | 0.410921  | 0.110146139  | 0.421551 |
| NMUR2      | 0.706721556  | 0.038181  | 0.840921004  | 0.0129599 | 0.215655178  | 0.532379 |
| SLMAP      | 0.262420571  | 0.0381885 | 0.297429264  | 0.0186116 | 0.416503923  | 0.000976 |
| IFI6       | 0.626372529  | 0.0382384 | 1.096642843  | 0.0002579 | 1.136168997  | 0.000154 |
| NEK4       | -0.209292111 | 0.0382323 | 0.005455165  | 0.9564112 | -0.020495965 | 0.837944 |
| ADAMTS4    | 0.597162489  | 0.0383277 | 0.480328239  | 0.0931187 | 0.279244133  | 0.331448 |



|            |              |           |              |           |              |          |
|------------|--------------|-----------|--------------|-----------|--------------|----------|
| HNRNPK     | 0.142099427  | 0.0383253 | 0.030203235  | 0.6595828 | 0.114635173  | 0.094501 |
| IDH3A      | 0.242768452  | 0.0382943 | 0.317050833  | 0.0062482 | 0.451956527  | 9.48E-05 |
| MNS1       | -0.478703284 | 0.038326  | -0.142363584 | 0.5267806 | -0.283860445 | 0.208697 |
| NOG        | 0.696079337  | 0.0382907 | 0.509539173  | 0.1286568 | 0.555570026  | 0.098211 |
| ETV6       | 0.318611926  | 0.0383567 | 0.159714165  | 0.2992291 | 0.279468146  | 0.06909  |
| SMAP2      | -0.366691872 | 0.0383874 | -0.569571175 | 0.0013073 | -0.545445601 | 0.002078 |
| RPL26L1    | -0.240999867 | 0.0384071 | -0.009333301 | 0.9336571 | -0.068915605 | 0.543376 |
| FASTKD3    | -0.384412524 | 0.038491  | -0.332081267 | 0.0718265 | -0.549797219 | 0.003045 |
| VARS2      | 0.369010937  | 0.0384974 | 0.069809555  | 0.6957601 | -0.005090283 | 0.977329 |
| MAFB       | 1.594579027  | 0.038589  | 0.011470608  | 0.9882645 | 1.021288588  | 0.18638  |
| SMIM5      | -0.569588499 | 0.0385866 | -1.223918536 | 1.06E-05  | -0.390728835 | 0.152148 |
| TM4SF1     | 0.387114734  | 0.038598  | 0.317214346  | 0.0900387 | 0.737385235  | 8.10E-05 |
| TMEFF2     | 1.740815759  | 0.0385734 | 1.154505477  | 0.1663032 | 1.573188021  | 0.058831 |
| ZC3H11A    | 0.139059036  | 0.0385837 | -0.071547647 | 0.2867805 | -0.00572277  | 0.932133 |
| ZNF367     | -0.479124762 | 0.0385684 | -0.47154443  | 0.040787  | -0.357709008 | 0.12059  |
| ZGLP1      | 0.894367085  | 0.0386411 | 1.367896874  | 0.0009607 | 0.555419329  | 0.200557 |
| BAHD1      | -0.260112085 | 0.0386575 | -0.551694397 | 1.16E-05  | -0.431908359 | 0.000598 |
| BCL7A      | -0.294197327 | 0.038687  | -0.024117001 | 0.8607865 | -0.375867135 | 0.008932 |
| P11-139H15 | -0.418450353 | 0.0387085 | -0.14191705  | 0.4638046 | -0.120109852 | 0.537578 |
| ATG7       | 0.345372554  | 0.0387538 | 0.538337698  | 0.0012126 | 0.374053508  | 0.024533 |
| P17-C18orf | -0.333860112 | 0.0387622 | -0.141693928 | 0.3784879 | -0.042304862 | 0.792581 |
| ZNF684     | -0.5229873   | 0.0387428 | -0.4442232   | 0.0730711 | -0.267892688 | 0.282139 |
| PBDC1      | 0.289537865  | 0.0388758 | -0.05423729  | 0.6994431 | 0.337124697  | 0.015796 |
| SMIM7      | -0.173163686 | 0.0390553 | -0.103165337 | 0.2152208 | 0.083087238  | 0.318549 |
| UBR4       | 0.275316355  | 0.0390889 | 0.08117363   | 0.5427865 | 0.251419762  | 0.059539 |
| MSANTD2    | -0.295055946 | 0.0391851 | -0.057609444 | 0.6817707 | -0.080041999 | 0.570803 |
| PRPF4B     | -0.187299924 | 0.0391725 | -0.259751913 | 0.0041693 | -0.172717793 | 0.056803 |
| PRRC2A     | 0.252947326  | 0.0391909 | 0.249657952  | 0.0417508 | 0.105433566  | 0.390282 |
| KBTBD2     | 0.234136678  | 0.0392386 | 0.108305372  | 0.3391958 | 0.280456705  | 0.013164 |
| RBBP5      | -0.176162682 | 0.0392177 | -0.160388994 | 0.0561978 | -0.230401368 | 0.006673 |
| RGMA       | 0.609899487  | 0.0392394 | 0.159169621  | 0.5908825 | 0.056558887  | 0.848707 |
| AC000367.1 | -0.60607375  | 0.0392576 | 0.233251606  | 0.3915189 | 0.150751441  | 0.58346  |
| DCTN4      | -0.180246716 | 0.0392926 | -0.027093155 | 0.7556407 | -0.281624698 | 0.001284 |
| PXMP2      | -0.381841522 | 0.0393268 | -0.056500017 | 0.7551847 | -0.196631807 | 0.280305 |
| ABCA9      | 0.776471127  | 0.0393941 | 0.822454651  | 0.0279927 | 0.633194626  | 0.091128 |
| HLA-E      | 0.287108576  | 0.0394023 | 0.137853106  | 0.3223679 | 0.366713405  | 0.008416 |
| PPFIA1     | 0.234751393  | 0.0394002 | 0.2269591    | 0.0454391 | 0.314309843  | 0.005623 |
| WBP2       | 0.376062023  | 0.0394193 | -0.027370557 | 0.8811214 | 0.262496144  | 0.15051  |
| MEN1       | 0.218999143  | 0.039469  | -0.135299703 | 0.2031221 | -0.237540338 | 0.027086 |
| RFXAP      | -0.585881647 | 0.0395771 | -0.693432092 | 0.0144227 | -0.413874499 | 0.143041 |
| RNPEP      | 0.246244394  | 0.0395673 | -0.122724752 | 0.3066239 | 0.132725667  | 0.266732 |
| CDKN3      | -0.42657923  | 0.0396549 | -0.049469025 | 0.8088545 | -0.096998889 | 0.636278 |
| LPIN2      | 0.247135297  | 0.0396816 | -0.078702213 | 0.5127662 | 0.065042335  | 0.58866  |
| FBXL15     | -0.474528526 | 0.0396976 | -0.412655712 | 0.0699981 | -0.421433528 | 0.063272 |
| LIN7C      | -0.189231031 | 0.0397393 | -0.161801445 | 0.0776687 | -0.021043308 | 0.818418 |
| SLC10A5    | -0.683900251 | 0.0397324 | -0.527157344 | 0.0981502 | -0.374399006 | 0.237664 |
| MAPRE1     | 0.215927766  | 0.0397777 | 0.17964512   | 0.0863517 | 0.294804311  | 0.004879 |

|           |              |           |              |           |              |          |
|-----------|--------------|-----------|--------------|-----------|--------------|----------|
| RPLP0P6   | -1.091825807 | 0.0398732 | -0.749110212 | 0.144833  | -1.299853963 | 0.014889 |
| CCNJL     | -0.394606859 | 0.0399507 | -0.373583051 | 0.0502416 | -0.733610845 | 0.000145 |
| PRTG      | -0.651193689 | 0.0399696 | -0.100897137 | 0.7495307 | -0.563433535 | 0.075592 |
| BOLA2B    | -0.340425354 | 0.0399956 | -0.217104541 | 0.1854537 | 0.126517261  | 0.437722 |
| CARD6     | 0.265566492  | 0.0400252 | -0.08543606  | 0.5109964 | 0.278570472  | 0.030441 |
| AP3S1     | -0.19428375  | 0.0400798 | -8.35E-05    | 0.9992887 | 0.089468021  | 0.339007 |
| ZNF557    | -0.213979706 | 0.0400848 | -0.19776424  | 0.054954  | -0.402241793 | 0.000118 |
| PCDH17    | -0.515903857 | 0.0401448 | -0.476981498 | 0.0569169 | -0.580777169 | 0.02072  |
| TWISTNB   | 0.316507114  | 0.0401418 | 0.117196143  | 0.4464137 | 0.43533895   | 0.004636 |
| RANBP1    | -0.24477004  | 0.0402138 | 0.078383592  | 0.5083014 | 0.061138732  | 0.606338 |
| RAD52     | -0.501687967 | 0.0403124 | -0.117004734 | 0.6292037 | -0.510483968 | 0.038645 |
| SIK2      | 0.352424013  | 0.0403383 | 0.377596451  | 0.0280115 | 0.453990541  | 0.008254 |
| SLC41A2   | 0.35357145   | 0.0403381 | 0.236895537  | 0.1689366 | 1.002436098  | 5.08E-09 |
| TBC1D2    | -0.438301928 | 0.0402956 | -0.458927733 | 0.0301309 | -0.258040904 | 0.2213   |
| ZNF292    | -0.284355438 | 0.040284  | 0.004801979  | 0.9723136 | 0.095162535  | 0.49168  |
| ILK       | 0.239879662  | 0.0403913 | 0.045491608  | 0.6972826 | 0.167709131  | 0.151672 |
| SSBP4     | 0.373793437  | 0.0403869 | 0.198319225  | 0.2765366 | 0.162961139  | 0.371469 |
| YME1L1    | 0.159649386  | 0.0403908 | 0.064011108  | 0.4100235 | 0.20095795   | 0.009685 |
| FGFR1     | 0.505988683  | 0.0404072 | 0.549407388  | 0.0259145 | 0.214501922  | 0.385306 |
| HIST1H4A  | -0.43781599  | 0.0404392 | -0.291837076 | 0.1715463 | -0.20382375  | 0.33963  |
| AKT1S1    | 0.240882919  | 0.0405147 | -0.091826599 | 0.4349743 | -0.050906622 | 0.666787 |
| EBAG9     | -0.298872608 | 0.0405252 | -0.117260985 | 0.413743  | -0.168136518 | 0.242912 |
| NIPAL2    | -0.369479999 | 0.0406408 | 0.055823007  | 0.75409   | 0.355339339  | 0.045912 |
| C17orf107 | 0.747806337  | 0.0406903 | 0.544643763  | 0.1343321 | 0.705410723  | 0.055433 |
| DPY30     | -0.227672103 | 0.0406893 | -0.314884943 | 0.0044279 | -0.303182872 | 0.006416 |
| ACADM     | -0.188262004 | 0.040794  | 0.066434976  | 0.4641071 | 0.112524144  | 0.215605 |
| MLH3      | -0.205502207 | 0.0408024 | 0.025317663  | 0.797937  | -0.21054613  | 0.035178 |
| TMEM200A  | -2.240807355 | 0.040784  | 2.599827775  | 0.004528  | 1.243978839  | 0.178626 |
| TMEM11    | 0.264270881  | 0.0408405 | -0.055231494 | 0.6696248 | 0.047757391  | 0.712073 |
| CDCA2     | -0.487430823 | 0.0409167 | -0.119177166 | 0.6152561 | -0.429751536 | 0.070739 |
| GTPBP1    | 0.310958945  | 0.0409282 | -0.02907268  | 0.8483322 | 0.315614554  | 0.03805  |
| MTERFD2   | -0.323451772 | 0.0409763 | -0.083717093 | 0.5928454 | -0.379778517 | 0.016082 |
| SERINC2   | 0.280205913  | 0.0410025 | -0.134026447 | 0.3294603 | 0.276529078  | 0.043447 |
| DCTPP1    | 0.350321256  | 0.0411236 | 0.280292865  | 0.1014085 | 0.519695534  | 0.002308 |
| STC1      | 0.863758175  | 0.0411091 | 0.724773407  | 0.0865455 | 0.492248367  | 0.245308 |
| AKTIP     | -0.300119336 | 0.0411525 | -0.346909395 | 0.0168985 | -0.248837868 | 0.086101 |
| UBAP1     | 0.245016262  | 0.0411658 | -0.07288747  | 0.5441435 | 0.125904472  | 0.29387  |
| UBR3      | -0.273934614 | 0.0412742 | 0.044885392  | 0.7369886 | 0.042491179  | 0.750797 |
| ANO8      | 0.393513556  | 0.0413329 | 0.056305977  | 0.770356  | -0.105412225 | 0.587443 |
| SMAD4     | 0.192765732  | 0.0414101 | 0.039313184  | 0.6768121 | 0.283342007  | 0.002669 |
| CDS1      | -0.303215322 | 0.0414346 | -0.428394607 | 0.0039377 | -0.109010422 | 0.462601 |
| INSIG1    | 0.331187218  | 0.0415305 | 0.111958599  | 0.4907811 | 0.379112567  | 0.019605 |
| GREM1     | 0.808238017  | 0.0417384 | -0.11201323  | 0.7784544 | 0.640911341  | 0.106581 |
| MED14     | 0.363652466  | 0.041896  | 0.023481301  | 0.8955011 | 0.072904743  | 0.683131 |
| RARS2     | -0.192979125 | 0.0418891 | -0.13869638  | 0.1402237 | -0.017958215 | 0.848469 |
| MCMBP     | -0.166621996 | 0.0419791 | -0.133369246 | 0.1017302 | 0.043261831  | 0.595214 |
| MFAP4     | 0.431857507  | 0.0419551 | 0.278097585  | 0.1903309 | -0.137715279 | 0.517508 |

|            |              |           |              |           |              |          |
|------------|--------------|-----------|--------------|-----------|--------------|----------|
| ONECUT1    | -0.885037    | 0.0419853 | -1.335123313 | 0.0022369 | -0.727766113 | 0.09383  |
| ZNF665     | -0.39226118  | 0.0419391 | 0.070932297  | 0.7062131 | -0.104180709 | 0.585592 |
| ARHGAP33   | 0.882509289  | 0.0420418 | 0.028273797  | 0.9487907 | 0.684674159  | 0.117556 |
| SLC25A16   | 0.447359065  | 0.0420545 | 0.432788868  | 0.0487683 | 0.516413852  | 0.018671 |
| DPP9       | 0.384623763  | 0.0421754 | 0.311637957  | 0.099428  | 0.131870745  | 0.486522 |
| MEGF10     | 1.521056874  | 0.0421836 | 1.393096932  | 0.0624576 | 1.527685391  | 0.040778 |
| TMEM261    | -0.21083775  | 0.042175  | 0.013944216  | 0.8915764 | 0.102682038  | 0.316211 |
| P11-641D5  | -0.261893124 | 0.0422188 | -0.185940622 | 0.1487784 | -0.141782325 | 0.270994 |
| OSGEPL1    | -0.337869784 | 0.0422379 | -0.347784072 | 0.0334323 | -0.394493162 | 0.017102 |
| PIK3CD     | 1.175130176  | 0.0424051 | 1.530043626  | 0.0085969 | 0.98723302   | 0.088774 |
| SCAF8      | -0.120891776 | 0.04239   | -0.175335881 | 0.003083  | -0.226827512 | 0.000136 |
| MPC1       | -0.237269688 | 0.0424778 | -0.025093881 | 0.824891  | 0.059735928  | 0.598808 |
| SIRT2      | 0.244254211  | 0.0424867 | 0.030078752  | 0.8025839 | -0.058553236 | 0.62798  |
| LEPREL1    | -0.555707296 | 0.0425177 | -0.322169595 | 0.2387768 | -0.037830774 | 0.889986 |
| ELP4       | -0.215563137 | 0.0426516 | -0.186448701 | 0.071576  | -0.130003489 | 0.212767 |
| MBD4       | -0.246975631 | 0.0426489 | -0.376949886 | 0.0019334 | -0.118509869 | 0.328466 |
| PAX5       | 1.198355141  | 0.0426871 | 1.743509179  | 0.0022749 | 0.889380438  | 0.129734 |
| SGSM1      | -1.387809783 | 0.0427053 | -0.694028233 | 0.3020957 | 0.283039116  | 0.672014 |
| COQ3       | -0.471139248 | 0.0427313 | 0.091366803  | 0.6790962 | -0.081054279 | 0.719365 |
| PDE7B      | 1.419826242  | 0.0427584 | 1.040130241  | 0.1406563 | 1.354745753  | 0.055462 |
| MRE11A     | -0.223628349 | 0.0428106 | -0.16758468  | 0.1255864 | -0.327578689 | 0.002924 |
| CCRL2      | 0.890933973  | 0.042858  | 0.92302063   | 0.0348609 | 0.265634612  | 0.550681 |
| CNOT7      | -0.241184854 | 0.0428425 | -0.043746203 | 0.7126915 | -0.179634134 | 0.130866 |
| P11-459D22 | -0.96901497  | 0.0429374 | -0.413752733 | 0.3427206 | 0.242948298  | 0.559129 |
| TB-147C22  | 0.893440097  | 0.0430578 | 0.169365929  | 0.7080658 | 0.787780918  | 0.074013 |
| DDX11      | -0.282996588 | 0.0430185 | -0.485173829 | 0.0005199 | -0.48095063  | 0.000597 |
| ELAC2      | -0.23711401  | 0.043043  | -0.198494975 | 0.0891704 | -0.138181421 | 0.236485 |
| ENPP4      | -0.394272625 | 0.0430361 | -0.437457801 | 0.0243534 | -0.160096764 | 0.408846 |
| POM121     | 0.767703027  | 0.0430288 | 0.692840767  | 0.0678728 | 0.192982407  | 0.611822 |
| PMPCB      | -0.196047466 | 0.0431324 | 0.010077253  | 0.9163551 | 0.015465148  | 0.872302 |
| SUPT7L     | 0.193745401  | 0.0431243 | 0.059121979  | 0.5353888 | -0.013127349 | 0.891147 |
| CYB5R3     | 0.306890546  | 0.0431571 | -0.062606398 | 0.6802791 | -0.0461326   | 0.761591 |
| FAM86DP    | -0.375926512 | 0.0432088 | -0.245175635 | 0.1817777 | -0.577019635 | 0.001936 |
| SLC39A7    | 0.44367071   | 0.0432098 | -0.057553643 | 0.7933555 | 0.293705115  | 0.180523 |
| SNRPA1     | 0.234551656  | 0.0432031 | 0.017489661  | 0.8800359 | 0.206275605  | 0.074058 |
| ZDHHC3     | 0.210517867  | 0.0432392 | 0.005768548  | 0.9556722 | 0.213616352  | 0.039247 |
| NSUN5P2    | -0.820864399 | 0.0432682 | -0.71101581  | 0.076966  | -0.997495197 | 0.013976 |
| TMBIM6     | 0.185514679  | 0.0433183 | -0.011168101 | 0.9031879 | 0.324013095  | 0.000415 |
| NPM1P25    | 0.621513241  | 0.0434081 | 0.180972188  | 0.5613401 | 0.549745717  | 0.072906 |
| HHEX       | -0.878911005 | 0.0435233 | 0.465336572  | 0.2799112 | -1.091442623 | 0.012168 |
| CBR3       | 0.934734825  | 0.0435405 | 0.865031335  | 0.0594227 | 0.892399193  | 0.052686 |
| RALGAPA1F  | -0.754277294 | 0.0435959 | -0.300640232 | 0.4081303 | -0.376000512 | 0.303747 |
| AC098826.5 | 0.901385671  | 0.0436178 | 1.169503989  | 0.008111  | 0.587766568  | 0.190346 |
| CCDC84     | -0.417409755 | 0.043665  | 0.020948103  | 0.9153366 | -0.319688292 | 0.114646 |
| NIT1       | 0.223564649  | 0.0436574 | -0.055817887 | 0.6137276 | 0.135666894  | 0.21778  |
| ADAT2      | -0.384176059 | 0.0437357 | -0.229616569 | 0.2189633 | -0.24426352  | 0.194634 |
| SPRED1     | 0.28126576   | 0.0437863 | 0.260172591  | 0.0617244 | 0.138016037  | 0.321955 |

|            |              |           |              |           |              |          |
|------------|--------------|-----------|--------------|-----------|--------------|----------|
| UBALD2     | 0.576189606  | 0.0438224 | 0.360115424  | 0.2078125 | 0.699070917  | 0.0141   |
| CCDC142    | -0.492221648 | 0.0438388 | -0.270458852 | 0.2630992 | -0.50673098  | 0.038441 |
| GPRC5A     | 0.514660863  | 0.0438774 | 0.214133101  | 0.4017584 | 0.297012916  | 0.244865 |
| ADRA2A     | -0.73391469  | 0.0441191 | -1.628950469 | 1.13E-05  | -0.553349274 | 0.126736 |
| C16orf62   | -0.211240258 | 0.0441121 | -0.253275443 | 0.0155056 | -0.185797856 | 0.076157 |
| IGLON5     | 0.512489263  | 0.044104  | 0.368059649  | 0.1472632 | -0.376717728 | 0.148969 |
| CHD6       | -0.278995975 | 0.0441789 | -0.142196983 | 0.3051414 | -0.175874639 | 0.204759 |
| PNPO       | -0.406722146 | 0.0441634 | -0.01532167  | 0.9383224 | -0.317211369 | 0.114678 |
| APBA3      | 0.363950534  | 0.0442539 | 0.192571041  | 0.2821493 | 0.195395169  | 0.278213 |
| FGA        | -1.394838157 | 0.0442526 | -0.077819013 | 0.909966  | -2.160545365 | 0.001942 |
| BTF3L4P2   | 0.317938631  | 0.0443168 | -0.147349368 | 0.3562031 | 0.10052541   | 0.526218 |
| OGFOD2     | -0.278468543 | 0.04431   | -0.542323924 | 8.68E-05  | -0.574120501 | 4.81E-05 |
| LIG1       | -0.279246088 | 0.0443349 | -0.116590345 | 0.4005043 | -0.166899311 | 0.228114 |
| CSTF2T     | -0.192978439 | 0.0443893 | -0.236065145 | 0.0134156 | -0.318138492 | 0.000913 |
| C3orf52    | 0.239086463  | 0.0444541 | -0.02903929  | 0.8071306 | 0.483015925  | 3.86E-05 |
| TD-2287O1E | -0.357570047 | 0.0444528 | -0.442874181 | 0.0127116 | -0.392155421 | 0.027401 |
| FAHD2A     | 0.338350076  | 0.0444427 | 0.092558422  | 0.5826203 | 0.353678234  | 0.035597 |
| ARHGEF34F  | 0.329966829  | 0.0445838 | -0.118649979 | 0.4709753 | 0.168472783  | 0.30519  |
| EIF5B      | 0.468659646  | 0.0446343 | 0.163263488  | 0.4843398 | -0.042348331 | 0.856347 |
| PCDP1      | -0.595293705 | 0.0446499 | 0.509961955  | 0.0708971 | -0.240295372 | 0.402787 |
| RANGRF     | -0.305738732 | 0.0447332 | -0.101366167 | 0.4923824 | -0.087931846 | 0.552109 |
| S100A6     | -0.31324682  | 0.044725  | -0.213305422 | 0.1715174 | 0.050509009  | 0.746069 |
| SIKE1      | -0.193936395 | 0.0447262 | -0.143648045 | 0.134904  | -0.136024618 | 0.157566 |
| UBE2L6     | 0.445875009  | 0.0447237 | 0.402845256  | 0.0685872 | 0.460766563  | 0.037519 |
| TMEM5      | -0.249486433 | 0.0447675 | -0.275322828 | 0.0244274 | -0.123868277 | 0.310553 |
| ZNF544     | -0.2160008   | 0.0447529 | -0.290539781 | 0.0064987 | -0.351674948 | 0.00104  |
| DAZAP2     | 0.243425305  | 0.0448233 | -0.159110138 | 0.1898338 | 0.209164631  | 0.084368 |
| HDAC11     | -0.402536106 | 0.0448091 | -0.480246376 | 0.0156639 | -0.422132317 | 0.034755 |
| HECTD3     | -0.288510657 | 0.0449013 | -0.156748094 | 0.2721332 | -0.485993223 | 0.000752 |
| NAT6       | 0.477545696  | 0.0448942 | 0.382427128  | 0.1059516 | 0.322296706  | 0.174716 |
| PIN4       | -0.336642065 | 0.0449321 | 0.092770997  | 0.5732951 | 0.030595885  | 0.853535 |
| DACT3      | 0.419826387  | 0.044984  | 0.56628558   | 0.0065536 | 0.178749526  | 0.393946 |
| RTN2       | 0.51539915   | 0.0449698 | 0.553273972  | 0.029249  | 0.502323904  | 0.049969 |
| ZNF77      | -0.3130084   | 0.0449597 | -0.571376299 | 0.0002677 | -0.56197778  | 0.000369 |
| TIMP2      | 0.36546508   | 0.0450165 | 0.364541789  | 0.0452049 | 0.143655753  | 0.43102  |
| DDX47      | 0.176150562  | 0.0450598 | 0.10010174   | 0.2529383 | 0.292372531  | 0.000817 |
| LACTB2     | -0.365515445 | 0.0451214 | 0.172523776  | 0.3351706 | -0.006743996 | 0.970078 |
| BRINP3     | 0.969911751  | 0.0451493 | 0.340610086  | 0.4831195 | 0.376516389  | 0.437907 |
| AC242988.1 | -0.372278342 | 0.0452046 | -0.2884809   | 0.1185892 | -0.155350633 | 0.40038  |
| EIF2AK1    | 0.186190657  | 0.0452205 | -0.189828803 | 0.0410302 | 0.008437919  | 0.927545 |
| KLC4       | -0.330238133 | 0.0451763 | -0.36616574  | 0.0260565 | -0.281371793 | 0.086974 |
| ZHX3       | -0.30066694  | 0.0452202 | 0.092362971  | 0.5332573 | -0.088742267 | 0.55137  |
| FAM153C    | -0.959394391 | 0.0453001 | 0.127315818  | 0.7804247 | -0.559603884 | 0.237258 |
| FAM161A    | -0.426963782 | 0.0452911 | -0.038886893 | 0.8521824 | -0.195505073 | 0.35457  |
| GIN51      | -0.315662096 | 0.0453442 | -0.059680225 | 0.7031607 | -0.013660823 | 0.930486 |
| UBE2K      | 0.232597412  | 0.0453421 | -0.072986488 | 0.5293659 | 0.106909595  | 0.356321 |
| C14orf28   | -0.659326917 | 0.0454151 | -0.358848366 | 0.2648874 | -0.598397998 | 0.064985 |

|            |              |           |              |            |              |          |
|------------|--------------|-----------|--------------|------------|--------------|----------|
| FAM115A    | -0.146850838 | 0.045432  | -0.10355985  | 0.1563366  | -0.239075255 | 0.001114 |
| NCLP1      | -0.648477891 | 0.0454554 | 0.395546543  | 0.1800091  | -0.258199876 | 0.40388  |
| CTNNA1     | 0.158649951  | 0.0455366 | 0.13507512   | 0.0885386  | 0.28562175   | 0.000313 |
| GSTM2      | 0.398376949  | 0.0455268 | 0.145184785  | 0.4653403  | -0.206758941 | 0.306465 |
| PDK1       | 0.315451638  | 0.0455153 | 0.163724272  | 0.2987511  | 0.469659664  | 0.002854 |
| TRIM2      | -0.204637092 | 0.0455155 | -0.200133175 | 0.0500804  | -0.103740618 | 0.309928 |
| MANBAL     | -0.198601352 | 0.0455639 | -0.104705072 | 0.277413   | -0.068118324 | 0.483167 |
| ASB14      | -0.670569003 | 0.0456117 | -0.154869322 | 0.623641   | -0.737422158 | 0.024411 |
| APOD       | 1.901490945  | 0.0456565 | 1.252583933  | 0.1895348  | 3.340807329  | 0.000404 |
| IER3IP1    | -0.235963697 | 0.0456485 | -0.218919082 | 0.0624599  | 0.001943257  | 0.986803 |
| IFT80      | -0.31492479  | 0.0456617 | 0.020002905  | 0.8983304  | 0.181121699  | 0.247772 |
| RPAP1      | -0.39264606  | 0.0458654 | -0.232619269 | 0.2352734  | -0.316984331 | 0.107174 |
| ABCC6P1    | -0.866180714 | 0.0459328 | -0.34546745  | 0.4225854  | -0.979850562 | 0.024577 |
| AC243756.2 | 0.547123671  | 0.0461222 | 0.177679658  | 0.5205516  | 0.266929388  | 0.334692 |
| BCL2L12    | 0.381064111  | 0.0461222 | -0.019587324 | 0.9184322  | -0.094351028 | 0.625031 |
| MORC2      | -0.264193387 | 0.0461046 | -0.199498689 | 0.1307097  | -0.073662302 | 0.576613 |
| NUDT4P1    | 0.547123671  | 0.0461222 | 0.177679658  | 0.5205516  | 0.266929388  | 0.334692 |
| TFAP2A     | -1.333743143 | 0.0461096 | -0.362937431 | 0.5725515  | -0.643696801 | 0.326455 |
| PFN2       | -0.162694688 | 0.0461489 | -0.085100843 | 0.294345   | -0.075355074 | 0.353694 |
| APIP       | -0.217836882 | 0.04638   | -0.021135811 | 0.8420078  | -0.042513551 | 0.69019  |
| C5orf56    | 0.65532606   | 0.0463482 | 0.51724073   | 0.11111817 | 0.309737091  | 0.353227 |
| RNF24      | 0.350301     | 0.0463947 | -0.044221367 | 0.8016925  | 0.022293428  | 0.899321 |
| SIRT7      | -0.321169388 | 0.0463566 | -0.559261408 | 0.000525   | -0.521344274 | 0.001233 |
| SNX10      | -1.542405401 | 0.0463862 | -1.029942098 | 0.1564856  | -0.72301667  | 0.315731 |
| SRSF12     | 0.467619341  | 0.0463554 | 0.920591349  | 7.11E-05   | 0.675843135  | 0.003707 |
| STAT5B     | 0.247428401  | 0.0463159 | 0.253933571  | 0.0400846  | 0.074179373  | 0.550586 |
| TGFBR2     | -0.238671385 | 0.0462746 | -0.553743439 | 3.82E-06   | -0.58450662  | 1.10E-06 |
| ZCRB1      | -0.225288777 | 0.0463595 | 0.039898967  | 0.7202459  | 0.141814431  | 0.202966 |
| ZNF354C    | -0.386748077 | 0.0462709 | -0.275770428 | 0.1533114  | -0.585771841 | 0.002563 |
| UBA52      | 0.201897115  | 0.0464576 | -0.017914846 | 0.8597461  | 0.194677548  | 0.054726 |
| CKMT2      | -0.963824042 | 0.0465916 | -0.259648303 | 0.5747801  | -0.944231307 | 0.051473 |
| ENSA       | 0.211965569  | 0.0466145 | 0.185638248  | 0.0808419  | 0.485995954  | 4.76E-06 |
| UBE2V1     | 0.19398115   | 0.0468129 | 0.089412333  | 0.3589953  | 0.042658238  | 0.662122 |
| CDAN1      | -0.402234166 | 0.0468771 | -0.255001497 | 0.206134   | -0.475593363 | 0.019098 |
| LTB4R      | 0.406998117  | 0.0468668 | 0.088014086  | 0.665846   | -0.031821659 | 0.87693  |
| EPM2A      | 0.930405587  | 0.0469653 | 0.932539331  | 0.0463299  | 0.366479998  | 0.438995 |
| ERF        | 0.318452746  | 0.0469941 | -0.011201972 | 0.9443632  | 0.116437191  | 0.468914 |
| RNF138     | -0.252298947 | 0.0469739 | -0.176997732 | 0.1607951  | -0.026646156 | 0.832711 |
| SPACA4     | -0.837313559 | 0.0469816 | -0.948517471 | 0.0221872  | -0.926990226 | 0.026912 |
| HDAC1      | -0.149657278 | 0.0470611 | -0.183481376 | 0.0146204  | 0.002189299  | 0.976722 |
| TMEM14A    | -0.262942131 | 0.0470249 | -0.236176726 | 0.0690007  | 0.091814801  | 0.473182 |
| TMX1       | -0.189231731 | 0.0470681 | -0.205600148 | 0.0300334  | -0.126071742 | 0.183811 |
| TNK1       | -0.648963203 | 0.0470675 | 0.15526      | 0.6325058  | -0.123763797 | 0.703107 |
| POGZ       | 0.244569335  | 0.0471836 | -0.024578025 | 0.8420596  | -0.235803179 | 0.056658 |
| KIF7       | 0.517847713  | 0.047263  | 0.458186048  | 0.078295   | 0.039597836  | 0.880693 |
| PEX11A     | -0.39344212  | 0.0472635 | -0.756747362 | 0.0001107  | -0.687282707 | 0.000555 |
| THNSL1     | -0.322583024 | 0.0472644 | -0.104746686 | 0.5036968  | -0.15286414  | 0.334817 |

|            |              |           |              |           |              |          |
|------------|--------------|-----------|--------------|-----------|--------------|----------|
| ERCC4      | -0.344564922 | 0.0473682 | -0.113606281 | 0.5095314 | -0.209198025 | 0.226687 |
| ZNF844     | -0.385782652 | 0.0473698 | -0.114385842 | 0.5503682 | -0.23887751  | 0.217758 |
| C11orf52   | -0.444702754 | 0.047465  | -0.591471394 | 0.0086007 | -0.31213792  | 0.161327 |
| METTL23    | -0.270783538 | 0.047497  | -0.182115868 | 0.175162  | -0.175301624 | 0.191749 |
| NKX6-3     | -2.717998006 | 0.0475098 | -3.432976598 | 0.0133127 | -0.378793439 | 0.777532 |
| RNF125     | -0.682984422 | 0.0474796 | -0.525166215 | 0.125479  | -0.564712768 | 0.098562 |
| EEF1A1P3   | 0.765076857  | 0.0475621 | 0.6069904    | 0.1138806 | 0.717513413  | 0.06141  |
| APOPT1     | -0.231328635 | 0.0476643 | -0.279649348 | 0.0151683 | -0.340566207 | 0.003316 |
| CEP57      | -0.289193945 | 0.0477086 | 0.022551546  | 0.8768446 | -0.075898833 | 0.602458 |
| DUOX1      | -0.700627856 | 0.0477031 | 0.52312489   | 0.1288741 | -0.123089568 | 0.723689 |
| DYNLRB1    | 0.239937637  | 0.0476762 | 0.163464227  | 0.1762665 | 0.209952002  | 0.082644 |
| RNF8       | -0.224991322 | 0.0476518 | -0.201215534 | 0.0718098 | -0.310407311 | 0.006129 |
| SKIL       | 0.348444666  | 0.0477217 | 0.310463316  | 0.0776666 | 0.627445927  | 0.00036  |
| EM56-RWC   | 0.681491503  | 0.0477263 | 0.325454681  | 0.347468  | -0.412427234 | 0.274928 |
| ARL8B      | 0.557576339  | 0.0477678 | 0.74314344   | 0.0077995 | 0.659512304  | 0.018397 |
| NOL6       | 0.256690103  | 0.047792  | 0.247627797  | 0.055711  | 0.277613539  | 0.032031 |
| TMEM106B   | -0.195585138 | 0.0477949 | 0.001854675  | 0.9849585 | -0.067623139 | 0.492796 |
| ZNF767     | -0.422302659 | 0.0478242 | -0.211013223 | 0.3183305 | -0.435985387 | 0.040442 |
| PSMD5      | -0.223635743 | 0.0478619 | -0.115994497 | 0.2976218 | -0.277921561 | 0.013221 |
| TRMT11     | 0.265967985  | 0.0479489 | 0.528777012  | 6.90E-05  | 0.272683644  | 0.041138 |
| C11orf83   | -0.311908947 | 0.0480174 | -0.463035803 | 0.0031198 | -0.141370877 | 0.360377 |
| VDAC3      | -0.156242707 | 0.0480013 | -0.087410617 | 0.2647532 | -0.087823156 | 0.263472 |
| ZNF671     | -0.412204464 | 0.0480037 | -0.524797582 | 0.011472  | -0.643994798 | 0.002211 |
| AKR1B10    | -1.414445938 | 0.0481033 | -0.347738757 | 0.6240937 | 1.01627952   | 0.150438 |
| HOOK3      | -0.308540182 | 0.048113  | -0.189895815 | 0.2230898 | -0.032584301 | 0.834489 |
| ZBTB33     | -0.181437207 | 0.0481285 | 0.000245786  | 0.9978406 | -0.124811698 | 0.171669 |
| PCBP1      | 0.238665187  | 0.0481942 | 0.06074471   | 0.6147479 | 0.145092302  | 0.229379 |
| COG3       | -0.219756997 | 0.0482726 | -0.242931896 | 0.0285105 | -0.085012486 | 0.443469 |
| KBTBD4     | -0.292045573 | 0.0482286 | -0.415374119 | 0.0046657 | -0.432827133 | 0.003378 |
| RPUSD4     | 0.187124378  | 0.0482591 | 0.03955496   | 0.6751073 | 0.137349786  | 0.14407  |
| TMEM185B   | 0.236805625  | 0.0482708 | 0.138915289  | 0.2433114 | 0.210322215  | 0.077688 |
| ARFGAP1    | 0.291678547  | 0.048386  | -0.133425287 | 0.367017  | -0.138801899 | 0.348162 |
| DOCK8      | -0.519700511 | 0.0483802 | -0.704227933 | 0.0067507 | -0.421460084 | 0.102324 |
| SDK1       | -0.704961516 | 0.0483214 | -0.733330244 | 0.0384832 | -0.771687333 | 0.030173 |
| SURF2      | -0.348477416 | 0.0483731 | -0.126184922 | 0.4510225 | -0.105472632 | 0.5337   |
| TOP2A      | -0.358185816 | 0.0483664 | -0.026509803 | 0.8837372 | -0.309421893 | 0.087991 |
| AC005517.3 | -0.685010656 | 0.0486752 | -0.120833956 | 0.709257  | -0.062373557 | 0.847799 |
| NARG2      | -0.214918665 | 0.0486798 | 0.089593506  | 0.4056888 | 0.149996904  | 0.165835 |
| ABCD1      | 0.415207834  | 0.0487214 | -0.028564179 | 0.8921172 | 0.122485028  | 0.563234 |
| ARHGAP32   | 0.251922004  | 0.0487568 | -0.015932602 | 0.9008663 | 0.322007538  | 0.011533 |
| COG2       | -0.257078499 | 0.0487323 | -0.282642222 | 0.0297548 | -0.14537026  | 0.263073 |
| FBXO33     | -0.193536153 | 0.0487432 | -0.380355714 | 9.63E-05  | -0.239549508 | 0.013948 |
| FAM199X    | -0.211732901 | 0.0488015 | -0.141843932 | 0.1850159 | -0.033197983 | 0.756391 |
| SAMD4B     | 0.325692707  | 0.0488278 | 0.095714627  | 0.5591332 | -0.035944047 | 0.82766  |
| LATS2      | 0.36200741   | 0.0489775 | -0.082978514 | 0.6522605 | -0.164931245 | 0.371524 |
| OPA3       | 0.223702973  | 0.0489784 | 0.244985987  | 0.0306316 | 0.137027891  | 0.228321 |
| SCOC       | -0.264307183 | 0.0490302 | -0.375826708 | 0.0051014 | 0.048362611  | 0.717648 |

|            |              |           |              |           |              |          |
|------------|--------------|-----------|--------------|-----------|--------------|----------|
| ATP9A      | 0.193275836  | 0.0491787 | 0.010326852  | 0.9162588 | 0.30841254   | 0.001658 |
| PLA2G7     | 1.433137177  | 0.0492237 | 1.500183063  | 0.0381029 | 0.970759992  | 0.187357 |
| PBK        | -0.509513453 | 0.0492857 | -0.085239408 | 0.7401998 | -0.100026634 | 0.697815 |
| ACSM2B     | -0.549311409 | 0.0493708 | 0.258111197  | 0.3374534 | -0.090981185 | 0.738773 |
| AFAP1L1    | -0.78230063  | 0.0493708 | -0.757783678 | 0.0525005 | -1.149454818 | 0.00414  |
| MYO5C      | -0.328263958 | 0.0493539 | -0.324340917 | 0.0518222 | 0.147689469  | 0.373846 |
| COA7       | -0.273640267 | 0.049492  | -0.317530187 | 0.022066  | -0.347386373 | 0.012549 |
| KRT13      | -2.284348613 | 0.0495648 | -1.250344402 | 0.2802269 | 1.092271993  | 0.343395 |
| DOK1       | -0.338727861 | 0.049599  | -0.01350935  | 0.9347396 | -0.424961551 | 0.013032 |
| ACVR1B     | -0.29989494  | 0.0496344 | -0.345253132 | 0.0232554 | -0.392210713 | 0.010081 |
| ZNF799     | -0.34774588  | 0.0496847 | -0.409400959 | 0.0202965 | -0.142569553 | 0.416394 |
| ZNF136     | -0.355037697 | 0.0497643 | -0.594542916 | 0.0010525 | -0.329598748 | 0.069112 |
| ZNF28      | -0.281049155 | 0.0497489 | -0.352723159 | 0.0138212 | -0.196951732 | 0.168754 |
| BICC1      | 0.544903499  | 0.0498893 | 0.593975311  | 0.0323426 | 0.683714717  | 0.013729 |
| RAB5C      | 0.185194307  | 0.0499199 | 0.157610278  | 0.0939729 | 0.260823524  | 0.005575 |
| ZNF501     | -0.679417092 | 0.0499192 | -0.390504052 | 0.2427705 | -0.817125286 | 0.016098 |
| AC003989.4 | 2.013637948  | 0.0205907 | 1.352167043  | 0.1308562 | 0.687297978  | 0.474448 |
| AC005037.6 | 3.605849814  | 0.0071136 | 3.067522311  | 0.022975  | 2.998255974  | 0.026926 |
| AC005488.1 | -2.539495518 | 0.0422948 | -1.489005811 | 0.1786402 | -0.156353759 | 0.863101 |
| AC006548.1 | -3.832014766 | 0.0108876 | -0.477245276 | 0.6831145 | -2.654346567 | 0.05501  |
| AC007272.3 | 3.939941069  | 0.0013378 | 3.130988487  | 0.0139588 | 3.648385329  | 0.003234 |
| AC010733.5 | 2.656517205  | 8.87E-06  | 1.556463171  | 0.0122798 | 2.465719454  | 3.84E-05 |
| AC011737.2 | -4.614755928 | 0.0203022 | -1.110546911 | 0.5298955 | -0.403864273 | 0.817191 |
| AC011933.2 | 2.146057047  | 0.0480153 | 1.888317649  | 0.0821938 | 1.453177327  | 0.193893 |
| AC092338.5 | -2.15830943  | 0.0082621 | -0.618037595 | 0.3106106 | -0.523878823 | 0.390329 |
| AC092798.2 | 1.633288943  | 0.0350926 | 1.367528863  | 0.078147  | 1.130284371  | 0.153897 |
| AC106827.1 | -2.443551536 | 0.0320973 | -1.253265852 | 0.1786452 | -0.994580009 | 0.27822  |
| AC112229.1 | -1.789686905 | 0.0023517 | -1.482777532 | 0.0088524 | -2.024842165 | 0.00064  |
| AC133644.3 | 2.479327836  | 0.0469631 | 1.248158913  | 0.3348526 | -0.232586088 | 0.87381  |
| AC139452.2 | -2.524945525 | 0.0421638 | 0.397989303  | 0.6332129 | 0.952518658  | 0.235082 |
| ACTBP2     | 1.519094627  | 0.0452345 | 1.24809086   | 0.1007933 | 0.417270917  | 0.614956 |
| ADAMTS7P1  | 3.181054061  | 0.0100114 | 1.481111421  | 0.2242952 | 0.460137281  | 0.717982 |
| ADAT3      | 1.283811605  | 0.0152407 | 0.058793342  | 0.9152959 | 0.746177709  | 0.162539 |
| AGXT       | 1.289003065  | 0.0286808 | 1.435574809  | 0.0128749 | 0.810807346  | 0.17408  |
| AIRE       | 1.453183246  | 0.0189614 | 0.73076554   | 0.2357375 | 0.411624461  | 0.519122 |
| ALG1L      | 1.495697295  | 0.0460287 | 0.896091981  | 0.2403322 | 0.587280964  | 0.452992 |
| ALG1L2     | -1.047889477 | 0.044616  | 0.017887404  | 0.9687758 | -0.650854532 | 0.183335 |
| AOAH       | -1.552664784 | 0.0294059 | -0.610546403 | 0.3763546 | -3.360342203 | 2.64E-05 |
| AP000619.5 | 3.821942669  | 0.0290225 | 1.649071903  | 0.3770376 | 0.497898998  | 0.795933 |
| AP001258.5 | 3.00974155   | 0.0048261 | 1.318020793  | 0.2533171 | 1.214576823  | 0.300565 |
| AP004289.2 | -1.90827877  | 0.0463008 | -0.243971101 | 0.7402458 | -0.239375961 | 0.747045 |
| APOBEC2    | 0.945208878  | 0.0346667 | 0.015767157  | 0.9739559 | 0.228153374  | 0.631833 |
| ATP6V1G1P  | -3.576184027 | 0.0147094 | -1.343940233 | 0.290954  | -2.992369359 | 0.04123  |
| B3GAT2     | 2.555854065  | 0.0438102 | 2.158633683  | 0.0893515 | 2.899583718  | 0.021462 |
| BCL2A1     | 4.061528171  | 0.0003104 | 4.093959175  | 0.000258  | 5.261103646  | 2.21E-06 |
| BLID       | 3.649364338  | 0.0108387 | 2.51521839   | 0.0969993 | 0.919984937  | 0.582958 |
| C11orf87   | 4.339792573  | 0.0128207 | 2.420691008  | 0.1714819 | 3.7397266    | 0.032429 |

|             |              |           |              |           |              |          |
|-------------|--------------|-----------|--------------|-----------|--------------|----------|
| C12orf74    | 1.748719637  | 0.003867  | 0.908941491  | 0.1449379 | 1.117838354  | 0.07075  |
| C14orf178   | -1.260873201 | 0.0342638 | -0.449550233 | 0.389803  | -0.48828652  | 0.356042 |
| C15orf43    | 1.534830644  | 0.0325959 | 1.328929344  | 0.0631742 | 1.683003066  | 0.017703 |
| C17orf99    | 1.202992646  | 0.0320552 | 0.736347152  | 0.2026066 | -0.530116618 | 0.371578 |
| C19orf73    | -1.528605151 | 0.021514  | -0.15444444  | 0.7721403 | 0.284093855  | 0.583341 |
| C1DP1       | -2.843480913 | 0.0383891 | -1.370443711 | 0.2945632 | -2.36962848  | 0.077167 |
| C2orf74     | -4.500961707 | 0.0119789 | 0.800938187  | 0.5896146 | -0.152082676 | 0.919143 |
| C5orf49     | -1.575724329 | 0.0200663 | -1.803255045 | 0.0074448 | -0.82976654  | 0.195802 |
| CACNG7      | 1.38717585   | 0.0251944 | 0.535572879  | 0.3846851 | -0.405527585 | 0.538063 |
| CADM3       | -3.234743221 | 0.0382254 | 0.298780345  | 0.8075649 | -4.158096673 | 0.007722 |
| CAMK2N2     | -2.944062281 | 0.0231345 | -0.651922031 | 0.5006384 | -1.358415429 | 0.207039 |
| CCDC135     | -1.809618455 | 0.0104138 | -0.315833868 | 0.6342356 | -0.532425898 | 0.411481 |
| CCDC155     | 1.919234498  | 0.0193497 | 2.006312238  | 0.0121794 | 0.168104947  | 0.863132 |
| CCDC96      | -1.134543111 | 0.0199636 | -0.988675183 | 0.0335919 | -1.316980287 | 0.007268 |
| CCL11       | 1.336618227  | 0.042417  | 0.921937776  | 0.1648013 | 2.084509161  | 0.001134 |
| CD274       | 3.928974123  | 4.48E-07  | 3.371943821  | 1.89E-05  | 3.416125327  | 1.24E-05 |
| CD33        | 1.913151829  | 0.0044991 | 1.759962339  | 0.0075113 | 1.571549267  | 0.021171 |
| CPN2        | 1.222879554  | 0.0155589 | 1.497248567  | 0.0023156 | 1.347743894  | 0.00677  |
| CPNE5       | 1.406260531  | 0.0088954 | 0.384359847  | 0.4841795 | 1.245469428  | 0.020603 |
| CRH         | 3.250780598  | 0.0115404 | 3.743999712  | 0.0027747 | 4.217991531  | 0.000662 |
| CRYBA1      | -2.410088037 | 0.0358426 | -0.876454429 | 0.2692151 | 0.111531071  | 0.873557 |
| CSNK1A1P1   | -1.812751369 | 0.0471724 | 1.064496072  | 0.0847453 | 0.17657016   | 0.796366 |
| CTAGE3P     | -1.49066348  | 0.0112746 | -0.608544405 | 0.2498844 | -1.404168882 | 0.014274 |
| CTBP2P2     | 4.431846306  | 0.0135926 | 3.166259595  | 0.0858167 | 2.626630321  | 0.165347 |
| CTC-260E6.1 | -1.991362913 | 0.0188018 | -1.364929903 | 0.0610043 | -0.856024416 | 0.213629 |
| CTC-459F4.1 | 3.044718167  | 0.0166397 | 2.807019289  | 0.0272741 | 1.535970394  | 0.261365 |
| CTD-2349B8  | -4.346836483 | 0.0002507 | 0.217808854  | 0.7540796 | -1.049100504 | 0.180045 |
| CTD-2372A4  | -2.919283867 | 0.0499028 | -1.699777201 | 0.2500351 | -0.285934728 | 0.820632 |
| CYP4A22     | -2.958407842 | 0.0072587 | -0.162918936 | 0.799904  | -1.203535306 | 0.111398 |
| CYP7A1      | 3.453665236  | 6.38E-05  | 2.776214283  | 0.0014567 | 3.553400295  | 3.61E-05 |
| DDX10P1     | -2.718228573 | 0.0236097 | 0.454107118  | 0.545076  | 0.450214671  | 0.552701 |
| DOC2B       | 3.939288474  | 0.0011789 | 3.332553097  | 0.006737  | 3.328155205  | 0.006761 |
| DUTP1       | -2.852290336 | 0.0065658 | -1.101910571 | 0.1499985 | -1.116594496 | 0.149497 |
| EIF4BP6     | -2.757411499 | 0.0413716 | -0.010463545 | 0.9915225 | 0.103971286  | 0.915851 |
| ETV7        | 2.26515219   | 0.0258421 | 2.162286936  | 0.0328644 | 2.538020283  | 0.011993 |
| FBLL1       | 2.604735537  | 0.0216571 | 1.847284109  | 0.1119844 | 2.226141101  | 0.052082 |
| FCF1P8      | 1.624095211  | 0.0107145 | 0.952631024  | 0.1429361 | 2.353245332  | 0.00014  |
| FDPSP3      | 2.190800175  | 0.017571  | 1.619935793  | 0.0844465 | 1.889104184  | 0.04225  |
| FGF19       | 2.825055022  | 0.0490078 | 3.435326796  | 0.014554  | 2.647819873  | 0.065347 |
| FTH1P16     | -2.223938957 | 0.0156066 | -0.281597203 | 0.6710823 | -1.169394167 | 0.115887 |
| GABRB3      | 1.934221952  | 0.0383847 | 2.301251124  | 0.0124922 | 1.525979871  | 0.107225 |
| GAPDHP21    | -1.593455087 | 0.0329575 | 0.016714248  | 0.9781262 | -0.277986359 | 0.657937 |
| GAPDHP40    | -2.779925868 | 0.0322877 | -0.970847628 | 0.3459204 | -0.402564454 | 0.678895 |
| GAPDHP49    | 4.270600648  | 5.48E-07  | 4.52830539   | 8.92E-08  | 5.227974475  | 5.32E-10 |
| GAPDHP61    | -1.706609445 | 0.0328337 | -0.005362447 | 0.9931055 | -0.346327498 | 0.591842 |
| GBX2        | 4.577063989  | 0.0202835 | 3.07908041   | 0.1260759 | 3.947879982  | 0.046542 |
| GJB7        | -1.158376816 | 0.0484447 | -0.24942648  | 0.6515372 | -0.82505549  | 0.14185  |



|           |              |           |              |           |              |          |
|-----------|--------------|-----------|--------------|-----------|--------------|----------|
| GLDN      | -1.640788874 | 0.0304991 | 0.016441645  | 0.9803099 | -0.668162685 | 0.317184 |
| GUCA1A    | 1.006449066  | 0.0341165 | 0.131301023  | 0.7905001 | 0.28275381   | 0.566529 |
| H3F3C     | -3.399232913 | 0.0231477 | 0.668051022  | 0.5643358 | 0.717100956  | 0.536829 |
| HGFAC     | 2.554148837  | 0.0161833 | 1.130825469  | 0.3067637 | 0.603063182  | 0.6051   |
| HIST1H1T  | -4.092160719 | 0.0016315 | -0.297486188 | 0.7425087 | -2.781888794 | 0.031209 |
| HLA-J     | 1.870107801  | 0.0076651 | -0.102493998 | 0.897397  | 1.043846112  | 0.148641 |
| INRNPA1P1 | 3.217559066  | 0.0074372 | 3.788588033  | 0.0012794 | 3.965531416  | 0.000735 |
| INRNPA1P2 | -1.763602507 | 0.0436782 | -1.424593806 | 0.0774987 | -0.497802004 | 0.501964 |
| INRNPA1P3 | 2.156529961  | 0.0222442 | 2.268818304  | 0.0153068 | 2.629352668  | 0.004734 |
| HSD17B14  | 1.239655511  | 0.0053679 | 0.644170826  | 0.1490245 | 0.198870113  | 0.669171 |
| HSD17B6   | -1.970604386 | 0.0255945 | 0.123587809  | 0.8740161 | -0.873821525 | 0.301399 |
| HSFX1     | 1.414727562  | 0.0156288 | 0.588582946  | 0.3278017 | -0.390235626 | 0.575036 |
| HSPD1P2   | 5.910700673  | 0.000227  | 4.943952456  | 0.0021421 | 5.611083522  | 0.00047  |
| HSPD1P3   | 5.323482882  | 0.0004701 | 5.122687225  | 0.0007597 | 6.039741299  | 6.26E-05 |
| HSPE1P10  | -4.148997062 | 0.0005863 | 0.108616641  | 0.8769457 | 0.438295912  | 0.527292 |
| HSPE1P13  | -2.016964539 | 0.0072425 | -2.086509493 | 0.0043733 | -1.06953975  | 0.101526 |
| HTR3B     | -0.936923431 | 0.0447862 | -0.164896911 | 0.685305  | 0.009170698  | 0.981865 |
| ICAM5     | 2.589929449  | 0.0006896 | 2.112909222  | 0.0058531 | 1.710137518  | 0.027677 |
| IGHEP2    | 3.35871414   | 2.77E-05  | 1.901316837  | 0.0215231 | 2.881240285  | 0.000353 |
| IL10RA    | 2.524276358  | 0.0003341 | 0.818200207  | 0.2564188 | 2.256885139  | 0.001337 |
| IL20      | 6.374034775  | 4.36E-05  | 5.837499756  | 0.0001896 | 6.622167361  | 2.09E-05 |
| IL36G     | 2.813134258  | 0.031608  | 3.21342894   | 0.0123221 | 3.828362195  | 0.002562 |
| IMPDH1P1C | 3.586381567  | 4.19E-05  | 1.793807472  | 0.0449775 | 2.824066773  | 0.001345 |
| INSRR     | 3.064862508  | 0.0343157 | 1.905973116  | 0.1983359 | 3.009290737  | 0.037418 |
| IRX3      | -3.225373867 | 0.0028794 | -1.002617166 | 0.3034394 | -1.361741571 | 0.155999 |
| JSRP1     | 2.897335722  | 0.0268976 | 0.797654729  | 0.5777168 | 0.28716147   | 0.854917 |
| KARSP1    | -2.976904285 | 0.0379335 | -0.192467318 | 0.8691558 | -0.689635153 | 0.578789 |
| KCNE1L    | 1.648500219  | 0.0311672 | 1.590681536  | 0.0352944 | 1.236331221  | 0.113748 |
| KDM5D     | -2.032856547 | 0.0376144 | -0.238844088 | 0.7474858 | -0.9544983   | 0.21113  |
| KIF25     | 2.530749714  | 0.0359952 | 1.561958597  | 0.2149233 | 2.583086303  | 0.030171 |
| KRT18P19  | -3.494803936 | 0.0152259 | -1.289640234 | 0.3008417 | -0.007049502 | 0.994994 |
| KRT18P34  | 1.507084367  | 0.0178127 | 0.778220706  | 0.235089  | 0.875120367  | 0.181852 |
| KRT8P9    | 3.548075476  | 0.0004235 | 2.947703691  | 0.0037661 | 4.056749128  | 4.37E-05 |
| LGALS9B   | 1.668138528  | 0.0202899 | 0.27551034   | 0.7091061 | 1.185481755  | 0.096692 |
| LRR1Q3    | -1.939422996 | 0.0147328 | -0.980006821 | 0.1717767 | -1.695919551 | 0.031642 |
| MADCAM1   | 2.068298794  | 0.0375263 | 1.608393386  | 0.1098512 | -0.16512142  | 0.88531  |
| F2BNB-ME1 | -1.977040528 | 0.0442396 | 0.521692147  | 0.5456996 | -0.213135475 | 0.807755 |
| MIA-RAB4B | 5.696158624  | 0.0008036 | 5.629471227  | 0.0009104 | 5.211945488  | 0.002236 |
| MKRN3     | -2.055392856 | 0.0343217 | 1.1569596    | 0.0877231 | 1.044402924  | 0.139185 |
| MOG       | 1.887253261  | 0.0144486 | 2.022835343  | 0.0059711 | 1.964632856  | 0.011003 |
| MRPL35P3  | -4.512279973 | 0.0056972 | -0.428312022 | 0.7471485 | -4.649811701 | 0.004386 |
| MSC       | 2.666362269  | 0.0407703 | 2.330044022  | 0.0742014 | 1.505813262  | 0.253534 |
| MSMP      | 3.671961121  | 0.0393062 | -0.587540624 | 0.7657456 | -0.951531371 | 0.640407 |
| MTND4P14  | 1.701990866  | 0.0351217 | 2.117162449  | 0.0069905 | 2.720786235  | 0.00043  |
| MTND5P14  | 2.239490869  | 0.0034505 | 1.759659897  | 0.0230153 | 1.663198637  | 0.033381 |
| MTND5P25  | 3.759142871  | 0.0004405 | 2.960092076  | 0.0063337 | 4.112666145  | 0.000105 |
| NANOGP2   | 5.348988834  | 9.47E-06  | 4.489828849  | 0.0002317 | 5.943465216  | 7.14E-07 |

|            |              |           |              |           |              |          |
|------------|--------------|-----------|--------------|-----------|--------------|----------|
| NOTO       | -1.098911464 | 0.0234459 | -0.023892653 | 0.9537368 | -0.019829687 | 0.961932 |
| NPHS1      | 2.680468365  | 5.19E-05  | 3.095230698  | 1.75E-06  | 1.993812915  | 0.002833 |
| NPIPA5     | 4.893695199  | 0.0370346 | 2.896850543  | 0.2287874 | 4.91632431   | 0.035947 |
| NPM1P21    | -2.722714143 | 0.0422642 | -0.431875399 | 0.6740498 | -0.555568971 | 0.596957 |
| NPR1       | 1.36038779   | 0.0330848 | 1.215016685  | 0.0558002 | 1.207656553  | 0.058703 |
| NT5C3AP1   | -1.755526133 | 0.0398511 | 0.010624335  | 0.9868849 | 0.099924803  | 0.877227 |
| OR13H1     | 1.654709967  | 0.0050854 | 1.293691412  | 0.0298622 | 2.433282364  | 1.60E-05 |
| OR2I1P     | 2.088552085  | 0.0144785 | 2.349401219  | 0.0050957 | 3.332104911  | 4.98E-05 |
| OR52N1     | 3.775244192  | 0.0046262 | 2.884458958  | 0.0377069 | 2.625025767  | 0.066239 |
| OR52N3P    | 4.628029175  | 0.0002778 | 3.152096879  | 0.0193721 | 4.095957232  | 0.001507 |
| OR52N5     | 2.908000492  | 0.0324363 | 2.145743233  | 0.1268208 | 1.94136182   | 0.177471 |
| OR52W1     | 3.284389478  | 0.0246336 | 2.379876151  | 0.1139679 | 1.932563399  | 0.215012 |
| OR7E11P    | 3.751584246  | 0.0038977 | 2.560973294  | 0.0658144 | 3.963192012  | 0.001924 |
| OR7E62P    | 2.15604065   | 0.0098593 | 0.633810903  | 0.4809857 | 1.187943797  | 0.172395 |
| OR7E7P     | -1.00460887  | 0.0426513 | -0.581699581 | 0.2018319 | -0.228399844 | 0.606902 |
| OR9Q1      | 3.600673871  | 0.0198538 | 1.50802865   | 0.3925997 | 0.919985723  | 0.603393 |
| P2RY2      | -1.069190635 | 0.0321116 | -0.541376763 | 0.2501276 | -1.099228309 | 0.027367 |
| P2RY8      | -1.704452593 | 0.0240808 | 0.207724445  | 0.7264947 | -0.548200822 | 0.382224 |
| PABPN1L    | -3.095620961 | 0.0351976 | -1.909423047 | 0.1905106 | -0.735256181 | 0.566876 |
| PDE6A      | -4.078043736 | 0.0112195 | 0.677953705  | 0.5956836 | -4.215575474 | 0.008759 |
| PENK       | 3.767219525  | 0.0186105 | 2.742336644  | 0.0903175 | 2.714677099  | 0.09262  |
| PES1P2     | 3.650783588  | 0.0004447 | 2.516134129  | 0.0178054 | 2.252547254  | 0.036191 |
| PGLYRP1    | -3.020063201 | 0.0323783 | -1.84086695  | 0.1892651 | -1.711894635 | 0.222925 |
| PGLYRP2    | 6.228305428  | 2.75E-06  | 5.370112758  | 5.18E-05  | 5.371873796  | 5.75E-05 |
| PIH1D3     | 1.731032967  | 0.0243021 | 1.366588659  | 0.0768556 | 1.060437756  | 0.182744 |
| PLAC8L1    | -1.580874339 | 0.0344963 | -0.563338041 | 0.3466491 | -0.067826398 | 0.904494 |
| PLP1       | 2.921371282  | 0.0246732 | 2.985485974  | 0.0212376 | 3.625797276  | 0.005019 |
| PPP1R14D   | 2.183145347  | 0.0078242 | 2.422723204  | 0.0027125 | 1.160594603  | 0.176382 |
| PPP4R4     | 1.266174412  | 0.0147893 | 1.095880985  | 0.0330891 | 1.09313711   | 0.032202 |
| PRSS30P    | -2.455815815 | 0.0132579 | -0.567677751 | 0.5059992 | -1.28169502  | 0.140906 |
| PSG1       | -3.221753607 | 0.0372849 | 0.760040775  | 0.5414805 | -0.644251199 | 0.630613 |
| PTCHD2     | 1.953800882  | 0.0380949 | 0.838140539  | 0.3904266 | -0.541391688 | 0.666585 |
| PTGDR      | -3.51183332  | 0.0455774 | -3.118551194 | 0.0758334 | -0.810366547 | 0.607273 |
| PTGER1     | 3.403705664  | 0.0221589 | 3.344939188  | 0.0233142 | 1.646830737  | 0.333239 |
| RAET1K     | 1.650340336  | 0.0488227 | 1.417653972  | 0.0907697 | 1.07642285   | 0.208168 |
| RANP1      | -1.607333449 | 0.0255289 | -0.050195796 | 0.9335856 | -0.362645015 | 0.558182 |
| RBMS1P1    | 6.248107474  | 2.09E-06  | 5.699115879  | 1.61E-05  | 6.18683819   | 2.58E-06 |
| RCVRN      | 1.379001486  | 0.0114157 | 1.061418452  | 0.0537333 | 1.492984185  | 0.006165 |
| RGSL1      | -1.904486837 | 0.0281863 | -0.288955462 | 0.7210337 | -1.740218    | 0.042032 |
| P1-131F15. | 2.761374595  | 0.0001681 | 2.160773385  | 0.0036532 | 2.795777466  | 0.000128 |
| P1-228H13. | 3.334920085  | 0.0412015 | 4.493640362  | 0.0040846 | 2.25517821   | 0.192465 |
| P1-232L24. | -3.523033182 | 0.0456313 | -2.293578603 | 0.190716  | -2.227429275 | 0.205256 |
| P1-273G13  | -0.882343438 | 0.026653  | -0.106351457 | 0.7631176 | -0.130883509 | 0.713955 |
| P11-100G15 | 3.076333442  | 0.0289386 | 2.640397804  | 0.0633013 | 2.920957599  | 0.038226 |
| P11-137L10 | 2.434219743  | 0.0213572 | 2.396826999  | 0.022187  | 3.109501023  | 0.002412 |
| P11-17P16. | 2.500744665  | 0.0448312 | 2.286078376  | 0.0663632 | 2.011174446  | 0.113884 |
| P11-182I10 | 3.019359213  | 0.0185696 | 2.145262406  | 0.1035217 | 3.674251998  | 0.003419 |

|            |              |           |              |           |              |          |
|------------|--------------|-----------|--------------|-----------|--------------|----------|
| RP11-1J11. | -1.306382818 | 0.0198017 | -1.198160744 | 0.0263326 | -1.68585497  | 0.003562 |
| P11-210K20 | 1.755711947  | 0.0361686 | 1.386131981  | 0.100707  | 0.705607183  | 0.430458 |
| P11-236F9. | 2.597175487  | 0.0058846 | 2.364377749  | 0.0124226 | 2.242555887  | 0.018448 |
| P11-247I13 | -3.345598802 | 0.0120784 | 0.432062505  | 0.6508559 | -0.454249147 | 0.662438 |
| P11-267C16 | 3.015924725  | 0.0136388 | 1.913663466  | 0.1289114 | 2.478955365  | 0.045126 |
| P11-288E14 | -2.684442994 | 0.032846  | -1.582171582 | 0.114607  | -0.833693154 | 0.367777 |
| P11-311B14 | 2.125102933  | 0.0214296 | 2.54713328   | 0.0043535 | 2.290559434  | 0.011668 |
| RP11-34E5. | 1.911245497  | 0.0229774 | 1.850191811  | 0.0266401 | 0.337971453  | 0.714342 |
| P11-366M4. | -1.54235084  | 0.0467928 | -0.734204787 | 0.3218046 | -0.659960674 | 0.373503 |
| P11-380G5. | -0.994219021 | 0.0256662 | -0.163348306 | 0.6725103 | -0.236100881 | 0.548744 |
| P11-382A18 | 2.885706545  | 0.0355228 | 1.39780265   | 0.3294214 | 2.009011752  | 0.151932 |
| P11-397P13 | -1.911743924 | 0.0334558 | -0.316409464 | 0.6303641 | -0.717242173 | 0.307215 |
| P11-39K24. | 2.959279527  | 0.0122409 | 2.428573811  | 0.0415911 | 3.846465394  | 0.000885 |
| P11-39K24. | 2.925094119  | 0.0020564 | 1.398602819  | 0.1670898 | 2.182681103  | 0.024778 |
| P11-39K24. | 2.298704754  | 0.0320775 | 1.995775622  | 0.0632961 | 3.026387231  | 0.003951 |
| P11-39K24. | 3.644864255  | 0.004784  | 3.606013342  | 0.0050664 | 3.404190788  | 0.008566 |
| P11-432A8. | -3.461755682 | 0.0046844 | -1.977398345 | 0.0455392 | -0.305789263 | 0.70067  |
| P11-432N13 | 1.050691889  | 0.0256091 | 0.641395718  | 0.1799311 | 0.447166651  | 0.364374 |
| P11-462D18 | 1.759106532  | 0.0374841 | 0.290920212  | 0.7543382 | -0.02066609  | 0.983083 |
| P11-467H10 | -2.169503026 | 0.0140192 | -1.336518653 | 0.0901826 | 5.31E-05     | 0.999942 |
| P11-470B22 | 5.870842698  | 4.06E-06  | 5.402912012  | 2.36E-05  | 6.932679865  | 3.78E-08 |
| P11-480I12 | -2.762187786 | 0.0477759 | 0.258977166  | 0.803769  | 0.651077581  | 0.525806 |
| P11-529H22 | 1.547028444  | 0.0238442 | 0.732324464  | 0.3025794 | 1.216398374  | 0.07885  |
| P11-537I16 | -3.397684698 | 0.007395  | 0.511712547  | 0.5487622 | 0.239078985  | 0.785967 |
| P11-561C5. | 4.129128297  | 0.0464745 | 4.631865142  | 0.0252109 | 3.804196088  | 0.066986 |
| P11-568G11 | -1.05747689  | 0.0366156 | 0.013118494  | 0.9748649 | 0.330043615  | 0.417139 |
| P11-655M14 | 3.14761817   | 0.0393739 | 3.388751022  | 0.0229639 | 2.219497688  | 0.170955 |
| P11-655M14 | 3.52462685   | 0.0015169 | 2.862397612  | 0.0106123 | 2.874233902  | 0.010439 |
| P11-734J24 | -3.556337011 | 0.0259129 | -0.304844302 | 0.8182988 | -0.725248018 | 0.595844 |
| P11-74E24. | 3.417569028  | 0.0417527 | 3.003347317  | 0.0749249 | 2.515689785  | 0.143595 |
| P11-777B9. | 2.213991944  | 0.0333608 | 1.979170128  | 0.0571714 | 2.423008729  | 0.017642 |
| RP11-79D8. | 2.692341713  | 0.0186435 | 1.817350393  | 0.11625   | 2.112685302  | 0.066781 |
| P11-813N20 | -2.638434532 | 0.041969  | -1.575474688 | 0.1733124 | -2.058533594 | 0.110752 |
| P11-829H16 | 1.737561593  | 0.0092029 | 1.851311264  | 0.0047962 | 1.369793366  | 0.04261  |
| P11-83J16. | -2.108882906 | 0.0066636 | -0.241402648 | 0.7051919 | -0.081007691 | 0.89866  |
| RP11-8H2.1 | 2.620441231  | 0.0070983 | 1.83883604   | 0.0656117 | 3.196949988  | 0.000776 |
| P13-401N8. | -1.860408211 | 0.02045   | -0.641850902 | 0.362739  | -0.766283306 | 0.283918 |
| P3-342P20. | 3.397124247  | 0.0211462 | 2.854334652  | 0.055396  | 3.111232709  | 0.035659 |
| P3-468K18. | -3.08408933  | 0.0468659 | 0.168939749  | 0.8943859 | -0.180258066 | 0.89039  |
| P5-1041C10 | 1.36968293   | 0.0464406 | 1.377921718  | 0.0420744 | 1.121746796  | 0.105419 |
| P5-1049G16 | 1.106706278  | 0.0399537 | 0.818094732  | 0.1306675 | 0.751587156  | 0.171406 |
| P5-1059H15 | -3.050966293 | 0.038979  | -1.954497467 | 0.1479125 | -1.881043635 | 0.165135 |
| P5-1073F15 | 3.718901718  | 0.0464026 | 0.100259686  | 0.9612341 | 2.241070229  | 0.256522 |
| RP6-24A23. | 1.982185917  | 0.0327888 | -0.023832631 | 0.9816222 | 2.523583907  | 0.005594 |
| RPL12P2    | -2.728550427 | 0.0484311 | -0.520952714 | 0.6586349 | -0.102523051 | 0.927999 |
| RPL13AP20  | -2.665824839 | 0.0041863 | -0.786227    | 0.3068486 | -0.189143336 | 0.801808 |
| RPL13P4    | -3.490097335 | 0.048717  | -0.764313414 | 0.6259062 | -2.906282952 | 0.100725 |

|           |              |           |              |           |              |          |
|-----------|--------------|-----------|--------------|-----------|--------------|----------|
| RPL21P23  | 3.940403245  | 0.0014784 | 3.921355208  | 0.0014524 | 4.572171539  | 0.000169 |
| RPL23AP5C | -2.464071956 | 0.0332887 | -1.120080674 | 0.1801621 | -0.423144944 | 0.578406 |
| RPL31P20  | -4.003287582 | 0.0006754 | -0.768517351 | 0.2775564 | -0.844810722 | 0.241773 |
| RPL37P1   | 2.723601569  | 0.0346657 | 0.675284316  | 0.6464792 | 2.221400003  | 0.090345 |
| RPL4P3    | -1.645235614 | 0.0185259 | 0.169103125  | 0.761135  | -0.324908704 | 0.576472 |
| RPL5P9    | -1.57015913  | 0.0471584 | 0.404747493  | 0.493116  | 0.435937821  | 0.462735 |
| RPL7L1P10 | 2.196834461  | 0.0424641 | 2.084470749  | 0.0526116 | 1.94616068   | 0.07418  |
| RPL7P4    | -1.973769408 | 0.0115601 | 0.004896759  | 0.9926522 | -0.334028426 | 0.551628 |
| RPL7P6    | -2.418664953 | 0.0074679 | -0.427635859 | 0.5032552 | -0.835379102 | 0.215575 |
| RPL7P7    | -1.684399857 | 0.0483491 | 0.308112698  | 0.6618766 | -1.315415305 | 0.100376 |
| RPS15AP3E | 3.766820486  | 0.0219986 | 1.526999734  | 0.4113471 | 2.221183388  | 0.209882 |
| RPS4XP10  | -2.648661892 | 0.0474538 | -0.163217432 | 0.8706637 | -0.753339407 | 0.485011 |
| RPS6P16   | 2.685390653  | 0.0003534 | 2.344975426  | 0.001896  | 2.839243547  | 0.000134 |
| RTEL1P1   | 1.942911527  | 0.0437086 | 1.738895411  | 0.0705269 | 2.308204046  | 0.013882 |
| SAA1      | 2.943114899  | 0.0450985 | 0.100263583  | 0.9531585 | 0.198642887  | 0.907353 |
| SEPT7P9   | -4.258364125 | 0.0060318 | -1.571126341 | 0.2136771 | -3.574088414 | 0.020008 |
| SETP6     | 3.399652569  | 0.0241401 | 3.341017652  | 0.0253919 | 2.233912191  | 0.16791  |
| SH2D1B    | 2.048087289  | 0.0013553 | 1.076436124  | 0.1003141 | 1.886899829  | 0.003294 |
| SIRPB2    | 1.388766827  | 0.0329093 | 0.911839896  | 0.1651672 | -0.34396666  | 0.640602 |
| SLC22A16  | -1.057509389 | 0.0478239 | -0.64591058  | 0.1842721 | -0.205924665 | 0.665086 |
| SLC6A6    | -1.741225713 | 0.0370597 | -0.84780494  | 0.2988491 | -0.998311939 | 0.223707 |
| SNRPGP5   | 2.605353731  | 0.0320631 | 3.160126358  | 0.0072882 | 4.046769406  | 0.00046  |
| SNX25P1   | -2.630315481 | 0.0119253 | -0.851711111 | 0.2589311 | -0.762591389 | 0.312593 |
| SNX5P1    | -1.112990078 | 0.0198515 | -0.302699574 | 0.4762618 | -0.2800938   | 0.512624 |
| SPHKAP    | -3.867143699 | 0.0476734 | -0.604849809 | 0.7272898 | -2.67966416  | 0.168038 |
| SPINK13   | 1.735426109  | 0.0082472 | 0.158056705  | 0.8235464 | 1.066310321  | 0.112033 |
| SPRR2D    | 5.019423825  | 7.19E-05  | 3.029981099  | 0.0223304 | 4.679440204  | 0.000224 |
| SPTA1     | -2.85206089  | 0.0277378 | 0.326339416  | 0.7804026 | -2.121444722 | 0.087314 |
| SRGAP2B   | 4.669795821  | 0.0276219 | 5.311937112  | 0.0116553 | 5.780575361  | 0.005956 |
| SULT1A2   | -1.399255698 | 0.0402457 | -0.049595893 | 0.9366511 | -1.071274951 | 0.108465 |
| TBX10     | -1.426929485 | 0.0205279 | -0.451265078 | 0.3887879 | -0.091719431 | 0.85749  |
| TCAP      | -1.38623861  | 0.0052682 | -1.078555477 | 0.0193621 | -0.85804812  | 0.0692   |
| TCP10     | -3.440682954 | 0.0407458 | -1.030939971 | 0.48878   | -2.213265309 | 0.186171 |
| TDRD6     | -2.474056791 | 0.0404071 | 0.661367941  | 0.5546781 | 0.839452233  | 0.457708 |
| TFAP2B    | -18.63118294 | 1.35E-22  | -0.282602068 | 0.8647241 | -1.614682549 | 0.360046 |
| TMIE      | 2.098730744  | 0.0208019 | -0.432516148 | 0.6798505 | 1.392702633  | 0.132714 |
| TMPRSS11E | -1.560575756 | 0.0443155 | -0.080722083 | 0.9045728 | -0.01279754  | 0.984883 |
| TNFRSF18  | 2.931341059  | 0.0249962 | 1.841673815  | 0.1784396 | 2.751972622  | 0.034812 |
| TNNI2     | -1.519814645 | 0.0146253 | -1.39559233  | 0.0196407 | -0.98377613  | 0.087116 |
| TPM3P6    | -1.955872055 | 0.0351171 | -1.939519861 | 0.0306059 | -0.823093169 | 0.308284 |
| TSPAN32   | 1.959131288  | 0.0145586 | 1.695596065  | 0.0431401 | 0.683777102  | 0.416514 |
| TUBB4A    | -2.616478682 | 0.0382478 | -1.448818782 | 0.1848944 | -2.474001959 | 0.060652 |
| TYRO3P    | -1.306110969 | 0.0224135 | -0.698800963 | 0.1876934 | -0.904746235 | 0.095708 |
| UBA52P6   | 3.070037365  | 0.039099  | 2.095407619  | 0.1849347 | 2.243551771  | 0.153801 |
| UBE2QL1   | 2.358930141  | 0.0317391 | -0.222300438 | 0.8517296 | 2.257557165  | 0.039722 |
| ULBP2     | 3.107399165  | 0.0359418 | 2.965263606  | 0.0445371 | 3.214918639  | 0.028523 |
| USP2      | -1.574307282 | 0.0298407 | -0.371450479 | 0.5679594 | -1.416282981 | 0.043377 |

|             |              |           |              |           |              |          |
|-------------|--------------|-----------|--------------|-----------|--------------|----------|
| USP26       | -2.691686902 | 0.0356135 | 0.319003139  | 0.7714833 | 1.098211311  | 0.318799 |
| WNT10B      | 2.456355844  | 0.0381962 | 3.317082918  | 0.0037754 | 2.211249998  | 0.06369  |
| YBX1P10     | -2.844573245 | 0.0481332 | 1.440989144  | 0.1798993 | 0.783463687  | 0.481578 |
| ZNF300P1    | 1.756872901  | 0.0380322 | 0.912340859  | 0.2985604 | 1.025429693  | 0.240058 |
| ZNF587P1    | -1.440403506 | 0.0413819 | -0.769141942 | 0.2301184 | -0.395402067 | 0.528359 |
| ZNF831      | 3.52997655   | 0.0162486 | 4.554689495  | 0.0011988 | 2.206165589  | 0.167223 |
| ZNF962P     | -4.081942535 | 0.0032379 | 0.448077884  | 0.6517504 | -0.453424964 | 0.663997 |
| ZSWIM5P2    | -3.020861539 | 0.0272394 | -0.054228895 | 0.9571265 | -0.282756605 | 0.784075 |
| RECQL5      | -0.264104706 | 0.0594779 | -0.767110351 | 5.31E-08  | -0.364269231 | 0.009135 |
| STK35       | 0.041073544  | 0.5522343 | -0.373795093 | 8.34E-08  | -0.184581742 | 0.007796 |
| HEXIM1      | -0.191122424 | 0.1420521 | -0.684183471 | 1.76E-07  | -0.722990491 | 3.85E-08 |
| PAIP2B      | -0.210484403 | 0.0831565 | -0.624940573 | 3.49E-07  | -0.521472073 | 2.11E-05 |
| TBC1D20     | -0.100027086 | 0.1594486 | -0.340093738 | 1.68E-06  | -0.303748841 | 2.01E-05 |
| RAB40C      | -0.236775666 | 0.1073179 | -0.702757632 | 2.10E-06  | -0.400355891 | 0.006416 |
| PDRG1       | -0.261739096 | 0.140666  | -0.850458126 | 2.19E-06  | -0.636722095 | 0.000372 |
| MYO1B       | 0.160110657  | 0.1628985 | 0.530277651  | 3.43E-06  | 0.022325146  | 0.845573 |
| IP11-583F2. | 0.282471834  | 0.3996408 | 1.441214894  | 3.44E-06  | 0.85989758   | 0.007265 |
| DPY19L1     | 0.25788627   | 0.1044201 | 0.732499551  | 3.62E-06  | 0.41723176   | 0.008419 |
| NAA30       | -0.038304116 | 0.7113357 | -0.471499156 | 4.85E-06  | -0.501024989 | 1.38E-06 |
| ZMYM3       | -0.137376033 | 0.1467432 | -0.43267668  | 5.22E-06  | -0.594018861 | 5.34E-10 |
| PIK3C2B     | -0.279625245 | 0.0954764 | -0.732393209 | 1.30E-05  | -0.565950014 | 0.000747 |
| DOCK9       | 0.398413385  | 0.0724418 | 0.954787213  | 1.60E-05  | 0.491466372  | 0.026634 |
| SPRY2       | -0.269904517 | 0.1364365 | -0.783471292 | 1.61E-05  | -0.709623135 | 9.42E-05 |
| CYHR1       | -0.156223951 | 0.1852423 | -0.502364554 | 2.19E-05  | -0.238220439 | 0.044169 |
| PRMT2       | -0.042601396 | 0.5256266 | -0.283400549 | 2.35E-05  | -0.184401954 | 0.005968 |
| HM13        | -0.136973501 | 0.1411123 | -0.392878939 | 2.46E-05  | -0.337101541 | 0.0003   |
| ZNF227      | -0.315667812 | 0.061716  | -0.715000624 | 2.55E-05  | -0.641072362 | 0.00016  |
| OVOL1       | -0.094551863 | 0.6000538 | -0.75779145  | 2.95E-05  | -0.182130708 | 0.31191  |
| TNNI3       | -0.348322978 | 0.1747178 | -1.118550978 | 3.52E-05  | -0.320567176 | 0.208728 |
| FPGT        | -0.28323521  | 0.0671665 | -0.63052027  | 3.73E-05  | -0.527215559 | 0.00064  |
| YTHDF2      | -0.119002531 | 0.2918244 | -0.465693781 | 3.80E-05  | -0.320352586 | 0.004593 |
| METTL3      | -0.157703964 | 0.0702549 | -0.356669741 | 3.90E-05  | -0.338795283 | 9.98E-05 |
| GORASP1     | -0.044024764 | 0.6710733 | -0.41918914  | 5.18E-05  | -0.447003404 | 1.63E-05 |
| CLK1        | 0.191135649  | 0.2476753 | 0.665202115  | 5.31E-05  | 0.850373598  | 2.37E-07 |
| SPINK5      | 0.006132083  | 0.9730971 | -0.733231674 | 6.23E-05  | 0.454994913  | 0.011781 |
| PLAGL2      | 0.05917904   | 0.7110046 | -0.643396846 | 6.45E-05  | -0.40317972  | 0.012045 |
| ZBTB42      | -0.095898127 | 0.5403233 | -0.636025686 | 6.55E-05  | -0.071939212 | 0.642222 |
| NARF        | 0.002635537  | 0.9795028 | -0.408166135 | 7.36E-05  | -0.136833446 | 0.18213  |
| CBLN2       | 0.128272456  | 0.7328261 | -1.514712556 | 7.41E-05  | -0.050183382 | 0.89376  |
| ELF1        | -0.234301931 | 0.0628592 | -0.497223268 | 7.81E-05  | -0.314140449 | 0.01249  |
| RGL3        | 0.013688157  | 0.9349362 | -0.666934184 | 8.01E-05  | -0.45278678  | 0.007168 |
| MBOAT1      | -0.044921769 | 0.7802056 | -0.638754814 | 8.28E-05  | 0.110504666  | 0.490054 |
| EPB41L3     | -0.085830543 | 0.7690609 | 1.131943602  | 8.92E-05  | -0.021818977 | 0.940636 |
| PYGO2       | -0.175465191 | 0.2395185 | -0.583996986 | 9.00E-05  | -0.633097424 | 2.49E-05 |
| FER1L4      | -0.332148815 | 0.3059502 | -1.263200415 | 0.0001092 | -0.139289074 | 0.667363 |
| CEBPZ-AS1   | 0.410597642  | 0.1475704 | 1.075626891  | 0.000112  | 1.306299947  | 2.73E-06 |
| SIM1        | -0.361082416 | 0.4121846 | -1.738940531 | 0.0001169 | 0.095958814  | 0.82597  |

|            |              |           |              |           |              |          |
|------------|--------------|-----------|--------------|-----------|--------------|----------|
| TMSB4XP6   | 0.23463737   | 0.1976222 | 0.699743891  | 0.0001182 | 0.738067784  | 4.91E-05 |
| ETV1       | 0.331967706  | 0.1219728 | 0.818797079  | 0.0001264 | 0.089340725  | 0.677607 |
| SPIB       | 0.600234556  | 0.1584459 | 1.606240995  | 0.0001264 | 0.730054007  | 0.084584 |
| TSPAN14    | -0.133984254 | 0.3984856 | -0.608002262 | 0.0001283 | -0.350975604 | 0.027195 |
| ZDHHC18    | -0.169009614 | 0.2182402 | -0.524342928 | 0.0001419 | -0.432452187 | 0.001658 |
| MARK2      | 0.049146243  | 0.6882949 | -0.465473797 | 0.0001627 | -0.218259202 | 0.076061 |
| SFMBT2     | -0.040067267 | 0.861962  | 0.849683624  | 0.0001636 | -0.175407041 | 0.445509 |
| ARID5B     | -0.152032681 | 0.251732  | -0.500330966 | 0.0001659 | -0.81199358  | 1.16E-09 |
| ZNF416     | -0.057048104 | 0.7266977 | -0.62129365  | 0.0001838 | -0.482622281 | 0.003586 |
| CPNE3      | -0.085965134 | 0.2815901 | -0.297172803 | 0.0001888 | -0.101254931 | 0.202907 |
| FAT1       | 0.2226055    | 0.0993137 | 0.502924785  | 0.0001953 | 0.182777449  | 0.17593  |
| TOB2       | 0.021619558  | 0.8240684 | -0.362794844 | 0.0001975 | -0.230375091 | 0.018031 |
| FAR2       | 0.156622648  | 0.363363  | 0.633222869  | 0.0002083 | -0.101519916 | 0.555386 |
| ZNF846     | -0.302712469 | 0.0635435 | -0.604147182 | 0.0002093 | -0.416759951 | 0.010483 |
| TMEM219    | -0.192330952 | 0.083113  | -0.409736013 | 0.0002184 | -0.129998689 | 0.23886  |
| HPS6       | -0.144093336 | 0.2241252 | -0.438275795 | 0.0002273 | -0.25040588  | 0.034324 |
| C10orf55   | 0.761168388  | 0.0866165 | 1.53816633   | 0.0002353 | 2.025754009  | 8.77E-07 |
| COL27A1    | -0.137330988 | 0.3476225 | -0.53750041  | 0.00024   | -0.478586018 | 0.001073 |
| TMEM101    | -0.16382598  | 0.1726691 | -0.441268655 | 0.0002558 | -0.301477454 | 0.012054 |
| RGS10      | -0.004342382 | 0.9818831 | -0.718217268 | 0.0002632 | -0.146503183 | 0.444609 |
| IKZF2      | -0.074054944 | 0.6970933 | -0.696402428 | 0.0002689 | 0.264953323  | 0.162304 |
| CDH10      | 0.16431335   | 0.5658007 | -1.079188472 | 0.0002739 | 0.064953947  | 0.82031  |
| FGF7       | 0.260501824  | 0.3256655 | 0.959106411  | 0.0002828 | -0.068548942 | 0.796086 |
| TRMT2A     | -0.04726407  | 0.7059589 | -0.45537063  | 0.0002855 | -0.314791869 | 0.012105 |
| PWWP2B     | -0.21764675  | 0.3244446 | -0.811219926 | 0.0002916 | -0.361225892 | 0.101986 |
| ALB        | 0.529175004  | 0.4152668 | 2.322479423  | 0.0003198 | 2.839073576  | 1.07E-05 |
| NME7       | 0.210299174  | 0.342213  | 0.791499912  | 0.0003266 | 0.297756612  | 0.177911 |
| CCBE1      | 0.545161131  | 0.1979874 | 1.507142263  | 0.0003305 | 0.166339838  | 0.695925 |
| MRPL54     | -0.097694979 | 0.3974198 | -0.416831879 | 0.0003395 | -0.031160954 | 0.783468 |
| TRIML2     | 1.066470034  | 0.161154  | 2.526483726  | 0.0003524 | 1.03498517   | 0.166397 |
| ZNF551     | -0.180732996 | 0.1922606 | -0.495399574 | 0.0003542 | -0.319870662 | 0.021332 |
| SLC44A2    | -0.014744669 | 0.9174646 | -0.5083987   | 0.0003563 | -0.03275153  | 0.817585 |
| P11-736N17 | 1.561377834  | 0.0511731 | 2.81921142   | 0.0003665 | 2.801136139  | 0.000383 |
| MAPK15     | -0.494664373 | 0.0714111 | -0.992727449 | 0.000369  | -0.925612176 | 0.001002 |
| USP38      | -0.120262019 | 0.1484695 | -0.295457557 | 0.0003716 | -0.270918495 | 0.001136 |
| BCL2       | 0.492449992  | 0.2112407 | 1.389232787  | 0.0003796 | 0.585038082  | 0.137524 |
| ZEB1       | 0.325821204  | 0.1739075 | 0.846680344  | 0.0003985 | 0.208819906  | 0.383575 |
| ZBTB34     | -0.020657539 | 0.7954036 | -0.281917202 | 0.0004066 | -0.125707206 | 0.114116 |
| WHAMM      | -0.359483868 | 0.0591432 | -0.675312074 | 0.0004095 | -0.261950489 | 0.1688   |
| FUT4       | -0.03307108  | 0.8498636 | -0.619407505 | 0.0004113 | -0.177070623 | 0.310814 |
| STON2      | -0.032626524 | 0.8561439 | -0.637124435 | 0.0004179 | -0.178849058 | 0.320059 |
| KIFC2      | -0.040108689 | 0.8352315 | -0.683621612 | 0.0004192 | -0.267821978 | 0.164398 |
| IP6K2      | -0.073964017 | 0.3660255 | -0.287760305 | 0.000434  | -0.303132526 | 0.000216 |
| MAMDC4     | -0.257592867 | 0.1229534 | -0.592050252 | 0.0004367 | -0.613033068 | 0.000267 |
| HDX        | 0.237865477  | 0.2950684 | 0.78874895   | 0.0004394 | 0.534315833  | 0.018122 |
| CDKN2A     | 0.336378475  | 0.5241428 | 1.800070624  | 0.0004402 | 0.304682921  | 0.562673 |
| MAVS       | -0.08764105  | 0.2705624 | -0.279225453 | 0.0004425 | -0.292998949 | 0.000234 |

|          |              |           |              |           |              |          |
|----------|--------------|-----------|--------------|-----------|--------------|----------|
| PLCD1    | -0.291395272 | 0.1152443 | -0.650484194 | 0.0004448 | -0.715600204 | 0.000108 |
| PLCH1    | -0.155631229 | 0.4910326 | -0.796005633 | 0.0004555 | -0.242920909 | 0.281478 |
| DEPTOR   | 0.033439502  | 0.8868685 | -0.82434966  | 0.0004637 | 0.145929055  | 0.534374 |
| FAM83E   | -0.160237885 | 0.4307766 | -0.715926714 | 0.0004646 | -0.038683694 | 0.848471 |
| LDLRAD3  | 0.375365666  | 0.1470391 | 0.891175235  | 0.0004712 | 0.177016701  | 0.490984 |
| FAM156A  | -0.295164047 | 0.893618  | -8.485771056 | 0.0004772 | -1.229990189 | 0.577675 |
| STK38    | -0.132792382 | 0.1136376 | -0.29005997  | 0.0005331 | -0.002164044 | 0.979285 |
| HERC2P8  | 0.113035428  | 0.739358  | 1.161444602  | 0.0005464 | -0.070985331 | 0.834575 |
| C19orf33 | -0.04287016  | 0.7907449 | -0.560763359 | 0.0005492 | -0.019854183 | 0.901984 |
| MMD      | 0.12206291   | 0.4079254 | 0.504661341  | 0.0005509 | -0.014029055 | 0.924186 |
| LNK2     | -0.274255655 | 0.0772913 | -0.536041273 | 0.0005561 | -0.278756766 | 0.072179 |
| ITGA1    | 0.023258071  | 0.9062183 | 0.679206382  | 0.0005642 | -0.136357604 | 0.489779 |
| CD46     | -0.131442113 | 0.1980644 | -0.351133566 | 0.0005841 | -0.136323333 | 0.181746 |
| SLC23A2  | 0.236102481  | 0.0945219 | 0.481211238  | 0.0005843 | 0.266966482  | 0.057289 |
| MED18    | -0.177392118 | 0.1520184 | -0.424316942 | 0.000594  | -0.171808555 | 0.162353 |
| PABPC1L  | -0.119541665 | 0.5076297 | -0.62437104  | 0.0005983 | -0.35749919  | 0.050216 |
| SEPHS1   | -0.018902318 | 0.8552457 | 0.352780534  | 0.0005978 | 0.044768963  | 0.664653 |
| HERC2P5  | 0.105034177  | 0.7569889 | 1.150477942  | 0.0006095 | -0.081862869 | 0.809536 |
| CLP1     | -0.219102657 | 0.0775043 | -0.419964199 | 0.0006658 | -0.328020088 | 0.007922 |
| CYP2W1   | -0.230658054 | 0.463356  | -1.079294145 | 0.0006751 | -0.59089374  | 0.060238 |
| CEP112   | 0.110007852  | 0.4569184 | 0.492454749  | 0.0006769 | 0.384733211  | 0.008863 |
| LUZP2    | -0.699213732 | 0.1351823 | -1.614852193 | 0.0006792 | -0.906265187 | 0.047922 |
| LNK1     | -0.071994843 | 0.7004176 | -0.641126908 | 0.0006891 | -0.356493559 | 0.057038 |
| C16orf54 | 0.81232993   | 0.059628  | 1.363047096  | 0.0007191 | 0.46578794   | 0.291373 |
| EXT1     | 0.133017934  | 0.259363  | 0.397045133  | 0.0007215 | 0.326429883  | 0.00552  |
| SULF1    | 0.111043852  | 0.6967289 | 0.962483241  | 0.0007205 | 0.367994475  | 0.196339 |
| HMOX1    | -0.24539086  | 0.212691  | -0.671417205 | 0.0007232 | -0.689767862 | 0.000541 |
| GC       | -0.252292124 | 0.5337646 | 1.32562607   | 0.0007498 | 0.35117185   | 0.378281 |
| C14orf79 | -0.179054028 | 0.2590149 | -0.532754994 | 0.0007682 | -0.343302694 | 0.031534 |
| ZFYVE21  | -0.225821054 | 0.052275  | -0.389919852 | 0.0007713 | -0.222937185 | 0.054156 |
| HTR2A    | 0.589800631  | 0.1216268 | 1.26326519   | 0.0007813 | -0.314191059 | 0.418425 |
| BZW1     | 0.062749288  | 0.4760245 | 0.295385946  | 0.0007846 | 0.462643353  | 1.44E-07 |
| MAPKAP1  | 0.059775593  | 0.4807418 | 0.281814316  | 0.0007864 | 0.166394679  | 0.048403 |
| KCNMA1   | 1.000804113  | 0.0761669 | 1.866362996  | 0.0008115 | 0.964776445  | 0.087603 |
| MMP9     | 0.381310757  | 0.6943003 | 3.113757191  | 0.0008256 | 1.706419222  | 0.069998 |
| DDX55    | -0.217731559 | 0.0809128 | -0.412648511 | 0.00085   | -0.49110233  | 8.18E-05 |
| TTC31    | -0.013332229 | 0.8787228 | -0.293722777 | 0.0008486 | -0.395899513 | 9.40E-06 |
| MIEF1    | -0.184851843 | 0.097815  | -0.370433307 | 0.0008882 | -0.563200024 | 5.08E-07 |
| PAN2     | -0.266571338 | 0.1433701 | -0.606142753 | 0.0008945 | -0.487349849 | 0.007479 |
| PDCD5    | 0.040424961  | 0.7194496 | 0.368721459  | 0.000906  | 0.201110884  | 0.071938 |
| KIAA1147 | -0.136128685 | 0.1042336 | -0.276997119 | 0.0009134 | 0.017522953  | 0.832939 |
| ACAP3    | -0.149515488 | 0.4326315 | -0.633476993 | 0.000923  | -0.486483647 | 0.010671 |
| KIF21B   | 0.257596902  | 0.2100003 | 0.666473738  | 0.0009246 | 0.810134214  | 5.50E-05 |
| PLA2G4F  | 0.044373187  | 0.9006647 | -1.177503559 | 0.0009274 | 0.206692195  | 0.554388 |
| MFSD6L   | 0.028915333  | 0.9075249 | -0.855027914 | 0.0009453 | 0.002345799  | 0.992441 |
| SLFN13   | 0.210177757  | 0.4853765 | 0.993112927  | 0.0009508 | 0.855308156  | 0.004376 |
| WBP1L    | -0.07924495  | 0.3040382 | -0.253995881 | 0.0009555 | -0.075920139 | 0.321842 |

|             |              |           |              |           |              |          |
|-------------|--------------|-----------|--------------|-----------|--------------|----------|
| MAP6        | 0.71275637   | 0.2379241 | 1.842310782  | 0.0009691 | 1.208290364  | 0.044898 |
| ABCF3       | -0.204149438 | 0.102221  | -0.4120531   | 0.0009805 | -0.19178406  | 0.12407  |
| KALRN       | -0.207193801 | 0.1258755 | -0.44517454  | 0.0010055 | -0.201802115 | 0.135571 |
| C1orf174    | -0.12151017  | 0.1826226 | -0.298205313 | 0.0010295 | -0.249540883 | 0.006201 |
| DAPK1       | -0.059035059 | 0.7588261 | -0.631641423 | 0.0010348 | -0.0730599   | 0.70392  |
| RHOQ        | 0.211103011  | 0.2143081 | 0.554168075  | 0.0010366 | 0.175844955  | 0.299437 |
| ZNF417      | -0.117128303 | 0.3835109 | -0.440516908 | 0.001047  | -0.312560137 | 0.020607 |
| TPM1        | 0.223934924  | 0.0990966 | 0.444584643  | 0.0010496 | 0.445982317  | 0.001014 |
| ERLIN1      | -0.00120536  | 0.9943949 | -0.562725594 | 0.00106   | -0.215800941 | 0.208577 |
| XRCC5       | 0.05625623   | 0.6489087 | 0.403981239  | 0.0010695 | 0.299691177  | 0.015235 |
| CD44        | 0.68416828   | 0.0530788 | 1.155756192  | 0.0010724 | 0.871443697  | 0.013701 |
| SNCAIP      | -0.026435311 | 0.9149781 | 0.801138863  | 0.0010865 | -0.071952944 | 0.771855 |
| ZSWIM1      | 0.107408235  | 0.3375342 | -0.36838686  | 0.0010984 | -0.236060257 | 0.037027 |
| TPD52       | 0.008252154  | 0.9555539 | -0.481534321 | 0.0011443 | 0.235092393  | 0.111327 |
| CLDN9       | -0.44650832  | 0.1331409 | -0.993539832 | 0.0011601 | -0.817576534 | 0.007074 |
| STYXL1      | -0.013102253 | 0.9116394 | -0.384226255 | 0.0011739 | -0.059964614 | 0.609244 |
| CTDSP1      | 0.037335333  | 0.7227332 | -0.342035821 | 0.0011771 | -0.020411138 | 0.846053 |
| FANCG       | -0.349214092 | 0.0739258 | -0.631608694 | 0.0011809 | -0.502807276 | 0.009988 |
| USP48       | -0.166390588 | 0.1700752 | -0.392215947 | 0.0011931 | -0.318400716 | 0.008556 |
| EPOR        | -0.038080291 | 0.8175769 | -0.541973984 | 0.0012018 | -0.39866105  | 0.01688  |
| SUMO1       | 0.052029714  | 0.6674439 | 0.390541704  | 0.0012062 | 0.348971482  | 0.003847 |
| CTC-471F3.  | 1.8467305    | 0.1036683 | 3.570008732  | 0.0012103 | 3.459681913  | 0.001739 |
| CARKD       | -0.144626297 | 0.1568694 | -0.329998729 | 0.0012214 | -0.336863126 | 0.001021 |
| PTPN11      | 0.138937827  | 0.1418084 | 0.305111704  | 0.0012275 | 0.265576802  | 0.004894 |
| ZNF581      | -0.23497764  | 0.1878909 | -0.574969293 | 0.0012673 | -0.50526979  | 0.004772 |
| C1orf106    | -0.033496751 | 0.8143782 | -0.460046853 | 0.0012773 | -0.163044094 | 0.252667 |
| ECE1        | 0.456960732  | 0.0579394 | 0.77528762   | 0.0012821 | 0.755190581  | 0.001713 |
| FN3KRP      | -0.135567243 | 0.188608  | -0.330791818 | 0.0013026 | -0.265950935 | 0.00991  |
| C1orf116    | -0.228356767 | 0.2291901 | -0.610325589 | 0.0013189 | -0.09274256  | 0.624999 |
| KIF13B      | -0.113951216 | 0.3817688 | -0.419034579 | 0.0013173 | -0.065840731 | 0.613116 |
| IP11-61L23. | -0.364655832 | 0.1477009 | -0.810883869 | 0.0013386 | -0.167487532 | 0.493384 |
| ARHGEF10I   | -0.088360818 | 0.6175493 | -0.567230548 | 0.0013582 | -0.307232925 | 0.082688 |
| COLEC12     | 0.203361873  | 0.4276424 | 0.816976708  | 0.0013645 | 0.381246407  | 0.136188 |
| DDIT4       | 0.040715474  | 0.8875915 | 0.919861591  | 0.0013633 | 1.220453673  | 2.14E-05 |
| TM9SF4      | 0.147207311  | 0.0902495 | -0.27896526  | 0.0013635 | -0.191199961 | 0.028142 |
| ZNF20       | -0.402485666 | 0.1348137 | -0.87158746  | 0.0013856 | -0.677786704 | 0.013018 |
| TMEM184A    | -0.325647257 | 0.0735478 | -0.581011343 | 0.0013901 | -0.32582527  | 0.072712 |
| FAM179A     | 0.082930837  | 0.698636  | 0.663340436  | 0.0014349 | 0.331865184  | 0.11598  |
| NBEAL2      | -0.165597197 | 0.2936974 | -0.502315763 | 0.0014596 | -0.154485792 | 0.327052 |
| PTPRR       | -0.478527528 | 0.1099878 | -0.953899462 | 0.0014586 | -0.84214883  | 0.004966 |
| ME3         | -0.088673261 | 0.5691683 | -0.498124059 | 0.00147   | -0.09239261  | 0.549911 |
| MAP3K14     | -0.307998641 | 0.061069  | -0.52193725  | 0.0014775 | -0.578753685 | 0.000499 |
| CWC22       | -0.147194234 | 0.0762001 | -0.261940177 | 0.001485  | -0.166513675 | 0.043463 |
| TTI1        | -0.044498268 | 0.6620121 | -0.323553741 | 0.0014877 | -0.374466695 | 0.000263 |
| C15orf52    | -0.04933889  | 0.8924584 | 1.09808932   | 0.0014899 | 0.769277052  | 0.026395 |
| RNF34       | -0.162404932 | 0.1466864 | -0.353326109 | 0.00154   | -0.23249032  | 0.03752  |
| P11-551L14  | 0.355193516  | 0.473059  | 1.54975037   | 0.0015412 | -0.26593462  | 0.593405 |



|            |              |           |              |           |              |          |
|------------|--------------|-----------|--------------|-----------|--------------|----------|
| ELMO3      | -0.110245356 | 0.3736417 | -0.392925326 | 0.0015444 | -0.083526567 | 0.496114 |
| TMEM9      | 0.054434976  | 0.5849955 | -0.316488291 | 0.0015565 | -0.025803064 | 0.795325 |
| MEPCE      | 0.019034077  | 0.8668908 | -0.359780739 | 0.0015827 | -0.294922352 | 0.009678 |
| DNAJB6     | 0.153864656  | 0.1273229 | 0.31694838   | 0.0015929 | 0.373921637  | 0.000197 |
| CRELD1     | -0.104573851 | 0.5636425 | -0.572178035 | 0.0016191 | -0.504915588 | 0.005413 |
| APLF       | 0.015988432  | 0.918449  | 0.47777706   | 0.001636  | 0.185931932  | 0.227374 |
| JTB        | -0.160853017 | 0.1178756 | -0.322904061 | 0.0016468 | 0.067894104  | 0.504403 |
| C5orf63    | -0.390605355 | 0.3682726 | 1.291340546  | 0.0016548 | 0.048676337  | 0.90922  |
| WASL       | -0.117260424 | 0.1453109 | -0.252529816 | 0.0016692 | -0.132200423 | 0.099665 |
| PFKFB4     | -0.397966177 | 0.1617229 | -0.894917835 | 0.0016771 | -1.175038719 | 3.78E-05 |
| PRKAB1     | -0.18321689  | 0.105986  | -0.356440222 | 0.0016807 | -0.349128871 | 0.002141 |
| VPS4A      | -0.12889947  | 0.1073862 | -0.249802849 | 0.0017166 | -0.200173315 | 0.012032 |
| WDR53      | -0.353875845 | 0.1717385 | -0.807126974 | 0.0017289 | -0.464275408 | 0.073513 |
| TNMD       | 0.501358029  | 0.481779  | 2.209586907  | 0.0017323 | 0.765527402  | 0.281062 |
| FAM110C    | 0.479124113  | 0.0560436 | 0.774305262  | 0.0017789 | 1.17310136   | 1.95E-06 |
| MYH11      | 0.930177912  | 0.0858393 | 1.689772724  | 0.0017811 | 0.578684717  | 0.285682 |
| SRC        | -0.147239936 | 0.2678909 | -0.415041484 | 0.0017978 | -0.162793011 | 0.219808 |
| KHDRBS3    | -0.083571635 | 0.7835446 | 0.936320902  | 0.0018005 | -0.023892473 | 0.937459 |
| TCF12      | 0.212526845  | 0.1273653 | 0.433701955  | 0.0018227 | 0.019097874  | 0.890994 |
| ANAPC16    | -0.126952073 | 0.2430156 | -0.337830609 | 0.0018427 | -0.146361465 | 0.176254 |
| RCC2       | 0.202553699  | 0.0556106 | 0.32733499   | 0.0018687 | 0.395894886  | 0.000169 |
| RNF223     | -0.487628049 | 0.0746741 | -0.856642678 | 0.0018829 | -0.126784877 | 0.63509  |
| TM9SF1     | -0.047424008 | 0.6024691 | -0.282327517 | 0.0018828 | -0.124546088 | 0.169153 |
| PDXDC1     | -0.102133943 | 0.283405  | -0.295045384 | 0.001935  | -0.085026232 | 0.37105  |
| P11-460N11 | 0.469647155  | 0.0691797 | 0.794200238  | 0.001976  | 0.417587329  | 0.105694 |
| GANAB      | 0.14904148   | 0.0937016 | -0.275495275 | 0.0019805 | -0.196290276 | 0.027544 |
| DCAF5      | -0.153502072 | 0.0751665 | -0.265051076 | 0.0019952 | -0.243515305 | 0.004593 |
| RALGPS2    | -0.165819671 | 0.2391815 | -0.434615849 | 0.0020039 | -0.201700544 | 0.151637 |
| TAOK2      | 0.0349283    | 0.7182565 | -0.299682761 | 0.0020042 | -0.218221366 | 0.024524 |
| RPS12P26   | 0.560023083  | 0.2722679 | 1.455367919  | 0.0020083 | 1.860740972  | 6.19E-05 |
| HDAC10     | -0.185421175 | 0.3998817 | -0.686335924 | 0.002021  | -0.433920351 | 0.050242 |
| TRIM36     | 0.651584705  | 0.1415828 | 1.359915679  | 0.0020248 | 1.45186737   | 0.000758 |
| UCP2       | 0.30571271   | 0.2897162 | -0.901988517 | 0.0020582 | 0.159751739  | 0.58062  |
| CBWD2      | 0.207717945  | 0.0789382 | 0.359273572  | 0.0021342 | 0.272725254  | 0.020343 |
| SLC23A1    | -0.523399664 | 0.3390482 | 1.478261054  | 0.0021658 | 0.012946271  | 0.980173 |
| TRIP12     | 0.022339102  | 0.805312  | 0.277433578  | 0.0021695 | 0.274741098  | 0.002399 |
| HTN3       | 0.16256266   | 0.5510971 | 0.811324991  | 0.0021984 | 0.309108792  | 0.251168 |
| POLL       | -0.072863392 | 0.5839599 | -0.409449567 | 0.0022012 | -0.290023451 | 0.029554 |
| FAP        | -0.181859354 | 0.7558995 | 1.75288152   | 0.0022229 | 0.921042903  | 0.110684 |
| KLHL12     | -0.13319322  | 0.1872393 | -0.30681332  | 0.0022209 | -0.158858025 | 0.113271 |
| SGSM3      | -0.01851532  | 0.8874126 | -0.401505079 | 0.0022227 | 0.02728639   | 0.834637 |
| PCDH20     | 0.02963267   | 0.8983264 | -0.715974841 | 0.0022272 | -0.468406746 | 0.044756 |
| C9orf172   | -0.283703483 | 0.2224904 | -0.722531796 | 0.002234  | -0.479604102 | 0.040044 |
| MTUS2      | 0.998793941  | 0.1519515 | 2.097716749  | 0.0023058 | -0.090348668 | 0.897276 |
| SULF2      | 0.047161423  | 0.7578646 | 0.465298266  | 0.0023161 | -0.379149832 | 0.013305 |
| DNALI1     | -0.246816661 | 0.1120864 | -0.472666434 | 0.0023206 | -0.362884485 | 0.019534 |
| ARAP1      | -0.014067623 | 0.923765  | -0.448567292 | 0.0023338 | -0.391629597 | 0.007871 |

|           |              |           |              |           |              |          |
|-----------|--------------|-----------|--------------|-----------|--------------|----------|
| CREBZF    | -0.058351635 | 0.5463274 | -0.293614741 | 0.0023625 | -0.102225039 | 0.289406 |
| SALL2     | 0.925963038  | 0.0677518 | 1.514930802  | 0.0023623 | 0.723665334  | 0.14927  |
| CLMP      | 0.20643652   | 0.422649  | 0.77908793   | 0.0023981 | 0.422184857  | 0.100644 |
| KRT6B     | 1.52888667   | 0.1635497 | 3.32507437   | 0.0023934 | 2.830273733  | 0.009773 |
| RFX6      | -0.807984485 | 0.1485082 | -1.840683094 | 0.0023967 | -1.947170883 | 0.001756 |
| CCDC85C   | -0.046638963 | 0.7585959 | -0.459262475 | 0.0024927 | -0.086384424 | 0.568977 |
| CDC42SE1  | 0.083027739  | 0.4163865 | -0.309354556 | 0.0024928 | -0.027683174 | 0.786391 |
| KRT18P59  | 0.587006671  | 0.3009948 | 1.609420941  | 0.0025095 | 1.007052569  | 0.066486 |
| ZNF263    | -0.158751375 | 0.0929925 | -0.285122339 | 0.0025133 | -0.081406688 | 0.3876   |
| GRHL2     | -0.250711542 | 0.1140955 | -0.478576426 | 0.002537  | -0.294057101 | 0.06301  |
| ATP9B     | 0.178286006  | 0.3244358 | 0.544215962  | 0.0025476 | 0.1198012    | 0.507576 |
| SNAI1     | 0.146445439  | 0.5053428 | 0.644926632  | 0.0025761 | 0.225114186  | 0.301309 |
| TMEM38A   | -0.282592563 | 0.2555091 | -0.750799783 | 0.0026042 | 0.078761098  | 0.749615 |
| MKX       | 0.797612496  | 0.2949648 | 2.232165833  | 0.0026245 | 0.766135313  | 0.312861 |
| PDGFA     | -0.398560524 | 0.0805794 | -0.685587969 | 0.00263   | -0.254422065 | 0.259722 |
| TOP3B     | -0.175182199 | 0.1357294 | -0.351667948 | 0.002645  | -0.369822662 | 0.001663 |
| RUNX1T1   | 0.621415192  | 0.068192  | 1.022194507  | 0.002667  | 0.26899733   | 0.430446 |
| NAA38     | 0.022122792  | 0.8803799 | 0.437807038  | 0.0026911 | 0.483190441  | 0.000936 |
| ABO       | -0.538111362 | 0.0612757 | -0.864568619 | 0.0027087 | -0.26252254  | 0.356359 |
| MMP13     | 0.00200678   | 0.9981575 | 2.480665419  | 0.0027286 | 3.642732391  | 9.75E-06 |
| SUSD5     | -0.164184529 | 0.6816426 | 1.118090497  | 0.0027266 | -0.349878128 | 0.383744 |
| C4BPB     | 0.350239673  | 0.2134949 | 0.820106426  | 0.0028317 | -0.120010535 | 0.67302  |
| CAB39L    | -0.273463706 | 0.1154838 | -0.519109616 | 0.0028742 | -0.112468761 | 0.516058 |
| SRSF3     | 0.229884158  | 0.0841915 | 0.396216361  | 0.0028711 | 0.468179569  | 0.000428 |
| RITA1     | -0.232165485 | 0.0856031 | -0.399773273 | 0.0029253 | -0.26665208  | 0.046452 |
| POLH      | -0.199559449 | 0.1940541 | -0.455056007 | 0.0030017 | -0.317570829 | 0.038192 |
| ALKBH4    | -0.213872098 | 0.2826067 | -0.591315255 | 0.0030101 | -0.593669365 | 0.003196 |
| EEF1DP3   | -0.054462186 | 0.8634981 | -0.967889716 | 0.0030165 | 0.052479201  | 0.865977 |
| SSXP10    | -0.215147026 | 0.4048775 | -0.769773916 | 0.0030177 | -1.005452779 | 0.000118 |
| DHX29     | 0.188505113  | 0.2222206 | 0.455890224  | 0.0030254 | 0.305029818  | 0.047698 |
| KCND3     | 0.58269293   | 0.1183428 | 1.097703996  | 0.0030656 | 0.12061883   | 0.747312 |
| PAGR1     | -0.176090573 | 0.0880724 | -0.304306864 | 0.0030413 | -0.220628551 | 0.031599 |
| P11-726G1 | 0.288812803  | 0.2026796 | 0.655270056  | 0.0030448 | 0.251528133  | 0.264936 |
| SCGB3A2   | -0.008010506 | 0.9909181 | 2.02088695   | 0.0030456 | -0.157688796 | 0.82259  |
| SEPSECS   | 0.286699908  | 0.1077065 | 0.519589428  | 0.0030561 | 0.416839704  | 0.018687 |
| SPRN      | -0.050852511 | 0.8394399 | -0.780054049 | 0.0030627 | -0.230747943 | 0.359666 |
| USP21     | -0.103361176 | 0.5265625 | -0.486699083 | 0.0030588 | -0.588442557 | 0.00042  |
| ARHGAP22  | 0.316883919  | 0.2663486 | 0.825409851  | 0.0030895 | 0.223774258  | 0.431798 |
| TRMT5     | -0.256719293 | 0.1692859 | -0.549696311 | 0.0031028 | -0.212690516 | 0.253825 |
| RASSF4    | 0.284561061  | 0.1958704 | 0.641927631  | 0.0031418 | -0.073930681 | 0.737572 |
| PLXNA4    | 0.450282862  | 0.2125625 | 1.049895983  | 0.0031568 | 0.704270385  | 0.051182 |
| NCOA6     | 0.090782104  | 0.5663674 | -0.46893973  | 0.0031674 | -0.121886748 | 0.441928 |
| PDE4D     | 0.297277956  | 0.1011228 | 0.533664926  | 0.0031767 | 0.598074986  | 0.000944 |
| CCDC6     | -0.196409391 | 0.0692505 | -0.318481435 | 0.0031818 | -0.172486361 | 0.10975  |
| CYP4V2    | 0.168129788  | 0.4955509 | 0.715086907  | 0.0032238 | 0.241165471  | 0.326651 |
| C1orf210  | -0.377473445 | 0.0729014 | -0.619449481 | 0.003253  | -0.486813111 | 0.020572 |
| PROC      | -0.212772021 | 0.4004052 | -0.7490777   | 0.0032881 | -0.445721996 | 0.077282 |

|           |              |           |              |           |              |          |
|-----------|--------------|-----------|--------------|-----------|--------------|----------|
| ZBTB25    | 0.213224489  | 0.188057  | 0.470315192  | 0.0033023 | 0.383364062  | 0.017067 |
| GOLGB1    | -0.033147272 | 0.6125643 | -0.192163891 | 0.0033101 | -0.005454565 | 0.933493 |
| TCTN1     | -0.015309981 | 0.9014    | 0.357763492  | 0.0033318 | 0.057940739  | 0.637443 |
| GRASP     | 0.562730657  | 0.0616485 | 0.862766705  | 0.0033784 | 0.672258216  | 0.024051 |
| BMPR1B    | -0.06117745  | 0.8288132 | 0.817737446  | 0.003393  | 0.340040316  | 0.226181 |
| C12orf23  | -0.171409034 | 0.111642  | -0.3151205   | 0.0034203 | -0.214428371 | 0.046368 |
| HNRNPC    | 0.00270114   | 0.9775352 | 0.280446068  | 0.0034281 | 0.340111     | 0.000387 |
| RFNG      | -0.314506307 | 0.1194866 | -0.589781938 | 0.0034347 | -0.204069908 | 0.310337 |
| PIGV      | -0.092366398 | 0.4621764 | -0.367858254 | 0.0034461 | -0.100436388 | 0.421504 |
| ZFP28     | -0.239957798 | 0.195434  | -0.541972026 | 0.0034708 | -0.378081418 | 0.040946 |
| ERLEC1P1  | 0.068259537  | 0.8501429 | 0.958422987  | 0.0035311 | -0.006743638 | 0.985008 |
| SPIRE2    | 0.082357729  | 0.6036825 | -0.465335836 | 0.0035354 | -0.133697295 | 0.400613 |
| CCDC80    | 0.011405655  | 0.9666634 | 0.7942587    | 0.0035401 | -0.35262771  | 0.196662 |
| RAB14     | 0.012944004  | 0.8893238 | -0.271458438 | 0.0035639 | -0.100080191 | 0.281812 |
| CCDC74A   | 0.09869308   | 0.7055279 | 0.737673114  | 0.0035898 | 0.031066081  | 0.90484  |
| RAB3A     | -0.712840675 | 0.0930041 | -1.239562181 | 0.0036168 | -1.095153198 | 0.009179 |
| SLC35A1   | -0.188139272 | 0.0661099 | -0.295741287 | 0.0036303 | -0.122051735 | 0.228198 |
| CTSC      | -0.098631411 | 0.5427079 | 0.469056912  | 0.003734  | -0.238474364 | 0.141084 |
| XRN1      | 0.247836197  | 0.1880525 | 0.544758975  | 0.0037348 | 0.283903682  | 0.131004 |
| RRC37A16l | 0.083401323  | 0.5950017 | 0.452004674  | 0.0037431 | 0.453365579  | 0.003587 |
| CCNT2     | 0.095906526  | 0.2618174 | 0.245364345  | 0.0038049 | 0.247171022  | 0.003642 |
| SPICE1    | 0.233719455  | 0.126156  | -0.441832537 | 0.0038045 | 0.194983367  | 0.200553 |
| NAV3      | -0.110607663 | 0.5451375 | 0.52314967   | 0.0038696 | 0.151103213  | 0.406246 |
| SMIM6     | -0.242039081 | 0.3141166 | -0.697650541 | 0.0038691 | 0.131420873  | 0.580623 |
| ADCY5     | 0.471860213  | 0.1416382 | 0.922327347  | 0.0039041 | 0.090616402  | 0.780757 |
| FKBPL     | -0.274775492 | 0.1282884 | -0.52192501  | 0.003907  | -0.266176699 | 0.135175 |
| FBXL14    | -0.233083642 | 0.308261  | -0.663452103 | 0.0039464 | -0.096961184 | 0.670305 |
| GOLGA1    | 0.074531199  | 0.7246411 | -0.610366245 | 0.0039444 | -0.439427633 | 0.037542 |
| TMEM170A  | -0.169028158 | 0.0838499 | -0.280572622 | 0.0040068 | -0.138867165 | 0.154447 |
| ZDHHC20   | -0.095963025 | 0.2811295 | -0.255659886 | 0.0040591 | 0.024488311  | 0.782824 |
| SMG9      | -0.063447126 | 0.5685235 | -0.317262698 | 0.004076  | -0.255967142 | 0.021102 |
| RTN3      | -0.08934073  | 0.3653448 | -0.2831508   | 0.004102  | 0.004453595  | 0.963884 |
| PBX3      | 0.237272919  | 0.2891008 | 0.638450397  | 0.0042058 | -0.031491233 | 0.888265 |
| ZNF783    | -0.053301062 | 0.7773401 | -0.539170548 | 0.004206  | -0.283698194 | 0.132921 |
| ENO1P4    | -2.203873379 | 0.1719676 | -5.27521894  | 0.0042398 | -1.515903303 | 0.337475 |
| IFIT1     | 0.09367668   | 0.7559594 | 0.851372295  | 0.0042648 | 0.409138551  | 0.171786 |
| ZNF256    | -0.243829229 | 0.0634148 | -0.37137702  | 0.0042691 | -0.422147423 | 0.001336 |
| C19orf10  | -0.087334193 | 0.5021989 | -0.372260211 | 0.0042765 | -0.013010791 | 0.920073 |
| SLC30A3   | 0.335237107  | 0.4790378 | 1.29770288   | 0.0042809 | 0.101468034  | 0.831288 |
| IGFBP7    | -0.11592579  | 0.5710704 | 0.582828735  | 0.0042904 | 0.473564622  | 0.020361 |
| SRSF5     | -0.195680726 | 0.0784383 | -0.317320773 | 0.0043061 | -0.251695391 | 0.023569 |
| PEX13     | -0.167377027 | 0.0946324 | -0.285145326 | 0.004332  | -0.237814455 | 0.017379 |
| NDUFA4L2  | -0.088908398 | 0.8396486 | -1.261353198 | 0.0043672 | -0.332435599 | 0.449535 |
| TMEM41B   | -0.143903447 | 0.121005  | -0.263687586 | 0.0044073 | -0.22530777  | 0.015102 |
| NFIL3     | 0.328592929  | 0.1509245 | 0.647004351  | 0.0044916 | 0.82289435   | 0.000299 |
| C11orf35  | -0.169505779 | 0.5480702 | -0.819737658 | 0.0045375 | -0.456448298 | 0.105357 |
| KCNK3     | 0.412610658  | 0.2824587 | 1.049282099  | 0.0045597 | 0.107798295  | 0.780882 |

|            |              |           |              |           |              |          |
|------------|--------------|-----------|--------------|-----------|--------------|----------|
| CXXC1      | -0.231522046 | 0.0924295 | -0.389900105 | 0.0045843 | -0.381931814 | 0.005445 |
| MAK        | 0.34725092   | 0.2319195 | 0.770437522  | 0.0046004 | 0.620274146  | 0.027581 |
| NAGPA      | -0.370859892 | 0.1205246 | -0.674931955 | 0.0046195 | -0.400196591 | 0.092702 |
| IFT57      | 0.045228749  | 0.7421979 | 0.385573634  | 0.0046606 | 0.38636724   | 0.004598 |
| IRF9       | -0.242562779 | 0.1227885 | -0.444717798 | 0.0046734 | -0.184724443 | 0.238895 |
| P11-848G14 | 0.440233292  | 0.5313979 | 1.911972714  | 0.0046818 | 1.489598474  | 0.029179 |
| SLITRK6    | -0.013387151 | 0.9614161 | -0.783838357 | 0.004679  | -0.368239205 | 0.18352  |
| GTF2H2B    | -0.306557085 | 0.0554064 | -0.451703308 | 0.0047195 | -0.347139209 | 0.029872 |
| ZNF542     | -0.038945074 | 0.8300343 | -0.511986809 | 0.0047204 | -0.491248684 | 0.007025 |
| ABCA8      | -0.373466756 | 0.6054449 | 1.985309187  | 0.0047459 | 1.71451735   | 0.014799 |
| GCC1       | 0.124143712  | 0.2684503 | -0.318571485 | 0.004742  | -0.028480396 | 0.799653 |
| SUB1       | -0.036461613 | 0.6750841 | 0.244608204  | 0.0047468 | 0.206614219  | 0.017186 |
| SMARCC1    | 0.100013307  | 0.2384689 | 0.238682637  | 0.0047884 | 0.050916872  | 0.548131 |
| ZBTB2      | -0.11791657  | 0.2046356 | -0.260968415 | 0.004792  | -0.248748609 | 0.007425 |
| PCDHB2     | 0.218168239  | 0.1526433 | 0.4269245    | 0.0048118 | 0.017404068  | 0.909261 |
| PIK3AP1    | 0.608124867  | 0.0835487 | 0.988343263  | 0.0048385 | 0.429931929  | 0.220854 |
| STOX2      | -0.281157064 | 0.3133764 | -0.781098061 | 0.0048391 | -0.198119601 | 0.474098 |
| 11-Sep     | 0.161078511  | 0.1681599 | 0.328506249  | 0.0049077 | 0.225563488  | 0.053508 |
| ABCC4      | 0.105895603  | 0.6012794 | 0.565432505  | 0.0049316 | 0.029146675  | 0.885365 |
| MAP4K5     | 0.18233396   | 0.0630877 | 0.274292748  | 0.0049719 | 0.252632613  | 0.009729 |
| IRF2BP2    | 0.219655845  | 0.121967  | 0.397320484  | 0.0050494 | 0.271353441  | 0.055727 |
| BTBD1      | -0.05232332  | 0.5583302 | 0.249052073  | 0.0050541 | 0.171753773  | 0.053518 |
| CABLES1    | -0.436305127 | 0.0716882 | -0.677561896 | 0.0050895 | -0.287974315 | 0.229742 |
| MPP1       | 0.101723007  | 0.6284189 | 0.571274908  | 0.0050748 | -0.535691704 | 0.012576 |
| PGRMC2     | -0.304817187 | 0.0799959 | -0.4873054   | 0.0050793 | -0.259234473 | 0.135873 |
| RPF2       | 0.150588446  | 0.3213978 | 0.423760082  | 0.0050852 | 0.531546061  | 0.000441 |
| HSCB       | -0.123328267 | 0.3627275 | -0.379022261 | 0.005103  | -0.299090046 | 0.026502 |
| SYTL5      | -0.255552682 | 0.1440798 | -0.489380211 | 0.0051497 | 0.032425246  | 0.852429 |
| SH3BGR1    | 0.053825594  | 0.5524334 | 0.251807045  | 0.0051842 | 0.164866955  | 0.067979 |
| PDE4DIP    | -0.297451982 | 0.0519775 | -0.4259627   | 0.0052337 | -0.386161448 | 0.011503 |
| VILL       | -0.121196197 | 0.4950284 | -0.495995179 | 0.0052545 | 0.062767895  | 0.723451 |
| CLCN7      | 0.070407914  | 0.6239008 | 0.394971094  | 0.0053537 | 0.084545486  | 0.556887 |
| EFCAB4A    | -0.098056914 | 0.6410525 | -0.593237965 | 0.0053543 | 0.179153884  | 0.391199 |
| BTBD8      | -0.264311116 | 0.4599642 | -1.059348279 | 0.0053759 | -0.691911304 | 0.061453 |
| ZNF222     | -0.381028163 | 0.0647476 | -0.568710165 | 0.0054512 | -0.447343464 | 0.028596 |
| KLHL28     | -0.200608487 | 0.1254477 | -0.361355948 | 0.0054562 | 0.002656143  | 0.983677 |
| HHLA1      | 0.048229144  | 0.9257342 | 1.419594003  | 0.0054825 | 0.087964851  | 0.864713 |
| TIGD5      | -0.280637311 | 0.1023569 | -0.475279575 | 0.0054935 | -0.58219253  | 0.000801 |
| FAM219B    | -0.17575847  | 0.1878656 | -0.369106782 | 0.0055142 | -0.350394524 | 0.008532 |
| SLC26A6    | -0.280053943 | 0.1064241 | -0.480025243 | 0.005556  | -0.331593521 | 0.056169 |
| TMTC2      | 0.193482717  | 0.3242767 | 0.542879367  | 0.0055586 | -0.118000775 | 0.548176 |
| CBWD5      | 0.234709693  | 0.0843794 | 0.374690108  | 0.0055565 | 0.266931019  | 0.048662 |
| CCNDBP1    | -0.145009816 | 0.2659912 | -0.361274652 | 0.0055728 | -0.074991784 | 0.563106 |
| ELF5       | -0.30043811  | 0.2560522 | -0.731987338 | 0.0055748 | -0.828502745 | 0.001906 |
| KTI12      | -0.266205809 | 0.0662091 | -0.398249522 | 0.0055822 | -0.448504492 | 0.002045 |
| KDM4C      | -0.205597601 | 0.1707692 | -0.415633332 | 0.0056086 | -0.227750892 | 0.128751 |
| MEIS1      | 0.293660289  | 0.23129   | 0.678400154  | 0.0056402 | 0.068938236  | 0.778706 |

|            |              |           |              |           |              |          |
|------------|--------------|-----------|--------------|-----------|--------------|----------|
| UBA2       | 0.074513752  | 0.426846  | 0.258795081  | 0.0056536 | 0.360130617  | 0.000118 |
| WLS        | -0.061811724 | 0.6290326 | -0.354350707 | 0.0056655 | -0.165494209 | 0.195595 |
| IFI44      | 0.766798406  | 0.0773081 | 1.197621942  | 0.0056778 | 1.184883339  | 0.005844 |
| PCNX       | 0.120417502  | 0.3986784 | 0.393905199  | 0.0056948 | 0.158208289  | 0.267305 |
| PPIAL4G    | 0.424387024  | 0.4038557 | 1.362310932  | 0.0056892 | -0.044394866 | 0.931361 |
| TMEM87A    | -0.171787799 | 0.1065589 | -0.293714104 | 0.0057155 | -0.013450281 | 0.898989 |
| TRANK1     | -0.398352335 | 0.0514088 | -0.565418059 | 0.005714  | -0.867231194 | 2.57E-05 |
| OPHN1      | -0.112092717 | 0.5476929 | 0.511291589  | 0.0057391 | 0.209233282  | 0.259876 |
| PCYT1A     | -0.154348101 | 0.1263704 | -0.277481051 | 0.0057429 | -0.256620908 | 0.010751 |
| TBC1D10B   | 0.152632006  | 0.0914488 | -0.25064158  | 0.0058215 | -0.186226825 | 0.041033 |
| PARP4      | 0.102957144  | 0.1671853 | -0.205549867 | 0.0058661 | 0.050852122  | 0.494773 |
| ECHS1      | -0.176076857 | 0.0806591 | -0.276526546 | 0.0058849 | -0.104963753 | 0.294891 |
| VIPR2      | 0.314197105  | 0.5469035 | 1.415765395  | 0.0058815 | 0.313164784  | 0.548776 |
| CORO6      | 0.745877033  | 0.1325904 | 1.343675291  | 0.0059045 | 1.448183888  | 0.003153 |
| VSTM4      | -0.01078449  | 0.9653499 | 0.667930968  | 0.0059333 | 0.232051379  | 0.343874 |
| C2orf47    | -0.041932038 | 0.8075166 | -0.475695955 | 0.0059458 | -0.604941667 | 0.000465 |
| USP19      | 0.010681492  | 0.9335083 | -0.351209501 | 0.0059523 | -0.430288132 | 0.000785 |
| ASAP1      | 0.361104671  | 0.0632767 | 0.532766249  | 0.0059869 | 0.073474609  | 0.705553 |
| RIMKLA     | -0.357175918 | 0.1931593 | -0.756686133 | 0.00599   | -0.56677243  | 0.039513 |
| ANTXR1     | 0.149288581  | 0.4576348 | 0.55011875   | 0.0060026 | 0.22769767   | 0.257066 |
| EEF1A1P6   | -0.265300623 | 0.209375  | -0.580974789 | 0.006016  | -0.196783463 | 0.350906 |
| EWSR1      | 0.172053012  | 0.0973905 | 0.28468359   | 0.0060382 | 0.367578702  | 0.000393 |
| HSPA1L     | 8.98E-05     | 0.9998966 | -1.926003107 | 0.0060438 | 0.233775788  | 0.73561  |
| PPP4R1     | 0.003057883  | 0.9771028 | 0.291514724  | 0.0060499 | 0.285055621  | 0.007243 |
| BLOC1S3    | 0.037206574  | 0.8448172 | -0.527316043 | 0.0060638 | -0.307329423 | 0.109742 |
| CSNK1G1    | -0.135825028 | 0.1693272 | -0.270431156 | 0.0060689 | -0.187224513 | 0.057425 |
| AKR1D1     | 0.041953966  | 0.9519606 | 1.789056252  | 0.0060737 | -0.095615965 | 0.890779 |
| ALAD       | -0.322638606 | 0.0705681 | -0.489058878 | 0.0060877 | -0.249140049 | 0.162085 |
| POLR3H     | -0.239295275 | 0.067759  | -0.357413973 | 0.0060862 | -0.229230098 | 0.078647 |
| HTN1       | 0.227558428  | 0.4051779 | 0.737721326  | 0.0061708 | 0.335537651  | 0.217034 |
| TRIM26     | -0.049473634 | 0.646842  | -0.295792261 | 0.0061782 | -0.137858499 | 0.201392 |
| GAS2       | 0.103065501  | 0.83763   | 1.366585163  | 0.0062028 | 0.477475471  | 0.340629 |
| NCAM2      | 0.505785575  | 0.1562324 | 0.972344388  | 0.0061982 | 0.327309341  | 0.358317 |
| ADCK3      | -0.182516994 | 0.3378024 | -0.521205973 | 0.0062302 | -0.202690623 | 0.286587 |
| ADAMTSL3   | -0.034027942 | 0.8660701 | 0.549405816  | 0.0062895 | 0.048609973  | 0.809432 |
| SLC25A14   | -0.229700102 | 0.18481   | -0.477216684 | 0.0063119 | -0.349829981 | 0.0426   |
| P11-950K24 | 1.046688662  | 0.0588669 | 1.450410964  | 0.0063483 | 1.031837819  | 0.060171 |
| SLC6A10P   | 1.074416068  | 0.0999139 | 1.680701386  | 0.0063629 | 1.503156471  | 0.01778  |
| NUB1       | 0.197796359  | 0.0528063 | 0.277494872  | 0.0064031 | 0.343965087  | 0.000709 |
| NUGGC      | 0.424262283  | 0.1257093 | 0.730276604  | 0.0064012 | 0.54087636   | 0.047026 |
| RPL9P30    | 1.085663246  | 0.1044505 | 1.732708356  | 0.0063865 | 1.501774641  | 0.020014 |
| MEOX2      | 0.579583984  | 0.4226857 | 1.951407783  | 0.0064882 | 0.71409585   | 0.322184 |
| RSRC2      | 0.091817754  | 0.5018295 | 0.370977397  | 0.0064885 | 0.402311135  | 0.003174 |
| SLC7A5     | 0.453610601  | 0.1063164 | 0.763162983  | 0.006499  | 0.907098067  | 0.001215 |
| HACE1      | -0.156828194 | 0.266278  | 0.377963634  | 0.0065229 | -0.068016082 | 0.629239 |
| MID1       | 0.24663783   | 0.2236659 | 0.546770365  | 0.006529  | 0.050033643  | 0.804444 |
| MITF       | 0.058756807  | 0.7429894 | 0.479434925  | 0.006529  | 0.040675698  | 0.819586 |

|          |              |           |              |           |              |          |
|----------|--------------|-----------|--------------|-----------|--------------|----------|
| USPL1    | -0.019944882 | 0.8428922 | -0.273690942 | 0.0065684 | -0.134928295 | 0.179306 |
| AAR2     | 0.089799751  | 0.3843805 | -0.282180957 | 0.006625  | -0.236029269 | 0.023488 |
| ENTPD7   | -0.099548909 | 0.3402587 | -0.281763894 | 0.0066244 | -0.189167172 | 0.068547 |
| GLIPR1   | 0.513719958  | 0.0984239 | 0.8428573    | 0.0066052 | 0.258838741  | 0.405101 |
| LYRM1    | 0.266377435  | 0.0922305 | 0.425833457  | 0.0065992 | 0.33398712   | 0.034358 |
| NEDD4    | 0.03403925   | 0.8528591 | 0.497896107  | 0.006614  | 0.157426265  | 0.390818 |
| ZNF564   | -0.324287782 | 0.0623102 | -0.471138156 | 0.0066162 | -0.460862961 | 0.00816  |
| PLXDC1   | -0.470780587 | 0.0754213 | -0.721523828 | 0.006677  | -0.710623196 | 0.007615 |
| KIAA2018 | -0.083515769 | 0.5810332 | -0.410563494 | 0.0066889 | -0.300758041 | 0.046975 |
| GALNT7   | -0.174999645 | 0.1886367 | -0.360167778 | 0.0067798 | 0.039660004  | 0.765077 |
| CD40     | 1.081679862  | 0.0506422 | 1.474374486  | 0.0067867 | 1.588703216  | 0.003494 |
| C9orf64  | 0.682149628  | 0.0970787 | 1.071127257  | 0.0068522 | 0.374524151  | 0.36771  |
| SHANK2   | -0.263780275 | 0.2270827 | -0.588530389 | 0.0069793 | -0.393851073 | 0.070681 |
| MSR1     | 0.35595753   | 0.4425982 | 1.232791016  | 0.0070044 | 0.483748188  | 0.299199 |
| ADO      | -0.127606086 | 0.0949133 | -0.204104552 | 0.0070508 | -0.195480989 | 0.010212 |
| AKAP5    | -0.006689872 | 0.9733866 | 0.530499919  | 0.0070471 | 0.084834898  | 0.671696 |
| FAM76B   | -0.185306007 | 0.1938427 | 0.378887921  | 0.0070793 | 0.021042474  | 0.881855 |
| IPO9     | 0.147725955  | 0.2777525 | 0.365718632  | 0.0071156 | 0.27250514   | 0.045151 |
| AFF3     | 0.033204356  | 0.8987538 | 0.697689519  | 0.0071754 | 0.025870314  | 0.921187 |
| FOXP2    | 0.266983681  | 0.3810369 | 0.818073193  | 0.0071748 | -0.136670031 | 0.654207 |
| MAPK8IP2 | 0.245486123  | 0.5501615 | 1.013923586  | 0.0072536 | -0.078685204 | 0.850833 |
| FBXO42   | -0.105904041 | 0.5081638 | -0.429440864 | 0.0073034 | -0.356194132 | 0.026557 |
| BHLHE41  | 1.147575227  | 0.0667443 | 1.666112526  | 0.0073464 | 1.314385644  | 0.03459  |
| COG5     | 0.114463753  | 0.3182233 | 0.305685325  | 0.0073379 | 0.423229564  | 0.000208 |
| EME2     | -0.159135288 | 0.2430703 | -0.364610748 | 0.0073468 | -0.369034825 | 0.006979 |
| KIAA1432 | -0.045710492 | 0.6341203 | -0.257011474 | 0.0073483 | -0.267743409 | 0.005371 |
| NTRK3    | 0.00338621   | 0.994091  | 1.194494342  | 0.007357  | 0.20451884   | 0.650587 |
| EXOC8    | -0.014173373 | 0.8579106 | -0.211629888 | 0.0073822 | -0.185156993 | 0.019549 |
| MDFIC    | 0.222675076  | 0.3481991 | 0.633556244  | 0.0073792 | 0.286845441  | 0.226079 |
| SNRPGP15 | 1.061933442  | 0.0650351 | 1.530903483  | 0.0073919 | 1.386429517  | 0.015481 |
| HOXA11   | -0.094994851 | 0.8271915 | 1.149213047  | 0.0074051 | -0.331953902 | 0.446203 |
| CCDC137  | -0.161239127 | 0.3364542 | -0.450178053 | 0.0074694 | -0.378754003 | 0.024358 |
| FGF11    | -0.011297547 | 0.9644214 | -0.679614302 | 0.0074808 | -0.685806446 | 0.007066 |
| MRPL50P2 | 1.199747619  | 0.0801832 | 1.81829223   | 0.0074753 | 1.824749199  | 0.007307 |
| GABRP    | 0.305534434  | 0.6376125 | 1.714650911  | 0.0074896 | 0.003101795  | 0.996173 |
| RAB33B   | -0.043552274 | 0.7213699 | -0.329291673 | 0.0075015 | -0.251335981 | 0.040589 |
| VPS13B   | 0.23972353   | 0.2449917 | 0.550589509  | 0.0075175 | 0.14551957   | 0.480262 |
| XRCC3    | -0.290937499 | 0.1169068 | -0.493483254 | 0.0075607 | -0.198378508 | 0.283785 |
| CSMD3    | -0.370411746 | 0.3046509 | 0.954333704  | 0.0076065 | -0.140425599 | 0.697484 |
| IARS2    | -0.058465383 | 0.5379577 | -0.253109745 | 0.0076229 | -0.008394874 | 0.929352 |
| ANXA2P1  | -1.001097406 | 0.06441   | -1.488967876 | 0.0076448 | -0.60332746  | 0.239368 |
| LITAF    | 0.35737838   | 0.0542311 | 0.494148048  | 0.0076663 | 0.295091954  | 0.111856 |
| TOX      | 0.410766741  | 0.1158155 | 0.690034378  | 0.0076679 | 0.46498649   | 0.073919 |
| FHOD3    | 0.482004066  | 0.4122647 | 1.473364593  | 0.0076756 | 0.87699848   | 0.113189 |
| PITHD1   | -0.181486947 | 0.0565734 | -0.252118104 | 0.0077132 | -0.124759938 | 0.186839 |
| DBN1     | 0.124857471  | 0.5761592 | 0.594157801  | 0.0077368 | 0.226021296  | 0.311387 |
| LRGUK    | 0.772551507  | 0.1787251 | 1.442966729  | 0.0077381 | 0.679885622  | 0.220724 |

|            |              |           |              |           |              |          |
|------------|--------------|-----------|--------------|-----------|--------------|----------|
| ZNF696     | -0.319042254 | 0.1928266 | -0.6528909   | 0.0077421 | -0.753659659 | 0.002415 |
| ELOVL5     | 0.254395047  | 0.1041722 | 0.415950681  | 0.007752  | 0.133701924  | 0.393062 |
| NCOA5      | -0.04562245  | 0.7419012 | -0.369161862 | 0.0077689 | -0.327061227 | 0.018452 |
| PARP1P1    | 0.479911417  | 0.1463241 | 0.837667749  | 0.0077704 | 0.735951877  | 0.021196 |
| CD4        | -0.293802718 | 0.3375391 | -0.833094849 | 0.0077926 | -1.289692062 | 8.42E-05 |
| AC010980.2 | 0.664454158  | 0.0912898 | 1.028051243  | 0.0078243 | 0.333569189  | 0.402961 |
| SNAPC1     | 0.185366179  | 0.2814379 | 0.449000902  | 0.0078249 | 0.71349158   | 2.16E-05 |
| ZNF330     | -0.185625441 | 0.0687086 | -0.269631624 | 0.0078485 | -0.03093238  | 0.758885 |
| FAF2       | -0.020672621 | 0.7846823 | -0.200775189 | 0.0079046 | -0.075153338 | 0.319518 |
| P11-355122 | -0.568280776 | 0.0735578 | -0.844043601 | 0.0079033 | 0.244117482  | 0.437126 |
| G6PC       | 0.290429194  | 0.6373366 | 1.457861611  | 0.0079248 | 0.40403786   | 0.495582 |
| GLTP       | 0.056286428  | 0.5908588 | 0.27471011   | 0.0079228 | 0.26350872   | 0.010876 |
| IMPDH1     | -0.325581871 | 0.0923699 | -0.513880454 | 0.007914  | -0.048414103 | 0.801989 |
| ARFGAP2    | -0.158756262 | 0.0720427 | -0.233042865 | 0.0079645 | -0.293374243 | 0.000847 |
| IRS1       | -0.137657753 | 0.3477565 | -0.389035295 | 0.0079682 | -0.455005205 | 0.001956 |
| ITGBL1     | 1.225504733  | 0.2855161 | 2.973103338  | 0.0079584 | 2.757086411  | 0.014317 |
| NR2F6      | -0.269339359 | 0.0658064 | -0.388045714 | 0.0079669 | -0.049614623 | 0.7339   |
| TDRKH      | -0.38521147  | 0.0776021 | -0.579448129 | 0.0079813 | -0.388049907 | 0.074961 |
| ZDHHC12    | -0.168489685 | 0.3027577 | -0.433888072 | 0.0079922 | -0.007157406 | 0.96464  |
| P11-402K9. | 0.957977024  | 0.0780681 | 1.405494425  | 0.0080132 | 0.619647384  | 0.258929 |
| KIAA1522   | 0.012471063  | 0.9475257 | -0.503226579 | 0.0080283 | -0.209990011 | 0.268049 |
| TRAPPC2L   | -0.132812579 | 0.2663923 | -0.315766085 | 0.0080517 | 0.054278658  | 0.645278 |
| METTL15    | -0.096604568 | 0.400151  | -0.30415288  | 0.0080872 | -0.302461575 | 0.008868 |
| NDUFA1     | -0.135991099 | 0.1243141 | -0.23249014  | 0.0080955 | 0.133665149  | 0.122927 |
| RCCD1      | -0.265077948 | 0.1347203 | -0.462350096 | 0.0080994 | -0.432090103 | 0.014155 |
| UBXN2B     | -0.068942354 | 0.4348229 | -0.232260266 | 0.0080823 | -0.058356152 | 0.506636 |
| SEC14L2    | 0.35845032   | 0.2788202 | 0.862265365  | 0.0081079 | 0.444917454  | 0.176108 |
| KLF2       | -0.644748872 | 0.0680412 | -0.933447595 | 0.008215  | 0.027702662  | 0.936087 |
| FAM117B    | -0.228469139 | 0.065287  | -0.325550365 | 0.0082274 | -0.419412772 | 0.000725 |
| SH3GL3     | 0.188564864  | 0.572029  | 0.861958981  | 0.0082566 | 0.397560431  | 0.230711 |
| SHISA2     | -0.445112504 | 0.096098  | -0.706555579 | 0.0082605 | -0.851744397 | 0.001472 |
| LCOR       | -0.124541322 | 0.3143666 | -0.326705079 | 0.0082697 | -0.125184509 | 0.311516 |
| SLC26A9    | 0.038422402  | 0.8866977 | -0.712695832 | 0.0082911 | -0.043691811 | 0.871248 |
| EML4       | 0.011995667  | 0.8678784 | 0.189605543  | 0.0083022 | 0.156796039  | 0.029217 |
| GEMIN7     | -0.098823199 | 0.4722158 | -0.363598831 | 0.0083184 | -0.215374937 | 0.116177 |
| CCT6B      | 0.173946244  | 0.5487353 | 0.734028616  | 0.0083347 | 0.524110472  | 0.060609 |
| PAOX       | 0.26792926   | 0.2703295 | -0.682748778 | 0.0083711 | 0.024368576  | 0.919883 |
| LAMP3      | 0.312696842  | 0.4139112 | 0.973689405  | 0.0083918 | 0.760107469  | 0.04062  |
| CHODL      | -0.348376774 | 0.5277273 | 1.449656681  | 0.008426  | -0.661580576 | 0.230618 |
| MOSPD2     | 0.036108034  | 0.9074817 | 0.816605463  | 0.008456  | 0.107629884  | 0.728936 |
| RDH13      | -0.18665393  | 0.2570028 | -0.429621121 | 0.0085401 | -0.069429606 | 0.668697 |
| FOXF2      | 0.182855108  | 0.5323662 | 0.764623707  | 0.0086144 | 0.075082837  | 0.797584 |
| LRRK1      | 0.357586477  | 0.4157035 | 1.150852839  | 0.0086121 | -0.053434606 | 0.903194 |
| SLC9B2     | 0.503948659  | 0.0762752 | 0.740307198  | 0.0086038 | 0.861386694  | 0.002259 |
| MISP       | -0.375880778 | 0.0528207 | -0.509553642 | 0.0086245 | -0.3366461   | 0.082562 |
| ADAMTS3    | 0.355546035  | 0.3359311 | 0.95785946   | 0.0087217 | 0.565334675  | 0.124118 |
| ARSK       | -0.347600746 | 0.0535324 | -0.468826787 | 0.0087099 | -0.627833865 | 0.000542 |

|           |              |           |              |           |              |          |
|-----------|--------------|-----------|--------------|-----------|--------------|----------|
| ATP6V0C   | 0.550357793  | 0.0656835 | 0.779960064  | 0.00871   | 0.85785192   | 0.003913 |
| CNTROB    | 0.180286891  | 0.3040135 | 0.456908846  | 0.0087245 | 0.305188919  | 0.080691 |
| YTHDF1    | 0.110039187  | 0.2338997 | -0.243099684 | 0.0087014 | -0.152293433 | 0.100335 |
| ZFAND6    | 0.177283452  | 0.2044606 | 0.363920832  | 0.0087191 | 0.591295641  | 1.95E-05 |
| SOCS2     | 0.511848532  | 0.1330139 | 0.88528188   | 0.0087721 | 0.674079532  | 0.046981 |
| USMG5     | 0.035727797  | 0.7198457 | 0.258769052  | 0.0087878 | 0.253476602  | 0.010402 |
| COLGALT2  | 0.234182881  | 0.5665218 | 1.045108768  | 0.0088368 | -0.041862445 | 0.918615 |
| FBXO30    | -0.06078576  | 0.5682803 | -0.278715369 | 0.0088382 | -0.401114255 | 0.000187 |
| ITPKB     | 0.115731459  | 0.6008472 | 0.575557478  | 0.008834  | -0.512507851 | 0.021323 |
| HSPA8P9   | 0.568239089  | 0.2924847 | 1.400548313  | 0.0088691 | 0.606660691  | 0.260148 |
| MKNK2     | 0.203017657  | 0.3173683 | -0.53219069  | 0.0088706 | -0.244714071 | 0.228509 |
| CARD10    | -0.310219564 | 0.0641249 | -0.438441793 | 0.008925  | -0.225580345 | 0.177292 |
| PAPD7     | -0.031990991 | 0.8014445 | -0.332189022 | 0.0089418 | -0.134993856 | 0.287168 |
| TFG       | -0.140571351 | 0.1596595 | -0.261037581 | 0.0089352 | -0.136102753 | 0.172743 |
| ZNF285    | -0.483090648 | 0.0560324 | -0.658667026 | 0.0089366 | -0.709619373 | 0.005134 |
| DCTN6     | -0.02792398  | 0.7329898 | 0.209585591  | 0.008959  | 0.272624434  | 0.000692 |
| RNF185    | 0.024228901  | 0.7969688 | -0.246521023 | 0.0089848 | -0.388070055 | 4.50E-05 |
| CDR2      | -0.145217176 | 0.2678117 | -0.343231819 | 0.0089987 | -0.037503337 | 0.774456 |
| C5orf30   | -0.203979345 | 0.1593661 | -0.378005925 | 0.0090053 | -0.034866204 | 0.808909 |
| ABCA6     | 0.5410823    | 0.1270089 | 0.912747557  | 0.0090474 | 0.663911533  | 0.059456 |
| PDE10A    | 0.407009674  | 0.1762459 | 0.782751598  | 0.0090757 | -0.177625284 | 0.555355 |
| ERBB2IP   | 0.161087469  | 0.2010535 | 0.328310387  | 0.0090955 | 0.425137532  | 0.000731 |
| DESI1     | 0.214859612  | 0.2494011 | 0.485289627  | 0.009103  | 0.52172202   | 0.005083 |
| C12orf76  | 0.286855191  | 0.0658875 | 0.398988342  | 0.0091491 | 0.130281966  | 0.399764 |
| FGFR2     | 0.28174921   | 0.1021231 | 0.448756441  | 0.0091471 | 0.388293094  | 0.02417  |
| POLR2D    | -0.117268388 | 0.3364215 | -0.316964486 | 0.0091737 | -0.18577204  | 0.12767  |
| REXO4     | -0.230871636 | 0.1380326 | -0.402480067 | 0.009189  | -0.334152968 | 0.030361 |
| LDOC1L    | -0.020260009 | 0.8265748 | -0.240616978 | 0.0092374 | -0.17838389  | 0.053798 |
| MARS2     | -0.232407443 | 0.2427044 | -0.5181774   | 0.0092418 | -0.540707992 | 0.006707 |
| TAX1BP1   | 0.034543864  | 0.7257707 | 0.255379385  | 0.009257  | 0.413564769  | 2.48E-05 |
| BET1L     | 0.019127994  | 0.880476  | -0.332732515 | 0.0092852 | -0.167521983 | 0.189499 |
| RFWD3     | -0.183421509 | 0.1767567 | -0.352238077 | 0.0092993 | -0.227641724 | 0.093115 |
| TAPT1     | 0.170389034  | 0.2301645 | 0.366942709  | 0.0092933 | 0.395968365  | 0.004978 |
| RAB3D     | -0.128559954 | 0.4312837 | -0.424851056 | 0.0093139 | -0.045152851 | 0.781794 |
| APOC2     | 1.075840868  | 0.2399895 | 2.348524586  | 0.0093651 | -0.675944822 | 0.470552 |
| LTBP3     | 0.04914222   | 0.8357533 | 0.612568911  | 0.0093765 | 0.116886857  | 0.621538 |
| MYCBP2    | 0.245292182  | 0.0905977 | 0.376105788  | 0.0093426 | 0.211692331  | 0.143676 |
| REXO1L1P  | -0.156083194 | 0.7577911 | 1.303438757  | 0.0093768 | -0.315179402 | 0.533525 |
| SH3YL1    | -0.175518276 | 0.1722103 | -0.333844613 | 0.0093519 | -0.141053152 | 0.272011 |
| GRIK2     | 0.253018922  | 0.4723273 | 0.905157028  | 0.0094285 | -0.062817507 | 0.858996 |
| SGK2      | -0.286940696 | 0.0984816 | -0.450261143 | 0.0094282 | -0.48596613  | 0.005118 |
| FAM134A   | -0.118924467 | 0.2651614 | -0.276106758 | 0.0094488 | -0.228882246 | 0.031844 |
| INRNPA1P3 | 0.233774259  | 0.7054957 | 1.459781988  | 0.0095126 | 0.588512829  | 0.321799 |
| SP1       | -0.057221992 | 0.5302941 | -0.236402283 | 0.0095202 | -0.263130828 | 0.00392  |
| PTPN6     | 0.040992524  | 0.822404  | -0.475803721 | 0.0095726 | 0.042300324  | 0.815608 |
| ZNF17     | -0.153855531 | 0.2303139 | -0.327268374 | 0.0095723 | -0.376904105 | 0.003372 |
| FBXO32    | 0.237747501  | 0.5622936 | 1.052742506  | 0.0095924 | -0.075614653 | 0.854117 |



|            |              |           |              |           |              |          |
|------------|--------------|-----------|--------------|-----------|--------------|----------|
| TMEM229B   | -0.293734994 | 0.245196  | -0.656170171 | 0.0095998 | -0.219231361 | 0.383941 |
| DIMT1      | 0.158616913  | 0.1665957 | 0.294298634  | 0.0096533 | 0.227311264  | 0.046154 |
| CCDC53     | 0.224123166  | 0.0872594 | 0.332342108  | 0.0096884 | 0.298857917  | 0.020803 |
| C12orf50   | 0.057548019  | 0.8540275 | 0.799004947  | 0.009714  | 0.270028428  | 0.385977 |
| P11-834C11 | -0.437872265 | 0.2286562 | -0.939369366 | 0.0097121 | -0.312326594 | 0.387433 |
| AIMP2      | 0.083705554  | 0.5345816 | 0.339270666  | 0.0097469 | 0.362086492  | 0.005959 |
| GCHFR      | -0.118923506 | 0.4360128 | -0.395601058 | 0.0097833 | 0.03445497   | 0.819429 |
| A4GNT      | 0.848832053  | 0.0869719 | 1.276308467  | 0.0098247 | 0.698799692  | 0.158831 |
| CBFA2T2    | 0.249176862  | 0.1760621 | 0.473466746  | 0.0098397 | -0.055192208 | 0.764675 |
| TFRC       | 0.204014721  | 0.244708  | 0.452530938  | 0.0098413 | 0.440242543  | 0.012033 |
| EMILIN2    | -0.301903294 | 0.2562804 | -0.695306307 | 0.0098581 | -0.269219142 | 0.311191 |
| GRIK1      | 0.353200166  | 0.4163049 | 1.047215845  | 0.0098496 | -0.26103279  | 0.561418 |
| SOCS6      | -0.109893381 | 0.2916192 | -0.267570602 | 0.0098871 | -0.231454201 | 0.025955 |
| SMU1       | 0.051967342  | 0.3429697 | 0.139168286  | 0.0099761 | 0.130905236  | 0.01582  |
| MYD88      | -0.048096227 | 0.8098933 | -0.517387425 | 0.0100218 | -0.429398732 | 0.032651 |
| 1-Sep      | -0.11146853  | 0.7761925 | 0.927107334  | 0.0100474 | 0.27860144   | 0.457376 |
| ARHGEF7    | -0.091802256 | 0.3814179 | -0.269207783 | 0.0101135 | -0.124609673 | 0.233869 |
| CYB5R1     | 0.015656085  | 0.9158049 | -0.381481875 | 0.010148  | 0.026400941  | 0.857966 |
| GALNT3     | -0.159854625 | 0.251972  | -0.358663772 | 0.0101544 | 0.09753189   | 0.483862 |
| NQO1       | -0.209958524 | 0.2331792 | -0.452560739 | 0.010171  | 0.138039732  | 0.432691 |
| PRRG2      | -0.233586545 | 0.2630259 | -0.527969708 | 0.0102079 | -0.128658768 | 0.52919  |
| PDZD8      | 0.224230811  | 0.2687322 | 0.519958513  | 0.0102215 | 0.760170753  | 0.000172 |
| ZBTB39     | -0.021553356 | 0.8532833 | -0.299720533 | 0.0102409 | -0.365432272 | 0.001878 |
| HERPUD2    | 0.191132228  | 0.2120787 | 0.390647545  | 0.0102869 | 0.494025436  | 0.001155 |
| ZNF275     | -0.068768847 | 0.5686748 | -0.309483471 | 0.0103556 | -0.326374034 | 0.007093 |
| CEP250     | -0.234678011 | 0.1327427 | -0.399686145 | 0.0103794 | -0.584112826 | 0.000185 |
| SLC14A2    | 0.336906425  | 0.2871586 | 0.780707405  | 0.0103784 | 0.07202503   | 0.821615 |
| LYRM4      | 0.153004486  | 0.2054908 | 0.305219773  | 0.010447  | 0.122804059  | 0.307868 |
| FAM101B    | 0.026612738  | 0.9234892 | 0.705795892  | 0.0104687 | -0.298618154 | 0.281877 |
| TMEM136    | 0.320885931  | 0.0830258 | 0.465915454  | 0.0104818 | 0.218765125  | 0.236483 |
| EXD2       | -0.166981826 | 0.1028841 | -0.258928907 | 0.010497  | -0.384198243 | 0.000162 |
| ZNF587B    | -0.205946751 | 0.0909512 | -0.310409383 | 0.0104998 | -0.30422234  | 0.012438 |
| GYG2P1     | -0.14593941  | 0.5731531 | 0.633002465  | 0.0105271 | -0.052816277 | 0.836336 |
| PPFIA3     | -0.017661289 | 0.9334482 | -0.541632571 | 0.0105436 | -0.270366265 | 0.202809 |
| CDH11      | 0.17971303   | 0.4069152 | 0.553535959  | 0.0105977 | 0.261394493  | 0.227636 |
| CDK10      | -0.140182566 | 0.2229611 | -0.29334024  | 0.0105965 | -0.215299431 | 0.060905 |
| P11-248J23 | 0.476141333  | 0.3790955 | 1.332019076  | 0.0105911 | 0.14695625   | 0.793792 |
| POLR1D     | -0.117865506 | 0.3535414 | -0.324449175 | 0.0106413 | -0.121207446 | 0.339704 |
| MERTK      | -0.167317488 | 0.2364194 | -0.360575457 | 0.010659  | -0.069121827 | 0.622407 |
| CELSR3     | -0.060617148 | 0.8333891 | -0.736287397 | 0.0106693 | -0.606284161 | 0.03521  |
| NOP58      | 0.202315985  | 0.0567327 | 0.270163461  | 0.0106885 | 0.282313954  | 0.007659 |
| FTO        | 0.053356101  | 0.5687048 | 0.235916288  | 0.0107051 | 0.05574865   | 0.549488 |
| MGAT1      | 0.038621854  | 0.6775925 | -0.237422897 | 0.0107111 | -0.057016337 | 0.538903 |
| BCAT2      | -0.153993675 | 0.3363878 | -0.408563357 | 0.0107527 | -0.031174789 | 0.844712 |
| GCA        | -0.038430682 | 0.8315898 | -0.462528291 | 0.0107278 | 0.040719127  | 0.821124 |
| SPATA5     | 0.037875447  | 0.7709329 | 0.327290451  | 0.0107495 | 0.115158824  | 0.372728 |
| UBE2M      | 0.162355491  | 0.1320129 | 0.273492616  | 0.0107395 | 0.091232513  | 0.397872 |

|            |              |           |              |           |              |          |
|------------|--------------|-----------|--------------|-----------|--------------|----------|
| WDR27      | -0.303393503 | 0.0547551 | -0.400013087 | 0.0107789 | -0.548573651 | 0.000524 |
| RPLP2      | 0.073781836  | 0.6055581 | -0.364377762 | 0.0107995 | -0.104540521 | 0.464347 |
| ADAMTSL1   | 0.127904671  | 0.7484823 | 1.01252057   | 0.0108103 | -0.005564971 | 0.988875 |
| ERAP2      | 0.077919273  | 0.811867  | 0.818482821  | 0.0108507 | 0.693257234  | 0.033814 |
| P3-324O17  | 0.087635365  | 0.6876761 | -0.569154362 | 0.0108942 | -0.44625177  | 0.045539 |
| ENDOV      | -0.068748365 | 0.5554539 | -0.294488398 | 0.0109296 | -0.21724444  | 0.06057  |
| NUP54      | -0.00874702  | 0.9339127 | 0.267452243  | 0.0109237 | 0.192147951  | 0.067568 |
| ABCB5      | 0.311488974  | 0.295988  | 0.714802043  | 0.0110001 | 0.052293186  | 0.861156 |
| PGPEP1     | -0.404424635 | 0.053139  | -0.531684509 | 0.0110032 | -0.573147563 | 0.006172 |
| CHRD1      | 0.859231045  | 0.0538157 | 1.127627086  | 0.0110433 | 0.452227521  | 0.311888 |
| MECOM      | -0.371935221 | 0.0819734 | -0.543321775 | 0.0110563 | -0.253923007 | 0.234754 |
| TSPAN13    | 0.000857155  | 0.9939787 | -0.288796971 | 0.0110428 | 0.197032395  | 0.081759 |
| CDC27      | -0.02569213  | 0.8613987 | 0.372741673  | 0.0111349 | 0.278082674  | 0.058438 |
| WASH3P     | -0.052074055 | 0.733465  | -0.388773042 | 0.0111758 | -0.378742169 | 0.013329 |
| CAV1       | 0.53417757   | 0.0697943 | 0.74484748   | 0.011193  | 0.41660119   | 0.15667  |
| MIEN1      | -0.12921519  | 0.3273106 | -0.333248926 | 0.0112385 | -0.091645375 | 0.483032 |
| POLR2K     | 0.005266447  | 0.9650712 | 0.300718371  | 0.0112634 | 0.293689036  | 0.013529 |
| TNFSF15    | 0.031268487  | 0.9065992 | 0.670333427  | 0.0112922 | 0.595283479  | 0.02463  |
| ZNF879     | -0.290553084 | 0.179233  | -0.544713954 | 0.0112991 | -1.034960843 | 2.61E-06 |
| ATE1       | -0.003281465 | 0.9819634 | 0.36566603   | 0.0114176 | 0.113470101  | 0.432893 |
| EPS8L1     | -0.013212803 | 0.9548378 | -0.592432326 | 0.0113909 | 0.02653726   | 0.909312 |
| ZNF45      | -0.219493287 | 0.1821697 | -0.415340088 | 0.0114155 | -0.270966983 | 0.098846 |
| NRIP3      | -0.135466882 | 0.6230159 | 0.681877603  | 0.011445  | 0.137541992  | 0.614943 |
| NEK9       | 0.178834075  | 0.3550509 | 0.487454791  | 0.0114575 | 0.094723113  | 0.62449  |
| ARHGAP5    | -0.143530755 | 0.1790801 | -0.269972398 | 0.0114653 | -0.094389668 | 0.376653 |
| BCOR       | -0.003550177 | 0.9834112 | 0.428461971  | 0.0114807 | 0.174914757  | 0.303511 |
| AGBL3      | -0.132141532 | 0.6028755 | -0.621138634 | 0.0114884 | -0.594940359 | 0.023289 |
| FICD       | -0.032412525 | 0.8741547 | -0.520037895 | 0.0115389 | -0.427050167 | 0.038898 |
| GJC2       | -0.02416705  | 0.9319477 | -0.73482898  | 0.011538  | -0.713796565 | 0.014651 |
| IP11-313J2 | 0.59566469   | 0.0633065 | 0.804806293  | 0.0115492 | 0.545049199  | 0.088746 |
| SDC2       | -0.031661863 | 0.8692407 | 0.483979612  | 0.0116185 | -0.300493228 | 0.118643 |
| CCNH       | -0.018381718 | 0.8716306 | 0.28296998   | 0.0116667 | 0.311226687  | 0.005631 |
| FAM114A2   | -0.30536689  | 0.1943194 | -0.592483752 | 0.0116705 | -0.280236393 | 0.231355 |
| XRN2       | 0.002675243  | 0.9683565 | 0.168537638  | 0.0117215 | 0.131117527  | 0.050489 |
| STK10      | 0.198702016  | 0.3436924 | 0.527661149  | 0.0117524 | 0.257715888  | 0.219403 |
| KIAA2013   | -0.125370756 | 0.3540617 | -0.340519825 | 0.0117903 | -0.273999107 | 0.042857 |
| SRRM4      | -0.14239086  | 0.8319512 | 1.544487068  | 0.0118416 | 0.444268345  | 0.492161 |
| OTX1       | -0.264097867 | 0.6327389 | -1.558960165 | 0.011869  | -0.258017975 | 0.639986 |
| NME1       | -0.025071572 | 0.8710017 | 0.386168992  | 0.0118864 | 0.303500851  | 0.048342 |
| FD-3074O7  | 0.021369327  | 0.9936336 | -7.186696094 | 0.0119143 | -2.372516314 | 0.376686 |
| GLIPR1L2   | 0.078657681  | 0.7752128 | 0.669698208  | 0.011913  | 0.043873639  | 0.872685 |
| GAN        | -0.14896125  | 0.1591213 | -0.265674525 | 0.0119289 | -0.279391703 | 0.00818  |
| DDR2       | 0.460029216  | 0.0694467 | 0.636292986  | 0.0119545 | 0.167863219  | 0.507736 |
| RPRD2      | -0.038478585 | 0.7419292 | -0.293529562 | 0.0120219 | -0.409262412 | 0.000494 |
| HDGF       | 0.232662673  | 0.0502676 | 0.298064498  | 0.01204   | 0.424095286  | 0.000353 |
| NNMT       | 0.453315728  | 0.4418894 | 1.470331133  | 0.012089  | 1.992346886  | 0.000663 |
| MYOCD      | 0.586465844  | 0.12134   | 0.946265796  | 0.0121532 | -0.455903309 | 0.230065 |

|             |              |           |              |           |              |          |
|-------------|--------------|-----------|--------------|-----------|--------------|----------|
| C7orf63     | 0.490623449  | 0.0610644 | 0.652345987  | 0.0121745 | 0.607910521  | 0.02003  |
| SEMA4G      | -0.486828369 | 0.0667347 | -0.666393923 | 0.012188  | -0.704821979 | 0.008035 |
| MLPH        | -0.061156266 | 0.8179178 | -0.666970401 | 0.0122704 | 0.387653628  | 0.143279 |
| RP4-765C7.1 | -0.051625844 | 0.8046868 | -0.524302553 | 0.0122767 | -0.290013946 | 0.165264 |
| TGM2        | 0.289265312  | 0.2131667 | 0.580304103  | 0.0122833 | 0.013372426  | 0.954127 |
| DVL1        | -0.134052882 | 0.4071145 | -0.404405744 | 0.0123206 | -0.14941046  | 0.35422  |
| C4BPA       | 0.440138794  | 0.4943452 | 1.562550671  | 0.012367  | -0.605248783 | 0.364446 |
| REEP4       | -0.281341287 | 0.0501039 | -0.354656543 | 0.0124121 | -0.366880214 | 0.009856 |
| SAG         | 0.320217673  | 0.3622122 | 0.845075725  | 0.0124558 | 0.340781257  | 0.329475 |
| PI4KAP2     | -0.11478801  | 0.3574293 | -0.311744847 | 0.0124929 | -0.270807125 | 0.03016  |
| EZH1        | 0.047798582  | 0.8024093 | 0.471157377  | 0.0125801 | -0.015202078 | 0.936451 |
| PAQR3       | 0.151138342  | 0.3098649 | 0.362620169  | 0.0126219 | -0.096334413 | 0.518905 |
| STARD5      | 0.804352177  | 0.0505397 | 1.015288959  | 0.0126325 | 0.308389415  | 0.460247 |
| ACTN1       | 0.182676628  | 0.0913328 | 0.269302743  | 0.0126757 | 0.062723961  | 0.562188 |
| ATXN7L3     | -0.093883453 | 0.3716644 | -0.262096304 | 0.0127074 | -0.242696855 | 0.020951 |
| MRAP2       | 0.084726213  | 0.7496423 | -0.668959743 | 0.0127108 | 0.504243312  | 0.055435 |
| NARS        | -0.080768556 | 0.5124703 | 0.306573793  | 0.0126908 | 0.351618803  | 0.004251 |
| AASS        | 0.261833313  | 0.2660987 | 0.582869103  | 0.0127281 | 0.099746692  | 0.671927 |
| CDH19       | 0.563141902  | 0.4645708 | 1.790696576  | 0.0127612 | 1.084974224  | 0.139703 |
| ATP2B1      | -0.00349188  | 0.9794281 | 0.336420862  | 0.0128003 | 0.145106186  | 0.283399 |
| GRPEL1      | 0.179270663  | 0.312952  | 0.440948265  | 0.0128128 | 0.264509638  | 0.135692 |
| ZNF682      | -0.363979469 | 0.0875188 | -0.5219931   | 0.01287   | -0.405542391 | 0.054841 |
| AKAP8       | -0.159304845 | 0.1252294 | -0.256965532 | 0.0129813 | -0.240847785 | 0.020226 |
| C1orf61     | 0.506831455  | 0.1285751 | 0.817349553  | 0.0129975 | 0.422492956  | 0.210853 |
| SMUG1       | -0.059005555 | 0.5822198 | -0.267312529 | 0.0129986 | -0.042434438 | 0.690956 |
| CD28        | 0.925278726  | 0.1119905 | 1.393724221  | 0.0130511 | 1.176929777  | 0.039048 |
| KIAA0020    | 0.009343425  | 0.9270457 | 0.25111891   | 0.0130451 | 0.392346538  | 0.000105 |
| METTL4      | -0.094530919 | 0.6677045 | -0.547079636 | 0.0130324 | -0.081905291 | 0.707912 |
| RNMTL1      | -0.121133022 | 0.3637377 | -0.331192086 | 0.0130446 | -0.348987417 | 0.009302 |
| EHBP1       | 0.170533115  | 0.1777384 | 0.312406797  | 0.0131031 | 0.066244762  | 0.6004   |
| ENC1        | -0.115321647 | 0.4622384 | -0.388974188 | 0.0130962 | -0.068880652 | 0.660155 |
| CD3G        | 0.586534034  | 0.1366607 | -0.98586402  | 0.0131412 | 0.922996165  | 0.018983 |
| MFAP3       | -0.061819123 | 0.6306047 | -0.318254468 | 0.0131592 | -0.223855813 | 0.081266 |
| GRHL3       | -0.683179652 | 0.1594546 | -1.210283132 | 0.0131917 | -0.449319859 | 0.351699 |
| USP39       | -0.09269931  | 0.5616674 | 0.393961146  | 0.0131845 | 0.108636802  | 0.495643 |
| ARPP19      | 0.048455071  | 0.6467864 | 0.261665071  | 0.0132236 | 0.233891425  | 0.026804 |
| LRP8        | -0.031400041 | 0.9090006 | 0.675178266  | 0.0132901 | 0.440079043  | 0.107148 |
| MCAM        | 0.413779097  | 0.0782915 | 0.575562285  | 0.0132693 | 0.376641308  | 0.107018 |
| FAM160A2    | 0.069790795  | 0.6664061 | -0.401373171 | 0.0132981 | -0.26113352  | 0.107066 |
| FGG         | 0.248602058  | 0.8522167 | 3.092308937  | 0.0133885 | -0.100754024 | 0.939984 |
| CASP9       | -0.296712091 | 0.163092  | -0.527120708 | 0.0134196 | -0.370227829 | 0.082147 |
| CTSD        | 0.23133499   | 0.1196466 | 0.36701032   | 0.0134414 | 0.266130601  | 0.0732   |
| MCOLN2      | -0.342478146 | 0.3968075 | 0.94880664   | 0.0134543 | 0.212664918  | 0.596925 |
| RGMB        | -0.320280017 | 0.0818024 | -0.453818941 | 0.0134577 | -0.358773522 | 0.051003 |
| P11-15H20.1 | -0.37051133  | 0.0619645 | -0.488248155 | 0.0134566 | -0.536360316 | 0.007066 |
| PHF12       | -0.107302499 | 0.5028575 | -0.393694168 | 0.013687  | -0.529852168 | 0.000954 |
| TARS        | 0.052501655  | 0.6872482 | 0.321062089  | 0.0136981 | 0.492213277  | 0.000157 |

|            |              |           |              |           |              |          |
|------------|--------------|-----------|--------------|-----------|--------------|----------|
| ANKRD44    | 0.443676592  | 0.1643063 | 0.783329692  | 0.0137425 | 0.86316923   | 0.006775 |
| DAPK2      | 0.616110447  | 0.0883726 | 0.878469563  | 0.0137512 | 0.525247519  | 0.14576  |
| UGGT1      | -0.189315818 | 0.0573492 | -0.24511544  | 0.0137214 | 0.014926351  | 0.880673 |
| PRMT3      | 0.020321587  | 0.88123   | 0.327276041  | 0.0137706 | 0.368647636  | 0.005555 |
| ZNF852     | -0.433241715 | 0.1189918 | -0.675198315 | 0.0138147 | -0.704511947 | 0.012398 |
| AC002543.2 | 0.633733285  | 0.1362647 | 1.000625369  | 0.0138408 | 0.664721582  | 0.112974 |
| ANO1       | 0.494224943  | 0.1005749 | 0.739275818  | 0.0138703 | 0.740632007  | 0.013748 |
| FBXL6      | 0.070564324  | 0.7064516 | -0.466212511 | 0.0138933 | -0.239080596 | 0.20868  |
| GALK2      | -0.26835155  | 0.0648842 | -0.35627719  | 0.0139338 | -0.392256461 | 0.006897 |
| TEX15      | 0.030029375  | 0.9435465 | 1.020425704  | 0.0139842 | 0.128401715  | 0.762183 |
| ZFX        | -0.114015679 | 0.1162436 | -0.177766122 | 0.0140157 | -0.254514503 | 0.000449 |
| FOXA1      | -0.083388474 | 0.7120879 | -0.555358137 | 0.0140293 | -0.188451875 | 0.404006 |
| INTS5      | -0.053226734 | 0.6940845 | -0.33295487  | 0.0140323 | -0.165813553 | 0.219963 |
| DNAH7      | -0.576895512 | 0.1006336 | -0.849179151 | 0.0140924 | -0.453033946 | 0.191702 |
| ENPP1      | 0.308603145  | 0.1674306 | 0.544799481  | 0.0141357 | 0.634936109  | 0.004252 |
| KIT        | 0.189366438  | 0.4856629 | 0.662280278  | 0.0141283 | -0.022355212 | 0.934446 |
| LPXN       | 0.321575143  | 0.1742847 | 0.557458152  | 0.0141251 | 0.261748681  | 0.266607 |
| RPUSD1     | -0.119553376 | 0.4894192 | -0.424581678 | 0.0141292 | -0.353615783 | 0.041009 |
| STARD8     | 0.313824038  | 0.1902611 | 0.58290349   | 0.014099  | 0.300519281  | 0.208194 |
| ZNF431     | -0.100098478 | 0.3081    | -0.239815419 | 0.0141344 | -0.227289987 | 0.020284 |
| RBM15      | -0.200289947 | 0.1031785 | -0.300355267 | 0.0141496 | -0.25068978  | 0.040852 |
| MT1H       | 0.880143385  | 0.5514489 | 3.580177743  | 0.0142159 | 0.31968085   | 0.829766 |
| CANT1      | -0.165733067 | 0.3311218 | -0.417690802 | 0.0142513 | -0.168484848 | 0.321831 |
| MAX        | 0.153584518  | 0.1894824 | 0.284947031  | 0.0142533 | 0.271848447  | 0.019694 |
| ZNF202     | -0.254042906 | 0.1238887 | -0.404268416 | 0.0142333 | -0.256921307 | 0.118772 |
| ZNF558     | -0.087311593 | 0.4660293 | -0.293246454 | 0.0142434 | -0.360111887 | 0.002734 |
| AGMO       | 0.220335136  | 0.7978444 | 2.035009797  | 0.0143646 | 1.338465516  | 0.108379 |
| BLMH       | 0.036619337  | 0.8130563 | 0.37457323   | 0.0144805 | 0.185700398  | 0.228083 |
| ITM2B      | 0.188486456  | 0.125686  | 0.300597969  | 0.0145017 | 0.346045493  | 0.004895 |
| PDE5A      | 0.064813767  | 0.7631447 | 0.525542033  | 0.0144857 | -0.249475853 | 0.246159 |
| ERMP1      | -0.120197381 | 0.2773051 | -0.270154449 | 0.0145243 | -0.112321185 | 0.309012 |
| SKAP2      | -0.142201033 | 0.5169292 | -0.53716492  | 0.0145476 | -0.371557517 | 0.090245 |
| ZNF543     | 0.045735733  | 0.7467258 | -0.349647842 | 0.0145559 | -0.33148786  | 0.021263 |
| HOXC8      | -0.050986481 | 0.9003961 | -1.023460423 | 0.0145791 | -0.243493949 | 0.550642 |
| ODC1       | 0.017422802  | 0.9138451 | 0.391709844  | 0.0146274 | 0.301609384  | 0.060382 |
| RABIF      | -0.011675136 | 0.9187665 | -0.279723042 | 0.014747  | -0.000550361 | 0.996128 |
| POTEC      | -0.109057839 | 0.7665938 | 0.853887188  | 0.0147975 | 0.077637167  | 0.829892 |
| YAF2       | 0.04837954   | 0.7775725 | 0.411905431  | 0.0148203 | 0.23103259   | 0.174454 |
| TBC1D12    | 0.16012441   | 0.3266057 | 0.395478088  | 0.0148682 | 0.1252567    | 0.44049  |
| ALDH1L1    | 0.091927865  | 0.8169186 | 0.948784798  | 0.0150281 | -0.348313212 | 0.390055 |
| OPRM1      | 0.766026858  | 0.0906105 | 1.067844493  | 0.0150117 | 0.439190462  | 0.343856 |
| TA-246H3.1 | -0.588329951 | 0.1768852 | -1.09428391  | 0.0150573 | -0.330725097 | 0.429116 |
| ENTPD5     | -0.2214415   | 0.1437568 | -0.367914701 | 0.0151446 | -0.299460887 | 0.048079 |
| INRNPA1P2  | 0.102983199  | 0.7701148 | 0.793097296  | 0.0152215 | -0.609200929 | 0.106237 |
| TLE1       | 0.25017593   | 0.1055168 | 0.373909298  | 0.0152297 | 0.326823672  | 0.034312 |
| DPT        | 0.275004151  | 0.7193526 | 1.772761986  | 0.0152554 | 0.802141716  | 0.283012 |
| TUBA1B     | 0.121580247  | 0.407729  | 0.356131674  | 0.0152847 | 0.353037164  | 0.016199 |

|           |              |           |              |           |              |          |
|-----------|--------------|-----------|--------------|-----------|--------------|----------|
| SSH3      | 0.083084377  | 0.6557996 | -0.453187684 | 0.0153134 | -0.070870233 | 0.703244 |
| ZNF736    | 0.165290833  | 0.8069877 | 1.529574783  | 0.0153359 | 0.722258348  | 0.25673  |
| CCDC141   | -0.916139099 | 0.0570789 | -1.162626473 | 0.0153514 | -0.693316632 | 0.148496 |
| MRPL17    | -0.225670453 | 0.1457193 | -0.375253507 | 0.0153639 | -0.167685352 | 0.278204 |
| C2CD5     | -0.264564035 | 0.0895202 | -0.376456911 | 0.0154608 | -0.001267113 | 0.993488 |
| RPL13A    | -0.015838157 | 0.8975375 | -0.297794128 | 0.0154773 | -0.022632479 | 0.853977 |
| CAPN13    | 0.377061714  | 0.1369023 | -0.626586914 | 0.015509  | 0.739262049  | 0.003369 |
| HMBOX1    | -0.107576451 | 0.4717599 | -0.361471593 | 0.0154964 | -0.244686731 | 0.101529 |
| RPA3      | -0.296159699 | 0.0813648 | -0.404866875 | 0.0156585 | -0.110242214 | 0.510238 |
| CXCR4     | 0.351878066  | 0.3375885 | 0.88298887   | 0.015698  | 1.447602296  | 7.29E-05 |
| NANOGP1   | 0.904041129  | 0.0525619 | 1.099642669  | 0.0156995 | 0.945344532  | 0.040443 |
| CLASP2    | -0.036662713 | 0.7703948 | 0.301456634  | 0.0157097 | 0.248062457  | 0.047004 |
| RSU1      | 0.145373462  | 0.2225253 | 0.285640808  | 0.0157752 | 0.414273157  | 0.00046  |
| FBXO44    | -0.197873215 | 0.2850744 | -0.443350981 | 0.0158084 | -0.623206969 | 0.00081  |
| ATAT1     | 0.133491663  | 0.3567445 | -0.355186356 | 0.0158417 | -0.30009156  | 0.045699 |
| SERPINA1  | 0.075609636  | 0.8128296 | 0.770398816  | 0.015829  | 0.047287995  | 0.882273 |
| NDUFA8    | -0.064990356 | 0.5507158 | -0.261963647 | 0.0158697 | -0.200857587 | 0.065106 |
| DEGS1     | 0.11929661   | 0.4515171 | 0.379763591  | 0.0159382 | 0.039418058  | 0.803418 |
| PRELID1   | 0.071635467  | 0.6928553 | 0.436311921  | 0.0159107 | 0.273982071  | 0.130324 |
| TEF       | -0.161356752 | 0.5186409 | -0.603165974 | 0.0159231 | -0.458585745 | 0.06664  |
| TMPPE     | 0.019046189  | 0.9140219 | -0.431876132 | 0.0159194 | -0.140096791 | 0.427762 |
| PVRL4     | -0.186295654 | 0.5472325 | -0.748056332 | 0.015998  | 0.427481027  | 0.163685 |
| COL8A1    | 0.730468533  | 0.0893261 | 1.029705702  | 0.0161271 | 1.130115138  | 0.008156 |
| C9orf142  | -0.245355803 | 0.2062266 | -0.465413193 | 0.0161771 | -0.250123064 | 0.194725 |
| LAMTOR3   | 0.038093682  | 0.6940156 | 0.231049067  | 0.016197  | 0.33331579   | 0.000528 |
| SEPT7P6   | 0.692345648  | 0.3132027 | 1.520019313  | 0.0162023 | 1.731241351  | 0.005858 |
| C1orf51   | 0.276594675  | 0.1937618 | 0.49435231   | 0.0162174 | 0.444587049  | 0.033467 |
| SHC4      | -0.302056379 | 0.2648541 | 0.629320873  | 0.0162469 | 0.358385175  | 0.175548 |
| CLDN23    | -0.159291666 | 0.5220397 | -0.601876116 | 0.0162903 | 0.287104656  | 0.241177 |
| FAM126B   | 0.196346299  | 0.1447522 | 0.322441126  | 0.0162948 | 0.384364874  | 0.004207 |
| RPE       | -0.13318436  | 0.189174  | -0.242007559 | 0.0162809 | 0.0077858    | 0.938249 |
| PSPH      | -0.233172483 | 0.0991245 | -0.33999786  | 0.0163056 | -0.294432217 | 0.037693 |
| AKAP2     | 0.351347868  | 0.1171984 | 0.537915223  | 0.0163307 | 0.200717588  | 0.370812 |
| MUC13     | 1.165852458  | 0.2582688 | 2.469465839  | 0.0163498 | 0.958268854  | 0.35287  |
| ROCK1P1   | 0.718486873  | 0.2508074 | 1.479792409  | 0.0163709 | 0.194287574  | 0.754335 |
| MC1R      | 0.134239255  | 0.4697671 | -0.456031659 | 0.0163923 | -0.469530505 | 0.014209 |
| NUDT12    | -0.234369473 | 0.0542186 | -0.289937075 | 0.0164814 | -0.092791077 | 0.442569 |
| P11-266K4 | 0.212629189  | 0.7427951 | 1.44360642   | 0.0165019 | 0.438553737  | 0.489226 |
| GARS      | 0.260456773  | 0.0730289 | 0.347823403  | 0.0165377 | 0.624793661  | 1.65E-05 |
| NTRK2     | 0.601876782  | 0.2891666 | 1.351209423  | 0.0165624 | 0.230445957  | 0.685833 |
| ASRGL1    | 0.456243908  | 0.0520768 | 0.55968436   | 0.0166107 | 0.082859379  | 0.725777 |
| FAM73B    | 0.017983428  | 0.9328493 | -0.510352277 | 0.0166076 | -0.521088111 | 0.015041 |
| CHCHD3    | -0.10718417  | 0.2953521 | 0.242289211  | 0.016645  | 0.209981255  | 0.038415 |
| DPH7      | -0.196050483 | 0.2110275 | -0.369506093 | 0.016763  | -0.410266127 | 0.008472 |
| SLC1A2    | 0.64589416   | 0.2133172 | 1.202320578  | 0.0167736 | 1.454874311  | 0.004301 |
| EPHB6     | 0.997932412  | 0.244109  | 1.979931707  | 0.0167948 | 1.750871502  | 0.036691 |
| TOX3      | 0.148271394  | 0.4546351 | -0.475154311 | 0.0168021 | -0.072523575 | 0.714726 |

|           |              |           |              |           |               |          |
|-----------|--------------|-----------|--------------|-----------|---------------|----------|
| NUP98     | 0.206404409  | 0.0537383 | 0.255470335  | 0.0168695 | 0.299023481   | 0.005156 |
| MSRA      | 0.029552578  | 0.872546  | 0.42113991   | 0.0169119 | 0.393529066   | 0.027646 |
| SLC20A2   | 0.017959422  | 0.8716295 | 0.262745865  | 0.0169053 | 0.125525587   | 0.25571  |
| ZNF444    | -0.139420034 | 0.4272586 | -0.417124982 | 0.0169079 | -0.28753783   | 0.103165 |
| ZNF582    | -0.175821514 | 0.4447438 | -0.557990345 | 0.0169477 | -0.710366082  | 0.002237 |
| C12orf55  | -0.145008256 | 0.5481586 | 0.57415699   | 0.0170001 | 0.056424556   | 0.814939 |
| NUP107    | -0.033772484 | 0.7691782 | 0.272624212  | 0.0170257 | 0.181230053   | 0.113233 |
| FAM177B   | -0.068708673 | 0.8473834 | -0.857664372 | 0.017091  | 0.255237979   | 0.472321 |
| GLT8D1    | -0.206722186 | 0.0914268 | -0.291280079 | 0.0171154 | -0.183314665  | 0.13387  |
| GTPBP8    | -0.222751748 | 0.093936  | -0.314821089 | 0.0171423 | -0.041146832  | 0.75373  |
| DDX25     | 0.072352869  | 0.8454172 | 0.864635876  | 0.0172339 | 0.1044907     | 0.783937 |
| MTMR8     | -0.173289277 | 0.4844364 | -0.593637866 | 0.0173074 | -0.031393138  | 0.897638 |
| PNPLA1    | -0.194177875 | 0.7320311 | 1.176821534  | 0.0173245 | 0.071551868   | 0.894962 |
| EDN3      | 0.101455735  | 0.7942488 | 0.923287034  | 0.0173487 | -0.4111111706 | 0.291496 |
| FOXP1     | -0.095207498 | 0.4638287 | 0.307596066  | 0.017418  | 0.277695608   | 0.03191  |
| SH3D21    | -0.308369632 | 0.1683815 | -0.53220639  | 0.0174379 | -0.415242498  | 0.064443 |
| KIAA0232  | -0.099231402 | 0.3327589 | -0.243342296 | 0.0174713 | -0.237523855  | 0.020443 |
| UBASH3B   | 0.209095744  | 0.6022977 | 0.9480363    | 0.0174631 | 0.464457368   | 0.245326 |
| EPB41L4A  | -0.026403281 | 0.9099152 | 0.543423335  | 0.0174918 | 0.185594877   | 0.420222 |
| ZNF507    | -0.242738383 | 0.1158827 | -0.365365577 | 0.0175026 | -0.327737856  | 0.033519 |
| MYLK      | 0.530001557  | 0.10585   | 0.778007516  | 0.0175431 | -0.080887491  | 0.805131 |
| PINX1     | -0.210392951 | 0.1887679 | 0.368599332  | 0.0175455 | 0.163474551   | 0.295768 |
| ACTA2     | 0.329436378  | 0.2039147 | 0.615578406  | 0.0175642 | 0.11766708    | 0.65     |
| PITPNA    | 0.09589661   | 0.3797838 | 0.258159013  | 0.0175864 | 0.079402659   | 0.466463 |
| 3PR75-ASB | -0.051714961 | 0.7085525 | 0.325893427  | 0.0176253 | -0.030194171  | 0.826733 |
| SGTB      | 0.081174183  | 0.6150815 | 0.375690842  | 0.0176214 | -0.252580938  | 0.117171 |
| ZBTB48    | -0.126699195 | 0.5329818 | -0.484414834 | 0.0176128 | -0.300997138  | 0.140505 |
| TMEM216   | -0.042834262 | 0.7826316 | -0.369228455 | 0.0176846 | -0.265435395  | 0.090404 |
| GMPPB     | -0.012593809 | 0.9325469 | -0.353567841 | 0.0177014 | -0.064732337  | 0.663482 |
| MON1B     | 0.022339309  | 0.8134994 | -0.223805927 | 0.0177308 | 0.025464692   | 0.786828 |
| DPM3      | -0.210833874 | 0.2680203 | -0.450965401 | 0.0177681 | -0.065735818  | 0.726234 |
| RASAL2    | -0.151349898 | 0.2742639 | 0.324805159  | 0.0178078 | 0.277978541   | 0.043213 |
| SH3BGRL2  | -0.113159252 | 0.4365497 | -0.344589641 | 0.0178203 | 0.279630182   | 0.054098 |
| TWIST1    | 0.238224699  | 0.6133857 | 1.094680371  | 0.0178508 | 0.170455569   | 0.716428 |
| FAM109A   | -0.197963014 | 0.1983747 | -0.361615453 | 0.0179004 | -0.081473105  | 0.591109 |
| NIPAL3    | 0.055468069  | 0.6262755 | -0.270760525 | 0.0179258 | -0.217884466  | 0.057889 |
| NKX6-2    | -0.4665186   | 0.3703612 | -1.236039069 | 0.0179282 | -0.197540184  | 0.704033 |
| SHE       | 0.578228654  | 0.1772709 | 0.974807392  | 0.0179617 | 0.340027843   | 0.42304  |
| OCLN      | -0.136544299 | 0.5192497 | -0.50105117  | 0.0180782 | -0.112987833  | 0.593539 |
| PDE3B     | -0.31991801  | 0.1898245 | 0.573559379  | 0.0181302 | -0.420781353  | 0.084514 |
| UGT1A6    | 1.149297613  | 0.1097729 | 1.652720066  | 0.0181368 | 1.141293053   | 0.103646 |
| EGFL6     | 2.453253905  | 0.0668341 | 3.144862701  | 0.0181977 | 3.622678585   | 0.006449 |
| PDPK1     | -0.124969035 | 0.3579496 | -0.320786513 | 0.0182899 | -0.217811703  | 0.109227 |
| LIPT1     | -0.034930008 | 0.8687834 | -0.508920153 | 0.0183598 | -0.04079229   | 0.847273 |
| TMEM87B   | -0.173963058 | 0.1421389 | -0.278857594 | 0.0183569 | 0.031878799   | 0.787094 |
| CYB561    | -0.129127474 | 0.4865597 | -0.437987098 | 0.0184294 | 0.158675456   | 0.389255 |
| TRAK2     | -0.141209655 | 0.1507705 | -0.230250672 | 0.0184566 | -0.143409762  | 0.142466 |

|            |              |           |              |           |              |          |
|------------|--------------|-----------|--------------|-----------|--------------|----------|
| PUSL1      | -0.135094829 | 0.4732321 | -0.445580275 | 0.0184969 | -0.092544991 | 0.619703 |
| NUTF2      | 0.065635772  | 0.5312462 | 0.245752311  | 0.0185277 | 0.26927271   | 0.009922 |
| TCP1       | 0.114813979  | 0.2080026 | 0.214235374  | 0.0185398 | 0.244561449  | 0.007195 |
| SLC29A2    | -0.103680454 | 0.5318603 | -0.390690768 | 0.0185666 | -0.102018694 | 0.537607 |
| HMHA1      | -0.219808801 | 0.2498003 | -0.450000771 | 0.0186022 | -0.675295405 | 0.000451 |
| VEZT       | 0.093412237  | 0.3319105 | 0.225734345  | 0.0186011 | 0.345842761  | 0.000308 |
| UPF1       | -0.239970814 | 0.1226379 | -0.365419023 | 0.0186418 | -0.454037924 | 0.003503 |
| NDUFB1     | -0.058016192 | 0.6134314 | 0.265529359  | 0.018653  | 0.282941079  | 0.012455 |
| CDH7       | 0.147954184  | 0.745922  | 1.067105086  | 0.0187252 | -0.271291344 | 0.554974 |
| TACR2      | 1.267970848  | 0.179175  | 2.128695984  | 0.0187264 | 2.39474936   | 0.007923 |
| SCRN2      | -0.234538185 | 0.1600628 | -0.390357122 | 0.0188009 | -0.202779459 | 0.22256  |
| SPECC1     | 0.230299471  | 0.1420311 | 0.368028358  | 0.0188298 | 0.330583435  | 0.034881 |
| TAF5L      | 0.074516592  | 0.3992211 | -0.208031865 | 0.018839  | -0.066219798 | 0.454196 |
| C17orf59   | -0.390044164 | 0.1226258 | -0.592016423 | 0.0188613 | -0.907828627 | 0.00046  |
| ALX3       | -0.478136801 | 0.0630966 | -0.595278712 | 0.0189165 | -0.461073983 | 0.067911 |
| CNPY3      | 0.011929772  | 0.9024652 | -0.228369575 | 0.0189956 | -0.044221391 | 0.648224 |
| CYTL1      | 0.091762155  | 0.7921148 | 0.810086732  | 0.0189707 | 0.121826615  | 0.725895 |
| FOXF1      | 0.222296167  | 0.3817213 | 0.594940274  | 0.01896   | -0.039026558 | 0.878016 |
| ZNF175     | -0.395873594 | 0.2262051 | -0.75804946  | 0.0189954 | -0.653368223 | 0.04504  |
| WDR52      | -0.368361476 | 0.0618571 | -0.462107779 | 0.0190792 | -0.179207993 | 0.362456 |
| CDC42EP4   | 0.010245086  | 0.9246996 | -0.254109737 | 0.0191572 | -0.167566867 | 0.122468 |
| PTPN23     | -0.29348282  | 0.235597  | -0.580685769 | 0.0191408 | -0.18167207  | 0.463504 |
| TUBGCP4    | -0.082492013 | 0.5639259 | -0.334144176 | 0.0191569 | -0.337606002 | 0.018684 |
| BRWD3      | -0.118152652 | 0.3759038 | -0.3123837   | 0.0192091 | -0.289418203 | 0.030177 |
| WSCD1      | 0.283613003  | 0.224529  | 0.536752048  | 0.0192271 | -0.138888819 | 0.561199 |
| NANP       | -0.159354657 | 0.2664081 | -0.334886387 | 0.0192526 | -0.145345    | 0.308251 |
| TFCP2L1    | 0.063082677  | 0.8488262 | -0.776071698 | 0.0192915 | 0.2584852    | 0.43332  |
| KANK2      | 0.162461513  | 0.4542123 | 0.507245398  | 0.0193077 | -0.110349823 | 0.6115   |
| TXNDC12    | 0.012291778  | 0.9192228 | -0.283034202 | 0.0193145 | -0.132784519 | 0.27219  |
| RLIMP1     | 0.895599104  | 0.1104677 | 1.263576156  | 0.019336  | 0.997381031  | 0.070716 |
| ZNF589     | -0.319429417 | 0.0702804 | -0.407954974 | 0.0194244 | -0.376391129 | 0.031588 |
| KCNS3      | -0.051169981 | 0.7806018 | -0.431032067 | 0.0194595 | 0.267195971  | 0.141243 |
| TMEM125    | -0.268903321 | 0.3385458 | -0.657191626 | 0.0194758 | -0.256368626 | 0.361068 |
| PBOV1      | 0.494610048  | 0.2183678 | 0.903379635  | 0.0195067 | 1.171243077  | 0.002271 |
| C7orf31    | -0.23961787  | 0.2351811 | -0.46781819  | 0.0195295 | -0.237852029 | 0.230569 |
| CDKN1C     | -0.283720908 | 0.134814  | -0.442552155 | 0.0195445 | -0.746750718 | 9.25E-05 |
| P11-169L17 | 0.108891579  | 0.7760418 | 0.838955981  | 0.0195424 | 0.249494504  | 0.505272 |
| ZNF765     | -0.216711567 | 0.1851802 | -0.381705095 | 0.0195587 | -0.308065582 | 0.059857 |
| C8orf47    | 0.044860668  | 0.8950643 | -0.814495922 | 0.0196451 | 0.399038626  | 0.229755 |
| SNRPGP18   | -0.28996816  | 0.6963567 | 1.463219543  | 0.0196383 | 0.794073748  | 0.226416 |
| CBWD3      | 0.355308483  | 0.0584471 | 0.433318357  | 0.0197103 | 0.325882142  | 0.081867 |
| 3ABARAPL   | -0.064441944 | 0.5431477 | -0.246053087 | 0.0197407 | -0.10298835  | 0.329133 |
| STX12      | 0.219610084  | 0.0505986 | 0.261040295  | 0.0197623 | 0.325784143  | 0.00359  |
| CNR2       | -0.274545417 | 0.4016162 | 0.68566311   | 0.019802  | 0.015303446  | 0.960974 |
| AP002387.1 | 0.002843049  | 0.9955308 | 1.099923553  | 0.0198709 | 0.669341103  | 0.16154  |
| LPGAT1     | 0.174943307  | 0.1135223 | 0.256653125  | 0.0199007 | 0.163946122  | 0.137536 |
| PAQR7      | -0.294276722 | 0.0507507 | -0.347557322 | 0.0199083 | -0.411811171 | 0.006199 |

|            |              |           |              |           |              |          |
|------------|--------------|-----------|--------------|-----------|--------------|----------|
| KCNQ5      | 0.763364032  | 0.4910669 | 2.485024534  | 0.0199538 | -0.561879711 | 0.624247 |
| OST4       | 0.250496589  | 0.0517213 | 0.299019311  | 0.0199574 | 0.344856683  | 0.007292 |
| ZNF772     | -0.288365421 | 0.0924615 | -0.397777128 | 0.0200094 | -0.519435991 | 0.002495 |
| ALDH18A1   | -0.14136242  | 0.317174  | -0.328580694 | 0.0200625 | -0.180389615 | 0.20171  |
| ANKMY2     | -0.059185049 | 0.5743772 | -0.244652568 | 0.0200628 | -0.066238663 | 0.528182 |
| P11-84C13. | -0.289011744 | 0.0670712 | -0.365371162 | 0.020055  | -0.332838559 | 0.034458 |
| SH3BP5L    | -0.118548282 | 0.2115871 | -0.219882582 | 0.0200294 | -0.257368677 | 0.006674 |
| NCLN       | -0.158518089 | 0.1958281 | -0.284599108 | 0.0201105 | -0.145587034 | 0.234294 |
| PROSC      | -0.140107429 | 0.2144726 | -0.261050185 | 0.0201201 | -0.137216105 | 0.222544 |
| CLIP1      | 0.117384006  | 0.2159801 | 0.218678581  | 0.02016   | 0.32109036   | 0.000636 |
| UBE2G2     | 0.131940994  | 0.1494219 | 0.210488491  | 0.0202051 | 0.207023042  | 0.022541 |
| CCDC160    | 1.053540467  | 0.0623751 | 1.271633364  | 0.0202435 | 0.723321933  | 0.207989 |
| AP1S2      | -0.1149304   | 0.5957466 | 0.499488223  | 0.0203199 | -0.130389303 | 0.546893 |
| FABP2      | 0.318986783  | 0.6505214 | 1.628520067  | 0.020358  | -1.171051647 | 0.098554 |
| RPL41      | -0.018626156 | 0.8441753 | -0.219769289 | 0.0203765 | -0.013017428 | 0.890719 |
| PRSS27     | 0.122016987  | 0.713488  | 0.730406282  | 0.0204592 | 0.13329593   | 0.682913 |
| RGL2       | 0.051214942  | 0.6176326 | -0.238223253 | 0.0205501 | -0.198378727 | 0.053453 |
| SMOC1      | -0.445968017 | 0.5762496 | 1.600835938  | 0.0205373 | -0.027882683 | 0.9696   |
| ZDHHC7     | -0.162361939 | 0.2366067 | -0.317414687 | 0.0205435 | -0.143550875 | 0.294611 |
| C4orf3     | -0.107313126 | 0.2741017 | -0.226816624 | 0.020583  | -0.124561112 | 0.203525 |
| C4orf32    | 0.000314468  | 0.9987104 | 0.449366405  | 0.0206709 | 0.237898573  | 0.220898 |
| MOB3A      | 0.183637915  | 0.2325879 | -0.359587468 | 0.0206675 | -0.433944916 | 0.005511 |
| UBTD2      | 0.145772933  | 0.0978291 | 0.202213871  | 0.0206859 | 0.217004658  | 0.013208 |
| ZDHHC8P1   | -0.247550678 | 0.5059803 | -0.860849389 | 0.0207595 | -1.607516443 | 6.35E-05 |
| DDX46      | 0.193958035  | 0.108883  | 0.279030662  | 0.0208088 | 0.263402592  | 0.029124 |
| CACNB2     | 0.392153018  | 0.2316732 | 0.750805015  | 0.0208385 | -0.360800015 | 0.277176 |
| IRAK1BP1   | -0.210376284 | 0.3484537 | 0.505098076  | 0.0208674 | -0.03598326  | 0.87152  |
| DENND4B    | -0.163823508 | 0.3211923 | -0.381222421 | 0.0209774 | -0.315495485 | 0.056358 |
| KCTD6      | -0.232515602 | 0.1524864 | -0.370445787 | 0.0209821 | -0.44314451  | 0.006693 |
| MKRN2      | -0.087521364 | 0.3680374 | -0.223144825 | 0.0210188 | -0.118837726 | 0.219086 |
| NONO       | 0.112287237  | 0.5247122 | 0.407273149  | 0.0210148 | 0.234861403  | 0.183316 |
| PKP2       | -0.279824681 | 0.0652984 | -0.349550706 | 0.021037  | -0.285437743 | 0.059403 |
| PURB       | 0.12269042   | 0.1926047 | 0.216022266  | 0.0210468 | 0.140559382  | 0.13439  |
| RCAN3      | -0.195077438 | 0.4013028 | -0.536659295 | 0.0210407 | -0.032086634 | 0.890022 |
| TMEM141    | -0.155731581 | 0.3302786 | -0.369068197 | 0.0210023 | -0.076968266 | 0.629812 |
| SIGLEC10   | 0.119625322  | 0.6740267 | 0.624392641  | 0.0212745 | 0.379566396  | 0.170666 |
| CC1L-ADOF  | 0.38117477   | 0.2376256 | 0.733778794  | 0.0212753 | 0.557584183  | 0.08174  |
| MYZAP      | -0.268111537 | 0.1501076 | -0.427888962 | 0.021324  | -0.319508519 | 0.08542  |
| DCBLD2     | -0.083323094 | 0.5707748 | 0.337582338  | 0.0213435 | 0.031281793  | 0.831292 |
| N4BP2L1    | -0.341951433 | 0.2950049 | 0.704070818  | 0.0213623 | -0.299716508 | 0.348503 |
| FPR1       | -0.257386614 | 0.6447814 | 1.152104681  | 0.0214339 | 0.030263185  | 0.954186 |
| ARHGDI1A   | 0.217643793  | 0.2341544 | -0.421756646 | 0.0214657 | -0.369941364 | 0.04366  |
| TBRG4      | 0.019817491  | 0.8561038 | -0.250835208 | 0.0215218 | -0.058924737 | 0.589078 |
| FAM13A     | 0.07202439   | 0.7713732 | 0.568727766  | 0.0215777 | 1.140371483  | 3.97E-06 |
| ACSL6      | 0.176863065  | 0.7035416 | 1.022710696  | 0.0215991 | -0.311476124 | 0.515518 |
| GTF2E2     | -0.024522704 | 0.8526376 | 0.301089696  | 0.0215952 | 0.213385071  | 0.104101 |
| CCDC120    | -0.068936973 | 0.7543139 | -0.511705722 | 0.0216542 | -0.294715397 | 0.184057 |



|            |              |           |              |           |              |          |
|------------|--------------|-----------|--------------|-----------|--------------|----------|
| FAM117A    | -0.172882687 | 0.5023894 | -0.595578784 | 0.0216477 | -0.354228098 | 0.17057  |
| BLVRA      | 0.183189427  | 0.4982537 | 0.6109106    | 0.0216735 | 0.172351797  | 0.522627 |
| ILF2       | 0.020124752  | 0.8131561 | 0.194629369  | 0.021729  | 0.155063539  | 0.067744 |
| SLC44A1    | -0.037665492 | 0.7864787 | -0.319051759 | 0.0217356 | -0.021753332 | 0.875583 |
| TSEN15     | -0.123740232 | 0.2830561 | 0.258113475  | 0.0217443 | 0.31890806   | 0.004628 |
| RILPL1     | 0.03872887   | 0.8294438 | 0.411075852  | 0.0217618 | -0.06332852  | 0.726486 |
| CCDC181    | -0.066384489 | 0.8051704 | 0.574364336  | 0.0217743 | -0.259796304 | 0.340706 |
| PSD3       | 0.279360694  | 0.0719609 | 0.355704972  | 0.0218032 | 0.416183779  | 0.007211 |
| FAM175B    | -0.135606463 | 0.1412047 | -0.209506639 | 0.0218202 | -0.194715165 | 0.03382  |
| FGD4       | -0.154403642 | 0.3623817 | -0.388255928 | 0.0219038 | 0.152033696  | 0.368603 |
| FAM102B    | -0.066617679 | 0.5791209 | -0.274825402 | 0.0219362 | -0.03499429  | 0.77006  |
| GABPB1     | 0.184178427  | 0.1207719 | 0.270716287  | 0.0219215 | 0.401007065  | 0.000675 |
| KIAA1919   | -0.206358027 | 0.0619509 | -0.251116722 | 0.0219371 | -0.456982087 | 3.93E-05 |
| P11-390M11 | 0.464476008  | 0.2648493 | 0.898099731  | 0.0219825 | -0.005875379 | 0.989174 |
| FMN2       | 0.417860713  | 0.429232  | 1.169338658  | 0.0220058 | -0.068992212 | 0.899576 |
| NLRX1      | 0.09660685   | 0.5850318 | -0.409087656 | 0.0221148 | 0.004771235  | 0.978489 |
| SFPQ       | -0.162726419 | 0.1534651 | 0.260311125  | 0.0221971 | 0.155332017  | 0.172526 |
| SLC2A10    | -0.142285904 | 0.3447327 | -0.344254483 | 0.0222761 | 0.044059775  | 0.769047 |
| EFR3B      | 0.117968616  | 0.6880575 | 0.6649103    | 0.0224033 | -0.040437459 | 0.890671 |
| USP6       | 0.008282861  | 0.9685699 | 0.466802581  | 0.0223943 | 0.311429315  | 0.133025 |
| EIF4A1     | 0.100506472  | 0.3343058 | 0.237439627  | 0.0224878 | 0.295162451  | 0.004556 |
| PRDM11     | -0.146177116 | 0.7429165 | -1.023912324 | 0.0225425 | -0.159227875 | 0.720047 |
| STIM2      | 0.168752476  | 0.1605052 | 0.271588408  | 0.0225537 | 0.026544307  | 0.824826 |
| ZNF689     | -0.373185062 | 0.0537602 | -0.439898635 | 0.022555  | -0.568627912 | 0.003315 |
| ZNF66      | -0.568943212 | 0.0685101 | -0.710180839 | 0.0226425 | -0.485599499 | 0.119494 |
| C1orf198   | 0.11573845   | 0.3034995 | -0.256941394 | 0.0226625 | -0.09064416  | 0.420718 |
| CEP164     | -0.185446762 | 0.1664102 | -0.302957508 | 0.0227446 | -0.333038868 | 0.013053 |
| EEF1A1P1C  | 0.385377546  | 0.2827741 | 0.779900726  | 0.0227112 | 0.729870281  | 0.034714 |
| OSBPL3     | -0.055406478 | 0.6715157 | -0.297111619 | 0.0227348 | -0.038415181 | 0.767908 |
| RINT1      | -0.016401509 | 0.8749814 | -0.23610746  | 0.022744  | -0.234488153 | 0.024078 |
| ZIM3       | 1.03775709   | 0.0787474 | 1.304982892  | 0.0227315 | 1.058834533  | 0.069907 |
| EPS8L2     | -0.230989053 | 0.1963854 | -0.407199517 | 0.0228071 | -0.56156579  | 0.00169  |
| OTC-534A2. | -0.298130812 | 0.1044054 | -0.414966003 | 0.0228442 | -0.099637372 | 0.579721 |
| EEF1A1P22  | -0.19091398  | 0.4910657 | -0.646949748 | 0.0228928 | 0.166974766  | 0.527563 |
| OR11A1     | -0.050799153 | 0.9355277 | 1.295796505  | 0.0228902 | 0.145826681  | 0.810714 |
| CTDSPL2    | 0.110863224  | 0.1439351 | 0.171355208  | 0.0230094 | 0.176409537  | 0.019396 |
| FAR2P4     | 0.06634625   | 0.892924  | 1.023405474  | 0.0230231 | 0.765835767  | 0.100453 |
| VSNL1      | 0.862832057  | 0.20989   | 1.540447137  | 0.0230237 | 2.06474956   | 0.002189 |
| FAHD2CP    | 0.017471209  | 0.9494336 | -0.635621619 | 0.0230576 | 0.428252739  | 0.112793 |
| PDXDC2P    | -0.271188712 | 0.0754605 | -0.346149458 | 0.0230813 | -0.249493736 | 0.100365 |
| SUDS3      | 0.018945493  | 0.8134332 | -0.181715739 | 0.023084  | -0.024447248 | 0.759695 |
| BTN3A2     | -0.174621848 | 0.2537156 | -0.346459614 | 0.0231276 | -0.192060327 | 0.208191 |
| CAP2       | 0.419664884  | 0.1461952 | 0.641813239  | 0.0231385 | 0.071917211  | 0.805452 |
| ERI1       | -0.185645812 | 0.1091932 | -0.26079348  | 0.0231623 | -0.122987085 | 0.285002 |
| HCG27      | 0.093293633  | 0.8821806 | 1.270344358  | 0.0231774 | 0.234118907  | 0.69847  |
| MIPOL1     | -0.058391266 | 0.7680541 | 0.448992868  | 0.0231662 | 0.08768897   | 0.657653 |
| PDCD4      | 0.07760837   | 0.6838875 | -0.432984904 | 0.023153  | -0.074400771 | 0.696257 |

|           |              |           |              |           |              |          |
|-----------|--------------|-----------|--------------|-----------|--------------|----------|
| AADAT     | 0.148287412  | 0.3524241 | 0.357421715  | 0.0232583 | 0.250967113  | 0.114087 |
| PMM1      | -0.233725639 | 0.226143  | -0.43754067  | 0.0232462 | -0.515138462 | 0.008017 |
| ACTL6A    | 0.027897009  | 0.8601434 | 0.35758188   | 0.0232821 | 0.268139833  | 0.089211 |
| ACBD4     | -0.145889877 | 0.4884907 | -0.481102084 | 0.0233204 | -0.485835858 | 0.02392  |
| GSG1      | 0.063506064  | 0.7894332 | 0.528847784  | 0.0233159 | -0.07086722  | 0.765845 |
| RPL8      | -0.04031011  | 0.7591337 | -0.298074484 | 0.0233692 | -0.105891396 | 0.420489 |
| TSPAN31   | 0.065255263  | 0.6055826 | -0.286967874 | 0.0234354 | -0.071000703 | 0.574466 |
| BEND5     | 0.575230391  | 0.0631644 | 0.690088946  | 0.0234602 | -0.018881091 | 0.951752 |
| ZNF502    | -0.304040533 | 0.1194395 | -0.429290101 | 0.0235215 | -0.366233882 | 0.058963 |
| LAP3      | 0.139947585  | 0.3217064 | 0.318302853  | 0.0235526 | 0.267468438  | 0.057075 |
| ACAN      | -0.041621984 | 0.9598856 | 1.7557571    | 0.0236154 | -0.526259018 | 0.535801 |
| PIP5K1A   | 0.218475033  | 0.0597477 | 0.262157035  | 0.0235866 | 0.053046786  | 0.647386 |
| TIGD4     | -0.127235287 | 0.6938202 | -0.760312979 | 0.023595  | -0.508666396 | 0.123926 |
| C2orf91   | -0.253520398 | 0.2855464 | 0.506557075  | 0.0236551 | 0.100699878  | 0.660564 |
| P11-74M13 | 0.517575334  | 0.2220883 | 0.930767308  | 0.0237648 | -0.448210069 | 0.317934 |
| VPS37C    | 0.044037112  | 0.6979902 | -0.257070875 | 0.0237943 | -0.112979104 | 0.318243 |
| FAM105B   | -0.00596973  | 0.9725043 | -0.39059714  | 0.023815  | -0.17778927  | 0.303843 |
| SH3BP1    | 0.086052046  | 0.5890243 | -0.36180486  | 0.0238329 | -0.159913727 | 0.316373 |
| GPR146    | 0.049043671  | 0.9067036 | -0.98511286  | 0.0238525 | -0.791404198 | 0.079206 |
| LPPR4     | 1.22229974   | 0.0602063 | 1.457860125  | 0.0238764 | 1.57012441   | 0.014951 |
| PPM1A     | -0.036520389 | 0.6283747 | 0.168328417  | 0.0238884 | 0.088015218  | 0.239869 |
| KIAA0247  | 0.149669546  | 0.4137666 | -0.415547385 | 0.0239673 | 0.0173803    | 0.924388 |
| NSUN5P1   | -0.26896259  | 0.2112577 | -0.484927864 | 0.0239822 | -0.929359109 | 1.66E-05 |
| ZNF526    | -0.151416302 | 0.2550995 | -0.298392964 | 0.0240061 | -0.378360364 | 0.004423 |
| NDUFB11   | -0.010026025 | 0.9326077 | -0.26756431  | 0.0240322 | -0.063993249 | 0.587893 |
| HBD       | 0.093642922  | 0.8837357 | -1.523439458 | 0.0240721 | -1.337037299 | 0.050631 |
| BIN3      | -0.02426675  | 0.7852354 | -0.200860118 | 0.024084  | -0.009491325 | 0.914275 |
| DDX28     | -0.113516069 | 0.444674  | -0.334588393 | 0.0241254 | -0.287687907 | 0.053252 |
| ACSL3     | 0.106792331  | 0.3915235 | 0.280611088  | 0.0241866 | 0.487902429  | 8.82E-05 |
| THSD7B    | 0.285068822  | 0.6608803 | -1.535514152 | 0.0242079 | -1.573639479 | 0.019463 |
| CASP14    | 0.687993308  | 0.2264168 | 1.232958393  | 0.02424   | 0.012174087  | 0.983242 |
| TRIM22    | -0.062623384 | 0.8093615 | 0.583086885  | 0.0242361 | 0.049763847  | 0.847786 |
| GPER1     | -0.163101022 | 0.6491437 | -0.825759708 | 0.0244073 | 0.257202407  | 0.461163 |
| RARB      | -0.195654705 | 0.2091497 | 0.342348151  | 0.0244457 | 0.154298534  | 0.31429  |
| TIMM44    | -0.086844334 | 0.3903035 | -0.227106033 | 0.0245308 | -0.081559588 | 0.417139 |
| P11-693N9 | 0.6147701    | 0.472306  | 1.787702659  | 0.0246512 | 1.734844301  | 0.031403 |
| C14orf2   | -0.149125367 | 0.1449465 | -0.227803372 | 0.0247838 | -0.111284592 | 0.273622 |
| COG8      | -0.178104634 | 0.0764967 | -0.223783033 | 0.0248078 | -0.413543902 | 4.23E-05 |
| FES       | -0.04618468  | 0.8800865 | 0.670052103  | 0.0248605 | 0.409431308  | 0.176916 |
| XXYL1     | 0.166693685  | 0.2176953 | 0.298793565  | 0.0248711 | -0.022141302 | 0.870079 |
| PAIP1     | 0.055846808  | 0.563678  | 0.216098107  | 0.0249651 | 0.341987419  | 0.000384 |
| LACTB     | 0.228182705  | 0.2722339 | 0.463801137  | 0.0250767 | 0.738667608  | 0.00035  |
| KIF16B    | -0.33449327  | 0.0976163 | -0.451058099 | 0.0251887 | -0.27987045  | 0.164838 |
| PTPRG     | -0.026016995 | 0.8938758 | 0.434515617  | 0.0252389 | 0.00527848   | 0.978385 |
| TRIM38    | -0.122639885 | 0.2966465 | -0.262124963 | 0.0252952 | -0.374044576 | 0.00151  |
| ZCCHC10   | 0.222691472  | 0.0956329 | 0.29673233   | 0.025333  | 0.413471315  | 0.001823 |
| GBP1      | 0.529649678  | 0.0880052 | 0.693260307  | 0.0253887 | 0.357093261  | 0.250198 |

|            |              |           |              |           |              |          |
|------------|--------------|-----------|--------------|-----------|--------------|----------|
| C1orf74    | -0.312419209 | 0.0812228 | -0.395936236 | 0.0254216 | -0.066240864 | 0.704151 |
| CHD3       | -0.149138648 | 0.4552035 | 0.446127563  | 0.0254104 | 0.279562279  | 0.161539 |
| NBPF1      | -0.300291057 | 0.0516581 | -0.343222514 | 0.0254545 | -0.555529249 | 0.000314 |
| SSTR2      | 0.008954235  | 0.9657364 | 0.455259637  | 0.0254931 | -0.017891929 | 0.931205 |
| S1PR1      | 0.085502026  | 0.82251   | -0.861823287 | 0.0255368 | -0.371531485 | 0.332202 |
| TXLNA      | 0.008161519  | 0.9320526 | -0.213714315 | 0.0255379 | -0.119721372 | 0.210935 |
| ZNF324B    | 0.152352888  | 0.3647695 | -0.376778615 | 0.025547  | 0.072503691  | 0.664363 |
| ST3GAL3    | 0.309246038  | 0.1642082 | 0.488286648  | 0.0255791 | 0.158027762  | 0.477691 |
| KIAA1328   | -0.076412304 | 0.7578291 | 0.552299168  | 0.0256403 | 0.049442831  | 0.841787 |
| PGBD5      | -0.366844029 | 0.2660397 | -0.737832588 | 0.0256435 | -0.338952954 | 0.306222 |
| SPHK1      | 0.834131095  | 0.0610154 | 0.986796089  | 0.0256041 | 0.723857949  | 0.103213 |
| TM4SF20    | -0.008903039 | 0.990285  | 1.621811438  | 0.0256384 | -2.204237349 | 0.003299 |
| SLX4IP     | -0.250077802 | 0.050182  | -0.274046978 | 0.0256737 | -0.437700338 | 0.000554 |
| ECSIT      | -0.057132125 | 0.7380767 | -0.380994407 | 0.0257188 | -0.180244852 | 0.290666 |
| HMGCL      | -0.211265398 | 0.0734669 | -0.262123008 | 0.0257908 | -0.143261656 | 0.222335 |
| UBA3       | -0.086618829 | 0.3456348 | 0.202487096  | 0.0258091 | 0.172922233  | 0.057632 |
| ITK        | 0.120302516  | 0.6852402 | 0.645647354  | 0.0258655 | 0.041415439  | 0.88869  |
| LRFN4      | -0.002832421 | 0.9922389 | 0.636666951  | 0.0259113 | 0.3918593    | 0.17359  |
| REM1       | -0.280280795 | 0.6215227 | 1.205498669  | 0.0259405 | -0.459282591 | 0.419328 |
| SCO2       | 0.131178009  | 0.286241  | -0.277383279 | 0.0259432 | -0.068678794 | 0.578215 |
| ADAM28     | 0.241957426  | 0.2327243 | -0.451776912 | 0.0259779 | 0.574229478  | 0.004601 |
| P11-255H23 | -0.265318122 | 0.202288  | -0.462809023 | 0.025977  | -0.030850871 | 0.881479 |
| UBAP1L     | -0.410191383 | 0.072743  | -0.499103531 | 0.0259843 | -0.591457874 | 0.00958  |
| ANAPC2     | -0.231606438 | 0.2822591 | -0.479950137 | 0.0260831 | -0.314778666 | 0.143586 |
| BRD1       | -0.076709385 | 0.4815206 | -0.241223156 | 0.0260234 | -0.083559481 | 0.44077  |
| CCDC167    | 0.017258732  | 0.9168673 | -0.37218985  | 0.0260752 | -0.072510548 | 0.659869 |
| NT5C3B     | 0.10323122   | 0.3592674 | 0.246556506  | 0.0260789 | -0.04096451  | 0.715174 |
| PCDHA2     | 0.173996799  | 0.5746234 | 0.648894681  | 0.0260587 | 0.190974999  | 0.525223 |
| TMEM181    | -0.004755739 | 0.9645655 | -0.238211545 | 0.0260581 | 0.087022161  | 0.415498 |
| CCDC71L    | 0.217256226  | 0.2991507 | 0.461315381  | 0.0262011 | 0.159418472  | 0.445385 |
| SLCO5A1    | 0.040804628  | 0.9564414 | 1.582201145  | 0.0262124 | 1.149697032  | 0.110243 |
| PDZRN4     | 0.008550559  | 0.9835004 | 0.906597792  | 0.0262299 | -0.702126026 | 0.093397 |
| OBSCN      | -0.044804332 | 0.7880049 | -0.370058391 | 0.0262648 | -0.570643162 | 0.000631 |
| TAF1C      | 0.259011406  | 0.1387914 | -0.391488223 | 0.0263255 | -0.676014067 | 0.000146 |
| ETNK1      | 0.021926224  | 0.8834151 | -0.33202191  | 0.0263719 | -0.08391698  | 0.57451  |
| HTRA1      | 0.073247337  | 0.819021  | 0.701590358  | 0.026369  | 0.13262131   | 0.67765  |
| UST        | -0.06047661  | 0.8471272 | 0.685551547  | 0.0263495 | 0.531697889  | 0.086479 |
| VNN2       | 0.36228289   | 0.468551  | 1.048005304  | 0.0264351 | 0.685841362  | 0.146416 |
| MT-ND1     | 0.416174942  | 0.154914  | -0.649294619 | 0.0265706 | -0.651110863 | 0.026165 |
| AGR3       | -0.147702808 | 0.4467303 | -0.430630376 | 0.0266246 | 0.060775296  | 0.753759 |
| OVGP1      | -0.107079637 | 0.6668043 | -0.558202979 | 0.0265938 | -0.458103581 | 0.068453 |
| TMEM212    | -0.026850255 | 0.8995329 | 0.46874427   | 0.0266181 | 0.133278227  | 0.529727 |
| OLFM1      | 0.41580003   | 0.3715798 | 0.962828472  | 0.0266762 | 0.455169014  | 0.309721 |
| SLC1A5     | 0.045389111  | 0.765519  | -0.33759859  | 0.0266682 | 0.053806237  | 0.723425 |
| AKAP8L     | -0.016808972 | 0.867133  | -0.222723425 | 0.0267161 | -0.312205841 | 0.001977 |
| NDRG1      | 0.344057055  | 0.2420635 | -0.651654301 | 0.0267356 | -0.253984673 | 0.387858 |
| RWDD4P2    | 0.74869994   | 0.2359302 | 1.38745803   | 0.0267253 | 1.647763262  | 0.008436 |

|            |              |           |              |           |              |          |
|------------|--------------|-----------|--------------|-----------|--------------|----------|
| TEX10      | -0.098969675 | 0.4191098 | 0.269387322  | 0.0267105 | -0.082259661 | 0.500387 |
| HSD17B1    | 0.141390146  | 0.3661876 | -0.347334341 | 0.0268456 | -0.253414451 | 0.108599 |
| PTCH2      | -0.039712593 | 0.8972128 | 0.677523253  | 0.0268458 | 0.691783768  | 0.023843 |
| TD-2005D2C | -0.230543391 | 0.707281  | -1.543180342 | 0.0268851 | 0.291741688  | 0.61721  |
| TMF1       | -0.020116187 | 0.885529  | -0.309126805 | 0.0269006 | -0.013122081 | 0.925117 |
| MED19      | -0.138424946 | 0.2423101 | -0.258631625 | 0.0270081 | -0.061733042 | 0.59538  |
| EEF1A1P3E  | 0.404384686  | 0.2926652 | 0.821546068  | 0.0270471 | 0.55092528   | 0.145072 |
| FECH       | 0.247619709  | 0.1521377 | 0.379010899  | 0.0270723 | 0.278342695  | 0.105332 |
| PLXDC2     | 0.042091606  | 0.8521487 | 0.498001228  | 0.0270725 | 0.135180423  | 0.549168 |
| SP3        | -0.071257689 | 0.2324631 | -0.131493831 | 0.0271237 | -0.020484512 | 0.730591 |
| ANKRD62    | 0.213048318  | 0.6619451 | 0.991935956  | 0.0272138 | 0.208910347  | 0.663939 |
| CFTR       | 0.160247614  | 0.7065382 | 0.916238747  | 0.027203  | 0.499641963  | 0.231888 |
| SATB1      | -0.049496331 | 0.7915756 | 0.412232903  | 0.0272663 | -0.158007335 | 0.399031 |
| ZYG11B     | -0.14291551  | 0.0960159 | -0.188664622 | 0.0273141 | -0.16829041  | 0.049733 |
| MPG        | -0.263582135 | 0.1106211 | -0.362004346 | 0.0274377 | -0.061895695 | 0.704713 |
| NXPH4      | -0.122228014 | 0.8286542 | -1.285994987 | 0.0275729 | -0.108474233 | 0.84713  |
| HOXC6      | -0.611139535 | 0.1578851 | -0.956490163 | 0.0276276 | -0.945804773 | 0.030136 |
| RP1L1      | 0.059174553  | 0.9064048 | 1.023421311  | 0.0276215 | 0.45178695   | 0.347357 |
| RPL7P36    | -0.054798732 | 0.9345991 | 1.296574735  | 0.0276371 | 0.817485051  | 0.179559 |
| PWP1       | 0.062610699  | 0.5035988 | 0.2042372    | 0.0277508 | 0.197368697  | 0.033748 |
| C17orf70   | 0.202767514  | 0.1816463 | -0.334780403 | 0.027865  | -0.198300865 | 0.193549 |
| CA5A       | 0.002020607  | 0.9937625 | 0.551976268  | 0.0279658 | -0.227623052 | 0.380496 |
| MORC4      | -0.114138264 | 0.5680468 | 0.438924839  | 0.0279623 | -0.01417075  | 0.943469 |
| SLC38A11   | -0.908728807 | 0.0516067 | -1.026661879 | 0.0280067 | -0.985648505 | 0.03357  |
| DOK4       | -0.290162296 | 0.0876356 | -0.372610044 | 0.0280437 | -0.378233089 | 0.025866 |
| LDB3       | 0.454671707  | 0.3178204 | 0.985526173  | 0.0280679 | -0.009671902 | 0.983097 |
| UBE2FP3    | 0.080750806  | 0.8509937 | -1.015585539 | 0.028147  | -0.747903077 | 0.100055 |
| JAGN1      | -0.002671698 | 0.9795487 | -0.228811422 | 0.0281717 | 0.053573902  | 0.603976 |
| TRIM13     | -0.130829544 | 0.2178842 | -0.231129588 | 0.0282002 | -0.037909474 | 0.719481 |
| PICALM     | 0.087745646  | 0.4049952 | 0.230733746  | 0.0282998 | 0.280034042  | 0.007757 |
| NDUFB6     | -0.332068688 | 0.1673425 | -0.524257149 | 0.028346  | -0.143807536 | 0.546137 |
| SYT15      | 0.417805214  | 0.0738008 | 0.509501628  | 0.0283541 | 0.688948879  | 0.003167 |
| ARVCF      | 0.203399138  | 0.3227891 | 0.446416137  | 0.0284124 | -0.113785196 | 0.582202 |
| TBC1D14    | -0.204050505 | 0.0679819 | -0.244691979 | 0.0284267 | -0.101650251 | 0.362524 |
| RABL6      | -0.143772082 | 0.1166087 | -0.199947651 | 0.0284765 | -0.164038196 | 0.072605 |
| CAMTA1     | 0.14901397   | 0.292629  | 0.306138523  | 0.0285302 | 0.260355347  | 0.064712 |
| AP1G2      | 0.027579803  | 0.8331192 | -0.287058125 | 0.0286438 | 0.008629288  | 0.947412 |
| ITFG1      | 0.126647317  | 0.318748  | 0.276906785  | 0.0286953 | 0.24209263   | 0.055947 |
| GMNC       | -0.745426965 | 0.1226942 | -1.02916076  | 0.0287396 | -0.782531607 | 0.09647  |
| CAPS       | 0.036076989  | 0.8757804 | -0.505173472 | 0.0288167 | 0.093098649  | 0.68615  |
| DPP10      | 0.094911057  | 0.6952707 | 0.527491597  | 0.0288091 | -0.45332587  | 0.062558 |
| KIFC3      | -0.102951417 | 0.5173009 | 0.342671523  | 0.0289467 | -0.205535321 | 0.195713 |
| COG1       | 0.294449359  | 0.0516312 | 0.32893089   | 0.0290349 | 0.047999266  | 0.751821 |
| ARMC4      | 0.888765485  | 0.134274  | 1.266138608  | 0.0291156 | 0.835623051  | 0.159385 |
| LPAL2      | 0.68983472   | 0.1481508 | 1.022596874  | 0.0290887 | -0.123061813 | 0.801278 |
| P11-82O19  | 1.018057146  | 0.0787547 | 1.222976568  | 0.0290958 | 1.109214115  | 0.051168 |
| SYT2       | 0.613636494  | 0.1029732 | 0.807963059  | 0.0291255 | -0.301074293 | 0.442799 |

|            |              |           |              |           |              |          |
|------------|--------------|-----------|--------------|-----------|--------------|----------|
| EPHA5      | 1.336897139  | 0.0565244 | 1.502166201  | 0.0292558 | 1.160188525  | 0.092614 |
| FD-2311M21 | 0.128481413  | 0.7630446 | 0.901508141  | 0.0293781 | 0.289249739  | 0.490842 |
| HAND1      | 0.686673883  | 0.0789431 | 0.848465025  | 0.0293676 | 0.081175044  | 0.836357 |
| PODXL2     | 0.214450851  | 0.414922  | 0.564034754  | 0.0293688 | -0.273833956 | 0.303901 |
| SERPINA6   | 0.7083787    | 0.3382423 | 1.562151384  | 0.0294332 | -0.760359907 | 0.35302  |
| TAF9B      | 0.07932691   | 0.5853697 | 0.31413032   | 0.029423  | 0.237535378  | 0.100593 |
| SVEP1      | 0.1155195    | 0.5499103 | 0.420063662  | 0.0294822 | -0.21530844  | 0.265598 |
| CPAMD8     | -0.041629464 | 0.8251043 | -0.410044056 | 0.0295449 | -0.405225251 | 0.031596 |
| TMEM44     | 0.174231618  | 0.2618413 | -0.34164322  | 0.0295374 | -0.103978624 | 0.50391  |
| TP53I13    | -0.140651646 | 0.4105542 | -0.371474504 | 0.0295957 | -0.378068239 | 0.026862 |
| ANKRD35    | 0.093445143  | 0.7839542 | -0.795173179 | 0.0296457 | 0.235646693  | 0.480411 |
| SMYD4      | -0.298168413 | 0.0940317 | -0.383868631 | 0.0297338 | -0.763390034 | 2.08E-05 |
| TNRC6B     | -0.088307367 | 0.443592  | -0.250418022 | 0.029799  | -0.344983598 | 0.00282  |
| FGFR1OP2   | -0.105610649 | 0.2338399 | -0.191576076 | 0.0298536 | -0.090398528 | 0.305677 |
| P11-752P2. | 0.767468918  | 0.2081054 | 1.271229261  | 0.0298553 | 1.405576807  | 0.016155 |
| RPS8       | -0.104410713 | 0.3618598 | -0.248656256 | 0.029876  | -0.080945626 | 0.479563 |
| MSMB       | -0.13210261  | 0.8203841 | -1.264026527 | 0.0299096 | 0.704156665  | 0.22602  |
| PRKCD      | 0.013310485  | 0.9302201 | -0.330941394 | 0.0299121 | -0.000573001 | 0.996984 |
| CNN3       | 0.109182398  | 0.4711055 | 0.328633316  | 0.0299403 | 0.235224713  | 0.120362 |
| ASTN2      | 0.031925194  | 0.8901238 | 0.500696819  | 0.0299555 | 0.027724347  | 0.904463 |
| P11-1114A5 | 0.286945412  | 0.6477322 | 1.25053596   | 0.0300298 | 0.300107128  | 0.627956 |
| ZNF317     | -0.112620324 | 0.31917   | -0.244484694 | 0.0300207 | -0.121314084 | 0.282684 |
| THRAP3     | 0.003609214  | 0.9657872 | 0.182092424  | 0.0300817 | 0.18913241   | 0.024292 |
| PDE3A      | 0.103438987  | 0.5685903 | 0.391615297  | 0.0301784 | 0.113314689  | 0.531965 |
| ADRBK2     | 0.171264839  | 0.428245  | 0.465909419  | 0.0302125 | 0.145318125  | 0.501773 |
| RGAG1      | 0.13628163   | 0.7828413 | 0.991732798  | 0.0302647 | 0.09548164   | 0.845721 |
| C16orf52   | -0.118180454 | 0.3014546 | -0.24706233  | 0.0302828 | -0.136086955 | 0.233061 |
| MED8       | -0.21553007  | 0.0917722 | -0.275803919 | 0.0303393 | -0.168834818 | 0.184954 |
| SCN7A      | 0.197849685  | 0.6284935 | 0.878964984  | 0.0304098 | -0.550682845 | 0.183692 |
| PDZRN3     | 0.258152779  | 0.3968415 | 0.657504519  | 0.0305368 | -0.062879118 | 0.836673 |
| VCPIP1     | -0.083275317 | 0.3231795 | -0.181466504 | 0.0305294 | -0.089418268 | 0.286547 |
| WNK1       | 0.206801388  | 0.2026099 | 0.350377521  | 0.0305618 | 0.083942302  | 0.604723 |
| LRP6       | 0.079560201  | 0.5341244 | 0.275565941  | 0.0306005 | 0.115425979  | 0.366043 |
| SLC5A3     | -0.224977091 | 0.0973244 | -0.29294274  | 0.0307186 | -0.368707823 | 0.006584 |
| SNRPC      | -0.038014921 | 0.7382586 | 0.243278456  | 0.0306992 | 0.224065314  | 0.04705  |
| UBAP2L     | 0.261335077  | 0.0764877 | 0.318411695  | 0.0307152 | 0.190673366  | 0.196076 |
| FBXO41     | -0.060117174 | 0.8446632 | -0.66573846  | 0.0307602 | -0.685291011 | 0.028593 |
| SNAI2      | 0.264212305  | 0.3382977 | 0.594321052  | 0.0308409 | 0.320388471  | 0.24514  |
| TD-2063L20 | -0.111298267 | 0.8239341 | 0.949380513  | 0.0308875 | 0.781313317  | 0.081673 |
| PATE4      | -0.061845918 | 0.8589291 | 0.689924808  | 0.0308805 | -0.123568874 | 0.721067 |
| SMAD7      | -0.370030943 | 0.1319144 | -0.529247002 | 0.0308707 | -0.145026705 | 0.552886 |
| UTS2B      | 0.515836293  | 0.087925  | 0.632097604  | 0.0309106 | 0.471076861  | 0.114115 |
| KLF14      | 0.38953987   | 0.4962131 | 1.182014852  | 0.030982  | 0.198211862  | 0.729934 |
| ERCC1      | 0.253732523  | 0.0526701 | 0.281272688  | 0.0310162 | 0.224958501  | 0.085412 |
| HEMK1      | -0.225669981 | 0.1521126 | -0.338474153 | 0.0310248 | -0.387203414 | 0.014273 |
| OXR1       | -0.161020881 | 0.1841402 | -0.260483094 | 0.0311204 | -0.127398995 | 0.291857 |
| C2orf72    | -0.27824545  | 0.293981  | -0.570812872 | 0.0311451 | -0.324962491 | 0.219798 |

|             |              |           |              |           |              |          |
|-------------|--------------|-----------|--------------|-----------|--------------|----------|
| THBS4       | -0.052183944 | 0.9535089 | 1.904917614  | 0.0311919 | 1.420743616  | 0.109315 |
| IL10        | 0.496927361  | 0.317048  | 1.004922423  | 0.0312095 | 0.096784719  | 0.849798 |
| TRMT2B      | -0.039350139 | 0.7356169 | -0.250161494 | 0.0312572 | 0.012702115  | 0.911974 |
| IFI30       | 0.496080973  | 0.2034574 | 0.828151264  | 0.0313377 | 0.720698389  | 0.062406 |
| PCSK2       | 0.693000597  | 0.2864988 | 1.352619188  | 0.0313723 | 0.326406282  | 0.619818 |
| CLEC4E      | 0.0649709    | 0.9144508 | 1.201135456  | 0.0314324 | -0.365053634 | 0.563021 |
| ENKD1       | 0.099444952  | 0.7188411 | -0.592613271 | 0.0314448 | -0.58001086  | 0.036999 |
| SDHA        | -0.141672822 | 0.1071349 | -0.188359559 | 0.0314448 | -0.018011081 | 0.837015 |
| EYS         | 0.153688067  | 0.5041978 | 0.486907814  | 0.0315046 | -0.29382245  | 0.203389 |
| FREM2       | -0.092154431 | 0.6235027 | -0.403891193 | 0.0315042 | -0.056190618 | 0.764617 |
| MINK1       | 0.026856687  | 0.8461875 | -0.297808556 | 0.0315657 | -0.211032854 | 0.127691 |
| ANKRD37     | -0.202954759 | 0.7057345 | 1.126504121  | 0.0316097 | 2.41877588   | 3.22E-06 |
| ANXA6       | 0.327641659  | 0.1176701 | 0.449534472  | 0.0316388 | -0.04009147  | 0.848263 |
| RNGTT       | -0.136132599 | 0.2632167 | 0.255788777  | 0.0316802 | 0.171505409  | 0.152189 |
| ZC3H3       | 0.193275566  | 0.2675402 | -0.382572179 | 0.0316885 | -0.302550194 | 0.089082 |
| GOLGA2P7    | -0.060062927 | 0.5646243 | -0.22355292  | 0.0317467 | -0.107717921 | 0.300947 |
| AC016712.2  | -0.383672511 | 0.4676131 | -1.195883869 | 0.0318077 | -0.549122783 | 0.299561 |
| METT13      | -0.224026343 | 0.135641  | -0.321336057 | 0.0318045 | -0.415390023 | 0.00559  |
| RP11-393I2. | 0.087077171  | 0.873314  | 1.081805601  | 0.0318928 | 0.263823346  | 0.620067 |
| ANG         | -0.036020184 | 0.8594286 | -0.437056628 | 0.0319391 | 0.097335006  | 0.631269 |
| PHLDA3      | -0.129807893 | 0.4277589 | -0.351382176 | 0.0319271 | -0.335936216 | 0.040262 |
| BRD3        | 0.136814496  | 0.3762026 | -0.331144442 | 0.0321241 | -0.370265353 | 0.017166 |
| MST1P2      | -0.581276824 | 0.1800909 | -0.932473247 | 0.0322387 | -0.93981706  | 0.031604 |
| NAA11       | 0.750400494  | 0.1938026 | 1.163291926  | 0.0322428 | 1.386703416  | 0.010682 |
| NRSN2       | 0.756190814  | 0.1062211 | 0.962981177  | 0.0322224 | 0.657169796  | 0.144991 |
| PIN1        | 0.202268888  | 0.0839548 | 0.247821074  | 0.0323653 | 0.192436934  | 0.098234 |
| VOPP1       | 0.016354694  | 0.876588  | -0.224853017 | 0.0323539 | 0.008422159  | 0.936004 |
| FAM134C     | -0.130173782 | 0.1864011 | -0.210419841 | 0.0324468 | -0.250584003 | 0.011057 |
| GCSAML      | 0.517655312  | 0.2007103 | 0.827632077  | 0.0324358 | 0.446689989  | 0.266505 |
| SSTR1       | -0.539683953 | 0.0942634 | -0.68673738  | 0.0325038 | 0.222780312  | 0.475478 |
| MYLK3       | -0.135274331 | 0.5980374 | 0.53670224   | 0.032527  | -0.002588772 | 0.991919 |
| PBX1        | -0.011447533 | 0.9405866 | 0.327146615  | 0.0325307 | -0.031143152 | 0.839198 |
| AIMP1       | -0.212096017 | 0.0586931 | -0.23883192  | 0.0326571 | -0.119707986 | 0.282728 |
| METT121EF   | 0.458108297  | 0.4149153 | 1.127340917  | 0.0327131 | 0.553331809  | 0.313821 |
| PPP1R26     | -0.170846514 | 0.2458601 | -0.313192116 | 0.0326958 | -0.047920161 | 0.742155 |
| TMEM45A     | -0.012904046 | 0.941189  | 0.372951317  | 0.0327209 | -0.166005678 | 0.342517 |
| DOK3        | -0.371915732 | 0.1809566 | -0.602626463 | 0.0327897 | -0.599496509 | 0.032947 |
| RPS6KL1     | 0.077681298  | 0.8122982 | 0.681701475  | 0.0327919 | -0.490390231 | 0.139352 |
| CCDC115     | -0.158847509 | 0.2573406 | -0.297656122 | 0.0329004 | -0.071303719 | 0.608317 |
| PTPN13      | -0.058370528 | 0.7071019 | -0.331176592 | 0.032978  | 0.020945371  | 0.892599 |
| C7orf49     | -0.026752192 | 0.8670842 | -0.340295009 | 0.0330235 | -0.2977209   | 0.06239  |
| HRH1        | 0.279387503  | 0.4824347 | 0.834458866  | 0.0330599 | 0.643570398  | 0.102458 |
| IL7R        | 0.530234634  | 0.0805342 | 0.642398179  | 0.0331837 | 0.363642845  | 0.229676 |
| TRIAP1      | -0.266636916 | 0.0710419 | -0.312725886 | 0.0332497 | -0.383026591 | 0.009452 |
| TTC21B      | 0.089933233  | 0.5241257 | 0.299688263  | 0.0332528 | 0.078338276  | 0.578524 |
| EXTL2       | 0.102903974  | 0.4347057 | 0.278382287  | 0.0332947 | 0.036997613  | 0.778219 |
| LEAP2       | 0.382621836  | 0.1863127 | 0.594815542  | 0.0333164 | 0.325064338  | 0.25387  |

|            |              |           |              |           |              |          |
|------------|--------------|-----------|--------------|-----------|--------------|----------|
| NRK        | 0.350332192  | 0.4030931 | 0.889357176  | 0.0333831 | 0.931150777  | 0.025924 |
| DHX33      | 0.32446279   | 0.0605742 | 0.365275966  | 0.0334875 | 0.17319167   | 0.315095 |
| IGF2       | 0.063900639  | 0.7262299 | -0.388025999 | 0.0334972 | -0.263064916 | 0.149473 |
| UBR5       | 0.207722425  | 0.180517  | 0.329557923  | 0.0334763 | 0.295951037  | 0.056285 |
| SLC26A3    | -0.114107364 | 0.8993196 | 1.911873443  | 0.0335552 | -2.46168493  | 0.007133 |
| USP49      | 0.151106543  | 0.4652036 | 0.436218279  | 0.0336569 | 0.015967829  | 0.938459 |
| PPP2R5A    | -0.152670392 | 0.1572025 | -0.228278542 | 0.0336861 | -0.080337963 | 0.453533 |
| C3orf72    | 0.083547167  | 0.7846927 | 0.615165115  | 0.033777  | -0.054722699 | 0.858191 |
| CDC25A     | -0.256976987 | 0.1273185 | -0.357574268 | 0.0337992 | -0.152142889 | 0.366017 |
| PRPF19     | 0.17436796   | 0.2550852 | 0.323674655  | 0.0339066 | 0.179544936  | 0.239859 |
| DNAJC7     | -0.049564096 | 0.6203134 | 0.210600903  | 0.0339218 | 0.131365441  | 0.186988 |
| P11-529H2C | 0.05327941   | 0.8595338 | 0.636606441  | 0.033943  | -0.084768924 | 0.778275 |
| ARG2       | 0.037536637  | 0.8613077 | -0.454108835 | 0.0341678 | -0.457705934 | 0.033869 |
| FBLN5      | 0.350547817  | 0.1862659 | 0.56043476   | 0.0341729 | 0.30837782   | 0.244822 |
| ADCY6      | -0.017611549 | 0.9039588 | -0.309186795 | 0.034215  | -0.213057664 | 0.144732 |
| NAE1       | -0.034649976 | 0.7283427 | 0.208409016  | 0.0342126 | 0.106948976  | 0.278626 |
| NUDT19     | -0.329135321 | 0.067052  | -0.376342472 | 0.0342627 | -0.218237743 | 0.218106 |
| AF131215.1 | -0.593980018 | 0.2798873 | -1.210953086 | 0.03444   | -1.258952883 | 0.03077  |
| CEBPG      | -0.032033256 | 0.7704332 | -0.232080687 | 0.0344117 | 0.072472431  | 0.507851 |
| NEK3       | 0.694485625  | 0.4155884 | -1.926384083 | 0.0344314 | -0.887444364 | 0.313921 |
| PLAGL1     | 0.237149926  | 0.1499771 | -0.350108765 | 0.034428  | -0.134765664 | 0.41505  |
| ZNF485     | -0.33858094  | 0.0821533 | -0.407042376 | 0.034448  | -0.413921707 | 0.032498 |
| GSTK1      | 0.121225052  | 0.1406622 | -0.17427775  | 0.0344792 | -0.041122336 | 0.617529 |
| MYH10      | 0.073602949  | 0.6435757 | 0.335901921  | 0.0345958 | -0.106885565 | 0.501606 |
| LDLRAD2    | -0.881456923 | 0.082653  | -1.079343734 | 0.03461   | -1.169560977 | 0.020463 |
| ARHGAP25   | -0.312615377 | 0.3484588 | -0.711493258 | 0.0346567 | -0.5918297   | 0.077901 |
| HNRNPDL    | -0.004961951 | 0.9489183 | 0.163123896  | 0.0348323 | 0.236123825  | 0.002257 |
| MINPP1     | -0.241661996 | 0.0701471 | -0.277856218 | 0.0348047 | -0.347887036 | 0.008697 |
| PLEKHG6    | 0.016073027  | 0.9419773 | -0.466434858 | 0.0347489 | -0.2609059   | 0.237327 |
| RIC3       | -0.035456005 | 0.9666643 | 1.749253103  | 0.0348243 | -0.081999455 | 0.922711 |
| SPNS1      | 0.141504915  | 0.2574999 | 0.259685147  | 0.0348274 | 0.210358104  | 0.08961  |
| SRSF9      | -0.045894056 | 0.6972682 | -0.248796993 | 0.0347276 | -0.153886663 | 0.191733 |
| ZNF584     | -0.186522162 | 0.233197  | -0.327704097 | 0.0347287 | -0.279942284 | 0.073248 |
| SRGAP1     | -0.45593048  | 0.266737  | -0.864212032 | 0.0348924 | -0.186854329 | 0.648923 |
| ABCB6      | -0.173753027 | 0.2301849 | -0.305594107 | 0.0349687 | -0.189305025 | 0.188235 |
| GMPR       | 0.143220293  | 0.7190016 | 0.795886592  | 0.0349872 | 0.093559732  | 0.810654 |
| MED10      | -0.049352818 | 0.7250945 | -0.295981069 | 0.0349883 | -0.294135959 | 0.037008 |
| PEG10      | 0.093997762  | 0.6681982 | 0.462512207  | 0.0349564 | 0.261373906  | 0.234636 |
| MRPL10     | -0.011371893 | 0.9311959 | -0.277819735 | 0.0350795 | -0.253990043 | 0.054381 |
| EIF5       | 0.056989887  | 0.7256211 | 0.342039514  | 0.0351147 | 0.352990628  | 0.029671 |
| MT-ND2     | 0.195829466  | 0.5121117 | -0.629524782 | 0.0351718 | -0.610920216 | 0.040957 |
| LINC00493  | -0.103597814 | 0.3234532 | -0.219503353 | 0.0353934 | -0.076374655 | 0.462981 |
| GRK5       | -0.016193891 | 0.9277373 | -0.376358591 | 0.0354283 | 0.053368131  | 0.764259 |
| CRMP1      | 0.433148525  | 0.2184572 | 0.737039     | 0.0355847 | 0.279457559  | 0.427197 |
| SKP1       | 0.074862758  | 0.317623  | 0.156688853  | 0.035604  | 0.143778578  | 0.054187 |
| CDR2L      | -0.27860481  | 0.0970529 | -0.351180138 | 0.0356427 | -0.16243333  | 0.330058 |
| DCAF10     | -0.21827043  | 0.1719365 | -0.334509333 | 0.0356486 | -0.406071988 | 0.010862 |

|            |              |           |              |           |              |          |
|------------|--------------|-----------|--------------|-----------|--------------|----------|
| ARHGEF40   | 0.361932416  | 0.0716797 | 0.421320228  | 0.0358463 | 0.33504385   | 0.095348 |
| ELOVL2     | 0.386510556  | 0.4197193 | 0.971750846  | 0.0358657 | -0.341876533 | 0.49135  |
| KIAA1430   | -0.181312701 | 0.1101787 | 0.235884748  | 0.0358249 | 0.018879023  | 0.867109 |
| METAP1     | -0.135298611 | 0.3245001 | -0.287406196 | 0.0358734 | -0.139805863 | 0.30721  |
| P11-536C1C | -0.161710627 | 0.6624142 | 0.76586957   | 0.0358915 | -0.336343427 | 0.364127 |
| SREK1      | -0.18024427  | 0.0634885 | -0.2034002   | 0.0357742 | -0.337957809 | 0.000502 |
| SUV39H1    | -0.252891466 | 0.270607  | -0.479928735 | 0.0358555 | -0.405836227 | 0.075973 |
| TMEM238    | 0.517606233  | 0.1924095 | 0.80410502   | 0.0358866 | 0.982674993  | 0.009994 |
| LPCAT4     | -0.38104557  | 0.061058  | -0.424348305 | 0.0359093 | -0.051163485 | 0.7995   |
| TTC14      | -0.062830783 | 0.6026103 | -0.252230274 | 0.0359793 | -0.20957092  | 0.082122 |
| QTRTD1     | 0.257113892  | 0.1404829 | 0.365258452  | 0.0360035 | 0.353533545  | 0.042448 |
| PC1S5-TXNI | -0.433304594 | 0.1001884 | -0.552181553 | 0.0360515 | -0.303957902 | 0.248156 |
| CCNB3      | 0.293164434  | 0.6709164 | 1.439026876  | 0.0360428 | 1.153321575  | 0.087431 |
| CA7        | 0.327124606  | 0.8205055 | 2.986133358  | 0.0361407 | -0.381035441 | 0.792574 |
| TAC4       | 0.611046896  | 0.2099153 | 0.981089686  | 0.0361513 | 0.765865905  | 0.106768 |
| MFSD4      | 0.649435903  | 0.0709051 | 0.742191138  | 0.0362433 | 0.506243784  | 0.159512 |
| C5orf28    | 0.11610351   | 0.4622578 | 0.323465662  | 0.0363426 | 0.284897582  | 0.066167 |
| ANXA8      | 1.48373289   | 0.0683756 | 1.700240632  | 0.0363625 | 2.420631645  | 0.002801 |
| ADAMTSL2   | -0.229344459 | 0.5885346 | -0.930296186 | 0.0364002 | -0.268407584 | 0.5243   |
| DGCR6      | -0.294318041 | 0.3302452 | -0.63266214  | 0.0364282 | -0.19333681  | 0.519414 |
| LURAP1     | 0.656521086  | 0.2519212 | 1.143653922  | 0.0364211 | 0.36510184   | 0.529273 |
| XKR9       | 0.102963823  | 0.6656093 | 0.490208204  | 0.0364073 | 0.255631182  | 0.279675 |
| WDR59      | 0.186865875  | 0.1954648 | 0.301343606  | 0.0365133 | 0.168445145  | 0.244313 |
| THRA       | 0.101277307  | 0.3854906 | -0.244781529 | 0.0366039 | -0.095251523 | 0.414536 |
| SLC27A4    | -0.171843176 | 0.2807676 | 0.32189672   | 0.0366714 | 0.075193744  | 0.630299 |
| ASB7       | -0.045663494 | 0.7101338 | -0.255101715 | 0.0367173 | -0.28298605  | 0.020761 |
| FBN3       | 0.337745675  | 0.5308273 | 1.122343317  | 0.0368599 | -0.344269518 | 0.52329  |
| ZBED4      | -0.019989097 | 0.808983  | -0.172108474 | 0.0368546 | -0.13110443  | 0.112479 |
| SEC14L6    | 0.446074443  | 0.0981679 | 0.547718099  | 0.0369093 | 0.402279423  | 0.132712 |
| AKAP17A    | 0.033450335  | 0.783252  | -0.254115456 | 0.0369287 | -0.113269096 | 0.351763 |
| NUPL1      | 0.146226987  | 0.0708901 | 0.168206882  | 0.0370632 | 0.351730323  | 1.28E-05 |
| CMTR2      | -0.070612144 | 0.4749713 | -0.204474522 | 0.0371688 | -0.192365801 | 0.050223 |
| CYGB       | 0.137608603  | 0.599756  | 0.539658976  | 0.0372487 | 0.118977854  | 0.648915 |
| MOGS       | 0.006231717  | 0.9649982 | -0.295885157 | 0.0372408 | -0.115206319 | 0.416956 |
| IGF2R      | -0.177598279 | 0.278825  | 0.340941584  | 0.0373501 | 0.170310551  | 0.298561 |
| KIF6       | 0.244674933  | 0.5699298 | 0.880862012  | 0.0373391 | 0.19130111   | 0.655061 |
| TRHDE      | -0.306372996 | 0.3724601 | 0.709219649  | 0.0374084 | 0.021701724  | 0.949549 |
| PDLIM1     | 0.204865238  | 0.0960106 | 0.255228265  | 0.0374356 | 0.428849818  | 0.000463 |
| KLHL3      | -0.201817912 | 0.3324335 | -0.435681291 | 0.0375431 | -0.400562446 | 0.055536 |
| RFTN1      | -0.241587086 | 0.2740756 | 0.452951363  | 0.0375544 | 0.106371304  | 0.627348 |
| THSD4      | 0.311712466  | 0.2386684 | 0.547202969  | 0.0375613 | 0.027081196  | 0.918649 |
| TMEM60     | -0.153347882 | 0.330322  | -0.325870109 | 0.0376093 | -0.26198179  | 0.095509 |
| PIGP       | -0.16367944  | 0.2654675 | -0.299684925 | 0.0376243 | -0.153040437 | 0.29154  |
| PARP15     | 0.027190421  | 0.916223  | 0.532302244  | 0.0376492 | 0.153883604  | 0.550046 |
| P11-153M7  | 0.055063014  | 0.8630575 | 0.654823365  | 0.0376579 | -0.113606958 | 0.72208  |
| CDH12      | -0.61399809  | 0.1150497 | -0.809413748 | 0.0377251 | 0.084203258  | 0.827595 |
| TMEM200C   | 0.039691236  | 0.9159836 | 0.772281542  | 0.0377866 | -0.144328745 | 0.701046 |



|            |              |           |              |           |              |          |
|------------|--------------|-----------|--------------|-----------|--------------|----------|
| P11-597D13 | -0.219293381 | 0.6739351 | 1.025281253  | 0.0378444 | 0.125309965  | 0.806792 |
| ZNF19      | 0.122001773  | 0.5789561 | 0.447070342  | 0.0378427 | 0.299593393  | 0.171926 |
| ZNF37BP    | -0.013104443 | 0.9477588 | 0.411668037  | 0.0378687 | -0.018918636 | 0.924473 |
| BDH1       | -0.391137023 | 0.1053934 | -0.496149426 | 0.0379889 | -0.359495406 | 0.133865 |
| COL11A2    | 0.62902896   | 0.2308034 | 1.085031133  | 0.0380749 | 0.025375039  | 0.961544 |
| ACOX2      | -0.585243843 | 0.1064551 | -0.752588359 | 0.038122  | -0.657889896 | 0.072887 |
| COX16      | -0.137365824 | 0.2555561 | -0.249781296 | 0.0381868 | -0.052444294 | 0.662188 |
| KMO        | -0.07162951  | 0.8615336 | 0.810693973  | 0.0381911 | 0.64801309   | 0.101658 |
| CCL22      | -0.078639119 | 0.8391756 | 0.746459979  | 0.0382781 | 0.375396178  | 0.310476 |
| NDOR1      | 0.19828241   | 0.1775168 | -0.310506661 | 0.0383058 | -0.040535143 | 0.784536 |
| FAT4       | 0.079737832  | 0.8009652 | 0.654533989  | 0.0384125 | 0.048754829  | 0.877506 |
| MFAP1      | -0.044871662 | 0.6688974 | -0.216917035 | 0.0383973 | 0.006278958  | 0.952088 |
| PIK3CG     | 0.67707206   | 0.1351705 | 0.911207461  | 0.0384244 | -0.10055226  | 0.833985 |
| RPS14      | -0.108684882 | 0.3907569 | -0.261778904 | 0.0386881 | -0.117687854 | 0.352603 |
| MSL1       | -0.056594299 | 0.5107505 | -0.177511744 | 0.0387255 | -0.069861208 | 0.416255 |
| ZNF571     | -0.205031355 | 0.1658948 | -0.303672464 | 0.0387406 | -0.458171233 | 0.002117 |
| CYSLTR1    | 0.022670992  | 0.9267738 | 0.508027715  | 0.0387997 | -0.029589861 | 0.904474 |
| AC004797.1 | 0.080117575  | 0.6829031 | 0.40114194   | 0.0388928 | 0.388341064  | 0.045916 |
| ARPC2      | 0.091963315  | 0.3207677 | 0.191019813  | 0.0388361 | 0.284197211  | 0.002112 |
| HCAR1      | -0.249664613 | 0.2311081 | -0.430045603 | 0.0388767 | -0.641589918 | 0.002228 |
| KLHDC8B    | 0.010438536  | 0.960782  | -0.439107364 | 0.0388858 | -0.4261335   | 0.045976 |
| SLC39A5    | -0.107253316 | 0.5413838 | -0.362758001 | 0.0388887 | -0.179868312 | 0.305551 |
| SRRM2      | 0.059262581  | 0.7681826 | -0.415505099 | 0.038841  | -0.281511192 | 0.161614 |
| SLC28A2    | -0.128768832 | 0.7824962 | -0.966450161 | 0.0389448 | 0.692644107  | 0.136005 |
| KIAA1549L  | 0.231645754  | 0.6425274 | 0.991256005  | 0.0389796 | -0.043289835 | 0.930507 |
| AC079807.3 | 0.404656078  | 0.4845497 | 1.101900773  | 0.0390794 | 0.541737807  | 0.335989 |
| CARHSP1    | 0.073239762  | 0.5955548 | -0.284923583 | 0.0390866 | 0.145932202  | 0.287346 |
| CLPP       | 0.166358675  | 0.3009522 | 0.328459071  | 0.0392093 | 0.394369209  | 0.013368 |
| P11-651P23 | 0.289936228  | 0.2466964 | 0.511911376  | 0.0391913 | 0.606799856  | 0.014511 |
| SFSWAP     | 0.129767913  | 0.4674378 | 0.367671335  | 0.0392072 | 0.028623587  | 0.872574 |
| UCHL3      | 0.046567717  | 0.6983292 | 0.244293136  | 0.0392365 | 0.489017351  | 3.40E-05 |
| CCDC144A   | -0.218817223 | 0.2930768 | 0.421552508  | 0.0393152 | -0.298605036 | 0.151284 |
| DENND2D    | 0.152358604  | 0.5378607 | -0.510364584 | 0.039304  | -0.291676331 | 0.238656 |
| MCUR1      | -0.125657888 | 0.3668354 | 0.285062547  | 0.0393702 | 0.011701161  | 0.932828 |
| NRBP2      | -0.039518115 | 0.7744122 | -0.28417538  | 0.0393592 | -0.059242528 | 0.666145 |
| P13-33H18  | 0.330164317  | 0.3680144 | 0.716547715  | 0.0393937 | 0.193215005  | 0.598345 |
| WDSUB1     | -0.134927828 | 0.446982  | -0.363752382 | 0.0394526 | 0.130454241  | 0.448956 |
| POLR1E     | 0.062440631  | 0.6277508 | -0.266019177 | 0.0395268 | -0.227910629 | 0.078532 |
| INSIG2     | -0.144779165 | 0.5621725 | -0.514571495 | 0.0395831 | -0.305881853 | 0.220826 |
| CIITA      | 0.807928545  | 0.0621363 | 0.884062786  | 0.0396069 | 0.596554477  | 0.169934 |
| SSR1       | -0.128091347 | 0.1237706 | -0.170724273 | 0.0396557 | -0.044142885 | 0.59515  |
| LHFP       | 0.523583141  | 0.2156965 | 0.866174397  | 0.0398004 | 0.82268382   | 0.051046 |
| P11-48B14  | -0.573607171 | 0.2228896 | -0.979427223 | 0.0398568 | -0.708201465 | 0.132224 |
| MUL1       | -0.006600043 | 0.959471  | -0.266995459 | 0.0399346 | -0.208153655 | 0.109649 |
| DNAJC28    | -0.198156171 | 0.6808373 | -1.037455528 | 0.0399954 | -0.025997901 | 0.956269 |
| GPR124     | 0.33200053   | 0.1825456 | 0.511100423  | 0.0399659 | -0.167537068 | 0.501654 |
| MRPS18B    | -0.121035294 | 0.1954629 | -0.190767646 | 0.0400092 | -0.180656518 | 0.052404 |

|            |              |           |              |           |              |          |
|------------|--------------|-----------|--------------|-----------|--------------|----------|
| SCAF11     | -0.100408452 | 0.2873564 | -0.19346302  | 0.0399845 | -0.005055815 | 0.957181 |
| SLC2A1     | 0.035254399  | 0.9000204 | -0.576294371 | 0.0400429 | -0.303043668 | 0.280194 |
| CYP26B1    | 0.422146715  | 0.1911921 | 0.656022832  | 0.0402279 | 0.73017188   | 0.022254 |
| ZNF568     | -0.178241526 | 0.5810619 | -0.658918192 | 0.0402378 | -0.627678616 | 0.051441 |
| L3MBTL1    | -0.302439183 | 0.1327709 | -0.410446616 | 0.0402706 | -0.583141186 | 0.003968 |
| FGF13      | -0.069993395 | 0.8496253 | 0.752487157  | 0.0403269 | 0.579316472  | 0.11596  |
| TUBA1A     | 0.269794371  | 0.3170814 | 0.552754641  | 0.0403133 | 0.236186089  | 0.381075 |
| RNF186     | 0.103145137  | 0.8776085 | 1.362903171  | 0.0404199 | -0.387300021 | 0.564242 |
| ANKRD54    | -0.203830829 | 0.1599702 | -0.294249024 | 0.040504  | -0.193504747 | 0.179149 |
| CHMP1B     | 0.19488252   | 0.0582396 | 0.209875083  | 0.040507  | 0.322118037  | 0.00166  |
| RRAS2      | 0.077512798  | 0.4989298 | 0.232474065  | 0.0405272 | 0.377937914  | 0.00086  |
| VIM        | 0.19240077   | 0.3340598 | 0.407996125  | 0.0404732 | -0.056963572 | 0.774899 |
| KIAA1107   | -0.105294671 | 0.5551318 | -0.365978662 | 0.0406534 | -0.702658099 | 0.000158 |
| PAK7       | -0.805227048 | 0.2463262 | 1.285112562  | 0.0407008 | 0.054666422  | 0.933363 |
| TP53I11    | 0.179122951  | 0.2051901 | -0.290933161 | 0.0406879 | 0.095747149  | 0.498278 |
| WNT5A      | 0.273527402  | 0.2834557 | 0.521126731  | 0.0406772 | -0.163325842 | 0.521944 |
| DDX41      | -0.031257668 | 0.7612159 | -0.209534353 | 0.0407457 | -0.165763949 | 0.106395 |
| MAT2A      | -0.149605768 | 0.216197  | -0.247328378 | 0.0407455 | -0.310092101 | 0.010359 |
| LPAR5      | -0.235627437 | 0.4620631 | -0.670533852 | 0.0409428 | -0.775575568 | 0.018942 |
| SIRPA      | -0.001692009 | 0.9941132 | 0.460704609  | 0.0409367 | -0.731644927 | 0.001791 |
| NPY2R      | 0.339511814  | 0.6361865 | -1.559513215 | 0.0410153 | -0.828097769 | 0.263059 |
| TBC1D1     | 0.257503699  | 0.0967804 | 0.315670835  | 0.0410444 | 0.231868892  | 0.134303 |
| MEST       | 0.129927957  | 0.5943566 | 0.49813257   | 0.0411156 | 0.074179631  | 0.761082 |
| UNC5CL     | -0.008312771 | 0.9677035 | -0.419778914 | 0.0411457 | -0.091962239 | 0.653682 |
| ARRDC1     | 0.057472063  | 0.6982475 | -0.303768755 | 0.041199  | 0.121230528  | 0.411748 |
| SLC17A9    | -0.046460923 | 0.8174525 | -0.411857177 | 0.0412186 | -0.045612841 | 0.82061  |
| SV2B       | 0.219727676  | 0.717066  | 1.202956733  | 0.0412178 | 0.023134588  | 0.969636 |
| TCF21      | 0.385353634  | 0.146475  | 0.539985831  | 0.041248  | -0.4145022   | 0.120868 |
| UBE2D3     | 0.087736538  | 0.3609513 | 0.195771394  | 0.0412334 | 0.285373531  | 0.002924 |
| SPATA24    | -0.499221441 | 0.0903423 | -0.588814634 | 0.0412812 | -0.339770698 | 0.236237 |
| THY1       | 0.442837876  | 0.0535243 | 0.467511487  | 0.0412918 | 0.070738851  | 0.758261 |
| ANKRD13D   | -0.134983003 | 0.3500795 | -0.29363437  | 0.0414674 | -0.447229797 | 0.00206  |
| SAP130     | -0.113461675 | 0.3193006 | -0.231364477 | 0.0414797 | -0.331722561 | 0.00371  |
| ADAMDEC1   | 0.663539986  | 0.3087009 | 1.322690862  | 0.0415086 | 2.056589003  | 0.001497 |
| AMOT       | -0.087070406 | 0.6354086 | -0.374473192 | 0.0415181 | -0.539060031 | 0.00339  |
| MT1G       | 0.831213623  | 0.4808513 | 2.393929737  | 0.0415824 | 0.439971199  | 0.709198 |
| TUBGCP2    | -0.001794525 | 0.9820684 | 0.160667528  | 0.0416056 | 0.036180511  | 0.647402 |
| GLUD2      | -0.232599129 | 0.3924637 | -0.555273283 | 0.0416222 | -0.336991452 | 0.214943 |
| PLA2G4B    | -0.243843228 | 0.6003941 | -0.948835401 | 0.0418068 | -0.231152497 | 0.621875 |
| SURF1      | -0.681042355 | 0.1817959 | -1.035923699 | 0.0418161 | -0.180435767 | 0.711125 |
| P11-262H14 | 0.419963698  | 0.543786  | 1.29253283   | 0.0419034 | 0.911413815  | 0.164244 |
| WDR83      | -0.020267823 | 0.916964  | -0.397118091 | 0.041947  | -0.445931856 | 0.023744 |
| MFSD5      | 0.03920723   | 0.7908956 | -0.300930167 | 0.0419797 | -0.106106395 | 0.47197  |
| KLHL15     | 0.019831622  | 0.8791192 | -0.265188447 | 0.0420654 | -0.140712616 | 0.280613 |
| MED26      | 0.024292608  | 0.8998357 | -0.395760682 | 0.0420678 | -0.124818621 | 0.520151 |
| PINLYP     | -0.178032466 | 0.5406417 | -0.587849468 | 0.0420749 | -0.218175862 | 0.449403 |
| ESRP1      | -0.291798151 | 0.0991638 | -0.359576661 | 0.0421241 | -0.094735659 | 0.592172 |

|            |              |           |              |           |              |          |
|------------|--------------|-----------|--------------|-----------|--------------|----------|
| KCNMB1     | 0.274426702  | 0.3096108 | 0.536361196  | 0.0422481 | -0.189296936 | 0.488244 |
| SEC24C     | 0.020910193  | 0.8228118 | -0.189456663 | 0.0423502 | -0.128256002 | 0.169552 |
| CIRH1A     | 0.152328044  | 0.3330995 | -0.31956243  | 0.0423816 | 0.099690481  | 0.525844 |
| FJX1       | 0.511089222  | 0.172155  | 0.751688096  | 0.0424224 | 0.388613856  | 0.298173 |
| COL4A3BP   | -0.117741568 | 0.2802636 | -0.220518715 | 0.0425443 | -0.140699242 | 0.195901 |
| TCTN3      | 0.027543664  | 0.7865584 | -0.206136556 | 0.0425879 | -0.259762826 | 0.010881 |
| P11-137H2  | -0.230517521 | 0.058538  | -0.244815727 | 0.0426639 | -0.352203364 | 0.003821 |
| SLFNL1     | -0.44173267  | 0.1883896 | -0.689624247 | 0.0426518 | -0.633152381 | 0.059874 |
| AGPAT1     | 0.224359495  | 0.0691563 | -0.250793842 | 0.042712  | -0.200858931 | 0.10481  |
| NPIPA7     | -0.057629138 | 0.6732065 | -0.277775622 | 0.0427571 | -0.215530026 | 0.11606  |
| FBXW10     | 0.625550193  | 0.1983824 | 0.968199356  | 0.0428059 | 0.587751665  | 0.221938 |
| TGFA       | 0.555236175  | 0.0694322 | 0.616268852  | 0.0429402 | 1.347066611  | 8.65E-06 |
| ANGPT1     | -0.089096803 | 0.7454744 | 0.552343654  | 0.0429749 | -0.127566332 | 0.64176  |
| MMADHC     | -0.091813371 | 0.3087087 | -0.181999664 | 0.0429873 | 0.051965515  | 0.562204 |
| SCHIP1     | 0.326497334  | 0.3846003 | 0.749520525  | 0.0429897 | -0.213921541 | 0.570023 |
| LDHAL6B    | 0.424663045  | 0.3228156 | 0.822936061  | 0.0430259 | 0.911882184  | 0.02505  |
| PPP1R21    | -0.35618185  | 0.0844521 | -0.415952147 | 0.0430765 | -0.212284285 | 0.302719 |
| ENPP2      | -0.053782501 | 0.8653765 | 0.636629267  | 0.0431328 | -0.105653919 | 0.738861 |
| GAB3       | 1.081155283  | 0.0769863 | 1.204962372  | 0.0431528 | 0.791663281  | 0.195101 |
| PLG        | 0.201739344  | 0.7057691 | 1.075054097  | 0.0432092 | -1.925682128 | 0.000539 |
| SERTAD3    | 0.113129658  | 0.4146677 | -0.281130857 | 0.0432042 | -0.258442513 | 0.063598 |
| WDR92      | -0.310563105 | 0.1212667 | -0.401182708 | 0.0432154 | -0.464502548 | 0.020556 |
| C4orf36    | -0.003736905 | 0.9838093 | 0.366545231  | 0.0433407 | -0.063954718 | 0.727766 |
| HEBP1      | -0.370162563 | 0.1092196 | -0.46465286  | 0.0433586 | -0.270545651 | 0.238243 |
| HILPDA     | 0.46749539   | 0.3338875 | 0.975861022  | 0.0433936 | 2.275029759  | 2.42E-06 |
| PFN1       | 0.200620909  | 0.1811566 | 0.302864037  | 0.0434224 | 0.438786292  | 0.003432 |
| PSMC1P1    | 0.0011644    | 0.9915799 | 0.220883902  | 0.0434685 | 0.188269435  | 0.08592  |
| SNX12      | 0.279783141  | 0.0562565 | 0.295318451  | 0.0434781 | 0.244716656  | 0.094275 |
| C9orf47    | 0.532165993  | 0.1555985 | 0.748951035  | 0.0435257 | 0.006208514  | 0.987007 |
| AREL1      | 0.156430791  | 0.1741386 | 0.231708009  | 0.043666  | 0.266043709  | 0.020506 |
| THAP4      | -0.097021905 | 0.5284773 | -0.309007921 | 0.0436803 | -0.214561376 | 0.162123 |
| HMG2N2P15  | 0.247842822  | 0.7802018 | 1.696100879  | 0.043747  | -0.171486066 | 0.849251 |
| AC006011.4 | 0.822382191  | 0.0633691 | 0.887925385  | 0.0438542 | 0.529228778  | 0.233624 |
| MAGEA10    | 0.575898658  | 0.2279642 | 0.917957735  | 0.0437966 | 0.097176525  | 0.844393 |
| PPFIA4     | -0.229903324 | 0.3073222 | -0.45408226  | 0.0438545 | -0.26893083  | 0.234232 |
| MRVI1      | 0.323061381  | 0.3065719 | 0.634868666  | 0.0438705 | 0.068420745  | 0.829193 |
| LAMA4      | 0.528540609  | 0.0654059 | 0.577781066  | 0.043984  | 0.59426427   | 0.038224 |
| SOX12      | -0.152132414 | 0.3427544 | -0.322320738 | 0.0439502 | -0.70869661  | 1.36E-05 |
| EYA4       | 0.395459154  | 0.5836412 | 1.446408103  | 0.0440283 | 1.072906594  | 0.136495 |
| SEMA6B     | 0.426550538  | 0.2775746 | 0.788504869  | 0.0440896 | 0.467136334  | 0.234831 |
| THEM5      | -0.455823787 | 0.5139758 | 1.250792944  | 0.0440907 | 0.897794076  | 0.14909  |
| FBXO43     | 0.020390114  | 0.9634723 | 0.826616523  | 0.0441681 | 0.296955272  | 0.488271 |
| SLK        | 0.156697282  | 0.1669842 | 0.228061505  | 0.0441475 | 0.449286914  | 7.26E-05 |
| SCD5       | -0.001227854 | 0.9946825 | 0.367121707  | 0.0442592 | 0.155439787  | 0.39629  |
| MTRFR2     | -0.513845891 | 0.1582566 | -0.726138994 | 0.0442914 | -0.531189088 | 0.137933 |
| ATF6       | 0.155572525  | 0.1062414 | 0.193048127  | 0.0443108 | 0.162456093  | 0.090792 |
| CBLB       | -0.134864774 | 0.4178317 | -0.334629312 | 0.0443887 | -0.045767363 | 0.782793 |

|           |              |           |              |           |              |          |
|-----------|--------------|-----------|--------------|-----------|--------------|----------|
| C2orf68   | 0.001227048  | 0.9921792 | -0.250311067 | 0.0444747 | -0.042364889 | 0.73439  |
| HOXA1     | -0.657611507 | 0.1018996 | -0.802042408 | 0.0444814 | -0.93208323  | 0.022368 |
| RNF175    | 0.478696686  | 0.3256657 | 0.910102078  | 0.044573  | 0.035954287  | 0.940443 |
| SLC11A2   | 0.275978972  | 0.1464582 | 0.381508044  | 0.044583  | 0.396748181  | 0.036753 |
| P11-419C5 | -0.297428095 | 0.0959755 | -0.357839294 | 0.0446229 | -0.191829631 | 0.278822 |
| C17orf51  | 0.010410612  | 0.9909653 | 1.739598123  | 0.044825  | 0.059886156  | 0.948008 |
| DNAJB5    | 0.362497299  | 0.0836553 | 0.416611954  | 0.0448849 | 0.157708044  | 0.452645 |
| IRF8      | 0.114551006  | 0.7747786 | 0.785557782  | 0.0448478 | 0.706443788  | 0.072211 |
| MIDN      | 0.259622656  | 0.1192771 | -0.335999276 | 0.0448776 | -0.199177522 | 0.234286 |
| PAG1      | -0.296687934 | 0.0767496 | -0.336268775 | 0.0447328 | -0.112731384 | 0.501035 |
| SAMD10    | -0.443306832 | 0.060724  | -0.469016157 | 0.0447856 | -0.000876546 | 0.996968 |
| SLC25A26  | -0.18411227  | 0.1734071 | -0.267185049 | 0.044866  | -0.287399624 | 0.031774 |
| LDHAL6CP  | 0.438452479  | 0.203101  | 0.676246378  | 0.044909  | 0.084200154  | 0.809303 |
| ARHGEF6   | 0.045714279  | 0.8629976 | 0.514543724  | 0.0449587 | -0.06139146  | 0.816674 |
| TRAK1     | 0.279110812  | 0.053179  | -0.289711376 | 0.0449318 | 0.029644103  | 0.837214 |
| UBN1      | -0.053575001 | 0.6919666 | -0.270967181 | 0.0449734 | -0.297065748 | 0.028078 |
| GPI       | -0.028809719 | 0.8697483 | -0.352226617 | 0.0450056 | -0.120109035 | 0.49419  |
| RBMX2     | -0.067717836 | 0.6655708 | -0.314429561 | 0.045097  | -0.130559454 | 0.404065 |
| DIS3      | 0.153096334  | 0.1061471 | 0.189317766  | 0.0451432 | 0.316118182  | 0.000822 |
| DUOXA1    | 0.604323095  | 0.1727288 | 0.880977936  | 0.0451707 | 1.377592022  | 0.001432 |
| SCIN      | -0.135329228 | 0.6452416 | -0.588825536 | 0.0452078 | -0.248674177 | 0.397579 |
| OSGIN2    | -0.081571257 | 0.6435554 | 0.349135415  | 0.0452503 | 0.233290304  | 0.181949 |
| TPTE2P2   | 0.3187488    | 0.4508183 | 0.831548004  | 0.0453675 | 0.584984979  | 0.166597 |
| VWCE      | 0.807150336  | 0.0545538 | 0.844298287  | 0.0454338 | 0.874511906  | 0.03721  |
| RASSF10   | -0.128049922 | 0.6122947 | -0.507175531 | 0.0454583 | -0.156314713 | 0.535071 |
| CCDC178   | -0.638858848 | 0.1104973 | 0.729274653  | 0.0454978 | -1.222881376 | 0.002409 |
| PXMP4     | -0.369939277 | 0.0625862 | -0.395231474 | 0.0454841 | -0.157954129 | 0.424178 |
| ZNF619    | -0.351082591 | 0.0869088 | -0.402195215 | 0.0455347 | -0.546779662 | 0.00727  |
| IMPA2     | 0.032941579  | 0.8414412 | -0.329301522 | 0.0455758 | 0.363165915  | 0.026685 |
| SLC2A4RG  | 0.033462452  | 0.8594556 | -0.377714696 | 0.0456121 | -0.298538164 | 0.113457 |
| NEGR1     | 0.560074729  | 0.0678837 | 0.607212225  | 0.0457435 | 0.265226304  | 0.385427 |
| TMEM43    | 0.045170518  | 0.6535845 | -0.201126991 | 0.0457307 | -0.154697856 | 0.124618 |
| WDPCP     | 0.060529255  | 0.7264608 | 0.343554501  | 0.0457504 | 0.097945608  | 0.570535 |
| AEBP1     | 0.279250449  | 0.2210125 | 0.455213385  | 0.0457894 | -0.062923516 | 0.78306  |
| MCOLN1    | 0.11232579   | 0.5550799 | 0.366060581  | 0.0457762 | -0.204507161 | 0.277848 |
| SORL1     | -0.427540589 | 0.0847974 | -0.495154877 | 0.0458813 | -0.513371468 | 0.03851  |
| TD-3088G3 | 0.311900118  | 0.4488408 | 0.780852296  | 0.045939  | 0.208893974  | 0.607929 |
| FKTN      | -0.350663469 | 0.0561149 | -0.364967714 | 0.046009  | 0.040665283  | 0.82411  |
| GOLT1A    | -0.195181927 | 0.4280128 | -0.492110156 | 0.0461576 | -0.479367881 | 0.052561 |
| IL12RB1   | 0.493701461  | 0.2000976 | 0.747966784  | 0.0461221 | 0.022932705  | 0.953564 |
| KRTCAP3   | -0.15162704  | 0.4191591 | -0.375211704 | 0.0461353 | 0.106509613  | 0.565322 |
| RXRA      | -0.04491285  | 0.7091633 | -0.239701885 | 0.0461545 | -0.110093317 | 0.359791 |
| SSH1      | -0.160964612 | 0.3596314 | -0.349815267 | 0.0461408 | -0.518673267 | 0.003229 |
| ZNF573    | -0.28506198  | 0.1055915 | -0.34167394  | 0.0461881 | -0.080361707 | 0.642262 |
| SYNJ1     | -0.187669229 | 0.7416484 | -1.135052942 | 0.046219  | -0.684540108 | 0.230289 |
| DYNC2H1   | 0.396926876  | 0.1043148 | 0.485290576  | 0.0463787 | 0.045312686  | 0.852868 |
| ANKRD29   | -0.426449928 | 0.3038969 | -0.824631885 | 0.0465893 | -0.088721734 | 0.827125 |

|            |              |           |              |           |              |          |
|------------|--------------|-----------|--------------|-----------|--------------|----------|
| CPSF4      | -0.03074501  | 0.8176715 | -0.265889302 | 0.0465963 | -0.193373988 | 0.147889 |
| ULK2       | 0.376009946  | 0.0750412 | 0.41879261   | 0.046562  | 0.259776277  | 0.217903 |
| ZNF276     | -0.188647468 | 0.3219062 | -0.377708831 | 0.0465823 | -0.188328306 | 0.321762 |
| XYLT2      | 0.05301012   | 0.689204  | -0.263930665 | 0.0466146 | -0.249457645 | 0.060874 |
| CD99       | 0.056516018  | 0.7874313 | 0.41588689   | 0.0467312 | 0.300967552  | 0.150232 |
| FLNC       | 0.256854113  | 0.3412753 | 0.536052906  | 0.0467204 | -0.304791056 | 0.259497 |
| RERG       | 0.176170327  | 0.3808083 | 0.394559639  | 0.0470022 | 0.32662445   | 0.103058 |
| SCN8A      | 0.445324843  | 0.2982392 | 0.84028077   | 0.0470198 | 0.790081372  | 0.062674 |
| SLC35C1    | -0.092756857 | 0.6109635 | -0.361214407 | 0.047043  | -0.223135963 | 0.219862 |
| SLC45A1    | 0.445819639  | 0.3181042 | 0.859923509  | 0.0471127 | 0.331393339  | 0.461282 |
| SPATS2     | 0.17838996   | 0.303308  | 0.34247026   | 0.0471476 | 0.010603468  | 0.951303 |
| HOXA10     | -0.707358116 | 0.0977329 | 0.819729627  | 0.0471747 | -0.194554507 | 0.642563 |
| HCN3       | -0.396653178 | 0.1839643 | -0.592128466 | 0.0472159 | -0.363455101 | 0.222643 |
| QKI        | 0.18665646   | 0.1615523 | 0.264179932  | 0.0472479 | 0.189289986  | 0.155707 |
| KDM3A      | -0.05427463  | 0.7506266 | 0.337554035  | 0.0473035 | 0.49879748   | 0.003338 |
| NAALAD2    | 0.181925303  | 0.5902378 | 0.665938247  | 0.0473374 | 0.009355957  | 0.977892 |
| PLD3       | 0.178657609  | 0.256965  | 0.3123283    | 0.0474661 | 0.046904702  | 0.766077 |
| AKAP10     | -0.182553251 | 0.1669685 | -0.260710981 | 0.0475446 | -0.189550381 | 0.150154 |
| ABAT       | 0.196064575  | 0.2075649 | 0.306861158  | 0.0475903 | 0.196753238  | 0.205094 |
| ACER2      | -0.001473719 | 0.9944563 | -0.420574826 | 0.0476401 | 0.292663404  | 0.166679 |
| CCDC78     | -0.247782197 | 0.4621341 | -0.670632674 | 0.0476655 | -0.336247571 | 0.320221 |
| AP1S3      | 0.196585159  | 0.2370748 | 0.326296907  | 0.0477155 | 0.550434165  | 0.000814 |
| EEF1A1     | -0.182331598 | 0.1229665 | -0.23398974  | 0.0477628 | -0.043241792 | 0.714504 |
| RAB26      | -0.095054231 | 0.7000813 | -0.497577204 | 0.0479844 | -0.33127453  | 0.186264 |
| STK33      | -0.106621603 | 0.6783193 | 0.49855563   | 0.0480518 | 0.016893515  | 0.947291 |
| UBAC2      | 0.077281143  | 0.4191577 | -0.189003375 | 0.0480791 | 0.02100124   | 0.825902 |
| TNC        | 0.736479088  | 0.1084261 | 0.906471147  | 0.0481386 | 1.23652162   | 0.007021 |
| LAPTM4A    | -0.091328604 | 0.4660517 | 0.24687744   | 0.0482419 | 0.133253403  | 0.286657 |
| PHLPP2     | 0.246921538  | 0.1237342 | 0.31533171   | 0.0482777 | -0.083562869 | 0.60307  |
| ZNF630     | -0.106850306 | 0.7055174 | -0.572599595 | 0.0483309 | -0.196982291 | 0.488496 |
| LZTR1      | -0.185764128 | 0.2598424 | -0.324998233 | 0.048392  | -0.37295683  | 0.023751 |
| NPLOC4     | 0.110495624  | 0.2228174 | 0.17830109   | 0.0484111 | 0.224560277  | 0.012975 |
| ALG2       | -0.057390843 | 0.6365421 | -0.239452858 | 0.0484405 | -0.088708084 | 0.464468 |
| ZNF600     | -0.017192605 | 0.9315637 | -0.395518978 | 0.0484631 | -0.061974012 | 0.75612  |
| ARID2      | 0.098532628  | 0.3070161 | 0.189307688  | 0.0486657 | 0.087950363  | 0.361088 |
| GRPR       | 0.321480162  | 0.6345863 | 1.29174976   | 0.0487588 | -0.167766068 | 0.806861 |
| PRKCB      | -0.555610056 | 0.4347272 | 1.369420459  | 0.0486872 | -1.099066757 | 0.128341 |
| p11-809N15 | 0.497123686  | 0.277649  | 0.864461843  | 0.048742  | 0.244447716  | 0.597117 |
| RPAP2      | -0.045045207 | 0.8049722 | 0.359085946  | 0.0486823 | -0.068420139 | 0.707479 |
| SLC38A6    | -0.13521337  | 0.4776662 | 0.368872675  | 0.0487528 | 0.07327158   | 0.697896 |
| SLC46A1    | 0.230986803  | 0.6223561 | 0.9062099    | 0.0486851 | -0.282450871 | 0.549195 |
| CUX1       | -0.01463753  | 0.9157356 | 0.271752195  | 0.0489602 | -0.019637966 | 0.887161 |
| DTD2       | 0.031428255  | 0.7960418 | 0.235726907  | 0.048898  | 0.161945579  | 0.17785  |
| FAM114A1   | -0.153733594 | 0.2741384 | -0.276609653 | 0.0489408 | -0.126512564 | 0.367636 |
| FOXC2      | 1.115481831  | 0.0630854 | 1.178023792  | 0.0489617 | 1.57774618   | 0.0082   |
| HMGB2      | -0.107676662 | 0.5179619 | 0.326876606  | 0.048891  | -0.014542448 | 0.930321 |
| MAP3K1     | 0.013565506  | 0.9002471 | 0.212003706  | 0.0489324 | 0.093264984  | 0.387442 |

|            |              |           |              |           |              |          |
|------------|--------------|-----------|--------------|-----------|--------------|----------|
| ACTR5      | 0.018334207  | 0.9179048 | -0.352517402 | 0.0490102 | -0.321700878 | 0.073458 |
| NOS2P3     | 0.14100332   | 0.7770788 | 0.905262141  | 0.0490647 | -0.030617252 | 0.951154 |
| ZKSCAN2    | -0.132510858 | 0.3685399 | -0.288586939 | 0.0491374 | -0.347368455 | 0.018608 |
| PPP1R3G    | -0.098747581 | 0.7086306 | 0.493714493  | 0.0492651 | 0.355335631  | 0.162092 |
| CACNA2D1   | -0.423642217 | 0.1808634 | 0.617343371  | 0.0492992 | 0.264915833  | 0.401713 |
| CTDSP2     | 0.017070634  | 0.9109389 | -0.300232328 | 0.049385  | -0.323630941 | 0.034231 |
| HLA-L      | 0.195255757  | 0.2851313 | 0.348709549  | 0.0495823 | 0.196473723  | 0.274431 |
| SPTSSA     | 0.037007071  | 0.7529308 | 0.228154868  | 0.0496321 | 0.205255216  | 0.078242 |
| EFEMP1     | 0.139217482  | 0.4751357 | 0.381903784  | 0.0496682 | -0.069893778 | 0.720021 |
| POU5F1B    | 0.135836244  | 0.7759597 | 0.887133465  | 0.0497573 | 0.649309276  | 0.157161 |
| APOBEC3D   | 0.124419001  | 0.6136714 | -0.491074759 | 0.0498142 | -0.211408226 | 0.397402 |
| ADI1       | 0.060520679  | 0.741367  | 0.356469505  | 0.0498654 | 0.323022073  | 0.07673  |
| NEDD8      | -0.038705027 | 0.6151508 | -0.149697083 | 0.0498573 | 0.069933982  | 0.358504 |
| DOCK10     | 0.543919783  | 0.2113474 | 0.836550257  | 0.0499591 | 0.259308456  | 0.543766 |
| ABCC8      | 2.453548832  | 0.0580895 | 2.994501297  | 0.0157239 | 2.017334585  | 0.119563 |
| AC002310.1 | 1.600779598  | 0.1476478 | 2.625602559  | 0.0104724 | 3.923848612  | 7.56E-05 |
| AC005077.8 | 2.947793949  | 0.0629718 | 3.435750795  | 0.0266411 | 2.226599237  | 0.171606 |
| AC005884.1 | -0.526057982 | 0.408789  | -1.426486007 | 0.0346477 | -1.028563414 | 0.116899 |
| AC010900.2 | 2.104987388  | 0.1525699 | 3.124003475  | 0.0224691 | 2.937206643  | 0.034007 |
| AC019109.1 | -0.361168551 | 0.714353  | 1.972312538  | 0.0164465 | 0.552793496  | 0.533616 |
| ALS2CR11   | -2.430660322 | 0.0783663 | 2.874256661  | 0.0032337 | -0.169802137 | 0.871304 |
| ANKRD20A8  | -0.269540909 | 0.7877144 | 1.841568485  | 0.0417491 | -1.372237761 | 0.196655 |
| ANO2       | 0.337377874  | 0.7911266 | 2.462755381  | 0.0370507 | -0.247281996 | 0.864175 |
| AP000350.1 | -2.34707488  | 0.1674975 | -4.856279629 | 0.0102276 | -1.869769415 | 0.26102  |
| APOBEC3H   | 1.620445177  | 0.1967833 | 2.416889778  | 0.0443704 | -0.565857289 | 0.71212  |
| AQP5       | 1.213969964  | 0.2775138 | 2.107985846  | 0.0475788 | 1.642137108  | 0.127472 |
| ARHGAP40   | 0.813271476  | 0.538612  | 2.517956401  | 0.0411281 | 1.985317424  | 0.105482 |
| ASCL1      | 1.345276338  | 0.4175382 | 3.935360506  | 0.0096225 | 2.544175782  | 0.103495 |
| ATP1A3     | 1.356003974  | 0.244252  | 2.237973121  | 0.0457131 | 0.332098112  | 0.789984 |
| BCORP1     | 1.353510533  | 0.158263  | 1.811275811  | 0.0480452 | 1.52567167   | 0.101882 |
| BHLHE22    | 1.762188743  | 0.3688663 | 4.130174233  | 0.0175408 | 1.656556984  | 0.399596 |
| BIN2       | 0.765411346  | 0.5753403 | 2.949673885  | 0.0093562 | 2.188587968  | 0.065922 |
| BPI        | 1.608653204  | 0.1621665 | 2.306568015  | 0.0358263 | 2.005824722  | 0.067331 |
| BTK        | 1.070572851  | 0.5807269 | 4.991275579  | 0.0045968 | 2.407165985  | 0.192005 |
| BTNL2      | 1.830258607  | 0.0987094 | 2.178455621  | 0.0463079 | 0.554658446  | 0.639266 |
| C10orf71   | 1.824727036  | 0.1388199 | 2.47336081   | 0.0387998 | 1.06519098   | 0.402831 |
| C2orf71    | 0.336161776  | 0.886906  | 4.450608604  | 0.0395036 | 1.671898718  | 0.45889  |
| C2orf80    | 0.8413226    | 0.2784601 | 1.649555348  | 0.0223547 | 0.710239372  | 0.360005 |
| CCDC144B   | 0.326870458  | 0.7163525 | 1.646676402  | 0.0448859 | 1.288627986  | 0.122476 |
| CD52       | -0.115577711 | 0.8509417 | -1.336025871 | 0.048078  | -1.537544131 | 0.028482 |
| CDSN       | -1.280698788 | 0.415138  | -5.05866203  | 0.0051352 | -0.709282476 | 0.645442 |
| CELF3      | -0.458989279 | 0.6094371 | 2.316523157  | 0.0025494 | -0.518365266 | 0.568769 |
| CHRNA9     | -0.273341975 | 0.910462  | 4.75454576   | 0.0326631 | 1.195010445  | 0.61573  |
| COX6CP16   | 1.057514813  | 0.6063137 | 3.814339978  | 0.0381877 | 1.651514887  | 0.419735 |
| CPLX1      | -0.052822346 | 0.9301711 | 1.438746914  | 0.0075609 | 0.533015812  | 0.335732 |
| CTB-1048E9 | 0.238016356  | 0.7490883 | 1.344845046  | 0.0425335 | 0.895466321  | 0.193396 |
| CTB-167G5  | 0.619925564  | 0.3149467 | 1.190410364  | 0.0432303 | 0.135950498  | 0.830202 |

|             |              |           |              |           |              |          |
|-------------|--------------|-----------|--------------|-----------|--------------|----------|
| TD-2161E1C  | 1.793233416  | 0.3405096 | 3.399950316  | 0.0437386 | 3.234786679  | 0.057493 |
| TD-2194F4.  | 1.057520682  | 0.527363  | 3.871857111  | 0.0057578 | 3.232290826  | 0.025869 |
| TD-2535L24  | 0.336070421  | 0.8979567 | 5.371044542  | 0.0270228 | 4.38512918   | 0.072993 |
| CXCL9       | 1.057501971  | 0.6340345 | 4.05578546   | 0.0445618 | 1.629991247  | 0.462444 |
| CYCSP10     | -0.181935962 | 0.7949962 | -2.006251322 | 0.0184122 | -1.466242911 | 0.065132 |
| CYP2D7P     | -0.0791573   | 0.9403495 | -2.326754427 | 0.0480228 | -0.503326676 | 0.637728 |
| CYP2G1P     | 2.910046631  | 0.0768321 | 3.563999442  | 0.0241268 | 2.369392545  | 0.159822 |
| DCSTAMP     | 1.694324197  | 0.2013636 | 2.681644516  | 0.0369689 | 1.591622043  | 0.232757 |
| DLGAP2      | 2.674480274  | 0.3780471 | 7.342369446  | 0.0119106 | 1.449331333  | 0.636071 |
| DLX6        | 1.018522037  | 0.5832949 | 4.330947312  | 0.0066558 | 4.049444591  | 0.011825 |
| DNASE1L2    | -0.256177899 | 0.6358482 | -1.329882629 | 0.0217    | -0.573377692 | 0.300644 |
| FAM204BP    | -2.20608657  | 0.0606751 | -2.427188009 | 0.0386002 | -1.934570413 | 0.079013 |
| FAM216B     | 1.210033276  | 0.1571852 | 1.60226183   | 0.0494343 | 2.135821146  | 0.007266 |
| FAM35CP     | -0.096104416 | 0.9390551 | 2.547772759  | 0.0099074 | 2.001606756  | 0.048532 |
| FAM86B2     | -0.500916486 | 0.7802236 | -3.893232649 | 0.0496187 | -0.121535479 | 0.94511  |
| FBXW11P1    | 2.666471167  | 0.1479158 | 3.59003554   | 0.0409573 | 3.25205498   | 0.067931 |
| FPR2        | 1.769440924  | 0.240802  | 3.263612356  | 0.0202867 | 2.012631767  | 0.168937 |
| FRG2        | -0.079290594 | 0.9390311 | -3.296729799 | 0.0128937 | -0.173663426 | 0.86633  |
| GAPDHP39    | -0.757073865 | 0.3287966 | -1.815090048 | 0.0400556 | -0.054654553 | 0.938244 |
| GPR112      | -0.58539342  | 0.6794618 | 2.852418316  | 0.0147837 | 0.301862288  | 0.814975 |
| GPR141      | 0.895196767  | 0.2261313 | 1.696787726  | 0.0161628 | 1.56943453   | 0.029795 |
| GPR88       | 2.763948138  | 0.1185247 | 3.546858202  | 0.0362449 | 3.798941175  | 0.024234 |
| GRK1        | 1.610346335  | 0.3712446 | 3.715088153  | 0.0175837 | 1.991370179  | 0.247751 |
| GS1-21A4.2  | 0.33618935   | 0.8450905 | 2.980415936  | 0.0422408 | 2.521969271  | 0.09363  |
| GSG1L       | 0.43142883   | 0.7619064 | 2.790314996  | 0.0269964 | 1.841443189  | 0.167088 |
| GZMA        | 2.395610124  | 0.2080692 | 4.582725108  | 0.008895  | 6.39904715   | 0.00021  |
| HMGB1P35    | 1.641190242  | 0.2830673 | 2.982094779  | 0.0295278 | 1.505423863  | 0.324841 |
| INRNPA1P4   | 2.772501586  | 0.0948562 | 3.558956437  | 0.0241039 | 2.652122316  | 0.109678 |
| HSPA8P18    | 1.953713516  | 0.1208462 | 2.422022859  | 0.0446818 | 1.204089259  | 0.365004 |
| IL9RP3      | -1.679050174 | 0.1802151 | -3.205350591 | 0.0203908 | -0.200663424 | 0.848176 |
| KB-1589B1.4 | -1.069279262 | 0.4731685 | -3.77825627  | 0.0227678 | -2.228778181 | 0.177484 |
| KLKB1       | 1.067171685  | 0.1870721 | 1.616765415  | 0.0417126 | 1.236902122  | 0.124032 |
| KRT8P17     | 1.057514107  | 0.5839435 | 4.020021606  | 0.017756  | 3.242185969  | 0.062587 |
| LY6K        | 1.39028432   | 0.1290478 | 2.048809456  | 0.0154559 | 1.982953633  | 0.021948 |
| MAP2K4P1    | 0.056200173  | 0.9418409 | 1.326001491  | 0.0490476 | 0.36450911   | 0.620154 |
| MARK2P9     | -0.857685533 | 0.3471537 | -3.366136952 | 0.0063043 | -0.549196258 | 0.522795 |
| MCF2        | 1.391509588  | 0.0977359 | 1.827773221  | 0.0215015 | 0.024246146  | 0.978567 |
| MIPEPP3     | -0.807400025 | 0.1791328 | -1.932707544 | 0.0055445 | -0.136205836 | 0.807032 |
| MTND2P26    | 1.768542931  | 0.27364   | 3.705647943  | 0.006442  | 2.64900201   | 0.069843 |
| MTNR1A      | 1.560167708  | 0.1142989 | 2.194263606  | 0.0201304 | 0.534045334  | 0.616195 |
| MYCT1       | -1.875003669 | 0.1493241 | 1.925185977  | 0.031975  | 2.179558672  | 0.016694 |
| NDUFB4P2    | 0.863216399  | 0.3055252 | 1.711318269  | 0.0305897 | 2.398091175  | 0.001985 |
| NPY         | 1.183287556  | 0.1340959 | 1.744022302  | 0.0216761 | 1.023815025  | 0.195087 |
| NPY6R       | 1.273322399  | 0.1600403 | 1.783610866  | 0.0411393 | 0.32435456   | 0.733538 |
| NUDT19P5    | 1.044443363  | 0.5485202 | 2.961924896  | 0.0494592 | -0.522692961 | 0.765735 |
| NXPH1       | 0.050889518  | 0.9689215 | 2.849882468  | 0.01537   | 1.51098003   | 0.207372 |
| OCLM        | 1.091185     | 0.0891451 | 1.272653146  | 0.04054   | -0.048893015 | 0.945746 |

|             |              |           |              |           |              |          |
|-------------|--------------|-----------|--------------|-----------|--------------|----------|
| OR2A1       | 0.6822639    | 0.4863723 | 2.303922573  | 0.0095341 | 1.21204734   | 0.194644 |
| PANX2       | -0.346288234 | 0.6534576 | -2.060444531 | 0.0470427 | -0.155393424 | 0.837705 |
| PAX3        | 2.19645891   | 0.1686229 | 3.578778228  | 0.0194402 | 1.502799363  | 0.364002 |
| PNPLA5      | 0.582175565  | 0.5250096 | 1.903827396  | 0.0179163 | 1.99849099   | 0.012971 |
| POU3F4      | 0.871969745  | 0.602396  | 3.22133938   | 0.0299327 | -0.517162102 | 0.769763 |
| PPIAP3      | -0.434581336 | 0.6990872 | -2.992569916 | 0.0326169 | 0.005402943  | 0.995981 |
| PSG5        | 0.801387282  | 0.3894172 | 1.81323119   | 0.0306999 | 1.427462248  | 0.114373 |
| PTMAP4      | 0.76853797   | 0.3885179 | 1.679171062  | 0.045872  | 0.923452523  | 0.291099 |
| RBMX2P3     | -0.461203605 | 0.6698266 | -2.763066667 | 0.0395254 | -0.628746293 | 0.562556 |
| REG3A       | -0.808937646 | 0.5994556 | 2.646126529  | 0.0288508 | 0.155703283  | 0.908757 |
| RHOT1P3     | 2.094741716  | 0.288498  | 4.226592556  | 0.0267298 | 4.710220276  | 0.013367 |
| P1-154J13.  | 2.151768273  | 0.0866924 | 2.666459887  | 0.0272795 | 2.874423333  | 0.016842 |
| P1-214M20   | 2.046095433  | 0.16064   | 3.296199035  | 0.0137324 | 2.891681996  | 0.03422  |
| RP1-308E4.  | -2.949520486 | 0.0534735 | -3.185431533 | 0.0370212 | -1.771799978 | 0.208166 |
| P11-115L11  | -2.092845139 | 0.096261  | -3.047326065 | 0.0171456 | -2.225760861 | 0.079925 |
| P11-129B9.  | 1.576746044  | 0.0726847 | 1.927924378  | 0.0224353 | 1.045219536  | 0.250493 |
| P11-133K1.  | 1.501673585  | 0.1746403 | 2.091280582  | 0.0482558 | 1.413543038  | 0.199864 |
| P11-162A12  | -0.430252716 | 0.4826377 | -1.500888053 | 0.0281777 | -0.323112942 | 0.588809 |
| P11-165H4.  | 0.615531235  | 0.5492439 | 2.046719541  | 0.0235576 | 1.490543369  | 0.112157 |
| P11-16F15.  | -1.406591648 | 0.2713266 | 1.793079578  | 0.0377828 | 1.261411405  | 0.157796 |
| RP11-17A4.  | 0.629686509  | 0.4280808 | 1.554902723  | 0.0301575 | 1.882929023  | 0.006651 |
| P11-214N16  | 0.423733742  | 0.7119474 | -3.710319298 | 0.0117279 | -2.160364353 | 0.140294 |
| P11-267J23  | 1.766804708  | 0.2959952 | 3.683992302  | 0.0110375 | 2.960234723  | 0.050051 |
| P11-335G2C  | 0.717428971  | 0.5416626 | 2.990802178  | 0.0034726 | 1.932517641  | 0.069695 |
| P11-346M5   | 2.386999177  | 0.1238149 | 3.293264456  | 0.0256917 | 2.211954187  | 0.154758 |
| P11-370B11  | -2.462994534 | 0.1095173 | -3.420251966 | 0.0262591 | -2.600526293 | 0.09108  |
| RP11-458I7. | 0.357736028  | 0.7648279 | 2.331758988  | 0.0216001 | 1.000124554  | 0.364731 |
| P11-466F5.  | 0.933085459  | 0.3768832 | 2.368822993  | 0.0113903 | 1.911961017  | 0.047142 |
| P11-466P24  | 0.308243956  | 0.9460123 | -18.43169102 | 7.09E-05  | 1.040608598  | 0.818705 |
| P11-475E11  | 1.139868577  | 0.1201862 | 1.72678774   | 0.0128007 | 0.598000608  | 0.432538 |
| P11-495P10  | -1.721811885 | 0.2210958 | -3.910846282 | 0.0097686 | -1.373619019 | 0.302102 |
| P11-506B6.  | 1.819655357  | 0.1050302 | 2.640744616  | 0.0133558 | 2.115161978  | 0.053643 |
| P11-529A4.  | 0.694208786  | 0.6087269 | 2.635569377  | 0.0277521 | 0.894579211  | 0.496545 |
| P11-543P15  | 3.405835928  | 0.0860557 | 4.187997814  | 0.030904  | 4.80418632   | 0.012681 |
| P11-56B16.  | 0.713510615  | 0.2450649 | 1.27814246   | 0.0268813 | 0.922913938  | 0.121434 |
| P11-613C6.  | 1.334084509  | 0.1148394 | 1.872009367  | 0.0195737 | 1.093157159  | 0.200475 |
| RP11-615I2. | 1.101598376  | 0.2884477 | 1.965888564  | 0.0436373 | 1.831228866  | 0.062836 |
| P11-628J14  | -0.385159801 | 0.8319587 | 3.309707137  | 0.0341006 | 0.931195683  | 0.606736 |
| P11-655M14  | 3.087178455  | 0.0557895 | 4.051380462  | 0.0084654 | 3.216145577  | 0.043345 |
| P11-680E19  | -1.675233048 | 0.0669674 | -2.458421986 | 0.0139031 | -1.215722404 | 0.151182 |
| P11-682B13  | 0.950971864  | 0.277061  | 1.861001019  | 0.0198566 | 0.451192145  | 0.620913 |
| P11-697N18  | 0.178183787  | 0.8181598 | 1.401407425  | 0.0335879 | 1.217967921  | 0.071113 |
| P11-740N7.  | -1.015074996 | 0.2734957 | -2.838804348 | 0.0214256 | -0.926512117 | 0.303056 |
| P11-820K3.  | 0.75307516   | 0.4855772 | 2.226838105  | 0.0227106 | 1.557272827  | 0.123209 |
| P11-86K22.  | 0.766152958  | 0.5636437 | 2.378917802  | 0.0422993 | 2.117183363  | 0.07509  |
| P11-90O23   | 0.34183476   | 0.8169025 | 2.80294065   | 0.0159253 | 2.366233457  | 0.04738  |
| P11-927P21  | 0.177996856  | 0.8772353 | -3.107103122 | 0.034533  | -0.498099524 | 0.676071 |



|             |              |           |              |           |              |          |
|-------------|--------------|-----------|--------------|-----------|--------------|----------|
| P11-95M15   | 0.873826848  | 0.5886306 | 2.985793494  | 0.0367779 | 1.97936559   | 0.182424 |
| P13-395E19  | 1.425514727  | 0.2597123 | 2.408775816  | 0.0457141 | -0.141588807 | 0.920898 |
| RP3-406A7.: | -0.743715089 | 0.326668  | -1.936785882 | 0.0260028 | -1.732751381 | 0.046431 |
| P3-423B22.  | 1.731130568  | 0.0635994 | 1.816132068  | 0.047366  | 2.162614282  | 0.016819 |
| RP4-665N4.  | 1.033456479  | 0.5963496 | 3.735601936  | 0.0304771 | 0.428400206  | 0.827071 |
| P5-875O13   | -1.282048228 | 0.3510378 | -3.582036886 | 0.0170535 | -1.44780919  | 0.294031 |
| RPL23AP2    | 2.236005494  | 0.2557197 | 5.144355871  | 0.0040164 | 3.93765434   | 0.030782 |
| RPL24P7     | -0.001214862 | 0.9981613 | -1.581515174 | 0.0116067 | -1.037909235 | 0.076135 |
| RPL5P25     | 0.336189971  | 0.8492022 | 3.017499831  | 0.0472486 | 0.929885607  | 0.59768  |
| RPL6P27     | 1.495896221  | 0.2996827 | 2.821269685  | 0.0466909 | 1.202311789  | 0.405794 |
| RPL7AP4     | 1.045436512  | 0.5366216 | 3.027466882  | 0.0364643 | 2.909474197  | 0.046267 |
| RPL7P49     | 0.299293445  | 0.7953867 | 1.933477134  | 0.0478128 | 1.162156452  | 0.261792 |
| RPL7P50     | 0.336187235  | 0.8404472 | 3.093724243  | 0.0272549 | 1.91880846   | 0.202679 |
| RPS16P5     | 1.507559478  | 0.0909677 | 2.017682126  | 0.0182726 | 2.071733867  | 0.015589 |
| RPS24P12    | -1.331315787 | 0.377259  | -2.98891227  | 0.0496129 | 0.542710186  | 0.661768 |
| RPS24P6     | 0.342360497  | 0.8218235 | 2.822680851  | 0.020399  | 2.901532137  | 0.017219 |
| RPS26P21    | 0.336177841  | 0.8433837 | 3.107341323  | 0.0307236 | 3.090870424  | 0.032346 |
| RRAD        | 1.625814203  | 0.0852948 | 2.330411163  | 0.012938  | 1.911098854  | 0.042406 |
| RTBDN       | 1.623784232  | 0.1133659 | 2.242387096  | 0.0192888 | 1.428694917  | 0.154113 |
| SLC6A17     | 0.514724746  | 0.5983888 | 2.035667713  | 0.0226259 | 1.098076669  | 0.233863 |
| SNRPEP10    | 1.673445458  | 0.2042965 | 2.721165825  | 0.0259586 | 3.867558181  | 0.001102 |
| SP140       | -0.112279119 | 0.9183355 | 1.959538386  | 0.0493647 | 0.062017983  | 0.953129 |
| SP7         | 1.276836931  | 0.3021571 | 2.538114681  | 0.0245468 | -0.584250766 | 0.689181 |
| SPATA32     | -0.932873385 | 0.2346393 | -1.734024059 | 0.0431176 | -0.713911738 | 0.347141 |
| SSX3        | 0.171810825  | 0.9267361 | 3.309940185  | 0.0408333 | 0.034279088  | 0.985363 |
| TBC1D27     | -0.248293255 | 0.7799835 | 1.644591655  | 0.0236434 | 1.132199314  | 0.127517 |
| TBX1        | -0.986968084 | 0.3348135 | -2.633155749 | 0.0439817 | -0.629610877 | 0.513293 |
| TLE1P1      | 1.470406679  | 0.0542909 | 2.213513262  | 0.0025976 | 0.581983239  | 0.468298 |
| TMEM121     | 0.674451311  | 0.5972977 | 2.683196763  | 0.0206496 | 1.024387746  | 0.404339 |
| TPM4P1      | -0.136466103 | 0.903135  | 2.095061807  | 0.0342848 | -0.090417629 | 0.934673 |
| TSHR        | 1.012732144  | 0.3294845 | 2.399029912  | 0.0146079 | -0.074447217 | 0.945788 |
| USP41       | -1.393356005 | 0.3635357 | -3.143285303 | 0.0458236 | -1.497809046 | 0.335596 |
| VIP         | 1.739272809  | 0.4259831 | 4.633148274  | 0.0188254 | 2.926807495  | 0.153366 |
| VN1R107P    | -0.616082861 | 0.6433529 | -2.874066798 | 0.0481758 | 1.128579496  | 0.315508 |
| WDR64       | -0.483611235 | 0.8000477 | 3.554240836  | 0.0372232 | -0.156685957 | 0.934337 |
| WDR87       | -0.257685663 | 0.8820895 | 3.463379154  | 0.0260062 | 0.779829652  | 0.629309 |
| WFIKKN1     | -0.859850354 | 0.1553944 | -1.531066109 | 0.0168992 | -0.667730621 | 0.250009 |
| ZDHHC22     | 1.612796472  | 0.1977884 | 3.738356139  | 0.0013965 | 2.350959469  | 0.053006 |
| C16orf89    | -0.244490956 | 0.5532209 | 0.41443343   | 0.2906965 | 1.997127113  | 7.91E-08 |
| DUSP7       | 0.013096134  | 0.9359737 | -0.300915314 | 0.0660248 | -0.885614077 | 2.29E-07 |
| LCN15       | -1.41354401  | 0.0928108 | -1.207022354 | 0.1510016 | -4.375518998 | 2.84E-07 |
| RHOA        | -0.084364877 | 0.1333703 | 0.084126751  | 0.1326874 | 0.286695049  | 2.87E-07 |
| SWAP70      | 0.117080846  | 0.3458339 | -0.01354905  | 0.9125197 | 0.622841085  | 3.19E-07 |
| EGLN3       | 0.306124832  | 0.2096765 | 0.275052402  | 0.2594498 | 1.2415321    | 3.49E-07 |
| FAM175A     | -0.044528087 | 0.6536703 | 0.142522275  | 0.1437082 | -0.496797836 | 7.57E-07 |
| ANXA7       | 0.204473343  | 0.0637439 | 0.211764145  | 0.0540132 | 0.53807366   | 9.06E-07 |
| ADAM9       | 0.268732038  | 0.0552113 | 0.238626162  | 0.0885532 | 0.673417905  | 1.52E-06 |

|          |              |           |              |           |              |          |
|----------|--------------|-----------|--------------|-----------|--------------|----------|
| ABI1     | 0.084808186  | 0.3042083 | 0.12757409   | 0.1189359 | 0.38898089   | 1.82E-06 |
| STK38L   | 0.166216988  | 0.2245442 | 0.165466384  | 0.2263669 | 0.648354136  | 2.03E-06 |
| FABP6    | -0.093083897 | 0.9390754 | -0.38287488  | 0.7532187 | -5.948403951 | 3.00E-06 |
| GABRA2   | -0.217081402 | 0.5455413 | 0.652964829  | 0.067224  | -1.698709674 | 3.36E-06 |
| SFRP4    | 1.784727685  | 0.2308197 | 1.987310254  | 0.1764568 | 6.636565783  | 3.37E-06 |
| NDNF     | -0.137745118 | 0.7356327 | -0.017697302 | 0.9653447 | -1.983661429 | 3.62E-06 |
| EIF2S2   | 0.019773077  | 0.8366212 | 0.1858043    | 0.0518675 | 0.435419577  | 5.09E-06 |
| LRRC8B   | 0.239796509  | 0.0679332 | 0.230384562  | 0.0783877 | 0.594836919  | 5.13E-06 |
| PHYHIPL  | -0.576845367 | 0.3153441 | -0.587994072 | 0.3066879 | -2.866981128 | 6.29E-06 |
| ROS1     | 0.989516027  | 0.0607773 | 0.356177621  | 0.5038821 | 2.28598854   | 6.66E-06 |
| UBE2J1   | 0.122684781  | 0.1698656 | 0.141244819  | 0.1127151 | 0.399923595  | 6.80E-06 |
| MPHOSPH8 | -0.256139606 | 0.071945  | -0.245905263 | 0.0834704 | -0.637329834 | 8.01E-06 |
| INPP5D   | -0.505425996 | 0.1162677 | -0.470022823 | 0.1425695 | -1.446540209 | 9.28E-06 |
| SLC10A2  | -0.215646347 | 0.8298934 | 0.25672671   | 0.7977772 | -4.823431233 | 1.09E-05 |
| LYPD6    | 0.38255062   | 0.051908  | 0.260622265  | 0.1828669 | 0.842077714  | 1.35E-05 |
| PTCHD4   | -0.346357351 | 0.3193183 | -0.462839215 | 0.182282  | -1.531790726 | 1.73E-05 |
| NIPA2    | 0.090392253  | 0.3036654 | 0.134109509  | 0.124382  | 0.373134769  | 1.80E-05 |
| SYTL2    | 0.334790609  | 0.1325021 | 0.072361921  | 0.7451131 | 0.951559092  | 1.86E-05 |
| POLRMT   | -0.296924341 | 0.0590171 | -0.266265497 | 0.0879432 | -0.668994497 | 2.18E-05 |
| STS      | 0.218957387  | 0.200556  | -0.022388115 | 0.895877  | 0.716866445  | 2.33E-05 |
| ZBTB3    | -0.156115844 | 0.3991617 | -0.220358509 | 0.2338616 | -0.799373632 | 2.41E-05 |
| RBM3     | -0.007784071 | 0.9055673 | 0.120514944  | 0.064729  | 0.268732351  | 3.77E-05 |
| HAND2    | -0.211334495 | 0.4520024 | 0.18960801   | 0.4965335 | -1.167926097 | 3.98E-05 |
| DPP4     | -0.058670166 | 0.9039466 | 0.420351292  | 0.3870956 | -1.998111675 | 4.11E-05 |
| CASP4    | 0.289018893  | 0.1002718 | 0.11969847   | 0.4957583 | 0.710865807  | 4.89E-05 |
| UBXN10   | -0.62553122  | 0.0643518 | -0.423988338 | 0.1962483 | -1.463779401 | 5.03E-05 |
| SUSD2    | 0.17998885   | 0.7123642 | 0.264491389  | 0.5865863 | -2.120479852 | 5.07E-05 |
| DET1     | -0.183072805 | 0.2187017 | 0.094030908  | 0.5141354 | -0.609153448 | 5.78E-05 |
| ARPC5    | 0.108624491  | 0.2806246 | 0.188589824  | 0.0601253 | 0.395937711  | 7.88E-05 |
| KCTD21   | -0.288896616 | 0.0991027 | -0.215935262 | 0.2159248 | -0.689498089 | 8.97E-05 |
| TTR      | 0.204393932  | 0.8003131 | 1.308628345  | 0.10508   | -3.189966444 | 9.40E-05 |
| STAG3L3  | -0.207241596 | 0.1045958 | 0.005703427  | 0.9636381 | -0.502652942 | 9.50E-05 |
| PELI2    | 0.315736664  | 0.1120538 | 0.369293529  | 0.0628212 | 0.768269727  | 0.000105 |
| RAB27A   | 0.422132861  | 0.0543229 | 0.152323149  | 0.4877294 | 0.844177968  | 0.000115 |
| PNPLA8   | 0.261744861  | 0.1005573 | 0.27684415   | 0.0817032 | 0.611616021  | 0.000117 |
| NTPCR    | -0.104553889 | 0.3312154 | -0.18127778  | 0.0886504 | -0.417538344 | 0.000117 |
| CD47     | 0.16931897   | 0.3075534 | 0.266627896  | 0.1076008 | 0.637356022  | 0.000118 |
| RBM5     | -0.158490842 | 0.0869717 | -0.088469348 | 0.3390073 | -0.356691669 | 0.00012  |
| SLC19A2  | 0.11804432   | 0.2987923 | 0.174733243  | 0.1214591 | 0.431539243  | 0.000125 |
| MUC17    | -0.546546093 | 0.4715761 | -0.224663367 | 0.7667952 | -2.925961714 | 0.00013  |
| PPIA     | 0.14060704   | 0.1339894 | 0.142923076  | 0.1275167 | 0.356930617  | 0.000141 |
| TNRC6A   | -0.268919471 | 0.1038385 | -0.254228276 | 0.1235949 | -0.629060308 | 0.000143 |
| ARNTL2   | 0.317491608  | 0.1005359 | 0.17148222   | 0.3745835 | 0.730853528  | 0.000144 |
| BRD8     | -0.297414172 | 0.0537304 | -0.15148644  | 0.3239016 | -0.58641929  | 0.000144 |
| C4orf19  | 0.349081005  | 0.0590875 | 0.167458682  | 0.3650201 | 0.698083313  | 0.000148 |
| RBM4B    | -0.174545934 | 0.2350964 | -0.280197    | 0.0561206 | -0.558793702 | 0.000162 |
| F10      | 0.027052076  | 0.9418272 | 0.195895122  | 0.594549  | -1.460240786 | 0.000163 |

|            |              |           |              |           |              |          |
|------------|--------------|-----------|--------------|-----------|--------------|----------|
| LPIN3      | -0.254059515 | 0.2323563 | -0.397881481 | 0.06116   | -0.801955778 | 0.000167 |
| APOA2      | -0.370827747 | 0.6676906 | 0.404145912  | 0.6394407 | -3.288444518 | 0.000168 |
| AMIGO2     | 0.266261925  | 0.3564345 | 0.091249563  | 0.7518841 | 1.07649622   | 0.000177 |
| ZNF503     | -0.359899858 | 0.1712253 | -0.255332574 | 0.3284238 | -0.997373706 | 0.000181 |
| PRRG4      | 0.112327054  | 0.456707  | 0.156304314  | 0.2940841 | 0.550308117  | 0.000187 |
| ATG4A      | 0.076240954  | 0.6878104 | 0.364413065  | 0.0512791 | 0.695328461  | 0.000191 |
| TB-63M22.  | 5.523524305  | 0.2636327 | 0.740623488  | 0.8810218 | -18.81000863 | 0.000193 |
| TACSTD2    | 0.129374577  | 0.5410676 | -0.143633966 | 0.4975249 | 0.784240745  | 0.000197 |
| DNAJB12    | 0.10956072   | 0.1659698 | 0.130900058  | 0.0938252 | 0.289470678  | 0.000198 |
| SEMA3C     | 0.377635152  | 0.076941  | 0.216725256  | 0.30999   | 0.793529396  | 0.000198 |
| DCTN2      | 0.10230901   | 0.2436675 | 0.168880878  | 0.0529864 | 0.323575527  | 0.000203 |
| SH3TC2     | -0.447592195 | 0.2500581 | -0.618617756 | 0.1108387 | -1.466660659 | 0.000207 |
| C17orf58   | 0.101532111  | 0.5565673 | 0.250213933  | 0.1381347 | 0.613656441  | 0.00021  |
| FSD1L      | -0.306083238 | 0.0707168 | -0.25145873  | 0.1282208 | -0.620707818 | 0.000215 |
| PRKAA1     | 0.108388039  | 0.243158  | 0.126707142  | 0.1714504 | 0.342145008  | 0.000218 |
| C11orf84   | -0.067121935 | 0.5700438 | -0.192284747 | 0.1017934 | -0.438489504 | 0.00022  |
| GNAI1      | -0.217762555 | 0.1040521 | -0.113045937 | 0.3963033 | -0.494307051 | 0.000231 |
| ZNF70      | 0.013080356  | 0.931674  | -0.059945707 | 0.6925821 | -0.57283202  | 0.000233 |
| HIATL1     | 0.105422534  | 0.2407367 | 0.099113303  | 0.2674955 | 0.3277513    | 0.000234 |
| TET1       | -0.166079919 | 0.2098602 | -0.051085046 | 0.6981186 | -0.485980832 | 0.000255 |
| SLC9A3     | -0.089359458 | 0.772102  | -0.087370404 | 0.7739929 | -1.156078565 | 0.000265 |
| TMBIM1     | 0.224920743  | 0.1218918 | 0.220749889  | 0.1287718 | 0.527244188  | 0.000284 |
| GPRC5B     | 0.202920793  | 0.3612854 | 0.107868293  | 0.6270777 | 0.797699753  | 0.00031  |
| QPRT       | -0.153020079 | 0.1282529 | -0.035385924 | 0.7238073 | -0.363037379 | 0.000311 |
| MALRD1     | -0.499322941 | 0.2534348 | 0.301428756  | 0.4858546 | -1.623152026 | 0.000321 |
| PRSS3P1    | 0.765559395  | 0.1019695 | -0.008170008 | 0.9860796 | 1.682443175  | 0.000324 |
| AC027612.C | -0.356813938 | 0.2202543 | -0.391548057 | 0.176383  | -1.059993854 | 0.000329 |
| RPS6KA3    | 0.124151145  | 0.2030293 | -0.032413116 | 0.7394988 | 0.349485616  | 0.000329 |
| UBE4B      | -0.0897304   | 0.4782726 | -0.112137484 | 0.3744358 | -0.455119955 | 0.000337 |
| HOXB8      | -0.615331194 | 0.2277794 | -0.646098211 | 0.2050104 | -2.018353635 | 0.000343 |
| SLC26A11   | -0.075912561 | 0.6912133 | 0.147750461  | 0.4323658 | -0.706974803 | 0.000344 |
| DDX5       | 0.108322526  | 0.2456765 | 0.180486248  | 0.0529697 | 0.333349501  | 0.000351 |
| EFCAB3     | 0.356308136  | 0.4941634 | 0.865719056  | 0.0720899 | 1.632993181  | 0.000388 |
| CA12       | -0.360944682 | 0.5329452 | -0.064280082 | 0.9115012 | -2.062035124 | 0.000395 |
| SLC16A7    | 0.056981742  | 0.8309374 | 0.481031483  | 0.0685076 | 0.926110936  | 0.000455 |
| IL10RB     | 0.3239889    | 0.0723523 | 0.146219694  | 0.4172726 | 0.627381578  | 0.00047  |
| PGM2L1     | 0.232229599  | 0.2745785 | 0.140510633  | 0.508135  | 0.740117424  | 0.000473 |
| GUSBP2     | -0.447978951 | 0.0827923 | -0.379357097 | 0.135763  | -0.900921538 | 0.000554 |
| CAPZA1     | 0.073308754  | 0.2160915 | 0.074584896  | 0.2065991 | 0.203564206  | 0.00056  |
| MYO1D      | 0.158044883  | 0.2511798 | 0.185216473  | 0.1781046 | 0.473010138  | 0.000578 |
| USP16      | 0.103681765  | 0.2636294 | 0.164734444  | 0.0742045 | 0.317315432  | 0.00058  |
| MUC5B      | 0.936402939  | 0.1046015 | 0.889819463  | 0.1229679 | 1.983244946  | 0.000582 |
| GTDC1      | 0.16732578   | 0.2298915 | 0.22201187   | 0.1074336 | 0.472897817  | 0.000593 |
| PRSS1      | 0.726616367  | 0.1700187 | -0.080216799 | 0.879616  | 1.817805214  | 0.000596 |
| TMPRSS15   | 0.232429579  | 0.8430003 | 0.543657187  | 0.6357163 | 3.753154233  | 0.000599 |
| PPAP2A     | 0.281534264  | 0.2187723 | 0.326631086  | 0.1506046 | 0.77415449   | 0.000613 |
| EHMT2      | -0.213010696 | 0.1440207 | -0.201465679 | 0.1650958 | -0.499650473 | 0.00062  |

|            |              |           |              |           |              |          |
|------------|--------------|-----------|--------------|-----------|--------------|----------|
| TIMM23B    | 0.064585573  | 0.412673  | 0.142234673  | 0.0684691 | 0.266267513  | 0.000644 |
| TC2N       | 0.332043225  | 0.1774801 | 0.472927817  | 0.054686  | 0.836740239  | 0.000672 |
| ORM1       | 0.135053072  | 0.7299208 | 0.556063433  | 0.1540646 | 1.322952537  | 0.000681 |
| RAC3       | -0.245800345 | 0.2036734 | -0.167088767 | 0.381975  | -0.665683428 | 0.000698 |
| STEAP1     | 0.273091364  | 0.1731954 | 0.019972667  | 0.9206645 | 0.671765122  | 0.000716 |
| C21orf33   | -0.88518413  | 0.1705832 | -1.121316671 | 0.0833054 | -2.321493425 | 0.000723 |
| ZMAT3      | -0.065960235 | 0.6682243 | -0.182474152 | 0.2351271 | -0.520806783 | 0.000727 |
| RAB11A     | 0.103696309  | 0.2857893 | -0.081000134 | 0.404213  | 0.327547089  | 0.00073  |
| P11-155G14 | 0.066944637  | 0.8650316 | 0.35937541   | 0.3440216 | 1.235523915  | 0.000737 |
| ASIC4      | -0.725940873 | 0.1803039 | -0.5150455   | 0.2957251 | -2.397816333 | 0.000742 |
| PI4K2B     | 0.025828081  | 0.845656  | 0.179531154  | 0.1718765 | 0.440875127  | 0.000745 |
| GNG3       | 0.419744311  | 0.4590019 | -0.124259095 | 0.8297881 | -2.992726928 | 0.000758 |
| LAMA1      | -0.578426272 | 0.0638811 | -0.157329976 | 0.613455  | -1.054204668 | 0.000761 |
| SBF2       | -0.182343036 | 0.4058816 | -0.129415811 | 0.5539007 | -0.737420212 | 0.000785 |
| MGST3      | 0.024398076  | 0.8159817 | 0.024431267  | 0.8149969 | 0.349084941  | 0.000798 |
| UGT2B11    | -0.787118273 | 0.1029629 | 0.149274762  | 0.7528225 | -1.647985074 | 0.000803 |
| C2CD2L     | -0.267413414 | 0.2421355 | -0.143348291 | 0.5263506 | -0.77279846  | 0.000806 |
| COL6A6     | -0.566253792 | 0.2815601 | 0.360329755  | 0.4901744 | -1.781228813 | 0.00081  |
| ARG1       | -0.20928721  | 0.7008264 | -0.479568821 | 0.3817216 | -2.106991438 | 0.000816 |
| EFCAB14    | 0.131156802  | 0.3485073 | 0.031944706  | 0.8194161 | 0.46754298   | 0.000822 |
| TSPAN3     | 0.026776935  | 0.7940197 | 0.04108708   | 0.6885261 | 0.342703131  | 0.000824 |
| HNRNPH2    | -0.023056097 | 0.7686634 | 0.141370948  | 0.0687933 | 0.259607976  | 0.000828 |
| HEATR5A    | 0.246237557  | 0.1547976 | 0.328992341  | 0.0564925 | 0.575557482  | 0.000835 |
| PIP5K1B    | 0.277277546  | 0.4187284 | 0.572169433  | 0.0933204 | 1.132566546  | 0.00086  |
| MFGE8      | 0.061546138  | 0.6360779 | -0.133232377 | 0.3053507 | -0.435464355 | 0.000865 |
| SEPW1      | -0.131764285 | 0.1744343 | -0.172542839 | 0.0742407 | -0.323396788 | 0.000866 |
| PPIC       | 0.196433445  | 0.1918931 | 0.039961665  | 0.7903099 | 0.497281982  | 0.000871 |
| SRP54      | 0.092130047  | 0.3039278 | 0.09009802   | 0.3121317 | 0.29594135   | 0.000877 |
| VTI1A      | 0.166558868  | 0.246469  | 0.274529449  | 0.0547952 | 0.47528517   | 0.000886 |
| DNM3       | 0.599022491  | 0.1328601 | 0.435253929  | 0.2738205 | 1.311764005  | 0.000912 |
| AMFR       | -0.02904637  | 0.7323199 | 0.022706232  | 0.7876698 | 0.27875703   | 0.000927 |
| GABRA4     | -0.737562223 | 0.3959969 | -0.940743981 | 0.2631365 | -2.996054291 | 0.000934 |
| COX6A1     | 0.091025873  | 0.3273804 | 0.037051304  | 0.6895401 | 0.30617357   | 0.000944 |
| EDA2R      | -0.106488696 | 0.6413978 | -0.323613425 | 0.1567882 | -0.766011826 | 0.000945 |
| TMPRSS3    | 0.319412071  | 0.2004492 | 0.023254244  | 0.9258764 | 0.816885498  | 0.000947 |
| SYNE1      | 0.018538191  | 0.9061992 | 0.009821649  | 0.9501542 | -0.520999968 | 0.00096  |
| GALNT6     | 0.491217998  | 0.1121661 | 0.278946344  | 0.3667944 | 1.018511174  | 0.000965 |
| FTSJ1      | 0.141161261  | 0.2127359 | 0.085997794  | 0.4444029 | 0.369576901  | 0.000974 |
| TM9SF3     | 0.021743409  | 0.8050633 | 0.043855654  | 0.6182875 | 0.289669751  | 0.000994 |
| ZNF445     | -0.0574386   | 0.6359907 | -0.140255024 | 0.2445065 | -0.401839548 | 0.001018 |
| SH3RF1     | 0.220818277  | 0.1321344 | -0.015967379 | 0.9132592 | 0.479696229  | 0.001034 |
| CMPK1      | -0.005437357 | 0.9678888 | 0.071753424  | 0.5949014 | 0.442113755  | 0.001042 |
| ZNF780B    | -0.427027092 | 0.0512802 | -0.38337056  | 0.0779027 | -0.718226988 | 0.001047 |
| SPAG1      | 0.309884934  | 0.3138927 | 0.474499794  | 0.1213703 | 1.001477048  | 0.001059 |
| WT1        | -0.592863027 | 0.3905936 | -0.025456702 | 0.9699355 | -2.381238633 | 0.00106  |
| PPP1R1B    | -0.467670775 | 0.4148795 | -0.402792446 | 0.4809498 | -1.932548304 | 0.001062 |
| CHMP3      | -0.018060026 | 0.8646711 | 0.174107558  | 0.0989982 | 0.344868995  | 0.001071 |

|            |              |           |              |           |              |          |
|------------|--------------|-----------|--------------|-----------|--------------|----------|
| CYSTM1     | 0.344260238  | 0.1219781 | 0.115904226  | 0.6026288 | 0.727750263  | 0.001071 |
| NAPG       | -0.00678791  | 0.945927  | 0.119323526  | 0.2307051 | 0.324812556  | 0.001077 |
| TMEM133    | 0.143590882  | 0.3199619 | 0.084034064  | 0.5579203 | 0.461700779  | 0.00116  |
| SLC51A     | -0.362487318 | 0.4308329 | -0.080915821 | 0.86022   | -1.502407111 | 0.001162 |
| P11-400G3  | 0.317001773  | 0.496063  | 0.641499457  | 0.145246  | 1.362995432  | 0.001196 |
| SGMS1      | 0.30071908   | 0.069512  | 0.303491395  | 0.0662724 | 0.533655509  | 0.001197 |
| GFM1       | -0.052855749 | 0.5405567 | 0.119085516  | 0.1626646 | 0.275962092  | 0.001198 |
| CXXC4      | -0.350240644 | 0.2729308 | 0.006772168  | 0.982969  | -1.04455813  | 0.001203 |
| PPM1B      | 0.109201945  | 0.298881  | 0.099561736  | 0.3416264 | 0.337988932  | 0.001214 |
| CD58       | 0.05420649   | 0.7504615 | 0.161990665  | 0.3354724 | 0.540648077  | 0.001222 |
| CCND2      | 0.007992431  | 0.9478941 | -0.144664789 | 0.2367815 | -0.395020075 | 0.001246 |
| TMEM54     | -0.03884943  | 0.8298321 | -0.299622106 | 0.0980355 | 0.572740539  | 0.001252 |
| AIF1       | -0.577166001 | 0.1444294 | 0.032740459  | 0.9290765 | -1.360590382 | 0.001254 |
| TOMM40L    | -0.173731802 | 0.2962214 | -0.05169558  | 0.7536027 | -0.539976891 | 0.001276 |
| COX7A2     | 0.067271396  | 0.4233474 | 0.049787712  | 0.5514854 | 0.268673173  | 0.001279 |
| PKP4       | 0.11928146   | 0.2825957 | 0.128498329  | 0.245544  | 0.355271218  | 0.001303 |
| MPDU1      | 0.129830338  | 0.1922946 | 0.139392596  | 0.1591172 | 0.317090225  | 0.001336 |
| CSTA       | 1.111640148  | 0.3901479 | 0.185308667  | 0.8910447 | 3.870591135  | 0.001339 |
| MICAL2     | 0.388466318  | 0.0743837 | 0.387447622  | 0.0750371 | 0.697517486  | 0.001341 |
| RNY4P13    | -0.236658033 | 0.4491386 | 0.504222127  | 0.0813893 | 0.91202262   | 0.001344 |
| SMAGP      | -0.161453292 | 0.3400778 | 0.042343681  | 0.8007732 | 0.533983896  | 0.00139  |
| MFSD6      | 0.006633771  | 0.9683977 | 0.047346963  | 0.7767594 | 0.532142193  | 0.001392 |
| CBL        | 0.010189801  | 0.9338491 | -0.174395951 | 0.155009  | -0.394015033 | 0.001413 |
| ASGR2      | 0.505696947  | 0.5738869 | 0.773877943  | 0.3869185 | -3.648180875 | 0.001431 |
| MORF4L2    | 0.050550196  | 0.5219979 | 0.020124408  | 0.7986346 | 0.250681162  | 0.001478 |
| LRRTM2     | 0.615716582  | 0.0836036 | 0.447559716  | 0.2071667 | 1.124709741  | 0.001497 |
| GNE        | 0.15986585   | 0.411265  | -0.04080137  | 0.8337878 | 0.615059938  | 0.001501 |
| OMD        | 0.979170869  | 0.2817994 | 0.60263083   | 0.5088661 | 2.826221622  | 0.001513 |
| TSPAN1     | 0.29816023   | 0.1409215 | -0.049663448 | 0.8063263 | 0.641807862  | 0.001513 |
| GLRX3      | 0.079585918  | 0.4312501 | 0.09677367   | 0.335714  | 0.318348498  | 0.001524 |
| ANPEP      | 0.430288966  | 0.6353882 | 1.185428922  | 0.1913821 | -2.88375808  | 0.001533 |
| SURF6      | -0.17860321  | 0.2302746 | -0.21630104  | 0.143186  | -0.470332383 | 0.001581 |
| ZFP82      | -0.292968283 | 0.1134478 | -0.235263931 | 0.1987437 | -0.587245305 | 0.001587 |
| ITIH2      | 0.443238663  | 0.0884751 | 0.120738474  | 0.6426404 | 0.821430502  | 0.00159  |
| CLTA       | 0.102341939  | 0.139919  | 0.10808771   | 0.1163603 | 0.217019909  | 0.001618 |
| PPP6R3     | 0.12385292   | 0.1108647 | 0.112342327  | 0.1472492 | 0.244177454  | 0.001629 |
| ATP6V1G1   | 0.050435347  | 0.560413  | 0.08738275   | 0.3110586 | 0.27139357   | 0.001634 |
| P11-347C12 | -0.218744669 | 0.5265297 | -0.303443239 | 0.3720626 | -1.163452779 | 0.001634 |
| SLC35A2    | 0.220834646  | 0.1252277 | 0.068152535  | 0.6358039 | 0.450661993  | 0.001644 |
| GLCE       | 0.149298786  | 0.1924931 | 0.141110829  | 0.2162015 | 0.358221967  | 0.001668 |
| ZNF562     | -0.039542883 | 0.8099506 | 0.036652293  | 0.8217972 | -0.516345841 | 0.001677 |
| ANXA13     | -0.053833206 | 0.925363  | 0.504729593  | 0.3790834 | -1.817107522 | 0.001691 |
| DPEP1      | 0.076079836  | 0.9202243 | 0.457622445  | 0.5393587 | -3.185154293 | 0.00169  |
| C5orf15    | 0.048499134  | 0.6975003 | 0.160997775  | 0.1953858 | 0.390056964  | 0.001705 |
| BLVRB      | 0.0668546    | 0.666134  | -0.158804275 | 0.3054704 | 0.48321981   | 0.001709 |
| SLC44A4    | 0.253896174  | 0.0922537 | -0.016579124 | 0.9124875 | 0.471525591  | 0.001756 |
| PLEKHG2    | 0.045421512  | 0.8018726 | -0.102172321 | 0.5721355 | -0.566397376 | 0.001794 |

|           |              |           |              |           |              |          |
|-----------|--------------|-----------|--------------|-----------|--------------|----------|
| PPP1R16A  | -0.043942358 | 0.7659815 | -0.072992738 | 0.6210278 | -0.461833947 | 0.001818 |
| GBP3      | 0.330983544  | 0.0670376 | 0.260076447  | 0.1495914 | 0.562386335  | 0.00182  |
| CTTN      | 0.081531835  | 0.1943019 | -0.088872861 | 0.1567411 | 0.194797172  | 0.001854 |
| KCNJ16    | 0.589465886  | 0.0697134 | 0.240365069  | 0.4601124 | 1.009938703  | 0.001859 |
| SREBF1    | 0.113709171  | 0.380904  | 0.183352392  | 0.1562704 | 0.401723619  | 0.001867 |
| TAGLN2    | 0.216152364  | 0.1426422 | -0.199668092 | 0.1758506 | 0.458150048  | 0.001872 |
| S100P     | 0.460900369  | 0.1585135 | -0.240350358 | 0.4623545 | 1.010403838  | 0.001977 |
| FOXN2     | 0.12457352   | 0.3718005 | 0.08116724   | 0.5597476 | 0.429124241  | 0.001997 |
| LRRC19    | 0.119617487  | 0.803504  | 0.313984196  | 0.5127463 | -1.497859215 | 0.001998 |
| CYBB      | 0.35916429   | 0.315735  | 0.22977469   | 0.5186047 | 1.074649198  | 0.002006 |
| RNF103    | 0.193388546  | 0.2318658 | 0.200088158  | 0.2153988 | 0.498009362  | 0.002012 |
| HOXB6     | -0.423300184 | 0.2217104 | -0.176173005 | 0.6079648 | -1.086009818 | 0.002024 |
| SLC26A2   | -0.148718823 | 0.5588597 | 0.076956289  | 0.7618038 | -0.788050437 | 0.002026 |
| GLRX      | -0.014097974 | 0.9343037 | -0.047765128 | 0.7783314 | -0.53558968  | 0.002032 |
| ATF7IP    | -0.144382773 | 0.1982263 | 0.019938402  | 0.8586443 | -0.346238043 | 0.00204  |
| MAP7D2    | 0.552238283  | 0.1328045 | 0.22408886   | 0.5429753 | 1.109175588  | 0.002039 |
| RNF144B   | -0.057414108 | 0.8908037 | 0.074940116  | 0.8571263 | 1.274199826  | 0.002037 |
| ATP11B    | -0.082333373 | 0.4013905 | -0.114821506 | 0.2417292 | 0.301442153  | 0.002075 |
| POMK      | -0.297885044 | 0.0821274 | -0.30293065  | 0.075053  | -0.52860238  | 0.002098 |
| PCDHA9    | -0.283161447 | 0.2300568 | -0.20138994  | 0.3843194 | -0.742521897 | 0.002099 |
| C1orf115  | -0.414001931 | 0.3201817 | 0.057731448  | 0.8893439 | -1.288709814 | 0.002103 |
| GPR111    | 0.346999022  | 0.4221473 | 0.317117578  | 0.4590852 | 1.297913042  | 0.002103 |
| CFH       | 0.386945597  | 0.1062234 | 0.125744693  | 0.599615  | 0.735005803  | 0.002138 |
| C14orf105 | -0.336635249 | 0.2227903 | -0.33859527  | 0.219233  | -0.849096333 | 0.002144 |
| ANXA3     | 0.133431653  | 0.2701185 | 0.035562427  | 0.7685486 | 0.368692276  | 0.002237 |
| KLHL31    | -0.560460627 | 0.0993816 | -0.535334688 | 0.1095278 | -1.068975422 | 0.002237 |
| CLCN2     | 0.050735048  | 0.8464003 | -0.063814206 | 0.8055566 | -0.804414351 | 0.002286 |
| CSNK2A1   | -0.017648716 | 0.8710001 | -0.183778626 | 0.0906372 | -0.331683972 | 0.002288 |
| NAGS      | -0.761993091 | 0.0652536 | -0.027590202 | 0.9436689 | -1.302579083 | 0.002318 |
| IL37      | 0.261273086  | 0.7726016 | 0.042395646  | 0.9626312 | -3.460635901 | 0.002325 |
| NLGN1     | 0.317881545  | 0.2577708 | 0.405733105  | 0.148393  | 0.851018973  | 0.002347 |
| KLHL20    | -0.153933904 | 0.1995853 | -0.220691857 | 0.0646867 | -0.365587521 | 0.002367 |
| TMBIM4    | 0.092404623  | 0.3965441 | 0.071597445  | 0.5096324 | 0.329339472  | 0.002371 |
| PLOD1     | 0.111893838  | 0.401698  | -0.186786863 | 0.1616254 | -0.405696834 | 0.002388 |
| DNAH5     | 0.242498321  | 0.3584151 | 0.282749089  | 0.2850027 | 0.793795426  | 0.002399 |
| MSL2      | -0.004347141 | 0.9692674 | -0.151056463 | 0.1795174 | -0.34225114  | 0.002396 |
| ZFHX2     | -0.305627105 | 0.5909367 | -0.720204565 | 0.2030564 | -1.740213617 | 0.002399 |
| ALDOB     | -0.121923463 | 0.892075  | 1.054557956  | 0.2403316 | -2.736918841 | 0.002429 |
| SLMO2     | -0.004773363 | 0.9639462 | 0.055624083  | 0.5970213 | 0.318213645  | 0.002458 |
| MMP10     | 0.40511013   | 0.5374177 | 0.588029508  | 0.3698921 | 1.979551554  | 0.002467 |
| CDX2      | -0.586958213 | 0.1207636 | -0.711812002 | 0.0595277 | -1.147209663 | 0.002473 |
| ITSN2     | 0.26214168   | 0.1733106 | 0.200660304  | 0.2963347 | 0.580327077  | 0.002474 |
| MAU2      | -0.134456113 | 0.2288564 | -0.181128074 | 0.1034298 | -0.337249003 | 0.002472 |
| SRI       | 0.03469051   | 0.7066979 | 0.085005517  | 0.3541257 | 0.27721592   | 0.002475 |
| ZNF462    | -0.180564995 | 0.3177395 | -0.069222386 | 0.7011922 | -0.547154187 | 0.002507 |
| ZNF891    | -0.258881106 | 0.0966764 | -0.226620584 | 0.1424039 | -0.472204475 | 0.002509 |
| SYDE2     | -0.02420025  | 0.8750994 | 0.076308149  | 0.6181421 | -0.467454012 | 0.002548 |

|            |              |           |              |           |              |          |
|------------|--------------|-----------|--------------|-----------|--------------|----------|
| DAD1       | 0.100881426  | 0.2061282 | 0.145188349  | 0.0670354 | 0.239200077  | 0.002562 |
| MASTL      | 0.111021362  | 0.4006537 | 0.15715561   | 0.2318083 | 0.395798731  | 0.002562 |
| ZNF148     | -0.07816002  | 0.3007259 | -0.112469945 | 0.1346775 | -0.227111987 | 0.002602 |
| PARM1      | -0.344008346 | 0.2262979 | 0.049530009  | 0.8616261 | -0.855203766 | 0.002642 |
| LRRC39     | -0.304464844 | 0.7054441 | 0.187459543  | 0.8135826 | -2.701577087 | 0.002664 |
| CHRNA5     | -0.430886506 | 0.1315371 | 0.333135122  | 0.2333681 | -0.859873092 | 0.002699 |
| MPZL2      | 0.120742181  | 0.4175249 | -0.057025947 | 0.7016084 | 0.445252199  | 0.002726 |
| P11-474D14 | -0.716619764 | 0.1280815 | 0.054585973  | 0.8967257 | -1.5898124   | 0.002735 |
| ZNF219     | -0.261600956 | 0.2536001 | -0.180927429 | 0.4268718 | -0.690196153 | 0.002736 |
| AP000347.2 | 0.047376125  | 0.7928878 | -0.065785605 | 0.7135704 | -0.547376715 | 0.00274  |
| GABRE      | -0.393553595 | 0.3160568 | -0.375912958 | 0.3371046 | -1.184261103 | 0.002784 |
| SCGB1A1    | -1.707282547 | 0.3018517 | 1.110457843  | 0.4167965 | 3.968568638  | 0.002801 |
| GSDMB      | 0.159892587  | 0.4417041 | -0.205098252 | 0.3238029 | 0.616501937  | 0.002816 |
| PIK3R2     | -0.219768972 | 0.1639027 | -0.087191221 | 0.5782613 | -0.472466838 | 0.002827 |
| PTPRD      | 0.349280105  | 0.1442603 | 0.280886332  | 0.2400747 | 0.71196142   | 0.002869 |
| MXD4       | -0.035416442 | 0.7793054 | -0.22802876  | 0.0715459 | -0.378546983 | 0.002885 |
| SPATA17    | -0.485256598 | 0.0922411 | -0.306438099 | 0.278707  | -0.878832932 | 0.002918 |
| ZNF334     | -0.232620386 | 0.3379461 | -0.318986529 | 0.187335  | -0.728400993 | 0.002933 |
| ATHL1      | -0.078004826 | 0.6750752 | -0.238706395 | 0.1998934 | -0.556482158 | 0.002938 |
| DIABLO     | 0.023076851  | 0.7794104 | 0.141589008  | 0.0812335 | 0.241270755  | 0.002943 |
| MCFD2      | -0.135591572 | 0.1222154 | -0.087001802 | 0.3200393 | -0.26080144  | 0.002949 |
| SYT14      | 1.359015575  | 0.0704376 | 1.190012372  | 0.1102484 | 2.171775168  | 0.00298  |
| KIF27      | -0.217789403 | 0.1856072 | -0.137858015 | 0.390605  | -0.48828488  | 0.002983 |
| ZKSCAN3    | -0.17245489  | 0.2781942 | 0.124395937  | 0.4207473 | -0.475802953 | 0.002995 |
| RAB8B      | 0.085662483  | 0.6003698 | 0.26708138   | 0.1021778 | 0.4842687    | 0.00302  |
| GLRX5      | -0.088476308 | 0.2903785 | 0.08790512   | 0.2853293 | 0.243285244  | 0.003046 |
| ZNF408     | 0.020671931  | 0.9176184 | -0.288430689 | 0.1517215 | -0.606433296 | 0.003062 |
| SAT2       | -0.267464497 | 0.0655294 | -0.26192105  | 0.0690032 | -0.430010243 | 0.00307  |
| APOM       | 0.012282884  | 0.97906   | 0.164416568  | 0.7247765 | -1.399408322 | 0.003129 |
| NUDT14     | -0.058543217 | 0.7002604 | -0.08276504  | 0.5786211 | -0.459702982 | 0.003145 |
| ADH1B      | 1.581385769  | 0.1483786 | 1.992402981  | 0.0570399 | 3.03937745   | 0.00316  |
| AVPI1      | 0.052353262  | 0.8538502 | -0.359781367 | 0.207544  | -0.859205935 | 0.00316  |
| REPS1      | -0.162895176 | 0.157673  | -0.123745409 | 0.281412  | -0.339792801 | 0.003204 |
| ZNF784     | 0.107351957  | 0.5359903 | -0.032490712 | 0.8501719 | -0.535616473 | 0.003209 |
| CHMP2B     | 0.125678293  | 0.3081964 | 0.077754483  | 0.5276434 | 0.361890571  | 0.003241 |
| SQRDL      | 0.056210791  | 0.7224117 | 0.063447697  | 0.6874541 | 0.462296813  | 0.003277 |
| ZSCAN12P1  | -0.374095048 | 0.2758211 | 0.050631678  | 0.8782912 | -1.050985225 | 0.003314 |
| TM9SF2     | 0.100717446  | 0.3153877 | 0.132481355  | 0.1862135 | 0.293589067  | 0.003379 |
| GNL2       | 0.082395912  | 0.5562558 | 0.226893878  | 0.1047528 | 0.409592939  | 0.003386 |
| RELL1      | 0.223388267  | 0.1320726 | 0.004896029  | 0.9736561 | 0.430634476  | 0.003438 |
| C19orf69   | 0.119200054  | 0.894848  | 0.524237569  | 0.5555844 | -3.521557973 | 0.003446 |
| WNK4       | 0.527506545  | 0.2591342 | -0.011192453 | 0.9809385 | -1.422787102 | 0.003499 |
| EPT1       | 0.187907277  | 0.0799199 | 0.097910922  | 0.3602799 | 0.312110548  | 0.003519 |
| ORAI3      | -0.039894016 | 0.7881548 | -0.26785933  | 0.0723398 | -0.438163215 | 0.003519 |
| SIRT4      | -0.494799457 | 0.2208072 | -0.269700031 | 0.4728848 | -1.233915017 | 0.003518 |
| CD82       | 0.397242372  | 0.1422552 | 0.355148938  | 0.1869189 | 0.78245362   | 0.003527 |
| GJA3       | 1.579533422  | 0.0692455 | 0.152782281  | 0.86923   | 2.462724597  | 0.003561 |

|            |              |           |              |           |              |          |
|------------|--------------|-----------|--------------|-----------|--------------|----------|
| NDST4      | 0.615144299  | 0.724436  | 1.755254535  | 0.2949789 | 4.708266854  | 0.003559 |
| UBE2N      | 0.04655448   | 0.5897247 | 0.137649521  | 0.1090664 | 0.250629629  | 0.003563 |
| PITPNB     | 0.313691791  | 0.063423  | 0.198373483  | 0.2398251 | 0.490842414  | 0.00357  |
| KIF28P     | -0.269495678 | 0.613696  | -0.282883936 | 0.5869259 | -1.601759367 | 0.003577 |
| 3HD14A-AC  | -0.380583808 | 0.5750953 | -0.463538489 | 0.4903785 | -2.458147161 | 0.003587 |
| SENP7      | -0.123203814 | 0.3614337 | 0.012560447  | 0.9255836 | -0.393589929 | 0.003597 |
| EDRF1      | -0.267305551 | 0.05244   | -0.165069661 | 0.2265617 | -0.399745639 | 0.003611 |
| C16orf70   | -0.059554377 | 0.5902492 | -0.180819488 | 0.0980536 | -0.325165226 | 0.003649 |
| NPRL3      | -0.554669186 | 0.0911895 | 0.158108438  | 0.6195408 | -1.010625486 | 0.003676 |
| SPINK1     | 0.418769312  | 0.0669615 | -0.274892135 | 0.2291849 | 0.662975081  | 0.003726 |
| PPTC7      | 0.203696747  | 0.1579421 | 0.122076046  | 0.3967087 | 0.415829698  | 0.003743 |
| CDR1       | 0.647620736  | 0.1236497 | -0.562258359 | 0.1937808 | -1.306703924 | 0.003801 |
| C19orf43   | 0.189315226  | 0.0657873 | 0.125811904  | 0.2201198 | 0.296545006  | 0.003813 |
| AFF1       | 0.131845393  | 0.4100326 | -0.179581685 | 0.2618687 | -0.462910428 | 0.003826 |
| LRRC59     | 0.222579358  | 0.0506075 | 0.128488712  | 0.2587359 | 0.328233324  | 0.003894 |
| KRBA2      | -0.258258273 | 0.2183449 | -0.115990694 | 0.5693094 | -0.615350616 | 0.003914 |
| ABHD16B    | 0.462365662  | 0.068912  | 0.371026152  | 0.1398367 | 0.712354316  | 0.003927 |
| TENM2      | 0.769573806  | 0.2855231 | 1.025496306  | 0.1544025 | 2.069557524  | 0.003947 |
| ANKRD22    | 0.259602003  | 0.2309452 | 0.203584266  | 0.3472084 | 0.62155399   | 0.003969 |
| TTC5       | -0.159958734 | 0.3272257 | -0.264726942 | 0.1034679 | -0.469371841 | 0.00398  |
| BCL2L1     | -0.032561374 | 0.8411432 | -0.317475054 | 0.050705  | -0.46833578  | 0.003983 |
| P11-254B13 | 1.005991632  | 0.1387541 | 0.756422593  | 0.2662439 | 1.831827821  | 0.004    |
| CADPS2     | 0.238145223  | 0.2907572 | 0.358950843  | 0.1099067 | 0.64429355   | 0.004038 |
| DCAF15     | -0.09938946  | 0.5212107 | -0.173053935 | 0.2612818 | -0.445522909 | 0.004135 |
| TMEM150B   | -0.575184731 | 0.337425  | -0.044051674 | 0.9400604 | -1.79753245  | 0.004141 |
| YES1       | -0.008602893 | 0.9242564 | -0.021568673 | 0.8112309 | 0.258342021  | 0.004176 |
| FMO1       | 0.637203087  | 0.611721  | 1.525296537  | 0.2115841 | 3.412261551  | 0.004185 |
| CKMT1B     | 0.292897536  | 0.1704608 | 0.191313347  | 0.3699055 | 0.608476675  | 0.004207 |
| DLD        | -0.0061815   | 0.9387428 | 0.086733311  | 0.2774501 | 0.228621922  | 0.004203 |
| TAF3       | -0.082042798 | 0.5990596 | -0.245011345 | 0.115138  | -0.451764052 | 0.004209 |
| RBFOX3     | -0.329180147 | 0.4225941 | -0.494877294 | 0.2296875 | -1.235570104 | 0.004213 |
| KCTD9      | 0.036755569  | 0.7082728 | 0.168593679  | 0.0839417 | 0.277382909  | 0.004254 |
| UBXN7      | 0.005747617  | 0.9679663 | -0.033169963 | 0.8164922 | -0.40892382  | 0.004304 |
| CENPJ      | -0.262786606 | 0.0564282 | -0.132575773 | 0.3325981 | -0.392630396 | 0.004326 |
| FAM118A    | -0.133833707 | 0.304761  | -0.163108069 | 0.2087922 | -0.372091891 | 0.004393 |
| PADI2      | -0.679770749 | 0.1754021 | -0.669013623 | 0.1812272 | -1.437527169 | 0.004409 |
| LGI4       | -0.419053494 | 0.4554246 | -0.353504786 | 0.5277652 | -1.615416135 | 0.004416 |
| PLS1       | 0.220657263  | 0.1301852 | -0.050059559 | 0.7313476 | 0.414187302  | 0.004451 |
| MTMR2      | 0.172946273  | 0.0719234 | 0.009085704  | 0.924519  | 0.272119314  | 0.004468 |
| MLH1       | -0.098106946 | 0.508979  | 0.243298106  | 0.099587  | 0.419920535  | 0.004451 |
| URAD       | -0.216643394 | 0.8384207 | 0.338906983  | 0.7475451 | -3.46715304  | 0.004512 |
| P11-39K24  | 1.250084799  | 0.1028003 | 1.03612719   | 0.1756867 | 2.073869026  | 0.00453  |
| ARID1A     | -0.136654471 | 0.4734612 | -0.336048679 | 0.078129  | -0.541666048 | 0.004536 |
| SMIM3      | -0.15780844  | 0.4716747 | -0.212091714 | 0.3324101 | -0.62393485  | 0.004596 |
| TSC22D2    | 0.19316114   | 0.1294393 | 0.178912458  | 0.1591488 | 0.360109145  | 0.004602 |
| KLF4       | 0.201302445  | 0.5066811 | 0.139589552  | 0.6449577 | 0.856032835  | 0.004605 |
| RHOC       | 0.16104525   | 0.2186108 | 0.050863586  | 0.6974646 | 0.370081838  | 0.004641 |



|            |              |           |              |           |              |          |
|------------|--------------|-----------|--------------|-----------|--------------|----------|
| VAV3       | -0.815438537 | 0.0569761 | 0.287490981  | 0.4940354 | -1.262822533 | 0.004655 |
| NGF        | 1.554852795  | 0.1006067 | 0.844985021  | 0.3822312 | 2.594017712  | 0.004681 |
| SLC7A11    | 0.332282078  | 0.1766394 | 0.441870945  | 0.0721156 | 0.694363354  | 0.004709 |
| DHRS7      | -0.017581615 | 0.8940798 | -0.053706162 | 0.683216  | 0.37033659   | 0.004745 |
| STX19      | 0.635218449  | 0.1646164 | -0.309135368 | 0.5207076 | 1.242248569  | 0.004838 |
| HIPK3      | 0.074169961  | 0.3639676 | 0.10671595   | 0.1903813 | 0.229352681  | 0.004872 |
| P11-453E17 | -0.433035046 | 0.0570767 | -0.222333298 | 0.3059034 | -0.645998465 | 0.004913 |
| C8G        | -0.4689138   | 0.5935421 | 0.974264989  | 0.2525729 | -2.85323441  | 0.00493  |
| XKR8       | -0.201853021 | 0.3486836 | -0.400049968 | 0.0615151 | -0.61275373  | 0.004949 |
| DDX60      | 0.151335987  | 0.4759729 | 0.098155748  | 0.6421521 | 0.591764901  | 0.004961 |
| CCDC47     | 0.131437087  | 0.2875805 | 0.134911559  | 0.2740668 | 0.346058903  | 0.004968 |
| EID2       | -0.216834686 | 0.1814373 | -0.238242516 | 0.1365868 | -0.458761679 | 0.004998 |
| GIPC1      | 0.033909145  | 0.7896913 | 0.038217404  | 0.7631674 | 0.354893768  | 0.005028 |
| MOGAT3     | -0.474358908 | 0.3061506 | -0.166168345 | 0.7177241 | -1.316723125 | 0.005051 |
| MYH8       | -1.062391976 | 0.3338987 | -1.747420879 | 0.1155171 | -3.352010784 | 0.005145 |
| AMD1       | 0.072697372  | 0.5554692 | 0.09737397   | 0.429292  | 0.344258088  | 0.005179 |
| ST14       | 0.227339251  | 0.2040147 | 0.273257698  | 0.1267259 | 0.499917335  | 0.005185 |
| MMP14      | 0.330302608  | 0.0537385 | 0.322157325  | 0.0597334 | 0.478208495  | 0.00519  |
| DISP1      | -0.162141675 | 0.3682124 | -0.011508922 | 0.9488134 | -0.506972486 | 0.005211 |
| ZCCHC11    | -0.18655161  | 0.0713729 | -0.050807797 | 0.6220053 | -0.288838521 | 0.005212 |
| OR13K1P    | 1.280098018  | 0.1139005 | 1.141942371  | 0.1565667 | 2.181320358  | 0.005218 |
| DDX39A     | 0.28345349   | 0.0615423 | 0.146491783  | 0.332959  | 0.421498088  | 0.005229 |
| NAPB       | -0.234585894 | 0.1811184 | -0.341710024 | 0.0503698 | -0.492100983 | 0.00523  |
| ZNF506     | -0.024271355 | 0.8420869 | -0.09556706  | 0.4294349 | -0.340309185 | 0.005239 |
| TINAG      | -0.305905323 | 0.5498866 | 0.668204167  | 0.1842963 | -1.492025986 | 0.005251 |
| VSIG2      | 0.277495432  | 0.3661526 | -0.093034534 | 0.7619488 | 0.856025613  | 0.005271 |
| CLIC1      | 0.183928812  | 0.1181185 | -0.027893448 | 0.8126529 | 0.328051085  | 0.005293 |
| HSPD1P6    | 0.762737296  | 0.1126409 | 0.76739207   | 0.0953242 | 1.280634365  | 0.005292 |
| PPP1R3F    | 0.192486855  | 0.5644532 | -0.329641819 | 0.3240643 | -0.9463801   | 0.005335 |
| FKBP10     | -0.016808203 | 0.9192484 | 0.024164801  | 0.8840556 | -0.46207154  | 0.005356 |
| ZNF528     | -0.025492757 | 0.9363035 | 0.002808331  | 0.9930019 | -0.915705631 | 0.005371 |
| ACIN1      | 0.090478343  | 0.1979057 | -0.099339227 | 0.157263  | -0.195613433 | 0.005428 |
| C1orf145   | -0.003397763 | 0.9925939 | -0.346183357 | 0.3468314 | -1.045257163 | 0.005437 |
| SLC23A3    | -0.356990159 | 0.2679381 | -0.205031625 | 0.5198099 | -0.903476801 | 0.005465 |
| EFR3A      | -0.045227649 | 0.5393804 | 0.040797346  | 0.5774787 | 0.202880122  | 0.005504 |
| MASP2      | -0.214675542 | 0.2786067 | 0.00737864   | 0.9692447 | -0.560049838 | 0.005518 |
| P11-113D6  | -0.312794569 | 0.116411  | -0.258880465 | 0.1820487 | -0.558875571 | 0.005523 |
| ZFP90      | -0.275967329 | 0.0744202 | 0.016020705  | 0.9161032 | -0.42541986  | 0.005572 |
| ASPHD2     | -0.057042605 | 0.7796151 | 0.231625756  | 0.2407279 | 0.541381836  | 0.005593 |
| GATS       | -0.302155652 | 0.1678372 | -0.234081353 | 0.2816975 | -0.610866584 | 0.005589 |
| GUK1       | 0.165720079  | 0.1061003 | 0.036380218  | 0.7221177 | 0.282545585  | 0.005627 |
| ZRANB2     | -0.190972792 | 0.0645183 | -0.183974831 | 0.073927  | -0.285272857 | 0.005733 |
| SLC1A1     | -0.23491267  | 0.5507867 | 0.202664695  | 0.6053395 | -1.091101135 | 0.005761 |
| ZSWIM5     | -0.238883831 | 0.2472726 | -0.243846522 | 0.232615  | -0.575042255 | 0.005832 |
| LNP1       | -0.427028893 | 0.0725144 | -0.296901486 | 0.1989989 | -0.661329407 | 0.005853 |
| NRN1       | -0.865757622 | 0.5303168 | -1.22518108  | 0.3795976 | -4.638136705 | 0.005881 |
| SLCO2B1    | -0.460658573 | 0.2526366 | -0.352499608 | 0.3808497 | -1.111722345 | 0.00588  |

|            |              |           |              |           |              |          |
|------------|--------------|-----------|--------------|-----------|--------------|----------|
| APAF1      | -0.007827636 | 0.9595283 | -0.054238245 | 0.7246669 | 0.42352737   | 0.005889 |
| DTWD2      | 0.004890134  | 0.9755185 | 0.01466755   | 0.925253  | 0.427710769  | 0.005887 |
| KCTD1      | -0.336658985 | 0.0830855 | 0.096082436  | 0.6130057 | -0.536766887 | 0.005989 |
| ZNF862     | -0.311817416 | 0.2577588 | -0.242227108 | 0.3792894 | -0.763775089 | 0.006013 |
| CNOT4      | -0.000561624 | 0.9964054 | -0.039053808 | 0.753502  | -0.343586606 | 0.006036 |
| MAP3K5     | 0.047136765  | 0.8806047 | -0.408626426 | 0.1934141 | 0.855946958  | 0.006044 |
| SPG7       | -0.181532838 | 0.092162  | -0.178681195 | 0.0965358 | -0.295519058 | 0.006043 |
| MAP3K2     | 0.205107702  | 0.0519596 | -0.012177439 | 0.9079481 | 0.288745802  | 0.006065 |
| MGAM       | 0.971860794  | 0.0515862 | -0.732805582 | 0.1448321 | 1.367557207  | 0.006071 |
| AAGAB      | 0.004517956  | 0.9690232 | 0.044796608  | 0.6989009 | 0.316628306  | 0.006088 |
| POF1B      | 0.32132315   | 0.0557132 | 0.20441464   | 0.2234242 | 0.460300329  | 0.006102 |
| EFCAB4B    | 0.359136975  | 0.2974947 | 0.38722098   | 0.2557997 | 0.924606856  | 0.006191 |
| CA3        | -0.216987259 | 0.5088857 | 0.014174407  | 0.9640533 | -0.9482263   | 0.006212 |
| XPNPEP2    | 0.594462053  | 0.3651639 | 0.311077548  | 0.6346346 | -1.859414312 | 0.006217 |
| DHRS9      | -0.554566573 | 0.4319794 | -0.20105192  | 0.774644  | -1.948646366 | 0.00626  |
| P11-139J15 | 0.339160697  | 0.6224869 | -0.190876884 | 0.7842931 | -2.323189488 | 0.006257 |
| AQP11      | -0.026380263 | 0.9338501 | -0.264751567 | 0.401194  | -0.899009171 | 0.0063   |
| FASTKD2    | 0.064990609  | 0.5524928 | 0.165283401  | 0.1282644 | 0.296759726  | 0.006325 |
| FAM69B     | 0.012727306  | 0.9344409 | -0.14082397  | 0.361052  | -0.427142831 | 0.006329 |
| RGS17      | -0.127162102 | 0.6480848 | -0.393182304 | 0.1570297 | -0.767211615 | 0.006363 |
| PAPSS2     | -0.252614442 | 0.3159785 | -0.106742887 | 0.6708367 | -0.689333625 | 0.006386 |
| TYMP       | 0.492113409  | 0.0582321 | 0.502686917  | 0.050438  | 0.699149758  | 0.00641  |
| RPN1       | 0.048560608  | 0.5926808 | 0.128044264  | 0.1579234 | 0.247049404  | 0.00642  |
| CCNL2      | -0.004139459 | 0.9760154 | -0.257599901 | 0.0612543 | -0.375352201 | 0.006433 |
| TERF1      | -0.090817106 | 0.4752607 | -0.045396036 | 0.72003   | -0.3476312   | 0.006438 |
| RGCC       | 0.474218965  | 0.6363851 | 0.405524403  | 0.6867805 | 2.634830153  | 0.006462 |
| FCF1P2     | -0.436538692 | 0.0648517 | -0.238908516 | 0.2932378 | -0.648797024 | 0.006472 |
| CDC73      | -0.160295672 | 0.1434523 | -0.118352867 | 0.2777131 | -0.297939661 | 0.006476 |
| WDR20      | -0.105222762 | 0.3889483 | -0.194624826 | 0.1109547 | -0.333054843 | 0.006498 |
| CSNK1A1    | 0.049602796  | 0.4629285 | 0.120215334  | 0.0745144 | 0.183364797  | 0.00651  |
| TBC1D8     | 0.072476067  | 0.5196339 | 0.087572706  | 0.4344143 | 0.302242544  | 0.006511 |
| ANXA5      | -0.042406615 | 0.7262344 | 0.181234241  | 0.1340991 | 0.328886429  | 0.006549 |
| LMO4       | -0.12162629  | 0.2559111 | -0.196035055 | 0.0664783 | -0.29107602  | 0.006549 |
| WWP2       | 0.098793538  | 0.373309  | 0.185180208  | 0.0919476 | 0.298697599  | 0.00655  |
| SHOX2      | 2.476292798  | 0.0897801 | 1.495600705  | 0.3073521 | 3.948068871  | 0.00656  |
| ANGPTL2    | 0.001165711  | 0.995813  | -0.289214717 | 0.1941285 | -0.607429632 | 0.006593 |
| AP3S2      | -0.053797824 | 0.7990625 | -0.038311867 | 0.8558473 | -0.575331834 | 0.006595 |
| CD151      | 0.030912655  | 0.7570085 | -0.103215623 | 0.3008893 | 0.270131086  | 0.006585 |
| LRRFIP2    | 0.090999846  | 0.3903121 | 0.016898227  | 0.8721215 | 0.284331586  | 0.006588 |
| TM2D2      | 0.17553057   | 0.1725713 | -0.051337007 | 0.6891339 | 0.346962116  | 0.006626 |
| RUFY3      | 0.167518663  | 0.1059426 | 0.020209827  | 0.8445013 | 0.278501262  | 0.006649 |
| ZNF79      | -0.322933095 | 0.1974313 | -0.398797986 | 0.1097542 | -0.68375837  | 0.006694 |
| C12orf79   | 0.772018332  | 0.194905  | -0.308025275 | 0.6289059 | 1.571938332  | 0.006709 |
| FAM3B      | 0.051058566  | 0.8590906 | -0.180579091 | 0.5299832 | 0.769862021  | 0.006744 |
| LGALS14    | 0.052169712  | 0.9393556 | 0.669676367  | 0.3169974 | -2.145322786 | 0.006779 |
| TTC4P1     | -1.377055696 | 0.0772801 | -0.340513955 | 0.6280749 | -2.364989014 | 0.006784 |
| ACKR4      | 0.223135785  | 0.6549606 | -0.541784764 | 0.2846199 | 1.321011047  | 0.006818 |

|            |              |           |              |           |              |          |
|------------|--------------|-----------|--------------|-----------|--------------|----------|
| SEH1L      | 0.046119004  | 0.7055567 | 0.168668864  | 0.1653965 | 0.328661806  | 0.006867 |
| TAB1       | -0.137626999 | 0.3414439 | -0.267346751 | 0.0629419 | -0.391334428 | 0.006954 |
| DBNL       | 0.059420458  | 0.5893006 | 0.045741752  | 0.6769581 | 0.295625634  | 0.00699  |
| POLD2      | -0.496720158 | 0.0860988 | -0.503325327 | 0.0787553 | -0.781500395 | 0.006981 |
| UBE2L3     | -0.052009523 | 0.5762251 | 0.131350822  | 0.1557651 | 0.249527987  | 0.006989 |
| PLEKHG5    | 0.015220241  | 0.9212912 | -0.021877623 | 0.8864938 | -0.419710281 | 0.007    |
| HOMER2     | 0.32638911   | 0.4540314 | 0.537999731  | 0.2147749 | 1.167579273  | 0.007009 |
| ZNF660     | -0.258846381 | 0.197831  | 0.087175168  | 0.6588953 | -0.543184364 | 0.007048 |
| P11-296110 | -0.128054344 | 0.4568274 | -0.146111638 | 0.3924373 | -0.467754753 | 0.007061 |
| CP         | 0.417718696  | 0.0683949 | 0.309904137  | 0.1763629 | 0.617053053  | 0.007097 |
| APOE       | -0.113119658 | 0.6345915 | 0.203705305  | 0.3903504 | -0.643865123 | 0.007168 |
| CCPG1      | 0.008332487  | 0.9568606 | 0.056465133  | 0.7129601 | 0.411970797  | 0.007165 |
| ZFP91      | 0.068532405  | 0.3086205 | -0.017181236 | 0.7978873 | 0.179952086  | 0.007201 |
| DPYSL2     | 0.136686122  | 0.1561941 | -0.036052053 | 0.7082823 | -0.259354762 | 0.00721  |
| DNAJC10    | 0.013639476  | 0.8991076 | -0.029342174 | 0.7845645 | 0.288109892  | 0.007268 |
| LSAMP      | 0.012147079  | 0.9524904 | 0.324091075  | 0.1113606 | -0.549472153 | 0.007261 |
| ZNF155     | -0.318009669 | 0.1138547 | -0.241193219 | 0.2252797 | -0.541050351 | 0.007245 |
| ASGR1      | -0.213405562 | 0.5711043 | 0.205763007  | 0.5787294 | -1.033889833 | 0.007297 |
| HSD17B12   | 0.233763095  | 0.0537329 | 0.149581955  | 0.2164968 | 0.324633304  | 0.007309 |
| TRIM59     | -0.176162291 | 0.1854246 | -0.063059061 | 0.6321378 | -0.356016368 | 0.007394 |
| SNRPB      | 0.230100804  | 0.0807866 | 0.090268039  | 0.492959  | 0.351801367  | 0.00746  |
| SEMA5A     | -0.062655279 | 0.8459475 | -0.202298877 | 0.5301404 | -0.86425254  | 0.007509 |
| NGFR       | 0.678755385  | 0.324695  | 0.051663102  | 0.9404065 | 1.824325214  | 0.007515 |
| KIAA1755   | 0.700369998  | 0.2861898 | 0.427759599  | 0.5145342 | 1.722598605  | 0.007539 |
| P11-182110 | 1.399532747  | 0.0523084 | 1.16006699   | 0.107818  | 1.855589954  | 0.007605 |
| SLX4       | -0.153328388 | 0.2894506 | -0.167082618 | 0.2452092 | -0.388075006 | 0.007713 |
| TFEC       | 0.059015773  | 0.9452566 | 1.137369099  | 0.1799317 | -2.400362761 | 0.007744 |
| FARSB      | 0.038109376  | 0.7350625 | 0.204955824  | 0.0663272 | 0.297095537  | 0.00778  |
| GBF1       | 0.020731174  | 0.8451545 | -0.130254916 | 0.2194596 | -0.282922187 | 0.007813 |
| ARRDC4     | 0.079919701  | 0.7269293 | -0.324092392 | 0.1568033 | -0.608841092 | 0.007845 |
| CD63       | 0.174568367  | 0.0890106 | -0.020719852 | 0.8400234 | 0.272684341  | 0.00786  |
| SLC6A11    | -0.151295939 | 0.8024523 | 0.651267761  | 0.2754813 | -1.705609746 | 0.007897 |
| SH3GLB2    | 0.039043437  | 0.7501692 | -0.071129051 | 0.561795  | 0.324326969  | 0.007913 |
| TRMT12     | 0.100571913  | 0.517952  | -0.205580556 | 0.1836833 | -0.415157767 | 0.007927 |
| AC007040.1 | 0.40045992   | 0.4846432 | 0.905933568  | 0.1116759 | 1.499488897  | 0.008015 |
| PHF23      | -0.170759584 | 0.1880503 | -0.251211598 | 0.052296  | -0.343658247 | 0.008017 |
| SLC25A13   | 0.119579101  | 0.3447755 | 0.153779546  | 0.2227975 | 0.334002597  | 0.00801  |
| LARGE      | 0.113157421  | 0.3649358 | -0.11078461  | 0.376216  | 0.329355331  | 0.008055 |
| ZC3H10     | -0.299006621 | 0.0789792 | -0.185263447 | 0.2690471 | -0.449881735 | 0.008076 |
| SESN3      | -0.281429989 | 0.2413719 | 0.376334535  | 0.1168395 | -0.636259949 | 0.008106 |
| AATK       | -0.248276275 | 0.4826629 | -0.45234029  | 0.2017603 | -0.94368093  | 0.008178 |
| SBDS       | -0.060414398 | 0.5367056 | 0.157888171  | 0.1032018 | 0.256279698  | 0.008182 |
| WDR48      | 0.077304173  | 0.4808184 | 0.194880383  | 0.0740667 | 0.288817727  | 0.008164 |
| BCAR3      | 0.272312794  | 0.2002146 | 0.33580682   | 0.1138182 | 0.558481002  | 0.008186 |
| FREM1      | -0.177832555 | 0.5932632 | 0.164252429  | 0.6215755 | -0.88092607  | 0.008218 |
| ZNF569     | -0.309550637 | 0.1914506 | -0.092564091 | 0.6929561 | -0.624849898 | 0.008287 |
| ANKRD13C   | -0.190953121 | 0.0917137 | -0.105485236 | 0.3498337 | -0.299091024 | 0.008301 |

|           |              |           |              |           |              |          |
|-----------|--------------|-----------|--------------|-----------|--------------|----------|
| ARHGEF35  | -0.075959189 | 0.5113256 | -0.162914188 | 0.1566469 | 0.300090182  | 0.008317 |
| LUZP1     | 0.070254742  | 0.6060636 | -0.200960848 | 0.1408009 | -0.360116604 | 0.008392 |
| GRM8      | 0.530883333  | 0.5011054 | 0.411072075  | 0.5947073 | 1.968518577  | 0.008404 |
| NAPEPLD   | -0.495301275 | 0.0603758 | -0.45016036  | 0.087175  | -0.697984822 | 0.008455 |
| ADCY1     | 0.389809883  | 0.3592703 | 0.229570943  | 0.588728  | 1.108938106  | 0.008465 |
| ASXL3     | -0.274718692 | 0.350814  | 0.159050404  | 0.5844672 | -0.775537009 | 0.008476 |
| AGBL5     | 0.089743746  | 0.3824583 | -0.089864985 | 0.380245  | -0.271937079 | 0.0085   |
| PRRX1     | 2.095426482  | 0.0501151 | 1.495668219  | 0.1624327 | 2.812117112  | 0.008512 |
| VIT       | -0.947182949 | 0.4299731 | 0.795338474  | 0.4746276 | 2.831499516  | 0.00852  |
| ZNF615    | -0.227273465 | 0.280135  | -0.107447453 | 0.6058563 | -0.553470415 | 0.008542 |
| HLA-DRB1  | -0.249308038 | 0.640661  | -0.112914387 | 0.8324979 | -1.405884413 | 0.00861  |
| GIN1      | -0.451977614 | 0.0558725 | -0.244105094 | 0.2845974 | -0.609022162 | 0.008685 |
| GOLGA8J   | -0.062483654 | 0.9128717 | 0.466110346  | 0.3909295 | -1.822016212 | 0.008693 |
| LRRC3     | 0.072465006  | 0.6276996 | -0.186923676 | 0.2116778 | -0.402471157 | 0.008694 |
| PCED1B    | 0.281628914  | 0.4149034 | 0.090761642  | 0.7940086 | 0.872698609  | 0.008791 |
| TSSK5P1   | -0.740032285 | 0.1363937 | -0.821267577 | 0.0917778 | -1.410677647 | 0.008789 |
| NAALADL2  | 0.209765235  | 0.3717978 | 0.392046627  | 0.0948902 | 0.613859703  | 0.008853 |
| SLC36A1   | -0.132273237 | 0.7401262 | 0.206876928  | 0.603554  | -1.052460942 | 0.008856 |
| TMEM9B    | 0.013221158  | 0.897339  | -0.039861903 | 0.6951705 | 0.264236303  | 0.00887  |
| KIAA0226L | 0.333349791  | 0.6782463 | -0.017886648 | 0.9821801 | -2.362740429 | 0.008897 |
| ZNF16     | -0.14730004  | 0.2445523 | -0.142718063 | 0.2530071 | -0.331894259 | 0.008914 |
| AHCYL1    | 0.108873178  | 0.3472133 | 0.183804177  | 0.112168  | 0.3024593    | 0.008925 |
| MORN4     | -0.319065982 | 0.1329629 | -0.412755414 | 0.0503658 | -0.565916184 | 0.008959 |
| SPOPL     | 0.236720746  | 0.0890016 | 0.048092399  | 0.7295763 | 0.36240854   | 0.009031 |
| DIAPH2    | 0.016015697  | 0.9081589 | 0.068550261  | 0.6209896 | 0.361360803  | 0.009087 |
| TMEM246   | 0.119201515  | 0.348827  | -0.016195242 | 0.8984775 | 0.329523083  | 0.009084 |
| IKBIP     | -0.269726183 | 0.070044  | -0.17008319  | 0.2499554 | -0.387674778 | 0.009094 |
| AK8       | 0.656100907  | 0.1613246 | 0.381010036  | 0.4214581 | 1.201452221  | 0.009251 |
| C11orf70  | -0.791603012 | 0.0963117 | 0.042168801  | 0.9266838 | -1.281588341 | 0.009247 |
| MPP5      | -0.074270586 | 0.3496098 | -0.146501879 | 0.0628585 | -0.205424933 | 0.009296 |
| IDNK      | 0.034785251  | 0.8679818 | 0.027030679  | 0.894298  | 0.51383031   | 0.009318 |
| SOX4      | -0.167876744 | 0.250275  | 0.093059613  | 0.5230885 | -0.379784251 | 0.009321 |
| PLEKHA8P1 | -0.512198838 | 0.0683663 | -0.476483462 | 0.0852548 | -0.736624739 | 0.00933  |
| AIFM1     | 0.067717858  | 0.6189494 | 0.129281432  | 0.339185  | 0.351208877  | 0.009355 |
| CYBA      | 0.229844317  | 0.1260229 | 0.074406729  | 0.6206514 | 0.389784371  | 0.009356 |
| IRVMER34- | -0.029816264 | 0.9210731 | 0.313589663  | 0.2855844 | 0.765383287  | 0.009367 |
| SUSD4     | 0.395921393  | 0.2173062 | -0.329907781 | 0.3131503 | 0.823410095  | 0.009414 |
| CHMP7     | 0.061507686  | 0.565404  | -0.012759401 | 0.9045888 | 0.275661063  | 0.009423 |
| GGT1      | -0.065360989 | 0.8840013 | 0.503088138  | 0.2569156 | -1.188696328 | 0.009423 |
| ZNF223    | -0.323177    | 0.0785781 | -0.249664746 | 0.1666398 | -0.480041696 | 0.009519 |
| COX5B     | 0.143083367  | 0.1964564 | 0.022595938  | 0.8380102 | 0.285454544  | 0.009555 |
| RAI14     | 0.203386765  | 0.3138546 | 0.117881244  | 0.5593425 | 0.522521998  | 0.009579 |
| TNFRSF10C | -0.158516752 | 0.6081625 | -0.2812778   | 0.362816  | -0.804997806 | 0.009605 |
| PDPK2     | -0.260809889 | 0.3156997 | -0.18976023  | 0.4588344 | -0.683006952 | 0.009703 |
| SYNM      | 0.337470862  | 0.1703282 | 0.344473793  | 0.1604924 | -0.645122826 | 0.009716 |
| RCOR2     | -0.397469511 | 0.1168136 | -0.391320373 | 0.118224  | -0.656014464 | 0.009728 |
| KDM7A     | -0.03464568  | 0.8619028 | 0.091711348  | 0.6448454 | 0.512542762  | 0.009756 |

|            |              |           |              |           |              |          |
|------------|--------------|-----------|--------------|-----------|--------------|----------|
| AC096921.2 | -0.588429016 | 0.3002867 | -0.897399768 | 0.1158391 | -1.569026284 | 0.009799 |
| BNIP3      | -0.129113609 | 0.4358703 | -0.309314738 | 0.0618432 | -0.428358039 | 0.009805 |
| DSTYK      | -0.135757219 | 0.270458  | -0.178656131 | 0.143741  | -0.318551658 | 0.009837 |
| HOXB3      | -0.338580336 | 0.275005  | 0.124912103  | 0.6853972 | -0.802375509 | 0.009873 |
| ARL6       | -0.415770611 | 0.0529134 | -0.169675617 | 0.4145885 | -0.547847701 | 0.009891 |
| PCGF6      | -0.354496493 | 0.0550059 | -0.055670913 | 0.7577757 | -0.470746785 | 0.009888 |
| SDPR       | 0.032342813  | 0.9321873 | 0.222254066  | 0.5581112 | -0.984924962 | 0.009922 |
| SLC6A4     | -0.522797762 | 0.2312196 | -0.285790403 | 0.4969947 | -1.124090222 | 0.009959 |
| GSG2       | -0.250960435 | 0.2179987 | -0.220891201 | 0.2737699 | -0.527494031 | 0.010007 |
| CUEDC2     | 0.040511936  | 0.7620401 | -0.100812222 | 0.4500548 | -0.347947262 | 0.010024 |
| '11-1136G1 | 0.244846394  | 0.4132174 | -0.140878178 | 0.6428986 | 0.730090734  | 0.010152 |
| TBL1XR1    | 0.095648108  | 0.3274408 | 0.163712171  | 0.0928447 | 0.250298759  | 0.010196 |
| PRG4       | -0.397288739 | 0.5840803 | 0.697477991  | 0.2801947 | 1.643426534  | 0.010212 |
| ISX        | -0.511120628 | 0.3131504 | -0.567028754 | 0.2629162 | -1.304331287 | 0.010256 |
| UCK1       | 0.056123907  | 0.6978629 | -0.114252076 | 0.4278067 | -0.373772272 | 0.010356 |
| FAN1       | -0.011214503 | 0.9706705 | 0.175599282  | 0.5629629 | -0.812765205 | 0.010407 |
| DCDC2      | -0.392391591 | 0.3536163 | 0.433380433  | 0.3017733 | -1.092496052 | 0.010433 |
| XPNPEP1    | 0.15952727   | 0.136756  | 0.104950612  | 0.3265437 | 0.273627317  | 0.010457 |
| EDEM3      | 0.095615248  | 0.5131386 | -0.120099656 | 0.4113112 | 0.373808134  | 0.010489 |
| ΓMPRSS11/  | -0.569628269 | 0.6578089 | -1.518182956 | 0.2907329 | 2.847492257  | 0.010518 |
| CCT5       | 0.09594831   | 0.393803  | 0.157009894  | 0.1621785 | 0.287260741  | 0.010533 |
| TMEM198    | -0.116035014 | 0.6217828 | -0.092589536 | 0.6855709 | -0.622924603 | 0.010546 |
| KAT6B      | -0.017582437 | 0.8620134 | -0.178907866 | 0.0762085 | -0.259478209 | 0.010566 |
| USP15      | 0.034202525  | 0.804708  | 0.151582501  | 0.2721121 | 0.352698406  | 0.010574 |
| UMPS       | 0.113171958  | 0.4838933 | -0.000383218 | 0.9981062 | 0.412614052  | 0.010584 |
| PKM        | 0.02421059   | 0.8058526 | 0.046421989  | 0.637381  | 0.251691147  | 0.01059  |
| CYP24A1    | -1.451898976 | 0.387183  | 1.361654668  | 0.3242644 | 3.444454346  | 0.010601 |
| PSMD10     | -0.078179137 | 0.6106236 | 0.245011185  | 0.1078715 | 0.389252666  | 0.010604 |
| UBFD1      | -0.075818116 | 0.4512284 | -0.110413473 | 0.2704023 | -0.257112038 | 0.010645 |
| TRIM39     | 0.135747741  | 0.1863132 | -0.158914401 | 0.1223536 | 0.259586985  | 0.010709 |
| PHOSPHO2   | -0.568823036 | 0.3320802 | -0.341048421 | 0.5583085 | -1.576000863 | 0.010761 |
| MYL12B     | -0.167734562 | 0.0766894 | 0.02528369   | 0.789144  | 0.240958257  | 0.010782 |
| PXDN       | -0.021739007 | 0.8905453 | 0.074536368  | 0.6368215 | -0.403203093 | 0.010779 |
| TBC1D5     | -0.105189861 | 0.2954836 | -0.118025185 | 0.2386768 | -0.256746755 | 0.010808 |
| RAB2A      | -0.13651244  | 0.0972787 | -0.05969518  | 0.4656808 | 0.208057129  | 0.010891 |
| PROSER2    | 0.306016259  | 0.202582  | 0.175478516  | 0.4627826 | 0.604798476  | 0.01091  |
| UCK2       | 0.011464356  | 0.9367933 | 0.161960886  | 0.2600973 | 0.365672686  | 0.010918 |
| XPC        | -0.185485853 | 0.2344654 | -0.250264975 | 0.1070817 | -0.396917681 | 0.010948 |
| FADS1      | 0.194253013  | 0.1833843 | 0.023513933  | 0.8720271 | 0.370994871  | 0.010999 |
| TVP23B     | 0.271101345  | 0.054535  | 0.194693692  | 0.166392  | 0.35769118   | 0.010988 |
| GMFB       | 0.122211801  | 0.1460423 | 0.113480545  | 0.1755134 | 0.213008138  | 0.011029 |
| NDUFV2P1   | 0.34444568   | 0.3083125 | 0.372414999  | 0.2636991 | 0.832616075  | 0.011065 |
| MRPL14     | 0.165719705  | 0.0812634 | -0.083433016 | 0.3802974 | 0.239434382  | 0.011094 |
| NHS        | 0.37183228   | 0.238796  | -0.057773033 | 0.8548033 | 0.799760526  | 0.011115 |
| NPIPA1     | -0.023039178 | 0.8743783 | 0.032981128  | 0.8207464 | -0.371128508 | 0.011131 |
| SP4        | -0.231021775 | 0.1009308 | -0.241896705 | 0.0843846 | -0.357173638 | 0.011142 |
| BMP3       | 0.450778418  | 0.1417091 | -0.327555526 | 0.2865475 | 0.777620939  | 0.011152 |

|            |              |           |              |           |              |          |
|------------|--------------|-----------|--------------|-----------|--------------|----------|
| IFNLR1     | 0.312392492  | 0.0876306 | 0.263222813  | 0.1492419 | 0.460579865  | 0.011175 |
| MOCS1      | 0.077404677  | 0.7301517 | -0.117141669 | 0.5987235 | -0.581669148 | 0.011173 |
| TRIM25     | 0.133558399  | 0.336752  | 0.093115506  | 0.5030382 | 0.351986416  | 0.011174 |
| SART3      | -0.010902392 | 0.8808368 | -0.119835955 | 0.0973941 | -0.18427877  | 0.011279 |
| WDR75      | -0.040111453 | 0.6459154 | 0.098601482  | 0.254426  | 0.218851664  | 0.011132 |
| SLC13A4    | -0.910656351 | 0.1008493 | -0.634872256 | 0.2423999 | -1.403015208 | 0.011138 |
| SCP2       | -0.101743298 | 0.3337056 | -0.144307567 | 0.1693444 | 0.264413606  | 0.011588 |
| NAALADL1   | -0.511961991 | 0.4319278 | 0.001682171  | 0.9978843 | -2.187958707 | 0.011611 |
| NMB        | 0.376112676  | 0.1121248 | -0.049042646 | 0.8371754 | 0.589819652  | 0.011608 |
| SLC51B     | -0.589869574 | 0.3495264 | 0.268634789  | 0.6639719 | -1.639940567 | 0.011644 |
| FAM9C      | 0.192200593  | 0.5697983 | -0.474382711 | 0.1676131 | -0.880118818 | 0.011738 |
| OLFM3      | 1.74327739   | 0.2040422 | 1.853238795  | 0.1745078 | 3.423984797  | 0.011734 |
| CLDN11     | 0.650215757  | 0.3191116 | 0.282606639  | 0.665132  | 1.63895865   | 0.011779 |
| EFNB3      | 0.140159905  | 0.6433892 | -0.040993542 | 0.8921841 | -0.775488209 | 0.011816 |
| ARL6IP1    | 0.080069636  | 0.4756003 | 0.094707919  | 0.3982181 | 0.282082311  | 0.011843 |
| RAB38      | -0.377696618 | 0.1792949 | 0.172894126  | 0.5318937 | -0.71119027  | 0.011845 |
| RP1-95L4.4 | -0.491339914 | 0.2725247 | 0.005739093  | 0.9891766 | -1.198176221 | 0.011843 |
| BLZF1      | 0.027973256  | 0.7327849 | 0.004455779  | 0.956124  | 0.202889636  | 0.011861 |
| IFIT3      | 0.42290265   | 0.1327956 | 0.463294823  | 0.0969561 | 0.699781867  | 0.011886 |
| KRAS       | -0.12270903  | 0.1525046 | -0.108551454 | 0.203331  | 0.213912805  | 0.011939 |
| LRRFIP1    | -0.015317389 | 0.8795302 | 0.011888972  | 0.9060978 | 0.252888242  | 0.011949 |
| EPS15      | -0.033954426 | 0.7500233 | 0.082702742  | 0.4362829 | 0.266090341  | 0.01205  |
| RAD9A      | -0.150239052 | 0.4001591 | -0.180608471 | 0.307222  | -0.451032181 | 0.01208  |
| PSMG4      | 0.24957754   | 0.1381266 | 0.130299077  | 0.4366652 | 0.419003975  | 0.012106 |
| BCL9       | -0.494532342 | 0.3585576 | -0.687391059 | 0.2005412 | -1.362437337 | 0.012137 |
| CYP2C19    | 0.175916804  | 0.467928  | 0.46252405   | 0.055397  | 0.604968341  | 0.012155 |
| NDEL1      | 0.001143439  | 0.990815  | -0.042894611 | 0.6660584 | 0.247957802  | 0.012204 |
| MGP        | 0.795645114  | 0.2656684 | 0.819681977  | 0.2514107 | 1.788083255  | 0.012266 |
| PSME1      | -0.00865107  | 0.9237953 | -0.063500914 | 0.4801906 | 0.224201277  | 0.012268 |
| SEMA4A     | -0.044992015 | 0.8823616 | 0.032977318  | 0.9131781 | 0.741806893  | 0.012263 |
| RTCB       | 0.010232868  | 0.9050564 | 0.043511277  | 0.6095351 | 0.2130543    | 0.012289 |
| ADH1C      | -0.266554265 | 0.6100599 | 0.035127973  | 0.9461351 | 1.293941009  | 0.012356 |
| HN1        | 0.032997967  | 0.7545937 | 0.10400347   | 0.3228084 | 0.262874799  | 0.012353 |
| GUCD1      | 0.171645849  | 0.1402638 | 0.178079137  | 0.1249362 | 0.290088069  | 0.012457 |
| FHOD1      | -0.198207919 | 0.2467024 | -0.225358291 | 0.1850765 | -0.425971586 | 0.012606 |
| 3-Mar      | 0.123638409  | 0.5870026 | 0.374123457  | 0.0955539 | 0.558151215  | 0.012672 |
| S100A11    | 0.240830421  | 0.1383486 | -0.008283689 | 0.9593473 | 0.404834732  | 0.012678 |
| NFRKB      | -0.007721209 | 0.9359279 | -0.155319642 | 0.1046418 | -0.23968217  | 0.012706 |
| FAM91A1    | 0.095447391  | 0.3098832 | -0.021369476 | 0.8197359 | 0.233274901  | 0.012746 |
| RABGGTB    | -0.043819811 | 0.6139366 | 0.039411603  | 0.6485271 | 0.215203167  | 0.012745 |
| SIX1       | 1.011294752  | 0.3441492 | 1.838141419  | 0.0848459 | 2.652658112  | 0.01277  |
| G3BP1      | 0.154065631  | 0.0998955 | 0.142275223  | 0.1283845 | 0.232938103  | 0.012788 |
| BCAS1      | 0.002489943  | 0.9915614 | -0.276292056 | 0.2406644 | 0.585159385  | 0.012828 |
| PPARA      | -0.054789053 | 0.7536869 | -0.21525081  | 0.2175246 | -0.435519631 | 0.012846 |
| MAP2K1     | 0.24211092   | 0.1005551 | -0.040241931 | 0.7853253 | 0.365404147  | 0.012893 |
| NKPD1      | -0.527753197 | 0.222523  | -0.487987351 | 0.2483113 | -1.136903711 | 0.012949 |
| DENND1A    | -0.205781869 | 0.1789275 | -0.235162635 | 0.1225816 | -0.381860079 | 0.012974 |

|            |              |           |              |           |              |          |
|------------|--------------|-----------|--------------|-----------|--------------|----------|
| NMI        | 0.137612494  | 0.547471  | 0.077033881  | 0.7341248 | 0.552892146  | 0.013    |
| PLP2       | 0.10740765   | 0.5169321 | -0.121005992 | 0.4652741 | 0.410231223  | 0.013061 |
| CORO7      | 0.263771412  | 0.107671  | 0.238316158  | 0.1432703 | 0.402744557  | 0.013076 |
| EZR        | 0.20580599   | 0.1051988 | -0.120028646 | 0.344773  | 0.315046503  | 0.013099 |
| RABL2A     | -0.121214803 | 0.5265088 | -0.292084014 | 0.1236856 | -0.476069193 | 0.013107 |
| IGSF9      | -0.259817202 | 0.3088573 | -0.443303516 | 0.082348  | -0.63560966  | 0.013137 |
| CFL1       | 0.129070436  | 0.1407729 | 0.120053542  | 0.170368  | 0.21705741   | 0.013179 |
| CCDC14     | -0.176332595 | 0.1440672 | -0.029757948 | 0.8047068 | -0.299262503 | 0.01322  |
| BNC1       | 0.092198529  | 0.8787427 | 0.542359605  | 0.3664067 | -1.532576234 | 0.013256 |
| GREM2      | 0.117474244  | 0.6177072 | 0.420756462  | 0.0722164 | -0.587309838 | 0.01335  |
| CLOCK      | 0.028878763  | 0.7810459 | 0.134690696  | 0.1932941 | 0.255605856  | 0.013377 |
| UBE2O      | -0.212103992 | 0.2377389 | -0.336580687 | 0.0599122 | -0.444031587 | 0.013407 |
| AGPAT4     | -0.350652202 | 0.15057   | -0.049141173 | 0.8398512 | -0.605628676 | 0.013413 |
| HERC6      | -0.149563621 | 0.5368005 | 0.190217271  | 0.4173636 | 0.5759107    | 0.013507 |
| ZMYND10    | 0.534955268  | 0.3340057 | 0.275848253  | 0.6128993 | 1.305325243  | 0.013524 |
| CLASP1     | -0.011853623 | 0.9191193 | -0.194589622 | 0.0950167 | -0.289105038 | 0.013535 |
| NADK       | 0.142577378  | 0.1650851 | -0.189339253 | 0.0648755 | 0.252110805  | 0.013563 |
| BPIFB1     | 0.311552153  | 0.6329332 | -0.009839774 | 0.9879664 | 1.607101766  | 0.013608 |
| S100A2     | -1.375163997 | 0.1271758 | -0.283511024 | 0.7492974 | 2.153400964  | 0.013671 |
| KRBOX4     | -0.195465966 | 0.2142296 | -0.304108028 | 0.0528687 | -0.389823955 | 0.013891 |
| RPIA       | 0.042041619  | 0.7411252 | -0.054660436 | 0.6648988 | 0.306105599  | 0.013891 |
| RRM2B      | -0.350554388 | 0.1148078 | -0.191351091 | 0.3881413 | -0.546454638 | 0.013921 |
| ZNF561     | -0.155477216 | 0.1742474 | -0.102393342 | 0.3664863 | -0.281176077 | 0.01393  |
| TOP3A      | 0.015395767  | 0.90836   | -0.091944985 | 0.490156  | -0.33036493  | 0.013943 |
| LCT        | -0.090711012 | 0.9109639 | -0.283227653 | 0.7268067 | -2.069288901 | 0.013984 |
| CUL4A      | 0.160289841  | 0.0639333 | 0.058410757  | 0.496192  | 0.210766503  | 0.013997 |
| SLC17A4    | -0.412724912 | 0.5670231 | 0.107430408  | 0.8814165 | -1.778476164 | 0.014009 |
| MMP19      | -0.019514844 | 0.9493635 | -0.263423837 | 0.3919553 | -0.767736478 | 0.014076 |
| CDK11A     | 0.189070109  | 0.252182  | -0.14162851  | 0.3924508 | -0.407518221 | 0.014127 |
| MTDH       | -0.197527748 | 0.1323801 | 0.235375689  | 0.0722961 | 0.321442162  | 0.01413  |
| USH2A      | -0.664699107 | 0.0618728 | -0.266705757 | 0.4304109 | -0.880290864 | 0.014115 |
| ATP6V1E1   | 0.084141945  | 0.3845217 | 0.128639318  | 0.1798614 | 0.23514839   | 0.014161 |
| NAA15      | 0.175067995  | 0.0910175 | 0.125784117  | 0.2236871 | 0.253449633  | 0.014189 |
| PRR5L      | 0.065291431  | 0.9110108 | 0.731180148  | 0.1973094 | 1.381717553  | 0.014184 |
| FAM214A    | -0.196528212 | 0.158593  | -0.087022101 | 0.5277838 | -0.341016984 | 0.014212 |
| MFN1       | 0.135237958  | 0.1745879 | 0.043525813  | 0.6610174 | 0.242745847  | 0.014296 |
| BET1       | -0.107071262 | 0.4476194 | -0.133203154 | 0.3410132 | -0.345187888 | 0.014322 |
| MED31      | -0.114168947 | 0.4702811 | -0.174911756 | 0.2657484 | -0.397234578 | 0.014526 |
| AC016773.1 | -0.686705542 | 0.0918683 | -0.056908963 | 0.8811436 | -1.014418155 | 0.014604 |
| ADAMTS20   | -0.039089988 | 0.9090024 | -0.457401257 | 0.1856284 | -0.865922422 | 0.014614 |
| NRG4       | -0.023707719 | 0.9316407 | 0.000324838  | 0.9990605 | 0.664816851  | 0.014652 |
| CA9        | 0.219287163  | 0.5560367 | -0.128104615 | 0.7309583 | -0.910705875 | 0.014685 |
| ZNF773     | -0.218399596 | 0.2050866 | -0.043893995 | 0.7958259 | -0.420842901 | 0.014702 |
| TMEM63C    | 0.110130162  | 0.9077339 | 0.554424464  | 0.5615657 | -2.684542264 | 0.014709 |
| HOXB5      | -0.127658094 | 0.7721252 | 0.121507456  | 0.7767862 | -1.159628448 | 0.014748 |
| IGF1       | 0.432641109  | 0.366188  | 0.362651831  | 0.4484994 | 1.165023988  | 0.014794 |
| ING4       | 0.032781141  | 0.8487407 | -0.130829591 | 0.4440534 | -0.421417548 | 0.014798 |

|            |              |           |              |           |              |          |
|------------|--------------|-----------|--------------|-----------|--------------|----------|
| SNX4       | -0.178716761 | 0.0728063 | -0.060961706 | 0.5375991 | 0.239973291  | 0.014806 |
| SH3BGR     | -0.651640688 | 0.2715623 | -0.294411486 | 0.6085585 | -1.523520508 | 0.014836 |
| SYK        | 0.026973772  | 0.836179  | -0.225301305 | 0.0839956 | 0.315775932  | 0.014843 |
| COL4A4     | 0.509131861  | 0.3624008 | 0.17772034   | 0.7511942 | 1.333441657  | 0.014888 |
| P11-173M11 | 1.266491614  | 0.1122128 | 0.79368217   | 0.3272963 | 1.869064947  | 0.014886 |
| RAD23B     | 0.090965375  | 0.4917259 | 0.189678625  | 0.1513658 | 0.321811976  | 0.014924 |
| ABCB11     | -0.471694018 | 0.5724184 | 0.420524151  | 0.5989769 | -2.172922179 | 0.015022 |
| FBXO17     | 0.02154465   | 0.8776609 | 0.063936829  | 0.6438282 | -0.343784237 | 0.015029 |
| NEK7       | 0.11335367   | 0.3474495 | 0.17536548   | 0.1445878 | 0.292210073  | 0.01503  |
| BAIAP3     | 0.549679457  | 0.0880402 | -0.112454158 | 0.7331966 | -0.805273966 | 0.015063 |
| LINC00674  | -0.457803948 | 0.1574357 | -0.01262975  | 0.968613  | -0.792364174 | 0.015082 |
| ACVR2B     | -0.053185157 | 0.6788343 | -0.026886419 | 0.8335766 | -0.312432005 | 0.015168 |
| ATP6V0A1   | 0.08432081   | 0.5322025 | -0.066708816 | 0.6217681 | -0.330550507 | 0.015187 |
| TMEM33     | 0.126617873  | 0.2252674 | 0.196931311  | 0.0584114 | 0.252781426  | 0.015185 |
| TXLNG      | 0.214556536  | 0.099693  | 0.233773582  | 0.0722401 | 0.315745526  | 0.015195 |
| HAT1       | -0.052110834 | 0.6392929 | 0.113548444  | 0.3030085 | 0.267274143  | 0.01523  |
| MAPRE2     | 0.187143283  | 0.2820253 | -0.102543493 | 0.5560817 | 0.421805664  | 0.015223 |
| PITRM1     | 0.100481328  | 0.2861014 | 0.05749289   | 0.5397876 | 0.22735499   | 0.015239 |
| CLIC6      | 0.378636085  | 0.2748049 | 0.174074045  | 0.6155747 | 0.839910216  | 0.015251 |
| SYT4       | -0.537817475 | 0.5030593 | -0.572500173 | 0.4785996 | -2.098670823 | 0.015278 |
| TMEM30B    | 0.073588857  | 0.6499287 | -0.210268264 | 0.1949357 | 0.391127047  | 0.015339 |
| BST2       | 0.101600803  | 0.7449572 | -0.432647936 | 0.1678207 | -0.763465982 | 0.015356 |
| STOM       | -0.01840512  | 0.921354  | 0.23811351   | 0.2008178 | -0.452818836 | 0.015361 |
| COL10A1    | 0.153733375  | 0.7537188 | 0.133686903  | 0.7785135 | 1.151731025  | 0.015421 |
| MAPRE3     | 0.057750271  | 0.7991068 | -0.223198517 | 0.3269971 | -0.564365246 | 0.015418 |
| TMEM145    | -0.946904267 | 0.0722215 | 0.502397266  | 0.3373289 | -1.315129928 | 0.015419 |
| TAGAP      | 0.935667424  | 0.0724087 | 0.413010699  | 0.440286  | 1.253371563  | 0.015456 |
| NBL1       | 0.236740653  | 0.1884788 | 0.259659339  | 0.148392  | 0.434071127  | 0.015494 |
| WASH2P     | -0.172837044 | 0.2865601 | -0.197852602 | 0.2212989 | -0.39344321  | 0.015613 |
| C18orf8    | 0.083807799  | 0.5565199 | 0.023929546  | 0.8656579 | 0.339682321  | 0.015679 |
| ZNF134     | 0.06374066   | 0.6278313 | -0.07449813  | 0.5697955 | -0.319161511 | 0.015702 |
| NUP153     | 0.202250968  | 0.0695922 | 0.182548424  | 0.1010486 | 0.268872281  | 0.015728 |
| NEUROD1    | -0.12374654  | 0.8555664 | 0.06637818   | 0.9199317 | -2.032246284 | 0.015735 |
| FDXACB1    | -0.379649187 | 0.0967621 | -0.185836095 | 0.4054577 | -0.556368653 | 0.015777 |
| PANK3      | 0.070876617  | 0.461428  | 0.038463958  | 0.6890981 | 0.232015858  | 0.015787 |
| PSME2      | 0.184029753  | 0.0699653 | 0.054852609  | 0.5881085 | 0.243883014  | 0.015847 |
| HLA-DRB5   | -0.182340499 | 0.7911874 | 0.052570391  | 0.9390745 | -1.672838251 | 0.015859 |
| ACMSD      | -0.679416875 | 0.2270328 | 0.154889345  | 0.7766283 | -1.424537834 | 0.015875 |
| UQCRFS1    | 0.005939527  | 0.9513365 | 0.051219363  | 0.5968201 | 0.233197556  | 0.01588  |
| PDE4C      | 0.162235376  | 0.4249196 | -0.251020239 | 0.2196206 | 0.488808323  | 0.015892 |
| FAM193B    | -0.233706961 | 0.1288875 | -0.293108873 | 0.0563668 | -0.372606328 | 0.015926 |
| EBP        | -0.11608019  | 0.3811919 | -0.031798121 | 0.8099804 | 0.318104033  | 0.01597  |
| PTCD1      | -0.092238759 | 0.5971476 | -0.167743718 | 0.3325315 | -0.420720109 | 0.016011 |
| ECHDC3     | 0.235307882  | 0.7481122 | 0.219566113  | 0.7594969 | -2.072525432 | 0.016024 |
| GLTPD2     | 0.228704082  | 0.5958822 | -0.00329976  | 0.9938937 | -1.087744747 | 0.016035 |
| SGIP1      | -0.329812332 | 0.16889   | 0.208061424  | 0.3761316 | -0.581594107 | 0.016053 |
| HEPACAM    | -0.192088961 | 0.6532856 | -0.105821964 | 0.8021259 | -1.070722366 | 0.016088 |



|            |              |           |              |           |              |          |
|------------|--------------|-----------|--------------|-----------|--------------|----------|
| IGFN1      | 1.050453931  | 0.3640441 | 0.236252284  | 0.8391269 | 2.754251037  | 0.016165 |
| RALA       | -0.128200287 | 0.2675779 | -0.058043471 | 0.613791  | 0.275613671  | 0.016316 |
| DISC1      | -0.178476226 | 0.4961074 | 0.009720358  | 0.9702102 | -0.634608164 | 0.016341 |
| WFDC3      | 0.429786326  | 0.383121  | 0.035785015  | 0.9422776 | 1.130251075  | 0.016368 |
| GRB10      | 0.367854161  | 0.1033421 | 0.29965281   | 0.1841191 | 0.540842041  | 0.016395 |
| ASL        | 0.026640415  | 0.8692323 | -0.001451774 | 0.9928268 | 0.386900787  | 0.016437 |
| PRSS36     | -1.069685775 | 0.0573815 | -0.36308299  | 0.4964665 | -1.347495595 | 0.016497 |
| AFG3L2     | -0.079059609 | 0.446468  | 0.034361523  | 0.7392652 | 0.246973996  | 0.016602 |
| MYH14      | 0.265494237  | 0.3735924 | 0.444386368  | 0.1361021 | 0.71389273   | 0.016625 |
| PIP5KL1    | 0.243533937  | 0.410466  | -0.161365302 | 0.5882344 | -0.752806047 | 0.016643 |
| TGFB2      | 0.802658423  | 0.3031055 | 1.091994241  | 0.1607999 | 1.86255511   | 0.016639 |
| RANGAP1    | 0.244724887  | 0.1010659 | 0.056762102  | 0.7033674 | 0.356075402  | 0.016733 |
| LRRFIP1P1  | -0.164113376 | 0.2910266 | 0.102092036  | 0.4943881 | 0.353801962  | 0.016748 |
| EXOSC10    | 0.116703586  | 0.0919937 | 0.079105686  | 0.2504453 | 0.164571793  | 0.01679  |
| IL1RAP     | 0.249516873  | 0.215959  | 0.158230643  | 0.4322987 | 0.480969101  | 0.016863 |
| CETN3      | -0.236269288 | 0.1735525 | -0.220438856 | 0.198623  | -0.414267215 | 0.017086 |
| GPC6       | 0.040965554  | 0.7974307 | 0.10545826   | 0.508327  | -0.381008972 | 0.017103 |
| MAGEL2     | 0.140930466  | 0.6547833 | -0.414756042 | 0.1942702 | -0.781272233 | 0.017117 |
| FAM198B    | -0.209643234 | 0.3742092 | -0.17862775  | 0.4481386 | -0.562398061 | 0.017157 |
| SAP18      | 0.028871163  | 0.7311641 | 0.024359003  | 0.7708778 | 0.19887256   | 0.017336 |
| CCDC88A    | -0.206458773 | 0.218245  | 0.288543618  | 0.0840088 | -0.399394119 | 0.017358 |
| SLCO2A1    | 0.462366511  | 0.1237561 | 0.014757635  | 0.9608731 | 0.712879315  | 0.017461 |
| FHAD1      | 0.348079821  | 0.3511403 | 0.530607626  | 0.1475815 | 0.862184138  | 0.017514 |
| KEAP1      | -0.088234241 | 0.5901157 | -0.125598172 | 0.4421263 | -0.388610727 | 0.017522 |
| FDFT1      | 0.27784713   | 0.0590452 | 0.107457117  | 0.4652306 | 0.349353351  | 0.017561 |
| OSTCP1     | -0.571158734 | 0.110216  | -0.336056325 | 0.3233633 | -0.865737724 | 0.017564 |
| AXL        | 0.052510783  | 0.7978991 | -0.147643184 | 0.4714352 | -0.489172695 | 0.01761  |
| DLST       | 0.118166174  | 0.167357  | 0.112429965  | 0.1869789 | 0.202145518  | 0.0176   |
| ARPC1B     | 0.031103396  | 0.8174754 | 0.226154867  | 0.0918241 | 0.318344115  | 0.017645 |
| TMEM178A   | -0.436958049 | 0.15988   | -0.304652509 | 0.3091865 | -0.735053697 | 0.01765  |
| ZSCAN21    | -0.041428011 | 0.8204648 | -0.310652215 | 0.0885418 | -0.437815359 | 0.017684 |
| THAP9      | -0.266930346 | 0.2268937 | -0.15638689  | 0.4741744 | -0.522159278 | 0.017742 |
| AC093642.5 | 0.087268262  | 0.8045559 | 0.252136266  | 0.4682658 | 0.811813526  | 0.017787 |
| MYL12A     | -0.137989027 | 0.1029783 | 0.012865406  | 0.8787657 | 0.199740835  | 0.0178   |
| GRHL1      | 0.310275426  | 0.0761923 | -0.064165197 | 0.7134269 | 0.411051164  | 0.017852 |
| IDI1       | 0.014523028  | 0.91717   | 0.13857222   | 0.3205779 | 0.330382616  | 0.017855 |
| PMCHL1     | -1.162695138 | 0.0865106 | -0.704463813 | 0.2702332 | -1.63581692  | 0.017856 |
| TIMM17A    | 0.21337388   | 0.0538371 | 0.207645418  | 0.0590308 | 0.260572578  | 0.01793  |
| ZNF614     | -0.054598099 | 0.6814396 | -0.245620665 | 0.0639567 | -0.315665324 | 0.017965 |
| DBR1       | -0.178480641 | 0.3022569 | -0.02089998  | 0.9034823 | -0.409516756 | 0.017978 |
| SUMO3      | 0.10166402   | 0.272475  | 0.142355603  | 0.1224253 | 0.218092884  | 0.018001 |
| FABP3      | 0.197107463  | 0.5033138 | 0.309015672  | 0.2922224 | 0.691355275  | 0.018025 |
| AFG3L1P    | -0.150569917 | 0.3075055 | -0.184632216 | 0.2089796 | -0.34999855  | 0.018054 |
| RPL36AL    | -0.083345908 | 0.4799396 | 0.078264059  | 0.5060565 | 0.278091628  | 0.018071 |
| RARRES2    | 0.184647889  | 0.4492352 | 0.255862612  | 0.2890723 | 0.566701039  | 0.018085 |
| C4orf33    | 0.054483265  | 0.7117802 | 0.02663183   | 0.8547682 | 0.341100848  | 0.018093 |
| FAM124A    | 0.792334994  | 0.0564507 | 0.797012705  | 0.0503684 | 0.968279052  | 0.018124 |

|             |              |           |              |           |              |          |
|-------------|--------------|-----------|--------------|-----------|--------------|----------|
| CHRNA       | -0.531756837 | 0.1775674 | -0.158912155 | 0.6663115 | -0.944952467 | 0.018164 |
| RPS2P7      | 1.276416459  | 0.0576534 | 1.256365605  | 0.0573482 | 1.540485878  | 0.018201 |
| UNC13D      | 0.223195944  | 0.4882879 | 0.270132304  | 0.4010656 | 0.755764926  | 0.018194 |
| PTPN22      | 0.269403525  | 0.6106452 | 0.048515878  | 0.9279335 | 1.207545314  | 0.01827  |
| TBC1D30     | -0.358625952 | 0.0887421 | -0.07339486  | 0.7227221 | -0.491941123 | 0.018272 |
| P11-162P23  | 0.811636926  | 0.1355591 | 0.918280368  | 0.0904347 | 1.277479313  | 0.018313 |
| DND1P1      | 0.259305768  | 0.8605162 | -0.391132359 | 0.7923139 | -4.172409064 | 0.018364 |
| CGRRF1      | -0.341603479 | 0.0717762 | -0.214880345 | 0.2500048 | -0.447329051 | 0.018414 |
| GPR20       | -12.13727267 | 0.0923922 | -12.22239294 | 0.0901297 | 16.83192908  | 0.0185   |
| HSP90B2P    | -0.265009328 | 0.5490019 | -0.06229028  | 0.883901  | -1.128002321 | 0.018535 |
| NTN1        | 0.364613667  | 0.3006208 | 0.501011851  | 0.1536968 | 0.825169028  | 0.018546 |
| SYTL4       | 0.077919627  | 0.5927403 | -0.099585544 | 0.4935    | 0.340229452  | 0.018547 |
| CLDN19      | -0.174931442 | 0.6340522 | -0.309452497 | 0.3924179 | -0.914975752 | 0.018558 |
| C16orf87    | -0.100325233 | 0.4942048 | -0.031336291 | 0.8295251 | 0.340755041  | 0.018632 |
| CCNC        | -0.012618449 | 0.9018144 | -0.022920527 | 0.8221391 | 0.239232883  | 0.018728 |
| ITGB3BP     | -0.370458478 | 0.0667207 | -0.186475526 | 0.3540371 | -0.474375111 | 0.018747 |
| UPP1        | 0.466027834  | 0.1060729 | 0.055635078  | 0.8469583 | 0.672437283  | 0.018743 |
| PPP1R11     | 0.207050363  | 0.0725345 | 0.070338563  | 0.5411429 | 0.269729654  | 0.018797 |
| ZNF781      | -0.451878779 | 0.2343488 | -0.555938438 | 0.1410551 | -0.897528084 | 0.018822 |
| CTC-471F3.1 | -0.308360301 | 0.3531365 | -0.257877996 | 0.4229777 | -0.817724885 | 0.018897 |
| RASL12      | 0.720295777  | 0.1873897 | 0.035421182  | 0.9485737 | 1.271703384  | 0.018959 |
| P11-239L20  | -0.935061817 | 0.247357  | 0.074430337  | 0.9159425 | -2.4298091   | 0.01919  |
| PSMD8       | -0.024234603 | 0.8243716 | 0.185894505  | 0.0874292 | 0.254704527  | 0.019215 |
| ZNF652      | -0.100805082 | 0.4208873 | -0.229716238 | 0.0661497 | -0.293879217 | 0.019209 |
| MTMR1       | -0.086246282 | 0.5448631 | 0.231124951  | 0.1038206 | 0.332114679  | 0.019229 |
| CLHC1       | -0.391436184 | 0.0775067 | -0.053421047 | 0.8061021 | -0.51420372  | 0.019237 |
| HLA-DMB     | -0.332632713 | 0.5396405 | -0.841578816 | 0.1195061 | -1.318712952 | 0.019345 |
| EI24        | 0.172596067  | 0.1935118 | 0.047620582  | 0.7195263 | 0.309856675  | 0.019362 |
| ORMDL2      | 0.132908939  | 0.357591  | -0.16402909  | 0.2560621 | 0.336372269  | 0.019398 |
| RBMS1       | 0.094149572  | 0.2892815 | 0.070470608  | 0.4270025 | 0.207269053  | 0.019393 |
| RNASE4      | 0.132257002  | 0.4996761 | -0.17062478  | 0.3841712 | 0.456965577  | 0.019433 |
| MFSD7       | 0.224430607  | 0.2919474 | -0.383689635 | 0.0821556 | 0.488087569  | 0.019467 |
| SEC23B      | 0.076613824  | 0.557027  | -0.025174949 | 0.8467344 | 0.303933778  | 0.019457 |
| ARHGAP8     | -0.232864543 | 0.2688881 | -0.015783861 | 0.9399691 | -0.492073086 | 0.01965  |
| APOL6       | 0.232263894  | 0.1526503 | 0.080890733  | 0.6181519 | 0.377618966  | 0.019782 |
| IGDCC3      | 0.150162644  | 0.5947174 | -0.173704327 | 0.5384005 | -0.660311941 | 0.019777 |
| INPP5A      | 0.059724334  | 0.6367105 | 0.010145943  | 0.9357926 | 0.293442185  | 0.019779 |
| MST1L       | -0.513946386 | 0.2882876 | -0.481201676 | 0.3174794 | -1.176586138 | 0.019765 |
| TRPV3       | -0.334694736 | 0.2553583 | -0.206905502 | 0.4710637 | -0.680247653 | 0.019755 |
| TICRR       | -0.216555338 | 0.2234013 | -0.277391393 | 0.1174317 | -0.414850009 | 0.019793 |
| MTA1        | 0.11203796   | 0.3775209 | 0.049847287  | 0.6932576 | -0.296194054 | 0.01985  |
| PSME3       | 0.26071601   | 0.0628497 | 0.181600742  | 0.1943641 | 0.325861283  | 0.01989  |
| TMCO6       | 0.096464403  | 0.6119506 | -0.204647815 | 0.28114   | -0.447065324 | 0.019993 |
| KIAA0895L   | 0.126956184  | 0.5254179 | -0.143766366 | 0.4734287 | -0.469078548 | 0.020028 |
| ZNF34       | -0.250684639 | 0.1538917 | -0.192386163 | 0.2566585 | -0.408342438 | 0.020025 |
| FOXC1       | 1.17228888   | 0.1079704 | 1.057582577  | 0.1467805 | 1.691214276  | 0.020059 |
| BCO2        | -0.369737402 | 0.2617208 | 0.169563181  | 0.5972736 | -0.78019472  | 0.020089 |

|             |              |           |              |           |              |          |
|-------------|--------------|-----------|--------------|-----------|--------------|----------|
| CCT6P3      | -0.160994132 | 0.2172    | -0.239908847 | 0.063956  | -0.304357966 | 0.020093 |
| HOXC11      | -1.442285095 | 0.0802665 | -0.01528437  | 0.9844228 | -1.949675781 | 0.020098 |
| KANK4       | 0.763813179  | 0.0574386 | -0.005189555 | 0.9897896 | 0.93248499   | 0.020101 |
| AP1M1       | 0.078330985  | 0.5419521 | -0.060979534 | 0.6334879 | -0.299238968 | 0.02012  |
| GNG4        | -0.170753722 | 0.5840712 | 0.05510782   | 0.858906  | -0.729022946 | 0.020167 |
| LDHA        | -0.179674065 | 0.1524619 | 0.076224669  | 0.5436944 | 0.291577528  | 0.02018  |
| UBE2Q2P6    | 0.095774294  | 0.4096904 | 0.162593362  | 0.1613117 | 0.269654875  | 0.020178 |
| EMB         | -0.314832339 | 0.2437118 | -1.44E-05    | 0.9999571 | -0.628129709 | 0.02022  |
| MEF7-TICAM  | -0.466420988 | 0.1939318 | -0.23724416  | 0.5048991 | -0.836016862 | 0.020251 |
| P11-480I12  | -1.152747941 | 0.0690674 | -0.816657038 | 0.1697766 | -1.515638254 | 0.020397 |
| ARL8A       | 0.36481642   | 0.1008323 | 0.411335293  | 0.0627041 | 0.516178514  | 0.020427 |
| NLK         | 0.033513413  | 0.7575206 | -0.086652503 | 0.4196686 | -0.252233921 | 0.020495 |
| BEND6       | -0.342228624 | 0.5327883 | 0.802167108  | 0.1211025 | 1.203203401  | 0.020518 |
| GPD1L       | -0.127549583 | 0.3991134 | -0.153697744 | 0.3064795 | 0.345662305  | 0.020522 |
| E2F7        | 0.158919224  | 0.5513852 | 0.344363694  | 0.1960426 | 0.616008824  | 0.020579 |
| SHROOM3     | 0.211056107  | 0.1842656 | 0.120494761  | 0.4482302 | 0.367598738  | 0.020604 |
| MAFG        | 0.194746284  | 0.0838244 | -0.036630739 | 0.7447182 | 0.258254959  | 0.020683 |
| RDH11       | 0.027212972  | 0.8035497 | 0.03740162   | 0.7319677 | 0.252501911  | 0.020695 |
| EOGT        | 0.016371593  | 0.9099267 | 0.230768778  | 0.0971436 | 0.324199258  | 0.020738 |
| 15-Sep      | -0.00628278  | 0.9369951 | 0.007809321  | 0.9213157 | 0.182427369  | 0.020806 |
| ABHD1       | -0.493907502 | 0.3702173 | -0.860184317 | 0.1142308 | -1.352819758 | 0.02089  |
| KIDINS220   | -0.1139297   | 0.2386555 | -0.040941646 | 0.6712605 | -0.223211377 | 0.020922 |
| TAF8        | -0.096554998 | 0.3911293 | -0.019019834 | 0.8651203 | -0.261143759 | 0.020925 |
| SEC14L4     | 0.037649014  | 0.9143087 | 0.131260597  | 0.6985163 | -0.897025955 | 0.021072 |
| WDR1        | 0.122918656  | 0.216568  | 0.044270737  | 0.655971  | 0.229090354  | 0.021107 |
| KPNA1       | 0.178199239  | 0.0794583 | 0.138716774  | 0.1704006 | 0.233139036  | 0.021299 |
| MURC        | 0.131179985  | 0.7150323 | -0.138930029 | 0.6998084 | -0.909649951 | 0.021291 |
| RAB15       | 0.277018139  | 0.0751763 | 0.036788624  | 0.8134303 | 0.35762155   | 0.02134  |
| STK31       | -0.138285067 | 0.6962588 | 0.37340201   | 0.2785457 | 0.784745812  | 0.021356 |
| GNG5        | -0.052504212 | 0.6051427 | 0.190466215  | 0.0593003 | 0.232519223  | 0.021373 |
| PPP1CB      | 0.03813058   | 0.6524918 | 0.094895419  | 0.2615981 | 0.194490479  | 0.021391 |
| BAD         | 0.341893023  | 0.0772365 | 0.041075604  | 0.8320664 | 0.442651945  | 0.02142  |
| RP11-3L10.5 | 0.285549986  | 0.4926307 | -0.285181131 | 0.5009926 | -1.040791862 | 0.021413 |
| HSD17B11    | -0.350716572 | 0.0987171 | 0.026271347  | 0.901125  | -0.488172004 | 0.021452 |
| SLC38A1     | -0.003251414 | 0.9794739 | 0.138116727  | 0.2738389 | 0.290215499  | 0.02146  |
| PRAP1       | 0.015839617  | 0.9867824 | 0.726059147  | 0.4470827 | -2.212518669 | 0.021551 |
| VAT1        | -0.027119228 | 0.8510734 | -0.211388879 | 0.1430449 | -0.332814467 | 0.021569 |
| P11-192H23  | 0.053405801  | 0.7918946 | 0.156165672  | 0.4337644 | -0.479386956 | 0.021579 |
| BATF2       | -0.020460154 | 0.9648127 | -0.631348977 | 0.1802316 | -1.188449002 | 0.021644 |
| CHST2       | 0.59106343   | 0.0524384 | 0.475876935  | 0.1175502 | 0.696363698  | 0.021725 |
| KLHL26      | -0.304529651 | 0.2663643 | -0.109561613 | 0.6831309 | -0.632645081 | 0.021737 |
| PLEKHA3     | 0.164803988  | 0.236214  | 0.076381293  | 0.5823587 | 0.318147621  | 0.021778 |
| BOC         | 0.889693949  | 0.0581017 | 0.566442597  | 0.2280044 | 1.076047914  | 0.021838 |
| C19orf25    | -0.231894434 | 0.1074637 | -0.055957042 | 0.6939414 | -0.332669251 | 0.0219   |
| PIGCP1      | 0.04536932   | 0.8331785 | 0.119987676  | 0.5675146 | -0.5147796   | 0.02202  |
| GMPS        | -0.070435515 | 0.4777881 | 0.070823746  | 0.4733054 | 0.226229415  | 0.022035 |
| KLHDC4      | 0.12506285   | 0.4646318 | 0.145315753  | 0.3902912 | 0.387025877  | 0.022065 |

|           |              |           |              |           |              |          |
|-----------|--------------|-----------|--------------|-----------|--------------|----------|
| ANKRD16   | -0.169930629 | 0.4343359 | -0.368274903 | 0.0884318 | -0.500987441 | 0.02213  |
| IL1R2     | 0.602723862  | 0.1691463 | 0.553278555  | 0.2065641 | 0.993933316  | 0.022126 |
| DCLK2     | 0.180595031  | 0.5311265 | -0.370068266 | 0.2008856 | -0.667833558 | 0.022162 |
| GAP43     | 1.611703379  | 0.0952926 | 0.818630834  | 0.3987046 | 2.202294851  | 0.022186 |
| ARHGEF38  | 0.36525056   | 0.2455684 | 0.366241586  | 0.2435407 | 0.715799183  | 0.022217 |
| ENPP5     | -0.423272528 | 0.1088259 | -0.253616262 | 0.3269429 | -0.607524936 | 0.022241 |
| GTF2A2    | -0.078422378 | 0.4817741 | 0.213992964  | 0.0521098 | 0.252347975  | 0.022278 |
| KIAA1199  | -0.587108604 | 0.2682167 | -0.446766705 | 0.3992666 | -1.212705799 | 0.022316 |
| SUFU      | 0.248208309  | 0.1948453 | -0.072225714 | 0.7083465 | -0.454307173 | 0.022334 |
| CALCR     | -0.501215324 | 0.4734289 | -0.762697871 | 0.2731104 | -1.62941922  | 0.022372 |
| EIF3B     | 0.070046938  | 0.4664227 | 0.121617877  | 0.2052971 | 0.219309698  | 0.02237  |
| DCAF6     | 0.120641802  | 0.3296848 | 0.125436972  | 0.3097221 | 0.281598105  | 0.022467 |
| TRAF3IP1  | -0.370055354 | 0.05775   | 0.026815347  | 0.8895393 | -0.44301237  | 0.022487 |
| SLPI      | -0.156172207 | 0.7889982 | 0.471306518  | 0.4158863 | 1.316870749  | 0.022517 |
| NFASC     | 0.493371549  | 0.3348425 | 0.1280221    | 0.8013439 | 1.152897275  | 0.02253  |
| PRKCG     | 0.951644568  | 0.1763907 | -0.041775871 | 0.9544499 | 1.602939526  | 0.022642 |
| RANBP10   | 0.102529481  | 0.5201078 | -0.209899371 | 0.1891253 | -0.376397804 | 0.022629 |
| BSN       | 0.376714648  | 0.4406254 | -0.193631841 | 0.6923137 | -1.151877889 | 0.02268  |
| KCNK6     | -0.325918334 | 0.0769929 | -0.265566626 | 0.1483658 | -0.419697916 | 0.02269  |
| NT5C2     | 0.035273938  | 0.7340823 | -0.05514006  | 0.5951827 | 0.236055336  | 0.022697 |
| TCEB1     | 0.19250516   | 0.0581786 | 0.129782579  | 0.1984455 | 0.230160515  | 0.022688 |
| AMIGO1    | -0.3922489   | 0.058285  | -0.366481682 | 0.0671306 | -0.46484182  | 0.02274  |
| COLEC11   | -0.772511622 | 0.1731848 | -0.887791887 | 0.117305  | -1.29576791  | 0.022748 |
| PDE1B     | -0.502755493 | 0.2682197 | -0.52417747  | 0.2506772 | -1.04959409  | 0.022748 |
| WNK3      | 0.100383371  | 0.6354934 | 0.177986617  | 0.398549  | -0.485858615 | 0.022798 |
| CACNA1E   | -0.850627201 | 0.2780632 | -1.381669714 | 0.0770809 | -1.818513648 | 0.022813 |
| DLK2      | -0.655172502 | 0.0574924 | -0.13762876  | 0.6558322 | -0.779866406 | 0.022833 |
| SARS      | -0.020565922 | 0.8469635 | -0.00777054  | 0.9417219 | 0.241663312  | 0.022837 |
| SETD1B    | -0.09061105  | 0.6862867 | -0.216314113 | 0.3331437 | -0.517601883 | 0.022862 |
| SMLR1     | -0.129941982 | 0.8074694 | 0.459691816  | 0.3730675 | -1.301324997 | 0.022929 |
| ZNF566    | -0.140062961 | 0.4939803 | -0.256763899 | 0.2055507 | -0.463994326 | 0.022927 |
| TFF1      | 0.099338449  | 0.6587375 | -0.222217105 | 0.3231726 | 0.511506129  | 0.022947 |
| NPM1P26   | 0.288590256  | 0.2754111 | 0.396991066  | 0.1237886 | 0.582925991  | 0.023028 |
| PACSIN3   | -0.209932953 | 0.2537616 | -0.273212032 | 0.1367088 | -0.417693232 | 0.02303  |
| CCNE1     | -0.396586735 | 0.0583573 | -0.199872211 | 0.3370029 | -0.474952485 | 0.023102 |
| POLI      | -0.204297047 | 0.187265  | -0.090587182 | 0.5562466 | -0.351635546 | 0.023135 |
| CHMP2A    | -0.020111837 | 0.8009036 | -0.050360496 | 0.5240064 | 0.178325011  | 0.023148 |
| AQP1      | -0.49705264  | 0.3554578 | -0.428058442 | 0.4239777 | -1.245989313 | 0.023159 |
| C10orf11  | 0.100397319  | 0.8421244 | -0.719748716 | 0.1480158 | -1.159216886 | 0.023168 |
| ZNF865    | 0.138464689  | 0.592601  | -0.372403559 | 0.1592841 | -0.620744341 | 0.023209 |
| LUC7L3    | -0.221363982 | 0.1323401 | -0.12948536  | 0.3783226 | -0.334048283 | 0.023226 |
| EIF1B     | -0.180993972 | 0.1654457 | -0.112922317 | 0.3809211 | -0.295559545 | 0.02328  |
| GAB2      | -0.12280957  | 0.4574746 | 0.013382906  | 0.9349535 | 0.370717581  | 0.023299 |
| HID1      | 0.139156435  | 0.5066616 | -0.125752214 | 0.5485472 | 0.474407636  | 0.02326  |
| KPNA6     | 0.224155043  | 0.0583064 | 0.038338181  | 0.7461563 | 0.268500286  | 0.023297 |
| P11-430C7 | -0.325564751 | 0.6144812 | -0.569508131 | 0.3786677 | -1.747383832 | 0.023274 |
| MYO1H     | 0.473489328  | 0.4522835 | 0.716689231  | 0.2494566 | -1.483363997 | 0.023322 |

|           |              |           |              |           |              |          |
|-----------|--------------|-----------|--------------|-----------|--------------|----------|
| RORB      | 1.194343595  | 0.1374596 | 0.279464551  | 0.7301775 | 1.815123779  | 0.023331 |
| SCNN1B    | 0.523844032  | 0.4101428 | -0.166869854 | 0.7957544 | 1.431245546  | 0.023331 |
| KNG1      | -1.221322474 | 0.2199005 | 0.817628027  | 0.3764042 | -2.519460892 | 0.023365 |
| MAP4K1    | 0.036192881  | 0.9084039 | -0.494803922 | 0.1200893 | -0.737880996 | 0.023358 |
| SLC25A51  | 0.012646658  | 0.9020087 | -0.125070026 | 0.2198771 | -0.235098107 | 0.023397 |
| SPIN4     | -0.133922737 | 0.5484904 | 0.22130798   | 0.3183475 | -0.507591525 | 0.023397 |
| HEPH      | -0.165334258 | 0.5455474 | 0.027091051  | 0.9210927 | -0.620033583 | 0.023428 |
| CHRM2     | -0.008680217 | 0.9736547 | -0.252568213 | 0.336435  | -0.596466244 | 0.023477 |
| MYO7B     | -0.590557655 | 0.3549439 | 0.201044062  | 0.7523152 | -1.447428792 | 0.023578 |
| RAPGEF6   | -0.056186054 | 0.7015504 | -0.006380526 | 0.9651897 | 0.330671881  | 0.023627 |
| GRID1     | 0.368947141  | 0.5011049 | 1.033654675  | 0.050947  | 1.183833436  | 0.023643 |
| ARFGEF2   | 0.1405881    | 0.0862382 | -0.003111533 | 0.9696509 | 0.184632476  | 0.023725 |
| CHIC1     | -0.115438752 | 0.4620994 | -0.065817272 | 0.6721767 | -0.355703073 | 0.023726 |
| WDR65     | -1.220031441 | 0.0505755 | 0.223343603  | 0.7045204 | -1.335005943 | 0.02377  |
| TMSB4X    | 0.215347307  | 0.1488286 | 0.091640904  | 0.5389622 | 0.337105377  | 0.023812 |
| NDUFA9    | 0.398727793  | 0.0759786 | 0.21428674   | 0.3396228 | 0.507247135  | 0.023855 |
| RAP1GAP2  | 0.285781215  | 0.4708669 | 0.535284952  | 0.1745798 | 0.888426513  | 0.023894 |
| ALG1L13P  | -0.662890296 | 0.1879798 | -0.628894385 | 0.197873  | -1.222527558 | 0.023924 |
| TCEANC2   | -0.199985982 | 0.2456923 | -0.290997865 | 0.0852243 | -0.387795556 | 0.023915 |
| CDRT1     | 1.01259092   | 0.0983094 | 0.649002534  | 0.2788056 | 1.352746708  | 0.024044 |
| RPS24P8   | -0.227335282 | 0.7224686 | 0.595083664  | 0.2975746 | 1.239821279  | 0.024068 |
| DTX1      | 1.391033458  | 0.194701  | 0.578716508  | 0.59882   | 2.382139446  | 0.024099 |
| PITX1     | -0.009649006 | 0.9836301 | -0.032388654 | 0.9450514 | 1.03226295   | 0.024107 |
| SACS      | -0.182195276 | 0.279153  | 0.055074943  | 0.7430962 | -0.379634631 | 0.024132 |
| PROM1     | 0.063536671  | 0.746585  | 0.178238692  | 0.3639697 | 0.442243469  | 0.024193 |
| CBX1      | -0.216980715 | 0.1041404 | 0.031081146  | 0.8152142 | -0.300701313 | 0.024285 |
| CTTNBP2   | 0.158649942  | 0.7493671 | 0.295959545  | 0.5479427 | -1.134923824 | 0.024307 |
| CYP3A43   | -0.349139705 | 0.4022462 | 0.329978857  | 0.3873957 | -0.999394691 | 0.024306 |
| CXADR     | -0.033116072 | 0.8176258 | -0.276301845 | 0.0542733 | 0.322699321  | 0.024409 |
| PIGC      | -0.00287138  | 0.9785715 | 0.082431666  | 0.4335465 | 0.236638834  | 0.024404 |
| SLC7A9    | 0.966261928  | 0.1645966 | 1.079195821  | 0.1201679 | -1.652880694 | 0.0244   |
| YPEL2     | -0.045067121 | 0.8089566 | -0.149545795 | 0.4215833 | 0.416211023  | 0.024429 |
| CDA       | -0.509971475 | 0.3634433 | -0.197718123 | 0.7224512 | -1.28360246  | 0.024477 |
| NKAP      | -0.177171143 | 0.1805734 | -0.195333839 | 0.1367409 | -0.298023901 | 0.024496 |
| 2-Sep     | 0.081997221  | 0.1322922 | 0.097079777  | 0.0740112 | 0.122255155  | 0.024514 |
| PDZD3     | -0.303491844 | 0.6420478 | 0.094283325  | 0.8842544 | -1.484432378 | 0.024656 |
| TP53RK    | 0.183874849  | 0.1563082 | 0.052670955  | 0.6837363 | 0.289936089  | 0.024801 |
| PIDD      | -0.450276947 | 0.0749355 | -0.301691608 | 0.2310526 | -0.569393817 | 0.02483  |
| ENKUR     | -0.316116168 | 0.5902072 | 0.224753376  | 0.6922773 | 1.241011402  | 0.024853 |
| FUK       | -0.102295772 | 0.4997248 | -0.139116528 | 0.3562411 | -0.340063046 | 0.025054 |
| NDUFS1    | 0.036508915  | 0.6264445 | 0.098325718  | 0.1879877 | 0.167483413  | 0.025054 |
| RAB3C     | 0.816731329  | 0.2333752 | 0.39705282   | 0.5632687 | 1.523486726  | 0.025056 |
| ALPI      | 0.475482404  | 0.5894134 | 0.047790776  | 0.9570101 | -2.470257052 | 0.025141 |
| POC1B     | -0.052918206 | 0.7508565 | 0.094315541  | 0.5697634 | 0.370604193  | 0.025258 |
| P1-179N16 | -0.037477023 | 0.9339384 | -0.933104769 | 0.0544886 | -1.127996931 | 0.025377 |
| RPS3AP5   | 0.064254127  | 0.926835  | 0.450865596  | 0.5019054 | -1.997963356 | 0.025373 |
| ING1      | -0.139214213 | 0.3790486 | 0.194924325  | 0.2090409 | 0.347768649  | 0.02541  |

|            |              |           |              |           |              |          |
|------------|--------------|-----------|--------------|-----------|--------------|----------|
| CLTB       | 0.080031633  | 0.6426305 | 0.194362945  | 0.2574893 | 0.383004756  | 0.025448 |
| AKT1       | 0.176651555  | 0.0927716 | -0.09573444  | 0.3622175 | 0.234487955  | 0.025459 |
| SEC22A     | 0.225567358  | 0.2381503 | -0.112590917 | 0.5554519 | 0.425092738  | 0.025505 |
| SLC8A1     | -0.053171212 | 0.874892  | 0.572968327  | 0.0891704 | -0.756210541 | 0.025495 |
| VAPB       | -0.018702675 | 0.854567  | 0.006685852  | 0.9473993 | 0.226156526  | 0.025502 |
| CAP1       | -0.025177949 | 0.7924067 | 0.078887224  | 0.408978  | 0.213277874  | 0.025541 |
| SIRT5      | 0.034005248  | 0.8317226 | 0.066209424  | 0.6778771 | 0.355056528  | 0.025558 |
| GFRA2      | 1.054365247  | 0.4218911 | 1.148500493  | 0.3667145 | 2.7737118    | 0.025642 |
| ZNF668     | -0.066334507 | 0.8218859 | -0.346416442 | 0.2375085 | -0.660293935 | 0.025647 |
| SH2B1      | -0.148730913 | 0.4496711 | -0.28495206  | 0.1467961 | -0.43973506  | 0.025719 |
| FAM171A2   | 0.061921478  | 0.8269125 | -0.227263729 | 0.4221803 | -0.636466118 | 0.025788 |
| ZNF527     | -0.015722891 | 0.9319078 | 0.025850742  | 0.8865434 | -0.41036837  | 0.025863 |
| PPP1CA     | 0.020350952  | 0.8034234 | 0.078653452  | 0.3330286 | 0.180745504  | 0.026062 |
| RASA4      | -0.078669464 | 0.7541366 | 0.143439286  | 0.5666267 | -0.562289224 | 0.026058 |
| R5-ARHGA   | -0.014527967 | 0.9853255 | 0.015741638  | 0.9840362 | 1.73369008   | 0.026164 |
| TAS1R3     | -0.234963319 | 0.3898079 | -0.460262304 | 0.0917226 | -0.625591897 | 0.026215 |
| SWSAP1     | -0.368669403 | 0.0843602 | -0.141909518 | 0.4890911 | -0.473081389 | 0.026293 |
| HMG2N2P46  | 0.281247652  | 0.293685  | -0.351184534 | 0.1970052 | 0.571439829  | 0.026329 |
| CDK7       | 0.647394809  | 0.149071  | 0.3657025    | 0.415034  | 0.992382728  | 0.02645  |
| BCL2L2     | 0.213226508  | 0.0911909 | -0.075890428 | 0.547344  | 0.2781364    | 0.026509 |
| ELMO2      | 0.060923937  | 0.6434229 | -0.002942454 | 0.9820788 | -0.292346767 | 0.026501 |
| RHBDL1     | -0.744324062 | 0.0587335 | -0.671039744 | 0.080497  | -0.887642786 | 0.026496 |
| CPA3       | 0.827265545  | 0.2049006 | -1.176790024 | 0.0899643 | 1.41474058   | 0.026523 |
| TLDC2      | -0.138049359 | 0.8579736 | 0.500597816  | 0.5114239 | -1.813746492 | 0.026531 |
| AMOTL1     | 0.06573882   | 0.6656931 | 0.02970828   | 0.8449537 | -0.33732637  | 0.026661 |
| SPATA25    | -1.144120524 | 0.0629621 | -0.816620879 | 0.1530581 | -1.385796826 | 0.026664 |
| TM6SF2     | -0.558899255 | 0.3348946 | 0.238951223  | 0.676767  | -1.300357621 | 0.026659 |
| KLHL32     | 0.486776041  | 0.5088444 | -0.458448335 | 0.5349948 | -1.857544075 | 0.026676 |
| P4-631H13  | -1.405481931 | 0.0626122 | -1.312749484 | 0.0726868 | -1.701548377 | 0.026699 |
| GALNT10    | 0.253931273  | 0.1754514 | 0.359083423  | 0.0548218 | 0.414043686  | 0.026724 |
| PKD1L1     | 0.27919103   | 0.5418219 | -0.484996582 | 0.2958602 | 1.011068494  | 0.026796 |
| BCL11A     | -0.459528578 | 0.152777  | 0.046432365  | 0.8838147 | -0.710424249 | 0.026851 |
| CACNG6     | 0.303245931  | 0.5014486 | -0.026581713 | 0.9531255 | 0.982169115  | 0.026817 |
| FBXO36     | 0.10260445   | 0.4835401 | 0.174404531  | 0.2224964 | 0.313279347  | 0.026846 |
| P11-797H7  | -0.26359073  | 0.6530924 | -0.21720775  | 0.7032243 | -1.514009183 | 0.026846 |
| EIF3A      | 0.147059377  | 0.080348  | 0.068461869  | 0.4153064 | 0.185936922  | 0.026924 |
| PLA2G12B   | -0.67752241  | 0.4938263 | 0.444508843  | 0.6501566 | -2.251488371 | 0.026946 |
| INHA       | 0.022740261  | 0.93635   | 0.032926977  | 0.9076518 | 0.623491376  | 0.027035 |
| ITGA2      | 0.469547545  | 0.0938819 | 0.491206444  | 0.0795494 | 0.619432946  | 0.027035 |
| USP32      | 0.080240103  | 0.4387321 | 0.120469272  | 0.2425234 | 0.227735214  | 0.027031 |
| IGFBP3     | -0.317472312 | 0.3912931 | -0.237281879 | 0.5216351 | -0.818876575 | 0.02705  |
| NFYA       | 0.059888061  | 0.6275332 | -0.202566615 | 0.1009429 | -0.273333959 | 0.027121 |
| RNF13      | -0.034041933 | 0.7742484 | 0.054754533  | 0.6426982 | 0.260485832  | 0.027172 |
| XK         | -0.060000285 | 0.7851008 | -0.183035433 | 0.4051781 | 0.484394654  | 0.02718  |
| P11-347C18 | -1.020651612 | 0.1263133 | -0.553695846 | 0.3850271 | -1.519646488 | 0.027405 |
| TNFRSF25   | -0.29337762  | 0.219819  | -0.059130888 | 0.8023758 | -0.540229948 | 0.027414 |
| SPTLC2     | -0.113264945 | 0.3600977 | -0.196946969 | 0.1112436 | 0.272171449  | 0.027434 |

|            |              |           |              |           |              |          |
|------------|--------------|-----------|--------------|-----------|--------------|----------|
| CHCHD7     | 0.004480994  | 0.9696267 | 0.100945165  | 0.388     | 0.257468433  | 0.027462 |
| OTUD4      | 0.189444592  | 0.1006194 | 0.216273426  | 0.0602827 | 0.253572023  | 0.027596 |
| CYP51A1    | 0.162666946  | 0.2324889 | 0.065508918  | 0.6305368 | 0.299964029  | 0.027618 |
| DAG1       | 0.154804023  | 0.2838979 | 0.052320016  | 0.7170861 | 0.317771878  | 0.027642 |
| GLCCI1     | -0.391976445 | 0.122793  | -0.312291554 | 0.2176774 | -0.561977795 | 0.027678 |
| LIX1       | -0.404083515 | 0.4376976 | 0.737896969  | 0.1549516 | -1.1497489   | 0.027691 |
| EEF1A1P25  | 0.641102593  | 0.1661703 | 0.654616892  | 0.1487325 | 0.980695924  | 0.027769 |
| ESM1       | 1.043018149  | 0.3275938 | 1.123029043  | 0.2828028 | 2.265770443  | 0.027795 |
| P11-848G14 | 0.115367837  | 0.6493552 | 0.129851213  | 0.6052729 | -0.57385666  | 0.027784 |
| ZNF396     | -0.420349117 | 0.1824935 | -0.311453223 | 0.3118557 | -0.691283915 | 0.027793 |
| GBP6       | -0.377368902 | 0.3958464 | -0.378990472 | 0.3850784 | 0.900628984  | 0.027881 |
| LGALS4     | -0.298391949 | 0.5944684 | 0.043568699  | 0.9380292 | -1.232592754 | 0.027915 |
| DRG1       | -0.186731213 | 0.051059  | -0.027024475 | 0.7762059 | -0.209749534 | 0.027938 |
| CTNS       | 0.104097431  | 0.5044397 | -0.070099947 | 0.6527588 | 0.340577051  | 0.027952 |
| CDK18      | 0.110674485  | 0.6524753 | 0.082199103  | 0.7372265 | -0.548553101 | 0.027966 |
| EML2       | 0.191227416  | 0.3621384 | 0.005290943  | 0.9798467 | 0.459413123  | 0.027985 |
| GPR133     | -0.029211685 | 0.920877  | -0.038177306 | 0.8966488 | -0.64850977  | 0.028122 |
| APBB2      | 2.10E-05     | 0.9999097 | 0.235255072  | 0.2045339 | 0.405950909  | 0.028174 |
| CYB5B      | -0.137255074 | 0.1077825 | 0.116897649  | 0.1684525 | 0.186379483  | 0.028204 |
| PALM3      | -0.48684147  | 0.1190342 | -0.562206808 | 0.0670309 | -0.692647375 | 0.028219 |
| ENOX2      | 0.066821951  | 0.760678  | 0.302704718  | 0.1639349 | 0.472504475  | 0.028239 |
| RAB25      | 0.216269285  | 0.185269  | -0.052756735 | 0.7466835 | 0.357385918  | 0.028345 |
| HTR7       | -0.678100418 | 0.3821574 | -0.68362788  | 0.3757699 | -1.750975608 | 0.028462 |
| OR52K3P    | -0.129076812 | 0.8191465 | -0.614965012 | 0.2770418 | -1.250467362 | 0.028488 |
| RPAIN      | -0.078598111 | 0.3914928 | -0.062845006 | 0.4876392 | -0.200834461 | 0.028458 |
| RRP12      | 0.211251247  | 0.1930507 | 0.213049518  | 0.1887202 | 0.3549333    | 0.028484 |
| SGCZ       | 0.045460611  | 0.9220718 | 0.018858806  | 0.9667916 | -1.175323728 | 0.028461 |
| GUCY2C     | 0.004066296  | 0.9960318 | 0.446673892  | 0.5846395 | -1.79710165  | 0.028527 |
| VSTM5      | 0.172617729  | 0.6684218 | 0.109057499  | 0.7836236 | 0.838748496  | 0.028527 |
| ACTBL2     | 1.249106034  | 0.1795465 | 1.413868479  | 0.1203637 | 1.95492222   | 0.028597 |
| DOK5       | 1.003144218  | 0.3839396 | 0.208844938  | 0.8561514 | 2.423999373  | 0.028697 |
| ARHGAP21   | -0.009531108 | 0.9416438 | -0.010633195 | 0.9348234 | 0.28414278   | 0.028803 |
| CDC42P6    | -1.015501496 | 0.383694  | -0.585578903 | 0.6054383 | -2.991171223 | 0.028806 |
| UQCC1      | -0.068688815 | 0.5470536 | -0.145919661 | 0.1978548 | -0.249452564 | 0.028818 |
| IL1RAPL2   | 0.98205875   | 0.1281672 | 0.72901826   | 0.256965  | 1.410653404  | 0.028853 |
| ORM2       | 0.352391241  | 0.6554358 | 0.718213773  | 0.3493372 | 1.634777229  | 0.028914 |
| ADSSL1     | 0.184606813  | 0.4996455 | -0.452108032 | 0.0970601 | -0.615545416 | 0.029037 |
| RXRB       | 0.034210239  | 0.807579  | -0.170180523 | 0.2270806 | -0.308389686 | 0.029021 |
| SCN3A      | -0.452659238 | 0.3655092 | -0.62928417  | 0.2084889 | -1.10465317  | 0.029038 |
| BCHE       | -0.231234953 | 0.5225035 | 0.70151895   | 0.0519055 | -0.790437523 | 0.02906  |
| VSIG10L    | -0.199180829 | 0.5021843 | -0.200205578 | 0.495215  | -0.662727604 | 0.029053 |
| DHRS1      | -0.228556075 | 0.1067465 | -0.204702374 | 0.1474345 | -0.308841505 | 0.029179 |
| NDUFB4     | -0.035650802 | 0.7111918 | 0.024306022  | 0.7991189 | 0.207856503  | 0.029244 |
| LANCL2     | 0.013054868  | 0.9178621 | 0.13875608   | 0.270156  | 0.273961464  | 0.02936  |
| FKBP2      | -0.056562543 | 0.6605579 | -0.028075258 | 0.8265961 | 0.277757082  | 0.029565 |
| KLF7       | 0.314629556  | 0.2529365 | 0.097331285  | 0.72349   | 0.596744394  | 0.029533 |
| RMND1      | -0.267215662 | 0.0551311 | -0.091072951 | 0.5048188 | -0.302268385 | 0.029513 |

|            |              |           |              |           |              |          |
|------------|--------------|-----------|--------------|-----------|--------------|----------|
| PAWR       | -0.000249199 | 0.9985655 | 0.060617579  | 0.6605396 | 0.299592344  | 0.029593 |
| PLGRKT     | 0.020692103  | 0.9074958 | 0.100804582  | 0.5641527 | 0.377042807  | 0.029769 |
| LYSMD1     | -0.293722859 | 0.1758101 | -0.166602046 | 0.4302787 | -0.468486103 | 0.029912 |
| PTPRB      | -0.43362075  | 0.0838981 | -0.093619353 | 0.7057832 | -0.544950126 | 0.029901 |
| ZNF622     | -0.135390886 | 0.2050145 | -0.201420647 | 0.057485  | -0.231451943 | 0.029931 |
| MRPL1      | -0.295994875 | 0.0566193 | -0.255404556 | 0.0969956 | -0.335355262 | 0.029968 |
| CHMP4BP1   | 0.729458132  | 0.128488  | 0.690471204  | 0.1449038 | 1.014273828  | 0.030009 |
| A4GALT     | -0.948911723 | 0.3069631 | 0.516712399  | 0.5493723 | 1.837029724  | 0.030046 |
| P11-405L18 | -0.382195851 | 0.5000858 | 0.036189508  | 0.9457905 | -1.383579082 | 0.030051 |
| CYP2C58P   | 0.702315511  | 0.3054796 | 0.717835336  | 0.2859548 | 1.409352243  | 0.030086 |
| DUSP8P5    | -0.461820923 | 0.1825493 | -0.187752805 | 0.5634418 | -0.770743538 | 0.030084 |
| SPATA6L    | 0.1977861    | 0.3230643 | -0.009084318 | 0.9635879 | 0.429220883  | 0.030096 |
| SLC50A1    | 0.094561896  | 0.4897369 | -0.153686607 | 0.2614112 | 0.294926053  | 0.030153 |
| PTPN2P1    | -0.837357762 | 0.376177  | -0.655222639 | 0.4691611 | -2.753971362 | 0.0302   |
| ABR        | 0.036784161  | 0.9039015 | 0.017479339  | 0.954898  | -0.680849118 | 0.030289 |
| BTBD10     | 0.08358458   | 0.3523715 | -0.002696148 | 0.9760057 | 0.193689165  | 0.030286 |
| UBQLN1     | 0.018060471  | 0.8772492 | 0.144435716  | 0.2158393 | 0.252799726  | 0.030297 |
| NDUFAF2    | -0.093382683 | 0.5838485 | 0.313780492  | 0.0603971 | 0.362179198  | 0.03035  |
| HSPBP1     | 0.146432252  | 0.4026423 | 0.296853639  | 0.0864414 | 0.372537667  | 0.030374 |
| CROCC      | -0.232010224 | 0.235433  | -0.221304617 | 0.2559011 | -0.424047701 | 0.030444 |
| ZNF3       | -0.143938494 | 0.1674338 | -0.103518356 | 0.3175767 | -0.225382941 | 0.030475 |
| KCNJ2      | 0.211153136  | 0.6875422 | -0.143423766 | 0.785557  | 1.117282112  | 0.030506 |
| MYO1F      | -0.148123333 | 0.6413862 | 0.319472426  | 0.2884926 | -0.714653545 | 0.030527 |
| SETDB1     | -0.071824836 | 0.4629887 | -0.122287599 | 0.2098011 | -0.211973287 | 0.030541 |
| TTC22      | 0.500095781  | 0.1492322 | 0.353141573  | 0.3081638 | 0.747743808  | 0.030557 |
| KLHL14     | -0.885883349 | 0.0880827 | -0.356428827 | 0.4889253 | -1.122953632 | 0.030645 |
| AL139099.1 | -0.285975501 | 0.4947807 | 0.150371704  | 0.7025923 | -0.967965818 | 0.030674 |
| CCDC88B    | -0.258132193 | 0.3706458 | -0.55728806  | 0.0514408 | -0.624836777 | 0.030673 |
| CCL7       | 1.334817753  | 0.1223592 | 0.133255557  | 0.8818449 | 1.837275267  | 0.030681 |
| RAB17      | -0.249807688 | 0.2759222 | -0.413332897 | 0.0714544 | -0.501056635 | 0.030708 |
| RRP15      | 0.175255164  | 0.2656586 | 0.135000321  | 0.3899624 | 0.339480253  | 0.030701 |
| IDH2       | -0.12101997  | 0.3288735 | 0.049058039  | 0.6909475 | -0.267759001 | 0.030773 |
| GSAP       | 0.150453122  | 0.3617471 | 0.127137404  | 0.4376697 | 0.353267123  | 0.030949 |
| B4GALNT2   | -0.363417427 | 0.0614843 | 0.003899793  | 0.9837333 | -0.418134989 | 0.030976 |
| MRPL50     | 0.068159234  | 0.5255248 | 0.175366093  | 0.0998315 | 0.230068945  | 0.030987 |
| ASPN       | -0.105549096 | 0.6950262 | -0.266659834 | 0.3218628 | -0.581037105 | 0.03105  |
| ZNF281     | -0.111576071 | 0.2620723 | -0.06829858  | 0.4906973 | -0.214823574 | 0.031063 |
| DMC1       | -0.172186928 | 0.6484901 | -0.057319595 | 0.874638  | -0.816372231 | 0.031127 |
| BACE2      | 0.257095711  | 0.2164859 | 0.07614033   | 0.7142538 | 0.447703637  | 0.031167 |
| DIRC2      | 0.034604005  | 0.8190879 | 0.281438381  | 0.0605239 | 0.323296109  | 0.03121  |
| C2orf42    | -0.089779415 | 0.5513543 | -0.076276638 | 0.6085456 | -0.32409723  | 0.031222 |
| _RRC37A4F  | -0.128818917 | 0.508161  | 0.048211102  | 0.801372  | -0.421910128 | 0.031297 |
| P5-1180C1C | -0.117355693 | 0.6592402 | -0.221374812 | 0.4006544 | -0.590050956 | 0.031311 |
| LRP12      | 0.191457959  | 0.3038732 | 0.140174507  | 0.4504387 | 0.399651527  | 0.031331 |
| CLRN3      | -0.480791978 | 0.3775632 | -0.107145283 | 0.8436779 | -1.175528439 | 0.031598 |
| DENND5B    | -0.312649534 | 0.1378285 | -0.20621238  | 0.3216238 | -0.449623312 | 0.031609 |
| FAM35A     | -0.161875794 | 0.1111584 | 0.165245199  | 0.0985685 | 0.215270061  | 0.031587 |



|            |              |           |              |           |              |          |
|------------|--------------|-----------|--------------|-----------|--------------|----------|
| OIT3       | -1.409229093 | 0.1565634 | 0.359273847  | 0.7018765 | -2.230893864 | 0.031547 |
| PIH1D1     | 0.009709895  | 0.9428278 | 0.136562697  | 0.3097902 | 0.288805307  | 0.031506 |
| P11-486G15 | -0.841079172 | 0.1104532 | -0.689316496 | 0.1656485 | -1.171054104 | 0.031519 |
| P11-823P9  | -1.166471471 | 0.0752756 | -0.280765594 | 0.6536034 | -1.417448078 | 0.031766 |
| P11-680G24 | 0.191523102  | 0.6308827 | -0.273038948 | 0.5042687 | -0.982838853 | 0.031794 |
| RBCK1      | 0.068810165  | 0.6050911 | -0.193685309 | 0.1461033 | -0.287054135 | 0.031828 |
| ELFN2      | -0.227746481 | 0.7219919 | -0.578494511 | 0.3636053 | -1.390549973 | 0.03185  |
| BICD2      | -0.158788996 | 0.1392315 | -0.188850098 | 0.0777725 | -0.230085129 | 0.031876 |
| FAM20B     | -0.042007216 | 0.5080905 | 0.026403033  | 0.6747026 | 0.134938292  | 0.031903 |
| CDH3       | -0.322022727 | 0.0566752 | 0.126119682  | 0.4547327 | -0.362588725 | 0.031924 |
| PNP        | 0.075123135  | 0.5350381 | -0.089372417 | 0.4601558 | 0.258945096  | 0.031957 |
| ARHGAP24   | 0.288548825  | 0.1441622 | -0.093486829 | 0.6396871 | 0.419903699  | 0.032108 |
| PEX10      | 0.115659679  | 0.3591274 | 0.189493365  | 0.1275024 | 0.26546464   | 0.032113 |
| MTSS1      | 0.306629132  | 0.2045421 | 0.220675882  | 0.3609538 | 0.514947884  | 0.032151 |
| ETV4       | -0.030114887 | 0.870603  | 0.051662836  | 0.7796038 | -0.396937911 | 0.032212 |
| RSRC1      | 0.049227664  | 0.659371  | 0.065635625  | 0.5532282 | 0.236732576  | 0.032205 |
| TRAM2      | 0.08133013   | 0.4687659 | -0.100961964 | 0.3677093 | -0.241590659 | 0.032304 |
| PIP4K2C    | 0.034450055  | 0.8329801 | -0.20110338  | 0.219525  | 0.347764669  | 0.032322 |
| IFT46      | -0.181627754 | 0.1809699 | -0.088823332 | 0.5086602 | -0.291077993 | 0.032346 |
| SIRT1      | 0.242665952  | 0.0627363 | 0.122951114  | 0.3442001 | 0.277789889  | 0.032454 |
| BUD31      | 0.009906287  | 0.9333363 | 0.085654892  | 0.4668941 | 0.251216873  | 0.032473 |
| BFSP1      | -0.222474769 | 0.3553831 | -0.216718408 | 0.3619233 | -0.517449192 | 0.032541 |
| TBX20      | -1.555501564 | 0.1266632 | -1.707017153 | 0.0909683 | -2.284218915 | 0.032539 |
| RASSF7     | -0.012929428 | 0.9781704 | -0.134969189 | 0.7742732 | -1.018055457 | 0.032573 |
| FABP4      | 0.434803406  | 0.4711742 | 0.963797513  | 0.0997026 | 1.239737878  | 0.032603 |
| SUPT20H    | -0.194492874 | 0.069909  | -0.023640532 | 0.8246319 | -0.229173377 | 0.03263  |
| HAUS8      | -0.289464047 | 0.1288132 | -0.304969662 | 0.1087897 | -0.407740096 | 0.032651 |
| P1-296G17  | -0.62195767  | 0.3334514 | -0.397468217 | 0.5203975 | -1.493783789 | 0.032675 |
| ARHGAP26   | 0.349229751  | 0.079595  | 0.327291983  | 0.0997129 | 0.424484092  | 0.032717 |
| AFAP1      | 0.252262924  | 0.0935205 | 0.132691627  | 0.3766701 | 0.320616383  | 0.032761 |
| CD2AP      | 0.090470694  | 0.4606416 | -0.118832041 | 0.332428  | 0.261504614  | 0.032752 |
| ZNRF2      | -0.066851923 | 0.7252529 | 0.024974802  | 0.89532   | 0.403595163  | 0.032749 |
| NRBP1      | -0.085923539 | 0.3846504 | -0.132309435 | 0.1799458 | -0.210857323 | 0.032785 |
| ISCA2      | -0.068693551 | 0.6484727 | -0.193831137 | 0.1931006 | -0.322319366 | 0.032795 |
| MTFMT      | 0.260619007  | 0.0577861 | 0.196197066  | 0.1473369 | 0.290441375  | 0.032825 |
| ZNF829     | -0.184393681 | 0.3896397 | -0.256397723 | 0.2285315 | -0.45906182  | 0.032834 |
| CFI        | -0.002988465 | 0.9913086 | 0.057702447  | 0.8332903 | 0.584201435  | 0.032949 |
| SCN9A      | 0.027641637  | 0.8990934 | -0.274470169 | 0.208751  | 0.462701802  | 0.033085 |
| ZNF318     | -0.222118642 | 0.1383656 | -0.159904396 | 0.28391   | -0.319282685 | 0.033136 |
| TMPRSS4    | 0.313878274  | 0.153083  | -0.004798731 | 0.9825764 | 0.467756438  | 0.033165 |
| RPL4P6     | 0.532973173  | 0.2346391 | 0.403020073  | 0.3654452 | 0.925683883  | 0.033229 |
| SYVN1      | 0.099068477  | 0.6093571 | -0.331185399 | 0.0889302 | -0.415301714 | 0.033257 |
| P11-210K20 | 0.588098933  | 0.2594854 | 0.595559836  | 0.2480738 | -1.282251801 | 0.033343 |
| TMX3       | -0.168397233 | 0.1622317 | 0.131036564  | 0.2741267 | -0.255703197 | 0.033419 |
| DLK1       | -0.275778808 | 0.631539  | -0.800421962 | 0.1640705 | -1.224094348 | 0.033452 |
| ORC5       | -0.219542759 | 0.1072516 | -0.178541444 | 0.1814185 | -0.287462492 | 0.033449 |
| PPP1R37    | -0.166096455 | 0.2599171 | -0.136141879 | 0.3547176 | -0.313453489 | 0.033511 |

|            |              |           |              |           |              |          |
|------------|--------------|-----------|--------------|-----------|--------------|----------|
| CA4        | -0.251984273 | 0.7868391 | 1.05905885   | 0.2520025 | -2.024646197 | 0.033573 |
| EIF3D      | 0.130984363  | 0.1913597 | 0.13173919   | 0.1879362 | 0.212633217  | 0.033574 |
| YPEL5      | 0.193084517  | 0.1060493 | 0.059727161  | 0.6163541 | 0.253077391  | 0.033601 |
| ZNF623     | -0.171716007 | 0.3063618 | -0.303592394 | 0.0697643 | -0.357078336 | 0.033695 |
| SLC46A3    | -0.577505055 | 0.1075785 | 0.355193918  | 0.3068303 | -0.768808504 | 0.033722 |
| UBE2B      | 0.171255739  | 0.1874458 | 0.176813461  | 0.1699334 | 0.27378581   | 0.033754 |
| SYMPK      | 0.046477194  | 0.7473988 | 0.260497749  | 0.0697446 | 0.30565082   | 0.033801 |
| SS18L1     | -0.208550551 | 0.1977699 | -0.306239331 | 0.0579089 | -0.343314638 | 0.033843 |
| DDX10      | -0.098667207 | 0.5932577 | 0.310997049  | 0.0896736 | 0.389541889  | 0.03391  |
| PGAP3      | -0.08781414  | 0.592862  | -0.181492272 | 0.2648621 | 0.340503434  | 0.033962 |
| CLTC       | 0.104733864  | 0.1224298 | 0.042606091  | 0.5294651 | 0.143559431  | 0.034055 |
| ACYP1      | -0.238799528 | 0.3171968 | -0.459122753 | 0.0538867 | -0.509931428 | 0.034084 |
| C21orf62   | -0.29457068  | 0.4862038 | -0.442575744 | 0.2899005 | -0.926358757 | 0.034084 |
| PRR5       | -0.149242465 | 0.3802075 | -0.278803928 | 0.0976016 | -0.360240951 | 0.034112 |
| QRSL1P3    | 0.237532789  | 0.5665368 | -0.274768716 | 0.5176387 | -0.98828588  | 0.034175 |
| NLRP2      | -0.417043698 | 0.2081366 | -0.014919591 | 0.9639219 | -0.708959021 | 0.034243 |
| FAM171B    | 0.484622414  | 0.2436324 | 0.38076761   | 0.3593003 | 0.877758474  | 0.034291 |
| VTN        | 0.02655693   | 0.9710271 | 0.847812832  | 0.2458507 | -1.551931095 | 0.034294 |
| MLLT3      | -0.112981098 | 0.692152  | 0.027576647  | 0.9227583 | -0.605479621 | 0.034363 |
| CD302      | 0.565588113  | 0.1210958 | 0.214069623  | 0.5575872 | 0.770463376  | 0.034439 |
| DNM1P51    | 0.177931187  | 0.6799855 | -0.201742682 | 0.6400419 | -0.921349249 | 0.034422 |
| TMEM234    | 0.140304138  | 0.4644553 | 0.14542789   | 0.4434214 | 0.401665162  | 0.034427 |
| UBA6       | 0.056125272  | 0.5242472 | 0.072427694  | 0.4099657 | 0.185866794  | 0.034436 |
| CBY1       | -0.25691739  | 0.4135296 | -0.422293673 | 0.1778512 | -0.668741161 | 0.034522 |
| TECR       | 0.103823811  | 0.4351093 | -0.091094723 | 0.4933426 | 0.28044122   | 0.034547 |
| KCTD12     | 0.23031345   | 0.2722759 | -0.141698715 | 0.4994967 | -0.443812032 | 0.034577 |
| MEF2C      | 0.027986629  | 0.9322831 | 0.004652376  | 0.9887052 | -0.69888559  | 0.034624 |
| PLIN4      | 0.152398835  | 0.5725437 | -0.515596965 | 0.0611074 | -0.586988098 | 0.034616 |
| PNRC2      | 0.110656729  | 0.1098668 | 0.072470714  | 0.2938824 | 0.145910005  | 0.034617 |
| PRKAR2A    | -0.09923314  | 0.4227324 | 0.169795668  | 0.1690493 | 0.260726911  | 0.034634 |
| RBM12      | 0.053813493  | 0.7440017 | 0.321197213  | 0.0510565 | 0.347789698  | 0.034669 |
| P4-539M6.1 | 0.350792256  | 0.4540718 | 0.832491687  | 0.0736626 | 0.982366876  | 0.034709 |
| TMEM177    | -0.271801844 | 0.133839  | -0.100930557 | 0.5693711 | -0.381693145 | 0.034719 |
| CRYAB      | -1.038195019 | 0.1083336 | -0.706376478 | 0.2590718 | -1.377836684 | 0.034789 |
| NTHL1      | -0.078414437 | 0.6745409 | -0.29756814  | 0.1089855 | -0.398674763 | 0.034785 |
| WFDC2      | 0.269008645  | 0.3407759 | -0.009948402 | 0.9719124 | 0.594516361  | 0.034849 |
| RAB37      | -0.36882774  | 0.3146721 | -0.234168076 | 0.5203721 | -0.777640618 | 0.034882 |
| ZNF512     | -0.026589607 | 0.834575  | -0.149948188 | 0.2368597 | -0.269110122 | 0.035005 |
| BTN3A1     | -0.124851479 | 0.4509983 | -0.143737192 | 0.3829008 | -0.349814358 | 0.035033 |
| DDHD1      | 0.216627021  | 0.3022639 | 0.243762898  | 0.2463162 | 0.440991246  | 0.035036 |
| SYPL1      | -0.094755513 | 0.3312687 | -0.136555556 | 0.1596493 | 0.203663052  | 0.035174 |
| MDP1       | -0.620608325 | 0.1740164 | -0.391376325 | 0.3877653 | -0.964693958 | 0.035238 |
| RPS29      | 0.152632617  | 0.2915988 | 0.222614543  | 0.1236107 | 0.304498528  | 0.035226 |
| AGAP4      | 0.158426938  | 0.6794592 | -0.671254857 | 0.0829056 | -0.809351793 | 0.035287 |
| SLC22A3    | -0.220598123 | 0.6187185 | -0.111776694 | 0.799834  | -0.94475624  | 0.035304 |
| MTPAP      | 0.154927575  | 0.199911  | 0.118449847  | 0.3246719 | 0.253313381  | 0.035349 |
| DPF2       | 0.030258921  | 0.8005652 | -0.030791448 | 0.7960961 | -0.252879007 | 0.035455 |

|            |              |           |              |           |              |          |
|------------|--------------|-----------|--------------|-----------|--------------|----------|
| MEF2A      | 0.103046154  | 0.3566655 | 0.081914004  | 0.4632923 | 0.234620044  | 0.035428 |
| P11-380M21 | 1.650667619  | 0.1292902 | 1.504164639  | 0.1657927 | 2.250106853  | 0.035452 |
| RPL23AP7   | -0.094904222 | 0.6225238 | -0.256016681 | 0.1810701 | -0.403625685 | 0.03542  |
| STARD4     | 0.276804507  | 0.0669384 | 0.054604676  | 0.7177184 | 0.31749336   | 0.035453 |
| ST3GAL6    | -0.649566273 | 0.0530085 | 0.053811841  | 0.870569  | -0.709288977 | 0.035474 |
| EMG1       | -0.164914635 | 0.2193885 | 0.165108486  | 0.2149619 | 0.27999413   | 0.03554  |
| ANKRD11    | 0.172091425  | 0.1196896 | 0.092235156  | 0.4029189 | 0.232048313  | 0.035554 |
| MIEF2      | -0.350981455 | 0.0939584 | -0.212180989 | 0.3066746 | -0.445022867 | 0.035597 |
| PPFIA2     | 0.386750375  | 0.3275412 | 0.088785127  | 0.8264143 | 0.832215346  | 0.035606 |
| PYCARD     | 0.07562077   | 0.7601973 | -0.043549654 | 0.8589229 | 0.501885721  | 0.035638 |
| ROPN1B     | -1.584698523 | 0.1011804 | -0.164253132 | 0.8451303 | -2.11110532  | 0.035655 |
| SLITRK3    | 0.28837116   | 0.5225304 | 0.314063096  | 0.4753309 | -1.010590073 | 0.035619 |
| NIPSNAP1   | -0.169135581 | 0.1353815 | -0.071608653 | 0.5256667 | -0.237655975 | 0.035694 |
| PLEKHG4B   | -0.483956939 | 0.3039112 | 0.273921279  | 0.5540311 | -0.989541354 | 0.035707 |
| ZBTB45P1   | -0.691357043 | 0.3220183 | -1.096111949 | 0.117841  | -1.493719488 | 0.035717 |
| RPL13AP3   | 0.282973572  | 0.6945725 | 0.810450415  | 0.2221132 | 1.36518999   | 0.035729 |
| DEPDC5     | 0.170829214  | 0.4188603 | 0.169459357  | 0.4203417 | -0.444804486 | 0.035811 |
| LIN28B     | -0.363027279 | 0.2830653 | 0.003078556  | 0.992725  | -0.710277804 | 0.035837 |
| NOC3L      | 0.089215997  | 0.3776595 | 0.126829787  | 0.2064337 | 0.210403191  | 0.035854 |
| CASR       | 0.64756544   | 0.2745204 | 0.601033794  | 0.3036501 | 1.21968755   | 0.035936 |
| COL21A1    | 0.601730773  | 0.4819616 | -0.604793998 | 0.4807914 | 1.791772802  | 0.035924 |
| GRIA4      | -0.261080267 | 0.4728363 | 0.49309227   | 0.1729073 | -0.765754281 | 0.035967 |
| CD9        | 0.035496104  | 0.895699  | 0.30963707   | 0.2517947 | 0.565911228  | 0.036118 |
| CRIP1      | 0.033541589  | 0.9139747 | -0.269465215 | 0.3874664 | 0.638013835  | 0.03613  |
| SPTBN4     | 0.390609348  | 0.6373834 | 0.887618553  | 0.2669789 | -1.890665497 | 0.036244 |
| AC079753.4 | 0.596266187  | 0.3872015 | 0.986897538  | 0.1410828 | 1.389923382  | 0.03626  |
| TOMM6      | 0.129796618  | 0.2473779 | 0.170099985  | 0.1276749 | 0.233844321  | 0.036342 |
| GPA33      | -0.301896686 | 0.6465618 | -0.28199843  | 0.6683089 | -1.379191552 | 0.036446 |
| SLC6A20    | 0.013443983  | 0.9804046 | 0.398323012  | 0.4633655 | -1.164306278 | 0.036437 |
| MYL1       | -0.802235803 | 0.7476386 | -3.913717249 | 0.1380275 | -5.585347266 | 0.03648  |
| IFI44L     | 0.5471115951 | 0.1723557 | 0.121327261  | 0.7635298 | 0.836167461  | 0.03652  |
| SBK1       | 0.058183768  | 0.8040992 | -0.28704315  | 0.2240488 | -0.504222985 | 0.036554 |
| CTNND1     | 0.111216634  | 0.2421632 | -0.075847615 | 0.4253573 | 0.198687653  | 0.036584 |
| LAMP5      | 1.125444854  | 0.2240259 | -0.102449501 | 0.9128897 | 1.925175529  | 0.036602 |
| SSBP3      | 0.195179044  | 0.234468  | 0.251208303  | 0.1250674 | 0.341528375  | 0.036597 |
| CPT1B      | -0.155057154 | 0.4602326 | -0.398907501 | 0.0576352 | -0.438210904 | 0.036667 |
| GKAP1      | -0.157995349 | 0.4673365 | -0.317205514 | 0.1322417 | -0.458131566 | 0.036679 |
| DPYD       | 0.399216054  | 0.0820749 | 0.364893894  | 0.1109098 | 0.478137339  | 0.036735 |
| VIPR1      | -0.545755869 | 0.313601  | 0.24369844   | 0.6507464 | -1.139649108 | 0.036728 |
| HES4       | 0.430378407  | 0.2664451 | 0.532341795  | 0.1589972 | 0.784624985  | 0.03677  |
| SH3GL2     | -0.161476817 | 0.7617878 | -0.574876013 | 0.2853831 | -1.184333195 | 0.036783 |
| PRDX5      | 0.076132657  | 0.5046215 | -0.00230382  | 0.9838578 | 0.237339883  | 0.036805 |
| ZNF142     | 0.117010409  | 0.560455  | -0.119349397 | 0.5527174 | -0.420574226 | 0.036904 |
| CAMK2N1    | -0.329053213 | 0.2560954 | -0.108265981 | 0.7079991 | -0.605240424 | 0.03693  |
| PCP4L1     | -0.698979147 | 0.2191106 | 0.306996716  | 0.567308  | -1.219841019 | 0.037015 |
| SLC39A11   | -0.0730609   | 0.4950457 | -0.084584405 | 0.4275922 | 0.21907807   | 0.037033 |
| HSPA9      | 0.135107523  | 0.3834572 | 0.240353238  | 0.12084   | 0.323042522  | 0.037082 |

|            |              |           |              |           |              |          |
|------------|--------------|-----------|--------------|-----------|--------------|----------|
| POLA2      | 0.223723236  | 0.1897174 | 0.023780906  | 0.888702  | 0.353230134  | 0.037108 |
| TTC18      | -0.39661255  | 0.1741141 | -0.279534233 | 0.3251902 | -0.60559235  | 0.037112 |
| FBXO11     | 0.046011092  | 0.6598441 | 0.13021717   | 0.210584  | 0.216700254  | 0.037162 |
| KIAA1467   | 0.249283583  | 0.2272145 | -0.006757387 | 0.9740039 | -0.447139481 | 0.037236 |
| ADCK1      | -0.281951502 | 0.1892723 | 0.195247294  | 0.3425469 | -0.44045902  | 0.037268 |
| ANO10      | 0.065965182  | 0.6705847 | 0.053993264  | 0.7258776 | 0.320050883  | 0.037356 |
| CIR1       | -0.188525307 | 0.118772  | -0.147702431 | 0.2179694 | -0.250612937 | 0.037366 |
| LAT        | 0.046295776  | 0.8789331 | -0.327457372 | 0.2812631 | -0.648799436 | 0.037364 |
| SRPX2      | 0.164912128  | 0.5586321 | 0.341913732  | 0.2229574 | 0.583197143  | 0.03736  |
| NR3C1      | 0.265882289  | 0.1944537 | -0.045305487 | 0.8249675 | 0.42555954   | 0.037419 |
| SLC3A1     | -0.227176805 | 0.5519925 | 0.421453908  | 0.2660889 | -0.799397005 | 0.037418 |
| TGFBR1     | 0.194033172  | 0.142324  | 0.220675247  | 0.0941768 | 0.274641325  | 0.037424 |
| HNF4A      | -0.148434606 | 0.6307018 | -0.244498304 | 0.4277335 | -0.644983622 | 0.037442 |
| SPOCK2     | -0.4347813   | 0.5092854 | -0.332393328 | 0.6137959 | -1.371607648 | 0.037468 |
| B4GALNT3   | 0.180000482  | 0.4301747 | -0.099520776 | 0.6633264 | 0.471921355  | 0.037569 |
| BEGAIN     | 0.860391735  | 0.1750797 | 0.848753221  | 0.1770744 | 1.310866454  | 0.037555 |
| GPATCH3    | -0.302605791 | 0.2046665 | -0.29834971  | 0.2079307 | -0.498490706 | 0.03757  |
| PLAC9      | 0.041143462  | 0.9276955 | -0.112298531 | 0.803973  | 0.905417766  | 0.037593 |
| RPSAP9     | -0.219461516 | 0.8198722 | -1.008584032 | 0.3061983 | -2.257201133 | 0.037657 |
| P11-122G1E | 0.946524628  | 0.53922   | 2.348942052  | 0.1173522 | 3.10216479   | 0.037686 |
| P11-454L1  | -0.458412976 | 0.3341831 | -0.389308463 | 0.4005796 | -1.028971672 | 0.037696 |
| SHBG       | 0.297663018  | 0.6283078 | 1.081536928  | 0.0695497 | -1.544642055 | 0.037785 |
| TRIM23     | -0.386846414 | 0.0699202 | -0.084070623 | 0.6908998 | -0.441979232 | 0.037872 |
| ZNF691     | -0.203327458 | 0.3833347 | -0.269547478 | 0.2448033 | -0.488246446 | 0.037865 |
| POLR2B     | -0.081183602 | 0.3247358 | -0.002805612 | 0.9727621 | 0.170514229  | 0.037906 |
| CSRP1      | 0.253557133  | 0.1541652 | 0.207460546  | 0.2434493 | 0.368868427  | 0.038054 |
| SLC25A1P5  | -0.302630148 | 0.4745434 | -0.584787363 | 0.1698024 | -0.947197456 | 0.03808  |
| GNL3       | 0.101128592  | 0.3993054 | 0.04070957   | 0.7341437 | 0.248284057  | 0.038181 |
| WDHD1      | -0.274511231 | 0.0815019 | -0.232100408 | 0.1389574 | -0.326257631 | 0.038254 |
| SLC35B3    | 0.150856298  | 0.1787828 | 0.037383267  | 0.7373733 | 0.229866484  | 0.038314 |
| P11-356M2C | -0.190002612 | 0.7534537 | -0.436230507 | 0.4711685 | -1.400556391 | 0.038345 |
| HERC2P9    | -0.336125955 | 0.1144744 | -0.155446789 | 0.463416  | -0.440244099 | 0.038418 |
| EHBP1L1    | 0.291049934  | 0.0767772 | 0.118773125  | 0.468613  | 0.339038209  | 0.038465 |
| CLIP3      | 0.408489463  | 0.2008006 | 0.020085692  | 0.9499982 | -0.676730009 | 0.038596 |
| EIF2B5     | -0.187849758 | 0.1258676 | -0.132450801 | 0.2790404 | -0.253211503 | 0.038598 |
| NUTM2D     | 0.097041902  | 0.6782891 | -0.248068801 | 0.2904609 | -0.491307463 | 0.038636 |
| ELOVL4     | -0.019733662 | 0.9393036 | -0.027842963 | 0.9138225 | -0.54319967  | 0.038852 |
| ST6GAL1    | -0.123814307 | 0.7045905 | 0.367639642  | 0.2570931 | -0.679262176 | 0.03885  |
| BAZ2A      | 0.059329106  | 0.7195439 | 0.027270427  | 0.8689642 | -0.341957898 | 0.038866 |
| ALG5       | -0.177671874 | 0.0924094 | -0.003291367 | 0.9747471 | 0.21383174   | 0.03896  |
| MRPS18A    | 0.181757613  | 0.1226247 | 0.030416947  | 0.7957909 | 0.241889355  | 0.039054 |
| NUDT4      | -0.203195168 | 0.0757685 | -0.202496659 | 0.0763293 | -0.235965846 | 0.039041 |
| TFPI       | 0.156246878  | 0.2869969 | 0.132100121  | 0.3677678 | 0.302704597  | 0.03904  |
| NEURL1     | -0.315747392 | 0.3300616 | 0.094607748  | 0.7688503 | -0.682524528 | 0.039212 |
| SULT1A1    | -0.256012781 | 0.5261999 | -0.026938664 | 0.9465232 | -0.835035578 | 0.039216 |
| CCDC144NI  | -0.049859867 | 0.9167937 | -0.186611637 | 0.689594  | -1.022023714 | 0.039253 |
| CTPS1      | 0.058695884  | 0.7358684 | 0.162650025  | 0.3487204 | 0.357283299  | 0.03929  |

|            |              |           |              |           |              |          |
|------------|--------------|-----------|--------------|-----------|--------------|----------|
| SERPINB2   | -0.193262873 | 0.8053326 | 0.78507761   | 0.3134371 | 1.602693761  | 0.039279 |
| SEL1L3     | 0.107495817  | 0.5641875 | 0.07473289   | 0.688411  | 0.38375867   | 0.039338 |
| GNAI3      | 0.06714697   | 0.2700013 | 0.084890144  | 0.1610207 | 0.124836896  | 0.039489 |
| CDH17      | -0.595750022 | 0.2851053 | -0.17927015  | 0.7477008 | -1.147394961 | 0.039537 |
| CPA6       | 0.168904739  | 0.779276  | 1.018618942  | 0.0702918 | 1.151455979  | 0.039609 |
| RLIM       | 0.030219922  | 0.6829277 | 0.060014813  | 0.4154186 | 0.151727201  | 0.039603 |
| CEP63      | 0.019826361  | 0.9015512 | 0.022307931  | 0.8891112 | 0.327988271  | 0.039647 |
| IFT27      | -0.360918889 | 0.0800983 | -0.249758298 | 0.2225701 | -0.424407653 | 0.039692 |
| UEVLD      | -0.034699489 | 0.7391768 | 0.152711253  | 0.1379298 | 0.211762825  | 0.039699 |
| P11-480I12 | -0.303386372 | 0.5466408 | -0.334851925 | 0.4983548 | -1.111956176 | 0.039733 |
| GPR125     | 0.094283619  | 0.4295704 | 0.215136936  | 0.0704553 | 0.244618733  | 0.039874 |
| EMBP1      | -0.19472703  | 0.7580134 | 0.809943884  | 0.1690892 | 1.197772696  | 0.039923 |
| LAD1       | 0.146998142  | 0.3714698 | 0.144980914  | 0.3780307 | 0.337720921  | 0.03993  |
| C12orf5    | -0.358041154 | 0.0843701 | -0.39162844  | 0.0585641 | -0.426894441 | 0.039953 |
| P11-175I17 | -0.290533398 | 0.0647296 | 0.066940489  | 0.6600967 | -0.32027568  | 0.040054 |
| ERP27      | -0.380970346 | 0.2881101 | 0.144993287  | 0.6835541 | -0.739220585 | 0.040092 |
| TAS2R64P   | -0.226137905 | 0.54902   | -0.207888602 | 0.5730929 | -0.798875558 | 0.040117 |
| MICA       | -0.028018185 | 0.8477769 | 0.173951326  | 0.2276695 | 0.296082731  | 0.040132 |
| ACTN2      | -0.401506139 | 0.6057871 | 0.234239789  | 0.7570612 | -1.662161485 | 0.040178 |
| CLEC3B     | 1.1317232    | 0.2707821 | -0.005344487 | 0.9959416 | 2.071928415  | 0.04025  |
| TTC38      | -0.263573788 | 0.1034255 | -0.018254103 | 0.9096673 | -0.332567396 | 0.04025  |
| FKBP7      | -0.041986592 | 0.8241791 | 0.014486449  | 0.9385049 | -0.388858181 | 0.040278 |
| ECM2       | 0.1074358    | 0.8260557 | 0.721446754  | 0.1274148 | 0.968451758  | 0.040379 |
| SLC35G2    | 0.571648167  | 0.1289032 | 0.18801728   | 0.6229966 | 0.751276706  | 0.040361 |
| SMYD5      | -0.044527385 | 0.8219069 | -0.26485851  | 0.1792758 | -0.405522387 | 0.040389 |
| YAP1       | 0.079017236  | 0.3418499 | 0.145613975  | 0.07851   | -0.170263932 | 0.040493 |
| MGAT4A     | -0.306468813 | 0.286257  | -0.032339605 | 0.9102667 | -0.589410675 | 0.040514 |
| NEURL4     | -0.184059961 | 0.297985  | -0.336820684 | 0.055521  | -0.361948619 | 0.040532 |
| FAM109B    | 0.193590341  | 0.6548351 | -0.281901735 | 0.5226831 | 0.846796061  | 0.040584 |
| P11-345J13 | -0.950367719 | 0.08548   | -0.312135552 | 0.5422518 | -1.137855347 | 0.040583 |
| HOXB4      | 0.112221456  | 0.6862492 | 0.148563442  | 0.5894024 | -0.582510852 | 0.040636 |
| SIK3       | 0.11427406   | 0.4674124 | -0.175948851 | 0.2627027 | -0.322592839 | 0.040667 |
| PBXIP1     | -0.121848552 | 0.4694133 | -0.209632015 | 0.2126439 | -0.344946391 | 0.040686 |
| SYNCRIP    | -0.012523624 | 0.91312   | 0.113721267  | 0.3212003 | 0.234494246  | 0.040758 |
| EPB41L5    | 0.235355624  | 0.0948833 | 0.051176377  | 0.7163333 | 0.287883919  | 0.040783 |
| ATP5L      | 0.181774253  | 0.0667155 | 0.031299112  | 0.7517412 | 0.202213998  | 0.040905 |
| LRRC3B     | 1.016046046  | 0.1943117 | 1.072415875  | 0.1679789 | 1.562138826  | 0.040943 |
| SRBD1      | -0.146011822 | 0.2052425 | 0.123287333  | 0.2749701 | 0.231439952  | 0.040963 |
| CDHR2      | 0.00768565   | 0.9923263 | 0.651175685  | 0.4146587 | -1.646047372 | 0.041053 |
| FANCC      | -0.168597737 | 0.4011693 | -0.193918289 | 0.3308598 | -0.40909734  | 0.041051 |
| GALNT12    | -0.078725818 | 0.6560925 | -0.130974268 | 0.4577699 | 0.359061727  | 0.041002 |
| PUM1       | 0.114978728  | 0.0633553 | -0.009469645 | 0.877939  | 0.126052039  | 0.041043 |
| TRMT1L     | 0.10269117   | 0.5799881 | 0.018092019  | 0.921674  | -0.380121126 | 0.041016 |
| FRMPD1     | 0.093308131  | 0.9055092 | 0.419225198  | 0.5865536 | -1.651798182 | 0.041228 |
| UBE2E1     | 0.036578827  | 0.7233427 | 0.02104225   | 0.8381335 | 0.210137981  | 0.041234 |
| COX7B      | -0.060903954 | 0.5552035 | 0.150924602  | 0.1415596 | 0.209598621  | 0.041337 |
| C20orf144  | 0.287540561  | 0.4340025 | 0.230018418  | 0.5249135 | -0.842381371 | 0.041532 |

|           |              |           |              |           |              |          |
|-----------|--------------|-----------|--------------|-----------|--------------|----------|
| PCDH10    | 0.056919849  | 0.87925   | 0.309939325  | 0.4067873 | -0.770709299 | 0.041524 |
| SHH       | 0.243912553  | 0.1370042 | 0.024057327  | 0.8833004 | 0.333500261  | 0.041552 |
| C7orf50   | 0.104015257  | 0.5636893 | 0.142998658  | 0.4227329 | 0.363592218  | 0.041667 |
| GTF2F1    | -0.143882452 | 0.1972445 | -0.069768475 | 0.5308392 | -0.227075523 | 0.041666 |
| IMPAD1    | 0.145525793  | 0.389692  | 0.078162486  | 0.6440364 | 0.344446085  | 0.041702 |
| BDNF      | 0.156787515  | 0.6173567 | -0.380176647 | 0.2277207 | -0.646354933 | 0.041808 |
| FAM149A   | 0.042001099  | 0.8244799 | -0.223105756 | 0.2376824 | 0.379626009  | 0.041869 |
| MUS81     | -0.232244761 | 0.0729894 | -0.124218612 | 0.3349656 | -0.263625817 | 0.041876 |
| SOS2      | 0.077131315  | 0.4345211 | 0.074690857  | 0.4467235 | 0.199715167  | 0.041896 |
| GNRH2     | -0.946066802 | 0.2525185 | -1.375352274 | 0.1039044 | -1.766391788 | 0.041925 |
| TFIP11    | -0.061865193 | 0.6682907 | -0.154479259 | 0.2842285 | -0.293486599 | 0.04192  |
| DGKI      | 0.277053383  | 0.510043  | -0.059206482 | 0.8880193 | -0.863804432 | 0.041951 |
| TACC1     | -0.318726844 | 0.0833261 | -0.284395839 | 0.1219953 | -0.374378959 | 0.041953 |
| ARID3A    | -0.121463324 | 0.5627113 | -0.318620056 | 0.1288636 | -0.426875369 | 0.041983 |
| PPT2      | -0.314672064 | 0.0829542 | -0.287483311 | 0.1136803 | -0.372839656 | 0.042038 |
| ALOX15B   | 0.029137872  | 0.9491727 | -0.365775133 | 0.4263336 | -0.9607663   | 0.042066 |
| MTCH2     | 0.028280641  | 0.8463814 | 0.170748536  | 0.2401249 | 0.295438628  | 0.04224  |
| USP40     | -0.260313194 | 0.0697551 | -0.154777814 | 0.279725  | -0.291125099 | 0.042269 |
| MTHFS     | -0.114690077 | 0.5438157 | -0.338321925 | 0.0731476 | 0.377624874  | 0.042355 |
| SEPP1     | -0.310484175 | 0.4994097 | 0.82545639   | 0.0723761 | -0.933617203 | 0.042351 |
| HDAC6     | -0.121091717 | 0.2758183 | -0.145294855 | 0.1901551 | -0.225436114 | 0.042386 |
| PLN       | -0.390973603 | 0.2694595 | -0.416375233 | 0.2337816 | -0.727537957 | 0.042494 |
| CHMP4A    | -0.24253439  | 0.1721691 | -0.196602551 | 0.2641487 | -0.359876373 | 0.042515 |
| DNAJC2    | 0.072702943  | 0.5080529 | 0.162847646  | 0.1358651 | 0.221685444  | 0.042522 |
| ATP13A1   | -0.036224017 | 0.8147507 | -0.163426223 | 0.2899908 | -0.313315126 | 0.042806 |
| TMEM139   | 0.385646308  | 0.0749214 | -0.079200537 | 0.7165328 | -0.445566155 | 0.042804 |
| GJB4      | 0.771055947  | 0.3421984 | 0.992771854  | 0.2132165 | 1.591630642  | 0.042933 |
| ISOC1     | 0.078125775  | 0.413799  | -0.128817533 | 0.1773999 | 0.192133338  | 0.042921 |
| POMT1     | -0.060376921 | 0.7559284 | -0.270918    | 0.1613923 | -0.3939971   | 0.042909 |
| ENTHD2    | 0.183201611  | 0.4030987 | -0.295239692 | 0.1789425 | -0.450941897 | 0.04296  |
| GEN1      | -0.137228914 | 0.4443922 | -0.289535979 | 0.1055299 | -0.362417617 | 0.042983 |
| NR1D1     | -0.718906461 | 0.1685016 | -1.001727337 | 0.0552643 | -1.061727595 | 0.043018 |
| RAB35     | 0.238155478  | 0.0519714 | 0.148519468  | 0.2264918 | 0.24755211   | 0.043027 |
| LEMD3     | -0.196039966 | 0.1402974 | -0.099445886 | 0.4533553 | -0.268875521 | 0.043053 |
| ARSD      | 0.120248364  | 0.3213308 | 0.058187206  | 0.6306439 | 0.244219847  | 0.043086 |
| ACO1      | 0.113696828  | 0.2765726 | 0.01409215   | 0.8925384 | 0.21065729   | 0.043209 |
| HECTD1    | -0.133361882 | 0.1083013 | 0.141120959  | 0.0878835 | 0.167175378  | 0.043191 |
| SLC2A8    | -0.161805867 | 0.4377126 | -0.394333077 | 0.0576274 | -0.420195853 | 0.04325  |
| AMPD2     | 0.131270051  | 0.2906293 | -0.110381301 | 0.3736782 | -0.251449433 | 0.043462 |
| IARS      | 0.037849944  | 0.6902418 | 0.074214644  | 0.4336953 | 0.191364161  | 0.04349  |
| COQ10B    | 0.26609177   | 0.0720873 | 0.097862737  | 0.5082377 | 0.297767492  | 0.04368  |
| ZNF793    | -0.226981752 | 0.1473218 | -0.156165092 | 0.3131989 | -0.316192282 | 0.043694 |
| IMPACT    | 0.038209466  | 0.7596034 | 0.235813871  | 0.0568283 | 0.250139835  | 0.043743 |
| UGT2B17   | 0.025381678  | 0.9763374 | 0.988369831  | 0.2446476 | -1.77242293  | 0.043731 |
| ACSBG2    | -0.328303872 | 0.6930832 | 0.335748589  | 0.659668  | -1.839795908 | 0.043854 |
| TMPRSS11E | -1.003993968 | 0.466967  | 1.798496117  | 0.1319764 | 2.407085513  | 0.043886 |
| SENP3     | 0.136045889  | 0.2773321 | 0.212542929  | 0.0876129 | 0.251053747  | 0.043911 |

|            |              |           |              |           |              |          |
|------------|--------------|-----------|--------------|-----------|--------------|----------|
| PTMA       | 0.061426533  | 0.5573088 | 0.153111643  | 0.1433956 | 0.21080641   | 0.043948 |
| TBCK       | -0.0374924   | 0.8262648 | -0.072884724 | 0.6687393 | -0.344598174 | 0.043952 |
| REPS2      | 0.297546814  | 0.2248787 | -0.076375396 | 0.7558525 | 0.491693534  | 0.043983 |
| C1D        | 0.218853992  | 0.2967924 | 0.360846309  | 0.0842122 | 0.421026987  | 0.044051 |
| RLTPR      | -0.367457395 | 0.4022524 | 0.055387871  | 0.8993115 | -0.94107277  | 0.044065 |
| ACTR3      | 0.064984523  | 0.4585657 | 0.059995011  | 0.4930182 | 0.176156468  | 0.044104 |
| ATP5C1     | 0.040799923  | 0.7366051 | 0.186413389  | 0.123534  | 0.243660484  | 0.044126 |
| ITGB1      | 0.043664397  | 0.7204237 | 0.191272207  | 0.1167834 | 0.245383786  | 0.04421  |
| CYP39A1    | -0.414827102 | 0.1531079 | 0.479462153  | 0.0845667 | -0.588577976 | 0.044554 |
| ADAMTS8    | 0.299882183  | 0.5156618 | 0.166241275  | 0.7182509 | 0.916573159  | 0.044663 |
| ANXA9      | -0.150769613 | 0.5970298 | -0.151956248 | 0.5919355 | -0.577332068 | 0.044705 |
| LRRC37A2   | -0.053737552 | 0.6146061 | -0.016084926 | 0.8778591 | -0.214727607 | 0.044766 |
| TMEM116    | 0.090434655  | 0.5745515 | -0.076382842 | 0.6320708 | -0.32745356  | 0.044816 |
| ZDHHC14    | -0.19253935  | 0.329563  | 0.089357648  | 0.6448618 | 0.387405125  | 0.044822 |
| GALE       | 0.201521119  | 0.1335029 | -0.196214123 | 0.1447364 | 0.268708693  | 0.044872 |
| HINT1      | 0.087971687  | 0.2892876 | 0.103112552  | 0.2126408 | 0.166013129  | 0.04492  |
| C1QTNF2    | -0.033335961 | 0.9294515 | 0.585117409  | 0.0945026 | 0.70046914   | 0.04506  |
| EIF3M      | -0.032842607 | 0.7433832 | 0.169226059  | 0.0907555 | 0.200610638  | 0.045026 |
| NRIP2      | -0.03545089  | 0.8941737 | 0.129030323  | 0.6218184 | -0.546972098 | 0.045054 |
| RP11-2J18. | -1.100899614 | 0.0930878 | -0.767074438 | 0.2052081 | -1.33512876  | 0.045011 |
| C18orf21   | -0.116832929 | 0.4064854 | -0.180937133 | 0.1968827 | -0.283123445 | 0.045074 |
| POLR3GL    | -0.201175497 | 0.139198  | -0.23051707  | 0.086958  | -0.27097488  | 0.045088 |
| ITIH4      | -0.385033563 | 0.4010646 | -0.455223923 | 0.3212864 | -0.949191199 | 0.045128 |
| DNAH1      | -0.257532824 | 0.3608976 | -0.081437534 | 0.7726168 | -0.566478997 | 0.045273 |
| MOCS3      | 0.018330791  | 0.8582045 | -0.076931599 | 0.4483926 | -0.206940084 | 0.045235 |
| SIX4       | 0.011798652  | 0.9659892 | -0.079456959 | 0.7736105 | 0.550824252  | 0.045261 |
| SPTLC3     | -0.372980954 | 0.1594186 | -0.27248834  | 0.3013143 | -0.530030119 | 0.045386 |
| C20orf24   | -0.001444949 | 0.9911943 | 0.127511333  | 0.3261082 | 0.259544877  | 0.045424 |
| PCDHGB6    | 0.14793906   | 0.4369504 | 0.088838963  | 0.6392299 | -0.384835042 | 0.045488 |
| ZBTB12     | -0.378531763 | 0.27644   | -0.514595345 | 0.1374931 | -0.700521483 | 0.045554 |
| PDK3       | 0.164972258  | 0.2856292 | -0.101816097 | 0.5102934 | -0.312295263 | 0.045623 |
| PDZK1      | -0.546829726 | 0.2993625 | -0.108100515 | 0.8368489 | -1.05365902  | 0.045752 |
| GAREML     | 0.548148627  | 0.1531095 | 0.718357951  | 0.0604307 | 0.767213687  | 0.045888 |
| LEF1       | 0.183338149  | 0.753688  | 0.460289147  | 0.4295592 | 1.15761679   | 0.045869 |
| PHF11      | 0.055027957  | 0.8069829 | 0.34511142   | 0.1204637 | 0.443057749  | 0.045869 |
| ZNF284     | -0.158823742 | 0.2902231 | -0.124023482 | 0.3970222 | -0.299887331 | 0.045911 |
| ASS1       | 0.526647984  | 0.1267976 | 0.330454099  | 0.3379057 | 0.686966625  | 0.045994 |
| P2RY1      | 0.090376397  | 0.6811863 | -0.196513598 | 0.3718074 | -0.440017161 | 0.046025 |
| CTR9       | -0.12243049  | 0.2918955 | -0.072292221 | 0.5336414 | -0.232307971 | 0.04615  |
| ATP6AP2    | 0.058780908  | 0.5626756 | 0.052150422  | 0.6065276 | 0.20146879   | 0.046422 |
| SUSD1      | 0.20018479   | 0.0752983 | 0.112512807  | 0.3164506 | 0.223415584  | 0.046453 |
| TYMS       | -0.035462127 | 0.8372922 | -0.192229559 | 0.2648412 | -0.344111703 | 0.046429 |
| SELT       | -0.005923975 | 0.9670281 | 0.186615079  | 0.1916698 | 0.284533914  | 0.046547 |
| PPP4R1L    | -0.02139331  | 0.9279967 | 0.372778416  | 0.110662  | 0.464880961  | 0.046611 |
| WDR43      | 0.114887026  | 0.5101666 | 0.144996371  | 0.4056191 | 0.3468991    | 0.046606 |
| NUDT16P1   | -0.360927187 | 0.1829849 | -0.236261729 | 0.3670722 | -0.539916911 | 0.046696 |
| RARA       | -0.269287189 | 0.0902011 | -0.172204595 | 0.2777884 | -0.316182382 | 0.046685 |

|            |              |           |              |           |              |          |
|------------|--------------|-----------|--------------|-----------|--------------|----------|
| PPIF       | -0.002318697 | 0.9881265 | 0.088457743  | 0.5689898 | 0.30836011   | 0.04677  |
| FAM63A     | -0.181493745 | 0.4123855 | -0.283091155 | 0.1997344 | -0.440226495 | 0.046873 |
| RPS3AP47   | 0.475756437  | 0.4650865 | 0.152167053  | 0.8169014 | 1.20673403   | 0.046881 |
| CASP2      | -0.012478089 | 0.9437253 | -0.292860216 | 0.0979878 | -0.351927043 | 0.047048 |
| H2AFJ      | 0.113021894  | 0.5297804 | 0.01286679   | 0.9428516 | 0.355475136  | 0.046934 |
| PRADC1     | 0.086753171  | 0.6104787 | 0.128317607  | 0.4426747 | 0.330253192  | 0.047016 |
| RASSF6     | 0.224387865  | 0.2092748 | -0.022410566 | 0.9002159 | 0.354402394  | 0.047048 |
| UNC13B     | 0.199625046  | 0.1689628 | -0.088065467 | 0.5441075 | 0.28763545   | 0.047144 |
| SERPINH1   | -0.131277596 | 0.3386558 | -0.143996776 | 0.2937436 | -0.272317285 | 0.047193 |
| EGLN1      | 0.012765312  | 0.9218642 | 0.214907834  | 0.096741  | 0.256927232  | 0.047211 |
| TRRAP      | -0.060941926 | 0.734789  | -0.262425533 | 0.1444696 | -0.356950584 | 0.047386 |
| DYNLL2     | -0.119299352 | 0.2814889 | -0.141841026 | 0.1986167 | -0.219380393 | 0.047469 |
| PBX2       | 0.077725701  | 0.334819  | -0.145177963 | 0.071221  | -0.15984814  | 0.047516 |
| C1orf63    | -0.240329482 | 0.1174737 | -0.130423312 | 0.3938024 | -0.304483713 | 0.047558 |
| ERGIC3     | 0.063688132  | 0.6144357 | 0.075771613  | 0.5485314 | 0.250121177  | 0.047598 |
| MAMDC2     | -0.31168797  | 0.6054594 | 0.710775938  | 0.2086221 | 1.111985682  | 0.047571 |
| P11-203L2. | 0.668721737  | 0.3229089 | 1.009798753  | 0.1185122 | 1.26856535   | 0.047579 |
| SLC4A4     | 0.065405723  | 0.7289866 | 0.192548715  | 0.3072356 | 0.373479912  | 0.047588 |
| CCDC127    | -0.262165125 | 0.1168252 | -0.129463342 | 0.4348269 | -0.329978536 | 0.047712 |
| PIGT       | 0.291846279  | 0.0585735 | 0.205306997  | 0.1829635 | 0.305214814  | 0.047731 |
| ERMARD     | -0.286661823 | 0.1747273 | 0.066354898  | 0.7465002 | -0.415165199 | 0.047777 |
| WDR37      | -0.125230656 | 0.3241994 | -0.225574873 | 0.0762739 | -0.252734023 | 0.04778  |
| PRKG2      | -0.345516154 | 0.3006017 | -0.192383266 | 0.5590643 | -0.667767403 | 0.047806 |
| RP9        | -0.130890562 | 0.3004258 | -0.127663576 | 0.3041976 | -0.249985912 | 0.047859 |
| RDH5       | -0.446236487 | 0.1248519 | 0.003456795  | 0.9903809 | -0.579344951 | 0.0479   |
| B4GALT2    | 0.077301073  | 0.4442635 | 0.175854376  | 0.0791041 | 0.198321336  | 0.048095 |
| GPN3       | -0.210581038 | 0.2391604 | -0.084895441 | 0.6297247 | -0.351130615 | 0.048239 |
| PCK1       | 0.335104771  | 0.6237547 | 0.953384673  | 0.1590095 | -1.396799995 | 0.04822  |
| TSTA3      | 0.099474156  | 0.4618101 | 0.052783289  | 0.6949708 | 0.265819935  | 0.048233 |
| CHST12     | -0.178470364 | 0.2950317 | 0.009625704  | 0.9542309 | -0.336854794 | 0.048271 |
| DKK3       | -0.13715724  | 0.5090277 | 0.079639165  | 0.6970658 | 0.402696892  | 0.04838  |
| HSBP1      | 0.006225025  | 0.9366831 | 0.014762919  | 0.8497886 | 0.153900407  | 0.048358 |
| PEX5       | -0.140720113 | 0.3271159 | -0.148980911 | 0.2972634 | -0.283713738 | 0.048397 |
| SLIT3      | 0.587473076  | 0.0831145 | 0.564830173  | 0.0951688 | 0.668967754  | 0.048386 |
| SYT7       | -0.138353129 | 0.6839308 | -0.496072805 | 0.1449499 | -0.678875454 | 0.048366 |
| VPS26A     | 0.201738772  | 0.0939427 | 0.127245168  | 0.2893395 | 0.23694303   | 0.048315 |
| DUOX2      | 0.764644851  | 0.1052272 | 0.778708889  | 0.0989285 | 0.930538412  | 0.048639 |
| KCNG3      | 0.819039685  | 0.3516148 | 1.030294659  | 0.2299992 | 1.656663131  | 0.048646 |
| P11-174O3. | -0.59461018  | 0.1906198 | 0.203249473  | 0.6135998 | -0.922178149 | 0.048696 |
| CAPN15     | -0.16986763  | 0.2237752 | -0.178768277 | 0.2008913 | -0.275346325 | 0.048769 |
| EPDR1      | 0.414123826  | 0.5265379 | 1.176910827  | 0.0588386 | 1.208199005  | 0.048793 |
| CCDC41     | 0.080614945  | 0.631554  | 0.25370557   | 0.1259283 | 0.327504267  | 0.048834 |
| 8-Sep      | 0.098931451  | 0.3204392 | 0.092106104  | 0.3524895 | 0.195118227  | 0.048919 |
| ME2        | 0.095172806  | 0.5510633 | 0.303963151  | 0.0560793 | 0.313472338  | 0.049015 |
| PLXNB1     | -0.218726098 | 0.0807099 | -0.167867832 | 0.1798456 | -0.246483311 | 0.049047 |
| TUBB2BP1   | 2.16850546   | 0.0807732 | 1.98167448   | 0.1104948 | 2.4414528    | 0.049099 |
| MTND2P12   | 0.141636254  | 0.8307397 | 0.026418729  | 0.9679297 | -1.537797998 | 0.04913  |



|             |              |           |              |           |              |          |
|-------------|--------------|-----------|--------------|-----------|--------------|----------|
| MED6        | 0.021514522  | 0.7992263 | -0.140033232 | 0.0976368 | -0.166836787 | 0.049263 |
| CYP2C9      | 0.076003553  | 0.7573461 | 0.395834478  | 0.1049402 | 0.479488943  | 0.049358 |
| FBXO7       | 0.095353723  | 0.1675024 | -0.005659563 | 0.9343524 | 0.134945709  | 0.049489 |
| HSPA14      | 0.115885524  | 0.2316872 | 0.053187675  | 0.5811182 | 0.189092277  | 0.049497 |
| RNF216P1    | -0.077791503 | 0.5295401 | -0.003324428 | 0.9784058 | -0.243798348 | 0.049482 |
| ZFYVE20     | -0.144676687 | 0.1816812 | -0.0613639   | 0.5680837 | -0.212451027 | 0.049531 |
| GBP5        | 0.338785375  | 0.2669852 | 0.409482593  | 0.1769267 | 0.594149156  | 0.049599 |
| ZNF425      | -0.35758142  | 0.243685  | -0.328430493 | 0.2743838 | -0.599308445 | 0.049601 |
| HPGD        | -0.279332137 | 0.4441181 | -0.153791965 | 0.6734068 | 0.715595662  | 0.049729 |
| CEP78       | -0.186046241 | 0.1870624 | -0.053706101 | 0.7017613 | -0.276013819 | 0.049816 |
| EPHA7       | -0.089094745 | 0.7424852 | -0.163620213 | 0.5457845 | -0.532813151 | 0.049808 |
| VWC2        | 1.108997092  | 0.1808731 | 1.042185215  | 0.207618  | 1.614640562  | 0.049813 |
| COLEC10     | -0.491425819 | 0.2388836 | -0.526282951 | 0.206815  | -0.819129917 | 0.049844 |
| RAB11FIP3   | -0.045223208 | 0.8478283 | -0.303380724 | 0.1968065 | -0.46520166  | 0.049911 |
| FAM83B      | 0.23534337   | 0.2239416 | 0.273863732  | 0.15617   | 0.378521721  | 0.049984 |
| AC006195.2  | 2.630599148  | 0.0544227 | 2.626964424  | 0.051425  | 2.720182937  | 0.043755 |
| AC019181.3  | -1.047489868 | 0.2143014 | -1.257532314 | 0.1346298 | -1.990957686 | 0.039713 |
| AC024937.4  | -1.34866216  | 0.3429969 | -1.74783522  | 0.2257685 | -3.996347226 | 0.012611 |
| AC026882.1  | 1.798042708  | 0.2778071 | 2.564983635  | 0.0890284 | 3.462185087  | 0.015789 |
| ACTBP11     | 0.498830256  | 0.5958371 | 0.807580559  | 0.3635226 | 1.75217028   | 0.035951 |
| ACTBP12     | 1.292616462  | 0.2338212 | 1.746167569  | 0.092673  | 2.183738724  | 0.032583 |
| ACTBP8      | 1.353410605  | 0.3478072 | 2.323452027  | 0.0819172 | 2.791995359  | 0.033911 |
| ARPP21      | -1.964910291 | 0.1630456 | -0.884344514 | 0.5155771 | -3.850243547 | 0.014158 |
| ASB15       | -2.08476283  | 0.175676  | -0.401471791 | 0.7520592 | -3.435755948 | 0.027966 |
| C11orf16    | -0.907452794 | 0.3374286 | -0.988787876 | 0.2843833 | -2.665123708 | 0.031519 |
| C11orf42    | -0.46648207  | 0.4622801 | -1.283062398 | 0.0619862 | -1.493019293 | 0.038961 |
| C11orf53    | -0.706375942 | 0.4536617 | -0.960250326 | 0.3090398 | -3.186630496 | 0.014665 |
| C20orf202   | -0.212216921 | 0.7334995 | -0.690484042 | 0.2799843 | -1.447820291 | 0.043263 |
| CCDC54      | 1.057519433  | 0.5572977 | 2.153559811  | 0.2050679 | 3.432783041  | 0.030163 |
| CER1        | -0.55931266  | 0.4618771 | -0.216750731 | 0.7654185 | -2.154411694 | 0.018945 |
| CHRND       | 0.094477021  | 0.9355692 | -1.175229681 | 0.3599567 | -3.713856324 | 0.011241 |
| CRISP3      | 1.326204647  | 0.2001418 | 1.591461401  | 0.1005763 | 2.343571132  | 0.018512 |
| CTC-484M2.  | 1.563402266  | 0.182062  | 2.02553507   | 0.0706184 | 2.246061271  | 0.043681 |
| CYCSP34     | 0.233994311  | 0.7729882 | -0.448355075 | 0.5993059 | -3.050366588 | 0.012905 |
| CYLC2       | -0.71095457  | 0.6437654 | -0.594588648 | 0.6855216 | -3.243345001 | 0.04752  |
| CYP4F25P    | -2.226425116 | 0.1136711 | 0.842517442  | 0.4247148 | -3.08530344  | 0.028369 |
| DDX50P2     | -1.864035802 | 0.1004086 | -0.922748509 | 0.3559604 | -3.72984415  | 0.005576 |
| ENO1P3      | -0.74789452  | 0.4607914 | -0.195168885 | 0.8370095 | -3.378376276 | 0.010974 |
| EPHA8       | 0.457475095  | 0.6330187 | 0.240996046  | 0.8009557 | -3.032434186 | 0.014348 |
| FCGR1A      | -0.69773346  | 0.5306215 | 1.161142439  | 0.2125327 | -2.704547142 | 0.042159 |
| FCGR2C      | -2.58900466  | 0.1131947 | 0.596141727  | 0.6616822 | -3.235257495 | 0.048483 |
| FKBP6       | -0.382455114 | 0.6617622 | -0.751665451 | 0.3881736 | -3.315894327 | 0.00216  |
| FRG2C       | 0.314122694  | 0.7239451 | -0.075309726 | 0.9334954 | -3.582969525 | 0.004915 |
| GNAQP1      | 1.3577603    | 0.0947872 | 1.311562365  | 0.1028426 | -2.700268379 | 0.032115 |
| HS1-304P7.1 | 2.546949569  | 0.0574192 | 1.719824948  | 0.2136347 | 3.135162754  | 0.016385 |
| HBBP1       | -1.474667137 | 0.1622211 | -1.013478514 | 0.2991926 | -2.917611453 | 0.025783 |
| HDC         | -2.061452189 | 0.1668889 | -0.534959191 | 0.6735475 | -3.001857175 | 0.044131 |

|             |              |           |              |           |              |          |
|-------------|--------------|-----------|--------------|-----------|--------------|----------|
| HMGB2P1     | 1.182365644  | 0.3005371 | 1.325804185  | 0.2329092 | 2.431227151  | 0.021573 |
| HMGN1P30    | 0.336103057  | 0.8943979 | 1.577818015  | 0.5320495 | 4.72767798   | 0.043678 |
| INSL4       | 0.790294125  | 0.5473045 | 2.134454378  | 0.0698629 | 2.61301177   | 0.024349 |
| IP6K3       | 2.644152759  | 0.0589585 | 2.40526758   | 0.0858471 | 3.922819397  | 0.002966 |
| ITLN1       | 0.851008098  | 0.6016193 | 1.36371452   | 0.3661808 | 2.888703503  | 0.044135 |
| KLK8        | 1.839804912  | 0.2243491 | 0.769549152  | 0.6220104 | 2.963942884  | 0.046038 |
| KRTAP5-1    | 1.057530092  | 0.5576083 | 2.845790779  | 0.0795062 | 3.234000196  | 0.043125 |
| A16c-3G11.  | 0.890059746  | 0.4121165 | 1.935151496  | 0.0532408 | 2.349101765  | 0.017535 |
| LDHAP1      | -0.385161385 | 0.8215528 | 0.809229271  | 0.6339284 | 2.931127214  | 0.044788 |
| LY6D        | 1.074325694  | 0.46828   | -0.311087529 | 0.8506304 | 3.010430866  | 0.027865 |
| MBL2        | -0.767997189 | 0.6360215 | 0.215951195  | 0.8887365 | -3.596420729 | 0.045546 |
| MRPS18AP    | -0.923554511 | 0.3650433 | -0.510212409 | 0.5882593 | -3.093115888 | 0.01641  |
| MTND6P5     | 2.291772614  | 0.1687893 | 1.557241413  | 0.3727696 | 4.245067448  | 0.004352 |
| MYH4        | -1.140229026 | 0.2456592 | 0.05930522   | 0.9476734 | -2.123034292 | 0.04786  |
| NDUFB1P1    | -0.773244148 | 0.3801134 | -1.253550872 | 0.1690357 | -3.45116986  | 0.005156 |
| OR4F28P     | -2.936114538 | 0.103435  | -1.074681374 | 0.5061527 | -3.794041578 | 0.035357 |
| OR52N2      | -2.126333409 | 0.1437275 | -1.629728961 | 0.2587456 | -2.985211685 | 0.040111 |
| OR5BA1P     | 0.833152268  | 0.3099075 | 1.388256186  | 0.0693646 | 1.787607216  | 0.01704  |
| PCDH8       | 0.724737234  | 0.6086836 | 2.061898445  | 0.1078218 | 2.855100832  | 0.023669 |
| PDE6G       | -1.036053684 | 0.3160203 | -1.604266803 | 0.1472077 | -2.629969347 | 0.043062 |
| PLK5        | 1.756391174  | 0.2012654 | 1.9452286    | 0.1343671 | 3.055122645  | 0.01537  |
| PRAF2       | -1.108282563 | 0.3214095 | -1.339768102 | 0.2304634 | -2.964543597 | 0.025845 |
| QPCT        | 0.918299605  | 0.4634212 | 2.275699196  | 0.0516736 | 2.525385073  | 0.031199 |
| RAP1AP      | 1.868402404  | 0.165345  | 2.436179469  | 0.0586489 | 2.788530658  | 0.028787 |
| RHOXF2B     | 2.013705437  | 0.1936463 | 2.10608468   | 0.1641043 | 2.9194203    | 0.04517  |
| P11-107F6.  | 2.400179485  | 0.1748792 | 0.100254633  | 0.957226  | 3.482696259  | 0.035507 |
| P11-1149O2. | 0.905725477  | 0.3228219 | 1.44502035   | 0.0936305 | 1.845929726  | 0.029276 |
| P11-159H3.  | -1.912804727 | 0.1042905 | 0.116274738  | 0.8981354 | -2.594875238 | 0.046437 |
| P11-173G21  | -1.786696922 | 0.0565554 | -0.751896007 | 0.3450036 | -2.248328899 | 0.02343  |
| P11-211A18  | -1.266519317 | 0.2664612 | -0.713802316 | 0.4922368 | -3.844590113 | 0.004367 |
| P11-212F11  | -1.018709029 | 0.4197163 | -1.260399786 | 0.3184455 | -2.883109316 | 0.047501 |
| P11-253E3.  | 2.063280511  | 0.1572631 | 2.627922081  | 0.0571275 | 3.098721232  | 0.022371 |
| P11-264F23  | -0.830711828 | 0.4882306 | -0.773777395 | 0.5070322 | -3.736061863 | 0.009269 |
| P11-323D18  | -0.956123304 | 0.3964065 | -0.187906127 | 0.85173   | -2.812388841 | 0.03562  |
| P11-331G2.  | -1.149614002 | 0.2595653 | -0.542791429 | 0.5584968 | -3.366016971 | 0.009298 |
| P11-343B5.  | 0.95628516   | 0.302646  | 1.637648636  | 0.0590936 | 2.027168621  | 0.017702 |
| P11-350G24  | 0.336182623  | 0.845797  | 0.834698713  | 0.6272757 | 2.914019695  | 0.049905 |
| P11-378J18  | -0.532244054 | 0.5269393 | -1.682327267 | 0.077532  | -2.288653549 | 0.034966 |
| P11-561B11  | 0.336191507  | 0.8397955 | 2.417515346  | 0.092846  | 2.920187372  | 0.038212 |
| P11-662B19  | 1.03612125   | 0.5001047 | 2.398886409  | 0.0668545 | 2.729580234  | 0.034222 |
| P11-77K12.  | -0.835243273 | 0.4507023 | -0.388761887 | 0.7004284 | -3.455141326 | 0.009138 |
| P3-391O22   | -1.107184697 | 0.2304005 | -1.555016346 | 0.1010864 | -2.04992708  | 0.048031 |
| P5-1120P11  | 0.336174059  | 0.8474182 | 0.821609414  | 0.6381699 | 3.249963531  | 0.034122 |
| RPEP4       | -1.857139511 | 0.1261342 | 0.06656245   | 0.9373574 | -2.708552026 | 0.028233 |
| RPL21P4     | 2.741074464  | 0.0631503 | 2.14740035   | 0.1591894 | 3.234019217  | 0.021804 |
| RPL3P3      | -0.474341455 | 0.6683349 | -0.441790115 | 0.6811022 | -3.380762534 | 0.012979 |
| RPL6P7      | -1.529733736 | 0.1776695 | -1.07494694  | 0.2887247 | -2.978409543 | 0.020003 |

|          |              |           |              |           |              |          |
|----------|--------------|-----------|--------------|-----------|--------------|----------|
| RPL9P25  | 1.95642221   | 0.1624415 | 1.097941316  | 0.4533533 | 2.882789367  | 0.030947 |
| RPL9P28  | 1.777175708  | 0.299498  | 2.487966621  | 0.1144998 | 3.988550083  | 0.006513 |
| RPS4XP11 | 2.362413777  | 0.0833741 | 2.396269263  | 0.0733208 | 2.722475856  | 0.039003 |
| RWDD4P1  | -1.398054366 | 0.2071139 | -0.791894435 | 0.4437209 | -2.463936279 | 0.048035 |
| SERPINB4 | 1.290985228  | 0.3183476 | 0.840048268  | 0.5196185 | 2.510151007  | 0.040333 |
| SLC35D3  | 1.48119454   | 0.1105683 | -2.163990321 | 0.1009798 | 1.811538906  | 0.045044 |
| SPRR2E   | 3.371648321  | 0.0554647 | 0.100271176  | 0.9596593 | 3.605324126  | 0.039014 |
| SUMO2P14 | -1.36849858  | 0.1447497 | -0.050608715 | 0.9483596 | -2.849746278 | 0.019735 |
| TMEM207  | -0.142501234 | 0.8879661 | -0.423577146 | 0.6759401 | -2.378888406 | 0.046026 |
| TMEM229A | -1.353567723 | 0.1122204 | -0.396399228 | 0.6114386 | -3.812576812 | 0.002134 |

**Table S1. DEGs of STM, T3SS-1<sup>mut</sup> and T3SS-2<sup>mut</sup>-infected HIOs at 2.5h relative to PBS-injected HIOs.** Significant DEGs ( $p < 0.05$ ) in at least one infection condition are listed.
