# Supplementary material for: Salmonella enterica Serovar Typhimurium SPI-1 and SPI-2 Shape the Global Transcriptional Landscape in a Human Intestinal Organoid Model System
Source: PubMed Central journal article supplement (PMC8262845; doi:10.1128/mbio.00399-21), 2021-05-18
Supplement: mbio.00399-21-st002.pdf [file mbio.00399-21-st002.pdf]

**Table S2: Significant genes 8h pi**

| Symbol     | STM                            |          | T3SS-1 <sup>mut</sup>          |          | T3SS-2 <sup>mut</sup>          |          |
|------------|--------------------------------|----------|--------------------------------|----------|--------------------------------|----------|
|            | log <sub>2</sub> (fold change) | p-value  | log <sub>2</sub> (fold change) | p-value  | log <sub>2</sub> (fold change) | p-value  |
| CXCL6      | 5.597614945                    | 1.91E-43 | 6.509501976                    | 3.53E-58 | 5.741659725                    | 1.23E-45 |
| SOD2       | 2.81705125                     | 1.23E-43 | 2.887465979                    | 9.17E-46 | 2.900980272                    | 3.54E-46 |
| CCL20      | 5.300510006                    | 4.49E-35 | 5.68262129                     | 4.61E-40 | 5.787032343                    | 1.74E-41 |
| DEFB4B     | 7.243911346                    | 1.55E-32 | 7.562899546                    | 2.48E-35 | 6.777292196                    | 1.12E-28 |
| IKBKE      | 1.772301168                    | 5.87E-32 | 1.761030059                    | 1.13E-31 | 1.848226461                    | 7.45E-35 |
| CXCL2      | 3.549344875                    | 1.91E-29 | 3.585719389                    | 4.61E-30 | 3.872555325                    | 7.66E-35 |
| IL32       | 3.488754107                    | 7.37E-27 | 3.208438023                    | 6.21E-23 | 3.24484966                     | 1.90E-23 |
| CXCL5      | 4.548879155                    | 7.53E-25 | 4.678411666                    | 3.43E-26 | 4.944753146                    | 4.57E-29 |
| TNFAIP2    | 3.528253199                    | 7.49E-25 | 3.554410485                    | 3.36E-25 | 3.688265891                    | 5.20E-27 |
| ZC3H12A    | 2.524102503                    | 1.70E-24 | 2.61729811                     | 2.96E-26 | 2.507612265                    | 3.15E-24 |
| CXCL1      | 3.381493656                    | 7.73E-23 | 3.642327409                    | 2.99E-26 | 3.71203949                     | 3.33E-27 |
| NFKBIA     | 2.140364484                    | 3.10E-22 | 1.686581117                    | 2.15E-14 | 2.154868819                    | 1.53E-22 |
| LAMC2      | 1.760129217                    | 2.23E-20 | 1.936218087                    | 2.49E-24 | 1.673663127                    | 1.41E-18 |
| SLC6A14    | 3.254708399                    | 8.97E-20 | 3.135119739                    | 1.84E-18 | 3.619726693                    | 4.39E-24 |
| IL6ST      | 1.240230314                    | 3.66E-19 | 0.912677163                    | 4.56E-11 | 1.109059508                    | 1.23E-15 |
| C6orf222   | 2.81489137                     | 4.21E-19 | 2.682175885                    | 1.71E-17 | 3.297339889                    | 1.01E-25 |
| TNFSF14    | 3.113410599                    | 7.88E-19 | 2.86115791                     | 3.89E-16 | 3.111467391                    | 5.97E-19 |
| CXCL10     | 5.644047208                    | 8.80E-19 | 4.643498418                    | 3.49E-13 | 5.670983023                    | 5.93E-19 |
| NFKBIZ     | 1.098090646                    | 3.10E-18 | 1.020753522                    | 5.54E-16 | 1.42227805                     | 1.29E-29 |
| VNN3       | 3.025897821                    | 3.58E-18 | 2.535691843                    | 4.98E-13 | 2.946707147                    | 2.05E-17 |
| CXCL3      | 2.72446395                     | 6.00E-18 | 2.968790533                    | 4.86E-21 | 2.974344351                    | 4.08E-21 |
| OPTN       | 1.384529312                    | 1.54E-17 | 1.112710255                    | 7.20E-12 | 1.233040915                    | 2.96E-14 |
| GGCT       | -0.96413316                    | 5.42E-16 | -0.519949982                   | 6.83E-06 | -0.562284855                   | 1.23E-06 |
| UBD        | 3.513513093                    | 2.93E-15 | 4.889304684                    | 2.94E-28 | 3.232234774                    | 3.84E-13 |
| TMEM14A    | -1.109393403                   | 3.28E-15 | -0.885223488                   | 6.48E-11 | -0.89228916                    | 3.68E-11 |
| RARRES1    | 2.498000834                    | 8.90E-15 | 2.887854218                    | 2.41E-19 | 2.106430486                    | 6.34E-11 |
| ADAR       | 0.427531921                    | 1.38E-14 | 0.238485553                    | 1.72E-05 | 0.356327219                    | 1.23E-10 |
| KLHL5      | 0.77103178                     | 3.95E-14 | 0.865405647                    | 1.52E-17 | 1.013609706                    | 1.34E-23 |
| ICAM1      | 3.796347735                    | 4.52E-14 | 3.4380986                      | 8.37E-12 | 3.750145211                    | 9.06E-14 |
| ZC3H12C    | 1.041126776                    | 5.48E-14 | 1.036742073                    | 6.12E-14 | 0.913948456                    | 3.76E-11 |
| TNFAIP3    | 2.43530681                     | 7.90E-14 | 1.790749504                    | 4.11E-08 | 2.457862458                    | 4.54E-14 |
| ATP5H      | -0.575098915                   | 1.54E-13 | -0.265514025                   | 0.00055  | -0.353269813                   | 4.45E-06 |
| GCNT3      | 1.881369483                    | 2.26E-13 | 1.601323428                    | 4.37E-10 | 2.290811034                    | 4.12E-19 |
| SPRR2A     | 7.554988969                    | 3.06E-13 | 7.519575376                    | 3.91E-13 | 6.92393794                     | 2.41E-11 |
| P11-761N21 | 41.59064444                    | 5.54E-13 | -0.296849595                   | 0.95958  | -0.48560085                    | 0.933921 |
| CBX3       | -0.500354773                   | 5.82E-13 | -0.247151293                   | 0.00033  | -0.180912735                   | 0.008446 |
| DUT        | -1.13899228                    | 6.40E-13 | -0.587408132                   | 0.00015  | -0.829709676                   | 9.66E-08 |
| LRP11      | -0.775958413                   | 6.51E-13 | -0.546366315                   | 2.98E-07 | -0.541789385                   | 3.72E-07 |
| FANCL      | -0.901078799                   | 1.03E-12 | -0.642984515                   | 2.67E-07 | -0.550609781                   | 9.21E-06 |
| GRINA      | 0.928222913                    | 1.87E-12 | 0.226091312                    | 0.08775  | 0.204630421                    | 0.122651 |
| LIPG       | 1.302639796                    | 2.45E-12 | 1.532775795                    | 1.41E-16 | 1.504914798                    | 4.96E-16 |
| ARF3       | 0.739554728                    | 3.20E-12 | 0.354766343                    | 0.00083  | 0.515803633                    | 1.17E-06 |
| SGK1       | 1.793845931                    | 4.34E-12 | 1.506011266                    | 6.04E-09 | 1.72402544                     | 2.72E-11 |
| SDCBP2     | 1.210653999                    | 4.79E-12 | 1.201867816                    | 6.48E-12 | 1.106909692                    | 2.55E-10 |

|            |              |          |              |          |              |          |
|------------|--------------|----------|--------------|----------|--------------|----------|
| RHOG       | 0.8240319    | 6.26E-12 | 0.449121935  | 0.00021  | 0.516825472  | 1.78E-05 |
| DUOXA2     | 3.408401335  | 7.75E-12 | 3.489417724  | 2.44E-12 | 2.866612894  | 8.68E-09 |
| MYO1B      | 0.780714645  | 8.83E-12 | 0.620782467  | 5.62E-08 | 0.931320443  | 3.28E-16 |
| UNG        | -1.124012539 | 9.25E-12 | -0.759591931 | 3.23E-06 | -1.15477972  | 1.98E-12 |
| SNPH       | 3.512013436  | 1.02E-11 | 3.877783443  | 5.52E-14 | 3.094058934  | 2.08E-09 |
| TUBB2A     | 1.046674747  | 1.43E-11 | 0.999516965  | 1.06E-10 | 0.777468403  | 5.28E-07 |
| BCL3       | 1.747587301  | 1.70E-11 | 0.719916958  | 0.00593  | 1.045370087  | 6.19E-05 |
| LITAF      | 1.246092133  | 1.90E-11 | 0.34401987   | 0.06432  | 1.178132216  | 2.11E-10 |
| OAS3       | 1.043870529  | 2.42E-11 | 0.882061759  | 1.66E-08 | 0.969798058  | 5.33E-10 |
| HRSP12     | -0.920525472 | 2.53E-11 | -0.52918143  | 5.88E-05 | -0.481236723 | 0.000241 |
| IL8        | 3.833444329  | 3.34E-11 | 3.907650753  | 1.38E-11 | 4.040425034  | 2.76E-12 |
| MAD2L1     | -0.916182482 | 4.68E-11 | -0.485781998 | 0.00042  | -0.314594574 | 0.022138 |
| DEFB4A     | 5.643649266  | 5.57E-11 | 6.545360238  | 2.70E-14 | 5.497031499  | 1.71E-10 |
| JAK1       | 0.770275454  | 5.84E-11 | 0.90801077   | 1.11E-14 | 0.825329531  | 2.19E-12 |
| SRD5A3     | 1.220683742  | 6.87E-11 | 1.302562207  | 3.16E-12 | 1.11477368   | 2.48E-09 |
| TOMM7      | -0.74908048  | 6.90E-11 | -0.36082279  | 0.00136  | -0.48890904  | 1.48E-05 |
| VRK1       | -1.022921749 | 7.25E-11 | -0.72287658  | 3.14E-06 | -0.518777287 | 0.000804 |
| CX3CL1     | 2.250984176  | 8.76E-11 | 2.373116585  | 6.92E-12 | 1.715050187  | 8.17E-07 |
| IL19       | 5.591551302  | 9.81E-11 | 6.394229779  | 1.14E-13 | 5.408928801  | 3.85E-10 |
| LYN        | 1.292225838  | 1.06E-10 | 1.418941682  | 1.19E-12 | 1.171901197  | 4.54E-09 |
| TMEM261    | -0.673174017 | 1.11E-10 | -0.236725101 | 0.02065  | -0.359025737 | 0.00045  |
| SBNO2      | 1.883607379  | 1.13E-10 | 1.167081017  | 6.95E-05 | 1.666162769  | 1.20E-08 |
| IFNGR1     | 1.129848143  | 1.42E-10 | 1.414369385  | 8.79E-16 | 1.205472814  | 7.30E-12 |
| SRP9       | -0.387462927 | 1.48E-10 | -0.10644328  | 0.07639  | -0.043284965 | 0.470641 |
| TNIP1      | 1.123604486  | 1.48E-10 | 0.845501299  | 1.44E-06 | 1.077540019  | 7.94E-10 |
| TAPBP      | 0.793432194  | 1.66E-10 | 0.533591129  | 1.73E-05 | 0.253336934  | 0.041621 |
| GDI1       | 0.686535517  | 1.73E-10 | 0.335708236  | 0.00185  | 0.546072767  | 3.65E-07 |
| C3         | 2.128478     | 1.90E-10 | 2.072005609  | 5.62E-10 | 2.255752315  | 1.47E-11 |
| MAGI1      | -0.912158151 | 2.32E-10 | -0.920808721 | 1.37E-10 | -0.827531016 | 7.66E-09 |
| EGR1       | 1.657152958  | 2.61E-10 | 0.599470615  | 0.02274  | 1.043900363  | 7.01E-05 |
| ST5        | 0.989822237  | 2.93E-10 | 0.526849596  | 0.00081  | 0.634150616  | 5.46E-05 |
| SRF        | 0.635346464  | 3.40E-10 | 0.192211469  | 0.05935  | 0.487567602  | 1.36E-06 |
| WARS       | 0.873175691  | 3.50E-10 | 0.626076753  | 6.79E-06 | 0.692028472  | 6.49E-07 |
| LTB        | 3.420563091  | 3.61E-10 | 3.612286212  | 2.71E-11 | 3.608214334  | 2.85E-11 |
| NDUFA1     | -0.571958584 | 3.66E-10 | -0.128806171 | 0.14341  | -0.25953538  | 0.003307 |
| AP006216.1 | -2.397634892 | 4.31E-10 | -1.257563179 | 0.00079  | -1.388393018 | 0.000214 |
| KYNU       | 2.153901238  | 4.64E-10 | 2.611680195  | 4.00E-14 | 2.246838878  | 7.89E-11 |
| CTPS2      | -0.532610633 | 4.79E-10 | -0.439366461 | 2.34E-07 | -0.141527286 | 0.094172 |
| NFKB2      | 1.601585115  | 4.87E-10 | 0.987012427  | 0.00013  | 1.423392504  | 3.18E-08 |
| AHCYL2     | 1.36495043   | 4.98E-10 | 1.106620406  | 4.63E-07 | 1.260965898  | 8.97E-09 |
| THBS1      | 1.803482362  | 5.33E-10 | 0.909682374  | 0.00174  | 1.682355858  | 6.94E-09 |
| CYB5A      | -0.832269799 | 5.47E-10 | -0.5621977   | 2.47E-05 | -0.546903187 | 4.01E-05 |
| MCMDC2     | -1.011402836 | 5.85E-10 | -0.50333863  | 0.00096  | -0.523837719 | 0.000594 |
| RPL36A     | -1.122643901 | 6.83E-10 | -0.580480521 | 0.00136  | -0.508350616 | 0.005021 |
| DAPK3      | 0.862217556  | 7.35E-10 | 0.498107223  | 0.00039  | 0.796835547  | 1.12E-08 |
| SLC2A6     | 1.898462139  | 7.42E-10 | 1.930526359  | 3.48E-10 | 1.742565707  | 1.53E-08 |
| CEBPD      | 2.034039059  | 7.73E-10 | 1.436825367  | 1.43E-05 | 1.333215784  | 5.67E-05 |

|            |              |          |              |          |              |          |
|------------|--------------|----------|--------------|----------|--------------|----------|
| TNFRSF9    | 7.659960442  | 7.90E-10 | 7.027694961  | 1.82E-08 | 7.924369166  | 1.92E-10 |
| PCNXL3     | 0.681966835  | 9.01E-10 | 0.098206197  | 0.38066  | 0.006234181  | 0.955698 |
| OSBPL1A    | -0.65202699  | 9.71E-10 | -0.542735711 | 2.09E-07 | -0.536738856 | 2.96E-07 |
| BIRC3      | 2.031788226  | 9.94E-10 | 1.875688178  | 1.68E-08 | 2.219654682  | 2.36E-11 |
| PI3        | 4.514295293  | 1.04E-09 | 3.778124193  | 3.52E-07 | 4.678278827  | 2.38E-10 |
| SPRR1A     | 5.042591801  | 1.05E-09 | 5.917954299  | 6.35E-13 | 4.968244709  | 1.77E-09 |
| S100A3     | 4.154951994  | 1.15E-09 | 4.638630274  | 7.75E-12 | 4.176635805  | 8.38E-10 |
| MAP3K11    | 0.693739125  | 1.27E-09 | 0.410353961  | 0.00034  | 0.410036703  | 0.000347 |
| DHRS7      | -0.803439786 | 1.30E-09 | -0.326922026 | 0.01273  | -0.488112112 | 0.000205 |
| PCNA       | -1.005738298 | 1.30E-09 | -0.620143094 | 0.00017  | -0.644977754 | 9.28E-05 |
| TCEA1      | -0.527456712 | 1.56E-09 | -0.321889699 | 0.00021  | -0.222491239 | 0.010145 |
| PKHD1      | -0.982112426 | 1.64E-09 | -0.395990184 | 0.01201  | -0.822799963 | 2.67E-07 |
| ARHGEF19   | -0.906836507 | 1.76E-09 | -0.808328204 | 5.76E-08 | -1.031712986 | 7.68E-12 |
| TRIM31     | 2.283307349  | 2.01E-09 | 1.445754058  | 0.00015  | 1.979752761  | 1.95E-07 |
| OXTR       | 1.872062874  | 2.31E-09 | 2.09403756   | 1.68E-11 | 1.602138367  | 3.27E-07 |
| ADAMTS1    | 0.818513386  | 2.43E-09 | 0.253395319  | 0.06533  | 0.827061609  | 1.52E-09 |
| AKT1S1     | 0.712082873  | 2.41E-09 | 0.319459117  | 0.00769  | 0.197010949  | 0.100573 |
| TD-2287O16 | -1.060655442 | 2.95E-09 | -0.480477826 | 0.00686  | -0.725438538 | 4.56E-05 |
| CFLAR      | 0.893497947  | 3.09E-09 | 0.819235284  | 5.46E-08 | 0.823406496  | 4.64E-08 |
| P11-274B21 | 1.14397746   | 3.28E-09 | 0.152091661  | 0.44299  | 0.596413844  | 0.002214 |
| SPRY4      | 0.857090204  | 3.44E-09 | 0.312411794  | 0.03175  | 0.318719907  | 0.028335 |
| CRIM1      | 0.808057485  | 3.49E-09 | 0.408088094  | 0.00287  | 0.467752247  | 0.000629 |
| XK         | -1.307413552 | 3.52E-09 | -0.706861575 | 0.00131  | -1.559582824 | 1.88E-12 |
| ZFP36L1    | 0.80995857   | 3.58E-09 | 0.192860959  | 0.16084  | 0.226087594  | 0.100047 |
| RBMS2      | 0.831072823  | 4.02E-09 | 0.091317757  | 0.52063  | 0.515517083  | 0.000265 |
| SMIM14     | -0.920356608 | 4.72E-09 | -0.702452987 | 7.44E-06 | -0.953137908 | 1.25E-09 |
| TFPI       | 0.857527696  | 5.05E-09 | 0.80311841   | 4.35E-08 | 1.061677869  | 4.43E-13 |
| MANEA      | -1.043933113 | 5.16E-09 | -0.586391259 | 0.00088  | -0.644443125 | 0.000262 |
| HMGCS2     | -2.145084551 | 5.81E-09 | -1.944823769 | 1.26E-07 | -2.776882568 | 5.06E-14 |
| PTAFR      | 2.08269672   | 5.89E-09 | 2.078119779  | 6.04E-09 | 1.729308025  | 1.36E-06 |
| SLC37A1    | 0.778740834  | 6.32E-09 | 0.843538448  | 2.86E-10 | 0.7534075    | 1.77E-08 |
| EBPL       | -0.666519522 | 6.68E-09 | -0.3913369   | 0.00045  | -0.327597778 | 0.003121 |
| PIEZO1     | 1.161804005  | 7.16E-09 | 0.960746671  | 1.70E-06 | 0.881797978  | 1.14E-05 |
| ZSWIM8     | 0.848846927  | 7.16E-09 | 0.646082326  | 1.07E-05 | 0.808842898  | 3.44E-08 |
| TXNDC16    | -0.924801854 | 7.67E-09 | -0.382148956 | 0.01395  | -0.477349904 | 0.002123 |
| PRPS2      | -1.128194735 | 7.89E-09 | -0.63835787  | 0.00105  | -1.099318714 | 1.79E-08 |
| AKR7A2     | -0.537260994 | 8.57E-09 | -0.330410921 | 0.00029  | -0.621259567 | 1.69E-11 |
| RAC1       | 0.668410322  | 9.92E-09 | 0.634843234  | 5.14E-08 | 0.66059181   | 1.44E-08 |
| PAPSS1     | -0.505658916 | 1.03E-08 | -0.258262326 | 0.00302  | -0.272495755 | 0.001786 |
| SMAD3      | 1.12838624   | 1.01E-08 | 0.666306684  | 0.00072  | 0.861489262  | 1.22E-05 |
| ZDHC20     | -0.511427155 | 1.02E-08 | -0.201649913 | 0.02344  | -0.323881646 | 0.000273 |
| CTDSPL     | -0.558971646 | 1.08E-08 | -0.469070427 | 1.46E-06 | -0.38035579  | 9.09E-05 |
| ARHGAP18   | -0.73930156  | 1.12E-08 | -0.486476297 | 0.00015  | -0.810989946 | 3.12E-10 |
| ABCD3      | -0.513848332 | 1.22E-08 | -0.117508019 | 0.18923  | -0.232584304 | 0.009432 |
| NUAK2      | 1.931246631  | 1.23E-08 | 0.986457277  | 0.0043   | 1.427838279  | 2.82E-05 |
| ACKR3      | 1.209052734  | 1.29E-08 | 0.477257535  | 0.02528  | 0.692673342  | 0.001146 |
| GPD1L      | -0.86539446  | 1.46E-08 | -0.535898486 | 0.00039  | -0.753721505 | 6.61E-07 |

|          |              |          |              |          |              |          |
|----------|--------------|----------|--------------|----------|--------------|----------|
| OLR1     | 2.021675274  | 1.51E-08 | 1.61692195   | 6.06E-06 | 1.54659457   | 1.53E-05 |
| PEA15    | 0.740141492  | 1.67E-08 | 0.424887519  | 0.0012   | 0.579580669  | 9.62E-06 |
| ACADM    | -0.523580814 | 1.72E-08 | -0.214300881 | 0.0185   | -0.25101614  | 0.005846 |
| CXCL16   | 1.08631005   | 1.92E-08 | 0.939327202  | 1.19E-06 | 0.815941737  | 2.50E-05 |
| MAP7D2   | 2.044438195  | 1.96E-08 | 1.589739549  | 1.21E-05 | 1.583887369  | 1.34E-05 |
| CSNK1G2  | 0.800056244  | 2.02E-08 | 0.492088604  | 0.00056  | 0.587523813  | 3.73E-05 |
| DSE      | 1.190835587  | 2.01E-08 | 1.181225253  | 2.59E-08 | 1.355070046  | 1.67E-10 |
| TNFAIP1  | 0.758281013  | 2.01E-08 | 0.52836411   | 9.32E-05 | 0.793641182  | 3.95E-09 |
| CDC23    | -0.482935901 | 2.18E-08 | -0.113129533 | 0.18072  | -0.064043375 | 0.446817 |
| SGPP2    | 1.44730145   | 2.17E-08 | 1.299230758  | 5.02E-07 | 1.443567     | 2.30E-08 |
| DNA2     | -0.987236533 | 2.20E-08 | -0.448523422 | 0.01027  | -0.435444241 | 0.012366 |
| LRBA     | -0.495041609 | 2.28E-08 | -0.347470332 | 8.34E-05 | -0.298655442 | 0.000719 |
| TBCA     | -0.564954188 | 2.32E-08 | -0.444996967 | 8.98E-06 | -0.189720482 | 0.056882 |
| RND1     | 2.639282658  | 2.57E-08 | 2.808872572  | 3.02E-09 | 2.757753781  | 5.78E-09 |
| MCM3     | -0.676708143 | 2.75E-08 | -0.555436134 | 4.79E-06 | -0.384852223 | 0.001511 |
| VNN1     | 2.340496975  | 3.18E-08 | 2.003150053  | 2.43E-06 | 1.994892825  | 2.59E-06 |
| SCCPDH   | -0.628845452 | 3.22E-08 | -0.220526362 | 0.0479   | -0.329642707 | 0.003153 |
| PTPN1    | 0.434070669  | 3.35E-08 | 0.069614103  | 0.37952  | 0.316589896  | 5.19E-05 |
| SDC4     | 1.32910536   | 3.35E-08 | 1.596113912  | 3.30E-11 | 1.493099798  | 5.49E-10 |
| ASAH1    | -0.585421283 | 3.49E-08 | -0.135440623 | 0.19802  | -0.531691622 | 4.90E-07 |
| TOMM70A  | -0.492287517 | 3.87E-08 | -0.242859441 | 0.00625  | -0.288258628 | 0.001177 |
| LRG1     | 1.271465963  | 3.98E-08 | 1.143773861  | 7.54E-07 | 1.230054245  | 1.03E-07 |
| SH3BGR12 | -0.798155847 | 4.28E-08 | -0.460647749 | 0.00153  | -0.921289671 | 2.49E-10 |
| TMEM181  | -0.586624764 | 4.47E-08 | -0.165977482 | 0.11996  | -0.560523673 | 1.61E-07 |
| RHBDF1   | 0.925268543  | 4.75E-08 | 0.523681633  | 0.00206  | 0.643379292  | 0.000148 |
| CCL2     | 2.782813523  | 4.84E-08 | 1.788613424  | 0.00046  | 2.361675494  | 3.64E-06 |
| MAP3K8   | 1.356221998  | 5.00E-08 | 1.477614882  | 2.66E-09 | 1.651823666  | 2.74E-11 |
| AASDHPPT | -0.539255337 | 5.08E-08 | -0.154057787 | 0.11533  | -0.040746916 | 0.676203 |
| TP53INP2 | 1.496945909  | 5.10E-08 | 0.70078026   | 0.01185  | 0.959313124  | 0.000513 |
| CXCL11   | 5.853814455  | 5.15E-08 | 5.505876634  | 3.08E-07 | 6.015783673  | 2.05E-08 |
| KLF6     | 0.914796385  | 5.50E-08 | 0.535504699  | 0.00147  | 0.818654897  | 1.12E-06 |
| TSPAN18  | 1.42294795   | 6.09E-08 | 0.814144143  | 0.00214  | 1.130304389  | 1.73E-05 |
| EIF4BP7  | -1.347281078 | 6.85E-08 | -0.055693393 | 0.81347  | -0.457830838 | 0.054606 |
| GPR153   | 0.957383812  | 7.21E-08 | 0.556517155  | 0.00187  | 0.635452372  | 0.000363 |
| TNFRSF1A | 0.633545417  | 7.50E-08 | 0.413336501  | 0.00044  | 0.463193892  | 8.26E-05 |
| HDAC9    | 1.619039692  | 7.60E-08 | 1.37779327   | 4.69E-06 | 1.896846263  | 2.83E-10 |
| ID1      | 1.168442558  | 8.01E-08 | 1.152992972  | 1.17E-07 | 1.436550137  | 3.97E-11 |
| MYO1C    | 0.578392991  | 8.36E-08 | 0.205578095  | 0.05698  | 0.359865516  | 0.000844 |
| CAPS     | -1.251932187 | 9.13E-08 | -0.602798223 | 0.00942  | -1.06278374  | 5.08E-06 |
| BRCA1    | -0.872049436 | 1.01E-07 | -0.379037314 | 0.01922  | -0.520171832 | 0.001318 |
| PTPRE    | 1.17733911   | 1.02E-07 | 1.272104144  | 6.62E-09 | 0.694233304  | 0.001705 |
| SCOC     | -0.714552048 | 1.09E-07 | -0.176712492 | 0.18591  | -0.242737265 | 0.069353 |
| GYS1     | 0.58303835   | 1.12E-07 | 0.28041413   | 0.0108   | 0.229827932  | 0.037057 |
| B4GALT1  | 1.048442096  | 1.16E-07 | 0.903195657  | 4.96E-06 | 0.550878417  | 0.005389 |
| RUFY1    | -0.535723893 | 1.21E-07 | -0.332154894 | 0.00091  | -0.242827637 | 0.014353 |
| RPL21    | -0.633187951 | 1.22E-07 | -0.29915677  | 0.01228  | -0.289391507 | 0.015409 |
| AKAP2    | 1.18526146   | 1.25E-07 | 0.3024774    | 0.17797  | 0.936999042  | 2.93E-05 |

|           |              |          |              |          |              |          |
|-----------|--------------|----------|--------------|----------|--------------|----------|
| GEMIN6    | -0.709914204 | 1.26E-07 | -0.248352303 | 0.05878  | -0.143649461 | 0.270403 |
| USP1      | -0.49615332  | 1.35E-07 | -0.108313441 | 0.24499  | 0.008686205  | 0.925547 |
| SPRR2F    | 4.053799865  | 1.43E-07 | 4.161115625  | 6.34E-08 | 3.666883045  | 1.99E-06 |
| HMG3      | -0.687799968 | 1.45E-07 | -0.351993436 | 0.00661  | -0.312198368 | 0.015862 |
| IVNS1ABP  | -0.423326084 | 1.48E-07 | -0.194444366 | 0.01522  | -0.180974291 | 0.023752 |
| IL6       | 3.511151041  | 1.51E-07 | 1.803501129  | 0.00781  | 3.220604125  | 1.48E-06 |
| NID1      | 0.881937449  | 1.50E-07 | 0.115535963  | 0.49203  | 0.460463117  | 0.00612  |
| POLA1     | -0.67444416  | 1.50E-07 | -0.483247682 | 0.00016  | -0.476801157 | 0.000189 |
| NFKBIB    | 1.038855762  | 1.52E-07 | 0.497045649  | 0.01238  | 0.443509741  | 0.025589 |
| MCM4      | -0.69462919  | 1.60E-07 | -0.390188668 | 0.00317  | -0.394943409 | 0.002798 |
| GALNT12   | -0.934885043 | 1.63E-07 | -0.618640243 | 0.00047  | -0.978568964 | 3.76E-08 |
| STOM      | 0.976999974  | 1.69E-07 | 0.522223899  | 0.00522  | 0.630606656  | 0.00074  |
| SPCS1     | -0.41677615  | 1.79E-07 | -0.101218766 | 0.19403  | -0.325281531 | 3.44E-05 |
| PLAGL1    | 0.854843779  | 2.01E-07 | 0.488453544  | 0.00306  | 0.30131933   | 0.067779 |
| BLOC1S5   | -0.714605911 | 2.24E-07 | -0.384856067 | 0.00474  | -0.446883393 | 0.00105  |
| ALG6      | -0.533303869 | 2.29E-07 | -0.11827926  | 0.22489  | -0.191459513 | 0.049498 |
| CREG1     | -0.655728071 | 2.36E-07 | -0.340338749 | 0.00669  | -0.639316103 | 4.00E-07 |
| CSNK1E    | 0.448218471  | 2.36E-07 | 0.156662358  | 0.07128  | 0.27264769   | 0.001641 |
| ADAMTS9   | 1.190503262  | 2.54E-07 | 1.190051287  | 2.54E-07 | 1.26435898   | 4.33E-08 |
| TMEM64    | -0.618296935 | 2.53E-07 | -0.248016464 | 0.03679  | -0.24429387  | 0.039597 |
| FAM46C    | -1.750895847 | 2.60E-07 | -1.137421203 | 0.00076  | -2.393229881 | 2.45E-12 |
| VPS35     | -0.468363447 | 2.76E-07 | -0.132460858 | 0.14436  | -0.212287062 | 0.019375 |
| UBQLN4    | 0.640123181  | 2.97E-07 | 0.328849643  | 0.00855  | 0.393706597  | 0.001597 |
| PRMT3     | -0.695099075 | 3.04E-07 | -0.225136303 | 0.08906  | -0.494962158 | 0.0002   |
| SCO1      | -0.562437887 | 3.04E-07 | -0.295027558 | 0.00683  | -0.350793623 | 0.001279 |
| WDHD1     | -0.8036096   | 3.09E-07 | -0.421253913 | 0.00682  | -0.344607867 | 0.026676 |
| MUC13     | 6.398486039  | 3.23E-07 | 5.223150778  | 3.15E-05 | 6.500521255  | 2.06E-07 |
| COX6C     | -0.482592484 | 3.36E-07 | -0.155747855 | 0.09398  | -0.171690572 | 0.064646 |
| BID       | 1.121048     | 3.59E-07 | 1.14705602   | 1.79E-07 | 0.680152591  | 0.001991 |
| UBL3      | -0.582110744 | 3.72E-07 | -0.340441791 | 0.00271  | -0.289277581 | 0.010699 |
| CCDC25    | -0.628812016 | 3.91E-07 | -0.476463116 | 0.00011  | -0.409452024 | 0.000864 |
| CUL4B     | -0.522396839 | 4.01E-07 | -0.402466143 | 8.86E-05 | -0.29157581  | 0.004429 |
| P11-384K6 | 1.179112045  | 4.02E-07 | 0.150610693  | 0.53034  | 0.131189353  | 0.584013 |
| CLUHP3    | 0.785496306  | 4.05E-07 | 0.642881679  | 3.23E-05 | 0.931836344  | 1.31E-09 |
| ITGA5     | 0.889990115  | 4.08E-07 | 0.452865485  | 0.00997  | 0.661291266  | 0.000166 |
| LIG1      | -0.714199386 | 4.07E-07 | -0.585284823 | 2.91E-05 | -0.535901155 | 0.000132 |
| MRPL33    | -0.503374954 | 4.25E-07 | -0.295935395 | 0.00218  | -0.311919414 | 0.001206 |
| SC5D      | 0.574205717  | 4.50E-07 | 0.275984312  | 0.01524  | 0.494842867  | 1.33E-05 |
| NIPSNAP3A | -0.536128249 | 4.59E-07 | -0.178872485 | 0.07702  | -0.256722526 | 0.011219 |
| CABLES1   | -1.234910499 | 4.71E-07 | -0.970221567 | 6.37E-05 | -1.519159466 | 5.81E-10 |
| FBXL4     | -0.545370296 | 4.70E-07 | -0.417615997 | 0.0001   | -0.515402128 | 1.59E-06 |
| PPIL1     | -0.548659241 | 4.96E-07 | -0.138676047 | 0.19721  | -0.067577675 | 0.529034 |
| SNX7      | -0.507076038 | 5.01E-07 | -0.07044481  | 0.47332  | -0.242092013 | 0.014118 |
| EEF1A1P9  | -0.916693706 | 5.08E-07 | -0.598065216 | 0.00063  | -0.463008958 | 0.00731  |
| ENPP1     | 1.107080551  | 5.45E-07 | 1.579197605  | 6.40E-13 | 0.665736585  | 0.002645 |
| ANKRD33B  | 3.341831341  | 5.51E-07 | 2.706823209  | 6.22E-05 | 3.217699846  | 1.34E-06 |
| SUMF1     | -0.529263909 | 5.59E-07 | -0.232042694 | 0.02585  | -0.495508745 | 2.30E-06 |

|           |              |          |              |          |              |          |
|-----------|--------------|----------|--------------|----------|--------------|----------|
| C1GALT1C1 | -0.669930627 | 5.63E-07 | -0.265572978 | 0.04398  | -0.358014517 | 0.006653 |
| EEF1A1    | -0.591335907 | 5.67E-07 | -0.306680014 | 0.00948  | -0.231386695 | 0.050299 |
| APIP      | -0.551225877 | 5.71E-07 | -0.320496384 | 0.00289  | -0.229542662 | 0.031405 |
| NSMF      | 0.878847173  | 5.84E-07 | 0.48875204   | 0.00575  | 0.679170347  | 0.000122 |
| PCGF3     | 0.407124359  | 5.85E-07 | 0.298660694  | 0.00024  | 0.394099267  | 1.19E-06 |
| NKIRAS2   | 0.378858071  | 6.01E-07 | 0.07109319   | 0.35145  | 0.183801535  | 0.01495  |
| MAT2B     | -0.421227378 | 6.29E-07 | -0.23092161  | 0.0056   | -0.159780593 | 0.054257 |
| IARS2     | -0.473342785 | 6.46E-07 | -0.21568046  | 0.02265  | -0.412084176 | 1.37E-05 |
| SLCO3A1   | 1.504914907  | 6.50E-07 | 1.030285786  | 0.00065  | 1.340602739  | 8.67E-06 |
| C1S       | 0.97412808   | 6.53E-07 | 0.604846493  | 0.00203  | 0.874598449  | 7.79E-06 |
| DSCC1     | -1.091980736 | 6.93E-07 | -0.651870353 | 0.00235  | -0.674038564 | 0.001616 |
| NADK2     | -0.499677664 | 7.30E-07 | -0.183903823 | 0.06255  | -0.251200616 | 0.011453 |
| RNF207    | 0.8932138    | 7.28E-07 | 0.449958103  | 0.01292  | 0.865970775  | 1.45E-06 |
| CCDC130   | 0.513670429  | 7.37E-07 | 0.325372182  | 0.00177  | 0.437874627  | 2.09E-05 |
| ZYX       | 0.946462435  | 7.50E-07 | 0.082486205  | 0.6674   | 0.373478635  | 0.051304 |
| CSF1      | 1.24039724   | 7.59E-07 | 0.634074176  | 0.01178  | 0.80322634   | 0.001388 |
| TSFM      | -0.576696808 | 8.04E-07 | -0.171552878 | 0.12701  | -0.139958655 | 0.211529 |
| JUND      | 0.701981327  | 8.13E-07 | 0.078149952  | 0.58514  | 0.313783568  | 0.027755 |
| SLC25A44  | 0.625078986  | 8.11E-07 | 0.376607704  | 0.00301  | 0.44843392   | 0.000401 |
| ALDH9A1   | -0.546783513 | 8.53E-07 | -0.377888852 | 0.0006   | -0.398941713 | 0.000296 |
| TSPAN13   | -0.561188496 | 8.54E-07 | -0.181679767 | 0.10875  | -0.420184254 | 0.000213 |
| MRPS18B   | -0.466576021 | 8.81E-07 | -0.253066775 | 0.00666  | -0.335650306 | 0.000317 |
| DUOX2     | 2.318599347  | 8.90E-07 | 2.421184509  | 2.86E-07 | 1.755546664  | 0.000199 |
| SUCLG2    | -0.577784514 | 9.75E-07 | -0.413483192 | 0.00044  | -0.482829845 | 4.04E-05 |
| IGFBP3    | 1.811827051  | 1.01E-06 | 1.471063742  | 7.18E-05 | 0.93344633   | 0.011776 |
| GABPB2    | -0.676590344 | 1.06E-06 | -0.374733139 | 0.00644  | -0.376009426 | 0.00632  |
| ZNF330    | -0.516474086 | 1.07E-06 | -0.184075531 | 0.07557  | -0.191185834 | 0.064037 |
| SCIN      | -1.438482694 | 1.08E-06 | -1.097544357 | 0.00019  | -2.105093908 | 1.04E-12 |
| RPIA      | -0.653891471 | 1.10E-06 | -0.249072486 | 0.05286  | -0.443965193 | 0.000623 |
| OXR1      | -0.594548976 | 1.13E-06 | -0.299137296 | 0.0137   | -0.512656636 | 2.48E-05 |
| RFC3      | -0.767587385 | 1.13E-06 | -0.573664606 | 0.00024  | -0.439161675 | 0.004721 |
| RPL39     | -0.601378097 | 1.13E-06 | -0.069503439 | 0.57314  | -0.314285721 | 0.010871 |
| AP2A1     | 0.516328055  | 1.16E-06 | 0.277846819  | 0.00882  | 0.116028708  | 0.275319 |
| FAM83A    | -0.773166667 | 1.17E-06 | 0.751087986  | 2.18E-06 | 0.289025563  | 0.068489 |
| MFSD6L    | -1.228724965 | 1.21E-06 | -0.612896433 | 0.01144  | -1.382288466 | 4.00E-08 |
| FAM213A   | -0.511037054 | 1.25E-06 | -0.396739425 | 0.00014  | -0.539370444 | 2.44E-07 |
| ATP10B    | 1.224474043  | 1.26E-06 | 1.357655119  | 7.54E-08 | 0.788395055  | 0.001814 |
| NUDT21    | -0.321790268 | 1.30E-06 | -0.152470187 | 0.02112  | -0.034926482 | 0.596236 |
| MAGOHB    | -0.621730678 | 1.31E-06 | -0.112269295 | 0.37261  | -0.090348173 | 0.470415 |
| ETV3      | 0.567853672  | 1.33E-06 | 0.614860549  | 1.46E-07 | 0.650248093  | 2.62E-08 |
| PIK3C2G   | -1.333581847 | 1.35E-06 | -0.326102693 | 0.23542  | -0.736050014 | 0.007458 |
| GLP1R     | -2.575182931 | 1.37E-06 | -2.176966584 | 1.91E-05 | -2.908264899 | 6.52E-08 |
| RAP1B     | 0.408723317  | 1.40E-06 | 0.39136618   | 3.63E-06 | 0.544231391  | 1.13E-10 |
| CFB       | 1.101375117  | 1.41E-06 | 1.328100559  | 5.83E-09 | 1.355682102  | 2.80E-09 |
| EIF4A2    | -0.435320321 | 1.44E-06 | -0.052776901 | 0.55839  | -0.194920642 | 0.030645 |
| SCP2      | -0.510171822 | 1.47E-06 | -0.220750405 | 0.03597  | -0.421226909 | 6.46E-05 |
| TMEM168   | -0.639837172 | 1.48E-06 | -0.197607862 | 0.13351  | -0.336393411 | 0.010688 |

|             |              |          |              |          |              |          |
|-------------|--------------|----------|--------------|----------|--------------|----------|
| TMEM167A    | -0.647614567 | 1.48E-06 | -0.322855331 | 0.0162   | -0.173921363 | 0.194837 |
| ESD         | -0.428521913 | 1.51E-06 | -0.23221582  | 0.00856  | -0.090744587 | 0.30237  |
| H3F3A       | -0.475975491 | 1.52E-06 | -0.167722059 | 0.08944  | -0.155549081 | 0.115138 |
| IFITM3      | 0.66870278   | 1.52E-06 | 0.272961731  | 0.04985  | 0.407374402  | 0.0034   |
| DPY30       | -0.545066693 | 1.55E-06 | -0.296995748 | 0.00746  | -0.293054856 | 0.008095 |
| ATP6V0A1    | 0.642880587  | 1.60E-06 | 0.36527874   | 0.0066   | 0.483522066  | 0.000312 |
| TAP1        | 1.024852498  | 1.69E-06 | 1.028262878  | 1.46E-06 | 0.767063276  | 0.000341 |
| ITGA1       | 0.942835069  | 1.76E-06 | 0.562261601  | 0.00439  | 0.730606601  | 0.000212 |
| NACC1       | 0.941533591  | 1.80E-06 | 0.037560907  | 0.84906  | 0.105433474  | 0.593148 |
| OSMR        | 1.160395242  | 1.80E-06 | 1.055639696  | 1.40E-05 | 0.996987783  | 4.09E-05 |
| SLC39A11    | -0.520249949 | 1.79E-06 | -0.085711465 | 0.41908  | -0.489438927 | 5.48E-06 |
| CDR1        | 2.071113333  | 1.81E-06 | 0.100018146  | 0.82536  | -0.055960915 | 0.902152 |
| PHIP        | -0.371507937 | 1.85E-06 | -0.177629341 | 0.02196  | -0.187728505 | 0.01542  |
| PYURF       | -0.501004238 | 1.86E-06 | -0.074737744 | 0.464    | -0.333439455 | 0.001199 |
| TMEM14C     | -0.453898719 | 1.89E-06 | -0.110587846 | 0.23514  | -0.407073693 | 1.52E-05 |
| POLR2G      | -0.578711815 | 2.05E-06 | -0.24416922  | 0.04136  | -0.30679037  | 0.0104   |
| SMIM7       | -0.408783085 | 2.05E-06 | -0.258500008 | 0.00238  | -0.237303765 | 0.005119 |
| AFM         | -3.08488267  | 2.13E-06 | -1.817216323 | 0.00366  | -1.737351416 | 0.004852 |
| KBTBD7      | -0.50166227  | 2.17E-06 | -0.281333423 | 0.00658  | -0.373997291 | 0.000311 |
| STAT6       | 0.433542481  | 2.17E-06 | 0.256096879  | 0.00512  | 0.291937236  | 0.001401 |
| C8orf4      | 1.847978081  | 2.22E-06 | 1.819726372  | 3.12E-06 | 2.005529721  | 2.71E-07 |
| CAPG        | -0.57596398  | 2.30E-06 | -0.212804359 | 0.07919  | -0.327701799 | 0.006908 |
| MED15       | 0.766315889  | 2.31E-06 | 0.319319684  | 0.04939  | 0.445275411  | 0.006084 |
| C1R         | 0.936266324  | 2.32E-06 | 0.928227702  | 2.79E-06 | 0.767870842  | 0.000106 |
| PRCP        | -0.406951245 | 2.35E-06 | -0.095987353 | 0.25569  | -0.14322551  | 0.089704 |
| CSF3        | 4.026403194  | 2.38E-06 | 4.002120264  | 2.71E-06 | 3.930299808  | 3.98E-06 |
| MTAP        | -0.510253785 | 2.42E-06 | -0.403423203 | 0.00018  | -0.264350282 | 0.014004 |
| TRIOBP      | 0.422513589  | 2.45E-06 | 0.278336635  | 0.00191  | 0.018983216  | 0.832672 |
| CFL2        | 0.745229846  | 2.47E-06 | 0.561591568  | 0.0004   | 0.934634926  | 2.75E-09 |
| PARP14      | 0.646243065  | 2.47E-06 | 0.745540214  | 5.08E-08 | 0.688530673  | 4.85E-07 |
| PPARD       | 0.75801454   | 2.54E-06 | 0.314148658  | 0.05344  | 0.337144799  | 0.037355 |
| TMEM107     | -0.638754916 | 2.54E-06 | 0.081791619  | 0.52458  | -0.297103319 | 0.022374 |
| ZMIZ2       | 0.674559555  | 2.66E-06 | -0.053417612 | 0.71228  | 0.082357989  | 0.568714 |
| SERPINB8    | 1.177067863  | 2.70E-06 | 1.103043163  | 1.10E-05 | 1.454188715  | 5.92E-09 |
| ZNF367      | -1.104576565 | 2.79E-06 | -0.337440039 | 0.14364  | -0.631514394 | 0.006428 |
| POGZ        | 0.580964174  | 2.81E-06 | 0.228534561  | 0.06596  | 0.251895532  | 0.042196 |
| CREB1       | 0.642529691  | 2.84E-06 | 0.006447985  | 0.96252  | 0.55171825   | 5.58E-05 |
| SLC30A1     | -0.577339325 | 2.90E-06 | -0.185759267 | 0.12855  | -0.485401506 | 7.60E-05 |
| RIMBP3C     | -0.723429782 | 2.91E-06 | -0.501913299 | 0.00117  | -0.336678531 | 0.029446 |
| NACAD       | 1.588655262  | 2.92E-06 | 1.06170111   | 0.00188  | 0.839336725  | 0.014656 |
| FEZ1        | 1.343141834  | 2.98E-06 | 1.560531212  | 5.04E-08 | 1.302683519  | 5.44E-06 |
| AB019441.29 | -1.518951105 | 3.01E-06 | -0.858779497 | 0.00359  | -0.917414634 | 0.001852 |
| RNF19A      | 1.124616064  | 3.04E-06 | 0.893091099  | 0.00021  | 1.075721262  | 7.91E-06 |
| STAP2       | 0.752695027  | 3.13E-06 | 0.894084438  | 2.74E-08 | 0.556077756  | 0.000563 |
| RFC5        | -0.66527524  | 3.17E-06 | -0.660354422 | 2.95E-06 | -0.325145383 | 0.020473 |
| LIMD2       | 1.058881159  | 3.21E-06 | 0.631855574  | 0.00558  | 0.789990192  | 0.000507 |
| IL3RA       | 1.538833057  | 3.22E-06 | 0.758831147  | 0.0264   | 1.230452561  | 0.000207 |

|           |              |          |              |          |              |          |
|-----------|--------------|----------|--------------|----------|--------------|----------|
| EEF1E1    | -0.692621497 | 3.30E-06 | -0.35247492  | 0.01648  | -0.28996546  | 0.048082 |
| SS18      | 0.45833907   | 3.36E-06 | 0.332896335  | 0.00072  | 0.394004247  | 6.05E-05 |
| FAM219A   | 0.893062176  | 3.38E-06 | 0.404589785  | 0.03601  | 0.692507577  | 0.00031  |
| COMT      | -0.741010438 | 3.48E-06 | -0.743148603 | 3.07E-06 | -0.903000376 | 1.52E-08 |
| GSTA4     | -0.555520919 | 3.52E-06 | -0.624828284 | 1.58E-07 | -0.48872778  | 3.59E-05 |
| HAUS4     | -0.607047145 | 3.55E-06 | -0.414158756 | 0.00124  | -0.443597883 | 0.000566 |
| WBP2      | 0.847702033  | 3.58E-06 | 0.480545704  | 0.00868  | 0.287638337  | 0.116868 |
| SAT1      | 1.193562608  | 3.61E-06 | 1.202784539  | 3.03E-06 | 1.19208166   | 3.70E-06 |
| MESDC1    | 0.600541126  | 3.80E-06 | 0.344142019  | 0.00827  | 0.355607883  | 0.006219 |
| RBPMS     | 0.593155037  | 3.81E-06 | 0.062134594  | 0.63031  | 0.49278443   | 0.00012  |
| C14orf159 | -0.642535192 | 3.87E-06 | -0.376626531 | 0.00606  | -0.410860778 | 0.002801 |
| CHEK2     | -0.627964942 | 3.92E-06 | -0.361099244 | 0.00669  | -0.314177591 | 0.018263 |
| TYMP      | 1.14852637   | 3.92E-06 | 1.323395959  | 8.20E-08 | 0.863826367  | 0.000534 |
| HSDL2     | -0.59458585  | 3.96E-06 | -0.247713773 | 0.05322  | -0.338276348 | 0.008355 |
| INSR      | 0.697254202  | 4.05E-06 | 0.609672022  | 5.53E-05 | 0.585054917  | 0.000108 |
| MACC1     | -0.624377025 | 4.04E-06 | -0.45269931  | 0.00082  | -0.561411703 | 3.33E-05 |
| MGRN1     | 0.788461206  | 4.12E-06 | 0.41746163   | 0.01511  | 0.427618931  | 0.012817 |
| RPS21     | -0.677511455 | 4.18E-06 | -0.139885525 | 0.33948  | -0.419073673 | 0.004267 |
| SH3BGRL3  | 0.807600037  | 4.26E-06 | 0.338120508  | 0.05454  | 0.240500916  | 0.171588 |
| FAM136A   | -0.579788571 | 4.46E-06 | -0.235291893 | 0.05994  | -0.274724703 | 0.028004 |
| PDCD4     | -0.875971652 | 4.49E-06 | -0.461410992 | 0.0155   | -1.127182057 | 3.52E-09 |
| TFAM      | -0.601365478 | 4.52E-06 | -0.345170497 | 0.00816  | -0.287332674 | 0.027531 |
| ALDH3A2   | -0.801645623 | 4.56E-06 | -0.723153859 | 3.44E-05 | -0.64036551  | 0.00024  |
| OSGEP     | -0.458990413 | 4.83E-06 | -0.207886533 | 0.0342   | -0.134701329 | 0.167658 |
| TMEM127   | 0.427735882  | 5.01E-06 | 0.176573774  | 0.06016  | 0.050236291  | 0.593    |
| DLGAP4    | 0.778878219  | 5.11E-06 | 0.3520536    | 0.04037  | 0.40956365   | 0.016745 |
| ORC1      | -0.81943997  | 5.14E-06 | -0.607385904 | 0.00064  | -0.546134749 | 0.002082 |
| RNF24     | 0.801926715  | 5.25E-06 | 0.547034602  | 0.00191  | 0.461348214  | 0.00883  |
| ENDOD1    | -0.582611444 | 5.34E-06 | -0.538444349 | 2.35E-05 | -0.791375108 | 6.16E-10 |
| PSMG2     | -0.393065606 | 5.35E-06 | -0.028962421 | 0.72837  | -0.047752928 | 0.566251 |
| KCTD10    | 0.516045788  | 5.57E-06 | 0.268727944  | 0.01803  | 0.502603192  | 8.94E-06 |
| PUS7L     | -0.596682157 | 5.58E-06 | -0.541337013 | 3.67E-05 | -0.361259359 | 0.005769 |
| GLTP      | 0.472884376  | 5.66E-06 | 0.413362526  | 6.56E-05 | 0.300684688  | 0.003759 |
| SLC35A1   | -0.466040654 | 5.67E-06 | -0.196893258 | 0.05048  | -0.311410078 | 0.002046 |
| IL4R      | 0.708990067  | 5.73E-06 | 0.514501466  | 0.00098  | 0.429825442  | 0.00588  |
| CSNK2B    | 0.497334108  | 5.79E-06 | 0.159867463  | 0.14563  | 0.390445632  | 0.000365 |
| HIF1A     | 0.623237901  | 5.84E-06 | 0.570661687  | 3.31E-05 | 0.789145746  | 9.31E-09 |
| DRAM1     | 0.855125061  | 5.94E-06 | 0.96099551   | 3.41E-07 | 0.667543571  | 0.000403 |
| MCM6      | -0.781239796 | 5.99E-06 | -0.644435189 | 0.00018  | -0.603336673 | 0.000451 |
| CREB3L4   | -0.956096274 | 6.12E-06 | -0.551654038 | 0.00713  | -0.694945778 | 0.000733 |
| PTPMT1    | -0.511955301 | 6.38E-06 | -0.296513504 | 0.00811  | -0.274909822 | 0.013801 |
| ZZZ3      | -0.417207916 | 6.36E-06 | -0.251051568 | 0.00621  | -0.252922771 | 0.005731 |
| DECR1     | -0.44974227  | 6.43E-06 | -0.162726946 | 0.09541  | -0.11570908  | 0.234545 |
| DCLRE1A   | -0.681369191 | 6.56E-06 | -0.205666905 | 0.16571  | -0.268045847 | 0.07123  |
| SNX2      | -0.532206863 | 6.56E-06 | -0.28172945  | 0.01633  | -0.337806551 | 0.004022 |
| EEF1A1P1  | -1.335905287 | 6.61E-06 | -0.021754016 | 0.93297  | -0.319039598 | 0.224488 |
| HDGF      | 0.535215328  | 6.65E-06 | 0.60535195   | 3.42E-07 | 0.670842497  | 1.59E-08 |



|            |              |          |              |          |              |          |
|------------|--------------|----------|--------------|----------|--------------|----------|
| GLRX       | 0.792560974  | 6.70E-06 | 0.582566339  | 0.00092  | 0.444525482  | 0.01185  |
| WWC3       | 0.725905219  | 6.80E-06 | 0.57768541   | 0.00034  | 0.445788363  | 0.005716 |
| DPY19L4    | -0.639521215 | 6.95E-06 | -0.224406925 | 0.1131   | -0.180726309 | 0.201512 |
| AGR2       | -0.802562411 | 7.10E-06 | -0.553432991 | 0.00195  | -0.622113355 | 0.000499 |
| DEPTOR     | -1.056353226 | 7.10E-06 | -0.786092563 | 0.00081  | -1.189979303 | 4.16E-07 |
| FABP6      | 5.712007943  | 7.24E-06 | 2.404518787  | 0.06041  | 2.579143615  | 0.043974 |
| TMEM230    | -0.303291935 | 7.24E-06 | -0.081239202 | 0.22004  | -0.25367928  | 0.000137 |
| WIZ        | 0.57003278   | 7.20E-06 | 0.021003258  | 0.87011  | 0.081366122  | 0.524974 |
| PFKM       | -0.642922254 | 7.52E-06 | -0.479118696 | 0.0008   | -0.327963325 | 0.021319 |
| SYNPR      | -2.187842129 | 7.55E-06 | -1.70106598  | 0.00047  | -2.701156957 | 3.77E-08 |
| TFE3       | 0.644136971  | 7.72E-06 | 0.279819742  | 0.05262  | 0.396245508  | 0.005903 |
| TBC1D10B   | 0.40914729   | 7.74E-06 | 0.166204635  | 0.07022  | 0.09706943   | 0.289062 |
| CIC        | 0.690142859  | 7.77E-06 | 0.072206963  | 0.64084  | 0.009625773  | 0.950432 |
| SAMD4A     | 1.089802622  | 7.98E-06 | 0.671561053  | 0.00599  | 0.948473355  | 9.91E-05 |
| RAD51AP1   | -0.815631332 | 8.08E-06 | -0.467219628 | 0.00951  | -0.31912612  | 0.075856 |
| CTTNBP2NL  | 0.495991709  | 8.16E-06 | 0.384062529  | 0.00055  | 0.465174724  | 2.75E-05 |
| RCL1       | -0.867430004 | 8.20E-06 | -0.094664578 | 0.61609  | -0.374301387 | 0.049065 |
| CDCA7L     | -0.826756645 | 8.23E-06 | -0.691003841 | 0.00019  | -0.584823851 | 0.001535 |
| SESN1      | -0.890617201 | 8.34E-06 | -0.481791714 | 0.01525  | -0.684354971 | 0.000579 |
| TBC1D5     | -0.46012424  | 8.33E-06 | -0.40380182  | 8.69E-05 | -0.470056544 | 4.86E-06 |
| EBI3       | 1.986774319  | 8.44E-06 | 2.179406195  | 8.73E-07 | 1.850798438  | 3.22E-05 |
| CCDC85A    | 1.947054685  | 8.54E-06 | 1.26519829   | 0.00427  | 1.737292217  | 7.07E-05 |
| FNDC3B     | 0.789140483  | 8.57E-06 | 0.579946335  | 0.00107  | 0.715209763  | 5.47E-05 |
| IRAK2      | 1.609667509  | 8.68E-06 | 1.533986636  | 2.21E-05 | 1.382448584  | 0.000133 |
| ORC3       | -0.384414766 | 8.83E-06 | -0.329088777 | 0.00012  | -0.217048862 | 0.01028  |
| SF3A2      | 0.528615819  | 8.91E-06 | 0.168407433  | 0.16449  | -0.022016392 | 0.855738 |
| DHX40      | -0.472555001 | 9.11E-06 | -0.105692627 | 0.31696  | -0.204449676 | 0.052861 |
| P11-407G23 | 1.12221621   | 9.12E-06 | 0.56044871   | 0.03055  | 0.711297337  | 0.005375 |
| FAM213B    | 0.556245936  | 9.37E-06 | 0.191443168  | 0.13112  | -0.056690852 | 0.658557 |
| SCML4      | -1.787517969 | 9.43E-06 | -1.287540647 | 0.00106  | -1.722479363 | 1.50E-05 |
| NUP37      | -0.502960889 | 9.53E-06 | -0.166641641 | 0.12988  | -0.1580262   | 0.149789 |
| PEX2       | -0.393047867 | 9.64E-06 | -0.039882246 | 0.64769  | -0.056099402 | 0.519497 |
| HMG2P46    | 1.074211746  | 9.95E-06 | 1.314012106  | 3.94E-08 | 1.064722264  | 9.86E-06 |
| ATXN2L     | 0.67124505   | 1.01E-05 | 0.112284657  | 0.46271  | -0.033557316 | 0.826239 |
| DUOXA1     | 2.015210504  | 1.03E-05 | 2.148833654  | 2.26E-06 | 1.994899808  | 1.18E-05 |
| ERI1       | -0.518837503 | 1.02E-05 | -0.377310034 | 0.00121  | -0.374923198 | 0.001255 |
| SF3B4      | 0.452292628  | 1.02E-05 | 0.068124432  | 0.51057  | 0.254994547  | 0.012846 |
| TMEM87A    | -0.477370911 | 1.02E-05 | -0.206770175 | 0.05349  | -0.32576673  | 0.002394 |
| ASUN       | -0.634810094 | 1.03E-05 | -0.343250953 | 0.01631  | -0.284742159 | 0.046076 |
| GRAMD1B    | -1.349987836 | 1.03E-05 | -1.211656824 | 6.43E-05 | -1.142188005 | 0.000162 |
| EFNA2      | 1.101850961  | 1.04E-05 | 0.542482963  | 0.03326  | 0.392939514  | 0.124992 |
| ATP5I      | -0.457604045 | 1.06E-05 | 0.056101337  | 0.58189  | -0.181383953 | 0.076264 |
| ADAT2      | -0.826156412 | 1.14E-05 | -0.830083269 | 9.20E-06 | -0.562466835 | 0.00244  |
| CRISPLD2   | 1.276438209  | 1.13E-05 | 0.721514708  | 0.0132   | 0.923644489  | 0.001496 |
| RDX        | 0.564529062  | 1.17E-05 | 0.30971768   | 0.01607  | 0.501883859  | 9.44E-05 |
| TEX9       | -0.758003691 | 1.17E-05 | -0.351350572 | 0.03957  | -0.453566961 | 0.008034 |
| BCAT2      | -0.720079014 | 1.18E-05 | -0.711943288 | 1.30E-05 | -0.795713504 | 1.14E-06 |

|             |              |          |              |          |              |          |
|-------------|--------------|----------|--------------|----------|--------------|----------|
| MYADM       | 0.659512254  | 1.19E-05 | -0.096140029 | 0.52631  | 0.150598888  | 0.319366 |
| BCL2L1      | 0.717145679  | 1.21E-05 | 0.166266517  | 0.31126  | 0.735483514  | 7.01E-06 |
| ANO5        | -0.874728283 | 1.22E-05 | -0.471877879 | 0.01589  | -0.502077863 | 0.010873 |
| GK          | 1.320617427  | 1.22E-05 | 1.527620946  | 4.07E-07 | 1.598155996  | 1.14E-07 |
| HLTF        | -0.648660966 | 1.22E-05 | -0.266966359 | 0.07033  | -0.302622584 | 0.040291 |
| WDR74       | -0.815607153 | 1.22E-05 | 0.166530307  | 0.37162  | -0.324937754 | 0.081301 |
| IL18R1      | 1.058961584  | 1.25E-05 | 1.376196275  | 1.16E-08 | 0.789314138  | 0.001121 |
| KRTCAP3     | -0.842478399 | 1.26E-05 | -0.34030538  | 0.06975  | -0.516923544 | 0.006099 |
| VCAM1       | 2.716676685  | 1.28E-05 | 2.003125266  | 0.0013   | 2.994082292  | 1.51E-06 |
| NEURL3      | 3.08237699   | 1.29E-05 | 3.058076371  | 1.42E-05 | 3.095600016  | 1.09E-05 |
| SH3GL1      | 0.470639724  | 1.30E-05 | 0.066063792  | 0.54201  | 0.057146267  | 0.59773  |
| BDKRB2      | 1.966028203  | 1.31E-05 | 1.326933755  | 0.00337  | 1.565881212  | 0.000522 |
| ELK1        | 0.559827022  | 1.31E-05 | 0.180835395  | 0.16285  | -0.023786398 | 0.854787 |
| MANBA       | -0.748573885 | 1.31E-05 | -0.556628526 | 0.00114  | -0.627805848 | 0.000247 |
| PCDHGB6     | 0.841864418  | 1.34E-05 | 0.224832585  | 0.24975  | 0.429524153  | 0.026899 |
| SLC25A46    | -0.370897711 | 1.35E-05 | -0.060648554 | 0.47292  | -0.110783366 | 0.18991  |
| ADRBK2      | 0.940355525  | 1.37E-05 | 0.575250065  | 0.00787  | 0.980556025  | 5.59E-06 |
| SP3         | -0.263245013 | 1.40E-05 | -0.079698358 | 0.18522  | -0.035266079 | 0.557183 |
| LRRC40      | -0.35918451  | 1.41E-05 | -0.187284352 | 0.02042  | -0.017090211 | 0.830221 |
| IARS        | -0.411740295 | 1.43E-05 | -0.192278688 | 0.04233  | -0.166704416 | 0.0783   |
| SPATA2      | 0.711469178  | 1.45E-05 | 0.084476044  | 0.6177   | 0.173927469  | 0.298745 |
| CENPU       | -0.81379286  | 1.48E-05 | -0.454785282 | 0.01426  | -0.361598568 | 0.050897 |
| PITHD1      | -0.433491482 | 1.49E-05 | -0.21591384  | 0.02806  | -0.240826223 | 0.014213 |
| THUMPD2     | -0.635125596 | 1.50E-05 | -0.505391093 | 0.0005   | -0.418126019 | 0.003643 |
| CCSAP       | -0.366574525 | 1.51E-05 | -0.03850967  | 0.63667  | -0.093502455 | 0.250894 |
| WSB2        | 0.469730425  | 1.51E-05 | 0.235135143  | 0.03025  | 0.271795205  | 0.01221  |
| NUP133      | -0.402242655 | 1.53E-05 | -0.169040076 | 0.06628  | -0.058879464 | 0.521342 |
| AEBP1       | 0.982687828  | 1.54E-05 | 0.478218401  | 0.03548  | 0.526944129  | 0.020573 |
| AGL         | -0.362374538 | 1.54E-05 | -0.096513698 | 0.24472  | -0.178787266 | 0.031451 |
| CENPH       | -0.78888077  | 1.58E-05 | -0.570357205 | 0.00149  | -0.302548258 | 0.088382 |
| GALNT7      | -0.576408669 | 1.58E-05 | -0.469874936 | 0.00042  | -0.548031713 | 3.90E-05 |
| SOCS3       | 1.668618432  | 1.58E-05 | 1.125392973  | 0.00361  | 1.697953445  | 1.11E-05 |
| RGP1        | 0.408426289  | 1.59E-05 | 0.1558647    | 0.09975  | 0.292309183  | 0.001952 |
| RP4-669L17. | 1.363190427  | 1.59E-05 | 0.463018594  | 0.15039  | 0.369410547  | 0.251831 |
| GXYLT2      | 1.128849132  | 1.62E-05 | 1.262225541  | 1.33E-06 | 0.730009114  | 0.005401 |
| TGDS        | -0.559829838 | 1.63E-05 | -0.253472286 | 0.04459  | -0.252091116 | 0.044413 |
| DMXL1       | 0.498706906  | 1.65E-05 | 0.599869569  | 2.04E-07 | 0.667037437  | 7.47E-09 |
| NR0B2       | -1.315513801 | 1.65E-05 | -1.346574459 | 9.96E-06 | -1.269789617 | 3.02E-05 |
| RNASEH2A    | -0.570721234 | 1.66E-05 | -0.271857731 | 0.03567  | -0.275026564 | 0.033162 |
| WIPI1       | 0.553326948  | 1.66E-05 | 0.54143434   | 2.36E-05 | 0.3471324    | 0.00679  |
| PXK         | 0.529359317  | 1.67E-05 | 0.140913694  | 0.25497  | 0.272781997  | 0.025987 |
| PCCA        | -0.662618344 | 1.68E-05 | -0.164535931 | 0.28196  | -0.310163562 | 0.042609 |
| UBE2E2      | 0.607610216  | 1.68E-05 | 0.351832942  | 0.01293  | 0.444299651  | 0.001562 |
| RPL9        | -0.681423846 | 1.69E-05 | -0.440458753 | 0.0054   | -0.514255715 | 0.001161 |
| WISP1       | 1.237188332  | 1.72E-05 | 0.482960225  | 0.094    | 0.89069803   | 0.001969 |
| CADPS2      | -0.962185794 | 1.75E-05 | -0.648796346 | 0.00357  | -1.042589099 | 3.10E-06 |
| FAHD2CP     | -1.244879343 | 1.76E-05 | -0.681582643 | 0.01402  | -1.255965244 | 1.06E-05 |

|            |              |          |              |          |              |          |
|------------|--------------|----------|--------------|----------|--------------|----------|
| PDE8A      | 0.599771442  | 1.77E-05 | 0.691292244  | 6.97E-07 | 0.635107197  | 5.17E-06 |
| ITGAV      | 0.751600463  | 1.79E-05 | 1.096336533  | 3.85E-10 | 0.906661032  | 2.26E-07 |
| RRM1       | -0.52779715  | 1.79E-05 | -0.254114252 | 0.03783  | -0.115521454 | 0.344499 |
| KDELC2     | -0.530550771 | 1.82E-05 | -0.203655832 | 0.0979   | -0.510949463 | 3.39E-05 |
| GABARAPL1  | 0.84629437   | 1.83E-05 | 0.371240374  | 0.06049  | 0.825670694  | 2.81E-05 |
| VCL        | 0.467314153  | 1.83E-05 | 0.020572594  | 0.85051  | 0.347729582  | 0.001425 |
| DBT        | -0.53654859  | 1.90E-05 | -0.215328863 | 0.08464  | -0.246417706 | 0.048958 |
| DSN1       | -0.684842837 | 1.90E-05 | -0.279354872 | 0.07494  | -0.280276988 | 0.074419 |
| NMD3       | -0.392355201 | 1.93E-05 | -0.188169374 | 0.03849  | -0.183443537 | 0.043395 |
| GNL3       | -0.518122025 | 1.99E-05 | -0.17806259  | 0.14075  | -0.215922676 | 0.073985 |
| MBNL1      | 0.422572507  | 2.01E-05 | 0.229840251  | 0.02016  | 0.261488118  | 0.008201 |
| NR2C2AP    | -0.854341097 | 2.01E-05 | -0.448418565 | 0.02086  | -0.472679133 | 0.015042 |
| UTRN       | -0.624283427 | 2.02E-05 | -0.330034154 | 0.02392  | -0.077299409 | 0.596492 |
| LCN15      | 3.622785171  | 2.06E-05 | 1.237110048  | 0.14841  | -0.040174718 | 0.962795 |
| TMEM128    | -0.662838919 | 2.07E-05 | -0.051408105 | 0.73031  | -0.183506063 | 0.21985  |
| ATP13A3    | -0.54681781  | 2.11E-05 | -0.449874891 | 0.00046  | -0.480687459 | 0.000182 |
| SEC11C     | -0.554226464 | 2.15E-05 | -0.151036947 | 0.23981  | -0.347094926 | 0.007058 |
| DOC2B      | 4.54943835   | 2.15E-05 | 4.187125342  | 9.75E-05 | 4.354377988  | 4.88E-05 |
| AC131180.1 | -8.006798869 | 2.19E-05 | -1.582578546 | 0.32134  | -1.402525196 | 0.379064 |
| AGR3       | -0.826007669 | 2.23E-05 | -0.509352852 | 0.00867  | -0.594667675 | 0.002179 |
| RAD1       | -0.469774803 | 2.26E-05 | 0.036316738  | 0.73899  | -0.043344273 | 0.690162 |
| RPS18      | -0.553249246 | 2.36E-05 | -0.243837261 | 0.06221  | -0.381266749 | 0.003551 |
| ETFB       | -0.569142264 | 2.39E-05 | -0.402396158 | 0.00272  | -0.4922352   | 0.000248 |
| KRT6B      | 4.78955966   | 2.37E-05 | 5.232378929  | 3.84E-06 | 4.569262414  | 5.53E-05 |
| MCEE       | -0.895944307 | 2.38E-05 | -0.351586782 | 0.0844   | -0.172945171 | 0.388247 |
| MGAT4B     | 0.436818737  | 2.37E-05 | 0.276258856  | 0.00744  | 0.105500337  | 0.308051 |
| SKIV2L2    | -0.339485574 | 2.38E-05 | -0.097749301 | 0.21949  | -0.035451299 | 0.655158 |
| ASS1       | 1.453945168  | 2.40E-05 | 1.970443722  | 9.47E-09 | 1.011059497  | 0.003337 |
| MUT        | -0.344798671 | 2.41E-05 | -0.054189546 | 0.49628  | -0.023405947 | 0.767985 |
| CCNI       | 0.460334823  | 2.45E-05 | 0.167622819  | 0.1246   | 0.186105319  | 0.088029 |
| UNC119     | 0.535349568  | 2.45E-05 | 0.413770351  | 0.00108  | 0.38800899   | 0.002184 |
| CDC42BPB   | 0.362820417  | 2.48E-05 | 0.150984818  | 0.07955  | 0.171599438  | 0.045957 |
| ALG5       | -0.451130231 | 2.49E-05 | -0.110243189 | 0.29266  | -0.293120532 | 0.005395 |
| STK40      | 0.50781574   | 2.50E-05 | 0.213665828  | 0.07724  | 0.34746004   | 0.003974 |
| SVIP       | -0.664161853 | 2.50E-05 | -0.368917458 | 0.01811  | -0.565648814 | 0.000293 |
| POU2F2     | 2.610235987  | 2.51E-05 | 2.213215031  | 0.00037  | 2.099454748  | 0.000731 |
| PTGES      | 1.691356467  | 2.51E-05 | 1.017388277  | 0.01143  | 0.966620261  | 0.016262 |
| ARHGAP26   | 0.836290869  | 2.53E-05 | 0.583475756  | 0.00325  | 0.867280427  | 1.20E-05 |
| CD69       | 2.014266205  | 2.56E-05 | 1.224282615  | 0.01065  | 2.188582531  | 4.66E-06 |
| BCL9L      | 1.092898723  | 2.58E-05 | -0.124493236 | 0.63386  | 0.527041168  | 0.043499 |
| LRRC45     | -0.778013455 | 2.58E-05 | -0.343484349 | 0.05611  | -0.762749634 | 3.41E-05 |
| EIF2S1     | -0.448383751 | 2.62E-05 | -0.096134421 | 0.36476  | -0.09830901  | 0.3532   |
| RPS3A      | -0.522090509 | 2.63E-05 | -0.29051694  | 0.0193   | -0.264479805 | 0.033166 |
| ATAD2      | -0.57112469  | 2.66E-05 | -0.281214799 | 0.03783  | -0.138937802 | 0.304232 |
| ECHS1      | -0.427529334 | 2.67E-05 | -0.118657731 | 0.2373   | -0.321431405 | 0.001426 |
| AKR1A1     | -0.389090322 | 2.72E-05 | -0.086028258 | 0.34877  | -0.127987823 | 0.163907 |
| C10orf32   | -0.626010226 | 2.71E-05 | -0.302232881 | 0.03958  | -0.331749598 | 0.024203 |

|            |              |          |              |          |              |          |
|------------|--------------|----------|--------------|----------|--------------|----------|
| GRB14      | -1.157058967 | 2.72E-05 | -0.871754572 | 0.00151  | -0.917711927 | 0.000721 |
| NDST2      | 0.774442339  | 2.72E-05 | 0.440187941  | 0.01729  | 0.40699331   | 0.027183 |
| ASF1B      | -0.730879989 | 2.78E-05 | -0.393649293 | 0.02179  | -0.622135053 | 0.000306 |
| TMEM101    | -0.512043202 | 2.80E-05 | -0.447637677 | 0.0002   | -0.381943024 | 0.001419 |
| ARHGAP29   | -0.67879364  | 2.81E-05 | -0.556584285 | 0.00057  | -0.642589059 | 6.96E-05 |
| FNBP1      | 0.505808102  | 2.81E-05 | 0.519934728  | 1.74E-05 | 0.547587635  | 5.69E-06 |
| MAPK1IP1L  | 0.736581728  | 2.85E-05 | -0.074776687 | 0.67105  | 0.313935866  | 0.074246 |
| TMX1       | -0.403018767 | 2.86E-05 | -0.090392656 | 0.34326  | -0.106802068 | 0.262235 |
| ACAA1      | -0.578132395 | 2.94E-05 | -0.387430905 | 0.00479  | -0.266209389 | 0.052013 |
| NRP2       | 0.999232888  | 2.92E-05 | 0.393724604  | 0.10023  | 0.527600516  | 0.027466 |
| OAT        | -0.600057743 | 2.94E-05 | -0.504974993 | 0.00041  | -0.583187161 | 4.65E-05 |
| RPL36      | -0.440771015 | 2.94E-05 | -0.113360821 | 0.2811   | -0.331628916 | 0.00163  |
| RPS12      | -0.545064536 | 2.93E-05 | -0.065411851 | 0.61555  | -0.279317144 | 0.032059 |
| ZNF146     | -0.336818018 | 3.02E-05 | -0.208040359 | 0.00959  | -0.035359864 | 0.658809 |
| ACTN1      | 0.450678794  | 3.04E-05 | 0.16892686   | 0.11811  | 0.329701419  | 0.002271 |
| HIVEP1     | 0.602153405  | 3.10E-05 | 0.024760091  | 0.86454  | 0.441276117  | 0.002234 |
| PLA2G12A   | -0.781499774 | 3.11E-05 | -0.414107116 | 0.02645  | -0.323958174 | 0.082786 |
| MOCOS      | -1.308460154 | 3.14E-05 | -0.448310506 | 0.15118  | -0.844818178 | 0.006984 |
| RNF141     | -0.423256354 | 3.19E-05 | -0.197678628 | 0.04927  | -0.276712993 | 0.005909 |
| ZDHHC4     | -0.538528481 | 3.21E-05 | -0.572594769 | 8.58E-06 | -0.346168069 | 0.006989 |
| CHKB-CPT1B | 0.770572929  | 3.29E-05 | 0.346642482  | 0.06182  | 0.658683205  | 0.000344 |
| SYDE1      | 1.030614041  | 3.30E-05 | 0.19024825   | 0.44588  | 0.470707654  | 0.058434 |
| GPN2       | 1.193870965  | 3.30E-05 | 0.398135156  | 0.1662   | 0.886140055  | 0.002034 |
| SULT1C4    | 1.150557605  | 3.34E-05 | -0.047185175 | 0.86855  | 0.930817538  | 0.00079  |
| RFC4       | -0.786938398 | 3.40E-05 | -0.365135422 | 0.05203  | -0.262362957 | 0.161233 |
| TXNRD3     | -0.590097036 | 3.40E-05 | -0.108229091 | 0.42078  | -0.59712264  | 1.69E-05 |
| ZBTB7A     | 0.614514163  | 3.41E-05 | 0.225590367  | 0.12975  | 0.139408403  | 0.349506 |
| SLC39A13   | 0.588043149  | 3.45E-05 | 0.148892119  | 0.29744  | 0.050368744  | 0.724227 |
| AGPAT3     | 0.414075501  | 3.47E-05 | 0.430997606  | 1.56E-05 | 0.183925356  | 0.066125 |
| CYB561     | -0.779468378 | 3.50E-05 | -0.49887482  | 0.00741  | -0.876829116 | 2.89E-06 |
| ATP6V0C    | 1.232779578  | 3.51E-05 | 0.667971578  | 0.02557  | 0.748479298  | 0.012228 |
| ELOVL5     | 0.648687175  | 3.53E-05 | 0.48064384   | 0.00218  | 0.835760115  | 9.36E-08 |
| TPRKB      | -0.493112319 | 3.61E-05 | -0.126912166 | 0.27     | -0.105403086 | 0.357511 |
| EHBP1L1    | 0.680990553  | 3.64E-05 | 0.285154377  | 0.08374  | 0.367060457  | 0.025849 |
| RHOT2      | 0.525627705  | 3.68E-05 | 0.107593556  | 0.40028  | 0.05969536   | 0.64097  |
| SLC44A1    | -0.575556779 | 3.71E-05 | -0.403066242 | 0.00381  | -0.530741987 | 0.000139 |
| CEP44      | -0.563751928 | 3.87E-05 | -0.183147574 | 0.1741   | -0.234700884 | 0.080767 |
| CPSF1      | 0.784504928  | 3.86E-05 | -0.074459201 | 0.70198  | 0.256761862  | 0.180673 |
| LRRRC8A    | 0.484827945  | 3.87E-05 | 0.340234135  | 0.00385  | 0.288824118  | 0.014192 |
| IL17C      | 3.632521577  | 3.96E-05 | 2.990042213  | 0.00074  | 2.927593212  | 0.00095  |
| IL23A      | 2.52230968   | 3.96E-05 | 2.055687795  | 0.00089  | 3.073282027  | 3.57E-07 |
| MRPL13     | -0.544709057 | 3.99E-05 | -0.093997977 | 0.46965  | -0.199052    | 0.125798 |
| PQLC3      | -0.784084467 | 4.05E-05 | -0.199988033 | 0.28176  | -0.660913319 | 0.000424 |
| F2R        | 0.700179671  | 4.10E-05 | 0.483482521  | 0.00462  | 0.635923934  | 0.000193 |
| KIAA1919   | -0.454657018 | 4.10E-05 | -0.300576954 | 0.00593  | -0.45029859  | 4.02E-05 |
| UBALD2     | 1.165636567  | 4.11E-05 | 0.377713846  | 0.18504  | 0.43528347   | 0.127191 |
| NDUFB3     | -0.444297723 | 4.13E-05 | -0.097996793 | 0.35542  | -0.151078738 | 0.154336 |

|          |              |          |              |          |              |          |
|----------|--------------|----------|--------------|----------|--------------|----------|
| BCAR1    | 0.703551829  | 4.18E-05 | 0.187788327  | 0.27495  | 0.497421822  | 0.003809 |
| ENKUR    | 2.437664284  | 4.20E-05 | 2.757409169  | 3.23E-06 | 1.893197062  | 0.001547 |
| ERMP1    | -0.457085833 | 4.20E-05 | -0.493710219 | 9.14E-06 | -0.609803149 | 4.43E-08 |
| SMC2     | -0.470228564 | 4.21E-05 | -0.082802779 | 0.46772  | -0.109563791 | 0.336411 |
| TOM1     | 0.871051221  | 4.24E-05 | 0.592166665  | 0.00543  | 0.817374054  | 0.000119 |
| ATP13A2  | 0.652293038  | 4.35E-05 | 0.345625231  | 0.03036  | 0.301009046  | 0.059751 |
| IRAK3    | 1.777228976  | 4.36E-05 | 1.770113874  | 4.62E-05 | 1.363335988  | 0.001726 |
| SETD5    | 0.443699123  | 4.37E-05 | 0.144795681  | 0.1827   | 0.325202867  | 0.002728 |
| CAPZB    | 0.306691102  | 4.42E-05 | 0.155961332  | 0.03767  | 0.249170603  | 0.000859 |
| LRRC58   | -0.322358929 | 4.47E-05 | -0.231324152 | 0.00315  | -0.231348454 | 0.003108 |
| VPS18    | 0.399559855  | 4.48E-05 | 0.32676666   | 0.00082  | 0.358121569  | 0.000221 |
| RPS27L   | -0.55401488  | 4.50E-05 | -0.196605822 | 0.14612  | -0.326718016 | 0.015762 |
| MRPS14   | -0.462603815 | 4.53E-05 | -0.190432242 | 0.08682  | -0.11589653  | 0.292864 |
| HIST1H4C | -0.72553868  | 4.56E-05 | -0.182216578 | 0.30468  | -0.072381616 | 0.683358 |
| BCKDHB   | -0.541817935 | 4.59E-05 | -0.437268317 | 0.0009   | -0.422114608 | 0.001406 |
| NLGN3    | 1.909281911  | 4.60E-05 | 1.56284818   | 0.001    | 1.054746252  | 0.027788 |
| NCOA7    | 0.949727855  | 4.61E-05 | 1.040241512  | 7.87E-06 | 0.92405427   | 7.25E-05 |
| MBOAT2   | -0.680599458 | 4.69E-05 | -0.386774103 | 0.0203   | -0.461462295 | 0.005638 |
| TCF19    | -0.723896497 | 4.71E-05 | -0.30797694  | 0.07888  | -0.466253356 | 0.00791  |
| CHAF1B   | -0.6279341   | 4.74E-05 | -0.536042994 | 0.00044  | -0.42136547  | 0.005515 |
| MICU2    | -0.342845404 | 4.73E-05 | -0.072859344 | 0.37784  | -0.126832757 | 0.124204 |
| KIAA1324 | -2.19358513  | 4.76E-05 | -1.502181111 | 0.00497  | -2.63174098  | 1.21E-06 |
| SLC38A4  | -1.135369636 | 4.78E-05 | -0.672630687 | 0.01514  | -1.014447811 | 0.000263 |
| OSGEPL1  | -0.664500968 | 4.85E-05 | -0.521870775 | 0.00109  | -0.29113893  | 0.064075 |
| PRICKLE2 | 0.86444935   | 4.86E-05 | 0.430560819  | 0.04333  | 0.490603552  | 0.021154 |
| CRLS1    | -0.438922656 | 4.90E-05 | -0.120331516 | 0.2572   | -0.153630577 | 0.148634 |
| SESTD1   | 0.569826406  | 4.90E-05 | 0.493943451  | 0.00043  | 0.645969696  | 3.98E-06 |
| SH2D1B   | 4.620154233  | 4.92E-05 | 3.260941718  | 0.00497  | 3.853440047  | 0.000796 |
| EEF1A1P6 | -0.861823018 | 4.94E-05 | -0.630409941 | 0.00286  | -0.841590017 | 7.04E-05 |
| STYK1    | -1.197504962 | 4.95E-05 | -0.680175351 | 0.02048  | -1.318464927 | 7.77E-06 |
| NUDT15   | -0.398918657 | 4.96E-05 | -0.227601003 | 0.01843  | -0.062151247 | 0.515842 |
| ACSL4    | 0.794687758  | 4.97E-05 | 0.941537626  | 1.53E-06 | 1.182045273  | 1.57E-09 |
| CCDC138  | -0.602393569 | 4.98E-05 | -0.467248153 | 0.0014   | -0.442348542 | 0.002445 |
| RPL22    | -0.438257418 | 5.00E-05 | -0.20352157  | 0.05912  | -0.269998777 | 0.01229  |
| UBE2M    | 0.439649284  | 5.00E-05 | 0.178020467  | 0.09907  | 0.149366952  | 0.167646 |
| CA8      | 1.32422422   | 5.03E-05 | 1.540620205  | 2.26E-06 | 1.306128601  | 6.25E-05 |
| PPARG    | -0.816691478 | 5.02E-05 | -0.566707707 | 0.00485  | -0.852075828 | 2.31E-05 |
| STT3B    | -0.325743805 | 5.04E-05 | 0.098193048  | 0.21973  | -0.18786184  | 0.018991 |
| MIPEP    | -0.692647188 | 5.06E-05 | -0.446647219 | 0.0083   | -0.55671001  | 0.000998 |
| NKX3-1   | 1.765761903  | 5.06E-05 | 0.098899542  | 0.82465  | 0.899282194  | 0.039796 |
| C4orf21  | -0.666542158 | 5.08E-05 | -0.341942347 | 0.0361   | -0.270187628 | 0.096856 |
| TOR1AIP2 | 0.254564009  | 5.17E-05 | 0.203778014  | 0.00116  | 0.351320858  | 2.02E-08 |
| CIAO1    | -0.312392545 | 5.21E-05 | -0.154316833 | 0.04267  | -0.181948685 | 0.016808 |
| MLXIP    | 0.639118566  | 5.23E-05 | -0.032532136 | 0.83784  | 0.098754463  | 0.534015 |
| BMPR1A   | 0.471831403  | 5.26E-05 | 0.409258575  | 0.00045  | 0.524989389  | 6.36E-06 |
| GCNT1    | -1.077023259 | 5.30E-05 | -0.646001305 | 0.01526  | -1.207275384 | 5.86E-06 |
| GEM      | 1.061202334  | 5.31E-05 | 0.4694093    | 0.07424  | 1.263613813  | 1.44E-06 |

|          |              |          |              |          |              |          |
|----------|--------------|----------|--------------|----------|--------------|----------|
| NOX1     | 2.172403175  | 5.30E-05 | 2.593614375  | 1.05E-06 | 2.127118137  | 6.67E-05 |
| GPX3     | 1.342196531  | 5.34E-05 | 0.924908118  | 0.00559  | 1.460337593  | 1.03E-05 |
| SLC4A4   | -0.761749098 | 5.35E-05 | -0.735312497 | 9.47E-05 | -0.483445433 | 0.010228 |
| CA5B     | 0.902148671  | 5.38E-05 | 0.791089082  | 0.00039  | 1.008934509  | 5.85E-06 |
| TMCO1    | -0.32386302  | 5.42E-05 | -0.173649769 | 0.02852  | -0.171273309 | 0.030572 |
| USP32P2  | 1.013359366  | 5.44E-05 | 0.676091018  | 0.00702  | 0.96860812   | 0.000104 |
| PGRMC1   | -0.384046454 | 5.51E-05 | -0.212020207 | 0.02553  | -0.31264025  | 0.000996 |
| PRCC     | 0.59669524   | 5.52E-05 | -0.064492607 | 0.66553  | 0.190979054  | 0.197758 |
| SSX2IP   | -0.477945221 | 5.51E-05 | -0.288696551 | 0.01397  | -0.133825293 | 0.252485 |
| NXF1     | 0.612478846  | 5.53E-05 | 0.089491234  | 0.55679  | 0.30421727   | 0.044853 |
| DIS3L    | -0.471547937 | 5.55E-05 | -0.177031515 | 0.1266   | -0.225357547 | 0.051036 |
| HIVEP2   | 0.781103034  | 5.60E-05 | 0.422087063  | 0.02962  | 0.760890647  | 8.57E-05 |
| BMPR2    | 0.607422994  | 5.63E-05 | 0.464923581  | 0.00205  | 0.474673849  | 0.001646 |
| CDC14B   | -0.556003544 | 5.65E-05 | -0.293351976 | 0.03282  | -0.299530753 | 0.029022 |
| CNOT3    | 1.033375642  | 5.73E-05 | 0.272915962  | 0.2915   | 0.188503735  | 0.468604 |
| SRFBP1   | -0.515064715 | 5.76E-05 | -0.278793068 | 0.02743  | -0.19351823  | 0.124682 |
| GIT2     | 0.474765368  | 5.82E-05 | 0.352029744  | 0.00287  | 0.349829059  | 0.002959 |
| PMS1     | -0.585224717 | 5.82E-05 | -0.247740507 | 0.08549  | -0.125267249 | 0.384001 |
| GOT1     | 0.446071366  | 5.87E-05 | 0.230812167  | 0.03653  | 0.502204349  | 4.65E-06 |
| HSPB11   | -0.453507644 | 5.98E-05 | -0.117079981 | 0.28329  | -0.21505867  | 0.049222 |
| THYN1    | -0.467661121 | 6.12E-05 | -0.084729863 | 0.45717  | -0.122829587 | 0.280404 |
| MRPL40   | -0.506823253 | 6.14E-05 | -0.214991635 | 0.08094  | -0.321175204 | 0.009381 |
| TMEM65   | -0.325891891 | 6.14E-05 | -0.099867794 | 0.20865  | -0.119462172 | 0.131828 |
| MYEF2    | -0.632773496 | 6.21E-05 | -0.336359665 | 0.03236  | -0.045218341 | 0.772134 |
| H2AFZ    | -0.617545975 | 6.26E-05 | -0.199243919 | 0.19517  | -0.13572393  | 0.377339 |
| STXBP6   | -0.79574914  | 6.26E-05 | -0.577596481 | 0.00342  | -1.052635533 | 1.16E-07 |
| RASGRP1  | 1.198289083  | 6.31E-05 | 1.581273795  | 1.10E-07 | 0.649429917  | 0.030477 |
| CMC1     | -0.751435629 | 6.32E-05 | -0.493882148 | 0.00822  | -0.734098836 | 7.44E-05 |
| CHI3L1   | 2.943779914  | 6.41E-05 | 2.774033452  | 0.00017  | 2.34544466   | 0.001514 |
| SF3B14   | -0.362965301 | 6.50E-05 | 0.101136746  | 0.25587  | 0.002776704  | 0.975144 |
| FBP1     | -1.193819798 | 6.54E-05 | -0.585734987 | 0.046    | -1.420106813 | 2.10E-06 |
| MAMLD1   | 1.74975069   | 6.54E-05 | 0.435779832  | 0.34509  | 1.023401972  | 0.022399 |
| NDUFA10  | 1.204436497  | 6.53E-05 | 0.358524911  | 0.23725  | 0.657583759  | 0.029431 |
| UBE2V1   | 0.391041256  | 6.73E-05 | 0.007546505  | 0.93889  | 0.245620944  | 0.012163 |
| CDCA7    | -0.807345294 | 6.75E-05 | -0.840170902 | 3.19E-05 | -0.686634329 | 0.000658 |
| ANKRD13D | 0.577928552  | 6.82E-05 | 0.250050028  | 0.08696  | 0.367742126  | 0.011248 |
| PQLC1    | 0.563874124  | 6.82E-05 | 0.446835642  | 0.00162  | 0.080440984  | 0.572222 |
| LDB2     | -0.844361216 | 6.93E-05 | -0.499556336 | 0.01749  | -0.78668826  | 0.00019  |
| PIK3AP1  | 1.394076318  | 6.98E-05 | 1.78043157   | 3.69E-07 | 1.900264866  | 5.73E-08 |
| TRNP1    | -0.837547218 | 7.03E-05 | -1.204326114 | 1.11E-08 | -0.832161158 | 7.80E-05 |
| PEX7     | -0.666253952 | 7.04E-05 | -0.282520283 | 0.0732   | -0.449247801 | 0.00472  |
| HMGCL    | -0.485718954 | 7.09E-05 | -0.204435066 | 0.08958  | -0.369719753 | 0.002256 |
| TNFSF15  | 1.062355114  | 7.18E-05 | 0.568296946  | 0.03421  | 0.648669515  | 0.015467 |
| STAT3    | 0.509262629  | 7.21E-05 | 0.40340431   | 0.00166  | 0.368502439  | 0.004065 |
| PHF5A    | -0.446125511 | 7.26E-05 | -0.121642249 | 0.26755  | -0.170753284 | 0.118494 |
| KSR1     | 0.844941558  | 7.30E-05 | 0.100756396  | 0.63742  | 0.33974593   | 0.111434 |
| MOB3A    | 0.59946299   | 7.32E-05 | 0.006099704  | 0.96818  | 0.149688798  | 0.324697 |

|            |              |          |              |          |              |          |
|------------|--------------|----------|--------------|----------|--------------|----------|
| TLN1       | 0.540761799  | 7.36E-05 | 0.057201372  | 0.67501  | 0.363519696  | 0.007681 |
| FANCI      | -0.54591367  | 7.50E-05 | -0.263055317 | 0.05516  | -0.299433056 | 0.02878  |
| IFI16      | 1.090389154  | 7.56E-05 | 1.083178288  | 8.38E-05 | 0.878157103  | 0.001432 |
| PATL1      | 0.49841503   | 7.61E-05 | -0.035805984 | 0.77843  | 0.066174362  | 0.601114 |
| EFR3A      | -0.294340242 | 7.68E-05 | -0.017905216 | 0.8076   | -0.126377638 | 0.086503 |
| RC3H1      | 0.561592978  | 7.71E-05 | 0.181595626  | 0.20103  | 0.60089838   | 2.26E-05 |
| MAPK7      | 0.791884036  | 7.78E-05 | 0.489142818  | 0.01507  | 0.693555845  | 0.000548 |
| KIAA1147   | -0.33337689  | 7.80E-05 | -0.06189698  | 0.45742  | -0.258007412 | 0.002026 |
| HNRNPA3    | 0.527197217  | 7.86E-05 | -0.199669039 | 0.13519  | 0.129472979  | 0.332149 |
| MZT1       | -0.539416565 | 7.86E-05 | -0.069539787 | 0.59845  | -0.12976126  | 0.325849 |
| ANAPC16    | -0.434726165 | 7.89E-05 | -0.307035743 | 0.00489  | -0.27855565  | 0.010639 |
| CHD1L      | -0.432653739 | 7.96E-05 | -0.230119402 | 0.03454  | -0.136766988 | 0.207275 |
| RHBDD2     | 0.491524325  | 7.98E-05 | 0.095397991  | 0.44555  | 0.190281722  | 0.128261 |
| FMO5       | -0.714956778 | 8.11E-05 | -0.575007535 | 0.00139  | -0.679413454 | 0.000164 |
| LRRCC1     | -0.71200343  | 8.11E-05 | -0.689544913 | 0.00012  | -0.281729996 | 0.113897 |
| COX11      | -0.368194271 | 8.13E-05 | -0.346646792 | 0.00017  | -0.326155354 | 0.000399 |
| PKD1       | 0.69559477   | 8.19E-05 | 0.040652563  | 0.81847  | 0.077590497  | 0.661503 |
| DC1S5-TXN1 | -1.035946307 | 8.22E-05 | -0.351574461 | 0.17991  | -0.655303499 | 0.012505 |
| MTATP6P1   | 1.261052453  | 8.23E-05 | 0.51476323   | 0.1102   | 0.309000135  | 0.338715 |
| GATM       | -0.74590676  | 8.27E-05 | -0.555110306 | 0.00332  | -0.726049493 | 0.000124 |
| ZKSCAN1    | -0.432432693 | 8.28E-05 | -0.270159996 | 0.01328  | -0.30416102  | 0.0054   |
| B3GNT2     | 0.532258636  | 8.36E-05 | 0.950149706  | 1.37E-12 | 0.765911876  | 1.18E-08 |
| P11-958N24 | 1.722030103  | 8.44E-05 | 1.07864416   | 0.01488  | 0.910624268  | 0.038545 |
| ELL        | 0.674624596  | 8.54E-05 | 0.141382297  | 0.41072  | 0.241665306  | 0.159846 |
| TMEM139    | 0.873750433  | 8.61E-05 | 0.993544106  | 7.07E-06 | 0.553609764  | 0.013087 |
| CHMP4B     | 0.319438031  | 8.71E-05 | 0.282104957  | 0.0005   | 0.300092801  | 0.000204 |
| IGLON5     | 1.025271115  | 8.70E-05 | -0.132594109 | 0.62311  | 0.409918454  | 0.120406 |
| CDC5L      | -0.267457725 | 8.74E-05 | -0.173320621 | 0.01034  | 0.018006494  | 0.788613 |
| YEATS4     | -0.462182617 | 8.73E-05 | -0.274420387 | 0.01694  | -0.113896588 | 0.317032 |
| DHRS7B     | -0.470900842 | 8.84E-05 | -0.061192153 | 0.60165  | -0.21362379  | 0.068887 |
| RPS27A     | -0.493600357 | 8.89E-05 | -0.174400292 | 0.16572  | -0.241411525 | 0.055034 |
| LETM2      | 1.007998298  | 9.05E-05 | 0.696216687  | 0.00665  | 0.728596921  | 0.004564 |
| PSEN1      | 0.349509391  | 9.06E-05 | 0.28508523   | 0.00138  | 0.301959288  | 0.00069  |
| DCP1A      | 0.724784169  | 9.08E-05 | 0.369800949  | 0.04836  | 0.368480893  | 0.047271 |
| ACN9       | -0.697188799 | 9.14E-05 | -0.395782181 | 0.02275  | -0.552945375 | 0.001555 |
| C1orf112   | -0.558098438 | 9.13E-05 | -0.284506223 | 0.04378  | -0.125632333 | 0.371128 |
| NPTN       | 0.356576522  | 9.16E-05 | 0.120418479  | 0.18546  | 0.21862896   | 0.01619  |
| AAK1       | 0.69996484   | 9.23E-05 | 0.432744391  | 0.01641  | 0.301647336  | 0.093889 |
| ABCE1      | -0.477057804 | 9.37E-05 | -0.185324806 | 0.1277   | -0.247736283 | 0.041599 |
| CENPM      | -0.861795492 | 9.36E-05 | -0.558647447 | 0.00913  | -0.67609967  | 0.001675 |
| NHLRC3     | -0.44204925  | 9.47E-05 | -0.20379602  | 0.06966  | -0.292104726 | 0.009149 |
| EMP3       | 0.617440695  | 9.48E-05 | 0.180539287  | 0.25463  | 0.531439763  | 0.000762 |
| FASTKD2    | -0.435605262 | 9.54E-05 | -0.228586005 | 0.03854  | -0.224119499 | 0.042127 |
| RPS15A     | -0.420170694 | 9.59E-05 | -0.202090901 | 0.06042  | -0.195517724 | 0.06924  |
| PPP1CC     | -0.29731672  | 9.62E-05 | -0.163734351 | 0.03104  | -0.076918983 | 0.310428 |
| MCM2       | -0.623737957 | 9.74E-05 | -0.476570715 | 0.00283  | -0.542557508 | 0.000672 |
| MEN1       | 0.395510047  | 9.87E-05 | 0.177734381  | 0.08165  | 0.182756754  | 0.071664 |

|            |              |          |              |          |              |          |
|------------|--------------|----------|--------------|----------|--------------|----------|
| NFKB1      | 0.792042761  | 9.99E-05 | 0.430932721  | 0.03444  | 0.92331496   | 5.61E-06 |
| SERPING1   | 0.858146314  | 0.0001   | 0.559845483  | 0.01126  | 0.557078901  | 0.011552 |
| DHFR       | -0.667348598 | 0.000101 | -0.400401268 | 0.0193   | -0.357233855 | 0.036767 |
| FBR5       | 0.640860622  | 0.000101 | 0.307601973  | 0.06314  | 0.264527096  | 0.110372 |
| LGR5       | -1.723171916 | 0.000102 | -0.919726775 | 0.03693  | -1.89368787  | 2.03E-05 |
| KIF20B     | -0.573966426 | 0.000103 | -0.224600416 | 0.1265   | -0.092281822 | 0.529524 |
| CDC42EP2   | 0.632788347  | 0.000104 | 0.503013814  | 0.00201  | 0.413660905  | 0.011103 |
| PDCD6IP    | 0.365819157  | 0.000104 | 0.246164242  | 0.00892  | 0.397715151  | 2.37E-05 |
| MTMR8      | -0.987652552 | 0.000105 | -0.301445184 | 0.2233   | -0.933679903 | 0.000197 |
| RPS23      | -0.526872373 | 0.000106 | -0.228205723 | 0.09303  | -0.265118705 | 0.051015 |
| TNF        | 4.563542268  | 0.000107 | 4.108541449  | 0.00063  | 4.796779311  | 3.93E-05 |
| SUPT6H     | 0.308037662  | 0.000108 | 0.168777446  | 0.03376  | 0.25109948   | 0.001557 |
| TBC1D31    | -0.520027289 | 0.000109 | -0.262429428 | 0.04575  | -0.189220212 | 0.147115 |
| CMBL       | -0.883717486 | 0.00011  | -0.606386023 | 0.00746  | -0.885112689 | 0.0001   |
| ANGPTL2    | 0.863120195  | 0.00011  | 0.63752788   | 0.00439  | 0.792523841  | 0.000377 |
| GIN52      | -0.795575443 | 0.00011  | -0.36542317  | 0.07335  | -0.473887609 | 0.020173 |
| FERMT2     | 0.712126409  | 0.000112 | 0.490436307  | 0.00778  | 0.880640596  | 1.72E-06 |
| CNBP       | -0.30621875  | 0.000112 | -0.222072441 | 0.00494  | -0.202761799 | 0.010222 |
| COL9A2     | 1.055109792  | 0.000112 | 1.353625613  | 6.23E-07 | 0.969372245  | 0.000374 |
| TSPAN6     | -0.368055976 | 0.000112 | -0.184555595 | 0.05091  | -0.239429703 | 0.011333 |
| EFCAB3     | 1.515319674  | 0.000113 | 0.940583169  | 0.01883  | 1.131849227  | 0.004175 |
| RPS14      | -0.489480106 | 0.000113 | -0.319732142 | 0.01161  | -0.323590268 | 0.010632 |
| FAF1       | -0.476600849 | 0.000113 | -0.328521977 | 0.00736  | -0.281772571 | 0.021314 |
| C14orf2    | -0.396778195 | 0.000114 | -0.198869862 | 0.05144  | -0.283871704 | 0.005373 |
| RPS27      | -0.447488322 | 0.000114 | -0.246079072 | 0.03372  | -0.264041466 | 0.022699 |
| ROBO1      | 0.493956503  | 0.000115 | 0.325659257  | 0.01098  | 0.526639612  | 3.84E-05 |
| MRPL16     | -0.427604178 | 0.000116 | -0.191486853 | 0.07818  | -0.185081719 | 0.088066 |
| PHKA1      | -0.635734849 | 0.000117 | -0.39362594  | 0.01529  | -0.343503225 | 0.033654 |
| PHLPP2     | 0.624504489  | 0.000117 | 0.365339443  | 0.02413  | 0.389148077  | 0.015977 |
| RNY4P13    | -1.212954904 | 0.000117 | 0.323369353  | 0.23797  | -0.167706443 | 0.550211 |
| ASF1A      | -0.434428377 | 0.000117 | -0.06900349  | 0.53145  | -0.138496281 | 0.208984 |
| CH25H      | 1.770810819  | 0.000118 | 1.013056066  | 0.02903  | 0.831882801  | 0.07373  |
| ANTXR1     | 0.770173786  | 0.000119 | 0.48977245   | 0.01445  | 0.429151561  | 0.032058 |
| IFITM2     | 0.676774275  | 0.000119 | 0.345104642  | 0.0499   | 0.363479258  | 0.038841 |
| AC040977.1 | 0.648697377  | 0.00012  | 0.24659349   | 0.14513  | 0.208410177  | 0.218091 |
| GNA15      | 1.742006319  | 0.00012  | 1.989092197  | 1.07E-05 | 1.606546588  | 0.000387 |
| PTPRK      | 0.344339919  | 0.00012  | 0.335347909  | 0.00017  | 0.258942137  | 0.003715 |
| TRAPPC2L   | -0.470927216 | 0.00012  | -0.145947985 | 0.22296  | -0.420626473 | 0.000489 |
| BEND4      | 3.071026386  | 0.000121 | 2.76178368   | 0.00056  | 2.87170842   | 0.000321 |
| REXO1      | 0.940475062  | 0.000122 | 0.202406227  | 0.40963  | 0.412549804  | 0.0932   |
| STK35      | 0.276886791  | 0.000123 | -0.050975035 | 0.48324  | 0.033114518  | 0.646057 |
| C9orf114   | -0.583732301 | 0.000125 | -0.335163783 | 0.02643  | -0.586575384 | 0.000102 |
| CRNKL1     | -0.464749473 | 0.000125 | -0.151316854 | 0.20777  | -0.11904256  | 0.320416 |
| LRCH4      | 0.762175826  | 0.000125 | 0.104502199  | 0.60098  | 0.135307996  | 0.499838 |
| DDX39B     | 0.328936526  | 0.000126 | 0.121540682  | 0.1565   | 0.355409832  | 3.27E-05 |
| IER3IP1    | -0.4604589   | 0.000126 | -0.063339094 | 0.59433  | -0.121112101 | 0.309195 |
| CEP85L     | -0.555216012 | 0.000128 | -0.548508385 | 0.00015  | -0.297547905 | 0.039229 |



|          |              |          |              |          |              |          |
|----------|--------------|----------|--------------|----------|--------------|----------|
| FAM189B  | 0.72053746   | 0.000128 | 0.15438091   | 0.4167   | 0.013251283  | 0.944669 |
| MSH6     | -0.489221291 | 0.000128 | -0.356724332 | 0.00511  | -0.130879717 | 0.303781 |
| TFEB     | 0.756198207  | 0.000128 | 0.803383068  | 3.60E-05 | 0.919688695  | 2.86E-06 |
| ADTRP    | 1.575744781  | 0.000129 | 2.27394537   | 1.34E-08 | 0.943143897  | 0.023274 |
| ARHGAP5  | -0.4097401   | 0.000129 | -0.146170845 | 0.1713   | -0.291744385 | 0.006341 |
| TK1      | -0.664777248 | 0.00013  | -0.531307332 | 0.00209  | -0.564380516 | 0.001083 |
| FBXL19   | 0.712817747  | 0.000131 | 0.214904141  | 0.24916  | 0.102943218  | 0.581228 |
| PFN2     | -0.312717746 | 0.000131 | 0.033880435  | 0.67619  | -0.007114728 | 0.930112 |
| TUBB2B   | 1.583278812  | 0.000131 | 1.304209835  | 0.00164  | 1.107058908  | 0.007546 |
| PML      | 0.676986572  | 0.000131 | 0.061101011  | 0.73181  | 0.073860865  | 0.679052 |
| NUP155   | -0.409467657 | 0.000133 | -0.39766106  | 0.0002   | -0.287566742 | 0.007023 |
| GRTP1    | -0.817082805 | 0.000133 | -0.529388029 | 0.01154  | -0.827620487 | 9.66E-05 |
| ADRM1    | 0.422925598  | 0.000134 | 0.236870471  | 0.03247  | 0.110805513  | 0.318051 |
| ALG10B   | -0.395884954 | 0.000134 | -0.256276844 | 0.01238  | -0.181716337 | 0.075853 |
| RAB1A    | 0.338055484  | 0.000135 | 0.245829312  | 0.0054   | 0.226480712  | 0.010344 |
| NRBP2    | 0.549329218  | 0.000136 | 0.121468016  | 0.4038   | 0.19086937   | 0.181845 |
| TMEM184B | 0.565550162  | 0.000136 | 0.091438104  | 0.53746  | 0.285379423  | 0.054155 |
| FLII     | 0.472390002  | 0.000137 | 0.235473758  | 0.05711  | 0.270290006  | 0.028987 |
| OSTC     | -0.436612503 | 0.000137 | -0.058460857 | 0.60738  | -0.258875869 | 0.022997 |
| EIF4G2   | 0.577140685  | 0.000138 | 0.244176758  | 0.10676  | 0.465568505  | 0.0021   |
| PRRC2B   | 0.469012967  | 0.000138 | 0.099017439  | 0.42146  | 0.062640839  | 0.610853 |
| ARHGEF28 | -0.954990541 | 0.000138 | -0.430807467 | 0.08452  | -0.883205828 | 0.00041  |
| ALDH1A1  | -0.685190796 | 0.00014  | -0.465517051 | 0.00963  | -0.455963041 | 0.011213 |
| AP3D1    | 0.439092291  | 0.00014  | 0.169411533  | 0.14164  | 0.237313233  | 0.039488 |
| DUSP7    | 0.653117336  | 0.00014  | 0.137854761  | 0.42965  | -0.079000222 | 0.653749 |
| MYEOV2   | -0.563234416 | 0.00014  | -0.045664393 | 0.7477   | -0.468379251 | 0.001202 |
| PSMC4    | 0.461329431  | 0.000141 | 0.459956837  | 0.00014  | 0.438647306  | 0.000281 |
| CENPQ    | -0.654805254 | 0.000144 | -0.248286511 | 0.1344   | -0.182172339 | 0.268888 |
| MTRF1    | -0.533896695 | 0.000146 | -0.26467346  | 0.05503  | -0.210182322 | 0.125409 |
| STYXL1   | -0.436967437 | 0.000146 | -0.204230125 | 0.06706  | -0.41790202  | 0.000196 |
| PPAT     | -0.564977338 | 0.000148 | -0.320927243 | 0.03008  | -0.226959291 | 0.124545 |
| GPX2     | 0.789934092  | 0.000148 | 0.635929107  | 0.00225  | 0.770184334  | 0.000215 |
| TJP1     | 0.501058057  | 0.000148 | 0.113730685  | 0.38935  | 0.335156496  | 0.011048 |
| KNTC1    | -0.511098115 | 0.00015  | -0.299091566 | 0.02585  | -0.162002855 | 0.2267   |
| SSBP1    | -0.318462741 | 0.00015  | 0.066036104  | 0.42233  | -0.010022783 | 0.903028 |
| RNF38    | 0.603239899  | 0.000151 | 0.146187774  | 0.35897  | 0.383301764  | 0.015801 |
| RPE      | -0.380272396 | 0.00015  | -0.09911197  | 0.31764  | -0.247357111 | 0.012795 |
| CIZ1     | 0.480729878  | 0.000151 | 0.046588695  | 0.7145   | 0.205524113  | 0.105289 |
| MTHFS    | -0.717252971 | 0.000152 | -0.293199733 | 0.11495  | -0.640905746 | 0.000621 |
| PLK4     | -0.593638191 | 0.000152 | -0.34150845  | 0.02783  | 0.023039693  | 0.881599 |
| PRTFDC1  | -0.714140414 | 0.000154 | -0.250348355 | 0.17678  | -0.252779169 | 0.170185 |
| ETS1     | 0.582635316  | 0.000155 | 0.344358825  | 0.02541  | 0.389696422  | 0.011317 |
| HLA-DQB1 | 1.521710333  | 0.000155 | 0.907188378  | 0.02451  | 0.43144161   | 0.286875 |
| SPRR1B   | 3.559524678  | 0.000157 | 4.31917021   | 3.59E-06 | 2.819782917  | 0.003    |
| NINJ1    | 0.81099563   | 0.000157 | 0.372774285  | 0.08331  | 0.498156335  | 0.020381 |
| NUDCD2   | -0.546957874 | 0.000158 | -0.214902005 | 0.13536  | -0.2394982   | 0.095507 |
| PHGDH    | -0.432385335 | 0.000158 | -0.310702074 | 0.00633  | -0.358406357 | 0.001634 |

|              |              |          |              |          |              |          |
|--------------|--------------|----------|--------------|----------|--------------|----------|
| MT-CYB       | 0.907656998  | 0.00016  | 0.133845949  | 0.57799  | -0.001297218 | 0.995698 |
| MTND4P12     | 0.970833217  | 0.00016  | 0.085479192  | 0.74105  | 0.155190925  | 0.548053 |
| PTBP1        | 0.485991881  | 0.00016  | 0.056932253  | 0.65834  | 0.118674285  | 0.356523 |
| STX8         | -0.416111357 | 0.00016  | -0.283433596 | 0.00866  | -0.112743926 | 0.291038 |
| SARNP        | -0.35829512  | 0.000161 | -0.141019285 | 0.13181  | 0.111961729  | 0.22735  |
| JUP          | 0.617846066  | 0.000161 | 0.486553899  | 0.00296  | 0.276065473  | 0.091856 |
| METTTL12     | -0.888831962 | 0.000162 | 0.284326438  | 0.22139  | -0.097256094 | 0.6766   |
| WASF1        | 0.714689977  | 0.000165 | 0.175197581  | 0.35976  | 0.527451506  | 0.005268 |
| IRAK1BP1     | -0.831158769 | 0.000166 | -0.116678196 | 0.59004  | -0.203022329 | 0.349589 |
| AREL1        | 0.437589831  | 0.000166 | 0.196979446  | 0.08927  | 0.318364043  | 0.005933 |
| RPS4XP22     | -0.866294083 | 0.000166 | -0.142252999 | 0.50425  | -0.219049678 | 0.304299 |
| COX15        | -0.392163429 | 0.000168 | -0.122510244 | 0.23403  | -0.279500997 | 0.006814 |
| ALPK3        | 0.688783507  | 0.000168 | 0.489467029  | 0.00752  | 0.478110743  | 0.009033 |
| EEF1A1P4     | -0.753520843 | 0.000169 | -0.119958893 | 0.51944  | -0.357398485 | 0.058251 |
| HDAC7        | 0.657740043  | 0.000169 | 0.376131297  | 0.03155  | 0.421536147  | 0.015856 |
| SENP6        | -0.254066373 | 0.00017  | -0.07750865  | 0.24798  | -0.016938982 | 0.800251 |
| ZEB2         | 1.014788304  | 0.000171 | 0.482130096  | 0.07456  | 0.836671031  | 0.001935 |
| PAIP2B       | -0.46593349  | 0.000174 | -0.320535345 | 0.00861  | -0.296251903 | 0.014792 |
| CENPE        | -0.843263619 | 0.000174 | -0.377858785 | 0.09203  | -0.10166749  | 0.650133 |
| PI4KB        | 0.437977633  | 0.000175 | 0.196550866  | 0.0914   | 0.243911688  | 0.036139 |
| C7orf43      | 0.601983242  | 0.000175 | 0.298529904  | 0.0636   | 0.538131728  | 0.000837 |
| DEK          | -0.504464174 | 0.000175 | -0.243777211 | 0.06913  | -0.064996935 | 0.627809 |
| AC004057.1   | 1.480206383  | 0.000176 | 0.905389494  | 0.02184  | 1.208425847  | 0.002199 |
| ZNF703       | 0.687048039  | 0.000176 | -0.272394996 | 0.1522   | -0.083192038 | 0.657447 |
| RP11-762I7.1 | 1.357839369  | 0.000177 | 0.875902115  | 0.01598  | 0.607559633  | 0.095495 |
| NDRG4        | 0.879471857  | 0.000177 | 0.346613329  | 0.14083  | 0.525916376  | 0.023884 |
| FUT2         | 0.603213527  | 0.000177 | 0.721501727  | 7.01E-06 | 0.368703322  | 0.021883 |
| TUFM         | -0.575193848 | 0.000178 | -0.208335174 | 0.17373  | -0.43234694  | 0.004781 |
| IGDCC4       | 0.903894495  | 0.000179 | 0.343194245  | 0.15626  | 0.422530836  | 0.080917 |
| C6orf211     | -0.412660027 | 0.000182 | -0.133990657 | 0.21894  | -0.138971947 | 0.201331 |
| TD-2005D20   | -2.475820074 | 0.00018  | -1.012753087 | 0.06774  | -1.878815628 | 0.001576 |
| HIPK1        | 0.362057333  | 0.000181 | 0.127052294  | 0.18835  | 0.197959985  | 0.040292 |
| LSM3         | -0.445050414 | 0.000182 | -0.186194521 | 0.11312  | 0.013156528  | 0.9104   |
| MAPKAPK2     | 0.285553194  | 0.000181 | 0.198863966  | 0.00883  | 0.160505716  | 0.034614 |
| PSPC1        | -0.555659533 | 0.000181 | -0.18576037  | 0.20505  | 0.015239976  | 0.916832 |
| RPL31        | -0.470007451 | 0.000182 | -0.208799482 | 0.09611  | -0.341435319 | 0.006511 |
| SH2B3        | 0.828173414  | 0.000182 | 0.662039667  | 0.00278  | 0.62734896   | 0.004543 |
| SUSD4        | -1.227370509 | 0.000181 | 0.420222147  | 0.18106  | -1.489203083 | 6.65E-06 |
| ZFAND1       | -0.479845236 | 0.000182 | -0.109160877 | 0.38885  | -0.163628111 | 0.195754 |
| CLCN6        | 0.606380192  | 0.000183 | -0.065872674 | 0.68679  | 0.396002183  | 0.014609 |
| ELMO2        | 0.497037262  | 0.000184 | 0.380969526  | 0.004    | 0.426968379  | 0.001232 |
| FABP5        | -0.668798467 | 0.000184 | -0.529262639 | 0.00301  | -0.415649802 | 0.019674 |
| RPA3         | -0.639352377 | 0.000185 | -0.364333922 | 0.02899  | -0.415568318 | 0.012934 |
| STEAP3       | -0.895211679 | 0.000185 | -0.563329502 | 0.01805  | -0.955651255 | 6.34E-05 |
| TMEM259      | 0.412313557  | 0.000185 | 0.102021264  | 0.35553  | 0.198831306  | 0.071739 |
| EPRS         | -0.454523014 | 0.000189 | -0.02386538  | 0.84413  | -0.266514575 | 0.028194 |
| MFHAS1       | 0.555820091  | 0.00019  | 0.264313507  | 0.07644  | 0.384995904  | 0.009628 |

|            |              |          |              |          |              |          |
|------------|--------------|----------|--------------|----------|--------------|----------|
| SP110      | 0.68960074   | 0.00019  | 0.086818196  | 0.64228  | 0.427257938  | 0.020452 |
| RNF223     | -1.031189752 | 0.000191 | -0.548034367 | 0.04025  | -1.090902965 | 6.67E-05 |
| JARID2     | 0.418692301  | 0.000192 | 0.39317667   | 0.00044  | 0.424324631  | 0.000145 |
| RARS2      | -0.363969716 | 0.000194 | -0.101673478 | 0.29125  | -0.106172967 | 0.269808 |
| PRRC2A     | 0.456357563  | 0.000195 | 0.163407819  | 0.18252  | 0.207115471  | 0.091048 |
| P11-459D22 | -1.725836162 | 0.000195 | -0.838296042 | 0.04109  | -0.627189666 | 0.118019 |
| GJB6       | -2.51581248  | 0.000197 | -1.081438503 | 0.08084  | -3.688600929 | 9.78E-07 |
| NDUFAB1    | -0.471428337 | 0.000197 | -0.10621871  | 0.39432  | -0.103723171 | 0.405057 |
| DKK3       | -0.791796717 | 0.000199 | -0.248321216 | 0.23247  | -0.357331597 | 0.087677 |
| ATRAID     | -0.364412858 | 0.000199 | -0.242278226 | 0.01268  | -0.307210106 | 0.001587 |
| CASP5      | 2.111397195  | 0.000199 | 2.052654441  | 0.00029  | 1.937485033  | 0.000642 |
| ATAD1      | -0.356647763 | 0.000201 | -0.247073643 | 0.00958  | -0.221830546 | 0.019825 |
| NHSL2      | 1.277923856  | 0.000202 | 0.148764587  | 0.67476  | 0.546528946  | 0.116116 |
| EXOSC9     | -0.46802296  | 0.000203 | -0.226589839 | 0.06937  | -0.006372715 | 0.959026 |
| MATR3      | -0.315552027 | 0.000203 | -0.122940898 | 0.1471   | 0.015289892  | 0.856821 |
| NAT10      | -0.506160821 | 0.000203 | -0.398630149 | 0.00328  | -0.164551997 | 0.224416 |
| XPO1       | -0.329070409 | 0.000204 | -0.083192722 | 0.34677  | 0.014351098  | 0.871002 |
| SVIL       | 0.56580148   | 0.000205 | 0.338569914  | 0.02633  | 0.48854483   | 0.001336 |
| FANCF      | -0.451947992 | 0.000205 | -0.167629463 | 0.15797  | -0.244546056 | 0.039604 |
| TMED3      | -0.54476604  | 0.000206 | -0.242117473 | 0.09815  | -0.557184555 | 0.000144 |
| SULT1C2    | -1.189537067 | 0.000209 | -1.170893916 | 0.00026  | -1.277080555 | 6.70E-05 |
| FAT1       | 0.500451098  | 0.000211 | 0.341325399  | 0.01148  | 0.529637673  | 8.75E-05 |
| JTB        | -0.386160338 | 0.00021  | -0.081390127 | 0.42689  | -0.295012287 | 0.00414  |
| PLK3       | 0.794335596  | 0.00021  | 0.259133591  | 0.22912  | 0.425581272  | 0.047226 |
| SLC28A2    | -1.728652509 | 0.000211 | -0.279230512 | 0.54649  | -1.647711952 | 0.0004   |
| SMIM6      | -0.927706099 | 0.000211 | -0.458585936 | 0.06098  | -0.301864861 | 0.214575 |
| IMP3       | -0.438240221 | 0.000213 | -0.003010351 | 0.9792   | -0.155882459 | 0.178449 |
| MAP4K4     | 0.470161806  | 0.000213 | 0.338230663  | 0.00771  | 0.518804302  | 4.30E-05 |
| PIEZO2     | 0.591935904  | 0.000212 | 0.713790656  | 7.70E-06 | 0.530855222  | 0.000879 |
| TTC9       | 0.69266673   | 0.000213 | 0.702952385  | 0.00016  | 0.468008902  | 0.012323 |
| C1orf27    | -0.357114906 | 0.000213 | -0.05704206  | 0.54812  | -0.021143931 | 0.823127 |
| AL353671.3 | -1.415809973 | 0.000214 | -0.572523407 | 0.12179  | -0.394368772 | 0.284163 |
| PRDX3      | -0.454169014 | 0.000214 | -0.22264015  | 0.06841  | -0.286913235 | 0.018858 |
| C17orf62   | 0.434391514  | 0.000215 | 0.349705999  | 0.00286  | 0.275897586  | 0.018652 |
| P11-1220K2 | 1.547510961  | 0.000215 | 1.194901807  | 0.00428  | 0.841921475  | 0.044221 |
| IER5L      | 0.98221434   | 0.000215 | 0.404538763  | 0.12884  | 0.36589217   | 0.169521 |
| RASA1      | -0.321098145 | 0.000215 | 0.009389609  | 0.91307  | -0.166975337 | 0.052845 |
| PDLIM7     | 0.843803118  | 0.000216 | 0.312386866  | 0.17169  | 0.316166252  | 0.166541 |
| AGPS       | -0.461726228 | 0.000217 | -0.153610429 | 0.2165   | -0.302953153 | 0.014898 |
| ARHGAP17   | 0.539215198  | 0.000217 | 0.199847248  | 0.17111  | 0.558263976  | 0.000127 |
| GSK3A      | 0.549881557  | 0.000218 | 0.020730338  | 0.88954  | 0.292219838  | 0.049123 |
| UBR4       | 0.493011221  | 0.000219 | 0.244187111  | 0.06718  | 0.455783445  | 0.000633 |
| PLAT       | 0.962077717  | 0.000221 | 0.456806559  | 0.07954  | 0.672855049  | 0.009793 |
| COPG2      | -0.490615207 | 0.000222 | -0.158600014 | 0.22482  | -0.280964186 | 0.03186  |
| NOP58      | -0.402218833 | 0.000222 | -0.276553205 | 0.01066  | -0.070793843 | 0.511703 |
| RBSN1L     | -0.531532366 | 0.000224 | -0.197627005 | 0.16721  | -0.211361184 | 0.138872 |
| TESK1      | 0.571265595  | 0.000225 | 0.128490619  | 0.41085  | 0.354043466  | 0.022704 |

|             |              |          |              |          |              |          |
|-------------|--------------|----------|--------------|----------|--------------|----------|
| WDR76       | -0.857290961 | 0.000227 | -0.498348226 | 0.03086  | -0.548317911 | 0.017565 |
| SNX29P2     | 1.02031957   | 0.00023  | 0.278491729  | 0.33647  | 0.673645797  | 0.015606 |
| P11-155G14  | 1.325099223  | 0.000232 | 1.20409495   | 0.0008   | 1.380972601  | 0.000109 |
| TPM1        | 0.499834421  | 0.000232 | 0.306061822  | 0.02417  | 0.620008827  | 4.90E-06 |
| NBN         | -0.368020631 | 0.000233 | -0.131888864 | 0.1837   | 0.03987523   | 0.686948 |
| CDC34       | 0.4481459    | 0.000234 | 0.193192976  | 0.11312  | 0.130066213  | 0.28671  |
| ANXA10      | -0.872010815 | 0.000234 | -0.897449984 | 0.00015  | -0.987193028 | 3.10E-05 |
| NR1D1       | -1.92998094  | 0.000234 | -2.153587432 | 4.12E-05 | -2.129816814 | 4.81E-05 |
| SREBF2      | 0.454669504  | 0.000235 | -0.034496241 | 0.78069  | 0.117838532  | 0.340985 |
| ERI2        | -0.397718357 | 0.000236 | -0.224716942 | 0.03364  | -0.267532988 | 0.011271 |
| NIT2        | -0.547305181 | 0.000237 | -0.127130651 | 0.38952  | -0.199916517 | 0.175817 |
| DNHD1       | 0.812827864  | 0.000238 | 0.715546906  | 0.00124  | 0.427623611  | 0.053399 |
| KIRREL      | 0.794497176  | 0.000238 | 0.326035842  | 0.13178  | 0.544326702  | 0.011794 |
| RP11-257I8. | -0.782570591 | 0.000238 | 0.1466004    | 0.43534  | -0.320783471 | 0.10046  |
| TSG101      | 0.460340593  | 0.000241 | 0.216360958  | 0.08392  | 0.232636306  | 0.063075 |
| NACC2       | 0.441019253  | 0.000242 | 0.297371801  | 0.01317  | 0.271237475  | 0.02377  |
| PIGF        | -0.555393083 | 0.000243 | -0.282109243 | 0.05809  | -0.250703579 | 0.092162 |
| SPR         | -0.610537249 | 0.000243 | -0.15547989  | 0.3394   | -0.531652411 | 0.001221 |
| GTPBP8      | -0.515651276 | 0.000245 | -0.220726199 | 0.10405  | -0.22473035  | 0.096695 |
| MFSD1       | -0.460841648 | 0.000245 | -0.04260786  | 0.72977  | -0.3107537   | 0.012115 |
| MSH2        | -0.743585319 | 0.000244 | -0.373718843 | 0.06371  | -0.303856498 | 0.131279 |
| WBP1L       | 0.284913351  | 0.000245 | 0.356811768  | 3.60E-06 | 0.169159674  | 0.028746 |
| WWC2        | 0.495283099  | 0.000244 | 0.334799586  | 0.01323  | 0.440215408  | 0.001077 |
| NRG4        | -1.043052721 | 0.000246 | -0.366297412 | 0.18119  | -1.247539234 | 1.22E-05 |
| ICMT        | -0.39993773  | 0.000247 | -0.145992366 | 0.17861  | -0.274355606 | 0.011547 |
| EML5        | -1.229742308 | 0.000248 | -0.320673838 | 0.32263  | -0.117783194 | 0.714854 |
| PI4K2A      | 0.423787215  | 0.00025  | 0.131361514  | 0.25845  | 0.305458885  | 0.008053 |
| VPS36       | -0.358226566 | 0.00025  | -0.189768304 | 0.05094  | -0.0988961   | 0.307142 |
| PROX1       | 1.127016123  | 0.00025  | 1.291563341  | 2.62E-05 | 1.634121761  | 1.01E-07 |
| CHCHD1      | -0.530871311 | 0.000252 | -0.155713711 | 0.27118  | -0.24168134  | 0.087693 |
| KAZN        | 0.728430585  | 0.000253 | -0.090104616 | 0.6561   | 0.323156893  | 0.105612 |
| SH3PXD2A    | 0.485461332  | 0.000255 | 0.229802619  | 0.08342  | 0.158813919  | 0.231727 |
| CYP26B1     | 1.148643958  | 0.000256 | 0.534613424  | 0.09077  | 1.04912257   | 0.000823 |
| GALNT13     | -1.325425516 | 0.000256 | -0.803775746 | 0.02591  | -1.542531452 | 2.13E-05 |
| RPL37A      | -0.427265787 | 0.000256 | -0.179983818 | 0.12325  | -0.226274881 | 0.052652 |
| ZNF277      | -0.496824298 | 0.000258 | -0.065102972 | 0.62666  | -0.046890513 | 0.725774 |
| NDUFB10     | -0.372647033 | 0.000261 | -0.215387538 | 0.03235  | -0.195515635 | 0.051255 |
| SLC44A5     | -0.834934053 | 0.000261 | -0.102191587 | 0.63883  | -0.244474824 | 0.266906 |
| CDC25A      | -0.625953268 | 0.000263 | -0.355211304 | 0.03676  | -0.286904068 | 0.091411 |
| GPR37L1     | 1.02498485   | 0.000264 | 1.009545074  | 0.00029  | 0.814469137  | 0.003692 |
| PDHB        | -0.273843408 | 0.000265 | -0.035818826 | 0.62838  | -0.072778806 | 0.324869 |
| DCTN1       | 0.533688781  | 0.000266 | 0.138923007  | 0.34254  | 0.202259762  | 0.166766 |
| PTCD3       | -0.278532304 | 0.000268 | -0.14324837  | 0.05857  | -0.004679014 | 0.950623 |
| UGT8        | -0.674575735 | 0.000269 | -0.545336188 | 0.00317  | -0.516598576 | 0.005169 |
| MT-ATP8     | 1.235663135  | 0.00027  | 0.799958004  | 0.01853  | 0.4027334    | 0.236998 |
| ANO9        | 0.641972679  | 0.000271 | 0.57856086   | 0.00096  | 0.519595184  | 0.003085 |
| PPP1R9A     | -0.392218851 | 0.000271 | -0.251220668 | 0.01906  | -0.236655026 | 0.027099 |

|           |              |          |              |          |              |          |
|-----------|--------------|----------|--------------|----------|--------------|----------|
| TCEB2     | -0.321513137 | 0.000272 | -0.019583166 | 0.82268  | -0.197009313 | 0.024456 |
| FRAT2     | -0.673866128 | 0.000272 | -0.521717039 | 0.00435  | -0.242449953 | 0.181057 |
| TROVE2    | -0.259580274 | 0.000274 | -0.067313497 | 0.34333  | -0.038733192 | 0.584741 |
| LINC00888 | -0.497133736 | 0.000275 | -0.075175379 | 0.56698  | -0.01750939  | 0.89253  |
| PTPLAD1   | -0.366937372 | 0.000282 | -0.280484084 | 0.00543  | -0.095988336 | 0.340783 |
| IHH       | -1.082669074 | 0.000284 | -0.562387375 | 0.05858  | -1.516068968 | 3.86E-07 |
| FHL3      | 0.68610946   | 0.000287 | 0.09680193   | 0.61106  | 0.198361163  | 0.296175 |
| SRSF10    | -0.304568397 | 0.000287 | -0.095803393 | 0.25214  | 0.043473731  | 0.602713 |
| TCEA3     | -1.045170736 | 0.000287 | -1.029495646 | 0.00032  | -1.379557219 | 1.99E-06 |
| ZCCHC11   | -0.37533842  | 0.000288 | -0.076636156 | 0.45739  | 0.005743032  | 0.955461 |
| CBL       | 0.446528819  | 0.00029  | 0.099599393  | 0.42008  | 0.230759725  | 0.060965 |
| FAM193A   | 0.488841601  | 0.000289 | 0.060463058  | 0.65518  | 0.073055229  | 0.588369 |
| SPINK1    | -0.828634329 | 0.00029  | -0.253789474 | 0.26687  | -0.5436121   | 0.017401 |
| RAD18     | -0.45499244  | 0.00029  | -0.344180129 | 0.00552  | -0.199026351 | 0.106264 |
| ODF3B     | 1.729695444  | 0.000292 | 1.731374014  | 0.00028  | 0.787373736  | 0.108267 |
| MOB1B     | -0.39230136  | 0.000296 | -0.182863519 | 0.08888  | -0.13111768  | 0.221144 |
| MTRNR2L4  | -1.015741274 | 0.000296 | -0.017641511 | 0.94908  | -0.544934363 | 0.049641 |
| RRM2      | -0.712334189 | 0.000297 | -0.468846812 | 0.017    | -0.459706031 | 0.019288 |
| ITGB8     | 0.721133524  | 0.0003   | 0.533562317  | 0.00746  | 0.445584556  | 0.025456 |
| MANEAL    | -1.11805415  | 0.000302 | -0.692340089 | 0.02112  | -1.046880858 | 0.000547 |
| MCAM      | 0.832154718  | 0.000302 | 0.394502189  | 0.08806  | 0.315886031  | 0.171145 |
| SF1       | 0.420102539  | 0.000302 | 0.078560314  | 0.50043  | 0.21940238   | 0.059193 |
| SNRPF     | -0.529743625 | 0.000304 | -0.214564802 | 0.13883  | -0.064946971 | 0.653227 |
| OAS1      | 0.654197309  | 0.000305 | 0.75916289   | 2.71E-05 | 0.497039555  | 0.006045 |
| SLC9A3    | 1.119281385  | 0.000306 | 1.015562048  | 0.00107  | 0.975403335  | 0.00163  |
| ARPC2     | 0.334625972  | 0.000307 | 0.254709586  | 0.00596  | 0.34508812   | 0.000193 |
| TRMT2B    | -0.429085534 | 0.000308 | -0.432911073 | 0.00023  | -0.554493076 | 2.53E-06 |
| SPCS3     | -0.27786027  | 0.000312 | -0.043348793 | 0.57208  | -0.075413394 | 0.325668 |
| GOPC      | -0.285278049 | 0.000313 | 0.064029208  | 0.41093  | 0.064796612  | 0.404756 |
| CASP3     | -0.376010928 | 0.000315 | 0.086249384  | 0.40157  | -0.040553269 | 0.693695 |
| HEG1      | 0.96105764   | 0.000317 | 0.797226046  | 0.00286  | 0.789179761  | 0.003139 |
| SPATA5    | -0.462283659 | 0.000318 | -0.422622885 | 0.00092  | -0.273733148 | 0.031251 |
| CENPT     | 0.692862801  | 0.000319 | 0.525596422  | 0.00623  | 0.900432904  | 2.46E-06 |
| TSEN15    | -0.415028288 | 0.00032  | -0.095462003 | 0.39734  | -0.149812077 | 0.183346 |
| ILK       | 0.423326594  | 0.000321 | 0.140810162  | 0.23121  | 0.34389506   | 0.003389 |
| SDHD      | -0.34597067  | 0.000321 | -0.186986237 | 0.04976  | -0.098050013 | 0.302012 |
| EIF2AK1   | -0.337007424 | 0.000322 | -0.266666423 | 0.00429  | -0.362778782 | 0.000103 |
| PBK       | -0.93783237  | 0.000322 | -0.27886717  | 0.27912  | -0.152220395 | 0.55393  |
| BEND3     | 0.794993772  | 0.000324 | 1.113395586  | 4.45E-07 | 0.53203165   | 0.01613  |
| ATG4C     | -0.918193401 | 0.000325 | -0.6227729   | 0.01327  | -0.510709497 | 0.041955 |
| SDC3      | 0.683299972  | 0.000326 | 0.307774059  | 0.10573  | 0.288634472  | 0.128925 |
| TADA1     | -0.385208868 | 0.000329 | -0.193029258 | 0.0653   | -0.116304344 | 0.262503 |
| PITPNA    | 0.395696802  | 0.000329 | 0.203960664  | 0.06424  | 0.307085104  | 0.005269 |
| TGM2      | 0.832848931  | 0.000331 | 0.377203396  | 0.10439  | 0.424293406  | 0.067636 |
| TEAD3     | 0.642428138  | 0.000332 | -0.076959056 | 0.66832  | 0.276266152  | 0.122573 |
| FAM20B    | -0.233888844 | 0.000332 | -0.097143211 | 0.13167  | -0.024149789 | 0.706733 |
| NQO1      | -0.632971649 | 0.000332 | -0.622131935 | 0.00042  | -0.369410813 | 0.035988 |

|            |              |          |              |         |              |          |
|------------|--------------|----------|--------------|---------|--------------|----------|
| CNTNAP1    | 0.808008745  | 0.000334 | 0.572457209  | 0.01117 | 0.521187903  | 0.020806 |
| SLC38A11   | -1.716045262 | 0.000334 | -0.686038038 | 0.13458 | -1.253687293 | 0.007182 |
| RMI2       | -0.763019866 | 0.000336 | -0.742171656 | 0.00044 | -0.533371263 | 0.010984 |
| NAV1       | 0.824317885  | 0.000337 | 0.263769565  | 0.25247 | 0.082749516  | 0.719825 |
| PPCS       | -0.427434137 | 0.000339 | -0.213340444 | 0.07136 | -0.397890323 | 0.000796 |
| RCAN1      | 0.937421385  | 0.00034  | 0.726278612  | 0.0055  | 1.243888701  | 1.90E-06 |
| GATAD2A    | 0.341845802  | 0.000341 | 0.076802439  | 0.42185 | 0.151869469  | 0.11188  |
| HSPB1      | 0.591446701  | 0.000341 | -0.009975615 | 0.95194 | 0.330073861  | 0.04573  |
| GTF2H3     | -0.466899956 | 0.000342 | -0.344797298 | 0.00736 | -0.286210976 | 0.026357 |
| FOCAD      | -0.481014452 | 0.000344 | -0.084179925 | 0.52906 | -0.15713322  | 0.239765 |
| MRPL1      | -0.57034944  | 0.000344 | -0.210135846 | 0.18006 | -0.322054728 | 0.040306 |
| POFUT1     | -0.461155911 | 0.000344 | -0.252615005 | 0.0489  | -0.409456604 | 0.001439 |
| PFDN5      | -0.308798381 | 0.000346 | -0.121923328 | 0.15521 | -0.064999078 | 0.447864 |
| SMIM19     | -0.611271517 | 0.000347 | -0.255192189 | 0.12894 | -0.223893095 | 0.182593 |
| DPYSL2     | 0.345257649  | 0.000349 | -0.132959351 | 0.169   | 0.153378829  | 0.111996 |
| PPA2       | -0.495407843 | 0.000349 | -0.284685624 | 0.03847 | -0.40898157  | 0.00298  |
| FAM46A     | -0.653527786 | 0.00035  | -0.353519266 | 0.05291 | -0.551575994 | 0.002533 |
| SERP1      | -0.412872209 | 0.000352 | -0.15851662  | 0.16906 | -0.217690406 | 0.058966 |
| SGIP1      | 0.866736096  | 0.000352 | 0.42303435   | 0.0824  | 0.53213782   | 0.028511 |
| NHP2       | -0.467643556 | 0.000355 | -0.248328771 | 0.05332 | -0.395933452 | 0.002129 |
| KIF24      | -0.559361315 | 0.000356 | -0.346184103 | 0.02453 | -0.159498813 | 0.296158 |
| POLR3B     | -0.492354406 | 0.00036  | 0.150831023  | 0.26758 | 0.026190914  | 0.847161 |
| NARG2      | -0.386459156 | 0.000361 | -0.089355526 | 0.40585 | -0.03593936  | 0.737689 |
| MCTS1      | -0.37733155  | 0.000365 | -0.164172636 | 0.11425 | -0.236210105 | 0.023227 |
| FN3KRP     | -0.393762477 | 0.000367 | -0.262455417 | 0.01513 | -0.128839241 | 0.229239 |
| SLC2A10    | -0.542949565 | 0.000367 | -0.395599684 | 0.00907 | -0.79054248  | 2.24E-07 |
| C14orf105  | -0.988287498 | 0.000368 | -0.669134225 | 0.01553 | -0.480896837 | 0.081661 |
| MGME1      | -0.535257713 | 0.000369 | -0.316160714 | 0.03226 | -0.386861709 | 0.008798 |
| MIDN       | 0.596773426  | 0.00037  | 0.161201814  | 0.33801 | 0.144972743  | 0.388564 |
| CYP2C18    | 0.995533749  | 0.000371 | 1.024370994  | 0.00025 | 0.9065892    | 0.001177 |
| BGLAP      | 2.136971622  | 0.000372 | 0.529010295  | 0.41244 | 1.104685023  | 0.074415 |
| PIAS3      | 0.433327898  | 0.000373 | -0.204283922 | 0.09656 | 0.142518197  | 0.243569 |
| LSM6       | -0.459878949 | 0.000376 | 0.065361017  | 0.60066 | -0.033465915 | 0.788097 |
| PLEKHA4    | 0.756729724  | 0.000375 | 0.319644009  | 0.13394 | 0.428332395  | 0.044332 |
| PLIN3      | 0.584900403  | 0.000376 | 0.302596906  | 0.06558 | 0.398107766  | 0.015357 |
| SIN3A      | 0.341315739  | 0.000375 | 0.087594998  | 0.36123 | 0.102093837  | 0.286123 |
| ATG9A      | 0.496390863  | 0.000378 | 0.291298033  | 0.03707 | 0.347672874  | 0.012753 |
| DDR1       | 0.425089217  | 0.000378 | 0.372007295  | 0.00185 | 0.275229094  | 0.021364 |
| DNAJC19    | -0.444910767 | 0.000378 | -0.204829857 | 0.09579 | -0.242108517 | 0.048711 |
| SLC44A3    | -0.672633766 | 0.000378 | -0.354247559 | 0.06029 | -0.765403391 | 5.17E-05 |
| P11-404P21 | 2.417771539  | 0.000379 | 1.50288328   | 0.02951 | 2.206471692  | 0.001174 |
| PLCE1      | -0.460978942 | 0.00038  | -0.308942471 | 0.01678 | -0.377292041 | 0.003519 |
| CAND1      | -0.327536738 | 0.000383 | -0.104743769 | 0.25514 | -0.026246363 | 0.775417 |
| SPATA6     | -0.653384779 | 0.000387 | -0.419827153 | 0.02142 | -0.491507139 | 0.007071 |
| LAMTOR4    | -0.446118786 | 0.000389 | -0.260388182 | 0.03389 | -0.360166284 | 0.003447 |
| PEX11A     | -0.705624193 | 0.000391 | -0.065006618 | 0.73743 | -0.151629889 | 0.4361   |
| TRIM16L    | -0.677100524 | 0.000391 | -0.536755917 | 0.00413 | -0.386548166 | 0.039162 |

|            |              |          |              |          |              |          |
|------------|--------------|----------|--------------|----------|--------------|----------|
| VPS53      | 0.572838825  | 0.000392 | 0.368045182  | 0.02269  | 0.127842045  | 0.428368 |
| HEMK1      | -0.55745917  | 0.000395 | -0.410260863 | 0.00879  | -0.544911594 | 0.000512 |
| SLC25A40   | -0.417569524 | 0.000396 | 6.35E-05     | 0.99956  | -0.135260734 | 0.242852 |
| LDHB       | -0.40875861  | 0.000399 | -0.345443058 | 0.00275  | -0.166825726 | 0.147978 |
| PIP5K1C    | 0.546378185  | 0.0004   | 0.145977606  | 0.34753  | 0.008846527  | 0.954683 |
| METTL15    | -0.405606523 | 0.000404 | -0.166131977 | 0.14219  | -0.222061344 | 0.048875 |
| SLC8B1     | 0.83407038   | 0.000406 | 0.447569581  | 0.05744  | 0.642200048  | 0.006253 |
| RAB35      | 0.449298471  | 0.000408 | 0.119627479  | 0.34672  | 0.245710584  | 0.052574 |
| E2F1       | -0.626938804 | 0.00041  | -0.640979665 | 0.00028  | -0.588155612 | 0.000826 |
| TUBB6      | 0.74079572   | 0.00041  | 0.370979709  | 0.07691  | 0.561074108  | 0.007415 |
| SAMM50     | -0.367456621 | 0.000411 | -0.080418854 | 0.43215  | -0.182192022 | 0.074484 |
| CNN2       | 0.47326361   | 0.000413 | 0.069910793  | 0.602    | 0.137357414  | 0.305312 |
| SP4        | -0.507365083 | 0.000413 | -0.404755511 | 0.00454  | -0.416670257 | 0.00339  |
| ACTR1A     | 0.323611204  | 0.000413 | 0.233780262  | 0.0106   | 0.32295954   | 0.0004   |
| COMMD8     | -0.590214975 | 0.000414 | -0.203188257 | 0.20972  | -0.331632992 | 0.041354 |
| P11-139J15 | -2.971671753 | 0.000415 | -0.209736485 | 0.75375  | 0.153145066  | 0.816813 |
| RPS8       | -0.404505023 | 0.000415 | -0.34044251  | 0.00296  | -0.236762892 | 0.038713 |
| HS3ST3B1   | 0.865566387  | 0.000417 | 0.241103042  | 0.33263  | 0.704885499  | 0.003944 |
| TNFAIP6    | 1.603998711  | 0.000418 | 1.866636922  | 3.64E-05 | 1.512960434  | 0.000852 |
| WDR33      | -0.336819871 | 0.00042  | -0.10702676  | 0.26043  | -0.027487862 | 0.772372 |
| GGH        | -0.604032756 | 0.000421 | -0.066282116 | 0.69554  | -0.047637439 | 0.778585 |
| BMP10      | 3.08945586   | 0.000423 | 2.394618498  | 0.00661  | 2.095803599  | 0.017892 |
| ZNF532     | 0.521662903  | 0.000424 | 0.174514986  | 0.23901  | 0.387036704  | 0.008887 |
| UQCRH      | -0.331673889 | 0.000425 | -0.156812556 | 0.09358  | -0.084734649 | 0.363946 |
| LTB4R      | 0.748003298  | 0.000426 | 0.528023335  | 0.01228  | 0.268005969  | 0.207329 |
| ALDH5A1    | -0.653291407 | 0.000428 | -0.392648906 | 0.03208  | -0.509210544 | 0.005558 |
| RIF1       | -0.252739818 | 0.000429 | -0.236971069 | 0.00092  | -0.084373737 | 0.236981 |
| ZRANB3     | -0.651451591 | 0.000432 | -0.489818091 | 0.00738  | -0.382690294 | 0.034953 |
| RPS6KA2    | 0.988373599  | 0.000433 | 0.676548272  | 0.01634  | 0.685080245  | 0.014862 |
| TTC13      | -0.599301212 | 0.000435 | -0.182168198 | 0.2806   | -0.012844049 | 0.939126 |
| METTL9     | -0.570598198 | 0.000436 | -0.05062822  | 0.75359  | -0.116841536 | 0.469314 |
| UHRF2      | -0.434182884 | 0.000437 | -0.223995474 | 0.06756  | -0.211249688 | 0.083839 |
| NIPSNAP1   | -0.405400662 | 0.000439 | -0.495833355 | 1.65E-05 | -0.344936043 | 0.002605 |
| PPP1R12C   | 0.513321197  | 0.000438 | 0.245787444  | 0.09297  | 0.341445697  | 0.019401 |
| SCNN1G     | -2.256484839 | 0.000438 | -1.816566379 | 0.0037   | -2.577232909 | 6.37E-05 |
| PIGK       | -0.406436417 | 0.00044  | -0.221521335 | 0.05109  | -0.232609165 | 0.040387 |
| ATM        | -0.431794367 | 0.000442 | -0.192154835 | 0.11688  | -0.019428438 | 0.873986 |
| ARL6       | -0.761906259 | 0.000444 | -0.436157436 | 0.03619  | -0.742000984 | 0.000433 |
| ZNF124     | -0.361575916 | 0.000445 | -0.273460297 | 0.00749  | -0.125693798 | 0.217478 |
| RPL7A      | -0.405927537 | 0.000446 | -0.242081679 | 0.03611  | -0.267275709 | 0.020674 |
| GPR107     | 0.385657798  | 0.000448 | 0.160914598  | 0.14314  | 0.238772549  | 0.02949  |
| P11-570P14 | -2.366793641 | 0.000451 | 0.15525967   | 0.77667  | -0.949987233 | 0.098218 |
| FANCM      | -0.607547131 | 0.000452 | -0.500534678 | 0.00345  | -0.420996096 | 0.013843 |
| NACA       | -0.367146049 | 0.000454 | -0.160246763 | 0.12541  | -0.146427549 | 0.161326 |
| TTC3       | -0.2688192   | 0.000455 | -0.103618094 | 0.17588  | -0.245363753 | 0.001353 |
| PMAIP1     | 0.98670473   | 0.000456 | 0.756575205  | 0.00715  | 0.913940027  | 0.001141 |
| HNRNPF     | -0.306114511 | 0.000456 | -0.137769746 | 0.11346  | -0.028854968 | 0.739943 |

|            |              |          |              |         |              |          |
|------------|--------------|----------|--------------|---------|--------------|----------|
| THOC7      | -0.35284874  | 0.000457 | -0.11103255  | 0.2615  | -0.0622282   | 0.528061 |
| ZNF24      | -0.263359283 | 0.000462 | -0.071765931 | 0.33649 | 0.104396021  | 0.160506 |
| NDUFB5     | -0.510982191 | 0.000462 | -0.21137703  | 0.14376 | -0.306478873 | 0.034305 |
| MYD88      | 0.700062696  | 0.000464 | 0.308464217  | 0.12443 | 0.308083725  | 0.124248 |
| NMNAT2     | 1.377697223  | 0.000464 | 1.13316406   | 0.00397 | 1.052021467  | 0.0075   |
| RALGPS1    | -0.660664881 | 0.000464 | -0.440765376 | 0.01879 | -0.515110925 | 0.00598  |
| RAB3D      | -0.574670297 | 0.000466 | -0.524141169 | 0.00137 | -0.566769608 | 0.000538 |
| TRIAP1     | -0.528579463 | 0.000467 | -0.329450958 | 0.02715 | -0.269840431 | 0.069433 |
| FAM173B    | -0.547408687 | 0.00047  | -0.268904853 | 0.07756 | -0.195387993 | 0.197457 |
| RNF145     | 0.374416824  | 0.000474 | 0.383647726  | 0.00033 | 0.5240899    | 9.13E-07 |
| PLCD1      | -0.66561032  | 0.000476 | -0.388534766 | 0.0394  | -0.470282716 | 0.012981 |
| BMF        | 0.655199561  | 0.000477 | 0.526643582  | 0.00481 | 0.299762597  | 0.109057 |
| HOXB4      | 0.94060957   | 0.000478 | 0.084191637  | 0.75802 | 0.530166089  | 0.049707 |
| PDP1       | 0.539543287  | 0.000478 | 0.584406975  | 0.00014 | 0.722682248  | 2.49E-06 |
| GEMIN5     | -0.395362776 | 0.000487 | -0.290364437 | 0.00973 | -0.129149952 | 0.247337 |
| GNPDA1     | -0.379685809 | 0.000491 | -0.212249736 | 0.04706 | -0.227606078 | 0.032895 |
| GPR108     | 0.478660258  | 0.000493 | 0.276327616  | 0.04396 | 0.370089825  | 0.006876 |
| ATP6V0D1   | 0.346148653  | 0.000493 | 0.151921493  | 0.12509 | 0.132168248  | 0.182753 |
| SPIRE1     | 0.893027358  | 0.000494 | 0.095224685  | 0.71488 | 0.863064924  | 0.000779 |
| CCL28      | 1.160352431  | 0.000495 | 1.205047455  | 0.00028 | 0.745458978  | 0.025767 |
| FUT9       | -1.845292927 | 0.000495 | -1.42933551  | 0.0069  | -2.336308731 | 1.06E-05 |
| EEF1A1P22  | -1.08411427  | 0.000496 | -0.620244391 | 0.0305  | -0.084308272 | 0.754945 |
| MRRF       | -0.448300007 | 0.000497 | -0.10711365  | 0.40272 | -0.135424625 | 0.289403 |
| SLC25A24   | -0.316824486 | 0.000497 | -0.21071958  | 0.02005 | -0.033250032 | 0.712953 |
| FARSB      | -0.392346876 | 0.000498 | -0.300792137 | 0.0072  | -0.154203285 | 0.166581 |
| RAB5B      | 0.220471441  | 0.000498 | 0.049655105  | 0.43346 | 0.164548214  | 0.009048 |
| NDFIP1     | -0.28919216  | 0.0005   | -0.092698563 | 0.25948 | -0.100828906 | 0.21951  |
| ERP29      | -0.461521477 | 0.000501 | -0.273927061 | 0.03833 | -0.36886244  | 0.005305 |
| LOXL2      | 0.778392259  | 0.000501 | 0.756126825  | 0.00072 | 0.3952155    | 0.077372 |
| RNF217     | 0.784811501  | 0.000502 | 0.150463259  | 0.50538 | 0.133444834  | 0.55437  |
| P11-583M2. | -2.219264838 | 0.000503 | -0.151464073 | 0.78728 | -1.154463932 | 0.047046 |
| BTBD19     | 0.566708855  | 0.000503 | 0.200967045  | 0.22135 | 0.125724244  | 0.443191 |
| GGT5       | 1.050728527  | 0.000504 | 0.509488081  | 0.09046 | 0.349888008  | 0.251193 |
| PET100     | -0.468559603 | 0.000505 | -0.062511157 | 0.63497 | -0.21867404  | 0.096904 |
| COA1       | -0.299767923 | 0.000507 | -0.191649567 | 0.02451 | -0.015470523 | 0.854773 |
| MLLT11     | 0.559830983  | 0.000507 | 0.121694619  | 0.45126 | 0.685248588  | 1.93E-05 |
| WNT9A      | 1.499092683  | 0.000507 | 1.360584881  | 0.00157 | 1.045747713  | 0.016671 |
| LYZ        | -1.155264706 | 0.00051  | -0.597741207 | 0.07214 | -0.98822708  | 0.00295  |
| SLAIN1     | -0.705406347 | 0.000511 | -0.435213331 | 0.03055 | -0.171547616 | 0.392745 |
| PSMD1      | 1.019698325  | 0.000513 | 0.832833616  | 0.0045  | 0.314378927  | 0.284241 |
| SCYL1      | 0.434089392  | 0.000514 | 0.176029735  | 0.15915 | 0.280060636  | 0.02488  |
| TMPRSS5    | -1.065525648 | 0.000514 | -0.93734512  | 0.00213 | -1.329348106 | 1.48E-05 |
| ANKRD18CF  | -1.178742638 | 0.000515 | -0.605386094 | 0.05262 | -0.942220228 | 0.003327 |
| C6orf48    | -0.41831838  | 0.000517 | -0.229173889 | 0.05559 | -0.309900544 | 0.009688 |
| STOX1      | -0.719928756 | 0.000522 | -0.585526964 | 0.00348 | -0.925481514 | 7.72E-06 |
| DCLK3      | 2.25948189   | 0.000524 | 1.42402067   | 0.02943 | 1.392562478  | 0.033349 |
| MGAT5      | -0.390371454 | 0.000524 | -0.198878487 | 0.07642 | -0.404353883 | 0.000323 |



|             |              |          |              |          |              |          |
|-------------|--------------|----------|--------------|----------|--------------|----------|
| TRIP10      | 0.430388836  | 0.000523 | 0.195543462  | 0.11587  | 0.263265815  | 0.033694 |
| CASP8AP2    | -0.340467393 | 0.000525 | -0.206555717 | 0.03344  | -0.113625428 | 0.240325 |
| EEF2K       | -0.517037575 | 0.000528 | -0.526396077 | 0.0004   | -0.673068935 | 6.12E-06 |
| THRA        | -0.406730131 | 0.000528 | -0.449115429 | 0.00012  | -0.745690924 | 2.30E-10 |
| NAMPT       | 1.099984798  | 0.000529 | 0.851575861  | 0.0073   | 1.133625621  | 0.000355 |
| FUNDC1      | -0.461671822 | 0.00053  | -0.036417618 | 0.77893  | -0.0493885   | 0.703109 |
| MED25       | 0.52045506   | 0.000533 | 0.004727211  | 0.97521  | 0.118404239  | 0.435066 |
| SAPCD2      | -0.815314753 | 0.000537 | -0.353691709 | 0.12926  | -0.799944968 | 0.000646 |
| GLI2        | 0.863790474  | 0.000538 | 0.040631198  | 0.87163  | 0.197716918  | 0.429561 |
| RABGGTB     | -0.304975583 | 0.000541 | -0.167041873 | 0.05629  | 0.011982148  | 0.890667 |
| CHEK1       | -0.651797848 | 0.000544 | -0.41543179  | 0.02681  | -0.359154075 | 0.055367 |
| CD248       | 0.717228365  | 0.000545 | -0.180785963 | 0.38672  | -0.071981016 | 0.729895 |
| GCSH        | -0.526898376 | 0.000548 | -0.459058317 | 0.00237  | -0.22346681  | 0.137293 |
| TGFBR1      | 0.457969825  | 0.000548 | 0.413958042  | 0.00174  | 0.449498943  | 0.000672 |
| FKBP3       | -0.357671551 | 0.00055  | -0.153876099 | 0.1328   | -0.082236671 | 0.420553 |
| RBBP7       | -0.251379008 | 0.000551 | -0.109489773 | 0.13019  | -0.021339274 | 0.76798  |
| DBF4        | -0.413619173 | 0.000554 | 0.027498097  | 0.81508  | 0.057231792  | 0.625506 |
| ELP4        | -0.377618552 | 0.000556 | -0.220599947 | 0.03847  | -0.130312961 | 0.216586 |
| HADHB       | -0.252526312 | 0.000555 | -0.153429814 | 0.03366  | -0.160681246 | 0.026187 |
| HM13        | 0.322751539  | 0.000555 | 0.047260271  | 0.61378  | 0.328622621  | 0.000427 |
| NXN         | 0.786835169  | 0.000555 | 0.057617969  | 0.80116  | 0.54089642   | 0.017601 |
| OGFR        | 0.49959119   | 0.000555 | 0.351565625  | 0.01507  | 0.243738575  | 0.091649 |
| OMA1        | -0.666067953 | 0.000557 | -0.148928822 | 0.4334   | -0.262825487 | 0.169027 |
| TP53        | 0.82363525   | 0.000557 | 0.330268612  | 0.1665   | 0.638404853  | 0.007401 |
| RUSC2       | 0.567734244  | 0.000557 | -0.024484297 | 0.88246  | 0.142165147  | 0.38961  |
| MCPH1       | -0.36569832  | 0.00056  | -0.12732644  | 0.22518  | 0.012884701  | 0.901724 |
| C8orf33     | -0.512820086 | 0.000561 | -0.234186553 | 0.11212  | -0.267356782 | 0.069492 |
| DAB2        | 0.908383361  | 0.000566 | 0.200477919  | 0.4487   | 0.545140586  | 0.038609 |
| EHHADH      | -0.831080796 | 0.000567 | -0.446495782 | 0.06168  | -0.680109408 | 0.004743 |
| CCT6A       | -0.339015978 | 0.000568 | -0.151919571 | 0.12144  | -0.103223767 | 0.292659 |
| PAQR6       | 0.865569155  | 0.000568 | 0.3462159    | 0.17067  | 0.51744714   | 0.039947 |
| SMIM20      | -0.479070406 | 0.000572 | -0.350888612 | 0.0106   | -0.569710843 | 3.65E-05 |
| TANK        | 0.407180855  | 0.000575 | 0.486994889  | 3.50E-05 | 0.623758742  | 1.07E-07 |
| SNCAIP      | 0.848846734  | 0.000576 | 0.343491517  | 0.16473  | 0.585091757  | 0.017655 |
| GPR114      | -1.260470349 | 0.000583 | -0.999922411 | 0.00581  | -1.401837945 | 0.000115 |
| TMEM109     | -0.474628381 | 0.000584 | -0.198639279 | 0.14698  | -0.440911061 | 0.001316 |
| TMEM59      | -0.405739524 | 0.000587 | -0.124875413 | 0.28868  | -0.332190596 | 0.004793 |
| WDFY3       | 0.449629016  | 0.000588 | 0.270529588  | 0.03851  | 0.465787028  | 0.000363 |
| SLC30A5     | -0.309033307 | 0.000591 | -0.053561451 | 0.54393  | -0.114169806 | 0.195742 |
| OPA3        | 0.397272786  | 0.000593 | 0.026186123  | 0.82115  | 0.338519752  | 0.003199 |
| ARHGEF17    | 0.716736611  | 0.000595 | 0.073142786  | 0.7268   | 0.55163011   | 0.008204 |
| MYO5C       | -0.570424148 | 0.000597 | -0.309831841 | 0.06121  | -0.557657733 | 0.000765 |
| PKNOX2      | 1.1578937    | 0.000599 | 0.999250309  | 0.00309  | 0.389803871  | 0.250885 |
| MRE11A      | -0.381019446 | 0.0006   | -0.299569859 | 0.00646  | -0.179261726 | 0.101577 |
| TBC1D4      | -0.660172005 | 0.0006   | -0.466730541 | 0.01468  | -0.710076024 | 0.000217 |
| ACSS1       | -0.738097915 | 0.000605 | -0.691748744 | 0.00124  | -1.241276154 | 9.95E-09 |
| !P11-85G20. | 1.332465699  | 0.000606 | 0.321188157  | 0.44285  | 0.677475079  | 0.09154  |

|          |              |          |              |          |              |          |
|----------|--------------|----------|--------------|----------|--------------|----------|
| GFRA1    | 1.268315159  | 0.000607 | 1.371695198  | 0.00021  | 0.960601073  | 0.009445 |
| SFMBT2   | 0.763937064  | 0.000609 | -0.078867864 | 0.72537  | 0.540045028  | 0.015395 |
| MT-ATP6  | 0.908107386  | 0.00061  | 0.429925101  | 0.10478  | 0.068717603  | 0.795491 |
| FAM222A  | 0.917181727  | 0.000614 | -0.26835311  | 0.33536  | 0.347231444  | 0.200388 |
| GBP1     | 1.062246766  | 0.000614 | 0.279401926  | 0.36847  | 1.341474351  | 1.50E-05 |
| TRIM69   | 0.638905858  | 0.000616 | 0.600649764  | 0.00127  | 0.623607823  | 0.000812 |
| CDK1     | -0.540568339 | 0.000619 | -0.15171995  | 0.33415  | -0.055124837 | 0.725431 |
| IL1A     | 2.437287445  | 0.00062  | 3.016493448  | 2.24E-05 | 2.58059395   | 0.000288 |
| SP2      | 0.872953213  | 0.00062  | 0.193290055  | 0.46176  | 0.125056156  | 0.634112 |
| EXT1     | 0.400311447  | 0.000621 | 0.360112234  | 0.00206  | 0.48247216   | 3.55E-05 |
| ATP5A1   | -0.31975035  | 0.000624 | -0.146812366 | 0.1157   | -0.118889943 | 0.202585 |
| BTN3A2   | -0.541581648 | 0.000624 | -0.381913435 | 0.01469  | -0.450465356 | 0.004258 |
| RHOQ     | 0.577987824  | 0.000625 | 0.42211685   | 0.01242  | 0.379469317  | 0.024504 |
| WDR1     | 0.340284655  | 0.000631 | 0.264457528  | 0.00785  | 0.209631397  | 0.03504  |
| SLIT3    | 1.155594315  | 0.000633 | 1.029955127  | 0.00232  | -0.082697173 | 0.807606 |
| NCKAP5L  | 0.499533289  | 0.000635 | 0.192255088  | 0.1904   | 0.199204148  | 0.174177 |
| LRRC32   | 0.902430657  | 0.000636 | 0.808982778  | 0.00218  | 0.273472263  | 0.303041 |
| EMD      | 0.455842541  | 0.000637 | 0.19898      | 0.13513  | 0.318353942  | 0.016439 |
| ZNF485   | -0.724193598 | 0.000637 | -0.101964236 | 0.61211  | -0.452672856 | 0.026012 |
| ANKRD36B | 0.62695245   | 0.000639 | 0.606284234  | 0.00093  | 0.366669471  | 0.045667 |
| CLDN12   | 0.445941737  | 0.00064  | 0.431967495  | 0.00091  | 0.453255297  | 0.000499 |
| PTGIS    | 0.643958147  | 0.000643 | 0.392388769  | 0.03752  | 0.026462549  | 0.888581 |
| TMEM74B  | 1.261945491  | 0.000643 | 1.221751621  | 0.00092  | 1.18336966   | 0.001283 |
| RNF168   | -0.34171048  | 0.000645 | -0.239739972 | 0.01567  | -0.144948616 | 0.143883 |
| CTNNAL1  | -0.358911519 | 0.000648 | -0.216618822 | 0.03773  | 0.002765207  | 0.978713 |
| POGK     | -0.281813409 | 0.000648 | -0.139876519 | 0.08789  | -0.095300583 | 0.243775 |
| C2CD5    | -0.531617834 | 0.000651 | -0.253717948 | 0.10172  | -0.134255957 | 0.386116 |
| RFWD2    | -0.325280152 | 0.000651 | -0.054115406 | 0.56732  | -0.039516943 | 0.675516 |
| MLLT4    | 0.305746734  | 0.000653 | 0.037971733  | 0.67197  | 0.360643302  | 5.61E-05 |
| ARHGAP21 | 0.443716151  | 0.000663 | 0.182944063  | 0.16025  | 0.384990165  | 0.003112 |
| NUDT9    | -0.467692446 | 0.000664 | -0.072568901 | 0.59201  | -0.297145717 | 0.028219 |
| MCM8     | -0.585135077 | 0.000668 | -0.359465415 | 0.03384  | -0.132149295 | 0.431758 |
| FAM133B  | -0.357674306 | 0.000669 | -0.203319932 | 0.05054  | -0.131415911 | 0.203997 |
| GSTA1    | -1.420174599 | 0.000671 | -1.182026963 | 0.00458  | -1.414621476 | 0.000696 |
| COX16    | -0.417300653 | 0.000674 | -0.257050321 | 0.03431  | -0.145339539 | 0.228709 |
| PLK2     | 0.778699722  | 0.000674 | 0.88052398   | 0.00012  | 0.727895251  | 0.001514 |
| ZNF92    | -0.386111756 | 0.000674 | -0.136509264 | 0.22275  | -0.045082435 | 0.685849 |
| NOC3L    | -0.3545088   | 0.000678 | -0.196434611 | 0.05536  | -0.101396937 | 0.321512 |
| PTBP3    | 0.459888631  | 0.000678 | 0.317473091  | 0.01892  | 0.282474634  | 0.036729 |
| RND3     | 0.543544982  | 0.000679 | 0.596038056  | 0.00019  | 0.838917601  | 1.46E-07 |
| TMEM163  | 0.752017746  | 0.000682 | 0.934024978  | 2.35E-05 | 0.419556151  | 0.05823  |
| PLEKHB2  | 0.307287558  | 0.000684 | 0.360528624  | 6.37E-05 | 0.382328471  | 2.20E-05 |
| C9orf116 | -0.803636704 | 0.000685 | -0.64970072  | 0.00447  | -0.389034331 | 0.083725 |
| ZMIZ1    | 0.747985441  | 0.000689 | 0.359263236  | 0.10355  | 0.14225483   | 0.519072 |
| FAM35A   | -0.3544152   | 0.000697 | -0.084396448 | 0.41175  | -0.02615842  | 0.798607 |
| FOXRED1  | -0.447806673 | 0.000698 | -0.30924888  | 0.01709  | -0.292676877 | 0.023765 |
| SH3RF3   | 1.009466424  | 0.0007   | 0.51581107   | 0.08594  | 0.402905     | 0.180608 |

|          |              |          |              |          |              |          |
|----------|--------------|----------|--------------|----------|--------------|----------|
| E2F2     | -0.975871893 | 0.000708 | -0.630463831 | 0.0273   | -0.622760837 | 0.0299   |
| ANAPC4   | -0.524298982 | 0.00071  | -0.194554298 | 0.20234  | -0.298122481 | 0.050752 |
| CDK9     | 0.493584193  | 0.000711 | 0.305010474  | 0.03603  | 0.328499704  | 0.023637 |
| RTKN2    | -0.581585272 | 0.00071  | -0.339580406 | 0.0455   | -0.222636784 | 0.186634 |
| WIPF2    | 0.525531821  | 0.000714 | 0.089817878  | 0.56294  | 0.247005726  | 0.111356 |
| ZNF121   | -0.341013713 | 0.000715 | -0.16055478  | 0.11     | -0.074019199 | 0.460583 |
| LPO      | 2.186889479  | 0.00072  | 1.474352939  | 0.02443  | 1.262222941  | 0.05633  |
| VPS29    | -0.299973061 | 0.000725 | -0.016990233 | 0.8459   | 0.086415897  | 0.321646 |
| RAD54L2  | 0.320240513  | 0.000727 | -0.055273329 | 0.56154  | 0.057831556  | 0.541854 |
| CCT8     | -1.382698698 | 0.000728 | -0.14147019  | 0.72843  | -0.513863495 | 0.207531 |
| SMC6     | -0.340359797 | 0.000729 | -0.031733993 | 0.74915  | -0.002661733 | 0.978545 |
| BRIP1    | -0.568132682 | 0.00073  | -0.500338469 | 0.00281  | -0.317554245 | 0.057193 |
| THOC3    | -0.470617358 | 0.000732 | -0.259487285 | 0.05805  | -0.405868521 | 0.003307 |
| RBMX2    | -0.549827404 | 0.000736 | -0.004450561 | 0.97766  | 0.08907202   | 0.573973 |
| MRPL24   | -0.4452011   | 0.000738 | -0.27340719  | 0.03514  | -0.424516887 | 0.001119 |
| ZNF813   | -0.622437391 | 0.000738 | -0.157127688 | 0.38941  | -0.277909968 | 0.128133 |
| SEMA5A   | 1.087923275  | 0.000739 | 0.182989828  | 0.57111  | 0.351385856  | 0.276145 |
| RAB43    | 1.643394423  | 0.000746 | 1.134056743  | 0.02006  | 0.656139232  | 0.179148 |
| GCA      | -0.62400814  | 0.000748 | -0.280728468 | 0.12432  | -0.436631714 | 0.017247 |
| CCSER1   | -0.615063779 | 0.00075  | -0.434297118 | 0.01684  | -0.421878826 | 0.020055 |
| MAOA     | -0.753600746 | 0.000751 | -0.50840219  | 0.02277  | -0.417482655 | 0.061374 |
| PSMD3    | 0.250004453  | 0.000754 | 0.170990071  | 0.02075  | 0.190646152  | 0.009845 |
| CREBZF   | -0.330265859 | 0.000755 | -0.334013828 | 0.00063  | -0.034778721 | 0.720586 |
| CLIC4    | 0.446613926  | 0.000757 | 0.331139697  | 0.01247  | 0.498804994  | 0.000166 |
| CDC42SE1 | 0.347940706  | 0.000758 | 0.18124241   | 0.07939  | 0.435714934  | 2.34E-05 |
| RDH10    | 0.593267604  | 0.000759 | 0.33562488   | 0.05674  | 0.709126525  | 5.60E-05 |
| ANKMY2   | -0.365162726 | 0.000765 | -0.129498122 | 0.22647  | -0.214994933 | 0.044726 |
| RAB13    | 0.424515778  | 0.000764 | 0.225994176  | 0.07322  | 0.091249638  | 0.470129 |
| RTN4     | 0.282333644  | 0.000767 | 0.270343423  | 0.00126  | 0.33480595   | 6.42E-05 |
| FAM160B2 | 0.442314328  | 0.000767 | 0.333162049  | 0.01128  | 0.285035917  | 0.03021  |
| BRD4     | 0.589918712  | 0.000769 | 0.154928375  | 0.37766  | 0.28704242   | 0.101827 |
| PSMB9    | 1.2778389    | 0.000769 | 1.559725181  | 3.14E-05 | 1.480148542  | 7.97E-05 |
| GNPDA2   | -0.385001031 | 0.000772 | -0.103031286 | 0.36074  | -0.059263912 | 0.597746 |
| FDX1     | -0.444759129 | 0.000775 | -0.194128875 | 0.13644  | -0.39263821  | 0.002715 |
| SKP2     | -0.459473683 | 0.000776 | -0.411527469 | 0.00237  | -0.25201331  | 0.062586 |
| IMPDH2   | -0.386075482 | 0.000779 | -0.15950566  | 0.16386  | -0.259416184 | 0.023666 |
| ZSWIM4   | 0.762616406  | 0.000779 | 0.534160872  | 0.01882  | 0.513036425  | 0.024221 |
| KLF7     | 0.919475988  | 0.000781 | 0.618597386  | 0.02395  | 0.244852278  | 0.371729 |
| UGCG     | 0.64121699   | 0.000781 | 0.279881255  | 0.1428   | 0.837921584  | 1.11E-05 |
| IMPDH1   | -0.655217699 | 0.000783 | -0.636097403 | 0.00109  | -0.859630793 | 1.04E-05 |
| SYPL1    | -0.32878057  | 0.000784 | -0.03864531  | 0.69     | -0.123025677 | 0.204674 |
| PDIA3P1  | -0.751737311 | 0.000786 | -0.253150822 | 0.23886  | -0.434516613 | 0.044549 |
| OXCT1    | -0.569174677 | 0.000788 | -0.288435982 | 0.08354  | -0.135872196 | 0.41623  |
| RALGDS   | 0.455271814  | 0.000788 | 0.067584547  | 0.61932  | 0.187963885  | 0.165896 |
| POLR3GL  | -0.482570829 | 0.000789 | -0.539789459 | 0.00015  | -0.455769255 | 0.001231 |
| CLIP1    | 0.317808798  | 0.00079  | 0.168094383  | 0.07558  | 0.352533698  | 0.000179 |
| ADAMTSL5 | 1.064670885  | 0.000799 | 0.676837904  | 0.03462  | 0.302856293  | 0.349893 |

|          |              |          |              |          |              |          |
|----------|--------------|----------|--------------|----------|--------------|----------|
| TMA7     | -0.257518817 | 0.000799 | -0.050515298 | 0.50602  | -0.048661109 | 0.52121  |
| PLIN5    | 1.178432364  | 0.0008   | 0.920715081  | 0.00911  | 0.706076595  | 0.045374 |
| CHST15   | 1.018607822  | 0.000803 | -0.117639654 | 0.70005  | 0.673140978  | 0.026868 |
| SNRNP48  | -0.336926426 | 0.000804 | -0.282547009 | 0.0045   | 0.084210279  | 0.389073 |
| CWF19L2  | -0.361792013 | 0.000807 | -0.064001092 | 0.54414  | 0.020168717  | 0.847141 |
| DOK3     | 1.019008382  | 0.000811 | 0.913934887  | 0.00275  | 0.81597102   | 0.007117 |
| SETD1B   | 0.758558805  | 0.000811 | 0.311489016  | 0.17335  | 0.152300921  | 0.506365 |
| GIN51    | -0.529907393 | 0.000812 | -0.342424024 | 0.0292   | -0.20028363  | 0.200655 |
| IDH1     | -0.416919154 | 0.000812 | -0.308039958 | 0.01327  | -0.252093979 | 0.042641 |
| HAT1     | -0.372519825 | 0.000813 | -0.127514708 | 0.24728  | -0.121230998 | 0.270961 |
| CD1D     | 1.080062951  | 0.000816 | 1.226551102  | 0.00013  | 0.606667164  | 0.061272 |
| IMPACT   | -0.42364684  | 0.000819 | -0.216478636 | 0.08393  | -0.308662923 | 0.013735 |
| ASB9     | -1.194929443 | 0.000824 | -0.637295547 | 0.06928  | -0.009786828 | 0.977354 |
| HIBCH    | -0.63982317  | 0.000823 | -0.608167292 | 0.00138  | -0.456531008 | 0.016168 |
| CINP     | -0.319638183 | 0.000826 | -0.205723881 | 0.02818  | -0.268666028 | 0.004189 |
| PRRT2    | 1.063709089  | 0.000829 | 0.186281654  | 0.56472  | 0.783230858  | 0.014095 |
| AFF4     | 0.444033456  | 0.000831 | 0.212834325  | 0.10903  | 0.287380139  | 0.030427 |
| CALM2    | -0.32528925  | 0.000832 | 0.024233868  | 0.80309  | -0.095864301 | 0.324008 |
| DENND5A  | 0.556576623  | 0.000832 | 0.279705118  | 0.09307  | 0.450658415  | 0.006737 |
| RPL6     | -0.382359168 | 0.000833 | -0.280283286 | 0.01428  | -0.142172094 | 0.213807 |
| SPAG7    | -0.244785751 | 0.000833 | -0.099839007 | 0.16587  | -0.020846732 | 0.770744 |
| 3-Mar    | 0.786311385  | 0.000842 | 0.945224543  | 4.87E-05 | 0.749540578  | 0.001329 |
| HSPE1P3  | -2.279927015 | 0.000845 | 0.175955183  | 0.78767  | 0.529674878  | 0.416486 |
| ULK1     | 0.714615174  | 0.000845 | 0.228584757  | 0.28788  | 0.192973843  | 0.370163 |
| TEAD2    | 0.567671958  | 0.000848 | -0.082210055 | 0.62952  | 0.471193288  | 0.005533 |
| PPM1D    | -0.32461485  | 0.000849 | -0.170204942 | 0.07581  | -0.123006145 | 0.196522 |
| C9orf152 | -1.112048204 | 0.000852 | -0.916019847 | 0.0057   | -1.511866143 | 6.18E-06 |
| RUVBL1   | -0.415137411 | 0.000858 | -0.220567706 | 0.07339  | -0.138934988 | 0.258906 |
| HEBP2    | -0.350208756 | 0.000862 | 0.12045389   | 0.24892  | -0.149716813 | 0.152129 |
| AVP11    | -0.970079055 | 0.000872 | -0.843359317 | 0.00343  | -1.014679366 | 0.000453 |
| MEX3C    | 0.691528612  | 0.000871 | 0.449131205  | 0.03057  | 0.416565285  | 0.044885 |
| PTDSS1   | -0.34890697  | 0.000875 | -0.208840907 | 0.04515  | -0.37309624  | 0.000357 |
| BMP5     | 1.100744806  | 0.000876 | 1.034086523  | 0.00175  | 0.632981925  | 0.056265 |
| HSF1     | 0.48922354   | 0.000877 | 0.185002421  | 0.20891  | 0.242143907  | 0.100701 |
| MRPL19   | -0.380445974 | 0.000878 | -0.004049827 | 0.97147  | -0.186819358 | 0.098593 |
| CCDC71L  | 0.690156861  | 0.00088  | 0.326187163  | 0.11683  | 0.550639901  | 0.007878 |
| SIPA1L2  | 0.612088249  | 0.00088  | 0.362454842  | 0.0489   | 0.607446249  | 0.000956 |
| ADH5     | -0.378106717 | 0.000881 | -0.271168916 | 0.01658  | -0.066800238 | 0.554289 |
| FAM208A  | -0.31627976  | 0.000883 | 0.006187167  | 0.94788  | -0.032757904 | 0.729355 |
| HEXB     | -0.495129737 | 0.000885 | -0.259028618 | 0.08136  | -0.264485986 | 0.075128 |
| ANAPC5   | -0.343172633 | 0.000888 | -0.199765064 | 0.05199  | -0.328434316 | 0.001407 |
| GJC2     | -0.982266476 | 0.000888 | -0.95085752  | 0.0011   | -1.040597556 | 0.000363 |
| EXOSC8   | -0.405904771 | 0.000889 | -0.024056382 | 0.84208  | -0.027452343 | 0.819453 |
| NUP54    | -0.356629923 | 0.00089  | -0.025665686 | 0.8093   | 0.016140125  | 0.879144 |
| ARHGAP24 | -0.658506774 | 0.000893 | 0.026032553  | 0.8935   | -0.45683453  | 0.020211 |
| BRCC3    | -0.351459334 | 0.0009   | -0.034508905 | 0.74023  | -0.128204727 | 0.218882 |
| ARSD     | -0.405284702 | 0.000902 | -0.239722864 | 0.04828  | -0.517947128 | 2.13E-05 |

|           |              |          |              |          |              |          |
|-----------|--------------|----------|--------------|----------|--------------|----------|
| SHC1      | 0.386944337  | 0.000902 | 0.280607895  | 0.016    | 0.34224689   | 0.003281 |
| IQGAP2    | -0.67069868  | 0.000903 | -0.515764262 | 0.01064  | -0.687234731 | 0.000666 |
| PRKACA    | 0.664622622  | 0.000904 | 0.367922712  | 0.06759  | 0.232152576  | 0.249763 |
| AZI2      | 0.384701197  | 0.000906 | 0.423269229  | 0.00025  | 0.396198258  | 0.000597 |
| DBP       | -1.204316317 | 0.000905 | -1.542811432 | 2.06E-05 | -0.937557552 | 0.00935  |
| DTWD1     | -0.376099397 | 0.000908 | -0.310416256 | 0.00579  | -0.262479137 | 0.019051 |
| U2SURP    | -0.329233536 | 0.000908 | -0.147732751 | 0.13528  | -0.000863099 | 0.993029 |
| ARHGEF34F | 0.550287183  | 0.00091  | 0.147211289  | 0.37593  | 0.322355658  | 0.051976 |
| VGLL4     | 0.294746792  | 0.000912 | 0.030887183  | 0.72723  | -0.089747445 | 0.311008 |
| CPNE3     | -0.266090829 | 0.000918 | -0.047289591 | 0.55327  | -0.196421639 | 0.013781 |
| EIF4G3    | 0.273696785  | 0.000919 | 0.161249883  | 0.05047  | 0.111744723  | 0.1746   |
| UBL5      | -0.380387424 | 0.000922 | -0.177467555 | 0.1189   | -0.208885678 | 0.06636  |
| EHD4      | 0.380773799  | 0.000927 | 0.486536976  | 1.94E-05 | 0.392918662  | 0.000568 |
| PRIMPOL   | -0.706106975 | 0.00093  | -0.271852626 | 0.19022  | -0.499524099 | 0.016217 |
| TMEM173   | 1.023012147  | 0.00093  | 0.728761092  | 0.01839  | 0.282175217  | 0.362998 |
| CLIP3     | 1.075291126  | 0.000936 | 0.058141411  | 0.86033  | 0.39797527   | 0.224655 |
| COQ3      | -0.765617763 | 0.000942 | -0.170475292 | 0.44211  | -0.653950116 | 0.004127 |
| H2AFV     | -0.427522863 | 0.000943 | -0.090397428 | 0.48317  | -0.057828819 | 0.653452 |
| ZNF22     | -0.422884153 | 0.000949 | -0.180566111 | 0.15399  | 0.000282541  | 0.998212 |
| TAF4B     | -0.739352576 | 0.000955 | -0.555551067 | 0.0115   | -0.686063904 | 0.001867 |
| PSMA1     | -0.31207614  | 0.000962 | 0.09722001   | 0.29937  | 0.077181607  | 0.410008 |
| CDK6      | 0.510806551  | 0.000963 | 0.190217694  | 0.21887  | 0.207804929  | 0.179152 |
| PSD       | 1.041266014  | 0.000963 | -0.338951512 | 0.30538  | 0.760984241  | 0.016088 |
| PPAP2C    | -0.869562961 | 0.000971 | -0.579022136 | 0.02628  | -0.912406342 | 0.000485 |
| VMA21     | -0.283010754 | 0.000972 | -0.176737425 | 0.03802  | -0.166939767 | 0.049704 |
| NR1D2     | -0.830186134 | 0.000975 | -0.84285857  | 0.00078  | -0.735699026 | 0.003289 |
| EXOC7     | 0.312093081  | 0.000977 | 0.071236483  | 0.45199  | 0.403033863  | 1.99E-05 |
| CENPK     | -0.536095529 | 0.000986 | -0.201686612 | 0.20799  | -0.185653182 | 0.24495  |
| ARL8B     | 0.934897311  | 0.000987 | 0.745522286  | 0.0085   | 0.466536251  | 0.09948  |
| CCDC34    | -0.512825432 | 0.00099  | -0.478706203 | 0.00191  | -0.381875026 | 0.013111 |
| ATP11B    | -0.323105293 | 0.000991 | -0.018930064 | 0.84666  | -0.081122767 | 0.407347 |
| MCM7      | -0.509644106 | 0.000994 | -0.367770844 | 0.01729  | -0.288885994 | 0.061178 |
| RAC2      | 0.957452439  | 0.000993 | 0.494247395  | 0.09002  | 0.530163744  | 0.06882  |
| SORBS2    | -0.774229814 | 0.000994 | -0.517467618 | 0.02635  | -1.239587003 | 1.52E-07 |
| SAE1      | -0.34101557  | 0.000999 | -0.345706371 | 0.00083  | -0.052779148 | 0.608356 |
| ANAPC1    | -0.362531027 | 0.001006 | -0.272829337 | 0.01305  | -0.274628628 | 0.012354 |
| SLC35F6   | 0.303484501  | 0.001014 | 0.095714128  | 0.29988  | 0.041084243  | 0.656479 |
| CTGF      | 1.116922777  | 0.001023 | 1.105987948  | 0.00114  | 0.939851455  | 0.00571  |
| IMMP2L    | -0.677226126 | 0.001028 | -0.404579091 | 0.04428  | -0.650698442 | 0.001473 |
| C19orf66  | 0.582020317  | 0.001031 | 0.450934722  | 0.01093  | 0.604515037  | 0.000608 |
| DVL3      | 0.337137206  | 0.001033 | 0.056974159  | 0.58169  | 0.060021793  | 0.56058  |
| LIN7C     | -0.304695554 | 0.001035 | -0.28018844  | 0.00246  | -0.143773795 | 0.119335 |
| FHOD3     | 1.721556498  | 0.001039 | 1.830058108  | 0.00047  | 1.324583313  | 0.013716 |
| PLXNB2    | 0.540589263  | 0.001039 | 0.137981014  | 0.40258  | 0.235567496  | 0.153072 |
| TOLLIP    | 0.442514268  | 0.001042 | 0.135955183  | 0.31372  | -0.033315811 | 0.80618  |
| CDC6      | -0.656287352 | 0.001043 | -0.561260361 | 0.00486  | -0.41645155  | 0.036452 |
| JAG1      | 0.616841254  | 0.001047 | 0.983313928  | 1.68E-07 | 0.652955576  | 0.000517 |

|          |              |          |              |          |              |          |
|----------|--------------|----------|--------------|----------|--------------|----------|
| RAB7A    | 0.604801305  | 0.001055 | 0.469856135  | 0.01095  | 0.534398989  | 0.003795 |
| ZNF443   | -0.643726887 | 0.001055 | -0.326401957 | 0.08871  | -0.082327078 | 0.663534 |
| SYNPO    | 1.300573348  | 0.001056 | 1.060577921  | 0.00757  | 0.938970555  | 0.018205 |
| PGGT1B   | -0.379036043 | 0.00106  | 0.024956777  | 0.82805  | -0.057193252 | 0.618365 |
| SLC19A2  | -0.378132765 | 0.001062 | -0.183825609 | 0.1076   | 0.011306583  | 0.920714 |
| POT1     | -0.528185328 | 0.001065 | 0.051760608  | 0.74518  | -0.363182983 | 0.022823 |
| KDM4B    | 0.609027449  | 0.001068 | 0.066276896  | 0.72319  | 0.235681101  | 0.206782 |
| CYLD     | 0.450686865  | 0.001069 | 0.45643233   | 0.00089  | 0.473284549  | 0.000553 |
| TMEM19   | -0.675683368 | 0.00107  | 0.014587202  | 0.94328  | -0.388092314 | 0.059084 |
| ALDH18A1 | -0.463513263 | 0.001071 | -0.312218104 | 0.0274   | -0.592090499 | 2.91E-05 |
| SIRT6    | 0.605962302  | 0.001075 | 0.235286234  | 0.20715  | 0.021564309  | 0.909387 |
| ANKRD11  | 0.363096082  | 0.00108  | 0.054923458  | 0.62125  | 0.119566961  | 0.281575 |
| SLC27A5  | -0.545628406 | 0.00108  | -0.46160013  | 0.0052   | -0.42812622  | 0.009576 |
| FAU      | -0.332634861 | 0.001084 | -0.025701605 | 0.79984  | -0.127326085 | 0.209382 |
| ALOX5    | 1.607460186  | 0.001089 | 1.772720516  | 0.00031  | 1.423368693  | 0.003795 |
| DSP      | -0.423768735 | 0.001088 | -0.398012575 | 0.00215  | -0.594363748 | 4.60E-06 |
| SASS6    | -0.56884907  | 0.001093 | -0.261836588 | 0.12864  | -0.128873173 | 0.453088 |
| AIMP1    | -0.373729917 | 0.001097 | -0.159931344 | 0.15749  | -0.219294103 | 0.052176 |
| FAM3B    | -0.948820464 | 0.001102 | -0.134836138 | 0.63741  | -1.273089718 | 1.36E-05 |
| GPD2     | -0.453798436 | 0.001104 | -0.312217615 | 0.0244   | -0.220110592 | 0.112631 |
| ALG13    | -0.482622528 | 0.001107 | -0.199531049 | 0.17082  | -0.377896989 | 0.009838 |
| AUH      | -0.593457187 | 0.001111 | -0.256836629 | 0.14967  | -0.367924853 | 0.039689 |
| RTFDC1   | -0.356603482 | 0.001114 | -0.146145198 | 0.17796  | -0.149447717 | 0.168045 |
| ADAMTSL2 | 1.379997114  | 0.001117 | 0.966237582  | 0.02417  | 0.130085907  | 0.772293 |
| CSPP1    | -0.446080704 | 0.001117 | -0.169568644 | 0.20949  | -0.230584429 | 0.08781  |
| GPR124   | 0.810922243  | 0.001117 | -0.052233108 | 0.83397  | 0.208529972  | 0.402328 |
| MGAT1    | 0.309214744  | 0.001121 | 0.181600752  | 0.05523  | 0.084424763  | 0.373652 |
| HNRNPDL  | -0.253104246 | 0.001124 | -0.1196225   | 0.12291  | -0.032826676 | 0.671795 |
| TARSL2   | -0.498092599 | 0.001124 | -0.542003816 | 0.00037  | -0.352259969 | 0.020066 |
| RASA4B   | 1.151732549  | 0.001131 | 0.337723795  | 0.34743  | 0.01712779   | 0.962387 |
| CHML     | -0.34501751  | 0.00114  | -0.047792503 | 0.64818  | -0.1957079   | 0.062259 |
| TTC39B   | 0.408463175  | 0.001141 | 0.601164981  | 1.53E-06 | 0.432146002  | 0.000562 |
| DNAJB5   | 0.68298442   | 0.001144 | 0.287092979  | 0.17396  | 0.594390888  | 0.004472 |
| CAMLG    | -0.447623323 | 0.001148 | -0.138745184 | 0.30478  | -0.175650206 | 0.194713 |
| PLCH1    | -0.737885446 | 0.001147 | -0.281269388 | 0.21141  | -0.772453981 | 0.000645 |
| PRSS12   | 0.965928017  | 0.001147 | 1.162541065  | 8.88E-05 | 1.029210726  | 0.000526 |
| CARM1    | 0.373220534  | 0.001153 | -0.0398255   | 0.72864  | 0.009655614  | 0.93297  |
| CTSV     | -0.58986167  | 0.001152 | -0.386045363 | 0.0303   | -0.540659449 | 0.002622 |
| MAP3K9   | 0.506554556  | 0.001154 | -0.127873305 | 0.41447  | 0.152200035  | 0.329217 |
| SEC24B   | 0.235330853  | 0.001154 | 0.010614123  | 0.88361  | 0.224025856  | 0.001834 |
| COX7C    | -0.352858292 | 0.001162 | -0.114208593 | 0.29164  | -0.194409157 | 0.072675 |
| UBXN10   | -1.176946768 | 0.001165 | -0.730358546 | 0.03332  | -0.884598587 | 0.010483 |
| CASP4    | 0.571802913  | 0.00117  | 0.763822719  | 1.38E-05 | 0.643685292  | 0.000249 |
| CYB5B    | 0.278985431  | 0.001172 | 0.287607404  | 0.00079  | 0.4615741    | 6.69E-08 |
| DARS     | -0.313187908 | 0.001172 | -0.214307642 | 0.02564  | -0.164567352 | 0.086394 |
| FAM168A  | 0.285798927  | 0.001172 | 0.203596616  | 0.02023  | 0.163798361  | 0.06158  |
| HINT3    | -0.3014493   | 0.00117  | 0.041967669  | 0.64438  | -0.071053419 | 0.435457 |

|             |              |          |              |          |              |          |
|-------------|--------------|----------|--------------|----------|--------------|----------|
| PTX3        | 2.06697005   | 0.001171 | 1.642330706  | 0.00993  | 2.063404498  | 0.001191 |
| TASP1       | -0.419882166 | 0.001171 | -0.253452552 | 0.04567  | -0.319772564 | 0.011519 |
| P1-130H16.1 | 4.469109534  | 0.001176 | 3.292676144  | 0.01741  | 3.313532808  | 0.01671  |
| ATN1        | 0.876623339  | 0.001178 | 0.147839897  | 0.58709  | 0.310442765  | 0.252514 |
| CRTC2       | 0.711911348  | 0.001184 | 0.189183847  | 0.39303  | 0.484451545  | 0.027897 |
| DHODH       | -0.51369588  | 0.001187 | -0.315294653 | 0.04515  | -0.353332817 | 0.024159 |
| CHST11      | 1.080212335  | 0.001192 | 0.423537503  | 0.20398  | 0.137619431  | 0.680105 |
| MLLT1       | 0.369632007  | 0.001211 | 0.244153389  | 0.03286  | -0.044209024 | 0.70015  |
| CMTM6       | -0.301069767 | 0.001215 | 0.027194828  | 0.76905  | -0.088063296 | 0.341933 |
| IL1R1       | 1.035486314  | 0.001216 | 0.710953412  | 0.02636  | 1.041306672  | 0.001138 |
| PDLIM4      | 0.720628208  | 0.001213 | 0.611565336  | 0.00594  | 0.389832208  | 0.080554 |
| PIK3CG      | 1.472870608  | 0.001214 | 0.893003207  | 0.05612  | 0.864687609  | 0.05988  |
| VAMP2       | 0.653027645  | 0.001217 | -0.112875707 | 0.58842  | 0.175812824  | 0.389489 |
| COL4A3BP    | -0.358745574 | 0.001219 | -0.153993746 | 0.16143  | -0.122569632 | 0.263816 |
| PXMP2       | -0.60289063  | 0.001219 | -0.364004415 | 0.04625  | -0.504995016 | 0.005604 |
| TMEM245     | -0.28982047  | 0.001222 | -0.25118031  | 0.00492  | -0.148915077 | 0.094611 |
| RPS17L      | -0.525350737 | 0.001223 | -0.24299205  | 0.13451  | -0.108465611 | 0.504048 |
| MIS18BP1    | -0.498982872 | 0.00123  | -0.202361948 | 0.18791  | 0.147338125  | 0.336663 |
| ANKLE2      | 0.403323858  | 0.001232 | 0.263872394  | 0.03423  | 0.474579927  | 0.000138 |
| PRDX6       | -0.321378094 | 0.001232 | -0.219983576 | 0.02663  | -0.204887421 | 0.038835 |
| C4orf27     | -0.419148802 | 0.001236 | -0.489358809 | 0.00014  | -0.242725973 | 0.055349 |
| FPGT        | -0.498454058 | 0.001241 | -0.481599589 | 0.00137  | -0.40772605  | 0.006707 |
| PDPN        | 1.594290987  | 0.001242 | 1.319505728  | 0.00766  | 1.321247103  | 0.007596 |
| RCN2        | -0.302254067 | 0.001245 | -0.07145586  | 0.44203  | 0.026323672  | 0.776601 |
| PPP1R3B     | -0.518312429 | 0.001248 | -0.384508168 | 0.01646  | -0.587426666 | 0.000251 |
| SPRR3       | 2.570134907  | 0.001249 | 3.16578251   | 6.55E-05 | 1.902151342  | 0.017328 |
| CFZP761J14  | 0.715822911  | 0.001254 | 0.244345229  | 0.27244  | 0.131368603  | 0.557222 |
| FANCB       | -0.767359488 | 0.001254 | -0.520271391 | 0.02575  | -0.385837983 | 0.095699 |
| PGRMC2      | -0.565177253 | 0.001254 | -0.046666976 | 0.78849  | -0.416583521 | 0.016972 |
| FBXL7       | 0.799823969  | 0.001256 | -0.029466108 | 0.90661  | 0.57666338   | 0.020065 |
| NAA15       | -0.33853918  | 0.001259 | -0.118843647 | 0.25593  | -0.153552927 | 0.14115  |
| CENPC       | -0.321526794 | 0.00127  | -0.060369069 | 0.5387   | -0.060553106 | 0.535946 |
| AKT2        | 0.379264699  | 0.001275 | 0.01427121   | 0.90347  | 0.279806881  | 0.017186 |
| F2RL2       | 0.715699412  | 0.001275 | 0.616593704  | 0.00551  | 0.615637884  | 0.005568 |
| FAM222B     | 0.673764617  | 0.001279 | 0.147644231  | 0.48297  | 0.338189379  | 0.106839 |
| HAPLN3      | 1.182867927  | 0.001279 | 1.272384066  | 0.0005   | 0.521579643  | 0.158581 |
| TLDC1       | 0.335599897  | 0.001278 | 0.14078481   | 0.17402  | 0.174554458  | 0.09183  |
| NUMB        | 0.367673372  | 0.001285 | 0.191954957  | 0.09231  | 0.26006478   | 0.022494 |
| ERCC6L      | -0.684014506 | 0.001289 | -0.14995647  | 0.47369  | -0.212500514 | 0.310084 |
| PCCB        | -0.526242529 | 0.001288 | -0.325297049 | 0.04518  | -0.271853158 | 0.094306 |
| ZSWIM6      | 0.343404662  | 0.001289 | 0.110482934  | 0.30125  | 0.271742241  | 0.010466 |
| GEN1        | -0.583572823 | 0.001291 | -0.338243948 | 0.06125  | -0.130588424 | 0.469314 |
| FBRSL1      | 0.819096465  | 0.001293 | -0.220016714 | 0.38969  | -0.259065386 | 0.312805 |
| SH3KBP1     | 0.616917339  | 0.001306 | 0.493744195  | 0.0099   | 0.165154527  | 0.390429 |
| SNRPE       | -0.388139825 | 0.001307 | -0.149534663 | 0.21099  | -0.000629307 | 0.995788 |
| TNFSF18     | 1.352924108  | 0.00131  | 1.123310964  | 0.00763  | 0.932091275  | 0.026978 |
| CEBPZ-AS1   | -0.893292015 | 0.001312 | 0.130676678  | 0.63006  | -1.114859597 | 6.08E-05 |

|           |              |          |              |          |              |          |
|-----------|--------------|----------|--------------|----------|--------------|----------|
| NDUFS3    | -0.327840872 | 0.001315 | -0.13412583  | 0.18184  | -0.182683116 | 0.068579 |
| PLBD1     | -0.726952706 | 0.001321 | 0.141708726  | 0.52724  | -0.576829867 | 0.010465 |
| CASP10    | 0.758925808  | 0.001324 | 1.076036734  | 4.84E-06 | 1.084028456  | 4.11E-06 |
| PIK3CD    | 1.860380234  | 0.001324 | 1.612066205  | 0.00563  | 0.982516131  | 0.091327 |
| PTGR1     | -0.484294756 | 0.001324 | -0.191502022 | 0.20204  | -0.216127235 | 0.149868 |
| NPLOC4    | 0.295138162  | 0.001334 | 0.285921329  | 0.00185  | 0.411870202  | 6.96E-06 |
| PFDN4     | -0.471490522 | 0.001333 | -0.137696273 | 0.33078  | -0.001124804 | 0.993566 |
| SLC16A1   | -0.368866211 | 0.001334 | -0.212429225 | 0.06337  | -0.297237692 | 0.009421 |
| SOD1      | -0.273699777 | 0.001341 | -0.050746591 | 0.54813  | -0.054075718 | 0.521764 |
| NSMCE4A   | -0.386801092 | 0.001342 | -0.121418676 | 0.30812  | -0.052512643 | 0.658078 |
| AGO3      | 0.441470779  | 0.001345 | 0.239269945  | 0.08219  | 0.196215632  | 0.153419 |
| TMEM141   | -0.515869034 | 0.001353 | -0.352989626 | 0.02774  | -0.518811934 | 0.001233 |
| OTUD5     | 0.409415293  | 0.001357 | 0.38467502   | 0.00253  | 0.40052427   | 0.00167  |
| SLBP      | -0.388684974 | 0.001357 | -0.184244441 | 0.1253   | -0.138990396 | 0.247174 |
| EEF1G     | -0.384389747 | 0.001359 | -0.212476532 | 0.07655  | -0.307946446 | 0.010265 |
| EEF1B2    | -0.388702034 | 0.001365 | -0.181853429 | 0.13368  | -0.234610105 | 0.053017 |
| HIP1      | 0.899433518  | 0.001365 | 0.617964129  | 0.0279   | 0.675023484  | 0.016275 |
| FBLN1     | 0.464913568  | 0.00137  | 0.013894848  | 0.92395  | 0.342754137  | 0.018192 |
| HAUS3     | -0.338146996 | 0.001372 | -0.009630039 | 0.92576  | -0.05991603  | 0.560579 |
| PPP1R16A  | 0.4771855    | 0.001375 | 0.275157115  | 0.06484  | -0.054885568 | 0.71333  |
| HELZ2     | 0.823867473  | 0.001378 | 0.653027713  | 0.01112  | 0.92247529   | 0.000353 |
| PSMD4     | -0.305429167 | 0.001378 | -0.137542296 | 0.14698  | -0.060169949 | 0.525163 |
| QRSL1     | -0.364634314 | 0.001382 | -0.007005075 | 0.95037  | 0.014946     | 0.894194 |
| DIO3      | 2.092139499  | 0.001384 | 2.1565082    | 0.00097  | 0.931977653  | 0.156019 |
| PAN-P2RY1 | 3.204805515  | 0.001389 | 1.766948827  | 0.08118  | 1.731547752  | 0.087407 |
| TXN       | -0.404436254 | 0.001391 | 0.093405527  | 0.45824  | -0.015787717 | 0.900254 |
| PKD1P6    | 0.58110745   | 0.001395 | 0.014219055  | 0.93842  | 0.094453228  | 0.605507 |
| RPS26     | -0.422661141 | 0.001395 | -0.138942882 | 0.29178  | -0.12259076  | 0.352063 |
| RPL34     | -0.365761045 | 0.001398 | -0.168631541 | 0.14026  | -0.106966683 | 0.349393 |
| ZNF204P   | -0.59906128  | 0.001408 | -0.410794619 | 0.02675  | -0.117324175 | 0.523403 |
| MMS22L    | -0.710108547 | 0.001416 | -0.349509646 | 0.11549  | -0.347995004 | 0.116946 |
| TAGLN2    | -0.470648271 | 0.001431 | -0.072064314 | 0.6249   | -0.579058342 | 8.70E-05 |
| TUSC3     | -0.380794265 | 0.00143  | 0.03186136   | 0.78851  | -0.203364451 | 0.087274 |
| ZNF573    | -0.562568323 | 0.001431 | -0.180919208 | 0.29194  | -0.293079143 | 0.088439 |
| OTUB1     | 0.252408461  | 0.001434 | 0.049200006  | 0.53596  | 0.186738077  | 0.018017 |
| TTYH3     | 0.600201585  | 0.001434 | -0.01425265  | 0.93976  | -0.172660992 | 0.360689 |
| SZRD1     | 0.330503149  | 0.00144  | 0.089789681  | 0.38597  | 0.096858817  | 0.349263 |
| C15orf48  | 1.177909596  | 0.001442 | 1.665148122  | 6.16E-06 | 1.104111987  | 0.002793 |
| PDIA3     | -0.374678848 | 0.00145  | -0.119295229 | 0.31035  | -0.074374387 | 0.527054 |
| WDR45     | 0.540831774  | 0.001449 | 0.253704749  | 0.135    | 0.408297051  | 0.016043 |
| MNT       | 0.470278205  | 0.001454 | 0.202853294  | 0.17191  | 0.232290909  | 0.117382 |
| RECQL     | -0.358563932 | 0.001457 | -0.008917209 | 0.93614  | -0.033657113 | 0.762416 |
| UBE2R2    | 0.191650038  | 0.001456 | -0.045423683 | 0.45187  | 0.173630245  | 0.00358  |
| CCRL2     | 1.565105988  | 0.001464 | 1.364932602  | 0.00552  | 0.564159212  | 0.263797 |
| MIS18A    | -0.516652219 | 0.001476 | -0.287844139 | 0.07085  | -0.222516968 | 0.16094  |
| BAIAP2L2  | 1.200776946  | 0.00148  | 0.465462175  | 0.22189  | 1.134914049  | 0.002651 |
| EGR2      | 1.137172169  | 0.001482 | 0.977259708  | 0.00629  | 0.697479704  | 0.051705 |



|             |              |          |              |         |              |          |
|-------------|--------------|----------|--------------|---------|--------------|----------|
| LDLRAD4     | 0.962863222  | 0.001481 | 0.662245251  | 0.02869 | 0.716873576  | 0.017779 |
| ZNF75A      | -0.450702475 | 0.001487 | -0.012218349 | 0.93001 | -0.028407804 | 0.838117 |
| ABCF2       | 0.367204558  | 0.001493 | 0.357277591  | 0.00194 | 0.42389429   | 0.000231 |
| SUMF2       | -0.368837863 | 0.001494 | -0.41399579  | 0.00035 | -0.46385737  | 6.33E-05 |
| RELA        | 0.760450715  | 0.0015   | 0.098521181  | 0.68154 | 0.328679083  | 0.170443 |
| PPM1L       | -0.430482486 | 0.001502 | -0.496948989 | 0.00024 | -0.491946545 | 0.000274 |
| C19orf47    | 0.575481383  | 0.001507 | 0.289714003  | 0.11261 | 0.469215863  | 0.009538 |
| ARGLU1      | -0.360772126 | 0.001509 | -0.263692743 | 0.02003 | 0.017403371  | 0.877673 |
| AGFG2       | 0.538347366  | 0.001515 | 0.241626343  | 0.15598 | 0.301444541  | 0.075297 |
| GNB1        | 0.36242728   | 0.001516 | 0.196403299  | 0.08545 | 0.390809601  | 0.000616 |
| CNTNAP3     | 1.01816229   | 0.001518 | 0.252734951  | 0.43483 | 0.724711434  | 0.023464 |
| TMED1       | -0.433296816 | 0.001523 | -0.186618572 | 0.16152 | -0.324011431 | 0.015121 |
| MT-ND4      | 0.877301606  | 0.001525 | 0.226885311  | 0.41245 | 0.219256471  | 0.428334 |
| PLAUR       | 0.719670661  | 0.001526 | 0.551970785  | 0.01507 | 0.649701084  | 0.004183 |
| CHAC2       | -0.914707434 | 0.001527 | -0.048843434 | 0.85593 | -0.49558604  | 0.071417 |
| POU2F1      | 0.623877888  | 0.001528 | 0.348333915  | 0.07674 | 0.536712839  | 0.006353 |
| MUC1        | -1.880673082 | 0.001531 | -0.628730871 | 0.28762 | -1.535132428 | 0.009548 |
| SBF1        | 0.526835348  | 0.001531 | 0.327750364  | 0.04861 | 0.196326908  | 0.237905 |
| ALDH7A1     | -0.483131419 | 0.001534 | -0.181392187 | 0.23052 | -0.329621711 | 0.029492 |
| KIAA0368    | 0.485297809  | 0.001535 | 0.502403358  | 0.00103 | 0.782316409  | 3.19E-07 |
| DDX11       | -0.445217112 | 0.001542 | -0.26745649  | 0.05632 | -0.108288555 | 0.437842 |
| FBXO45      | -0.304449619 | 0.001541 | -0.010933541 | 0.90724 | -0.06098858  | 0.51509  |
| MMP25       | 1.646197505  | 0.001541 | 1.417196994  | 0.00665 | 0.55341597   | 0.308857 |
| NABP1       | 0.544477879  | 0.001546 | 0.271949029  | 0.11399 | 0.244686905  | 0.155595 |
| C6orf57     | -0.506616654 | 0.001548 | -0.363195069 | 0.02124 | -0.248781268 | 0.111558 |
| TARBP1      | -0.597855384 | 0.001549 | -0.264011659 | 0.15959 | -0.29504935  | 0.116184 |
| AC010970.2  | -1.614948473 | 0.001552 | 0.329366627  | 0.51635 | -0.298433642 | 0.55683  |
| LMO2        | 1.526541554  | 0.001554 | 1.364951571  | 0.00457 | 0.546609696  | 0.264616 |
| HIPK2       | 0.552172318  | 0.001558 | 0.284692     | 0.10281 | 0.394660072  | 0.023705 |
| IP11-641D5. | -0.408638278 | 0.001558 | -0.275465104 | 0.03272 | -0.251227581 | 0.051407 |
| INRNPA1P4   | 0.803974662  | 0.001564 | 0.409534841  | 0.11301 | 0.678646134  | 0.007162 |
| CSE1L       | -0.389242758 | 0.001571 | -0.174542751 | 0.15548 | 0.022884744  | 0.852108 |
| ESCO2       | -0.784876188 | 0.001572 | -0.421182277 | 0.08824 | -0.568036039 | 0.021505 |
| HDDC3       | -0.734758419 | 0.001574 | -0.08544208  | 0.70456 | -0.299875306 | 0.186894 |
| VDAC3       | -0.251939816 | 0.001575 | 0.090450709  | 0.24934 | 0.013375837  | 0.864836 |
| EPM2A       | -2.013010162 | 0.00158  | -0.195399936 | 0.7037  | -0.112448972 | 0.828088 |
| RNF170      | -0.359542167 | 0.00158  | 0.107036093  | 0.33681 | -0.253851751 | 0.024052 |
| SNRNP40     | -0.345197407 | 0.001578 | -0.065225075 | 0.54669 | -0.142299829 | 0.18826  |
| SPPL2A      | 0.357114207  | 0.00158  | 0.434297793  | 0.00012 | 0.282033262  | 0.012299 |
| NIPAL3      | -0.366941678 | 0.001582 | -0.245276113 | 0.0322  | -0.420956062 | 0.000269 |
| AP3S1       | -0.302497127 | 0.001583 | 0.065216122  | 0.4902  | -0.099676757 | 0.292361 |
| GOLPH3      | 0.4020979    | 0.001587 | 0.453385963  | 0.00036 | 0.555080006  | 1.25E-05 |
| ZFYVE1      | 0.543222558  | 0.001587 | 0.525575646  | 0.00206 | 0.336175074  | 0.049403 |
| CHORDC1     | -0.364475044 | 0.001589 | -0.168362252 | 0.14182 | 0.090512534  | 0.427686 |
| LIF         | 0.962804322  | 0.001589 | 0.433481816  | 0.15541 | 1.128290597  | 0.000209 |
| RBMS1       | 0.281784709  | 0.0016   | 0.295899943  | 0.0009  | 0.424394111  | 1.83E-06 |
| TXNDC17     | -0.541996102 | 0.001599 | -0.148900648 | 0.38175 | -0.23493458  | 0.167018 |

|             |              |          |              |          |              |          |
|-------------|--------------|----------|--------------|----------|--------------|----------|
| ZSWIM1      | 0.356082352  | 0.001603 | 0.131687444  | 0.24269  | 0.197660915  | 0.077986 |
| BRX1        | -0.440912611 | 0.001609 | -0.151148924 | 0.274    | -0.087195545 | 0.527393 |
| ADCK3       | -0.603301421 | 0.001615 | -0.331470963 | 0.08157  | -0.619655605 | 0.001173 |
| CSMD1       | 2.619392155  | 0.001617 | 1.607136536  | 0.05498  | 1.186827466  | 0.178043 |
| ITFG3       | -0.382254762 | 0.001614 | -0.406866682 | 0.00078  | -0.396813443 | 0.001051 |
| SCAF4       | 0.36794973   | 0.001617 | -0.060189023 | 0.60885  | 0.083398745  | 0.476325 |
| ZNF582      | 0.833630895  | 0.001615 | 0.467459539  | 0.08197  | 0.119102506  | 0.656954 |
| P11-745A24  | 1.208391722  | 0.001621 | 0.592320493  | 0.13474  | 1.20009258   | 0.001507 |
| GKAP1       | -0.684945101 | 0.001627 | -0.344261635 | 0.09306  | -0.392959815 | 0.056727 |
| GLRX5       | -0.264027643 | 0.001635 | 0.05251207   | 0.52336  | -0.191420986 | 0.020905 |
| RFTN1       | 0.688187082  | 0.001636 | 0.341551804  | 0.11827  | 0.521790331  | 0.016898 |
| SLITRK3     | 1.534877618  | 0.001636 | 0.654457644  | 0.19096  | 0.567154696  | 0.249753 |
| NUP35       | -0.450945318 | 0.001638 | -0.154060474 | 0.27386  | -0.167943516 | 0.232523 |
| ELF1        | -0.398932991 | 0.001646 | -0.103518353 | 0.41006  | -0.2749686   | 0.029017 |
| MESDC2      | -0.273078805 | 0.001646 | -0.123808536 | 0.14998  | -0.114837073 | 0.180807 |
| PI4K2B      | -0.419361336 | 0.001649 | -0.025961397 | 0.84349  | -0.331018259 | 0.012261 |
| PHLDA1      | 0.66168047   | 0.001653 | 0.502942779  | 0.01677  | 0.327423967  | 0.119538 |
| P11-355I22. | -1.009723953 | 0.001653 | -0.757717427 | 0.01733  | -1.525920371 | 2.30E-06 |
| ZNF846      | -0.513155194 | 0.001651 | -0.176539035 | 0.27142  | -0.215459805 | 0.178777 |
| RGS7        | -1.104317896 | 0.001654 | -0.2325983   | 0.49092  | -1.038600072 | 0.002849 |
| FOXA2       | -0.910046886 | 0.001658 | -0.655763968 | 0.02292  | -0.648740883 | 0.024369 |
| FAM204A     | -0.298235337 | 0.001665 | -0.13393521  | 0.15312  | -0.153293131 | 0.101284 |
| MRFAP1L1    | -0.287482747 | 0.001664 | -0.148077152 | 0.10174  | 0.014450405  | 0.872427 |
| INPP5E      | 0.434291412  | 0.001673 | 0.188730552  | 0.1743   | 0.304891437  | 0.026236 |
| TPMT        | -0.373356352 | 0.001675 | -0.11496435  | 0.32465  | -0.238784287 | 0.04128  |
| AC243547.1  | 0.515801344  | 0.001678 | 0.075221307  | 0.64805  | 0.211558173  | 0.19792  |
| ESM1        | 3.273093689  | 0.001678 | 2.054180985  | 0.05114  | 0.284140192  | 0.797353 |
| IL18BP      | 0.652708757  | 0.001679 | 0.209253046  | 0.32437  | 0.537441923  | 0.0096   |
| MID1        | 0.630075917  | 0.001679 | 0.088427485  | 0.65979  | -0.084299563 | 0.674876 |
| NLGN2       | 0.735343731  | 0.001682 | -0.113706669 | 0.63123  | 0.069851152  | 0.766841 |
| ZNF702P     | -0.570157674 | 0.001682 | -0.489567205 | 0.00626  | -0.305817379 | 0.08551  |
| DENND2D     | -0.779146159 | 0.001696 | -0.823529    | 0.0009   | -0.656466505 | 0.008106 |
| ZNF718      | -0.791508765 | 0.001697 | -0.324496842 | 0.18403  | -0.375942374 | 0.12373  |
| C1QTNF6     | 0.440252431  | 0.001704 | 0.26707707   | 0.05678  | 0.113701     | 0.418499 |
| MID1IP1     | 0.714529404  | 0.001704 | 0.294591796  | 0.19804  | 0.223006267  | 0.329951 |
| NPIPA7      | 0.433472033  | 0.001714 | 0.139754637  | 0.31322  | 0.329232544  | 0.016997 |
| RPP30       | -0.307089616 | 0.001714 | -0.115017516 | 0.22996  | -0.14255797  | 0.135849 |
| NOTCH1      | 0.748981146  | 0.001719 | 0.355102617  | 0.13776  | 0.224854792  | 0.347584 |
| STEAP4      | 1.024905578  | 0.001727 | 1.593823831  | 9.70E-07 | 1.524960472  | 2.83E-06 |
| EXOC4       | -0.435942977 | 0.001734 | -0.553679535 | 6.75E-05 | -0.415579774 | 0.002751 |
| WDR11       | 0.314787195  | 0.001739 | 0.421750578  | 2.57E-05 | 0.349583641  | 0.000488 |
| PHF14       | -0.300230799 | 0.001747 | -0.359766568 | 0.00016  | -0.324931481 | 0.000638 |
| ZWINT       | -0.542171243 | 0.001759 | -0.256780805 | 0.1359   | -0.115108377 | 0.503452 |
| ADAMTS7     | 0.807881333  | 0.001766 | -0.019224806 | 0.94101  | 0.20238175   | 0.43505  |
| SYTL5       | -0.548945098 | 0.001766 | -0.137194256 | 0.43196  | -0.481004485 | 0.005987 |
| KLHL12      | -0.316190298 | 0.001772 | -0.013778544 | 0.88948  | -0.261263092 | 0.008936 |
| NFATC1      | 1.319316756  | 0.001778 | 1.069493951  | 0.01199  | 0.832218167  | 0.052329 |

|            |              |          |              |          |              |          |
|------------|--------------|----------|--------------|----------|--------------|----------|
| SMCO4      | -0.665262627 | 0.001783 | -0.096301646 | 0.63158  | -0.643686543 | 0.002047 |
| EHF        | 0.711667689  | 0.001792 | 0.928891462  | 4.52E-05 | 0.967526729  | 2.15E-05 |
| PPT1       | -0.433970954 | 0.001791 | -0.222299745 | 0.10798  | -0.085641337 | 0.534991 |
| PCDHA14    | -0.561907668 | 0.001795 | -0.278735971 | 0.11611  | -0.553055101 | 0.001947 |
| SNRN25     | -0.48177827  | 0.001814 | -0.222563947 | 0.14354  | -0.242981215 | 0.109539 |
| CTTN       | 0.196618847  | 0.001817 | 0.106937165  | 0.08902  | 0.142547201  | 0.023395 |
| ACTB       | 0.26306437   | 0.001822 | -0.043685076 | 0.60464  | 0.127241195  | 0.131522 |
| GABBR1     | 0.743522972  | 0.001829 | 0.249699471  | 0.29928  | 0.363777688  | 0.126682 |
| MSN        | 0.567607049  | 0.001837 | 0.398381577  | 0.02875  | 0.395044666  | 0.030095 |
| PABPC4     | -0.429559099 | 0.001838 | -0.254795789 | 0.06414  | -0.181228278 | 0.188125 |
| AC002398.9 | 1.42056493   | 0.001841 | 1.491017676  | 0.00103  | 1.419351145  | 0.001782 |
| PLA2G7     | 2.168555183  | 0.001842 | 1.939320729  | 0.00536  | 0.397341062  | 0.579475 |
| DTYMK      | -0.472918843 | 0.001847 | -0.253728395 | 0.08867  | -0.220509599 | 0.13707  |
| PRPF6      | -0.235129296 | 0.001847 | -0.159378398 | 0.03278  | -0.146996136 | 0.048352 |
| TCTN3      | -0.320659744 | 0.001846 | -0.280137233 | 0.00624  | -0.372992024 | 0.000275 |
| TRAF6      | 0.474637341  | 0.001847 | 0.480462402  | 0.00157  | 0.557431741  | 0.000234 |
| GDF10      | 1.736242542  | 0.001856 | 0.304385669  | 0.59616  | 0.592366001  | 0.297352 |
| ZDHHC8     | 0.534706263  | 0.001857 | 0.267280292  | 0.12257  | -0.095276369 | 0.586256 |
| NCOA6      | 0.491254965  | 0.001866 | 0.036253102  | 0.81926  | 0.265141431  | 0.093776 |
| VPS54      | -0.22848466  | 0.001875 | -0.005949297 | 0.9345   | -0.046359148 | 0.521699 |
| CT83       | 2.963229282  | 0.0019   | 2.715967014  | 0.00454  | 2.939668933  | 0.001918 |
| AEN        | -0.538540804 | 0.001911 | -0.46927516  | 0.00657  | -0.364156749 | 0.034436 |
| CLNS1A     | -0.295732175 | 0.00191  | -0.223550319 | 0.01838  | -0.279610085 | 0.003177 |
| CYTH1      | 0.430478524  | 0.001907 | 0.422928288  | 0.00228  | 0.627207768  | 5.64E-06 |
| GNRH2      | 2.615144079  | 0.001909 | 0.012064608  | 0.98934  | -1.761628978 | 0.077924 |
| TNFRSF10C  | 0.583410021  | 0.001918 | 0.307908244  | 0.10164  | 0.563165952  | 0.002723 |
| SIN3B      | 0.419980369  | 0.00192  | 0.054529031  | 0.68778  | 0.1437287    | 0.287985 |
| ETV1       | 0.662567292  | 0.001935 | 0.481903007  | 0.02414  | 0.806189661  | 0.000158 |
| NDC1       | -0.446313803 | 0.001937 | -0.21822971  | 0.12855  | -0.214520659 | 0.13504  |
| GLIPR1     | 0.96110918   | 0.001943 | 0.654609499  | 0.0348   | 0.745597175  | 0.016178 |
| CLEC2B     | 0.983176744  | 0.001953 | 1.014119624  | 0.00133  | 0.768947557  | 0.015372 |
| MLF2       | 0.259388555  | 0.001956 | -0.104029744 | 0.21639  | 0.015362616  | 0.854479 |
| ARMC1      | -0.279283917 | 0.001961 | -0.163685311 | 0.06683  | -0.023258517 | 0.793337 |
| MECOM      | -0.661695906 | 0.001962 | -0.259861239 | 0.22317  | -0.362722755 | 0.089126 |
| MRPL27     | -0.383646351 | 0.001974 | -0.176643269 | 0.1475   | -0.10847121  | 0.371857 |
| LATS2      | 0.580053944  | 0.00198  | 0.229066941  | 0.22213  | 0.534051384  | 0.004236 |
| POP4       | -0.384250346 | 0.001982 | -0.085495449 | 0.48245  | -0.110630636 | 0.362618 |
| RTN3       | -0.307222873 | 0.001997 | -0.272493495 | 0.0059   | -0.286473458 | 0.003784 |
| ARHGEF40   | 0.620969718  | 0.002016 | 0.476637408  | 0.0177   | 0.407167655  | 0.042939 |
| FAM84B     | -0.576924795 | 0.002013 | -0.184431974 | 0.32237  | -0.151093039 | 0.417435 |
| RPL9P7     | -1.789124768 | 0.002016 | -1.573669386 | 0.00577  | -1.291865028 | 0.021909 |
| SAP30      | -0.411292135 | 0.002017 | 0.027517623  | 0.82865  | 0.050149911  | 0.692054 |
| TRAF3      | 0.453203951  | 0.002013 | 0.172825508  | 0.23969  | 0.485871431  | 0.000897 |
| TRIM47     | 0.991233966  | 0.002018 | 0.808616261  | 0.01226  | 0.497934704  | 0.124757 |
| RMDN1      | -0.363220432 | 0.002019 | -0.177201261 | 0.12567  | -0.201457887 | 0.082543 |
| DICER1     | 0.408734502  | 0.002027 | 0.144579184  | 0.27486  | 0.482197375  | 0.000268 |
| TGFBR3     | 0.759606609  | 0.00203  | 0.327969012  | 0.18293  | 0.273574367  | 0.26677  |

|             |              |          |              |          |              |          |
|-------------|--------------|----------|--------------|----------|--------------|----------|
| PTP4A3      | 0.990619314  | 0.002038 | 0.086764272  | 0.78844  | 0.48153466   | 0.134488 |
| RPS25       | -0.32960493  | 0.002041 | -0.039852281 | 0.70797  | -0.009831286 | 0.926337 |
| ELF5        | -0.90926535  | 0.00205  | -1.130554364 | 0.00012  | -0.853494681 | 0.00332  |
| PGC         | -2.200119145 | 0.002051 | -1.265823086 | 0.07501  | -1.93690988  | 0.006536 |
| RPL22L1     | -0.61755165  | 0.00205  | 0.002873305  | 0.98846  | -0.24450695  | 0.219028 |
| CKS2        | -0.449054109 | 0.002055 | -0.120960828 | 0.40117  | -0.055475302 | 0.699633 |
| TOR1B       | 0.431045935  | 0.002063 | 0.499396861  | 0.00031  | 0.358031926  | 0.010184 |
| LSM11       | -0.268334513 | 0.002075 | -0.064256486 | 0.44409  | -0.009040243 | 0.913336 |
| ZSCAN2      | 0.562703507  | 0.002075 | 0.174095342  | 0.34282  | 0.474057161  | 0.0088   |
| IMMP1L      | -0.408775489 | 0.002083 | -0.106794961 | 0.40627  | -0.275010963 | 0.031327 |
| FAM118B     | 0.392456582  | 0.002091 | 0.591233875  | 2.73E-06 | 0.643482669  | 3.01E-07 |
| NDUFB2      | -0.415768201 | 0.002103 | -0.11733477  | 0.37894  | -0.1742892   | 0.191238 |
| CSNK2A1     | -0.336062875 | 0.002104 | -0.201874658 | 0.06415  | -0.265222638 | 0.014936 |
| ORC5        | -0.422024197 | 0.00211  | -0.115925869 | 0.38317  | -0.114545172 | 0.388656 |
| ARNT        | 0.353258506  | 0.002117 | 0.176903075  | 0.12334  | 0.223375297  | 0.051138 |
| GPN3        | -0.553651697 | 0.00212  | -0.0385308   | 0.82589  | -0.23481405  | 0.180747 |
| TSC1        | 0.282029204  | 0.00212  | 0.258501115  | 0.00474  | 0.300806166  | 0.000974 |
| SCRN1       | 0.248663583  | 0.002123 | 0.130479516  | 0.10655  | 0.361571568  | 7.33E-06 |
| ATP5SL      | 0.421391992  | 0.002127 | -0.011464891 | 0.93373  | 0.156640911  | 0.253645 |
| SPICE1      | -0.470704221 | 0.002127 | -0.228930631 | 0.13208  | -0.476544557 | 0.001762 |
| PTGS2       | 1.798036753  | 0.002133 | 1.388576112  | 0.01772  | 1.24038866   | 0.034166 |
| SNRNP200    | 0.278228914  | 0.002151 | 0.031204311  | 0.73056  | 0.139325336  | 0.123837 |
| ABCA12      | 1.890430674  | 0.002153 | 1.437142533  | 0.01995  | 1.085967948  | 0.079114 |
| BACH1       | 0.421544028  | 0.002154 | 0.173884331  | 0.20543  | 0.228071589  | 0.096725 |
| NUCB2       | -0.693622905 | 0.002157 | -0.084768551 | 0.70525  | -0.339655437 | 0.129637 |
| RP11-3J10.4 | 0.55925306   | 0.002166 | 0.564542613  | 0.00181  | 0.704117069  | 8.89E-05 |
| DMBT1       | 1.90687317   | 0.002168 | 2.618786337  | 2.53E-05 | 1.895851955  | 0.002298 |
| THBS3       | 0.547502348  | 0.002169 | 0.603910354  | 0.00063  | 0.516293349  | 0.003591 |
| CLK3        | 0.456455409  | 0.002174 | 0.103073035  | 0.48927  | 0.481628477  | 0.001203 |
| RP11-20I23. | 6.807466425  | 0.002177 | 5.351233517  | 0.01638  | 5.131625966  | 0.021453 |
| ATP5S       | -0.50565596  | 0.002186 | -0.251867203 | 0.12478  | -0.533870134 | 0.001102 |
| CLUAP1      | -0.487996562 | 0.002185 | -0.355146025 | 0.02441  | -0.41068328  | 0.009255 |
| RPS19       | -0.428424524 | 0.002183 | -0.275655638 | 0.04856  | -0.390156755 | 0.005245 |
| STIM1       | -0.489565893 | 0.002192 | -0.205747575 | 0.19739  | -0.232668769 | 0.144874 |
| HIST4H4     | -0.513945685 | 0.002201 | -0.195196608 | 0.24134  | -0.18486859  | 0.266765 |
| CTSS        | 0.726397895  | 0.002211 | 1.301750482  | 3.74E-08 | 0.328556267  | 0.166279 |
| MAP3K2      | 0.325477269  | 0.002211 | 0.24881559   | 0.01894  | 0.193885019  | 0.067457 |
| SHC2        | 0.569635378  | 0.002209 | 0.069162025  | 0.71092  | 0.352774904  | 0.057728 |
| SLC25A37    | 0.3895637    | 0.002211 | -0.01593748  | 0.90066  | 0.167891916  | 0.186403 |
| CHMP4BP1    | 1.554283312  | 0.002214 | 0.536028046  | 0.31629  | 0.822897751  | 0.11489  |
| TAF1C       | 0.544772313  | 0.002215 | 0.280319917  | 0.11598  | 0.242846768  | 0.173946 |
| TMEM106B    | -0.302571656 | 0.002223 | -0.123362385 | 0.21044  | -0.258075327 | 0.008875 |
| RORA        | 0.770314748  | 0.002231 | 0.599650824  | 0.01726  | 0.667168727  | 0.007998 |
| PPIE        | -0.290646069 | 0.002236 | -0.172360384 | 0.06402  | -0.219506849 | 0.017829 |
| 11-Sep      | 0.357098861  | 0.00224  | 0.385016369  | 0.00098  | 0.627112185  | 7.74E-08 |
| ACSM3       | -0.657246522 | 0.002243 | -0.359887383 | 0.09241  | -0.028593794 | 0.893291 |
| EPB41L3     | 0.891951871  | 0.002244 | 0.099009775  | 0.73578  | 0.689641822  | 0.018021 |

|             |              |          |              |          |              |          |
|-------------|--------------|----------|--------------|----------|--------------|----------|
| HDGFRP2     | 1.125641169  | 0.002246 | 0.499594435  | 0.17706  | 0.442283227  | 0.232221 |
| AKAP5       | 0.60806241   | 0.002248 | 0.185071476  | 0.35508  | 0.783626418  | 7.35E-05 |
| GUCY1A2     | -0.740946975 | 0.002251 | -0.76641126  | 0.00157  | -0.500200588 | 0.038882 |
| PPIH        | -0.325849361 | 0.00225  | -0.314438636 | 0.0028   | -0.172372209 | 0.096434 |
| APOPT1      | -0.37591953  | 0.002256 | -0.027235426 | 0.81968  | -0.0671429   | 0.576195 |
| RCN1        | 0.395176282  | 0.002262 | 0.327565442  | 0.01131  | 0.104727299  | 0.418415 |
| C12orf23    | -0.332435654 | 0.002268 | -0.082087144 | 0.44855  | -0.094350165 | 0.383777 |
| PEBP1       | -0.300597224 | 0.002268 | -0.291502991 | 0.003    | -0.220529577 | 0.024507 |
| ACAN        | 2.397501369  | 0.002274 | 0.673346889  | 0.40283  | 0.07971065   | 0.922058 |
| PLA2G6      | 0.661528743  | 0.002272 | 0.573195009  | 0.00843  | 0.45269508   | 0.036722 |
| PPP1R18     | 0.808428475  | 0.002274 | 0.403471327  | 0.12837  | 0.371951825  | 0.160418 |
| ZNF566      | -0.639272342 | 0.002272 | -0.423600295 | 0.04101  | -0.383117718 | 0.063675 |
| CABIN1      | -0.464503081 | 0.002277 | -0.480113617 | 0.0016   | -0.690878579 | 5.66E-06 |
| RAB31       | 0.846029644  | 0.002276 | 0.990609365  | 0.00034  | 0.797447167  | 0.003981 |
| SLFN5       | 0.816196746  | 0.002283 | 1.047619086  | 8.90E-05 | 0.756043214  | 0.004704 |
| TATDN1      | -0.389139784 | 0.002285 | -0.067550152 | 0.58991  | -0.133289616 | 0.287176 |
| EXOSC2      | -0.452241423 | 0.002288 | -0.231323419 | 0.1144   | -0.294546631 | 0.044768 |
| DNAJC24     | -0.453579696 | 0.002292 | -0.190074607 | 0.18756  | -0.187933749 | 0.19187  |
| HLA-E       | 0.426679013  | 0.002293 | 0.547569076  | 8.82E-05 | 0.306861082  | 0.028175 |
| RASA3       | 0.67880598   | 0.002292 | 0.311307209  | 0.16524  | 0.536654238  | 0.015527 |
| MRPL50P2    | 2.205051183  | 0.002295 | 1.273723107  | 0.08187  | 2.559725507  | 0.000368 |
| CALM1       | -0.325170895 | 0.002298 | -0.253058356 | 0.01754  | -0.196736987 | 0.06473  |
| IRS1        | 0.445563658  | 0.002299 | -0.295153928 | 0.04402  | 0.211444928  | 0.148012 |
| TNFRSF1B    | 0.950600003  | 0.002299 | 0.708505786  | 0.02254  | 0.201494123  | 0.525037 |
| POLE2       | -0.71900256  | 0.002302 | -0.225062217 | 0.33234  | -0.160712229 | 0.487221 |
| EM256-PLSC  | 0.655116892  | 0.002308 | 0.179608293  | 0.40796  | 0.039892219  | 0.854305 |
| DDA1        | 0.467706643  | 0.00232  | 0.161656377  | 0.2938   | 0.193661905  | 0.207509 |
| MRPS31      | -0.3458995   | 0.002322 | -0.006951028 | 0.94926  | 0.091746256  | 0.397697 |
| AC006978.6  | -0.621438737 | 0.002329 | -0.226347097 | 0.24135  | -0.188136005 | 0.32607  |
| ING2        | -0.437448842 | 0.002329 | -0.194404649 | 0.16659  | -0.284477442 | 0.043178 |
| LTA4H       | -0.374460925 | 0.00233  | -0.251644671 | 0.04015  | -0.313940529 | 0.010479 |
| SH3D21      | 0.699121174  | 0.002328 | 0.440579026  | 0.05544  | 0.136387012  | 0.555051 |
| AC004980.1  | 1.573424163  | 0.002336 | 0.85824673   | 0.1086   | 0.439088178  | 0.423347 |
| MCM5        | -0.501169672 | 0.002343 | -0.434404667 | 0.00812  | -0.447486588 | 0.006383 |
| PRKAR1B     | -0.372604886 | 0.002345 | -0.401249464 | 0.00098  | -0.454473442 | 0.000232 |
| ZNF706      | -0.320820672 | 0.002348 | -0.034164607 | 0.74204  | -0.03226367  | 0.755251 |
| TNIP2       | 0.444905803  | 0.002351 | 0.505902035  | 0.00048  | 0.42249971   | 0.003589 |
| TMPO        | -0.394586063 | 0.002354 | -0.163177688 | 0.20767  | -0.097119427 | 0.453147 |
| UHMK1       | -0.200305356 | 0.002358 | -0.043280553 | 0.50663  | -0.185724197 | 0.004484 |
| CACNA1C     | 0.845501891  | 0.00236  | 0.311192914  | 0.2651   | 0.397040095  | 0.154226 |
| FYB         | -2.15866535  | 0.002364 | -0.945679447 | 0.13285  | -1.49815089  | 0.030803 |
| FIS1        | -0.378797933 | 0.002366 | -0.194445962 | 0.11398  | -0.18547841  | 0.131134 |
| IP1-182O16. | 1.8604643    | 0.002373 | 1.53440062   | 0.01286  | 1.4230687    | 0.021369 |
| MAML2       | 0.449504315  | 0.002377 | -0.083558146 | 0.5738   | 0.136823253  | 0.355417 |
| SLC30A9     | -0.357581062 | 0.00238  | -0.015547043 | 0.89448  | -0.008606559 | 0.941467 |
| FBLIM1      | 0.422286815  | 0.002384 | -0.101832435 | 0.46415  | 0.29125026   | 0.035987 |
| P11-261C10  | 1.004919491  | 0.002386 | 0.285270607  | 0.39876  | 0.029791127  | 0.930465 |

|             |              |          |              |          |              |          |
|-------------|--------------|----------|--------------|----------|--------------|----------|
| LCAT        | 0.653350989  | 0.002391 | 0.365345602  | 0.09124  | 0.53918146   | 0.01143  |
| MAEA        | 0.282471971  | 0.002394 | 0.193020856  | 0.03656  | 0.284559865  | 0.002016 |
| UBE2V2      | -0.26314661  | 0.002401 | -0.077545063 | 0.36521  | -0.024257968 | 0.776295 |
| CYTIP       | -1.523212986 | 0.002419 | -0.254436671 | 0.59952  | -1.08155067  | 0.027766 |
| ITGAE       | -0.650843794 | 0.002446 | -0.226725777 | 0.2811   | -0.163133023 | 0.43511  |
| SCARF2      | 1.166954871  | 0.002446 | 0.388777362  | 0.32483  | 0.547095961  | 0.161649 |
| CDC37       | 0.324033051  | 0.002448 | 0.287198159  | 0.00713  | 0.264641867  | 0.013253 |
| HNRNPR      | -0.262895813 | 0.002465 | -0.220102287 | 0.0111   | 0.048753117  | 0.57304  |
| KIF9        | -0.661437002 | 0.002465 | -0.470259186 | 0.0292   | -0.392134522 | 0.067274 |
| CLDN2       | -1.237012606 | 0.00247  | -0.735125163 | 0.07106  | -1.405897909 | 0.000578 |
| CHMP1B2P    | -1.030863898 | 0.002481 | -0.235792009 | 0.46886  | -1.363765218 | 6.94E-05 |
| RPSAP53     | -0.734660186 | 0.00249  | -0.009926986 | 0.96663  | -0.258144599 | 0.27849  |
| HERPUD2     | 0.46453689   | 0.002495 | 0.384781706  | 0.01208  | 0.433182915  | 0.004682 |
| A16c-17H1.  | -0.816747395 | 0.002494 | -0.075471712 | 0.76449  | -0.21359525  | 0.398719 |
| LYSMD4      | -0.542218902 | 0.002511 | -0.363748937 | 0.04037  | -0.268234697 | 0.128995 |
| TMEM242     | -0.427654624 | 0.002529 | -0.34204859  | 0.01365  | -0.295709885 | 0.032959 |
| TBC1D10A    | 0.512143274  | 0.00253  | 0.4135856    | 0.01451  | 0.089399507  | 0.600114 |
| MRPS26      | -0.466688164 | 0.002533 | -0.397750025 | 0.00934  | -0.778677601 | 5.13E-07 |
| ANPEP       | 2.745586502  | 0.002541 | 0.811020037  | 0.37296  | 0.007829819  | 0.993143 |
| OR2I1P      | 2.94805712   | 0.002542 | 3.902964532  | 4.46E-05 | 1.853527113  | 0.06555  |
| DTL         | -0.664000817 | 0.002545 | -0.668627557 | 0.0023   | -0.649762058 | 0.003037 |
| DEF6        | -0.614462762 | 0.002557 | -0.459457438 | 0.02121  | -0.380450464 | 0.056226 |
| NCOA2       | 0.294902134  | 0.002557 | 0.250131936  | 0.01028  | 0.184420897  | 0.058327 |
| IP11-204M4. | -1.619758119 | 0.002556 | -0.194086878 | 0.67935  | -0.280349622 | 0.551062 |
| TNFRSF11B   | 1.088791658  | 0.002559 | 1.389978034  | 0.00012  | 0.72036259   | 0.046108 |
| MAVS        | 0.239160281  | 0.002566 | -0.028454294 | 0.72008  | 0.028725179  | 0.717106 |
| MRPL11      | -0.383334038 | 0.002566 | -0.234549386 | 0.06127  | -0.254060621 | 0.042819 |
| AMOTL2      | 0.659229975  | 0.002573 | 0.083097546  | 0.70466  | 0.535165862  | 0.014333 |
| PATZ1       | -0.335922032 | 0.002576 | -0.374086035 | 0.00072  | -0.366319747 | 0.000936 |
| FBXO21      | -0.338505145 | 0.002579 | -0.278901983 | 0.01245  | -0.231133503 | 0.037854 |
| KLC3        | 1.042095225  | 0.00258  | 0.72756926   | 0.03764  | 0.750642203  | 0.030411 |
| JPH3        | 1.091416036  | 0.002585 | 0.900554911  | 0.01286  | 0.511899815  | 0.168695 |
| CD40        | 1.733838051  | 0.002593 | 2.502558265  | 1.03E-05 | 1.254651604  | 0.02949  |
| KIF21A      | -0.471930193 | 0.002595 | -0.178284082 | 0.25366  | -0.178227956 | 0.253664 |
| MCL1        | 0.45462361   | 0.002594 | 0.493488047  | 0.00107  | 0.467398013  | 0.001942 |
| MAML1       | 0.600062582  | 0.002603 | 0.040134732  | 0.84052  | 0.361631198  | 0.069457 |
| NAMPTL      | 1.078093051  | 0.002603 | 0.990189695  | 0.00567  | 0.981337345  | 0.006117 |
| STRN4       | 0.298264228  | 0.002601 | 0.079131576  | 0.42563  | 0.143111408  | 0.148658 |
| PUS7        | -0.543388644 | 0.002618 | -0.418286434 | 0.02011  | -0.258964758 | 0.148941 |
| TRIT1       | -0.439198779 | 0.002637 | -0.329346765 | 0.02269  | -0.143324761 | 0.320048 |
| RFT1        | -0.403138409 | 0.002641 | -0.17777929  | 0.18102  | -0.210971344 | 0.111899 |
| TMEM189     | 0.425416492  | 0.002643 | 0.243060594  | 0.0856   | 0.459500974  | 0.001135 |
| ARHGEF37    | 0.984156488  | 0.002659 | 0.955521482  | 0.00328  | 0.5950967    | 0.07015  |
| CEACAM1     | 1.288680075  | 0.002656 | 0.477931735  | 0.26537  | 0.2680894    | 0.53216  |
| RNF138      | -0.388477868 | 0.002657 | -0.335566133 | 0.00884  | -0.04096765  | 0.748051 |
| LRP2        | 1.718232841  | 0.00266  | 1.429796903  | 0.01234  | 1.651434969  | 0.003808 |
| ARHGAP10    | -0.362666169 | 0.002668 | -0.290572658 | 0.01469  | -0.258844315 | 0.030058 |

|          |              |          |              |          |              |          |
|----------|--------------|----------|--------------|----------|--------------|----------|
| CPD      | -0.397842716 | 0.002678 | -0.315596448 | 0.01718  | -0.329013005 | 0.012986 |
| STARD7   | -0.301373138 | 0.002679 | -0.206116125 | 0.03949  | -0.053383892 | 0.593577 |
| ABHD17B  | -0.364893582 | 0.002684 | -0.126487566 | 0.28864  | -0.160349788 | 0.178232 |
| CCDC120  | 0.667146634  | 0.002682 | -0.009515491 | 0.96635  | 0.094476319  | 0.674354 |
| LARS2    | -0.359204402 | 0.002683 | -0.062594371 | 0.59805  | -0.231742485 | 0.050842 |
| HIST1H4G | -1.101657861 | 0.002697 | -0.379197136 | 0.29136  | 0.01146778   | 0.974374 |
| FYCO1    | -0.345935817 | 0.002701 | -0.176366499 | 0.1223   | -0.301686743 | 0.008349 |
| NSRP1    | 0.47405798   | 0.002711 | 0.106374994  | 0.5025   | 0.148894513  | 0.344549 |
| OVCA2    | 0.800940316  | 0.002712 | 0.714639991  | 0.00735  | 0.600300488  | 0.024511 |
| TBC1D2B  | 0.477505018  | 0.002709 | 0.402343605  | 0.01138  | 0.331216915  | 0.03732  |
| WDFY1    | -0.210058332 | 0.00272  | -0.06134507  | 0.37765  | -0.069999837 | 0.313814 |
| MOB1A    | -0.205833213 | 0.002724 | 0.004457472  | 0.94798  | 0.018607386  | 0.785239 |
| SLC6A20  | 1.653620773  | 0.002723 | 1.175184646  | 0.03462  | 0.61651308   | 0.267177 |
| JAK3     | 0.889954379  | 0.00273  | 0.649638662  | 0.02874  | 0.572786014  | 0.053892 |
| DNAL4    | -0.454373664 | 0.00275  | -0.297924683 | 0.04295  | -0.296155114 | 0.044465 |
| PRPF40A  | -0.272741018 | 0.002754 | -0.183703782 | 0.04323  | 0.060938678  | 0.501801 |
| MYCBP    | -0.469176019 | 0.002769 | -0.121511125 | 0.43458  | -0.266111398 | 0.087243 |
| TBC1D17  | 0.446499281  | 0.002785 | 0.16237467   | 0.27988  | -0.040365558 | 0.789219 |
| AP3M2    | -0.454922664 | 0.00279  | -0.28280754  | 0.06086  | -0.045682807 | 0.760994 |
| IL2RG    | 0.869702535  | 0.0028   | 0.335347274  | 0.25095  | 0.527217233  | 0.070308 |
| MMADHC   | -0.273734268 | 0.0028   | 0.057378329  | 0.52607  | -0.094040777 | 0.299805 |
| ABHD10   | -0.361869356 | 0.002807 | -0.201151193 | 0.08983  | -0.164861018 | 0.164453 |
| C19orf43 | 0.310424335  | 0.002806 | 0.060241396  | 0.56243  | 0.239737236  | 0.020693 |
| GPR160   | -0.609913524 | 0.002808 | -0.148164026 | 0.46577  | -0.196441675 | 0.333624 |
| PMPCB    | -0.293539494 | 0.002806 | -0.065340066 | 0.50128  | -0.0498347   | 0.607374 |
| MAP1LC3B | 0.525051657  | 0.002811 | 0.486012547  | 0.0056   | 0.622664857  | 0.000376 |
| TMEM138  | 0.448270692  | 0.002817 | 0.050149678  | 0.73813  | 0.110901108  | 0.459548 |
| ARNTL    | 0.757254726  | 0.002827 | 0.883387501  | 0.00043  | 0.784932059  | 0.001807 |
| NEDD8    | -0.231648141 | 0.002832 | -0.1671492   | 0.0295   | -0.09652336  | 0.206892 |
| RPL13A   | -0.367430263 | 0.002831 | -0.196223908 | 0.11081  | -0.331714701 | 0.007023 |
| SYNJ2    | 0.412987261  | 0.002836 | 0.127756944  | 0.35604  | 0.383928727  | 0.005414 |
| RPSAP58  | -0.843795067 | 0.002844 | 0.307097455  | 0.27245  | 0.332642978  | 0.234411 |
| DDAH1    | -0.327691693 | 0.002859 | -0.391927615 | 0.00036  | -0.345906137 | 0.001617 |
| GLYCTK   | -0.614009423 | 0.002857 | -0.564017735 | 0.00592  | -0.559856899 | 0.006194 |
| RPLP0P6  | -1.739896546 | 0.002858 | -0.095821257 | 0.85263  | -0.724088445 | 0.171474 |
| TRIM62   | 0.705890266  | 0.002858 | 0.4193954    | 0.07682  | 0.157047635  | 0.508937 |
| CASP6    | -0.396619842 | 0.002866 | 0.033022266  | 0.7981   | -0.243416205 | 0.061227 |
| RAD54L   | -0.753719419 | 0.00287  | -0.754719969 | 0.00275  | -0.529147327 | 0.0348   |
| PHF23    | 0.393421412  | 0.002877 | 0.127591605  | 0.33257  | 0.356541926  | 0.006637 |
| IRS4     | 1.823326007  | 0.00288  | 2.903368282  | 1.65E-06 | 2.258683441  | 0.000203 |
| ZNF165   | -0.60190523  | 0.002882 | -0.319542954 | 0.10298  | -0.15187831  | 0.432718 |
| CDC37L1  | -0.511660171 | 0.002885 | -0.174856206 | 0.3007   | -0.175065672 | 0.299008 |
| MPP6     | -0.645112739 | 0.002889 | -0.228530822 | 0.28818  | -0.061120603 | 0.776192 |
| COL15A1  | 1.088331598  | 0.002899 | 0.285418951  | 0.43854  | 0.477713722  | 0.212989 |
| E2F8     | -0.601569317 | 0.0029   | -0.179410241 | 0.36886  | -0.304862954 | 0.12717  |
| FEN1     | -0.535600135 | 0.0029   | -0.382473695 | 0.03257  | -0.182972357 | 0.305771 |
| GPR50    | 1.928282452  | 0.002905 | 0.424300826  | 0.51728  | 1.882738605  | 0.003612 |

|            |              |          |              |          |              |          |
|------------|--------------|----------|--------------|----------|--------------|----------|
| EIF4ENIF1  | 0.429790669  | 0.002923 | 0.145296331  | 0.31454  | 0.507055865  | 0.000419 |
| MPC2       | -0.413443493 | 0.002924 | -0.178250179 | 0.19607  | -0.300205716 | 0.02953  |
| ZNF107     | -0.509198343 | 0.002922 | -0.321443154 | 0.05689  | -0.131947017 | 0.430739 |
| ISG20      | 0.793167901  | 0.002928 | 0.506735787  | 0.05768  | 0.873147291  | 0.001029 |
| TRAPPC6A   | -0.536473775 | 0.002929 | -0.455384644 | 0.01067  | -0.646291495 | 0.000323 |
| RBBP8NL    | -0.848547857 | 0.002935 | -0.700219917 | 0.01277  | -0.761934079 | 0.006752 |
| DBN1       | 0.663950589  | 0.002942 | 0.186587779  | 0.40342  | 0.481989837  | 0.030794 |
| PLSCR1     | 0.377278884  | 0.002942 | 0.624055005  | 7.77E-07 | 0.56914861   | 6.73E-06 |
| MTIF2      | -0.431637472 | 0.002955 | 0.018323917  | 0.89861  | -0.206713741 | 0.151045 |
| TRIM16     | 0.534392637  | 0.00296  | 0.539365913  | 0.00265  | 0.504447191  | 0.004954 |
| SEC61A1    | 0.235420549  | 0.002976 | 0.063226024  | 0.42449  | 0.093341747  | 0.238527 |
| FAM167A    | 0.897924229  | 0.002997 | 0.842575602  | 0.00513  | 0.963215841  | 0.001289 |
| PARP8      | 0.377751584  | 0.002997 | 0.475590369  | 0.00018  | 0.393234727  | 0.001911 |
| TRAPPC1    | 0.31228011   | 0.002997 | -0.016969348 | 0.87272  | 0.044491096  | 0.672849 |
| VWA8       | -0.545890625 | 0.002996 | -0.676633158 | 0.00022  | -0.577275832 | 0.001625 |
| NDUFC2     | -0.308029378 | 0.003007 | -0.181274001 | 0.07864  | -0.183895432 | 0.074067 |
| TPT1       | -0.317974148 | 0.003009 | 0.023613244  | 0.82557  | -0.103289218 | 0.335061 |
| HTATSF1    | -0.267856806 | 0.003015 | -0.184467285 | 0.0394   | -0.093187525 | 0.296429 |
| POLH       | -0.45094711  | 0.003026 | -0.410345449 | 0.00681  | -0.375667881 | 0.012869 |
| P11-84C13. | -0.479362837 | 0.003025 | -0.185200895 | 0.24488  | -0.059969634 | 0.705246 |
| FGFR1      | 0.731134885  | 0.003032 | 0.427925555  | 0.0827   | 0.407892256  | 0.098215 |
| GNPAT      | -0.298126908 | 0.003039 | -0.178935567 | 0.07281  | -0.072495224 | 0.465497 |
| IMPA2      | -0.489223539 | 0.003038 | -0.444411822 | 0.00689  | -0.599736371 | 0.000273 |
| RNASSET2   | -0.447940345 | 0.003044 | -0.243357812 | 0.10513  | -0.585154949 | 0.000107 |
| GNRHR2P1   | -1.213328575 | 0.003053 | -0.347721375 | 0.38258  | -0.245870769 | 0.535864 |
| MRPL21     | -0.370372578 | 0.003066 | 0.023976073  | 0.84319  | -0.100991989 | 0.405876 |
| SYNGAP1    | 1.034960496  | 0.003067 | -0.201065994 | 0.57891  | 0.607098095  | 0.082334 |
| HHLA2      | 1.275899526  | 0.003082 | 1.406021386  | 0.0011   | 1.078020021  | 0.012389 |
| TMPRSS2    | 0.747072469  | 0.003086 | 0.826476409  | 0.00106  | 0.543911998  | 0.031183 |
| UBASH3A    | 2.192494521  | 0.003096 | 2.135551044  | 0.00369  | 1.965594946  | 0.008027 |
| SUZ12      | -0.350659558 | 0.003099 | -0.106549849 | 0.36586  | -0.057660952 | 0.624    |
| EPB41L1    | -0.668783369 | 0.003104 | -0.63725379  | 0.00484  | -0.408795466 | 0.070334 |
| ADCK2      | -0.574853786 | 0.003113 | -0.13219103  | 0.48999  | -0.400227069 | 0.038004 |
| LRRC3      | 0.493862546  | 0.003113 | -0.019646358 | 0.90892  | 0.200779531  | 0.231389 |
| RAPGEF2    | 0.331347652  | 0.003116 | 0.269078351  | 0.01624  | 0.392494869  | 0.000444 |
| ATF7IP2    | -0.481080503 | 0.00312  | -0.269115406 | 0.0968   | -0.464964308 | 0.004157 |
| HARS2      | -0.281007938 | 0.003121 | -0.024326273 | 0.79311  | -0.207467347 | 0.026578 |
| MAP2K2     | 0.439309201  | 0.003121 | 0.207340013  | 0.16292  | 0.011640832  | 0.937642 |
| TLE3       | 0.73907846   | 0.003122 | 0.270440135  | 0.28048  | 0.422765548  | 0.091185 |
| KCNA1      | 1.923253431  | 0.003125 | 1.484454057  | 0.02443  | 1.470358996  | 0.025349 |
| DCTN2      | 0.261342936  | 0.003127 | 0.183983641  | 0.03664  | 0.338798895  | 0.000113 |
| PIGV       | -0.373736051 | 0.003135 | -0.02480411  | 0.84057  | -0.414645208 | 0.000874 |
| RPS7P11    | -1.184859777 | 0.003135 | -0.140468255 | 0.70866  | -0.712015398 | 0.063867 |
| PHKA2      | -0.484034018 | 0.003164 | -0.358955713 | 0.02833  | -0.355098075 | 0.030077 |
| TOMM5      | -0.338918371 | 0.003173 | 0.01674769   | 0.88321  | -0.064761785 | 0.570102 |
| C2CD4C     | 1.24931483   | 0.00319  | 0.76547865   | 0.07326  | 0.877422137  | 0.039069 |
| NLN        | -0.349231692 | 0.003189 | -0.302181707 | 0.01036  | -0.22906682  | 0.05117  |



|         |              |          |              |          |              |          |
|---------|--------------|----------|--------------|----------|--------------|----------|
| FBXO5   | -0.41749373  | 0.0032   | -0.244520554 | 0.08136  | -0.035934268 | 0.796758 |
| SLC10A2 | 3.060995838  | 0.003205 | 0.85557724   | 0.4163   | 0.504113679  | 0.633354 |
| KLHL29  | 0.453639818  | 0.003208 | -0.039711813 | 0.79804  | 0.349761581  | 0.022565 |
| FAM214B | 0.657068747  | 0.003211 | 0.511401478  | 0.02177  | 0.511601821  | 0.021717 |
| PLEKHM1 | 0.73472875   | 0.003217 | 0.054480557  | 0.82628  | 0.308627593  | 0.213696 |
| CAMK2A  | 1.535456376  | 0.00322  | 0.087462008  | 0.87393  | 0.555552909  | 0.300978 |
| SEMA3C  | 0.62842943   | 0.003222 | 1.134538976  | 1.02E-07 | 0.530201499  | 0.01292  |
| RPL30   | -0.317235041 | 0.003231 | -0.149942045 | 0.16361  | -0.063615606 | 0.554406 |
| GRSF1   | -0.241170701 | 0.003232 | -0.131824069 | 0.10554  | -0.141384589 | 0.082752 |
| PRIM1   | -0.771366804 | 0.003242 | -0.585041175 | 0.0238   | -0.304519416 | 0.237492 |
| SNRPD2  | -0.36363517  | 0.003253 | -0.2146649   | 0.08121  | -0.191005149 | 0.120404 |
| GTF3A   | -0.386023395 | 0.003256 | -0.193149272 | 0.13924  | -0.319510489 | 0.014427 |
| MMD     | 0.432606519  | 0.003259 | 0.275397919  | 0.06084  | 0.433244843  | 0.003114 |
| TES     | -0.25672909  | 0.00326  | -0.090958993 | 0.29536  | -0.140068823 | 0.106628 |
| UNC93A  | -1.152797949 | 0.003261 | -0.975915234 | 0.0124   | -1.281239029 | 0.001039 |
| PIFO    | -1.242055594 | 0.003277 | -0.134611573 | 0.74167  | -0.627973307 | 0.125725 |
| MYO1H   | 1.868766252  | 0.003285 | 1.173257773  | 0.07463  | 1.579157707  | 0.012809 |
| MICALL1 | 0.379947332  | 0.003287 | 0.203563576  | 0.11584  | 0.252982877  | 0.050668 |
| APMAP   | -0.33237394  | 0.003304 | -0.106911693 | 0.34164  | -0.216173836 | 0.054711 |
| VPS37B  | 0.401366051  | 0.003303 | 0.210304953  | 0.12358  | 0.292196946  | 0.0322   |
| PODN    | 0.982921561  | 0.00332  | 0.365097156  | 0.28693  | 0.790374638  | 0.017989 |
| DENND1A | 0.456515872  | 0.003334 | 0.007360585  | 0.96239  | 0.150475704  | 0.333988 |
| FAIM3   | 1.248281715  | 0.003348 | 1.505033999  | 0.00038  | 1.002434771  | 0.018962 |
| FUCA2   | -0.466278484 | 0.003346 | -0.406101391 | 0.01036  | -0.417589805 | 0.008366 |
| NOL11   | -0.316873516 | 0.003353 | -0.126104548 | 0.23866  | -0.095751555 | 0.369974 |
| PSPH    | -0.414862585 | 0.003354 | -0.444025711 | 0.00157  | -0.844228943 | 2.97E-09 |
| TUBA1A  | 0.790858321  | 0.003357 | 0.425765063  | 0.11437  | 0.73486123   | 0.006417 |
| PDE4DIP | -0.45142046  | 0.003367 | -0.1086598   | 0.47679  | -0.370409768 | 0.015647 |
| PDLIM1  | 0.361128029  | 0.003366 | 0.334668333  | 0.00647  | 0.367662314  | 0.002757 |
| CLN5    | -0.660826523 | 0.003373 | -0.200167686 | 0.36643  | -0.39298707  | 0.076841 |
| KXD1    | 0.404209474  | 0.003381 | 0.277563685  | 0.04385  | 0.40137852   | 0.003503 |
| RUNX1T1 | 0.99494258   | 0.003383 | 0.575465518  | 0.0905   | 0.673685182  | 0.047202 |
| ACBD6   | -0.347502751 | 0.003398 | -0.265117311 | 0.02411  | -0.289067936 | 0.013855 |
| ANKRD49 | -0.393422947 | 0.003394 | 0.045784896  | 0.72915  | -0.186818907 | 0.157143 |
| DDX50   | -0.270801868 | 0.003393 | -0.081700084 | 0.37124  | -0.050625601 | 0.578638 |
| ODAM    | -1.794419621 | 0.003397 | -0.734041845 | 0.22494  | -0.926600292 | 0.125809 |
| WDR3    | -0.46027847  | 0.003397 | -0.255816651 | 0.10126  | -0.234911357 | 0.132211 |
| TCF7L2  | 0.720470591  | 0.003401 | 0.091331237  | 0.71094  | 0.584417961  | 0.01751  |
| RBBP9   | -0.471761796 | 0.003406 | 0.064428847  | 0.68715  | -0.18193628  | 0.25557  |
| GLB1    | -0.458343381 | 0.00341  | -0.412808484 | 0.00829  | -0.650724323 | 3.20E-05 |
| NQO2    | -0.461463006 | 0.00341  | -0.674776595 | 1.84E-05 | -0.558156739 | 0.000363 |
| CALD1   | 0.556500174  | 0.003416 | 0.16893558   | 0.37424  | 0.479700631  | 0.011601 |
| ZNF33A  | -0.326739916 | 0.003421 | -0.247477761 | 0.0258   | -0.092874768 | 0.402091 |
| MRPL23  | -0.633550246 | 0.003429 | -0.349513231 | 0.09972  | -0.477025511 | 0.025145 |
| DLK1    | 1.684208857  | 0.003436 | 1.202407285  | 0.03676  | 0.486174394  | 0.3987   |
| PTGR2   | -0.566037716 | 0.003449 | -0.2060652   | 0.28263  | -0.362476045 | 0.058244 |
| SQRDL   | 0.463777942  | 0.003452 | 0.70115519   | 8.84E-06 | 0.281200093  | 0.075838 |

|             |              |          |              |          |              |          |
|-------------|--------------|----------|--------------|----------|--------------|----------|
| NCR3LG1     | 0.515959518  | 0.003457 | 0.055921079  | 0.75235  | 0.455851974  | 0.009629 |
| RPS24       | -0.392595768 | 0.003495 | -0.164234683 | 0.22165  | -0.244781418 | 0.06853  |
| NDN         | 0.376928611  | 0.003499 | 0.374675562  | 0.00358  | 0.372252786  | 0.003769 |
| RCAN3       | -0.678232394 | 0.003498 | -0.607132365 | 0.0088   | -0.2908997   | 0.209356 |
| !P11-38O23. | -1.397262065 | 0.003517 | 0.122846387  | 0.76772  | -0.69387912  | 0.111789 |
| SLC9A1      | 0.791288802  | 0.003521 | -0.067420892 | 0.80533  | 0.145057903  | 0.596222 |
| TENM3       | 0.948236074  | 0.00353  | 0.336588208  | 0.30066  | 0.731352915  | 0.024432 |
| COPS4       | -0.369310193 | 0.003539 | -0.128764126 | 0.30427  | 0.129533185  | 0.300052 |
| GABPA       | -0.233054783 | 0.003538 | 0.004269217  | 0.95674  | 0.009453937  | 0.90416  |
| STAG3L1     | 1.006259449  | 0.003536 | 0.415717588  | 0.23901  | -0.233032672 | 0.528804 |
| !P11-742N3. | -1.021126788 | 0.003543 | 0.534020962  | 0.11699  | -0.569177414 | 0.09904  |
| ENTPD3      | -0.813048709 | 0.003556 | -0.369442627 | 0.17456  | -0.680653977 | 0.013634 |
| NAA60       | 0.413928569  | 0.003556 | 0.155418485  | 0.27347  | 0.329185918  | 0.020133 |
| VILL        | -0.520073343 | 0.003581 | -0.416739582 | 0.01929  | -0.641394489 | 0.000323 |
| ZNFX1       | 0.326019961  | 0.003594 | 0.317005092  | 0.00452  | 0.255887911  | 0.022002 |
| ZNF77       | -0.495462256 | 0.003611 | -0.261674843 | 0.10836  | -0.314470491 | 0.052007 |
| OXLD1       | -0.575426569 | 0.003625 | -0.512123552 | 0.00785  | -0.683257903 | 0.000427 |
| CCHCR1      | -0.579251522 | 0.003632 | -0.434612985 | 0.02741  | -0.505699417 | 0.010291 |
| IGF2        | 0.530868756  | 0.003631 | -0.089199027 | 0.62509  | 0.242975748  | 0.183123 |
| RAB11FIP5   | 0.482783588  | 0.003633 | 0.009835066  | 0.95298  | 0.072847441  | 0.662642 |
| TNNI3       | -0.982533578 | 0.003632 | -0.954809904 | 0.00399  | -0.353337852 | 0.249803 |
| ADD3        | -0.298397723 | 0.003639 | -0.138394146 | 0.17664  | -0.249024815 | 0.015073 |
| GBAS        | -0.318923348 | 0.003641 | -0.183753411 | 0.09193  | -0.319299293 | 0.003459 |
| GBP2        | 0.560623491  | 0.003645 | 0.549055492  | 0.00439  | 0.687140292  | 0.000362 |
| LSM4        | -0.419958578 | 0.003656 | -0.267463298 | 0.06261  | -0.289778125 | 0.043584 |
| CYP3A5      | 0.631815597  | 0.00367  | 0.547596067  | 0.01179  | 0.620660324  | 0.0043   |
| KIF7        | 0.758435661  | 0.003668 | 0.230292472  | 0.38052  | 0.12675769   | 0.628284 |
| TSEN2       | -0.709728838 | 0.00367  | -0.61584889  | 0.01139  | -0.34357786  | 0.157194 |
| GNA12       | 0.384802705  | 0.003675 | 0.076186576  | 0.56595  | 0.156486387  | 0.236249 |
| TMEM130     | 0.952259162  | 0.003679 | 1.111689632  | 0.00057  | 0.416010471  | 0.205971 |
| !P11-432B6. | -5.143241001 | 0.00369  | -0.458039067 | 0.7572   | -0.140671977 | 0.923975 |
| SPTLC1      | -0.235703649 | 0.0037   | -0.06565135  | 0.41201  | -0.177971971 | 0.026416 |
| MADD        | 0.375509039  | 0.003703 | 0.244436542  | 0.05833  | 0.301611611  | 0.01946  |
| HSD17B1     | 0.442595054  | 0.003707 | 0.065352281  | 0.6685   | -0.028716331 | 0.850052 |
| RRNAD1      | -0.505341222 | 0.003715 | 0.022728252  | 0.89418  | -0.280026104 | 0.102307 |
| SMYD3       | -0.587705325 | 0.003721 | -0.463173747 | 0.02061  | -0.518595772 | 0.010259 |
| TTC5        | -0.478362782 | 0.003719 | -0.18746061  | 0.25091  | -0.372867807 | 0.022409 |
| USP16       | -0.27668191  | 0.003721 | -0.005023222 | 0.95755  | 0.029004259  | 0.758078 |
| ZZEF1       | 0.475759096  | 0.003726 | 0.165229079  | 0.31391  | 0.166307793  | 0.311177 |
| CYB5R1      | -0.431364313 | 0.003739 | -0.370030822 | 0.01217  | -0.613961661 | 3.77E-05 |
| LYPD6B      | 0.649613188  | 0.003752 | 1.233667622  | 2.73E-08 | 0.883392932  | 7.26E-05 |
| DST         | 0.445629829  | 0.003761 | 0.396809219  | 0.00986  | 0.395915849  | 0.010033 |
| ECHDC2      | -0.453371451 | 0.003767 | -0.253190321 | 0.10243  | -0.249140444 | 0.108201 |
| LRRC8C      | 0.498730272  | 0.003772 | 0.135648809  | 0.4327   | 0.159733641  | 0.353807 |
| LLGL1       | 0.493983988  | 0.003782 | 0.207053905  | 0.22537  | 0.133663457  | 0.4339   |
| MT-CO2      | 0.705986186  | 0.003787 | 0.186262793  | 0.44495  | 0.145332062  | 0.55117  |
| COL5A1      | 0.739468012  | 0.00379  | 0.524016996  | 0.04019  | 0.074990423  | 0.769116 |

|            |              |          |              |          |              |          |
|------------|--------------|----------|--------------|----------|--------------|----------|
| TOR4A      | 0.473830115  | 0.003794 | 0.165317506  | 0.31371  | 0.101544902  | 0.536136 |
| RYK        | -0.270164385 | 0.003809 | -0.108652598 | 0.24214  | -0.105350997 | 0.256032 |
| TMEM158    | 1.303649089  | 0.003807 | 1.190525572  | 0.00817  | 0.601027598  | 0.185191 |
| HNRNPU     | 0.216130997  | 0.003814 | 0.009787582  | 0.89572  | 0.157431237  | 0.0349   |
| NOS1       | 0.920082069  | 0.003817 | 0.601457103  | 0.05993  | 0.209201368  | 0.519034 |
| PCDH11X    | 1.665826444  | 0.003815 | 1.649855896  | 0.00414  | 0.068940103  | 0.906152 |
| WARS2      | -0.359344238 | 0.003812 | -0.320637829 | 0.00877  | -0.192722118 | 0.115948 |
| ABHD4      | 0.555925856  | 0.003824 | 0.167120217  | 0.38579  | 0.032659268  | 0.865475 |
| ARSE       | -0.578037994 | 0.003824 | -0.359411406 | 0.07054  | -0.592075891 | 0.002935 |
| STK36      | 0.49402262   | 0.003824 | 0.230987619  | 0.17614  | 0.301844444  | 0.076272 |
| BAG1       | -0.34484645  | 0.003838 | -0.187020642 | 0.11306  | -0.195789555 | 0.096607 |
| GAL        | 1.700582273  | 0.003837 | 2.319184197  | 6.57E-05 | 0.691162217  | 0.249128 |
| -HNRNPA2B1 | 0.312390284  | 0.003838 | -0.090880444 | 0.40047  | 0.078192847  | 0.469203 |
| SMTN       | 0.634367452  | 0.003843 | -0.303950239 | 0.16725  | 0.204685427  | 0.351193 |
| COMMD9     | -0.318344    | 0.003845 | -0.061760053 | 0.56496  | -0.174919186 | 0.103934 |
| KIAA1324L  | -0.519906492 | 0.003848 | -0.311530051 | 0.08264  | -0.152013023 | 0.396123 |
| MRPL4      | 0.402143066  | 0.00385  | 0.019632637  | 0.88875  | 0.084429561  | 0.545305 |
| FAM193B    | 0.443993051  | 0.003857 | 0.056406102  | 0.71401  | 0.237757482  | 0.121396 |
| SMC3       | -0.307122506 | 0.003856 | -0.279463725 | 0.00838  | 0.153372858  | 0.146137 |
| IL7        | 1.276856335  | 0.003873 | 0.836117266  | 0.06056  | 0.795791274  | 0.074766 |
| MT-ND1     | 0.847708772  | 0.003872 | 0.374455761  | 0.20216  | 0.334177199  | 0.25502  |
| PRR14L     | 0.336077834  | 0.003872 | 0.158934562  | 0.17135  | 0.303386845  | 0.008968 |
| PCYOX1     | -0.290321407 | 0.003885 | -0.315698179 | 0.00166  | -0.296005601 | 0.003173 |
| CD55       | 0.877382927  | 0.003892 | 0.569755862  | 0.06094  | 0.852932975  | 0.004998 |
| WRNIP1     | -0.271667887 | 0.003904 | -0.18539774  | 0.04671  | -0.058619463 | 0.526995 |
| PKD1L1     | -1.34883529  | 0.003913 | -0.265931254 | 0.5677   | -1.091582998 | 0.0198   |
| LSM7       | -0.361443973 | 0.003927 | -0.170057171 | 0.16799  | -0.297711286 | 0.01602  |
| OTUD1      | 0.599888559  | 0.003927 | 0.913100972  | 9.66E-06 | 0.947221123  | 4.33E-06 |
| LTBR       | 0.437019395  | 0.00394  | 0.164555006  | 0.27688  | 0.27627118   | 0.067943 |
| MAP2K7     | 0.777405159  | 0.003946 | 0.311871039  | 0.24879  | -0.012670752 | 0.962659 |
| MAPK11     | 1.128934752  | 0.003951 | 1.076857884  | 0.00551  | 0.660291402  | 0.09159  |
| ZNRF1      | 0.440649681  | 0.003957 | 0.052813463  | 0.73161  | 0.261765418  | 0.086731 |
| HMGB3P9    | -1.787029927 | 0.003971 | -0.424494628 | 0.41587  | -0.735959768 | 0.166866 |
| ODC1       | -0.463731819 | 0.003983 | -0.408138693 | 0.01112  | -0.144522571 | 0.367738 |
| RPS6       | -0.377762181 | 0.003986 | -0.309347977 | 0.01837  | -0.297752277 | 0.023218 |
| BTF3L4     | -0.259284374 | 0.004003 | -0.132524378 | 0.13929  | -0.034139731 | 0.701668 |
| HOMEZ      | 0.453344588  | 0.004    | 0.185859557  | 0.23726  | 0.152484942  | 0.332129 |
| HSD17B11   | -0.614571447 | 0.004004 | -0.296630211 | 0.16318  | -0.458325737 | 0.031279 |
| KRT23      | 1.965706885  | 0.004008 | 1.42281766   | 0.03757  | 2.283181152  | 0.000821 |
| SHMT1      | -0.54874468  | 0.004016 | -0.429519757 | 0.02309  | -0.45237479  | 0.01656  |
| ABCC5      | -0.447152534 | 0.004037 | -0.367248386 | 0.01749  | -0.332555333 | 0.031317 |
| RAB34      | 0.364735942  | 0.004035 | 0.147249983  | 0.24525  | 0.319673897  | 0.011524 |
| TSN        | -0.250098043 | 0.004037 | -0.021604641 | 0.80157  | -0.03113681  | 0.717182 |
| ATL3       | -0.222768909 | 0.004048 | 0.076158418  | 0.32014  | -0.180371128 | 0.019153 |
| HMGN1      | -0.220543519 | 0.004048 | -0.020580147 | 0.78772  | 0.06051504   | 0.428115 |
| BLVRB      | -0.450048512 | 0.004066 | -0.343249151 | 0.02758  | -0.369931115 | 0.017666 |
| ANO1       | 0.861762021  | 0.004079 | 0.57666751   | 0.05463  | 0.297986232  | 0.320935 |

|            |              |          |              |         |              |          |
|------------|--------------|----------|--------------|---------|--------------|----------|
| GLI3       | 0.874450593  | 0.004078 | 0.466013685  | 0.12646 | 0.377836859  | 0.215495 |
| PPIL3      | -0.341359794 | 0.004086 | -0.229967724 | 0.05057 | -0.114122783 | 0.328687 |
| NDUFAF1    | -0.436446183 | 0.004094 | -0.029434444 | 0.83817 | 0.062190281  | 0.665965 |
| TIMELESS   | -0.482573267 | 0.004096 | -0.352344657 | 0.0353  | -0.287451215 | 0.085651 |
| TANC2      | 0.640866106  | 0.004099 | 0.536913768  | 0.01619 | 0.225048113  | 0.313844 |
| PDCD2L     | -0.655829613 | 0.004111 | -0.185304113 | 0.39383 | -0.182296161 | 0.400674 |
| GSS        | -0.289995932 | 0.004125 | -0.102448921 | 0.30406 | -0.301606536 | 0.002616 |
| HOXA3      | 1.082898345  | 0.004136 | -0.046558952 | 0.90438 | 0.039834483  | 0.91673  |
| SF3A1      | 0.398295536  | 0.004156 | -0.046893611 | 0.73593 | 0.168153925  | 0.225845 |
| ORC2       | -0.354618966 | 0.004164 | 0.096869406  | 0.42899 | 0.034065037  | 0.780915 |
| PTS        | 0.407401856  | 0.004164 | 0.534700178  | 0.00015 | 0.607287296  | 1.50E-05 |
| AC141586.5 | 0.559425467  | 0.004178 | -0.054223585 | 0.78443 | -0.0683747   | 0.729535 |
| ZC3H11A    | 0.193572957  | 0.004181 | 0.082427529  | 0.2222  | 0.07693523   | 0.254036 |
| MOB4       | -0.334879809 | 0.004187 | -0.130645868 | 0.26026 | -0.060615558 | 0.600806 |
| HDHD2      | -0.329623261 | 0.004199 | -0.219390919 | 0.0528  | -0.228609757 | 0.04318  |
| GMPS       | -0.283970188 | 0.004202 | -0.080838481 | 0.41352 | -0.064936599 | 0.510811 |
| TMEM5      | -0.360851353 | 0.004221 | -0.20482478  | 0.0967  | -0.145774503 | 0.23768  |
| MBTD1      | -0.297524129 | 0.004225 | -0.213289709 | 0.03807 | -0.153048999 | 0.134914 |
| C5         | -0.876860774 | 0.004234 | -0.252263515 | 0.40712 | -0.690277577 | 0.023583 |
| FAM131A    | 0.506437175  | 0.004237 | 0.289331736  | 0.10181 | 0.277746478  | 0.114848 |
| NFYB       | -0.354656337 | 0.004237 | -0.053514491 | 0.66353 | 0.212067462  | 0.083123 |
| SEC24D     | 0.457317343  | 0.004244 | 0.091605082  | 0.56661 | 0.171971652  | 0.282072 |
| C11orf31   | -0.390878122 | 0.004254 | -0.263385178 | 0.05143 | -0.513593989 | 0.00016  |
| NPEPL1     | -0.544652996 | 0.004256 | -0.520283418 | 0.00613 | -0.246061641 | 0.191286 |
| UGGT1      | -0.28462411  | 0.004262 | -0.044217071 | 0.6561  | -0.016526211 | 0.867866 |
| ZNF644     | -0.21048608  | 0.004261 | -0.065555412 | 0.37053 | 0.085734873  | 0.23987  |
| CHD8       | 0.293272036  | 0.004272 | 0.225776094  | 0.02756 | 0.372111822  | 0.000278 |
| MAP3K12    | 0.698488102  | 0.004279 | 0.201788802  | 0.4097  | 0.140953054  | 0.563875 |
| NFU1       | -0.338205093 | 0.00428  | -0.010894237 | 0.92527 | 0.003372021  | 0.976833 |
| TMEM144    | -0.50752785  | 0.004285 | -0.323166406 | 0.06723 | -0.611277353 | 0.000565 |
| LSM12      | 0.308085302  | 0.004289 | 0.065599196  | 0.54336 | 0.25099648   | 0.019504 |
| FXVD6      | 0.677986434  | 0.004301 | -0.382481574 | 0.11079 | 0.416491241  | 0.079646 |
| GTF2F2     | -0.313128619 | 0.0043   | -0.140789854 | 0.19137 | -0.082012233 | 0.443739 |
| LRRC55     | 1.887926132  | 0.004304 | 1.392314926  | 0.03604 | 2.318898424  | 0.000414 |
| RPL4       | -0.332708374 | 0.004303 | -0.191106286 | 0.10095 | -0.169867993 | 0.144829 |
| NEIL3      | -0.421758376 | 0.004327 | -0.250571578 | 0.08265 | 0.051146532  | 0.718517 |
| TMEM99     | -0.60267076  | 0.004327 | -0.233225962 | 0.24966 | -0.473240267 | 0.021073 |
| CABP4      | 1.511382095  | 0.004339 | 0.81505508   | 0.12583 | 1.119092561  | 0.03274  |
| MED29      | 1.004865632  | 0.004338 | 0.19190174   | 0.59357 | 0.345561184  | 0.329885 |
| OR7E38P    | 0.61234886   | 0.004338 | 0.45942065   | 0.03211 | 0.509555565  | 0.01673  |
| TENC1      | 0.65952312   | 0.004337 | 0.131851247  | 0.56879 | 0.233832295  | 0.312199 |
| AC012501.3 | -0.823417976 | 0.004351 | -0.653269515 | 0.0204  | -0.8638715   | 0.002402 |
| GNG10      | -0.428836239 | 0.004363 | -0.024775901 | 0.86808 | -0.040701952 | 0.784882 |
| RAB11B     | 0.548798554  | 0.004366 | 0.101615734  | 0.60063 | 0.169381284  | 0.383331 |
| COIL       | -0.253503946 | 0.004375 | -0.059999208 | 0.4917  | -0.070244693 | 0.41889  |
| RPL14P1    | -1.405369623 | 0.00438  | -0.546095241 | 0.22759 | -0.840168921 | 0.067599 |
| CLK1       | -0.46655642  | 0.004388 | -0.586727277 | 0.00034 | -0.355060773 | 0.029886 |

|           |              |          |              |         |              |          |
|-----------|--------------|----------|--------------|---------|--------------|----------|
| EEF1A1P5  | 0.406523299  | 0.004384 | 0.165826875  | 0.24516 | -0.049690972 | 0.727661 |
| TMEM251   | -0.606671828 | 0.004388 | -0.197904855 | 0.31595 | -0.355004951 | 0.075973 |
| JAZF1     | 0.561226028  | 0.004396 | 0.249840584  | 0.20444 | 0.631327704  | 0.00123  |
| RNF13     | -0.339658672 | 0.004406 | -0.025150008 | 0.83144 | -0.301413328 | 0.010954 |
| SLC43A1   | -0.644564612 | 0.004405 | -0.776123613 | 0.00059 | -0.676145254 | 0.002743 |
| TLE4      | 0.400756391  | 0.004415 | 0.039684029  | 0.77826 | 0.552586733  | 8.05E-05 |
| TM9SF3    | -0.250936318 | 0.004415 | 0.097552671  | 0.26769 | -0.079760926 | 0.364938 |
| IRF2      | 0.581059531  | 0.004422 | 0.091848737  | 0.65303 | 0.07519404   | 0.712721 |
| TAPT1     | 0.409761383  | 0.004423 | 0.311783825  | 0.02928 | 0.42049527   | 0.003196 |
| ZNF697    | 0.500352229  | 0.004432 | 0.515484238  | 0.00326 | 0.327517341  | 0.062181 |
| NEK4      | -0.287228053 | 0.004438 | 0.016793208  | 0.86667 | -0.217212761 | 0.029871 |
| SAP130    | 0.32718968   | 0.004455 | -0.07282223  | 0.52994 | 0.134308242  | 0.242668 |
| EMG1      | -0.383500508 | 0.0045   | -0.014504358 | 0.91367 | 0.024363133  | 0.855274 |
| UBR7      | -0.427147031 | 0.004508 | -0.270651205 | 0.06778 | -0.197230523 | 0.182211 |
| NME1-NME2 | -0.341635702 | 0.004512 | -0.068233943 | 0.56933 | -0.206642853 | 0.085012 |
| ZER1      | 0.318921256  | 0.004513 | 0.230551435  | 0.04032 | -0.072649487 | 0.519111 |
| FAM83H    | 17.59449634  | 0.004531 | -0.178510771 | 0.97721 | 15.96596831  | 0.010564 |
| POP7      | -0.348540436 | 0.004545 | -0.137358413 | 0.25145 | -0.246011352 | 0.040557 |
| TCF21     | 0.752919781  | 0.004549 | -0.246847804 | 0.35564 | 0.357509767  | 0.178342 |
| ZNF252P   | -0.343867663 | 0.00456  | -0.144632335 | 0.22843 | -0.253415009 | 0.034954 |
| KANK1     | -0.403053818 | 0.004562 | -0.172318458 | 0.22313 | -0.372501619 | 0.008559 |
| LOX       | 0.934089914  | 0.004568 | 0.944331234  | 0.00411 | 0.363774162  | 0.2698   |
| UBQLN2    | 0.31200718   | 0.004582 | -0.047724936 | 0.66668 | 0.058243198  | 0.596868 |
| KIAA0556  | 0.546132533  | 0.004589 | 0.346388114  | 0.07185 | 0.328853541  | 0.08725  |
| SNAI1     | 0.626202232  | 0.004589 | -0.176944601 | 0.4356  | 0.312727277  | 0.158052 |
| BBS2      | -0.434893548 | 0.004594 | -0.027844726 | 0.85448 | -0.479661939 | 0.001655 |
| GPAA1     | 0.488155394  | 0.004604 | 0.273572331  | 0.11108 | -0.108142845 | 0.530387 |
| PXN       | 0.572147169  | 0.004611 | 0.066482186  | 0.74243 | 0.073267158  | 0.71702  |
| TAF1D     | -0.313519933 | 0.00461  | 0.067978225  | 0.53749 | -0.024701417 | 0.82264  |
| ZNF287    | -0.759271112 | 0.004609 | -0.235046761 | 0.37898 | -0.436540187 | 0.100883 |
| ARID5A    | 0.678433981  | 0.004616 | 0.393853457  | 0.10142 | 0.194483883  | 0.420636 |
| POLR1E    | -0.377169776 | 0.004618 | -0.400657828 | 0.00246 | -0.356900799 | 0.006725 |
| CCDC115   | -0.405315981 | 0.004628 | -0.439428884 | 0.00197 | -0.488939048 | 0.000564 |
| SLC5A5    | 1.010820847  | 0.004648 | 0.8495137    | 0.01728 | 0.613176613  | 0.088867 |
| UBE2K     | 0.329825505  | 0.00465  | 0.318929724  | 0.00606 | 0.279785484  | 0.015935 |
| PFN1      | 0.424571606  | 0.004666 | 0.236444317  | 0.11511 | 0.481971248  | 0.001314 |
| PHC1      | 0.679880761  | 0.004665 | 0.060564636  | 0.80141 | 0.593897346  | 0.013353 |
| SNF8      | -0.276977079 | 0.004664 | 0.047875098  | 0.61848 | -0.06781412  | 0.480404 |
| SH3YL1    | -0.365863256 | 0.004694 | -0.275189345 | 0.03309 | -0.378897032 | 0.00337  |
| DYRK4     | -0.37557897  | 0.004698 | -0.089490304 | 0.48987 | -0.081920914 | 0.524608 |
| ALOX15B   | 1.505008991  | 0.004721 | 0.343301397  | 0.53882 | -0.105968196 | 0.853448 |
| FXR2      | 0.330137703  | 0.004735 | 0.072009842  | 0.53648 | 0.347654138  | 0.002773 |
| MCMBP     | -0.234495112 | 0.004755 | -0.068509336 | 0.40581 | -0.027613876 | 0.736925 |
| MRPS16    | -0.352296689 | 0.004754 | -0.178012248 | 0.15176 | -0.268154599 | 0.030989 |
| NR1H2     | 0.433328572  | 0.004754 | 0.241531072  | 0.11349 | -0.145479044 | 0.345906 |
| HSPA4     | -0.275329722 | 0.004764 | -0.010669591 | 0.9126  | 0.040871546  | 0.673607 |
| UBE2Z     | 0.231247818  | 0.004764 | 0.111756658  | 0.17087 | 0.076490781  | 0.348548 |

|             |              |          |              |          |              |          |
|-------------|--------------|----------|--------------|----------|--------------|----------|
| TD-3148110. | 1.735252728  | 0.004771 | 1.421507449  | 0.02146  | 1.39424941   | 0.023914 |
| AIFM1       | -0.383520754 | 0.004782 | -0.23447934  | 0.08207  | 0.039406455  | 0.769144 |
| SNX5        | -0.296429592 | 0.004787 | -0.186674602 | 0.07456  | -0.22718661  | 0.029875 |
| CA5A        | 0.717149799  | 0.00479  | 0.502232124  | 0.04769  | 0.29562773   | 0.245145 |
| REL         | 0.480962651  | 0.004796 | 0.218586197  | 0.20006  | 0.424101347  | 0.012814 |
| LGALS9C     | 1.614037936  | 0.004799 | 1.188724785  | 0.03851  | 0.534822403  | 0.357511 |
| GAS7        | 0.610314923  | 0.004826 | 0.258910707  | 0.23327  | 0.579184968  | 0.007466 |
| PARK7       | -0.308971345 | 0.004825 | 0.013506661  | 0.90108  | -0.035174377 | 0.746164 |
| PVRL2       | 0.333718527  | 0.004827 | 0.111943186  | 0.3446   | 0.231667731  | 0.050138 |
| ZNF263      | -0.283293796 | 0.004825 | -0.183225973 | 0.06497  | -0.225911677 | 0.022642 |
| SLC38A2     | 0.362337271  | 0.004836 | 0.124008315  | 0.33481  | 0.406851337  | 0.001545 |
| THUMPD1     | -0.259795298 | 0.004836 | -0.092959678 | 0.30949  | -0.021742274 | 0.81169  |
| SEMA6B      | 1.109949058  | 0.004844 | 0.983093186  | 0.01233  | -0.227223069 | 0.569858 |
| LINC00493   | -0.304050889 | 0.004864 | -0.29693765  | 0.00536  | -0.232439143 | 0.02825  |
| ZNF71       | 0.585698875  | 0.004865 | 0.202024413  | 0.33029  | 0.540883234  | 0.009039 |
| RANBP6      | -0.302467414 | 0.004875 | -0.146447902 | 0.16882  | -0.044585538 | 0.674154 |
| CCDC97      | 0.498378358  | 0.00488  | 0.249415119  | 0.16166  | -0.062888807 | 0.726329 |
| KIAA1009    | -0.469833653 | 0.004883 | -0.161784902 | 0.327    | -0.0500933   | 0.760222 |
| NDOR1       | 0.41211753   | 0.004884 | 0.29603966   | 0.04215  | 0.179232863  | 0.221419 |
| UBE2T       | -0.432158836 | 0.00489  | -0.253747974 | 0.09091  | -0.177592704 | 0.233118 |
| ARMC10      | -0.267777774 | 0.004904 | -0.238892274 | 0.01177  | -0.240482642 | 0.010858 |
| LUZP1       | 0.38774277   | 0.004903 | 0.194956393  | 0.15728  | 0.251043926  | 0.067965 |
| TTC30B      | -0.463633928 | 0.004931 | -0.179946985 | 0.26522  | -0.353450231 | 0.029405 |
| HS3ST5      | -1.252779672 | 0.00494  | 0.216688288  | 0.60026  | 0.30787028   | 0.462045 |
| FOXJ2       | 0.486456143  | 0.004951 | -0.133803247 | 0.44418  | -0.059115851 | 0.734923 |
| DTNB        | -0.585267774 | 0.004955 | -0.366152616 | 0.07452  | -0.688992998 | 0.000882 |
| SMPD1       | 0.536491144  | 0.004958 | 0.436285057  | 0.02245  | 0.231166137  | 0.22646  |
| DEDD        | 0.305712888  | 0.004972 | 0.143821109  | 0.18474  | 0.392565478  | 0.00027  |
| TPST2       | 0.510428854  | 0.004972 | 0.413808105  | 0.02243  | 0.580974115  | 0.001291 |
| STRBP       | -0.349369831 | 0.004978 | -0.185237566 | 0.13363  | -0.111597706 | 0.364995 |
| GTF2H5      | -0.30228758  | 0.004985 | -0.18334725  | 0.08285  | -0.178148895 | 0.090796 |
| RBM12B      | -0.535097918 | 0.004988 | -0.245854101 | 0.19597  | -0.208223301 | 0.272538 |
| SDHA        | -0.24736735  | 0.004991 | -0.177312666 | 0.04349  | -0.158454368 | 0.070591 |
| SELE        | 3.49860886   | 0.004982 | 2.264139165  | 0.0722   | 3.127814665  | 0.012063 |
| TYSND1      | -0.529207217 | 0.004989 | -0.186708979 | 0.31285  | -0.508950096 | 0.006391 |
| ZBTB43      | 0.372962919  | 0.005002 | 0.120850255  | 0.36227  | 0.128000655  | 0.332579 |
| SIM1        | -1.219611019 | 0.005027 | -0.068626443 | 0.87287  | -1.648776669 | 0.000145 |
| DIAPH2      | 0.388742449  | 0.00503  | 0.554095655  | 6.24E-05 | 0.67134298   | 1.22E-06 |
| FKBP9L      | -1.260823611 | 0.005039 | -1.23672266  | 0.0059   | -2.539646255 | 2.00E-08 |
| MEA1        | -0.270753508 | 0.005048 | -0.077108115 | 0.41854  | -0.039207313 | 0.68001  |
| RP1-152L7.5 | -0.671857657 | 0.005057 | -0.530263146 | 0.02577  | -0.555705778 | 0.019343 |
| BATF3       | 1.884203058  | 0.005063 | 2.001092777  | 0.00271  | 2.272671347  | 0.000522 |
| YKT6        | 0.189818361  | 0.00511  | 0.271836471  | 5.23E-05 | 0.233491036  | 0.000513 |
| ST3GAL1     | 0.605917684  | 0.005115 | 0.301887211  | 0.16373  | 0.299007518  | 0.167184 |
| GTPBP1      | 0.426501004  | 0.005122 | -0.07862069  | 0.60653  | 0.205509551  | 0.177367 |
| HDAC1       | -0.213262106 | 0.005134 | -0.251228742 | 0.00094  | -0.186872713 | 0.013688 |
| AC004797.1  | -0.552250106 | 0.005148 | 0.189943716  | 0.32737  | 0.148922727  | 0.442484 |

|          |              |          |              |         |              |          |
|----------|--------------|----------|--------------|---------|--------------|----------|
| PPP2R1A  | 0.239498952  | 0.005146 | 0.105760953  | 0.21661 | 0.000713764  | 0.993344 |
| TXNDC12  | -0.340891035 | 0.005145 | -0.210018805 | 0.08386 | -0.239878553 | 0.048011 |
| YES1     | -0.253965516 | 0.005145 | 0.102969853  | 0.25439 | -0.098291913 | 0.27714  |
| PIWIL1   | -2.024337666 | 0.005187 | -1.651116488 | 0.01843 | -0.670769441 | 0.323237 |
| C2orf69  | -0.275044847 | 0.005194 | -0.022278903 | 0.81601 | -0.179595204 | 0.062176 |
| ARL8A    | 0.621773911  | 0.005211 | 0.158045443  | 0.47875 | 0.484091486  | 0.029346 |
| FRMD8    | 0.601931374  | 0.005212 | 0.516551686  | 0.01627 | 0.171843455  | 0.425915 |
| ATAD5    | -0.439310399 | 0.00525  | -0.313532874 | 0.04488 | -0.234178821 | 0.133166 |
| ZDHHC23  | -0.525906153 | 0.005249 | -0.33548618  | 0.07039 | -0.308934622 | 0.097293 |
| SMUG1    | -0.294951715 | 0.005253 | -0.190595006 | 0.06754 | -0.223602815 | 0.031792 |
| LPIN1    | 0.40912426   | 0.005271 | 0.18145846   | 0.21539 | 0.401746045  | 0.006049 |
| AHCY     | -0.358918651 | 0.005274 | -0.37487757  | 0.00354 | -0.191832726 | 0.135084 |
| F13A1    | 2.137788135  | 0.005289 | 0.66092855   | 0.39861 | 0.260869063  | 0.739863 |
| DGKA     | 0.676466604  | 0.00532  | 0.180550871  | 0.45771 | 0.277555592  | 0.253874 |
| LIAS     | -0.460639769 | 0.00533  | -0.244749394 | 0.13165 | -0.552911053 | 0.000678 |
| ATP7A    | -0.318684482 | 0.005344 | -0.104545965 | 0.35777 | -0.304121814 | 0.007575 |
| VWA5A    | -0.436570897 | 0.005352 | -0.280574524 | 0.07115 | -0.677843773 | 1.57E-05 |
| CCDC15   | -0.436367714 | 0.005369 | -0.167153209 | 0.26338 | -0.256837339 | 0.085186 |
| MORN2    | -0.483792902 | 0.005368 | -0.013518836 | 0.93503 | -0.168757085 | 0.31013  |
| TBC1D9   | -0.411555847 | 0.005368 | -0.054631275 | 0.71012 | -0.332380516 | 0.024036 |
| CSPG4    | 0.764668255  | 0.005378 | 0.353592813  | 0.19893 | -0.060805018 | 0.825844 |
| FAM169A  | -0.471661612 | 0.005403 | -0.331024133 | 0.04999 | -0.030299714 | 0.857052 |
| HECTD3   | 0.401324157  | 0.0054   | 0.202960264  | 0.15934 | 0.16966484   | 0.240007 |
| NCAPG2   | -0.48055375  | 0.005401 | -0.103376246 | 0.54624 | -0.180356556 | 0.292434 |
| SLC16A2  | 0.7930792    | 0.005394 | 0.424721752  | 0.13674 | 0.424615305  | 0.136803 |
| SPTSSA   | 0.327287685  | 0.005398 | 0.40834979   | 0.00048 | 0.607074468  | 1.80E-07 |
| PPFIA4   | 0.608356089  | 0.005412 | 0.198252632  | 0.36537 | 0.156821302  | 0.473815 |
| PTGER4   | 1.104729277  | 0.005411 | 0.421141307  | 0.28886 | 1.25241342   | 0.001507 |
| CAPN2    | 0.411346551  | 0.005422 | 0.306975734  | 0.03785 | 0.099577641  | 0.50083  |
| RINL     | -0.593154164 | 0.00542  | -0.169620449 | 0.41527 | -0.545282896 | 0.010104 |
| CCNE2    | -0.702366312 | 0.00544  | -0.053778714 | 0.82826 | 0.032916633  | 0.894164 |
| CCNT1    | 0.212334199  | 0.005439 | 0.074294991  | 0.32789 | 0.261683015  | 0.000519 |
| COL6A6   | 1.461785699  | 0.005439 | 0.586797336  | 0.26572 | 0.87063864   | 0.098324 |
| BOLA3    | -0.459086939 | 0.005454 | -0.136903061 | 0.39378 | -0.246475967 | 0.126097 |
| MYOCD    | 1.05025852   | 0.005454 | -0.682471312 | 0.07305 | 0.659277335  | 0.081045 |
| C10orf10 | 0.745524095  | 0.005465 | 0.454347123  | 0.09088 | 0.741437752  | 0.005601 |
| EPHA1    | -0.460628065 | 0.005474 | -0.171306324 | 0.29697 | -0.461004441 | 0.005316 |
| HNMT     | -0.267743812 | 0.005473 | -0.065387838 | 0.49285 | -0.123495642 | 0.194919 |
| RPA2     | -0.411401907 | 0.005492 | -0.149158972 | 0.30823 | -0.182701497 | 0.21197  |
| ATP6V0E2 | -0.588110888 | 0.005503 | -0.356282979 | 0.08373 | -0.476546934 | 0.020923 |
| FAM160A2 | 0.455326565  | 0.005518 | 0.160886288  | 0.32688 | 0.16118838   | 0.325184 |
| LGALS8   | 0.432743865  | 0.00552  | 0.526191721  | 0.00073 | 0.487091815  | 0.001753 |
| ART3     | -1.137498376 | 0.005527 | -0.956591019 | 0.01641 | -0.568890195 | 0.144421 |
| FAM168B  | 0.335014985  | 0.005531 | 0.040310696  | 0.73819 | 0.282148289  | 0.019182 |
| PM20D2   | -0.356045988 | 0.00553  | -0.339094456 | 0.00799 | -0.177728969 | 0.163022 |
| TMEM256  | -0.35574886  | 0.005534 | -0.078826211 | 0.5316  | -0.239227153 | 0.058698 |
| AFMID    | -0.370937329 | 0.005541 | -0.28391167  | 0.03261 | -0.376678913 | 0.004605 |

|            |              |          |              |         |              |          |
|------------|--------------|----------|--------------|---------|--------------|----------|
| DUSP19     | -0.551052816 | 0.005546 | -0.378849335 | 0.0524  | -0.496786706 | 0.011986 |
| PRDX1      | -0.363861063 | 0.005543 | -0.06482951  | 0.62053 | 0.0094005    | 0.942753 |
| SMC4       | -0.409322427 | 0.005546 | -0.21002622  | 0.15418 | -0.11300528  | 0.442987 |
| TMEM159    | -0.446767713 | 0.005547 | -0.118180534 | 0.45604 | -0.52721026  | 0.001003 |
| NCOA1      | 0.304266401  | 0.005563 | 0.223333213  | 0.04179 | 0.274831199  | 0.012115 |
| P11-598P20 | 0.52193575   | 0.005569 | -0.067908174 | 0.72639 | 0.309279281  | 0.099946 |
| ELOVL2     | 1.25332587   | 0.005571 | 0.958952572  | 0.0344  | 1.658388221  | 0.000205 |
| AP1G1      | 0.200383118  | 0.005578 | 0.048575362  | 0.49991 | 0.219284459  | 0.00228  |
| ZC3H8      | -1.000964317 | 0.005583 | -0.328597423 | 0.3606  | -0.707472996 | 0.049518 |
| SLC16A13   | 0.525905336  | 0.005606 | 0.222080148  | 0.24733 | 0.345437041  | 0.067296 |
| RNF183     | 0.662840455  | 0.005609 | 0.764198272  | 0.00138 | 0.434164874  | 0.069817 |
| ARID3A     | 0.581052113  | 0.00563  | 0.239870479  | 0.25297 | 0.268970327  | 0.199911 |
| SAMD13     | -0.623864705 | 0.005638 | 0.141286506  | 0.51744 | -0.382064611 | 0.083265 |
| MYO15A     | 0.728645568  | 0.005653 | 0.789467745  | 0.0028  | 0.597226775  | 0.02338  |
| DES        | 0.905954021  | 0.005659 | 0.290963158  | 0.37585 | 0.94001282   | 0.004027 |
| NAA20      | -0.283194499 | 0.005659 | 0.048492771  | 0.62595 | -0.091225387 | 0.361788 |
| ADSS       | -0.339618869 | 0.005669 | -0.107690925 | 0.37787 | -0.329352501 | 0.007039 |
| DCLK2      | 0.816250087  | 0.005667 | 0.166918561  | 0.5764  | 0.852474538  | 0.003706 |
| RPL8       | -0.363941388 | 0.00567  | -0.263280951 | 0.04528 | -0.402300226 | 0.002223 |
| XPNPEP2    | 1.874601085  | 0.005666 | 0.821984891  | 0.23047 | -0.244246704 | 0.726913 |
| FTL        | -0.313142111 | 0.005683 | -0.26159584  | 0.02081 | -0.410535229 | 0.000287 |
| FGF23      | 0.781360673  | 0.0057   | 0.599504816  | 0.0339  | -0.468300335 | 0.110592 |
| ITIH2      | -0.719663379 | 0.005702 | 0.007737707  | 0.97627 | -0.442811128 | 0.088817 |
| PTPRJ      | 0.612820001  | 0.005732 | 0.784923308  | 0.00038 | 0.704619113  | 0.0014   |
| TBC1D20    | 0.204314843  | 0.005737 | -0.015201991 | 0.83725 | 0.067425488  | 0.358715 |
| CSRP1      | 0.491728415  | 0.005745 | 0.156838979  | 0.37852 | 0.340254222  | 0.055914 |
| FGF2       | 0.981086077  | 0.00575  | 0.690271236  | 0.05204 | 0.622896519  | 0.079612 |
| SRSF1      | -0.322665512 | 0.00575  | -0.123475464 | 0.29023 | 0.035001308  | 0.764212 |
| HS3ST1     | 0.707874297  | 0.005753 | 0.7078137    | 0.00551 | 0.47867727   | 0.060988 |
| IRAK1      | -0.522203085 | 0.005773 | -0.299727125 | 0.11156 | -0.629855609 | 0.000845 |
| LAMA1      | -0.860416145 | 0.005774 | -0.471830942 | 0.12949 | -0.223623201 | 0.471973 |
| NEK3       | -2.507106349 | 0.005775 | -0.934472288 | 0.2757  | -0.943036983 | 0.269296 |
| YBX3       | 0.392345713  | 0.00578  | 0.505299585  | 0.00037 | 0.425772229  | 0.002697 |
| LAPTM4B    | 1.003852317  | 0.005784 | 0.574817181  | 0.1147  | 0.853264872  | 0.018967 |
| TYK2       | 0.310655396  | 0.005798 | 0.220176994  | 0.04991 | 0.14009965   | 0.212517 |
| IDS        | 0.410583066  | 0.005805 | 0.381872098  | 0.01029 | 0.100452307  | 0.500513 |
| DUSP5      | 0.902952457  | 0.005822 | 0.046224712  | 0.88789 | 1.598227011  | 1.01E-06 |
| ZNF90      | -0.50774206  | 0.005831 | -0.379255747 | 0.0361  | -0.223240592 | 0.213526 |
| ZMYM4      | 0.32729417   | 0.005841 | 0.298552125  | 0.0118  | 0.43810183   | 0.000217 |
| HS3ST3A1   | 1.822374954  | 0.005851 | 0.301515356  | 0.65376 | 0.052350468  | 0.938104 |
| CCDC104    | -0.369918616 | 0.005864 | -0.100610829 | 0.4478  | -0.023510095 | 0.858915 |
| PTCH2      | -0.847720314 | 0.005863 | 0.908447661  | 0.00293 | -0.012075622 | 0.968534 |
| YIPF4      | -0.381949773 | 0.005865 | -0.010601919 | 0.93879 | -0.173464937 | 0.209201 |
| CCT4       | -0.284039408 | 0.005872 | 0.008645365  | 0.93297 | 0.002787756  | 0.978355 |
| SLC25A15   | -0.391751775 | 0.00587  | -0.292547674 | 0.03602 | -0.367088414 | 0.008338 |
| NOP56      | -0.349995742 | 0.005878 | -0.168798626 | 0.18247 | -0.053702426 | 0.671172 |
| SMARCAD1   | -0.214828033 | 0.00588  | -0.119453686 | 0.12292 | 0.07854225   | 0.307582 |



|           |              |          |              |         |              |          |
|-----------|--------------|----------|--------------|---------|--------------|----------|
| MT-ND2    | 0.825895919  | 0.005884 | 0.568723229  | 0.05791 | 0.462255761  | 0.123257 |
| CABLES2   | 0.386171201  | 0.005901 | 0.071017589  | 0.61465 | 0.119685287  | 0.392487 |
| TOMM20    | -0.281328432 | 0.005925 | -0.209126618 | 0.04048 | -0.125130681 | 0.219993 |
| MASTL     | -0.367664215 | 0.005928 | -0.196899141 | 0.13753 | -0.191579897 | 0.14802  |
| B4GALNT4  | 0.571909107  | 0.00594  | 0.211508491  | 0.30951 | 0.547133094  | 0.008421 |
| POLE4     | -0.506403462 | 0.005945 | -0.336562449 | 0.06075 | -0.338756854 | 0.058131 |
| PPP1R13L  | 0.651637792  | 0.005941 | 0.221747417  | 0.35068 | 0.304896297  | 0.202013 |
| TFCP2L1   | -0.911210207 | 0.005943 | -0.614618518 | 0.06271 | -1.507668123 | 5.64E-06 |
| TACR3     | -1.040475281 | 0.005954 | -0.645843687 | 0.08691 | 0.009779223  | 0.979275 |
| LZTS3     | 0.444103253  | 0.005964 | 0.173711637  | 0.28353 | 0.4314459    | 0.007249 |
| HEYL      | 1.062744656  | 0.005986 | 0.827895886  | 0.0324  | 0.175814622  | 0.653766 |
| HOXB9     | 2.118206863  | 0.00599  | 0.25578474   | 0.74395 | 0.916155004  | 0.237828 |
| MARK4     | 0.540373125  | 0.005989 | 0.177405246  | 0.36962 | 0.142889001  | 0.468789 |
| TMEM258   | -0.35648995  | 0.005988 | -0.125327128 | 0.3301  | -0.254753321 | 0.047805 |
| CBWD1     | -0.507349497 | 0.006008 | -0.060863996 | 0.74056 | 0.161865436  | 0.377681 |
| GUCY1B3   | 0.497034165  | 0.00603  | 0.233369139  | 0.19752 | 0.721917099  | 6.13E-05 |
| KIAA0355  | 0.39735458   | 0.006048 | 0.134320571  | 0.35257 | 0.328284765  | 0.022671 |
| TMEM219   | -0.312068974 | 0.006052 | -0.16166033  | 0.15015 | -0.236852686 | 0.035324 |
| TMEM52    | -1.201040978 | 0.00606  | -1.251187364 | 0.00468 | -1.177552484 | 0.005859 |
| CCL11     | 1.739128006  | 0.006072 | 1.165922486  | 0.06888 | 0.818469565  | 0.206239 |
| GPR176    | 0.895580004  | 0.006089 | 0.83275212   | 0.01048 | 0.894831461  | 0.005974 |
| RANBP1    | -0.327248901 | 0.006106 | -0.119705445 | 0.31351 | 0.006065372  | 0.9592   |
| RPAIN     | -0.25293634  | 0.006113 | -0.306515294 | 0.00085 | -0.090236327 | 0.320191 |
| TMEM11    | 0.373323874  | 0.006115 | 0.068090216  | 0.61814 | 0.234350652  | 0.082562 |
| CTSZ      | -0.471549182 | 0.006126 | -0.313488309 | 0.06741 | -0.491060098 | 0.004215 |
| BCL2L14   | -0.554340061 | 0.006148 | -0.227746557 | 0.25275 | -0.240386476 | 0.227615 |
| COTL1     | 0.553633145  | 0.006141 | 0.429103402  | 0.03364 | 0.366525741  | 0.069598 |
| PRKX      | -0.432755464 | 0.00615  | -0.52563707  | 0.00086 | -0.354735124 | 0.024424 |
| SIRPA     | 0.62767761   | 0.006147 | 0.17247871   | 0.45439 | 0.563825673  | 0.013508 |
| SPAG16    | -0.357774614 | 0.006142 | -0.100049012 | 0.4365  | -0.086268058 | 0.500152 |
| PHF3      | -0.247364969 | 0.006164 | -0.165634981 | 0.06618 | -0.122163204 | 0.174809 |
| EEF1A1P13 | -0.681541882 | 0.006171 | -0.02333975  | 0.92275 | -0.308196399 | 0.203767 |
| LENG8     | 1.100199543  | 0.006174 | 1.000851639  | 0.01236 | 0.680347714  | 0.092511 |
| VNN2      | 1.175507904  | 0.006185 | 1.435352581  | 0.00069 | 1.274668457  | 0.002741 |
| NUP43     | -0.292247363 | 0.006197 | -0.100369437 | 0.34285 | -0.119429127 | 0.258697 |
| AGFG1     | 0.330999117  | 0.006202 | 0.176411854  | 0.14426 | 0.343843961  | 0.004388 |
| ZNRF3     | -0.463185702 | 0.006205 | -0.386856319 | 0.02113 | -0.492266603 | 0.003364 |
| CCDC141   | -1.34095871  | 0.006241 | -1.102504968 | 0.02365 | 0.017929151  | 0.970258 |
| GPM6B     | 0.634466754  | 0.00624  | 0.267490768  | 0.24919 | 0.426755797  | 0.064182 |
| SH2D3C    | 1.947522956  | 0.006242 | 1.69600755   | 0.01447 | 1.344793044  | 0.057353 |
| RSL1D1    | -0.356486521 | 0.006248 | -0.228172341 | 0.07967 | -0.183829616 | 0.15774  |
| SLC29A1   | -0.538556051 | 0.006246 | -0.452229939 | 0.02131 | -0.706624213 | 0.00033  |
| DACT3     | 0.569948112  | 0.006253 | -0.148669119 | 0.47889 | 0.325737468  | 0.118234 |
| SLC9C2    | -1.631359034 | 0.006262 | -1.252010225 | 0.03445 | -2.650497311 | 1.40E-05 |
| C1orf74   | -0.479602833 | 0.006272 | -0.113315364 | 0.50482 | -0.51775741  | 0.0028   |
| ZNF730    | -0.411475762 | 0.006273 | -0.153745788 | 0.29559 | 0.036605606  | 0.800683 |
| CYR61     | 0.851089069  | 0.006376 | 0.753039765  | 0.01572 | 0.944591424  | 0.002353 |

|            |              |          |              |          |              |          |
|------------|--------------|----------|--------------|----------|--------------|----------|
| .RRC37A15F | -1.144276502 | 0.006384 | -0.63823057  | 0.10412  | -0.446869907 | 0.245926 |
| PRL        | 3.353057574  | 0.006417 | 2.45945356   | 0.04594  | 3.416745331  | 0.005455 |
| GLMN       | -0.506726102 | 0.006435 | -0.04205985  | 0.81747  | -0.233050845 | 0.202016 |
| COL23A1    | 0.936822097  | 0.006443 | 0.221457214  | 0.53323  | 0.131777784  | 0.70919  |
| LMNB1      | -0.448356702 | 0.006438 | -0.304116318 | 0.06409  | -0.227934975 | 0.164844 |
| TMEM132A   | 0.605941741  | 0.006443 | 0.168305888  | 0.4498   | 0.218505998  | 0.326156 |
| CHRNA7     | 1.571359047  | 0.00645  | 0.362140878  | 0.53462  | 0.85378733   | 0.138799 |
| PNPLA2     | 0.710571549  | 0.006451 | 0.372344429  | 0.15737  | 0.376604098  | 0.150457 |
| SOWAHA     | -0.755096553 | 0.00647  | -0.419186542 | 0.12255  | -0.732697029 | 0.007524 |
| DCUN1D3    | 0.38888402   | 0.006486 | 0.426749597  | 0.00271  | 0.541828542  | 0.000133 |
| ECE1       | 0.655377787  | 0.006491 | 0.716942941  | 0.00289  | 0.086519808  | 0.71955  |
| STAG3L4    | 0.457135621  | 0.00649  | -0.078767736 | 0.63711  | 0.256054055  | 0.117028 |
| ZNF700     | -0.446368998 | 0.006501 | -0.245775386 | 0.12962  | -0.243889703 | 0.132105 |
| ENTPD5     | -0.412733577 | 0.006523 | -0.329259248 | 0.02979  | -0.624512962 | 3.85E-05 |
| FANCC      | -0.549977399 | 0.006524 | -0.510936458 | 0.01095  | -0.466051615 | 0.020011 |
| RNF186     | 1.817753425  | 0.00653  | 1.339777871  | 0.04519  | 0.218028157  | 0.745833 |
| HEATR1     | -0.347207486 | 0.006537 | -0.331745061 | 0.0092   | -0.050031646 | 0.694339 |
| ITGB6      | 0.772361151  | 0.00654  | 1.610232298  | 1.36E-08 | 0.781436304  | 0.005907 |
| FKBP15     | 0.303297362  | 0.006547 | 0.025381309  | 0.81955  | 0.0362865    | 0.74393  |
| KIAA0100   | 0.287858262  | 0.006563 | 0.22977884   | 0.02984  | 0.175515611  | 0.097085 |
| MRPL52     | -0.369266004 | 0.006576 | -0.080796805 | 0.54664  | -0.385908872 | 0.004163 |
| NT5DC1     | -0.538154662 | 0.006575 | -0.076049047 | 0.69945  | -0.215572642 | 0.27398  |
| ARID2      | 0.261557058  | 0.006583 | 0.101558039  | 0.29147  | 0.287373427  | 0.002728 |
| PET117     | -0.563558762 | 0.006594 | -0.345766955 | 0.08805  | -0.526722154 | 0.009843 |
| PRPS1      | -0.380754312 | 0.006604 | -0.344565768 | 0.01363  | -0.358187452 | 0.010296 |
| PLEKHM2    | 0.36916583   | 0.006607 | 0.152998528  | 0.26032  | 0.257980813  | 0.057047 |
| GUSBP1     | -0.484274469 | 0.006626 | -0.308102077 | 0.08022  | -0.261654999 | 0.136034 |
| LIMK2      | -0.312828959 | 0.006638 | -0.111679555 | 0.32909  | -0.28784907  | 0.012105 |
| NDUFB9     | -0.276275787 | 0.006642 | 0.000954376  | 0.99242  | -0.156843802 | 0.119123 |
| ZNF609     | 0.278218312  | 0.006644 | 0.026079849  | 0.7993   | 0.085098327  | 0.405717 |
| FGF5       | 0.668646689  | 0.006652 | 0.603396116  | 0.01409  | 0.5292624    | 0.031378 |
| SERPINI1   | -1.016892745 | 0.006654 | -0.377536484 | 0.29669  | -0.469022946 | 0.204706 |
| SUN2       | 0.403897784  | 0.006654 | 0.125677613  | 0.39737  | 0.174551279  | 0.239829 |
| FAM127B    | 0.421246288  | 0.006694 | -0.224737404 | 0.15916  | -0.077048176 | 0.624499 |
| HIST1H2AI  | -0.570983089 | 0.0067   | -0.305284868 | 0.1464   | -0.332349773 | 0.113823 |
| ELK3       | 0.521280304  | 0.00671  | 0.428439035  | 0.0256   | 0.189876327  | 0.324062 |
| ZDHHC2     | -0.633041881 | 0.006721 | -0.027637787 | 0.90552  | -0.153046085 | 0.51142  |
| LSM5       | -0.359307817 | 0.006731 | -0.129305167 | 0.32619  | -0.179515239 | 0.172044 |
| IRF1       | 0.5400727    | 0.006742 | 0.300356601  | 0.13216  | 0.46629561   | 0.018967 |
| MAP9       | -0.344601179 | 0.006746 | -0.28382044  | 0.02455  | -0.173986862 | 0.167969 |
| MNAT1      | -0.312124143 | 0.006746 | -0.103158362 | 0.36207  | -0.09081032  | 0.421031 |
| SYVN1      | 0.52718516   | 0.006747 | 0.288524346  | 0.1394   | 0.152722238  | 0.433845 |
| UACA       | -0.40015586  | 0.006748 | -0.094090807 | 0.52264  | -0.389686215 | 0.008225 |
| LRR31      | -0.91937486  | 0.006769 | -0.526544814 | 0.11142  | -1.328025835 | 9.37E-05 |
| F816-ZNF32 | -0.582405337 | 0.006775 | -0.236769213 | 0.2624   | 0.038654013  | 0.854228 |
| TD-3088G3. | 1.114316036  | 0.006782 | 0.697295265  | 0.09228  | 0.570147786  | 0.168431 |
| GIPC2      | -0.809885594 | 0.006782 | -0.478075215 | 0.10618  | -0.766329588 | 0.010167 |

|             |              |          |              |          |              |          |
|-------------|--------------|----------|--------------|----------|--------------|----------|
| C19orf57    | -0.91631917  | 0.006801 | -0.468801938 | 0.15536  | -0.61147469  | 0.064099 |
| THSD7B      | 1.881429721  | 0.006808 | 0.870658238  | 0.21318  | 1.98620511   | 0.004016 |
| AC024592.12 | 3.442894069  | 0.006822 | -0.70385989  | 0.58426  | 3.536463484  | 0.005468 |
| ANXA2       | 0.294905352  | 0.00682  | 0.43756184   | 5.93E-05 | 0.324949554  | 0.002864 |
| SRSF5       | -0.304285335 | 0.006824 | -0.070574731 | 0.5297   | 0.092577296  | 0.408874 |
| CA13        | -0.431675616 | 0.006836 | -0.585189378 | 0.00025  | -0.463846703 | 0.003497 |
| ELFN1       | 1.025118958  | 0.006841 | 0.002101984  | 0.99574  | 0.65772848   | 0.084105 |
| NDFIP2      | 0.45603034   | 0.006842 | 0.250255099  | 0.13721  | 0.590106727  | 0.000436 |
| EME1        | -0.508163583 | 0.006862 | -0.243584953 | 0.17969  | 0.061958534  | 0.731654 |
| TJP3        | 0.644330589  | 0.006873 | 0.591447253  | 0.01307  | 0.563314621  | 0.018115 |
| DGKB        | 1.423064015  | 0.006896 | 0.09833016   | 0.85371  | 0.72030036   | 0.173351 |
| MGST2       | -0.556000782 | 0.006924 | -0.326334482 | 0.11158  | -0.24214133  | 0.237548 |
| APEH        | -0.344095308 | 0.006928 | -0.230400447 | 0.06972  | -0.191926496 | 0.130558 |
| DAAM2       | 0.80113555   | 0.006937 | 0.869295675  | 0.00335  | 0.704312961  | 0.017569 |
| AMZ2P1      | -0.58894733  | 0.006942 | -0.323740291 | 0.13095  | -0.391741259 | 0.06852  |
| UBALD1      | 0.604742894  | 0.006951 | 0.12741668   | 0.58055  | 0.229321272  | 0.31329  |
| SRRM1       | 0.232466711  | 0.006991 | -0.215302762 | 0.01318  | 0.094011651  | 0.274615 |
| FAM177B     | -0.958092416 | 0.007009 | -0.651977383 | 0.06496  | -1.228180042 | 0.000548 |
| RPL41       | -0.255681413 | 0.007009 | -0.21021528  | 0.02657  | -0.300112779 | 0.001545 |
| GPR183      | 0.842887908  | 0.007017 | -0.080082045 | 0.80307  | 1.289095972  | 2.81E-05 |
| MAST2       | 0.467156903  | 0.00702  | 0.235808672  | 0.17482  | 0.507987404  | 0.003376 |
| C2CD4A      | -1.039606296 | 0.007034 | -0.24170328  | 0.52582  | -0.45859479  | 0.229445 |
| MTF2        | -0.302226    | 0.007048 | -0.129454861 | 0.24606  | 0.132531607  | 0.233309 |
| LRRC41      | 0.480660305  | 0.007058 | 0.237082405  | 0.18402  | 0.279148123  | 0.116381 |
| C19orf48    | -0.370069999 | 0.007112 | -0.315221031 | 0.02123  | -0.412784473 | 0.002594 |
| RPL27A      | -0.30752201  | 0.007115 | -0.081727997 | 0.47414  | -0.154150329 | 0.177023 |
| ECHDC1      | -0.269997319 | 0.007123 | -0.098567096 | 0.3205   | -0.156506235 | 0.115652 |
| BAG3        | 0.33645947   | 0.007129 | 0.073402336  | 0.5576   | 0.127267183  | 0.307446 |
| CCND1       | -0.494570179 | 0.00713  | -0.534320757 | 0.00362  | -0.574215061 | 0.001775 |
| CORO7       | 0.44205756   | 0.007135 | 0.050047246  | 0.76105  | -0.069880594 | 0.671377 |
| SLC25A26    | -0.37702818  | 0.007158 | -0.109186322 | 0.4322   | -0.139950807 | 0.311757 |
| ITPKA       | -0.716989713 | 0.007166 | -0.763669083 | 0.00384  | -1.204904855 | 1.03E-05 |
| ENY2        | -0.31244876  | 0.007179 | -0.003038391 | 0.97903  | -0.098934224 | 0.390497 |
| CCDC93      | 0.44724803   | 0.007187 | 0.130275942  | 0.43242  | 0.295565948  | 0.075114 |
| SEC61G      | -0.312018957 | 0.007186 | 0.049376319  | 0.66725  | 0.132074312  | 0.249097 |
| EPS8L3      | 0.489262997  | 0.007204 | 0.42186051   | 0.02049  | 0.607427516  | 0.000836 |
| RPS29       | -0.389406475 | 0.00721  | 0.088670614  | 0.53975  | -0.084401398 | 0.55953  |
| PILRB       | 0.432530168  | 0.007222 | 0.330345646  | 0.03877  | 0.569686345  | 0.000334 |
| KIAA1191    | 0.352618154  | 0.007231 | -0.031924532 | 0.80822  | -0.054925443 | 0.676058 |
| LIPA        | -0.343441703 | 0.007228 | -0.130658118 | 0.30295  | -0.319339827 | 0.012144 |
| MT-CO1      | 0.526281858  | 0.00726  | 0.079738699  | 0.68418  | 0.096464504  | 0.622661 |
| DHDDS       | 0.289577648  | 0.007267 | 0.206241144  | 0.05498  | 0.173773552  | 0.1049   |
| (HD1-EIF4E) | 0.721748092  | 0.007273 | 0.408434094  | 0.129    | 0.446319515  | 0.097071 |
| CMTM1       | 0.954432924  | 0.007287 | 0.109316533  | 0.76668  | 0.29895902   | 0.410261 |
| ESRRA       | 0.355662541  | 0.007294 | 0.432227854  | 0.00098  | 0.236221576  | 0.07411  |
| RPL39L      | -0.515312373 | 0.007289 | 0.00406566   | 0.98234  | -0.303089008 | 0.102939 |
| THY1        | 0.614514223  | 0.007292 | -0.066454274 | 0.77211  | 0.274597087  | 0.230665 |

|              |              |          |              |         |              |          |
|--------------|--------------|----------|--------------|---------|--------------|----------|
| TMEM106A     | 1.375811867  | 0.007288 | 0.39515484   | 0.45821 | 1.185974839  | 0.020883 |
| SSR4         | -0.359403833 | 0.0073   | -0.126572088 | 0.34317 | -0.470896529 | 0.000433 |
| QDPR         | -0.545180846 | 0.007308 | -0.27862701  | 0.15917 | -0.405329682 | 0.040659 |
| SLC30A7      | 0.273456329  | 0.007306 | 0.361188031  | 0.00038 | 0.200985566  | 0.048121 |
| CCDC90B      | -0.229841425 | 0.007317 | 0.025381605  | 0.76418 | -0.073288571 | 0.38678  |
| RPL10A       | -0.300169241 | 0.007316 | -0.146643379 | 0.18973 | -0.170670555 | 0.126932 |
| DPH6         | -0.605231754 | 0.007322 | -0.333669107 | 0.13523 | -0.591560671 | 0.008075 |
| SEPHS2       | -0.376868947 | 0.007325 | 0.274604707  | 0.0468  | -0.093668559 | 0.500032 |
| CSRNP2       | 0.367370848  | 0.00735  | 0.219059688  | 0.10954 | 0.365059183  | 0.007508 |
| ARID5B       | 0.355888455  | 0.007355 | -0.126571171 | 0.34121 | 0.258177108  | 0.051454 |
| MMP3         | 1.735383793  | 0.007362 | 0.784967903  | 0.22901 | -0.120145402 | 0.85534  |
| RBM44        | -1.141168417 | 0.007362 | -1.146385809 | 0.00601 | -1.088632959 | 0.008698 |
| SLC41A1      | 0.521303455  | 0.007366 | -0.051735547 | 0.7909  | 0.245525596  | 0.20771  |
| CRTAP        | -0.333106631 | 0.007378 | -0.394030354 | 0.00149 | -0.461930601 | 0.000198 |
| MAPK8IP3     | 0.563880621  | 0.007378 | -0.017037151 | 0.93565 | 0.432679795  | 0.039583 |
| PPP1R11      | 0.310455343  | 0.007378 | 0.227659911  | 0.04896 | 0.19724797   | 0.087845 |
| SLC27A2      | -0.864019868 | 0.00738  | -0.558158555 | 0.08117 | -1.241983459 | 0.00012  |
| DGKD         | -0.611193918 | 0.007406 | -0.270944905 | 0.23269 | -0.676115746 | 0.003209 |
| MPHOSPH6     | -0.341368045 | 0.007402 | -0.372111815 | 0.00317 | -0.111539294 | 0.371972 |
| SYNM         | 0.663266769  | 0.007407 | -0.448970264 | 0.07442 | 0.680626128  | 0.005877 |
| NUF2         | -0.493224943 | 0.00742  | -0.030394188 | 0.86632 | 0.071270987  | 0.692319 |
| PPP11-889L3. | -0.574779025 | 0.007423 | -0.554671355 | 0.00879 | -0.319013806 | 0.124739 |
| GBP3         | 0.485629746  | 0.007428 | 0.667861576  | 0.00022 | 0.608763052  | 0.000773 |
| TGIF2        | 0.75144646   | 0.00743  | 0.383693193  | 0.17029 | 0.675226656  | 0.015535 |
| ALDH6A1      | -0.4123273   | 0.007435 | -0.290097056 | 0.05853 | -0.241421947 | 0.115221 |
| MICB         | 1.117090356  | 0.00745  | 0.852032348  | 0.04322 | 0.56426788   | 0.185963 |
| PPP11-777B9. | -2.516168117 | 0.007468 | -0.58682045  | 0.53159 | -1.127875048 | 0.229371 |
| LRRC6        | -0.932885665 | 0.007476 | -0.681796974 | 0.04687 | -0.932677384 | 0.007611 |
| PPP1R14B     | -0.323003425 | 0.00748  | 0.027173021  | 0.81994 | -0.203521122 | 0.089292 |
| CCDC92       | 0.679680634  | 0.007485 | 0.448789966  | 0.07812 | 0.241321126  | 0.344581 |
| ATPAF1       | -0.406143049 | 0.007498 | -0.34882007  | 0.02101 | -0.134440755 | 0.371842 |
| TRIM9        | 1.070880221  | 0.007506 | 0.764231651  | 0.05565 | 0.573777649  | 0.152713 |
| TICAM1       | 0.924773169  | 0.007522 | 0.134363897  | 0.70219 | 0.144325139  | 0.680705 |
| CRTC3        | 0.519645595  | 0.007568 | -0.156717524 | 0.42464 | 0.389325448  | 0.045842 |
| DOPEY2       | -0.55332118  | 0.007566 | -0.625658076 | 0.00248 | -0.544209917 | 0.008535 |
| EVI5         | -0.361798652 | 0.007598 | -0.068061977 | 0.61453 | -0.044129347 | 0.74412  |
| ABHD17A      | 0.546062758  | 0.007636 | 0.077138476  | 0.70701 | -0.0715017   | 0.727595 |
| MTHFD1       | -0.362912617 | 0.007639 | -0.251958947 | 0.06276 | -0.279822602 | 0.038682 |
| PTGER2       | -0.701203416 | 0.007635 | -0.162145848 | 0.53137 | -0.655757764 | 0.012078 |
| DENND4C      | -0.325576131 | 0.007643 | -0.294748208 | 0.0156  | -0.06508105  | 0.593064 |
| PEX6         | -0.328451228 | 0.007648 | -0.203851628 | 0.09442 | -0.414576561 | 0.000713 |
| PRDM6        | 1.407225725  | 0.007664 | 0.994099863  | 0.06097 | 1.013796243  | 0.054912 |
| TTPA         | -0.897197264 | 0.007668 | -0.679831153 | 0.03679 | -1.033951221 | 0.001749 |
| BBS10        | -0.353421142 | 0.007677 | -0.156455478 | 0.2302  | -0.084304288 | 0.515948 |
| LMBRD2       | -0.609628953 | 0.007684 | -0.178724114 | 0.43324 | -0.015430715 | 0.946091 |
| CYTH2        | 0.367964922  | 0.007692 | 0.155032122  | 0.26174 | 0.267400795  | 0.052408 |
| TGFBR2       | -0.320607314 | 0.007705 | -0.457809026 | 0.00014 | -0.409102369 | 0.000663 |

|          |              |          |              |         |              |          |
|----------|--------------|----------|--------------|---------|--------------|----------|
| TPCN1    | 0.43583339   | 0.007712 | -0.26456107  | 0.10734 | -0.027809347 | 0.865218 |
| LTBP4    | 0.561499536  | 0.007716 | 0.023793899  | 0.9105  | -0.017283375 | 0.934912 |
| HOXC8    | 1.086120889  | 0.007764 | 0.191625547  | 0.64395 | 0.0936047    | 0.821607 |
| DCK      | -0.521228084 | 0.007801 | -0.381209605 | 0.04954 | -0.146643001 | 0.449001 |
| HS6ST1   | 0.338658382  | 0.007803 | -0.092838638 | 0.46738 | 0.443098182  | 0.00047  |
| ZNF449   | -0.375720749 | 0.007834 | -0.226341682 | 0.10344 | 0.017251383  | 0.900084 |
| GNG4     | 0.833323937  | 0.007866 | 0.203050444  | 0.51944 | 0.292727598  | 0.352279 |
| PSMA6    | 0.278637505  | 0.007864 | 0.300480865  | 0.00404 | 0.347982257  | 0.000867 |
| FAM13A   | -0.654023082 | 0.007876 | -0.79446647  | 0.00124 | -0.730825674 | 0.002979 |
| LDLR     | 0.300949288  | 0.007874 | 0.00044625   | 0.99686 | 0.200310152  | 0.07682  |
| SMAD1    | 0.574993677  | 0.007871 | 0.403213356  | 0.06247 | 0.652609446  | 0.002501 |
| EHD1     | 0.649012734  | 0.007957 | 0.338521262  | 0.16605 | 0.569637652  | 0.019214 |
| IFNAR2   | 0.543689253  | 0.007953 | 0.652266681  | 0.00141 | 0.416253726  | 0.041786 |
| INCA1    | 0.896620391  | 0.007962 | 0.186371585  | 0.59583 | 0.861719781  | 0.009128 |
| TAB3     | 0.33765963   | 0.007959 | -0.144209608 | 0.25854 | 0.096727177  | 0.446371 |
| DNAH5    | 0.684751434  | 0.007968 | 0.585682359  | 0.02282 | 0.624728378  | 0.015197 |
| FAM208B  | -0.266059558 | 0.00797  | -0.060792092 | 0.54323 | -0.196525253 | 0.049028 |
| TBC1D25  | 0.547795625  | 0.007976 | 0.015604618  | 0.93994 | 0.244793769  | 0.23471  |
| CECR2    | 1.388909252  | 0.007993 | 0.55223099   | 0.29968 | 0.802142446  | 0.127982 |
| LYAR     | -0.515562613 | 0.007995 | -0.221726681 | 0.24953 | -0.161666449 | 0.400286 |
| UQCC2    | -0.414107977 | 0.008046 | -0.173095517 | 0.26341 | -0.303724199 | 0.04978  |
| NDUFS4   | -0.304862394 | 0.00805  | -0.093334858 | 0.41094 | -0.175211042 | 0.122876 |
| IFT122   | -0.438117936 | 0.008056 | -0.166121912 | 0.31091 | -0.538439427 | 0.001087 |
| LRRN2    | 1.222671189  | 0.008068 | -0.136455167 | 0.77185 | 0.191031619  | 0.684599 |
| TMEM92   | 0.602806089  | 0.008069 | 0.183963605  | 0.41929 | 0.200411186  | 0.379402 |
| CARD9    | 1.116529168  | 0.008073 | 0.742069844  | 0.07774 | 1.044535427  | 0.012615 |
| C9orf142 | -0.524340493 | 0.008079 | -0.181898951 | 0.34997 | -0.363986368 | 0.063026 |
| TTC40    | 1.147338207  | 0.008143 | 1.379185427  | 0.00126 | 0.990542774  | 0.020885 |
| GLB1L2   | -0.512801803 | 0.008151 | -0.56164551  | 0.00371 | -0.590571653 | 0.002274 |
| TXNIP    | -0.541735694 | 0.008149 | -0.524163567 | 0.01045 | -0.751792201 | 0.000241 |
| POLE3    | -0.369329158 | 0.008172 | -0.23735822  | 0.08729 | -0.091155578 | 0.509958 |
| PTP4A2   | 0.309897807  | 0.008169 | 0.374411054  | 0.00139 | 0.430419878  | 0.000236 |
| CDC42EP1 | 0.518731495  | 0.008183 | 0.284537584  | 0.147   | 0.138934811  | 0.479121 |
| CAB39L   | -0.462669872 | 0.008187 | -0.176968841 | 0.30667 | -0.443620365 | 0.01076  |
| RQCD1    | 0.243418349  | 0.008193 | 0.132873116  | 0.14852 | 0.325317707  | 0.000373 |
| TCAIM    | -0.303313673 | 0.008222 | -0.06470264  | 0.5681  | -0.135306107 | 0.233025 |
| EMB      | -0.714013893 | 0.008232 | -0.289492138 | 0.28074 | -0.322812907 | 0.228796 |
| LIN9     | -0.418347056 | 0.008232 | -0.323191074 | 0.03843 | -0.151685394 | 0.327718 |
| ZNF33B   | -0.654647658 | 0.008227 | -0.158773306 | 0.51592 | -0.449382625 | 0.066126 |
| KIAA0020 | -0.274829658 | 0.008248 | -0.225105175 | 0.02946 | 0.019935024  | 0.84634  |
| GARS     | 0.385610906  | 0.008259 | 0.208184833  | 0.1536  | 0.396871314  | 0.006476 |
| C2orf61  | -0.699726412 | 0.008271 | -0.059698377 | 0.80771 | -0.320221328 | 0.197884 |
| WWTR1    | 0.557540365  | 0.008331 | 0.600215041  | 0.00445 | 0.173233838  | 0.412533 |
| THNSL1   | -0.403188673 | 0.008338 | -0.15857116  | 0.28625 | -0.37896289  | 0.011587 |
| FAM115A  | -0.19479382  | 0.008356 | -0.021390043 | 0.77077 | -0.133516714 | 0.069034 |
| C8orf37  | -0.41889394  | 0.008377 | -0.041857216 | 0.78231 | -0.337900599 | 0.028562 |
| NUTF2    | 0.2765645    | 0.008374 | 0.278374953  | 0.00785 | 0.401276316  | 0.000124 |

|            |              |          |              |          |              |          |
|------------|--------------|----------|--------------|----------|--------------|----------|
| WBP5       | -0.249801414 | 0.008373 | 0.071103383  | 0.44733  | 0.044903451  | 0.631226 |
| TRIM40     | 2.56866474   | 0.008385 | 0.873729109  | 0.38477  | 3.276808835  | 0.000695 |
| PDHA1      | -0.231871975 | 0.008402 | -0.142878968 | 0.10211  | -0.100238863 | 0.249876 |
| UBE3D      | -0.700147816 | 0.008406 | -0.46305189  | 0.07853  | -0.557924184 | 0.033722 |
| HTR1B      | -1.190183831 | 0.00847  | -0.413520409 | 0.35597  | -1.784919744 | 8.56E-05 |
| CPSF3L     | 0.333222655  | 0.008516 | 0.071153825  | 0.57438  | 0.203807708  | 0.107962 |
| RPL5       | -0.350382682 | 0.008518 | -0.15473397  | 0.24518  | -0.080824454 | 0.543802 |
| TEX10      | -0.324523513 | 0.008523 | -0.306198889 | 0.01268  | -0.00956448  | 0.937624 |
| BCCIP      | -0.294124139 | 0.008537 | -0.15382868  | 0.16626  | -0.055981834 | 0.613092 |
| SCN8A      | -1.133602475 | 0.00859  | -0.081586978 | 0.84778  | -0.632408426 | 0.137371 |
| CDRT1      | 1.641315171  | 0.008604 | 1.059880261  | 0.08818  | 1.217884012  | 0.049145 |
| MLPH       | -0.701290672 | 0.00862  | -0.461964156 | 0.08247  | -0.976643424 | 0.000255 |
| PTCD2      | -0.459138115 | 0.008638 | -0.487177446 | 0.00509  | -0.504022052 | 0.003633 |
| CSTF2T     | -0.258266029 | 0.008688 | -0.143093597 | 0.14211  | -0.101820911 | 0.294919 |
| YAE1D1     | -0.347124566 | 0.008717 | -0.173152538 | 0.18245  | 0.034068876  | 0.790857 |
| NFKBIE     | 0.776686628  | 0.008739 | 0.340287911  | 0.25681  | 0.495555387  | 0.096128 |
| FAM169B    | 2.118830301  | 0.008803 | 1.882853506  | 0.02039  | 2.42397586   | 0.002135 |
| PDZD8      | 0.531694685  | 0.008805 | 0.431226534  | 0.03342  | 0.449224979  | 0.026701 |
| RAB5C      | 0.247594422  | 0.008828 | 0.264787109  | 0.00498  | 0.126910859  | 0.178815 |
| CD274      | 1.87534467   | 0.008832 | 1.302387127  | 0.07224  | 1.947260531  | 0.005953 |
| MRPL15     | -0.319664027 | 0.008852 | -0.098180802 | 0.41197  | -0.117626926 | 0.325515 |
| ENOSF1     | -0.373290555 | 0.008867 | -0.246868574 | 0.08193  | -0.285521107 | 0.044071 |
| STK10      | 0.553232174  | 0.008869 | 0.279246416  | 0.18571  | 0.476195561  | 0.02408  |
| TNIP3      | 1.094525975  | 0.00891  | 1.464947791  | 0.00041  | 0.896558416  | 0.031954 |
| RBMX       | -0.204108025 | 0.008916 | -0.01589151  | 0.83831  | 0.057550025  | 0.459477 |
| STX10      | -0.34180429  | 0.008931 | -0.278416397 | 0.03128  | -0.133919104 | 0.299058 |
| RALY       | -0.228989945 | 0.008939 | 0.013696025  | 0.87518  | 0.000963997  | 0.991159 |
| SCPEP1     | -0.353047106 | 0.00894  | -0.205846444 | 0.12061  | -0.051021888 | 0.700982 |
| PPID       | -0.386552272 | 0.008964 | -0.054594143 | 0.71004  | -0.004777435 | 0.974005 |
| NDNF       | 1.094215541  | 0.008972 | 0.375286018  | 0.37399  | -0.743067486 | 0.088107 |
| NTN1       | 0.908017372  | 0.008975 | 0.711266099  | 0.04073  | 0.327277784  | 0.3472   |
| BMS1       | -0.223188025 | 0.00901  | -0.037178883 | 0.66114  | -0.035706709 | 0.67349  |
| MARS       | 0.331454297  | 0.009013 | 0.349369204  | 0.00588  | 0.331364492  | 0.008988 |
| AC010620.1 | -0.347777354 | 0.009046 | -0.402526428 | 0.00245  | -0.230010774 | 0.082072 |
| CNPY2      | -0.344330044 | 0.009032 | -0.087930461 | 0.50248  | -0.204445326 | 0.11937  |
| DPH5       | -0.338829769 | 0.00904  | -0.189572198 | 0.13667  | -0.017057162 | 0.892819 |
| PRKACB     | -0.548822328 | 0.009049 | 0.105385611  | 0.61419  | -0.515843037 | 0.014027 |
| SH2D3A     | 0.414773029  | 0.009048 | 0.05229002   | 0.74292  | 0.504138364  | 0.001438 |
| SPIN2B     | -0.475743852 | 0.009044 | -0.353430615 | 0.04133  | -0.067678511 | 0.691897 |
| B3GALT5    | 1.003257688  | 0.009056 | 0.396405828  | 0.30362  | -0.299686629 | 0.437984 |
| CD3G       | -1.040925092 | 0.009076 | -0.341369227 | 0.38879  | -1.028205401 | 0.00974  |
| ERLEC1     | -0.277811429 | 0.009081 | -0.068168995 | 0.51906  | -0.1300678   | 0.218835 |
| IGF1R      | 0.542543044  | 0.009078 | -0.077413529 | 0.70992  | 0.169025675  | 0.416509 |
| FKBP9      | -0.254481806 | 0.009102 | -0.400619036 | 4.02E-05 | -0.395655756 | 4.92E-05 |
| PDK4       | -1.182297192 | 0.009099 | -0.40411121  | 0.36278  | -0.898352561 | 0.045551 |
| ELFN2      | 1.710335941  | 0.009114 | 0.2016086    | 0.7644   | 0.222971873  | 0.741895 |
| NCOR2      | 0.595992839  | 0.009113 | 0.315902609  | 0.16752  | -0.07137816  | 0.755814 |

|             |              |          |              |          |              |          |
|-------------|--------------|----------|--------------|----------|--------------|----------|
| DKKL1       | 1.093179008  | 0.009118 | -0.211725941 | 0.63694  | 0.424718981  | 0.322138 |
| PARP12      | 0.533328172  | 0.009133 | 0.65303645   | 0.00131  | 0.47474479   | 0.020082 |
| IGSF3       | 0.408028791  | 0.009138 | 0.292190875  | 0.06132  | 0.040481816  | 0.79583  |
| TCF20       | 0.211989787  | 0.009142 | 0.101399581  | 0.21024  | 0.152802875  | 0.058035 |
| CMPK2       | -0.66022944  | 0.009149 | -0.238140659 | 0.322    | -0.472332175 | 0.053347 |
| ZDHC21      | -0.406979558 | 0.009214 | -0.275301986 | 0.07712  | -0.429749045 | 0.005832 |
| EIF1AXP1    | -0.83362232  | 0.009236 | 0.029829228  | 0.92389  | -0.136852946 | 0.661808 |
| CWC22       | -0.22544728  | 0.009255 | -0.118472022 | 0.1656   | 0.054435369  | 0.520077 |
| FABP2       | 1.86357825   | 0.009251 | 0.696272189  | 0.33344  | 0.905378686  | 0.2077   |
| MYO7B       | 1.667478047  | 0.009253 | 0.848102899  | 0.18641  | 0.65466124   | 0.308487 |
| TDO2        | 1.553114921  | 0.009249 | 1.238779675  | 0.03792  | 1.231580097  | 0.039044 |
| EFCC1       | 0.772856352  | 0.009271 | -0.337182003 | 0.27942  | 0.429707818  | 0.150523 |
| PARPBP      | -0.428623187 | 0.009279 | -0.266218574 | 0.10136  | -0.017762599 | 0.912365 |
| KLHL17      | 0.712634123  | 0.009293 | 0.193635704  | 0.48467  | 0.174247153  | 0.532224 |
| ZNF677      | 0.370422447  | 0.009291 | 0.082835428  | 0.56221  | 0.31221584   | 0.027683 |
| CCDC64B     | 0.505229069  | 0.009301 | 0.116111774  | 0.55221  | -0.016900658 | 0.931072 |
| METTL5      | -0.300190361 | 0.009314 | -0.00686486  | 0.95158  | -0.13791171  | 0.223726 |
| GSDMC       | 1.669829581  | 0.009328 | 0.762293132  | 0.25324  | 0.766272308  | 0.246015 |
| ARIH2       | 0.218526782  | 0.009343 | 0.075389116  | 0.36804  | 0.183952788  | 0.027568 |
| EDEM3       | -0.38014938  | 0.009338 | -0.158119708 | 0.27898  | -0.33146374  | 0.023311 |
| IKBKB       | 0.408979332  | 0.009334 | 0.011031658  | 0.94409  | 0.254470367  | 0.104397 |
| MTR         | -0.246972197 | 0.009344 | -0.10616264  | 0.26257  | -0.16169754  | 0.087689 |
| MARK2       | 0.322143571  | 0.009361 | 0.03252086   | 0.79393  | -0.01637387  | 0.895207 |
| GRHL2       | -0.409326001 | 0.009398 | -0.195417463 | 0.2139   | -0.301984242 | 0.054559 |
| POLR3K      | -0.521906432 | 0.009399 | -0.244534202 | 0.21087  | -0.357670358 | 0.06966  |
| IP13-128O4. | 1.051134532  | 0.009406 | 0.477390163  | 0.25163  | 0.563486593  | 0.171089 |
| ZNF180      | -0.348513622 | 0.009403 | -0.048868251 | 0.7108   | 0.015422981  | 0.906077 |
| SEPW1       | -0.253900862 | 0.009418 | -0.184566672 | 0.05806  | -0.278834917 | 0.004208 |
| PTHLH       | 1.84070771   | 0.009435 | 2.63459971   | 0.00019  | 0.847679861  | 0.234675 |
| TAF7        | -0.233123024 | 0.009433 | -0.049305201 | 0.57953  | 0.047322177  | 0.593739 |
| S1PR2       | 0.70609737   | 0.009465 | 0.294296212  | 0.28032  | 0.129731909  | 0.634481 |
| CCNYL2      | -1.636072794 | 0.009471 | -0.270025257 | 0.62908  | -0.961333966 | 0.097778 |
| ABCA1       | 0.591904932  | 0.009479 | 0.439420162  | 0.05406  | 0.354554921  | 0.120118 |
| CKAP4       | 0.211788432  | 0.009492 | 0.263101155  | 0.00124  | 0.153549009  | 0.05958  |
| XPO4        | -0.277249461 | 0.009501 | -0.122021415 | 0.25025  | -0.114872657 | 0.278518 |
| FKTN        | -0.475305162 | 0.009514 | 0.020721478  | 0.90957  | -0.337948636 | 0.064359 |
| HMGB1P14    | 0.995629852  | 0.009514 | 0.480268751  | 0.22449  | 0.665792603  | 0.085215 |
| RAD21       | -0.246573898 | 0.00953  | -0.024319797 | 0.79746  | 0.034301975  | 0.717077 |
| GBGT1       | 0.714021371  | 0.00956  | 0.524516504  | 0.05594  | 0.063942843  | 0.820894 |
| SWAP70      | 0.322572592  | 0.009574 | 0.487812875  | 7.21E-05 | 0.439613459  | 0.000347 |
| TAS2R4      | -0.891788442 | 0.009573 | -0.796924869 | 0.01826  | -0.504235389 | 0.12719  |
| ARPC3       | -0.227617898 | 0.009587 | 0.033284791  | 0.70334  | -0.042654316 | 0.625648 |
| C14orf166   | -0.213003957 | 0.009584 | -0.081328588 | 0.32001  | 0.087547136  | 0.283507 |
| TYRO3       | -0.354295197 | 0.009614 | -0.730100824 | 9.75E-08 | -0.594725818 | 1.37E-05 |
| CDC45       | -0.672077972 | 0.009621 | -0.39022434  | 0.12963  | -0.224926503 | 0.381221 |
| RAB3GAP2    | 0.297391549  | 0.00964  | 0.359039441  | 0.00172  | 0.200718636  | 0.079646 |
| FCGRT       | -0.373610119 | 0.009663 | -0.415091296 | 0.00402  | -0.662704605 | 4.49E-06 |

|             |              |          |              |         |              |          |
|-------------|--------------|----------|--------------|---------|--------------|----------|
| RELT        | 0.64658968   | 0.00968  | 0.690091036  | 0.00553 | 0.669301621  | 0.006935 |
| WDR93       | 1.265823404  | 0.009678 | 0.726390442  | 0.14174 | 0.647058608  | 0.189916 |
| SIX5        | 0.795142844  | 0.009698 | -0.262036996 | 0.40263 | -0.198262957 | 0.524545 |
| ATP1B2      | 0.994084725  | 0.009756 | 0.181836812  | 0.64024 | -0.561945085 | 0.157636 |
| BAI3        | 0.761925016  | 0.009745 | 0.262716471  | 0.37523 | 0.992207774  | 0.000695 |
| PAX5        | 1.529772406  | 0.009753 | 1.617167132  | 0.00594 | 0.895858111  | 0.136603 |
| PIP5K1A     | 0.303500003  | 0.009758 | -0.019169967 | 0.87025 | 0.350805095  | 0.0027   |
| RUSC1       | 0.284265925  | 0.00975  | -0.066962584 | 0.54722 | -0.042362436 | 0.701224 |
| P11-697N18  | 1.201163288  | 0.00977  | 0.59990403   | 0.20791 | 0.637327433  | 0.178211 |
| BHMT        | -1.184871878 | 0.009784 | -0.719020659 | 0.09795 | -1.515876094 | 0.000856 |
| CLDN9       | -0.884231562 | 0.009782 | -0.512678703 | 0.11252 | -0.54941169  | 0.088151 |
| MCCC1       | -0.460152151 | 0.009777 | -0.31655399  | 0.07378 | -0.257452637 | 0.145178 |
| SQSTM1      | 0.497721564  | 0.009788 | 0.370378774  | 0.05452 | 0.497448595  | 0.009782 |
| STX3        | -0.512795642 | 0.009812 | -0.509195841 | 0.01024 | -0.323193661 | 0.1028   |
| ADAMTS2     | 1.251412722  | 0.009824 | 1.586841832  | 0.00101 | 0.828790167  | 0.089093 |
| UQCR11      | 0.300676891  | 0.009835 | -0.07577092  | 0.51772 | -0.348374792 | 0.003074 |
| RPL35A      | -0.296207258 | 0.00984  | -0.078124347 | 0.4954  | -0.168029926 | 0.142613 |
| ZNF592      | 0.227026092  | 0.009856 | -0.069354994 | 0.43225 | -0.086346673 | 0.327131 |
| BRE         | -0.341564642 | 0.009867 | -0.223096777 | 0.08806 | -0.185782156 | 0.15501  |
| MCM10       | -0.605509805 | 0.009864 | -0.494763462 | 0.03432 | -0.268420322 | 0.250095 |
| REEP4       | 0.375405441  | 0.009874 | 0.191591787  | 0.18493 | 0.100655628  | 0.489498 |
| CCDC17      | 0.86084217   | 0.009897 | 0.535416622  | 0.10865 | 0.962570769  | 0.003402 |
| CPA6        | -1.52838109  | 0.009899 | -0.66119903  | 0.22184 | -1.940263483 | 0.001216 |
| OSBPL3      | -0.33944308  | 0.009894 | -0.253457365 | 0.05231 | -0.33415277  | 0.010609 |
| ST6GALNAC   | 0.552157998  | 0.009902 | 0.336792853  | 0.11508 | 0.249287661  | 0.243512 |
| PDE7A       | -0.215591366 | 0.009925 | -0.021142084 | 0.79773 | 0.070042629  | 0.394067 |
| C19orf10    | -0.338938194 | 0.009938 | -0.090970566 | 0.48532 | -0.309910288 | 0.017748 |
| STK38L      | -0.353791268 | 0.00994  | 0.207620546  | 0.12874 | -0.003382595 | 0.980272 |
| TARS2       | -0.307730364 | 0.009932 | -0.091706279 | 0.43304 | -0.168929499 | 0.149906 |
| ZNF281      | 0.260677774  | 0.009954 | 0.093353664  | 0.35574 | 0.479289599  | 1.77E-06 |
| RANBP2      | -0.182752699 | 0.009967 | -0.087788619 | 0.21464 | 0.004745984  | 0.94645  |
| BDH2        | -0.369056447 | 0.009987 | -0.314639033 | 0.02699 | -0.07680486  | 0.586493 |
| COBLL1      | -0.493604846 | 0.009983 | -0.359303687 | 0.06028 | -0.637980294 | 0.000859 |
| FRS3        | 0.63502935   | 0.009994 | 0.147611114  | 0.5589  | -0.117574079 | 0.640911 |
| IFT74       | -0.357226563 | 0.009993 | -0.284063782 | 0.03834 | -0.101732281 | 0.456056 |
| LPL         | 1.891399519  | 0.009985 | 2.081197977  | 0.00444 | 2.210183983  | 0.002498 |
| CD96        | -1.377791089 | 0.01001  | -0.714321894 | 0.17566 | -2.704422398 | 7.95E-07 |
| P11-1396O15 | -1.808482418 | 0.010035 | -1.184545851 | 0.07427 | -1.35208833  | 0.042919 |
| MRPL42      | -0.333407257 | 0.010056 | -0.150174999 | 0.24536 | -0.152695814 | 0.23749  |
| CACNG8      | 0.479860744  | 0.01008  | 0.357201633  | 0.05478 | 0.152929691  | 0.414331 |
| C16orf62    | -0.27166152  | 0.010117 | -0.081586059 | 0.4353  | -0.245644148 | 0.019345 |
| DMC1        | -1.002835087 | 0.010121 | 0.286653598  | 0.43833 | -0.389439561 | 0.299407 |
| LY6H        | 6.336879712  | 0.010129 | 4.993318124  | 0.04351 | 6.262927862  | 0.010998 |
| 1-Mar       | -0.876436309 | 0.010126 | -0.645892504 | 0.0576  | -0.863237262 | 0.011224 |
| MGAT3       | 0.361772591  | 0.010124 | 0.139050804  | 0.32271 | 0.387532689  | 0.005757 |
| NTAN1       | -0.42400354  | 0.010132 | -0.010426224 | 0.94912 | -0.035182402 | 0.829221 |
| TMEM18      | -0.347536039 | 0.010147 | -0.222481874 | 0.0948  | -0.157420273 | 0.236222 |



|            |              |          |              |          |              |          |
|------------|--------------|----------|--------------|----------|--------------|----------|
| ALS2CL     | 0.643580923  | 0.010154 | 0.590158236  | 0.01818  | 0.800898242  | 0.001318 |
| NPM1       | -0.288930147 | 0.010173 | -0.154654248 | 0.16881  | -0.016758502 | 0.881445 |
| LGR4       | -0.309356172 | 0.010178 | -0.168735814 | 0.1606   | -0.030980164 | 0.796613 |
| GPR137     | 0.55208374   | 0.010184 | 0.427661741  | 0.04486  | 0.213845031  | 0.318167 |
| ST3GAL3    | 0.574864183  | 0.010208 | 0.360601833  | 0.10775  | 0.343827386  | 0.122221 |
| AC243772.2 | 0.490199879  | 0.01024  | 0.137359385  | 0.47559  | 0.218160851  | 0.25394  |
| PDIA6      | -0.25497213  | 0.010244 | -0.149494227 | 0.13191  | -0.126815997 | 0.201145 |
| SCAMP2     | 0.408806548  | 0.01025  | 0.182386321  | 0.25172  | -0.026477234 | 0.868027 |
| PPP2R5A    | -0.275393653 | 0.010255 | -0.019413255 | 0.85533  | -0.105881005 | 0.320035 |
| FBXO10     | 0.664635961  | 0.010277 | 0.281656166  | 0.27909  | 0.335645324  | 0.19523  |
| PCBD1      | -0.403241756 | 0.010286 | -0.251831753 | 0.10752  | -0.379388246 | 0.015434 |
| CHRNA5     | -0.724927597 | 0.010292 | -1.216916364 | 1.98E-05 | -0.489084951 | 0.081351 |
| CYP7B1     | 1.318879042  | 0.010305 | 1.12015905   | 0.0292   | 0.786507448  | 0.127651 |
| DENR       | -0.180829663 | 0.010316 | -0.041544098 | 0.55131  | -0.064841137 | 0.352804 |
| CPA3       | -1.715883092 | 0.01036  | -0.30433701  | 0.63451  | -0.576038773 | 0.375426 |
| DMTF1      | 0.317878865  | 0.010365 | 0.061787169  | 0.61797  | 0.269467321  | 0.029157 |
| NAA16      | -0.409353607 | 0.010378 | -0.321344726 | 0.04295  | -0.15602807  | 0.324951 |
| RSRC1      | -0.285432016 | 0.010388 | -0.134734988 | 0.22205  | -0.040598721 | 0.711503 |
| ACTR10     | 0.293691977  | 0.010397 | 0.222972888  | 0.04985  | 0.240528405  | 0.034399 |
| GSPT2      | -0.304183007 | 0.010433 | -0.057674275 | 0.62201  | 0.010187024  | 0.93036  |
| INTS7      | -0.4735086   | 0.010428 | 0.047583024  | 0.79614  | -0.057525252 | 0.754445 |
| KLF9       | 0.882510836  | 0.010429 | 0.08551963   | 0.80589  | 0.899684823  | 0.008811 |
| UNGP1      | 1.252991582  | 0.010423 | 0.696054568  | 0.16668  | 0.617243786  | 0.220466 |
| ARHGAP11A  | -0.454018025 | 0.010438 | -0.020835423 | 0.90607  | 0.025516469  | 0.885    |
| MRPL20     | -0.249037335 | 0.01045  | -0.054360942 | 0.57071  | -0.119325032 | 0.213439 |
| KDM5A      | 0.198705028  | 0.010455 | 0.038419807  | 0.61915  | 0.148912235  | 0.053591 |
| MAP4       | 0.414183807  | 0.010458 | 0.266324654  | 0.09976  | 0.221160008  | 0.171637 |
| EBAG9      | -0.374080712 | 0.010502 | -0.193888438 | 0.17812  | -0.243324797 | 0.091201 |
| TMEM136    | 0.46986172   | 0.010553 | 0.517408498  | 0.00451  | 0.432532994  | 0.017908 |
| DPH3       | 0.357017022  | 0.010582 | 0.265677787  | 0.05628  | 0.407767035  | 0.003282 |
| TBC1D30    | -0.538816553 | 0.010586 | -0.518942559 | 0.01289  | -0.588906413 | 0.004677 |
| RNF128     | -0.511182456 | 0.010611 | -0.217954938 | 0.27546  | -0.430216323 | 0.031393 |
| ELMSAN1    | 0.381597017  | 0.010639 | -0.028782476 | 0.84761  | 0.085674949  | 0.566665 |
| GBP5       | 0.7826053    | 0.010641 | 0.311206188  | 0.31151  | 0.491550834  | 0.10833  |
| PABPN1     | 0.359833247  | 0.010639 | 0.004267725  | 0.97585  | 0.312193355  | 0.026442 |
| XRCC2      | -0.428923599 | 0.010653 | -0.191576746 | 0.25059  | -0.247343643 | 0.138106 |
| LACE1      | -0.576290308 | 0.010661 | -0.182152356 | 0.41148  | -0.213271867 | 0.334862 |
| MMP19      | 0.818977229  | 0.010668 | 0.369096527  | 0.25401  | 0.500283733  | 0.119361 |
| HIST1H1D   | -0.586784848 | 0.01068  | -0.042368261 | 0.85341  | -0.040176317 | 0.860897 |
| GLO1       | -0.197528484 | 0.010696 | -0.077047254 | 0.31729  | 0.106027628  | 0.167577 |
| PDX1       | 0.924776165  | 0.010704 | 0.618239672  | 0.08875  | 1.306802659  | 0.000269 |
| LDLRAD3    | 0.64506753   | 0.010718 | 0.457426151  | 0.06998  | 0.344309837  | 0.17459  |
| NCCRP1     | 1.072289194  | 0.010724 | 0.819157496  | 0.05194  | 0.386909346  | 0.366809 |
| CUEDC2     | -0.350076693 | 0.010734 | -0.382884771 | 0.00482  | -0.173604498 | 0.197133 |
| CCDC8      | -0.352997357 | 0.010745 | 0.009511292  | 0.94484  | -0.425077511 | 0.002079 |
| TERF1      | -0.326582159 | 0.010745 | -0.340597548 | 0.00763  | 0.086599383  | 0.49472  |
| NTPCR      | -0.272773504 | 0.010762 | -0.213987419 | 0.04417  | -0.152444591 | 0.14922  |

|             |              |          |              |         |              |          |
|-------------|--------------|----------|--------------|---------|--------------|----------|
| USP35       | 0.596041642  | 0.010766 | 0.388878277  | 0.09661 | 0.342313991  | 0.143024 |
| ECI2        | -0.341029409 | 0.010777 | -0.176584031 | 0.18293 | -0.123324543 | 0.352027 |
| C12orf75    | -0.477581663 | 0.010796 | -0.212302954 | 0.25543 | -0.051416528 | 0.78281  |
| POLI        | -0.393025576 | 0.010799 | -0.35231863  | 0.02208 | -0.2288372   | 0.135524 |
| SLC22A3     | 1.15149182   | 0.010803 | 0.701979054  | 0.1216  | 0.534079747  | 0.239776 |
| SPRED3      | 0.669136095  | 0.010843 | 0.429621726  | 0.1045  | 0.279682473  | 0.289377 |
| NR2C2       | 0.410252374  | 0.010848 | 0.240161082  | 0.13635 | 0.184867611  | 0.250896 |
| KIAA0430    | 0.568440466  | 0.010861 | 0.010471982  | 0.96263 | 0.304591832  | 0.171925 |
| MED24       | 0.331030529  | 0.010861 | 0.199326562  | 0.12495 | -0.000356938 | 0.99781  |
| NSDHL       | 0.32563919   | 0.010887 | 0.323629972  | 0.01115 | 0.491491572  | 0.000109 |
| ALKBH8      | -0.353468301 | 0.010918 | -0.040500838 | 0.76363 | -0.251100156 | 0.063093 |
| CCRN4L      | 0.610596043  | 0.010926 | 0.360654382  | 0.13293 | 0.620913037  | 0.009287 |
| C5orf34     | -0.654793987 | 0.010931 | -0.443055245 | 0.07922 | -0.200664994 | 0.423181 |
| COPRS       | -0.359522421 | 0.010942 | 0.106029878  | 0.43754 | -0.104388856 | 0.447494 |
| RAD51       | -0.576978717 | 0.010939 | -0.272735422 | 0.22161 | -0.501559206 | 0.02561  |
| FGF7        | 0.674942966  | 0.010978 | 0.320913316  | 0.22697 | 0.831914949  | 0.001695 |
| LRCH3       | 0.334610947  | 0.010988 | 0.001668479  | 0.98987 | 0.224249448  | 0.087416 |
| TTC22       | 0.892014323  | 0.011006 | -0.042040997 | 0.90548 | 0.267026653  | 0.448495 |
| SP6         | 1.08549532   | 0.011039 | 0.540867694  | 0.20946 | -0.061000693 | 0.889452 |
| AAR2        | 0.277539477  | 0.011058 | 0.028637144  | 0.7939  | 0.083459266  | 0.444151 |
| PRMT1       | 0.280954018  | 0.011058 | 0.186747135  | 0.09115 | 0.333515944  | 0.002521 |
| JADE1       | -0.964024891 | 0.011079 | -0.769269555 | 0.04212 | -1.038970068 | 0.006102 |
| HDDC2       | -0.285644805 | 0.011087 | -0.023786353 | 0.82983 | -0.235935765 | 0.03383  |
| A2M         | 0.633039284  | 0.011117 | 0.496030463  | 0.04663 | 0.292495458  | 0.240738 |
| DAPK1       | -0.48851919  | 0.011126 | -0.483731858 | 0.0119  | -0.152222706 | 0.428371 |
| CEP290      | -0.321322731 | 0.011135 | -0.124937524 | 0.32163 | -0.123617607 | 0.325714 |
| C4BPA       | 1.629929854  | 0.011177 | 1.424692834  | 0.02643 | 0.565359155  | 0.383103 |
| RP4-765C7.2 | -0.533296239 | 0.011184 | -0.554008078 | 0.00825 | -0.555297677 | 0.00806  |
| NPM1P40     | -0.636762675 | 0.011197 | -0.506752484 | 0.03677 | -0.672534396 | 0.006104 |
| YPEL4       | 0.643927541  | 0.011206 | 0.120393263  | 0.63815 | 0.276557983  | 0.276389 |
| UBE2L6      | 0.567463112  | 0.011213 | 0.79685993   | 0.00033 | 0.540312357  | 0.015298 |
| GGA1        | 0.273924749  | 0.011233 | 0.044149672  | 0.68252 | 0.117516414  | 0.275199 |
| TSC22D4     | 0.412179044  | 0.011281 | 0.069250503  | 0.67149 | -0.011848791 | 0.94228  |
| MMP9        | 2.316200837  | 0.011297 | 2.499985702  | 0.00617 | -0.225188269 | 0.810504 |
| ARL6IP6     | -0.358893831 | 0.011322 | -0.286746313 | 0.04067 | -0.343562813 | 0.014188 |
| RPLP0       | -0.284730463 | 0.011318 | -0.194043181 | 0.08427 | -0.191842787 | 0.08785  |
| EP300       | 0.36836984   | 0.011341 | -0.01828883  | 0.90009 | 0.035025654  | 0.809858 |
| C11orf54    | -0.316994631 | 0.011378 | -0.150004832 | 0.22855 | -0.157557144 | 0.206087 |
| CLSPN       | -0.527148951 | 0.011372 | -0.568350283 | 0.00628 | -0.423970244 | 0.040916 |
| HOXB2       | 0.717532094  | 0.011375 | 0.017141386  | 0.95233 | 0.574552983  | 0.04237  |
| MON1B       | 0.243469192  | 0.011402 | 0.165931573  | 0.08401 | 0.09886545   | 0.302597 |
| BRINP2      | 1.782366318  | 0.011413 | 1.116696317  | 0.11479 | 0.831952134  | 0.241108 |
| EARS2       | -0.284282656 | 0.011417 | -0.237288579 | 0.03371 | -0.053251118 | 0.632131 |
| AC004166.6  | 0.903463963  | 0.011447 | 0.073520044  | 0.84397 | 0.466450288  | 0.197265 |
| CMTM3       | 0.584956897  | 0.011441 | 0.58053575   | 0.01185 | 0.528286871  | 0.022076 |
| FAM210B     | -0.312144234 | 0.011443 | -0.075865481 | 0.53501 | -0.235627341 | 0.054437 |
| GFPT2       | 1.05803239   | 0.011436 | 1.210964706  | 0.00371 | 0.900166332  | 0.031341 |

|            |              |          |              |         |              |          |
|------------|--------------|----------|--------------|---------|--------------|----------|
| AP1S1      | -0.340063427 | 0.011454 | -0.339200978 | 0.01139 | -0.35549557  | 0.007957 |
| ECI1       | -0.429680999 | 0.011464 | -0.239843405 | 0.15137 | -0.373495991 | 0.025746 |
| FZD3       | -0.430659289 | 0.011485 | -0.230232044 | 0.17602 | -0.278266884 | 0.101692 |
| UGGT2      | -0.265070081 | 0.011517 | -0.022640115 | 0.82816 | 0.026462938  | 0.799596 |
| C4orf46    | -0.380758719 | 0.011545 | -0.292913393 | 0.05073 | -0.011064668 | 0.940775 |
| C19orf70   | -0.323229766 | 0.011551 | -0.20394418  | 0.10332 | -0.498171153 | 9.50E-05 |
| MRPL43     | -0.216543405 | 0.011562 | -0.222588611 | 0.00859 | -0.145649003 | 0.082278 |
| ZNF561     | -0.290461755 | 0.011558 | -0.09551528  | 0.40246 | 0.024998783  | 0.825754 |
| SGTA       | 0.366100556  | 0.011569 | 0.070503619  | 0.62727 | 0.143380154  | 0.322639 |
| GCHFR      | -0.405314558 | 0.01158  | -0.120979911 | 0.44101 | -0.424009337 | 0.007623 |
| NUBPL      | -0.434209923 | 0.01158  | -0.228571988 | 0.17722 | -0.193166984 | 0.253618 |
| PTPRH      | 0.570376658  | 0.011584 | 0.407687929  | 0.07123 | 0.494530429  | 0.028569 |
| YPEL2      | 0.461180465  | 0.011591 | 0.286539143  | 0.11625 | 0.531526966  | 0.003532 |
| CENPV      | -0.280910228 | 0.011607 | -0.355884172 | 0.0013  | -0.093547026 | 0.393522 |
| CACYBP     | -0.368359144 | 0.011622 | -0.121793007 | 0.40157 | -0.07299243  | 0.614715 |
| DLD        | -0.204858443 | 0.011623 | 0.021088031  | 0.7932  | 0.060221723  | 0.453159 |
| PPM1H      | -0.522926182 | 0.011655 | -0.203036739 | 0.32548 | -0.709496378 | 0.000609 |
| DUSP10     | 0.457185259  | 0.011712 | 0.215333369  | 0.23786 | 0.620529857  | 0.000544 |
| CC1L-ADOR  | 0.797460362  | 0.011709 | 0.04159086   | 0.89652 | 0.438960953  | 0.166092 |
| RARS       | -0.191725086 | 0.011746 | 0.031514601  | 0.67601 | -0.021767938 | 0.772775 |
| FAM199X    | -0.271933824 | 0.011763 | 0.008531514  | 0.93664 | -0.023749088 | 0.824818 |
| GLUD2      | -0.706711113 | 0.011768 | -0.14470713  | 0.59801 | -0.674494064 | 0.015254 |
| LIMS2      | 1.414624603  | 0.011775 | 0.197951824  | 0.73174 | 0.514077338  | 0.366749 |
| NCKAP1L    | 1.426999441  | 0.011789 | 1.121903596  | 0.05069 | 0.260330106  | 0.6516   |
| BLMH       | -0.389278179 | 0.011798 | -0.198646032 | 0.19528 | 0.053296736  | 0.727307 |
| P11-1143G9 | -1.27550852  | 0.0118   | -0.154394197 | 0.72611 | -0.732775799 | 0.112123 |
| SPATA20    | -0.249800611 | 0.011809 | -0.16496503  | 0.09425 | -0.301213882 | 0.002279 |
| ARL5B-AS1  | -1.03260651  | 0.011835 | -0.549944493 | 0.14579 | -0.315053504 | 0.383928 |
| PLEKHG2    | 0.455170365  | 0.011839 | 0.156876916  | 0.3868  | 0.28024606   | 0.121157 |
| SUPT16H    | -0.209066683 | 0.011832 | -0.176380084 | 0.03331 | -0.04333352  | 0.600389 |
| BAZ2A      | 0.415619276  | 0.011865 | 0.033884793  | 0.83763 | 0.300824988  | 0.06864  |
| B3GAT1     | 0.894516379  | 0.011873 | -0.032859642 | 0.92808 | 0.300294542  | 0.400855 |
| PHF1       | 0.451693019  | 0.011874 | -0.014082765 | 0.93773 | 0.434319428  | 0.015101 |
| TRNAU1AP   | 0.269281102  | 0.011879 | 0.194174902  | 0.06502 | 0.222664849  | 0.033478 |
| SLC45A4    | -0.395530378 | 0.011884 | -0.215927239 | 0.16847 | -0.356002957 | 0.023427 |
| MIB2       | 0.437342351  | 0.011898 | 0.182497631  | 0.2958  | -0.104038717 | 0.552036 |
| RPAP3      | -0.305393511 | 0.011908 | 0.050284688  | 0.67646 | 0.06071005   | 0.613196 |
| NEDD1      | -0.265618353 | 0.011922 | -0.096527256 | 0.35616 | 0.085768225  | 0.410045 |
| RPL11      | -0.320679979 | 0.01193  | -0.174400452 | 0.17136 | -0.132470199 | 0.298768 |
| RPL28      | 0.370082101  | 0.011931 | 0.058441517  | 0.69141 | 0.091490542  | 0.534257 |
| GPR133     | 0.74482939   | 0.011938 | 0.14717492   | 0.62173 | 0.557300194  | 0.060127 |
| CAMTA2     | 0.557385275  | 0.011945 | 0.021587462  | 0.92285 | 0.114076983  | 0.608136 |
| DCAF7      | 0.493973244  | 0.011949 | -0.026999384 | 0.89235 | 0.18123375   | 0.358451 |
| IDH3A      | 0.292944917  | 0.011964 | 0.035460179  | 0.76116 | 0.098251834  | 0.397091 |
| HYPK       | -1.263695128 | 0.011981 | -0.077862658 | 0.87604 | -0.260521705 | 0.602129 |
| FABP5P7    | -0.566106676 | 0.012009 | -0.522812271 | 0.02005 | -0.17839854  | 0.425937 |
| FAM127A    | 0.387738519  | 0.012005 | 0.083981118  | 0.58728 | 0.128390426  | 0.406109 |

|            |              |          |              |         |              |          |
|------------|--------------|----------|--------------|---------|--------------|----------|
| PPP1R10    | 0.471305711  | 0.012006 | 0.259003816  | 0.16742 | 0.601498217  | 0.001341 |
| CYCS       | -0.252646926 | 0.012014 | 0.030849052  | 0.75819 | 0.081627006  | 0.415124 |
| FAM129B    | 0.427134885  | 0.012027 | 0.389342098  | 0.02202 | -0.043140884 | 0.799851 |
| GABRE      | 1.001293796  | 0.012024 | 1.074761238  | 0.00694 | 0.619787418  | 0.120272 |
| FBXW9      | -0.447892503 | 0.012041 | -0.355434695 | 0.04095 | -0.501709096 | 0.004275 |
| SEMA6D     | 0.858979543  | 0.012044 | 0.396786901  | 0.24658 | 0.417038563  | 0.223161 |
| SLC35D2    | -0.33934287  | 0.012044 | -0.203039419 | 0.13136 | -0.162656464 | 0.226313 |
| MYL9       | 0.563233839  | 0.012064 | -0.373587005 | 0.09683 | 0.210872996  | 0.347458 |
| BDNF       | 0.799131401  | 0.01209  | 0.618971272  | 0.05188 | 0.921406212  | 0.003669 |
| CAPN9      | -0.98906881  | 0.012115 | -0.982686077 | 0.01252 | -1.248633657 | 0.001555 |
| GNB2       | 0.285953698  | 0.012126 | 0.240567247  | 0.0345  | 0.112675949  | 0.322838 |
| IER3       | 0.837904351  | 0.012127 | 0.565827966  | 0.09033 | 0.575732138  | 0.0848   |
| LSS        | 0.481758725  | 0.012125 | 0.112257324  | 0.55911 | 0.169348358  | 0.378063 |
| SH3BP5L    | 0.244828526  | 0.012112 | 0.089846183  | 0.35393 | 0.196161513  | 0.042813 |
| C9orf40    | -0.454050092 | 0.012138 | -0.326040017 | 0.06467 | -0.576221659 | 0.001303 |
| EPHA2      | 0.49796406   | 0.012135 | 0.283331647  | 0.15344 | 0.316874849  | 0.110236 |
| PEG10      | 0.548349729  | 0.01215  | 0.301860391  | 0.16812 | 0.281667724  | 0.198865 |
| MLEC       | -0.275778783 | 0.012165 | -0.237078184 | 0.03102 | -0.400544837 | 0.000269 |
| TPM4       | 0.276414374  | 0.012179 | 0.13841595   | 0.20934 | 0.338484914  | 0.002132 |
| CARS2      | -0.233163535 | 0.012192 | -0.163351842 | 0.07565 | -0.007831391 | 0.931952 |
| GFM2       | -0.364011784 | 0.0122   | -0.047399053 | 0.74223 | -0.058560794 | 0.684407 |
| TRAK2      | -0.244525212 | 0.012202 | -0.093932318 | 0.33077 | -0.157031691 | 0.103574 |
| MEX3A      | 0.39538977   | 0.01224  | -0.10964454  | 0.4887  | 0.323299436  | 0.040121 |
| MST4       | -0.342875496 | 0.012239 | -0.122685485 | 0.36768 | -0.088922335 | 0.513818 |
| MTCH1      | 0.225068029  | 0.012235 | 0.252535347  | 0.00482 | 0.160409243  | 0.073538 |
| GET4       | -0.436624301 | 0.012252 | -0.616917941 | 0.00042 | -0.212743361 | 0.218329 |
| FBXO17     | -0.35021752  | 0.012322 | -0.432561385 | 0.00196 | -0.267332781 | 0.053524 |
| ORMDL1     | -0.214373836 | 0.012384 | -0.017589916 | 0.8345  | 0.000635055  | 0.993958 |
| BRSK1      | 0.691274374  | 0.012416 | 0.603322835  | 0.02941 | 0.834411991  | 0.00247  |
| MKL1       | 0.609062003  | 0.01242  | 0.468469935  | 0.05464 | 0.443516859  | 0.069004 |
| HIC1       | 1.125965445  | 0.012437 | -0.010733825 | 0.98127 | -0.377149841 | 0.413443 |
| KRIT1      | -0.432777428 | 0.012444 | 0.021681694  | 0.89975 | 0.046891952  | 0.785164 |
| MAP3K3     | 0.439572473  | 0.012442 | 0.172002239  | 0.32753 | 0.293837061  | 0.09337  |
| RYR2       | 1.105975618  | 0.012453 | 0.766325185  | 0.08327 | 0.821506643  | 0.062342 |
| FXSD3      | -0.431562305 | 0.012463 | -0.305889248 | 0.07638 | -0.559275828 | 0.001199 |
| CDC42BPA   | -0.403702787 | 0.012483 | -0.292647016 | 0.06981 | -0.275855146 | 0.087417 |
| FAM50A     | 0.279275936  | 0.012492 | 0.237836527  | 0.03253 | 0.2336512    | 0.035542 |
| P11-195F19 | -0.859053512 | 0.012487 | -0.044006105 | 0.89415 | -0.521513066 | 0.120782 |
| SERPINB1   | -0.425458905 | 0.012485 | -0.374526037 | 0.02778 | -0.285485781 | 0.093253 |
| WDR37      | 0.328490739  | 0.012484 | 0.256013771  | 0.05036 | 0.279601458  | 0.032121 |
| BMS1P10    | -0.622497712 | 0.012573 | -0.320356888 | 0.18642 | -0.18206403  | 0.448426 |
| LGALS9     | 0.735851725  | 0.012576 | 0.42892524   | 0.14673 | 0.366905807  | 0.214389 |
| PRDX4      | -0.349109939 | 0.012565 | -0.14951635  | 0.28433 | -0.169846064 | 0.223896 |
| RARB       | 0.378248004  | 0.012572 | 0.086153198  | 0.5703  | 0.604501951  | 5.96E-05 |
| P11-583F2. | 0.736399086  | 0.012577 | 0.567324755  | 0.05253 | 0.480844027  | 0.103741 |
| RPL3       | -0.30965944  | 0.01257  | -0.204297344 | 0.09956 | -0.24330546  | 0.049825 |
| TTC37      | -0.231164975 | 0.012587 | -0.020571288 | 0.82343 | -0.089016407 | 0.334028 |

|             |              |          |              |         |              |          |
|-------------|--------------|----------|--------------|---------|--------------|----------|
| HAND1       | 0.991999488  | 0.012627 | -0.539097768 | 0.18631 | 0.712905347  | 0.073202 |
| HCN3        | 0.735495998  | 0.012639 | 0.377860262  | 0.20062 | 0.684259532  | 0.020577 |
| GJB1        | -0.577983093 | 0.012649 | -0.535214404 | 0.02069 | -0.624239674 | 0.006997 |
| ID3         | 0.536671661  | 0.012664 | 0.313817917  | 0.14514 | 0.296288437  | 0.168952 |
| SVEP1       | 0.48133066   | 0.012686 | -0.075615657 | 0.69565 | 0.323761516  | 0.093566 |
| SLC31A2     | 0.683469724  | 0.012704 | 1.028306763  | 0.00011 | 1.1251261    | 1.99E-05 |
| LY6G5B      | 0.559186116  | 0.012716 | 0.075121477  | 0.73997 | 0.478044366  | 0.032628 |
| ADH1C       | -1.287247895 | 0.012728 | 0.25136226   | 0.62462 | -0.43654862  | 0.396054 |
| FRG1        | -0.26042965  | 0.012731 | 0.011461694  | 0.90843 | 0.053604607  | 0.583946 |
| SRPRB       | -0.358006541 | 0.012732 | -0.037473633 | 0.79304 | -0.248437665 | 0.082361 |
| LRPAP1      | -0.328831151 | 0.012739 | -0.274761631 | 0.03706 | -0.358719193 | 0.006509 |
| MIS12       | -0.356689138 | 0.012741 | -0.004378927 | 0.97511 | 0.089006516  | 0.523394 |
| HDX         | 0.562767915  | 0.012753 | 0.29440928   | 0.19405 | 0.668143038  | 0.002772 |
| SAR1A       | 0.239823011  | 0.012772 | 0.296820236  | 0.00197 | 0.273815103  | 0.004279 |
| MYLIP       | -0.36746418  | 0.012786 | -0.211516771 | 0.14602 | -0.637150505 | 1.56E-05 |
| DAPP1       | 1.410878823  | 0.012803 | 1.260803095  | 0.02623 | 0.740876077  | 0.19531  |
| KNOP1       | -0.356042787 | 0.012821 | -0.404773711 | 0.0045  | -0.272047712 | 0.056101 |
| ALAS1       | 0.405086808  | 0.012842 | 0.164917975  | 0.31096 | 0.440723441  | 0.006682 |
| MRPL48      | -0.329832179 | 0.012852 | 0.065045385  | 0.6153  | -0.084046495 | 0.51652  |
| NLGN1       | -0.707832006 | 0.012853 | 0.111735038  | 0.69031 | -0.896927829 | 0.001566 |
| ROCK1       | -0.28554987  | 0.012852 | 0.011993596  | 0.91663 | 0.041277574  | 0.718348 |
| XPA         | -0.422490408 | 0.012855 | 0.002877527  | 0.98618 | 0.151044065  | 0.358486 |
| SRBD1       | -0.282508536 | 0.01288  | 0.261063525  | 0.01928 | -0.094006353 | 0.401976 |
| CD4         | 0.834705922  | 0.012887 | 0.134478632  | 0.70245 | 0.446363619  | 0.185516 |
| PSMC1P1     | 0.276918613  | 0.012891 | 0.401751751  | 0.00028 | 0.488532164  | 9.77E-06 |
| ELOF1       | 0.289615898  | 0.012897 | 0.156310152  | 0.1785  | 0.164849703  | 0.154325 |
| TMEM8A      | 0.319288269  | 0.012901 | 0.182540804  | 0.15505 | -0.087672154 | 0.49555  |
| C5orf30     | -0.3650505   | 0.012925 | -0.077773655 | 0.5929  | -0.237859838 | 0.10273  |
| DENND4B     | 0.406028642  | 0.012945 | 0.083807475  | 0.60938 | 0.209086061  | 0.201196 |
| FAM155A     | 0.693669145  | 0.012948 | 0.557790156  | 0.04534 | 0.35758073   | 0.201691 |
| FUCA1       | -0.273029726 | 0.012944 | -0.078093338 | 0.47281 | -0.421529886 | 0.00012  |
| MAFF        | 0.671420227  | 0.012947 | 0.337401475  | 0.21231 | 0.732837877  | 0.006555 |
| RP6-24A23.6 | 2.220092787  | 0.012928 | 2.594095702  | 0.00332 | 2.087740544  | 0.019123 |
| SORBS3      | 0.477834111  | 0.012941 | -0.358877034 | 0.06407 | -0.077577458 | 0.688483 |
| ZNF131      | -0.29741119  | 0.012922 | -0.179618891 | 0.13035 | -0.052493347 | 0.657668 |
| PCMTD2      | -0.331967144 | 0.012968 | -0.266207457 | 0.04456 | -0.326164574 | 0.013687 |
| SLC22A23    | 0.515097904  | 0.012984 | 0.424807968  | 0.04009 | 0.239114714  | 0.248526 |
| RPL7        | -0.282909244 | 0.012995 | -0.168029866 | 0.14002 | -0.129927031 | 0.253797 |
| ZCCHC4      | -0.382198923 | 0.013011 | -0.201469464 | 0.18096 | -0.308297818 | 0.040897 |
| DAB1        | 1.282020373  | 0.013021 | 0.224282726  | 0.66734 | 0.606315985  | 0.241947 |
| GPRC5A      | 0.634283232  | 0.013073 | 0.026141773  | 0.91858 | 0.225488121  | 0.377773 |
| SCAMP4      | 0.358062943  | 0.01308  | -0.047716103 | 0.7439  | 0.021453623  | 0.882523 |
| CAP1        | 0.237557208  | 0.013099 | 0.324672305  | 0.00069 | 0.302197975  | 0.001582 |
| CRCP        | -0.249749459 | 0.013097 | -0.117246551 | 0.24028 | -0.221255721 | 0.027062 |
| EID1        | -0.332363698 | 0.013089 | -0.114436812 | 0.39231 | -0.140328551 | 0.29391  |
| FIG4        | -0.481019303 | 0.013102 | -0.378703164 | 0.04885 | -0.008719044 | 0.963789 |
| CHST9       | -0.743612849 | 0.013131 | -0.173029695 | 0.55409 | -0.221428245 | 0.449341 |

|            |              |          |              |         |              |          |
|------------|--------------|----------|--------------|---------|--------------|----------|
| FAM84A     | 0.740574259  | 0.01313  | 0.365651401  | 0.22138 | 0.661878624  | 0.02655  |
| NOSTRIN    | -0.655597814 | 0.013131 | -0.494664847 | 0.06157 | -0.529370503 | 0.044657 |
| POLQ       | -0.520841947 | 0.013134 | -0.102068962 | 0.62448 | -0.084432404 | 0.685091 |
| DUSP8P5    | 0.841761117  | 0.013141 | 0.310597226  | 0.37534 | 0.372507009  | 0.281861 |
| GPR37      | 0.956101182  | 0.013154 | 0.207358132  | 0.59748 | 0.970942272  | 0.01128  |
| NMNAT3     | -0.956083602 | 0.013189 | -0.556317014 | 0.12824 | -1.465915352 | 0.000136 |
| MRPL54     | -0.303197354 | 0.013204 | 0.005692002  | 0.96127 | -0.217860965 | 0.066565 |
| C6orf203   | 0.402764789  | 0.013222 | 0.425802189  | 0.00823 | 0.493866671  | 0.002115 |
| FAM177A1   | 0.279851951  | 0.013241 | 0.337890397  | 0.00259 | 0.363417459  | 0.001184 |
| LRP6       | 0.316793478  | 0.013239 | 0.054079337  | 0.67184 | 0.039332969  | 0.757622 |
| TBX19      | 0.920212852  | 0.013233 | -0.150094763 | 0.70044 | -0.00703564  | 0.985418 |
| ZNF30      | -0.717323697 | 0.013231 | -0.199510659 | 0.47741 | -0.791037215 | 0.005388 |
| KCTD9      | 0.247575794  | 0.013252 | 0.295555925  | 0.00286 | 0.311830703  | 0.001611 |
| SF3B1      | -0.186388329 | 0.013253 | -0.035587916 | 0.63583 | 0.048065289  | 0.522137 |
| ADAM2      | -0.84485309  | 0.013267 | -0.13878432  | 0.67078 | -1.025617741 | 0.002787 |
| BATF2      | 1.179556967  | 0.013301 | 0.633109997  | 0.19037 | -0.023496684 | 0.962995 |
| CC2D1A     | 0.288885716  | 0.013308 | 0.033777483  | 0.77232 | -0.016060065 | 0.890943 |
| SRRM2      | 0.498007617  | 0.013323 | -0.105974924 | 0.59872 | 0.196349152  | 0.329303 |
| SNX4       | -0.249997586 | 0.013354 | -0.01269993  | 0.8989  | 0.108017998  | 0.278621 |
| DERL2      | -0.269712288 | 0.013401 | 0.113401005  | 0.29398 | -0.003728625 | 0.97242  |
| HSPA1L     | 1.739161771  | 0.013398 | 0.460294453  | 0.51507 | 0.038913581  | 0.956267 |
| MN1        | 1.215777873  | 0.013416 | 0.555559241  | 0.25888 | 0.560330627  | 0.257422 |
| CLPTM1L    | -0.294619275 | 0.013428 | -0.119280689 | 0.3129  | -0.294515771 | 0.012998 |
| RPLP2      | -0.353726651 | 0.013455 | -0.271306417 | 0.05783 | -0.319655452 | 0.025434 |
| P11-255H23 | -0.51574608  | 0.013488 | -0.266656743 | 0.19868 | -0.541169974 | 0.009295 |
| VPS28      | 0.232606974  | 0.013514 | -0.096771464 | 0.30749 | -0.00066704  | 0.994344 |
| CYB5R3     | 0.37673188   | 0.013524 | -0.092729603 | 0.54433 | -0.231410355 | 0.13085  |
| ZMYM5      | -0.291947369 | 0.013538 | -0.110172201 | 0.34131 | -0.089441815 | 0.439119 |
| ARHGAP12   | -0.250559046 | 0.013547 | -0.133978676 | 0.18457 | -0.151589448 | 0.133317 |
| PAM16      | -0.601213034 | 0.013569 | -0.605932005 | 0.01232 | -0.6589238   | 0.00656  |
| EYA3       | 0.27807695   | 0.013588 | 0.019634298  | 0.86176 | 0.280634083  | 0.012456 |
| RPL13      | -0.295831188 | 0.013592 | -0.218508525 | 0.06814 | -0.351420511 | 0.003355 |
| TMEM255B   | 1.268793216  | 0.013604 | 1.687583608  | 0.00098 | 0.884739025  | 0.087181 |
| ERGIC2     | -0.294016197 | 0.013623 | 0.060713368  | 0.6059  | -0.038274384 | 0.747283 |
| LPAL2      | 1.166428176  | 0.013626 | 0.291683961  | 0.54336 | 0.93540417   | 0.047935 |
| SNTB1      | -0.446300695 | 0.013653 | -0.567968786 | 0.00167 | -0.536846666 | 0.002953 |
| UST        | 0.762048762  | 0.013666 | 1.03133621   | 0.00083 | 1.446710506  | 2.55E-06 |
| TRAF4      | 0.288957609  | 0.013722 | 0.041607738  | 0.72252 | 0.296993638  | 0.011036 |
| ZNF136     | -0.459644067 | 0.013728 | -0.357839335 | 0.0526  | -0.155030943 | 0.400027 |
| CYP4F11    | 1.204244911  | 0.013752 | 0.522561842  | 0.29829 | 0.686425448  | 0.166315 |
| WEE1       | -0.263114704 | 0.013818 | -0.146079817 | 0.16962 | -0.019885988 | 0.851167 |
| NDUFB11    | -0.29734745  | 0.013823 | -0.117741909 | 0.32339 | -0.233091848 | 0.051239 |
| RPS2P5     | -0.662459808 | 0.013941 | -0.124303387 | 0.63719 | -0.368283751 | 0.164373 |
| WLS        | -0.317883694 | 0.01394  | -0.352540354 | 0.00615 | -0.508789492 | 7.97E-05 |
| COL7A1     | 0.740428652  | 0.013963 | 0.202314871  | 0.50311 | 0.533603162  | 0.076779 |
| BTNL8      | 1.033475156  | 0.014007 | 0.355162459  | 0.40531 | 0.000389546  | 0.999281 |
| GPATCH2    | -0.252271794 | 0.014014 | -0.111941013 | 0.26985 | 0.002359242  | 0.981317 |

|             |              |          |              |          |              |          |
|-------------|--------------|----------|--------------|----------|--------------|----------|
| FAR1        | -0.326212437 | 0.01402  | -0.016719126 | 0.89952  | -0.210600468 | 0.111954 |
| NARS2       | -0.444787129 | 0.014025 | -0.425232861 | 0.0177   | -0.461951962 | 0.009941 |
| SNX14       | -0.317943084 | 0.014033 | 0.046449163  | 0.71852  | -0.014561732 | 0.910007 |
| LURAP1L     | -0.467732638 | 0.014076 | -0.580759313 | 0.00222  | -0.292535213 | 0.119602 |
| CPSF3       | -0.28165788  | 0.014082 | -0.102856908 | 0.36589  | -0.000369691 | 0.997402 |
| PXDN        | 0.387715692  | 0.014105 | 0.056039774  | 0.72289  | 0.081571068  | 0.605656 |
| ZBTB6       | -0.247725645 | 0.014106 | -0.084107043 | 0.39484  | -0.032908881 | 0.737705 |
| TM9SF4      | 0.215506859  | 0.014114 | -0.117640252 | 0.18096  | 0.004868784  | 0.955751 |
| PPP4R1L     | 0.579612229  | 0.014122 | -0.27876229  | 0.2412   | 0.130525286  | 0.579425 |
| INHBA       | 0.980986879  | 0.014201 | 1.097940165  | 0.00601  | 0.595361554  | 0.136759 |
| ZFAND5      | 0.200307309  | 0.0142   | 0.23431534   | 0.004    | 0.336801633  | 3.45E-05 |
| AVEN        | -0.641096067 | 0.014213 | -0.768947927 | 0.00321  | -0.33045843  | 0.202803 |
| GRIA2       | 1.883998514  | 0.014214 | 2.166214961  | 0.00483  | 1.7951076    | 0.019184 |
| DYRK3       | 0.73252346   | 0.014229 | 1.017216507  | 0.00057  | 0.910060211  | 0.002084 |
| MUC17       | 1.87709491   | 0.01425  | 0.271562186  | 0.72405  | -0.138990864 | 0.859204 |
| ALG1        | -0.328745533 | 0.014265 | -0.284935588 | 0.03156  | -0.311481    | 0.019153 |
| TESC        | -0.963693629 | 0.014286 | -0.522718624 | 0.1826   | -1.012600685 | 0.009966 |
| PPME1       | 0.310698637  | 0.014312 | 0.125390809  | 0.32257  | 0.174054287  | 0.169147 |
| TMEM171     | -1.312786933 | 0.014312 | -0.767492793 | 0.13778  | -1.629369896 | 0.002335 |
| PSTPIP2     | 0.754965173  | 0.014343 | 0.918801117  | 0.00272  | 0.824914921  | 0.0072   |
| CHMP5       | -0.293605245 | 0.014365 | -0.006274091 | 0.95786  | -0.107902235 | 0.363912 |
| UTP18       | -0.434123329 | 0.014366 | -0.189239319 | 0.28287  | -0.267298348 | 0.129946 |
| UBE2D3      | 0.235893071  | 0.014377 | 0.242161104  | 0.01186  | 0.486474131  | 4.19E-07 |
| WBSCR22     | -0.36265136  | 0.014382 | -0.084470853 | 0.56543  | -0.398763077 | 0.006827 |
| GALNT5      | -0.474253615 | 0.014396 | -0.307619617 | 0.11144  | -0.266990569 | 0.166749 |
| USP18       | -0.678600286 | 0.014416 | 0.061210037  | 0.81376  | -0.771382012 | 0.004864 |
| AMOTL1      | 0.371737064  | 0.014425 | -0.030010396 | 0.84343  | 0.121914369  | 0.422136 |
| GAREM       | 0.385490479  | 0.014436 | 0.284501913  | 0.07066  | 0.602970848  | 0.000126 |
| NDST1       | 0.391003345  | 0.014439 | -0.105315999 | 0.51053  | 0.021600609  | 0.892477 |
| TBCE        | -0.262042138 | 0.01445  | -0.271928111 | 0.01022  | -0.134914748 | 0.198108 |
| RPS13       | -0.270449979 | 0.014492 | -0.060349669 | 0.58489  | -0.1420602   | 0.19852  |
| MXRA7       | 0.293075876  | 0.014498 | 0.035020135  | 0.77033  | 0.387907833  | 0.001165 |
| ERGIC1      | -0.276896182 | 0.014513 | -0.523069292 | 3.82E-06 | -0.431732269 | 0.000135 |
| TMED10      | -0.268505954 | 0.014513 | -0.146439084 | 0.18218  | -0.255601224 | 0.019862 |
| C11orf49    | -0.332104258 | 0.014551 | -0.06974241  | 0.60426  | -0.332801704 | 0.013932 |
| LTB4R2      | 0.687887924  | 0.014549 | 0.616884126  | 0.02821  | 0.832625647  | 0.002572 |
| SV2A        | 0.555889369  | 0.014565 | 0.186883656  | 0.41294  | 0.264267153  | 0.245718 |
| KLHL14      | 1.259682668  | 0.014571 | 0.292427845  | 0.57229  | 0.521461571  | 0.313069 |
| FBXO48      | 0.519966303  | 0.014587 | 0.298795755  | 0.16182  | 0.181172724  | 0.398101 |
| FTSJ2       | -0.317915606 | 0.014621 | -0.030223284 | 0.81322  | -0.068333855 | 0.592858 |
| RILPL1      | 0.438209228  | 0.014638 | 0.463526727  | 0.00951  | 0.549636649  | 0.002063 |
| CD99P1      | 0.495877583  | 0.014652 | 0.450900248  | 0.02371  | 0.23342215   | 0.247839 |
| PARD3B      | -0.850812126 | 0.014652 | -0.733031729 | 0.03449  | -0.728159486 | 0.036881 |
| CMC2        | -0.310927428 | 0.014672 | -0.221808222 | 0.07953  | -0.071285901 | 0.570168 |
| RPL3P2      | -0.427636973 | 0.014671 | -0.140562016 | 0.41672  | -0.356617442 | 0.040125 |
| NREP        | 0.499487257  | 0.014682 | -0.028855857 | 0.88794  | 0.498531491  | 0.014837 |
| !P11-15H20. | -0.476942864 | 0.01469  | -0.314303956 | 0.10681  | -0.420542604 | 0.030615 |

|          |              |          |               |          |              |          |
|----------|--------------|----------|---------------|----------|--------------|----------|
| PLEKHF2  | -0.334237809 | 0.014699 | -0.166855407  | 0.21677  | -0.308332169 | 0.023054 |
| TRMT112  | -0.234298242 | 0.014705 | -0.020743455  | 0.82687  | -0.078873293 | 0.405312 |
| RAP1GDS1 | -0.266286947 | 0.014717 | 0.018945255   | 0.86089  | -0.002110686 | 0.984393 |
| TTK      | -0.459881268 | 0.014737 | -0.023947538  | 0.89832  | 0.139794667  | 0.455226 |
| PLCB3    | 0.256965589  | 0.014779 | 0.145965974   | 0.16525  | -0.109198241 | 0.300508 |
| ZNF484   | -0.281250246 | 0.014782 | -0.14403866   | 0.20422  | -0.081899385 | 0.468661 |
| PTPN9    | 0.291997762  | 0.014794 | 0.284262169   | 0.01734  | 0.384652697  | 0.001239 |
| SUCLA2   | -0.329325669 | 0.014849 | -0.001177966  | 0.99299  | 0.1624303    | 0.224638 |
| OCLN     | -0.517063483 | 0.014857 | -0.3144446927 | 0.13791  | -0.179104394 | 0.397896 |
| CD93     | 1.242300226  | 0.014866 | 0.314804888   | 0.54428  | 0.754056299  | 0.141307 |
| BCAS1    | -0.575706883 | 0.014874 | -0.608449817  | 0.00997  | -0.538715364 | 0.022534 |
| CRBN     | -0.251633842 | 0.014894 | 0.027921776   | 0.78405  | -0.069189139 | 0.495846 |
| DOCK9    | 0.538876346  | 0.014895 | 0.080232941   | 0.71716  | 0.196082338  | 0.37537  |
| TIPIN    | -0.539559914 | 0.014893 | -0.305268411  | 0.16144  | -0.512451449 | 0.019475 |
| CETN3    | -0.415773326 | 0.014932 | -0.075301603  | 0.65448  | -0.173519628 | 0.30285  |
| CHRM2    | 0.642787063  | 0.014955 | 0.041362505   | 0.87565  | 0.603527191  | 0.022075 |
| MOSPD1   | -0.334535008 | 0.015013 | -0.079175164  | 0.55982  | -0.07102696  | 0.596956 |
| STAG1    | -0.293720793 | 0.015032 | 0.00215351    | 0.98572  | -0.086629807 | 0.471131 |
| ZNF469   | 1.276429407  | 0.015109 | 1.042980907   | 0.04718  | 0.305717288  | 0.563627 |
| POLR1D   | -0.311533473 | 0.015141 | -0.20113529   | 0.11579  | -0.197129769 | 0.122752 |
| GIT1     | 0.444865905  | 0.015154 | 0.113058703   | 0.53835  | 0.157762512  | 0.389886 |
| GAK      | 0.381744839  | 0.015162 | 0.073919664   | 0.63807  | 0.051482439  | 0.743293 |
| DUSP23   | -0.414044074 | 0.01517  | -0.125463397  | 0.43983  | -0.465697572 | 0.005292 |
| SLC7A9   | 1.750883899  | 0.015182 | 0.340174046   | 0.64156  | 0.231296239  | 0.752845 |
| GGT1     | 1.105391342  | 0.015187 | 0.390527476   | 0.39424  | 0.291162156  | 0.525627 |
| KIF11    | -0.396262138 | 0.015203 | -0.095896914  | 0.55556  | -0.030828553 | 0.849611 |
| VAT1L    | 1.436584294  | 0.015208 | 2.431566396   | 3.46E-05 | 0.523648506  | 0.38067  |
| MAP3K1   | 0.263046133  | 0.015214 | 0.443826532   | 3.93E-05 | 0.404515594  | 0.000179 |
| LETMD1   | -0.315734499 | 0.015221 | -0.328831836  | 0.01117  | -0.245665448 | 0.057396 |
| ANKRD27  | 0.404276483  | 0.01523  | 0.241715742   | 0.14553  | 0.252387803  | 0.12856  |
| KIAA0101 | -0.496125293 | 0.015233 | -0.34691376   | 0.08772  | -0.298299793 | 0.141854 |
| AJUBA    | 0.373030775  | 0.015248 | 0.121723003   | 0.42928  | 0.238505726  | 0.1202   |
| ASRGL1   | 0.565204119  | 0.015266 | 0.648800324   | 0.00513  | 0.893930918  | 0.000106 |
| FBXO16   | -0.751974116 | 0.015292 | -0.497670797  | 0.10234  | -0.447359207 | 0.143831 |
| FGD5     | 1.102212213  | 0.015298 | 1.147958652   | 0.01104  | -0.109871302 | 0.813925 |
| ORC6     | -0.381404206 | 0.015298 | -0.21166982   | 0.17527  | -0.182808584 | 0.241142 |
| COL4A5   | -0.459558406 | 0.015315 | -0.414392854  | 0.02868  | -0.166130191 | 0.380144 |
| PPP1R12B | 0.330448414  | 0.015333 | -0.068088221  | 0.61887  | 0.262637153  | 0.053628 |
| METTL17  | -0.228705311 | 0.015374 | -0.199033443  | 0.03329  | -0.094315861 | 0.30883  |
| BAMBI    | 0.6458795    | 0.015399 | 0.823389719   | 0.00194  | 0.288371804  | 0.279957 |
| GLRX2    | -0.427799412 | 0.015394 | 0.166427699   | 0.31403  | -0.150823745 | 0.370753 |
| SMIM12   | -0.272400263 | 0.015404 | -0.075716751  | 0.49703  | -0.084317222 | 0.447031 |
| ZNF83    | -0.236376773 | 0.015394 | -0.166391979  | 0.08628  | -0.022588618 | 0.814814 |
| WDR34    | -0.398996392 | 0.015423 | -0.19526945   | 0.23158  | -0.384808262 | 0.018831 |
| NIF3L1   | -0.273267283 | 0.015456 | -0.255067648  | 0.02191  | -0.19303519  | 0.081781 |
| PLRG1    | -0.220954282 | 0.015471 | -0.001243671  | 0.98903  | 0.107498877  | 0.232498 |
| MAF      | 0.659728181  | 0.015497 | 0.569864678   | 0.03647  | 0.269837494  | 0.322591 |



|          |              |          |              |          |              |          |
|----------|--------------|----------|--------------|----------|--------------|----------|
| SLC9A2   | -0.827902476 | 0.015504 | -0.465731362 | 0.17215  | -1.139134212 | 0.000866 |
| SGK2     | -0.427132644 | 0.015524 | -0.424831655 | 0.01553  | -0.46243248  | 0.008509 |
| RBM3     | -0.160142348 | 0.015534 | 0.236049255  | 0.00032  | 0.111003496  | 0.090638 |
| DNPB1    | -0.458442475 | 0.015545 | -0.2266046   | 0.22328  | -0.282201702 | 0.129169 |
| ANKRD50  | 0.355496863  | 0.015581 | 0.242553846  | 0.09865  | 0.417093775  | 0.004463 |
| ZDHHC5   | 0.27981902   | 0.015641 | 0.053755111  | 0.64198  | -0.015103726 | 0.896082 |
| SLC26A2  | 0.616751943  | 0.015662 | 0.526175591  | 0.03924  | -0.051912653 | 0.83908  |
| PPIP5K1  | 0.366349708  | 0.015678 | 0.302291455  | 0.04531  | 0.20332678   | 0.178246 |
| SPTBN1   | -0.190698717 | 0.015671 | -0.24855168  | 0.00163  | -0.166089265 | 0.035238 |
| TMSB4XP6 | 0.440932645  | 0.015678 | 0.749016821  | 3.94E-05 | 0.655557644  | 0.000321 |
| KDELR1   | 0.278324526  | 0.015697 | -0.145550724 | 0.20707  | -0.17947052  | 0.119599 |
| MAP7     | -0.433560387 | 0.015702 | -0.183592004 | 0.30469  | -0.116854411 | 0.513403 |
| SCN5A    | 1.387416961  | 0.015705 | 0.507882614  | 0.3824   | 1.107567766  | 0.052405 |
| ST3GAL2  | 0.491327659  | 0.015694 | 0.317034563  | 0.11888  | 0.040172804  | 0.843505 |
| PHC2     | 0.257593668  | 0.015742 | 0.065423858  | 0.53926  | 0.078858743  | 0.459083 |
| NDUFS1   | -0.181307945 | 0.015769 | 0.051209717  | 0.49339  | -0.044984058 | 0.547282 |
| PINLYP   | -0.708657092 | 0.015778 | -0.453181628 | 0.1201   | -0.589725501 | 0.042417 |
| CRTC1    | 0.489027458  | 0.015792 | -0.183269413 | 0.37531  | -0.070732607 | 0.730339 |
| SFXN2    | -0.533466409 | 0.015805 | -0.262595332 | 0.23341  | -0.243041127 | 0.269545 |
| USP32    | 0.249639354  | 0.015803 | 0.030736551  | 0.76613  | 0.192538999  | 0.061619 |
| SFMBT1   | -0.353853737 | 0.015815 | -0.016475526 | 0.90876  | -0.213231289 | 0.139766 |
| DCUN1D4  | -0.297527599 | 0.015834 | -0.176637882 | 0.15019  | -0.130465424 | 0.287032 |
| ZNF584   | 0.378411218  | 0.015847 | 0.184943044  | 0.23834  | 0.065419281  | 0.675979 |
| TMEM237  | -0.552900431 | 0.015913 | 0.050880578  | 0.82312  | 0.088780015  | 0.696223 |
| CLEC2D   | 0.618034393  | 0.015941 | 0.571687028  | 0.02544  | 0.779104421  | 0.002232 |
| INTS3    | 0.222847853  | 0.015942 | 0.13609779   | 0.14027  | 0.160032366  | 0.082608 |
| RELB     | 1.516312541  | 0.015949 | 0.743029272  | 0.24154  | 0.716683533  | 0.257571 |
| NIPIB3   | 0.567689904  | 0.015963 | -0.2109136   | 0.37674  | 0.195981714  | 0.406744 |
| RIPK2    | 0.500306999  | 0.015975 | 0.113466144  | 0.58569  | 0.636056495  | 0.002085 |
| SLC25A38 | -0.269037418 | 0.016005 | -0.187985309 | 0.08833  | -0.197719187 | 0.072202 |
| SPINK5   | -0.447140282 | 0.016008 | -0.068964421 | 0.70781  | -0.50899557  | 0.00585  |
| SUSD1    | -0.273959043 | 0.016012 | -0.159074717 | 0.15912  | -0.129375892 | 0.251439 |
| GSAP     | -0.407550396 | 0.016028 | -0.163329921 | 0.32662  | -0.217984792 | 0.19009  |
| TSR2     | -0.249821602 | 0.016055 | -0.111091709 | 0.27457  | -0.259567067 | 0.011111 |
| SMPDL3B  | -0.750318557 | 0.016066 | -0.165812932 | 0.58794  | -1.043368087 | 0.000846 |
| TMEM229B | -0.616150767 | 0.016069 | -0.256804063 | 0.30789  | -0.627776505 | 0.013299 |
| FASTKD1  | -0.345021417 | 0.016085 | -0.042107521 | 0.76592  | -0.017525669 | 0.901112 |
| HCFC1    | 0.455057083  | 0.016083 | -0.253864936 | 0.18008  | -0.002716801 | 0.988557 |
| ATP5EP2  | -3.361576141 | 0.016109 | -1.347319994 | 0.32375  | -2.251189029 | 0.100964 |
| SDSL     | -0.703178656 | 0.016106 | -0.067677391 | 0.80162  | -0.425222355 | 0.124571 |
| NAT14    | -0.381743945 | 0.016167 | -0.172518967 | 0.26487  | -0.37259532  | 0.017259 |
| PCNX     | 0.342522741  | 0.016194 | 0.206895943  | 0.14596  | 0.266908109  | 0.060637 |
| TPK1     | 0.526506417  | 0.016195 | 0.310296759  | 0.15484  | 0.470166123  | 0.031021 |
| CREB3L3  | 0.991086157  | 0.016253 | 0.418000822  | 0.31142  | 1.06948172   | 0.009444 |
| EFNB2    | 0.275779421  | 0.016248 | 0.448013567  | 8.89E-05 | 0.222724829  | 0.051777 |
| IDH3G    | 0.255399154  | 0.016249 | 0.12916544   | 0.2234   | 0.31404922   | 0.002942 |
| ITGB3    | 0.792748272  | 0.016243 | 0.647301903  | 0.04945  | 0.204592851  | 0.538642 |

|              |              |          |              |          |              |          |
|--------------|--------------|----------|--------------|----------|--------------|----------|
| SELM         | 2.462263926  | 0.0163   | 1.878376914  | 0.06692  | 1.980684288  | 0.053445 |
| KANSL3       | 0.275566735  | 0.016323 | 0.012780368  | 0.91125  | 0.160976618  | 0.159274 |
| FBXL12       | 0.211013951  | 0.016332 | -0.058654761 | 0.50669  | 0.107399996  | 0.217046 |
| SEC24C       | 0.225255079  | 0.016372 | 0.167451388  | 0.07386  | 0.21954381   | 0.018976 |
| KLC1         | 0.317692564  | 0.016397 | 0.021533543  | 0.87071  | 0.322765363  | 0.01447  |
| RP1-20N2.6   | -0.64032738  | 0.016399 | -0.262934836 | 0.31023  | -0.453867234 | 0.080971 |
| TIMM8A       | -0.4248065   | 0.016405 | -0.052481692 | 0.75691  | -0.226282572 | 0.185197 |
| CDK16        | 0.215710772  | 0.016495 | 0.028959612  | 0.74753  | 0.126009068  | 0.160371 |
| EIF1AD       | 0.256775663  | 0.016499 | 0.08803517   | 0.41249  | 0.085494988  | 0.42252  |
| TMEM9B       | -0.247509217 | 0.016493 | 0.03677477   | 0.7166   | -0.120954875 | 0.234191 |
| MPP5         | -0.197815812 | 0.016514 | -0.189690658 | 0.02005  | -0.06157682  | 0.446444 |
| TIMM21       | -0.315054968 | 0.016533 | 0.044768191  | 0.72887  | -0.126997278 | 0.327928 |
| FGD4         | -0.404738084 | 0.016561 | -0.199583964 | 0.23625  | -0.331987909 | 0.048902 |
| MFSD2B       | -1.06314509  | 0.016556 | 0.138928193  | 0.74205  | -0.478855364 | 0.263323 |
| CAB39        | 0.247232884  | 0.016569 | 0.182479446  | 0.07648  | 0.228070274  | 0.026614 |
| SERBP1       | -0.269376807 | 0.01662  | -0.201244207 | 0.07338  | -0.111635792 | 0.320538 |
| EFCAB2       | -0.408630465 | 0.016628 | -0.200672068 | 0.23293  | -0.04985385  | 0.764871 |
| MELK         | -0.510242946 | 0.016669 | -0.185541477 | 0.38128  | -0.090803812 | 0.668047 |
| MANBAL       | -0.249088662 | 0.016675 | -0.142254513 | 0.15954  | -0.03497412  | 0.726542 |
| ABRACL       | -0.303406782 | 0.016684 | -0.096271886 | 0.44009  | -0.152448384 | 0.221471 |
| ASAP1        | 0.463448085  | 0.016722 | 0.089592737  | 0.64436  | 0.219962471  | 0.255944 |
| FAM107B      | -0.412019879 | 0.016714 | -0.113692453 | 0.50801  | -0.224469559 | 0.191492 |
| KIF1C        | 0.239633498  | 0.016722 | 0.256993522  | 0.01021  | 0.178523312  | 0.074317 |
| SNX6         | -0.164389148 | 0.016732 | -0.038309459 | 0.57385  | 0.01055241   | 0.876547 |
| ULBP3        | -0.593873067 | 0.016735 | -0.532334951 | 0.02987  | -0.894763061 | 0.00033  |
| CDH11        | 0.518017625  | 0.016756 | 0.38687451   | 0.074    | 0.405594763  | 0.061047 |
| MBD1         | 0.232208465  | 0.016759 | 0.092476605  | 0.33947  | -0.001507975 | 0.987571 |
| SERPINA3     | 1.324695367  | 0.016757 | 2.335445081  | 2.47E-05 | 1.559935595  | 0.004849 |
| EMP2         | 0.536783457  | 0.016788 | 0.368345123  | 0.1005   | 0.254086973  | 0.257302 |
| RBM43        | -0.488493014 | 0.016795 | -0.117800334 | 0.55328  | -0.15693323  | 0.431302 |
| TMEM198B     | 0.401258913  | 0.016833 | 0.090496742  | 0.59046  | 0.025030867  | 0.881776 |
| RAP1A        | -0.360350993 | 0.016855 | 0.034081601  | 0.81979  | -0.163791953 | 0.274256 |
| BAG2         | -0.496752977 | 0.016879 | -0.160323231 | 0.43634  | -0.431846014 | 0.036688 |
| TAB2         | 0.261131307  | 0.016875 | 0.125609781  | 0.25003  | 0.157071429  | 0.150302 |
| ABI3         | 1.217758773  | 0.016884 | 0.055854506  | 0.9177   | 1.210058375  | 0.016476 |
| FOXC1        | 1.739331515  | 0.016907 | 1.677388417  | 0.02119  | 0.611108644  | 0.403126 |
| AFAP1L1      | 0.956799845  | 0.016965 | 0.765604373  | 0.05567  | 0.798948262  | 0.043818 |
| IP6K1        | 0.412366305  | 0.016974 | 0.32403943   | 0.05914  | 0.43836269   | 0.010693 |
| TMEM106C     | -0.422600196 | 0.016982 | -0.310962689 | 0.07765  | -0.277020164 | 0.116216 |
| MAP1B        | 0.803471488  | 0.016999 | 0.698009121  | 0.03812  | 0.382863598  | 0.255504 |
| GOLM1        | -0.443057083 | 0.017016 | -0.24855671  | 0.18055  | -0.065623223 | 0.723659 |
| RIC3         | -1.987858705 | 0.017014 | 0.001368485  | 0.99867  | -2.337868615 | 0.004845 |
| BRWD1        | -0.203430668 | 0.017048 | 0.046126896  | 0.58706  | -0.056108397 | 0.508482 |
| TMEM66       | -0.185563195 | 0.017049 | 0.058733817  | 0.44652  | -0.085254064 | 0.270163 |
| PIP11-213G2. | -0.599921848 | 0.017055 | -0.311618506 | 0.19892  | -0.153340431 | 0.52141  |
| PIGX         | -0.264872739 | 0.017062 | -0.075485328 | 0.49076  | -0.178059915 | 0.103867 |
| PIGB         | -0.298939256 | 0.017069 | -0.413254301 | 0.00083  | -0.353924217 | 0.00392  |

|            |              |          |              |         |              |          |
|------------|--------------|----------|--------------|---------|--------------|----------|
| ABCB8      | 0.34107741   | 0.017117 | 0.053917326  | 0.70597 | -0.241491929 | 0.09264  |
| BCL2A1     | 2.155187858  | 0.017107 | 2.13826995   | 0.01782 | 2.078382581  | 0.021436 |
| DDR2       | 0.604565283  | 0.017115 | 0.287909247  | 0.25625 | 0.376795848  | 0.137202 |
| RASGEF1A   | 1.404692228  | 0.017116 | 1.016113578  | 0.07602 | 1.222152069  | 0.03338  |
| ZSWIM7     | -0.354507843 | 0.01713  | -0.105429256 | 0.47136 | -0.206381091 | 0.157043 |
| CEP170B    | 0.406279666  | 0.017147 | 0.011210486  | 0.94764 | -0.160854015 | 0.346719 |
| TMEM117    | -0.390671618 | 0.017147 | -0.243652234 | 0.13329 | -0.18660514  | 0.248441 |
| RPL10      | -0.248657433 | 0.017158 | -0.369797754 | 0.00039 | -0.226958532 | 0.029534 |
| P11-231C14 | 0.859527475  | 0.01717  | 0.338231731  | 0.35094 | 1.082118657  | 0.002546 |
| TGM1       | 1.548584274  | 0.017166 | -0.459486892 | 0.4856  | 0.229199277  | 0.727611 |
| PITX2      | 1.012607386  | 0.017214 | 0.245387417  | 0.56538 | -1.063626707 | 0.014048 |
| ATP1A1     | 0.304492688  | 0.017257 | 0.307883918  | 0.01603 | 0.191751728  | 0.133682 |
| HSBP1      | -0.187112959 | 0.017313 | -0.008145798 | 0.91692 | -0.022975515 | 0.768184 |
| IFT43      | -0.403338623 | 0.017309 | 0.015391097  | 0.92457 | 0.002621569  | 0.987101 |
| SEMA4C     | 0.36340476   | 0.017329 | 0.19230763   | 0.20796 | 0.24807148   | 0.103992 |
| UBE2Q2     | -0.311637969 | 0.017328 | -0.101817642 | 0.43202 | -0.071529038 | 0.58149  |
| ABHD6      | -0.43873384  | 0.017349 | -0.363372478 | 0.04647 | -0.41624705  | 0.022813 |
| C4orf3     | -0.233858123 | 0.017357 | -0.225317142 | 0.02169 | -0.208588334 | 0.033386 |
| ATP6V1A    | -0.336238131 | 0.017373 | -0.176684994 | 0.21026 | -0.033838684 | 0.810335 |
| DES11      | 0.442458941  | 0.017398 | 0.285715752  | 0.12449 | 0.552842985  | 0.002913 |
| DZIP3      | -0.240523213 | 0.017432 | 0.219674743  | 0.02687 | -0.044333348 | 0.656404 |
| FH         | -0.331625188 | 0.017436 | -0.08004664  | 0.5642  | -0.095728248 | 0.490385 |
| HSD17B8    | -0.433723893 | 0.017454 | -0.385158489 | 0.03148 | -0.350524285 | 0.048611 |
| AC091654.7 | -1.344087168 | 0.017468 | -0.330636362 | 0.50848 | -0.48007143  | 0.340292 |
| WDR12      | -0.447737674 | 0.017465 | -0.252852909 | 0.17843 | -0.267800074 | 0.153822 |
| ANKFN1     | -2.015961632 | 0.017479 | 0.047416004  | 0.95094 | -1.146398256 | 0.155861 |
| BEX5       | -0.902220844 | 0.017479 | -0.189202185 | 0.59046 | -0.532737488 | 0.137802 |
| ABCC1      | 0.518054929  | 0.017519 | 0.25858567   | 0.23567 | 0.025893484  | 0.90549  |
| ANKRD32    | -0.501875689 | 0.017526 | -0.125903171 | 0.54628 | -0.306914018 | 0.140994 |
| ETV6       | 0.364392214  | 0.017588 | 0.153148124  | 0.31859 | 0.160150706  | 0.296592 |
| TAF10      | 0.328805275  | 0.017601 | 0.139121269  | 0.31507 | 0.305094943  | 0.026935 |
| PITPNM1    | 0.421235702  | 0.01761  | -0.179946163 | 0.31172 | 0.049213028  | 0.782354 |
| MFAP4      | 0.504420597  | 0.017632 | -0.121064313 | 0.56961 | 0.065149217  | 0.759385 |
| CYP20A1    | -0.526036061 | 0.017643 | -0.117186441 | 0.58772 | -0.121209701 | 0.57595  |
| SAMD4B     | 0.388180825  | 0.017649 | -0.232595717 | 0.16391 | -0.010469155 | 0.949442 |
| ZMAT2      | -0.265173828 | 0.01765  | -0.146107999 | 0.18796 | 0.021707475  | 0.84434  |
| CTDNBP1    | 0.494614457  | 0.017659 | 0.003949023  | 0.98494 | 0.218217649  | 0.295298 |
| CA2        | -0.613666001 | 0.017675 | -0.53907004  | 0.03705 | -0.688121691 | 0.007786 |
| SIPA1      | 0.566288293  | 0.017697 | 0.330775924  | 0.17123 | 0.132645171  | 0.580032 |
| TNFRSF13C  | 0.807607767  | 0.017697 | 0.262917988  | 0.45087 | 0.636206041  | 0.060744 |
| CLIP2      | 0.412199723  | 0.017705 | -0.045207355 | 0.79491 | 0.150204266  | 0.387511 |
| ANKRD36    | -0.370798223 | 0.017728 | -0.350977245 | 0.02435 | -0.217070005 | 0.163675 |
| CCNA2      | -0.412011989 | 0.017766 | -0.073499245 | 0.67009 | 0.086706606  | 0.614441 |
| VIM        | 0.472089367  | 0.017797 | 0.210218434  | 0.29133 | 0.260467896  | 0.191034 |
| RNF44      | 0.355278985  | 0.017808 | -0.139731972 | 0.35818 | -0.310122435 | 0.041177 |
| AC004951.5 | 1.308629242  | 0.017822 | 0.579562508  | 0.30252 | 0.313304224  | 0.580504 |
| FOXD2      | 1.467922667  | 0.017845 | 1.518354119  | 0.01413 | -0.989895683 | 0.122624 |

|            |              |          |              |          |              |          |
|------------|--------------|----------|--------------|----------|--------------|----------|
| 6-Mar      | -0.232856495 | 0.017861 | -0.141543226 | 0.14895  | -0.093304539 | 0.34094  |
| COLEC11    | 1.354212583  | 0.017871 | 0.973870008  | 0.08881  | 0.804802824  | 0.160304 |
| ASB2       | 1.023784772  | 0.01791  | -0.569530284 | 0.20684  | 0.603701939  | 0.166308 |
| TNFRSF14   | 1.057596906  | 0.017954 | 1.178669797  | 0.00742  | 0.874754743  | 0.054496 |
| BRD3       | 0.361124503  | 0.017978 | -0.029712589 | 0.84585  | -0.067528193 | 0.65863  |
| PIGM       | -0.339016188 | 0.017972 | -0.164797743 | 0.24439  | -0.263249573 | 0.063311 |
| SAMD1      | 0.300953846  | 0.017975 | 0.094230585  | 0.45906  | 0.086854495  | 0.494546 |
| SYT2       | 0.871230133  | 0.017967 | 0.01791721   | 0.96214  | 0.887694292  | 0.015187 |
| PLXNA1     | 0.355578269  | 0.018006 | -0.059758069 | 0.69146  | 0.057367822  | 0.703104 |
| IFI27L2    | -0.397169125 | 0.018071 | -0.135710202 | 0.40056  | -0.543006889 | 0.001094 |
| LAMP1      | -0.27652101  | 0.018072 | 0.066525279  | 0.5679   | -0.285939541 | 0.014357 |
| SEC11A     | -0.268290668 | 0.018068 | 0.040698874  | 0.71879  | 0.009922808  | 0.930046 |
| YJEFN3     | 0.559345712  | 0.018075 | 0.141831053  | 0.55653  | 0.304238191  | 0.198866 |
| EPHA4      | 0.745335481  | 0.018088 | 0.393548054  | 0.21184  | 0.244078869  | 0.438808 |
| LONP2      | -0.196393087 | 0.01809  | -0.095703627 | 0.24828  | -0.160771145 | 0.052234 |
| AP000347.2 | 0.426418692  | 0.0181   | 0.266364452  | 0.13604  | 0.357855507  | 0.044929 |
| SIRT7      | 0.387402191  | 0.01816  | 0.36088062   | 0.0269   | 0.399859866  | 0.014146 |
| CROT       | -0.541393414 | 0.018172 | -0.21782927  | 0.33737  | -0.243704664 | 0.2844   |
| CHSY1      | 0.398491005  | 0.018196 | 0.508744986  | 0.00253  | 0.280243171  | 0.096622 |
| DCLK1      | 0.999933061  | 0.018191 | 1.725212755  | 3.73E-05 | 0.779765078  | 0.064286 |
| PGS1       | 0.290148859  | 0.018207 | 0.031628374  | 0.79776  | 0.220081812  | 0.071425 |
| SIPA1L3    | 0.56619239   | 0.018211 | 0.594327278  | 0.0132   | 0.33859236   | 0.158286 |
| SLC26A10   | 1.333582802  | 0.018213 | 0.912704288  | 0.11174  | 0.987641482  | 0.083396 |
| STAC3      | 1.267947066  | 0.018204 | 1.353538369  | 0.01007  | 0.887362041  | 0.095552 |
| FOXI3      | 1.471723371  | 0.018295 | 1.097948759  | 0.08013  | 0.467903378  | 0.465976 |
| NAE1       | -0.236236647 | 0.018317 | -0.101145986 | 0.30749  | -0.001412598 | 0.988592 |
| FDPS       | 0.407584719  | 0.018348 | 0.229144635  | 0.18484  | 0.433626733  | 0.012069 |
| IRS2       | 0.596179256  | 0.018345 | 0.195625488  | 0.44252  | 0.392832863  | 0.119743 |
| GCFC2      | -0.418362977 | 0.018382 | -0.22123774  | 0.21022  | -0.193945184 | 0.271968 |
| MRPL35     | -0.267298815 | 0.018407 | 0.024514986  | 0.8266   | -0.012216771 | 0.913126 |
| FAM72B     | -1.056247391 | 0.018469 | 0.278270408  | 0.51373  | 0.295977352  | 0.48218  |
| PRRC1      | 0.232714145  | 0.018472 | 0.089999397  | 0.36078  | 0.028454975  | 0.772534 |
| CXCR4      | -0.854778072 | 0.018484 | -0.861599497 | 0.0175   | -0.987722021 | 0.006467 |
| CA5BP1     | 0.462560842  | 0.018526 | 0.288049189  | 0.14338  | 0.380765029  | 0.051138 |
| GCLC       | -0.532500186 | 0.018515 | -0.516144715 | 0.02201  | -0.455774194 | 0.042965 |
| TOPBP1     | -0.361857495 | 0.018523 | -0.153244308 | 0.31759  | -0.002686118 | 0.986014 |
| DUSP9      | -0.895839017 | 0.018568 | -1.101849304 | 0.00383  | -0.829824574 | 0.028038 |
| ZUFSP      | -0.318380801 | 0.018577 | -0.106417382 | 0.42476  | 0.117818265  | 0.372933 |
| COG5       | -0.268596889 | 0.018593 | -0.085917468 | 0.44934  | -0.117061096 | 0.302655 |
| FUT10      | -0.341253686 | 0.018601 | -0.1613771   | 0.26128  | -0.195132486 | 0.174325 |
| LARP6      | 0.560324709  | 0.018599 | 0.704283358  | 0.00299  | 0.38990053   | 0.100635 |
| ROR2       | 0.469185204  | 0.018628 | 0.371676831  | 0.06228  | 0.073278226  | 0.713478 |
| TIMMDC1    | -0.256915559 | 0.018644 | 0.042572089  | 0.69048  | 0.095192275  | 0.372664 |
| TMEM30A    | 0.292091221  | 0.01864  | 0.590315699  | 1.94E-06 | 0.242541997  | 0.050592 |
| WDR75      | -0.20974702  | 0.018638 | -0.005136871 | 0.95344  | 0.033323004  | 0.704362 |
| WDR46      | -0.347872801 | 0.018686 | 0.005726914  | 0.96883  | -0.005482742 | 0.970179 |
| MMP7       | 1.635223234  | 0.018734 | 2.789988955  | 6.00E-05 | 1.347584135  | 0.052718 |

|           |              |          |              |         |              |          |
|-----------|--------------|----------|--------------|---------|--------------|----------|
| TM7SF3    | -0.481463866 | 0.018757 | -0.194448492 | 0.34105 | -0.509633374 | 0.012661 |
| RNF126    | 0.368906741  | 0.018766 | 0.097793632  | 0.53452 | -0.286640931 | 0.071397 |
| OR7E12P   | -1.369217164 | 0.018803 | -0.512746298 | 0.33882 | -1.962938006 | 0.00122  |
| ZC3H3     | 0.423958353  | 0.018817 | -0.080717066 | 0.66178 | 0.051426889  | 0.777876 |
| ZNF134    | 0.317215796  | 0.018812 | 0.283236391  | 0.03496 | 0.313987282  | 0.019429 |
| ASNSD1    | -0.380040701 | 0.018851 | 0.11270748   | 0.4834  | 0.125421509  | 0.434855 |
| NAGA      | -0.215246238 | 0.01886  | -0.098627681 | 0.27241 | -0.320523251 | 0.000404 |
| OXGR1     | 2.907784207  | 0.01885  | 2.356058806  | 0.05806 | -0.452416756 | 0.722427 |
| SYMPK     | 0.337938262  | 0.018856 | 0.300651866  | 0.03662 | 0.466394141  | 0.001147 |
| CD101     | 0.993952841  | 0.018872 | 0.604908195  | 0.15215 | 0.369913002  | 0.382279 |
| UQCRB     | -0.313440113 | 0.018898 | -0.02720894  | 0.83811 | -0.097015784 | 0.466315 |
| SLC9A4    | -0.811699148 | 0.018985 | -0.262086454 | 0.4477  | -0.894511058 | 0.00971  |
| ASIC3     | 1.229182134  | 0.019028 | 0.652632423  | 0.22316 | 0.127237295  | 0.820431 |
| RPS20P22  | 1.034880045  | 0.019037 | 0.522553693  | 0.24246 | 0.549689827  | 0.220905 |
| TCEA1P2   | -0.427398036 | 0.019086 | -0.224344273 | 0.21313 | -0.166370608 | 0.354474 |
| BGN       | 0.761112906  | 0.019112 | 0.473355012  | 0.14523 | -0.369593855 | 0.258453 |
| CCT2      | -0.233265541 | 0.019109 | -0.066402248 | 0.50353 | 0.115636482  | 0.243326 |
| PDE6B     | -0.653711296 | 0.019101 | -0.28687391  | 0.29772 | -0.509519157 | 0.065752 |
| PSMC1     | -0.425612123 | 0.019099 | -0.056686314 | 0.75385 | -0.093461585 | 0.604925 |
| ZNF652    | 0.294518654  | 0.019138 | 0.012743941  | 0.91932 | 0.100037243  | 0.425924 |
| PHGR1     | 1.596933281  | 0.01916  | 0.756254742  | 0.2699  | -0.10813594  | 0.876047 |
| SNRPGP15  | 1.334530899  | 0.019149 | 0.330465132  | 0.56516 | 0.930870158  | 0.102718 |
| SPAG9     | 0.324337317  | 0.019156 | 0.234461534  | 0.08972 | 0.370355216  | 0.007365 |
| AARS2     | -0.227519764 | 0.019205 | -0.036217868 | 0.70263 | -0.18588857  | 0.051032 |
| CLCN4     | -0.630928615 | 0.0192   | -0.260145042 | 0.32913 | -0.116860114 | 0.658294 |
| EFCAB11   | -0.406940339 | 0.019206 | 0.007831634  | 0.96339 | -0.263946715 | 0.122332 |
| ZNF596    | 0.638458946  | 0.019206 | 0.484466192  | 0.07309 | 0.547661315  | 0.041277 |
| FHOD1     | 0.39987823   | 0.019221 | 0.078563583  | 0.6458  | 0.254805484  | 0.135982 |
| FHL2      | 0.482567756  | 0.019242 | 0.079586023  | 0.69974 | 0.426557795  | 0.038344 |
| IGF2BP1   | 0.318594907  | 0.019238 | -0.050474908 | 0.71092 | 0.065119734  | 0.632049 |
| RNF19B    | 0.367928391  | 0.019277 | 0.481714178  | 0.002   | 0.19117179   | 0.222768 |
| ASGR1     | 0.910312374  | 0.019322 | 0.356217895  | 0.36519 | 0.567915889  | 0.147102 |
| JPH2      | 0.881329053  | 0.019331 | -0.5032367   | 0.21404 | 0.48279281   | 0.203602 |
| PCTP      | -0.325679218 | 0.019352 | -0.20856483  | 0.13123 | -0.260031023 | 0.060028 |
| SPG7      | -0.252922715 | 0.019366 | -0.093631963 | 0.38419 | -0.133087044 | 0.216063 |
| CRHR1-IT1 | 0.280935578  | 0.019399 | -0.098629425 | 0.41176 | 0.149090199  | 0.212521 |
| RMND1     | -0.331220281 | 0.019437 | -0.043685534 | 0.75275 | -0.16539757  | 0.233776 |
| BLCAP     | 0.342888759  | 0.019451 | 0.041201817  | 0.77938 | -0.042920437 | 0.770653 |
| GDA       | 1.03697183   | 0.019477 | 0.426209057  | 0.33765 | 0.888078365  | 0.04535  |
| H3F3AP4   | 1.225456357  | 0.019501 | 0.606784883  | 0.24768 | 0.541954913  | 0.301852 |
| PPP1R3C   | -0.846338063 | 0.019517 | -0.797595793 | 0.02753 | -1.274997717 | 0.000441 |
| ARSK      | -0.413081105 | 0.019563 | -0.427774114 | 0.01481 | -0.45471127  | 0.009532 |
| KCTD11    | 0.502311929  | 0.01956  | 0.457591961  | 0.03318 | 0.119533062  | 0.579078 |
| FAM127C   | 0.380924392  | 0.019596 | -0.136986566 | 0.41001 | 0.02291307   | 0.889036 |
| MSH3      | -0.266555092 | 0.019593 | -0.101414999 | 0.36808 | -0.144143365 | 0.200209 |
| PRDM5     | -0.438710058 | 0.019599 | -0.07435434  | 0.68786 | -0.219134866 | 0.237641 |
| PPIL4     | -0.192801359 | 0.019622 | -0.108819119 | 0.1822  | 0.035410691  | 0.662149 |

|           |              |          |              |         |              |          |
|-----------|--------------|----------|--------------|---------|--------------|----------|
| SLC35E1   | 0.292637579  | 0.019617 | 0.193850788  | 0.12169 | 0.125988089  | 0.314973 |
| TNC       | 1.069763326  | 0.019628 | 1.395884819  | 0.00233 | 0.478910208  | 0.296231 |
| SLC26A9   | -0.630448405 | 0.019667 | -0.581483671 | 0.0314  | -0.779931807 | 0.003923 |
| TTI2      | -0.504409209 | 0.019674 | 0.483588057  | 0.02374 | -0.103828724 | 0.628661 |
| SH3GLB1   | 0.213145773  | 0.019691 | 0.334672918  | 0.00024 | 0.200244856  | 0.027937 |
| TP53BP2   | 0.345083207  | 0.019719 | 0.102290127  | 0.48941 | 0.375447989  | 0.010994 |
| C15orf62  | 0.672487482  | 0.019746 | -0.041262439 | 0.88986 | -0.205820322 | 0.492894 |
| C16orf89  | -0.896894728 | 0.019747 | 0.169102542  | 0.64556 | -1.001648446 | 0.01278  |
| MTSS1     | 0.570439621  | 0.019756 | 0.615895855  | 0.01132 | -0.145854485 | 0.554542 |
| RAB11FIP3 | 0.548105806  | 0.01976  | -0.045681817 | 0.84682 | 0.183897144  | 0.435152 |
| NARFL     | 0.376273345  | 0.019767 | 0.172437068  | 0.28308 | 0.221271224  | 0.168318 |
| HADHA     | -0.185459444 | 0.019809 | -0.190437852 | 0.01649 | -0.105184916 | 0.18469  |
| FAM129A   | -0.667112763 | 0.019824 | -0.086153852 | 0.76161 | -0.958800203 | 0.000855 |
| SMG1      | 0.337346614  | 0.019829 | 0.14167096   | 0.32783 | 0.249214236  | 0.085091 |
| GALE      | -0.315052814 | 0.019838 | -0.19866346  | 0.14009 | -0.491262436 | 0.00028  |
| EGR3      | 1.24318274   | 0.019865 | 0.925699069  | 0.08394 | 0.487710382  | 0.366552 |
| GPR125    | -0.277516955 | 0.019866 | -0.19872191  | 0.09466 | -0.020002631 | 0.86629  |
| MAP3K13   | -0.223795718 | 0.019849 | 0.074937982  | 0.43179 | -0.022025896 | 0.81715  |
| NGDN      | -0.255106473 | 0.019856 | -0.024278032 | 0.82084 | 0.029808284  | 0.779441 |
| CDKAL1    | -0.208361375 | 0.019905 | -0.254117048 | 0.00417 | -0.164263541 | 0.063207 |
| CLIC5     | 1.384897897  | 0.019925 | 0.370383473  | 0.53433 | 1.392945919  | 0.019197 |
| CDH12     | -0.901652794 | 0.01995  | 0.158662742  | 0.67923 | -0.7728851   | 0.044936 |
| CROCC     | 0.4585893    | 0.019946 | 0.024933519  | 0.89965 | -0.100344269 | 0.61198  |
| KIAA0391  | 0.291397307  | 0.019951 | 0.349119419  | 0.00511 | 0.277665751  | 0.02578  |
| SDC1      | -0.504392729 | 0.019956 | -0.589209932 | 0.00652 | -0.93980309  | 1.47E-05 |
| VWA9      | -0.186052279 | 0.01997  | -0.002738841 | 0.97229 | 0.022306108  | 0.776719 |
| STAG3L3   | 0.293595682  | 0.019989 | 0.049292954  | 0.69706 | 0.173251939  | 0.169471 |
| SLC5A3    | 0.315598131  | 0.020015 | 0.384419211  | 0.00457 | 0.013987635  | 0.917909 |
| ATXN1L    | 0.194546342  | 0.020023 | 0.011269681  | 0.89325 | 0.178394131  | 0.032631 |
| FLAD1     | -0.341876137 | 0.020038 | -0.078928169 | 0.58722 | -0.207464475 | 0.153459 |
| TMEM60    | -0.375210778 | 0.02004  | -0.183737257 | 0.24164 | -0.003282026 | 0.983052 |
| SAYSD1    | -0.300150402 | 0.020076 | -0.136830877 | 0.27658 | -0.271665136 | 0.031661 |
| CD9       | 0.632162122  | 0.020082 | 0.493579694  | 0.06941 | 0.132325066  | 0.626968 |
| CLDN23    | -0.620600538 | 0.020112 | -0.3948026   | 0.13123 | -0.683727648 | 0.009745 |
| SOX21     | -0.839555348 | 0.020149 | -0.418358737 | 0.24394 | -1.104168792 | 0.002251 |
| SELENBP1  | -0.340423791 | 0.020185 | -0.451903498 | 0.00201 | -0.245979535 | 0.090023 |
| ATG4D     | 0.423403185  | 0.020229 | 0.220411386  | 0.22372 | 0.25397103   | 0.159781 |
| EXD2      | -0.235442288 | 0.020227 | -0.18399058  | 0.06555 | -0.272742541 | 0.006313 |
| SMOC2     | 0.577680227  | 0.020295 | -0.051708072 | 0.83577 | 0.70928342   | 0.004318 |
| TTC17     | -0.225351392 | 0.020305 | -0.132153815 | 0.17207 | -0.126208473 | 0.191804 |
| MAST3     | 0.6262001    | 0.020322 | 0.209929968  | 0.43767 | 0.133948745  | 0.621494 |
| MANF      | -0.392339774 | 0.020342 | -0.136402253 | 0.41739 | -0.125701794 | 0.454552 |
| UBE2G2    | 0.212980083  | 0.020375 | 0.083608733  | 0.36014 | -0.024577563 | 0.787731 |
| NSUN3     | -0.369776835 | 0.020398 | -0.162011744 | 0.30357 | -0.234822154 | 0.134797 |
| NOMO3     | 0.825273764  | 0.020481 | 0.333229631  | 0.35011 | 0.933266533  | 0.008609 |
| RTF1      | 0.209353049  | 0.02049  | -0.054967228 | 0.54313 | 0.089799732  | 0.318399 |
| NUDT12    | -0.281709095 | 0.020532 | -0.152945623 | 0.20258 | -0.218873488 | 0.068161 |

|           |              |          |              |         |              |          |
|-----------|--------------|----------|--------------|---------|--------------|----------|
| EPAS1     | 0.456804054  | 0.020554 | 0.230917211  | 0.24163 | 0.499282536  | 0.011302 |
| HIST1H1C  | -0.415465375 | 0.020543 | -0.201157193 | 0.26172 | 0.036879924  | 0.836904 |
| QRICH1    | 0.168646195  | 0.020555 | 0.087883434  | 0.22662 | 0.164948738  | 0.022552 |
| C14orf178 | 1.22187642   | 0.02057  | 0.006312099  | 0.99115 | 0.145079514  | 0.793393 |
| FNIP2     | -0.340441003 | 0.020598 | -0.24190242  | 0.09949 | -0.225394486 | 0.124708 |
| RBL2      | -0.182365527 | 0.02062  | -0.117048773 | 0.13472 | -0.140491983 | 0.072331 |
| RRAS      | 0.478821911  | 0.020641 | 0.153033518  | 0.46079 | 0.171581649  | 0.407529 |
| AKT1      | 0.243326457  | 0.020672 | -0.118299285 | 0.26055 | 0.039518217  | 0.706858 |
| TNKS1BP1  | 0.376328156  | 0.020689 | 0.479433969  | 0.00318 | 0.312217275  | 0.054898 |
| CCDC147   | -1.026198842 | 0.020718 | -1.034219086 | 0.01746 | -0.694777079 | 0.096492 |
| RIOK1     | -0.391720676 | 0.020743 | -0.069843625 | 0.6771  | 0.100302048  | 0.548681 |
| ACER1     | 1.296383872  | 0.020802 | 1.449467419  | 0.00866 | 0.865925571  | 0.126632 |
| EMC3      | -0.225184764 | 0.020792 | -0.162075525 | 0.09281 | -0.057255183 | 0.551941 |
| ESF1      | -0.350303598 | 0.0208   | -0.280849178 | 0.06217 | -0.07012697  | 0.639585 |
| MRPS36    | -0.417568903 | 0.0208   | -0.189371788 | 0.28723 | -0.074955259 | 0.673148 |
| ERF       | 0.379001108  | 0.020814 | 0.222458092  | 0.17597 | -0.004441411 | 0.978472 |
| TONSL     | -0.410018516 | 0.020822 | -0.470047893 | 0.00787 | -0.708719566 | 6.55E-05 |
| CCND3     | 0.410232618  | 0.020878 | 0.10472468   | 0.5556  | 0.023837108  | 0.89325  |
| AMICA1    | -0.726860606 | 0.020946 | -0.683502371 | 0.02972 | -0.484094243 | 0.122734 |
| LMBR1L    | 0.417782512  | 0.021003 | 0.41371277   | 0.02201 | 0.454150269  | 0.011834 |
| CHFR      | 0.305313103  | 0.021054 | 0.12910453   | 0.32864 | 0.133838608  | 0.31062  |
| HIST1H2BN | -0.438482471 | 0.021077 | -0.143623379 | 0.44657 | -0.064878827 | 0.730371 |
| NFIB      | 0.370357972  | 0.021094 | 0.324991196  | 0.04266 | 0.094864182  | 0.554547 |
| DDIT3     | -1.226801189 | 0.021128 | -1.469376696 | 0.00577 | -1.452240707 | 0.00634  |
| PHYKPL    | 0.288215787  | 0.021133 | 0.017608145  | 0.8878  | 0.150510928  | 0.22626  |
| ACE2      | 1.332098492  | 0.021169 | 1.205395362  | 0.037   | 1.539824269  | 0.007702 |
| PISD      | 0.314785852  | 0.021207 | 0.297105272  | 0.02885 | 0.387528674  | 0.004204 |
| AKAP12    | 0.586157979  | 0.021214 | 0.108601766  | 0.66951 | 0.419070061  | 0.099472 |
| C8orf47   | -0.755259007 | 0.021222 | -0.167476225 | 0.60074 | -0.160859388 | 0.614885 |
| PICALM    | 0.243316337  | 0.021234 | 0.227241324  | 0.03121 | 0.360201896  | 0.000633 |
| SPATA33   | -0.476254596 | 0.021266 | -0.188443223 | 0.3555  | -0.202395047 | 0.319299 |
| GIMAP1    | 1.238100249  | 0.021302 | 0.921682544  | 0.08899 | 0.805769446  | 0.138299 |
| RAB20     | -0.498879049 | 0.021324 | -0.307905944 | 0.15098 | -0.751414759 | 0.000528 |
| RAB6A     | 0.246299208  | 0.021341 | 0.195597981  | 0.06714 | 0.267783149  | 0.012112 |
| TMX3      | -0.277791011 | 0.021366 | 0.022165587  | 0.85315 | -0.130779111 | 0.275641 |
| FREM2     | -0.432654772 | 0.021396 | -0.133329387 | 0.47743 | -0.259449153 | 0.166827 |
| C6orf223  | 1.205690809  | 0.021413 | 0.686355032  | 0.1952  | 0.518824563  | 0.326186 |
| MSL2      | -0.263842145 | 0.021421 | -0.190110523 | 0.0956  | -0.102929822 | 0.365995 |
| METTL21A  | -0.261581692 | 0.021434 | -0.300374908 | 0.00844 | -0.199766588 | 0.07891  |
| SIRT5     | -0.37156802  | 0.021475 | -0.121222671 | 0.44801 | -0.042076151 | 0.792241 |
| NEXN      | 0.52019818   | 0.021487 | -0.150381208 | 0.50972 | 0.419306628  | 0.062313 |
| SH3BP1    | 0.363588662  | 0.02149  | 0.171594521  | 0.27755 | -0.119950388 | 0.449098 |
| ZBTB47    | 0.424548095  | 0.021504 | 0.358030711  | 0.05112 | -0.090031434 | 0.632994 |
| CNRIP1    | 0.778598303  | 0.02154  | 0.40549625   | 0.2332  | 0.518461747  | 0.126122 |
| DSEL      | 0.59269456   | 0.021545 | 0.625812306  | 0.0151  | 0.329076991  | 0.202007 |
| PRSS3P1   | -1.075754622 | 0.02154  | 0.172911348  | 0.71164 | -1.79292144  | 0.000129 |
| AFF1      | 0.366639191  | 0.021584 | 0.013279743  | 0.9337  | -0.088573414 | 0.579121 |

|            |              |          |              |         |              |          |
|------------|--------------|----------|--------------|---------|--------------|----------|
| EXOC5      | -0.275641208 | 0.021608 | -0.085227625 | 0.47553 | 0.06328771   | 0.595665 |
| SOX12      | 0.366517147  | 0.021602 | -0.249886791 | 0.1217  | -0.18308496  | 0.255076 |
| SLC12A4    | 0.469414209  | 0.021626 | 0.03146927   | 0.87773 | 0.395696787  | 0.05255  |
| GPN1       | -0.203887944 | 0.021661 | 0.009241704  | 0.91547 | 0.074196509  | 0.392696 |
| KCTD21     | 0.408083487  | 0.021673 | 0.331379462  | 0.06203 | 0.226373986  | 0.201708 |
| RETSAT     | -0.374602279 | 0.021669 | -0.350898718 | 0.03103 | -0.429482568 | 0.008358 |
| VTI1B      | -0.194105893 | 0.021678 | 0.02692643   | 0.74805 | 0.02429488   | 0.771385 |
| ASTN1      | 1.643384777  | 0.021693 | 1.210010152  | 0.09182 | 0.946855523  | 0.191332 |
| PPWD1      | -0.25839005  | 0.021688 | -0.011343714 | 0.91866 | 0.081853973  | 0.459685 |
| ATP5O      | -0.270074263 | 0.021706 | -0.083096074 | 0.47805 | -0.172564048 | 0.140914 |
| ZBTB8B     | -0.434396259 | 0.021707 | -0.292211358 | 0.11781 | -0.368000391 | 0.049048 |
| MFSD5      | 0.346717969  | 0.021733 | 0.000170617  | 0.9991  | 0.150554173  | 0.315974 |
| MINPP1     | -0.299926466 | 0.021732 | -0.082737053 | 0.52236 | -0.121429738 | 0.348693 |
| RAMP2      | 0.651467135  | 0.021779 | -0.001099008 | 0.99698 | 0.567799878  | 0.043603 |
| RHOBTB3    | 0.340581224  | 0.021775 | 0.193421642  | 0.19249 | 0.263934184  | 0.075135 |
| TARBP2     | -0.314775483 | 0.021775 | -0.032282115 | 0.81079 | -0.081547481 | 0.545669 |
| PCDHGB7    | 0.467140546  | 0.021787 | -0.394402026 | 0.05524 | -0.136455731 | 0.504921 |
| BRI3BP     | -0.3189054   | 0.021811 | -0.165816728 | 0.23215 | -0.373668264 | 0.007137 |
| AXL        | 0.473941729  | 0.021823 | 0.01702557   | 0.9345  | 0.078004777  | 0.706246 |
| NTRK2      | 1.290762012  | 0.021844 | 0.855369067  | 0.12931 | 0.680281101  | 0.227827 |
| AS3MT      | -0.344342371 | 0.021919 | -0.251715697 | 0.08801 | -0.250674393 | 0.088127 |
| STK39      | -0.246287316 | 0.021936 | -0.221208305 | 0.03886 | -0.328162974 | 0.002192 |
| GRAMD4P7   | 0.908791413  | 0.021974 | 0.979675181  | 0.01224 | 0.378027192  | 0.350304 |
| GNS        | -0.257841904 | 0.021987 | -0.150205925 | 0.1811  | -0.301778733 | 0.007299 |
| C19orf26   | 0.976060234  | 0.021998 | 0.44578368   | 0.3019  | 0.192547903  | 0.657503 |
| DERA       | -0.291883834 | 0.022007 | 0.053286176  | 0.67078 | -0.156717833 | 0.213469 |
| PAPD7      | 0.29667521   | 0.022017 | 0.111571931  | 0.38783 | 0.164680062  | 0.202191 |
| CRYL1      | -0.416309384 | 0.022037 | -0.391239378 | 0.03083 | -0.705650983 | 0.000106 |
| GTF2H2     | -0.38384148  | 0.022035 | 0.234157699  | 0.15631 | -0.052794089 | 0.750307 |
| P11-206L10 | -0.947173032 | 0.022029 | -0.299454164 | 0.46374 | -0.424563733 | 0.296858 |
| ELF2       | -0.20594071  | 0.022058 | -0.000467134 | 0.99581 | 0.041437881  | 0.640781 |
| RCCD1      | -0.396656339 | 0.022073 | -0.357260976 | 0.03737 | -0.175511531 | 0.30344  |
| VOPP1      | -0.241652089 | 0.022141 | -0.147052683 | 0.16028 | -0.446951766 | 2.17E-05 |
| C3orf33    | -0.467641435 | 0.022149 | -0.282170793 | 0.1547  | -0.430551505 | 0.030425 |
| ETF1P2     | 0.813662025  | 0.022177 | 0.663744118  | 0.0617  | 0.246485538  | 0.495933 |
| GLUL       | -0.319890206 | 0.022182 | -0.1681359   | 0.22873 | -0.192891735 | 0.167335 |
| SPATA18    | -0.556704278 | 0.022229 | -0.623132558 | 0.01021 | -0.637142075 | 0.008635 |
| ARF1       | 0.235123562  | 0.022278 | 0.070339956  | 0.49382 | 0.029863636  | 0.771522 |
| CD276      | 0.279739478  | 0.022277 | 0.161472328  | 0.18684 | 0.15925662   | 0.192681 |
| HIST1H4J   | -0.626639673 | 0.022279 | -0.241373725 | 0.37818 | -0.178532209 | 0.514449 |
| MATN1      | 1.319411627  | 0.022278 | 0.932275743  | 0.10609 | 0.378133491  | 0.521353 |
| MED16      | 0.348800536  | 0.022267 | 0.011485629  | 0.94012 | -0.028276845 | 0.853446 |
| POM121     | 0.86832741   | 0.022283 | -0.210391828 | 0.58111 | 0.023139996  | 0.951548 |
| ZFYVE27    | 0.32391569   | 0.022259 | 0.160458197  | 0.2572  | 0.238491799  | 0.090162 |
| OSBPL5     | 0.463073586  | 0.022297 | 0.05798567   | 0.77574 | 0.248440305  | 0.220923 |
| TOX4       | 0.279216897  | 0.022306 | 0.167547607  | 0.1695  | 0.269031692  | 0.027202 |
| NUP210     | -0.640798236 | 0.022393 | -0.629767321 | 0.02455 | -0.859885451 | 0.00216  |



|           |              |          |              |         |              |          |
|-----------|--------------|----------|--------------|---------|--------------|----------|
| ACADS     | -0.408923843 | 0.022401 | -0.193416857 | 0.27005 | -0.659369413 | 0.00023  |
| CD37      | -1.776533193 | 0.022426 | 0.49406838   | 0.52253 | 0.085044029  | 0.912488 |
| TVP23B    | -0.325558822 | 0.022421 | -0.062382915 | 0.66025 | 0.009748403  | 0.945158 |
| RFWD3     | -0.313276619 | 0.022433 | -0.049569187 | 0.71665 | -0.01664236  | 0.902743 |
| ZNF740    | -0.326510572 | 0.022466 | -0.057118139 | 0.68853 | -0.07852218  | 0.581148 |
| ZNF480    | -0.306375153 | 0.022481 | -0.350908092 | 0.00848 | -0.06124594  | 0.644809 |
| DNALI1    | -0.36004865  | 0.022507 | -0.445137651 | 0.00476 | -0.128515814 | 0.408688 |
| MRPS17    | -0.286007899 | 0.022517 | -0.123196441 | 0.31871 | -0.296014788 | 0.017109 |
| KIAA0141  | -0.275712683 | 0.022548 | -0.434447716 | 0.00032 | -0.278902866 | 0.020269 |
| CTAGE5    | -0.261682271 | 0.022557 | -0.141534194 | 0.21378 | -0.10648799  | 0.348992 |
| ADPRM     | -0.423217023 | 0.022571 | -0.239265185 | 0.18277 | -0.199686525 | 0.263285 |
| TMEM38A   | -0.568368491 | 0.022588 | -0.525242862 | 0.03432 | -0.533079634 | 0.031563 |
| LSM2      | -0.300876066 | 0.022597 | -0.223491312 | 0.08681 | -0.146812519 | 0.259058 |
| CAMK2D    | -0.252477657 | 0.022609 | -0.005183616 | 0.96251 | -0.225582827 | 0.041097 |
| MORC3     | -0.215174552 | 0.022626 | -0.066004268 | 0.48112 | -0.01865076  | 0.841894 |
| ZNF747    | 0.385700122  | 0.022686 | 0.381211421  | 0.02316 | -0.016565673 | 0.922586 |
| ABHD12    | -0.260413927 | 0.022785 | -0.016868215 | 0.88167 | -0.228209848 | 0.045144 |
| COG4      | -0.2521015   | 0.022792 | -0.194258771 | 0.07633 | -0.192461133 | 0.078806 |
| HOOK1     | -0.508530352 | 0.022792 | -0.059818417 | 0.78808 | -0.140392214 | 0.528518 |
| LPHN2     | 0.303590712  | 0.022787 | 0.244078663  | 0.06701 | 0.386931649  | 0.003671 |
| HIST1H2BD | -0.388822008 | 0.02282  | -0.121581809 | 0.47584 | -0.049302633 | 0.772391 |
| PAFAH1B2  | -0.182610414 | 0.022819 | 0.13197009   | 0.09845 | 0.101421063  | 0.203689 |
| TMEM14B   | -0.230031365 | 0.022853 | -0.082540831 | 0.40779 | -0.165831986 | 0.09696  |
| KIAA0930  | 0.32800823   | 0.022867 | 0.232680669  | 0.10626 | 0.09152397   | 0.524844 |
| TRAF3IP2  | 0.340639356  | 0.022863 | 0.286822878  | 0.05484 | 0.168961629  | 0.25855  |
| XRCC6BP1  | -0.471283067 | 0.022874 | -0.135478507 | 0.49031 | -0.245211192 | 0.2179   |
| WTIP      | 0.551332068  | 0.022914 | 0.524079058  | 0.0306  | 0.549630801  | 0.023212 |
| BDKRB1    | 1.212653054  | 0.022974 | 0.97252341   | 0.0694  | 1.136211267  | 0.032834 |
| FSTL3     | 0.557765278  | 0.022956 | 0.540037054  | 0.02734 | 0.175727715  | 0.47469  |
| TMEM37    | 0.617180775  | 0.022974 | 0.693799184  | 0.01046 | 0.506084105  | 0.061996 |
| TMSB4XP4  | -1.059082203 | 0.02297  | 0.059741342  | 0.88634 | 0.152011456  | 0.713798 |
| RAD50     | -0.250018987 | 0.022988 | -0.219979223 | 0.04458 | -0.267444685 | 0.014545 |
| CYB5R2    | -0.571010124 | 0.023    | -0.4055029   | 0.1043  | -0.485795649 | 0.052207 |
| EFR3B     | 0.668274011  | 0.023067 | 0.070696232  | 0.81117 | 0.644829808  | 0.027979 |
| PEAR1     | 0.968357797  | 0.023067 | 0.592886397  | 0.16413 | -0.275652894 | 0.51964  |
| TTF2      | -0.450954596 | 0.023094 | -0.42104474  | 0.03338 | -0.249424684 | 0.20694  |
| NFE2L1    | 0.414587822  | 0.023129 | 0.082631058  | 0.65081 | 0.246761862  | 0.176359 |
| IGIP      | -0.496789683 | 0.023143 | -0.02756097  | 0.89468 | -0.676594707 | 0.001881 |
| ATAT1     | 0.348455968  | 0.023162 | 0.023693113  | 0.88027 | 0.213652027  | 0.164502 |
| SPG20     | 0.36255758   | 0.023158 | 0.186182855  | 0.24292 | 0.647967621  | 4.59E-05 |
| ITGA7     | 0.947274242  | 0.023174 | 0.63946327   | 0.12583 | 0.052880878  | 0.900768 |
| TRMT13    | -0.340109918 | 0.023183 | -0.350314827 | 0.01855 | 0.02453954   | 0.867875 |
| ITSN1     | 0.255389344  | 0.023201 | 0.0798456    | 0.4782  | 0.493743149  | 1.07E-05 |
| NRIP3     | 0.629393028  | 0.023253 | 0.131976827  | 0.63718 | 0.541431544  | 0.050298 |
| PNPLA6    | 0.499458319  | 0.023249 | 0.27400071   | 0.21265 | 0.168918392  | 0.444565 |
| TIMP3     | 0.555158862  | 0.023241 | 0.308112918  | 0.20791 | 0.185709081  | 0.447938 |
| TMEM126A  | -0.364080832 | 0.023237 | 0.035978562  | 0.81717 | -0.088842258 | 0.568792 |

|             |              |          |              |          |              |          |
|-------------|--------------|----------|--------------|----------|--------------|----------|
| ACYP1       | -0.529845045 | 0.023273 | -0.323106959 | 0.15697  | -0.277424705 | 0.222333 |
| SPDYE3      | 0.399690703  | 0.023354 | 0.126588353  | 0.47499  | 0.279477201  | 0.110405 |
| ZNF433      | -0.409442631 | 0.023371 | -0.2116206   | 0.23078  | -0.104931835 | 0.544791 |
| IP11-986E7. | 1.12977241   | 0.023385 | 1.574973208  | 0.00114  | 1.380618882  | 0.004554 |
| UBAP2L      | 0.334334869  | 0.023384 | 0.097016263  | 0.51095  | 0.258497583  | 0.079538 |
| C4orf19     | 0.418315978  | 0.023405 | 0.745469442  | 4.95E-05 | 0.550557447  | 0.002756 |
| CD46        | -0.232122546 | 0.023424 | -0.254902378 | 0.01274  | -0.145179545 | 0.155799 |
| GATA3       | 1.238676395  | 0.02347  | 0.039827905  | 0.94288  | 0.208286452  | 0.70625  |
| FAM92A1     | -0.293573286 | 0.023492 | 0.0086776    | 0.94617  | 0.168490164  | 0.18804  |
| GPA33       | 1.500162294  | 0.023492 | 0.278496495  | 0.67481  | 0.307969235  | 0.642925 |
| DNAJC10     | -0.24324816  | 0.023523 | 0.079110924  | 0.46031  | -0.042437461 | 0.692154 |
| POGLUT1     | -0.280635328 | 0.023532 | -0.224715589 | 0.0681   | -0.257317986 | 0.036242 |
| ZNF362      | 0.503219253  | 0.02357  | 0.085444747  | 0.70134  | 0.061886412  | 0.780782 |
| KLHDC2      | -0.323005173 | 0.023611 | -0.095368425 | 0.50113  | -0.146787482 | 0.300975 |
| MPP7        | -0.354678374 | 0.023604 | -0.133784228 | 0.38724  | -0.299408537 | 0.053694 |
| CGN         | -0.352236922 | 0.023684 | -0.250726933 | 0.10684  | 0.076512417  | 0.622319 |
| POU4F1      | 1.482869805  | 0.023698 | 0.866300706  | 0.19048  | 0.970366838  | 0.141056 |
| AGBL4       | -0.879381325 | 0.023732 | -0.418204017 | 0.26389  | -0.735989787 | 0.052988 |
| GDF15       | -0.845970174 | 0.023735 | -1.442315635 | 0.00012  | -0.876903961 | 0.019042 |
| RAB4A       | -0.285753762 | 0.023728 | -0.171416011 | 0.17229  | -0.110145543 | 0.379552 |
| RGMA        | 0.667044273  | 0.023722 | -0.049385246 | 0.86731  | -0.168586264 | 0.56923  |
| HOXB3       | 0.699074965  | 0.023763 | -0.509238844 | 0.10255  | 0.400954107  | 0.195169 |
| RHOV        | 1.033624449  | 0.023763 | 1.235564827  | 0.00667  | 0.645383829  | 0.158748 |
| FNTB        | 0.364331052  | 0.023774 | -0.161626476 | 0.31491  | -0.131096551 | 0.414697 |
| LAMP3       | 0.880505055  | 0.023791 | 1.26116004   | 0.00082  | 0.48766699   | 0.210775 |
| CYB561A3    | -0.270899762 | 0.023827 | -0.171785828 | 0.14741  | -0.277265798 | 0.019697 |
| SLC39A5     | -0.399855211 | 0.023832 | -0.549900213 | 0.00187  | -0.418102424 | 0.017957 |
| PHB         | -0.299033857 | 0.023843 | -0.143810618 | 0.27642  | -0.168933896 | 0.20107  |
| AUNIP       | -0.465588669 | 0.023865 | 0.018605578  | 0.92585  | -0.100987594 | 0.614538 |
| PTGFR       | 0.858015596  | 0.023872 | -0.16833497  | 0.66819  | 1.229820133  | 0.00104  |
| PRELID1     | 0.409986195  | 0.023887 | 0.273646003  | 0.13145  | 0.517381897  | 0.004312 |
| HMGB1P10    | -1.689129547 | 0.023901 | -1.089750258 | 0.13231  | -0.933199334 | 0.194624 |
| CPNE5       | 1.316518943  | 0.02392  | 1.22652334   | 0.03669  | 0.780288717  | 0.197486 |
| AC093642.5  | -0.765980904 | 0.023953 | -0.572240102 | 0.08793  | -0.83014696  | 0.014037 |
| C1QBP       | -0.330905677 | 0.023961 | -0.146636509 | 0.31573  | -0.133365283 | 0.36131  |
| CDA         | 1.33519001   | 0.023956 | 0.636842744  | 0.28604  | 0.122165859  | 0.840463 |
| NAPA        | 0.24522552   | 0.023965 | -0.104024968 | 0.33967  | 0.114831683  | 0.289462 |
| SMAD6       | 0.464491761  | 0.023969 | 0.696098114  | 0.00063  | 0.037188058  | 0.856278 |
| TMCO3       | -0.369846812 | 0.023935 | -0.143013283 | 0.38129  | -0.105182389 | 0.519276 |
| ZNF684      | -0.592031458 | 0.023943 | -0.192661906 | 0.44531  | -0.20327703  | 0.420571 |
| HMMR        | -0.465521206 | 0.023998 | -0.024926042 | 0.9032   | -0.000209324 | 0.999184 |
| HEATR3      | -0.352809945 | 0.024019 | -0.053243869 | 0.73083  | -0.127540799 | 0.410308 |
| PTPRF       | -0.310418977 | 0.024025 | -0.241011511 | 0.07955  | -0.369284161 | 0.00726  |
| AMPD2       | 0.281697619  | 0.024057 | -0.144262286 | 0.24828  | 0.063801202  | 0.609621 |
| PRDM1       | 0.601814326  | 0.024083 | 0.170587009  | 0.52461  | -0.371777531 | 0.166049 |
| ASAH2B      | -0.429183877 | 0.024123 | -0.159903174 | 0.39461  | 0.068709409  | 0.711778 |
| HLA-A       | 0.347948524  | 0.024119 | 0.148400251  | 0.33611  | -0.073241773 | 0.635145 |

|             |              |          |              |          |              |          |
|-------------|--------------|----------|--------------|----------|--------------|----------|
| HLCS        | -0.359657467 | 0.024121 | -0.453045127 | 0.00435  | -0.554262018 | 0.00048  |
| PHB2        | -0.200075106 | 0.024113 | -0.14301566  | 0.10617  | -0.093529881 | 0.290192 |
| CSNK1D      | 0.259587898  | 0.024149 | 0.150225116  | 0.19205  | 0.123049361  | 0.28474  |
| TFB2M       | -0.336539809 | 0.024175 | -0.07541423  | 0.60328  | -0.000552573 | 0.996939 |
| MGLL        | 0.79263522   | 0.024224 | 0.436055708  | 0.21529  | 0.762167951  | 0.030183 |
| PLCB2       | -0.981033033 | 0.024225 | -0.83772411  | 0.05411  | -0.917511469 | 0.031385 |
| SYNPO2      | 0.522348743  | 0.024228 | -0.05474859  | 0.81344  | 0.580520768  | 0.012209 |
| ZNF761      | -0.307585118 | 0.024233 | -0.210635188 | 0.1201   | -0.18165615  | 0.179347 |
| MGST1       | -0.397118843 | 0.024246 | -0.20249596  | 0.24958  | -0.304140145 | 0.083805 |
| TSHZ1       | 0.426808863  | 0.024261 | 0.086192942  | 0.64988  | 0.229515837  | 0.225201 |
| TTC19       | -0.243717449 | 0.024284 | -0.021254497 | 0.84245  | -0.164108502 | 0.125662 |
| BEAN1       | 1.118516833  | 0.024311 | 0.899685801  | 0.06846  | 0.441802608  | 0.37725  |
| SLC25A14    | -0.40924076  | 0.024332 | -0.199399967 | 0.25346  | 0.026776874  | 0.875849 |
| HDHD1       | -0.268057267 | 0.024359 | -0.14600523  | 0.2129   | -0.122506686 | 0.293995 |
| OVOL1       | -0.41308798  | 0.024354 | -0.507084871 | 0.00563  | -0.599478454 | 0.001082 |
| EML2        | -0.476572887 | 0.024383 | -0.138718453 | 0.50644  | -0.58161734  | 0.005694 |
| GUCA2A      | 2.256322494  | 0.02438  | -0.329943236 | 0.75945  | 0.803214177  | 0.433751 |
| ECT2        | -0.360199013 | 0.024392 | -0.124466708 | 0.43564  | 0.091360308  | 0.566894 |
| ZNF865      | 0.575898237  | 0.024407 | -0.098565761 | 0.70915  | -0.092388359 | 0.725317 |
| FILIP1L     | 0.38502953   | 0.024422 | 0.384846118  | 0.02435  | 0.400232487  | 0.019158 |
| PPP4R2      | 0.237287591  | 0.024421 | 0.558139097  | 1.11E-07 | 0.432843466  | 3.79E-05 |
| NPRL2       | -0.47109221  | 0.024441 | -0.360444276 | 0.08403  | -0.332370916 | 0.111152 |
| HIST1H4A    | -0.481272886 | 0.024451 | -0.25203817  | 0.23816  | -0.234394538 | 0.272558 |
| HOMER3      | 0.545226015  | 0.024471 | 0.42860207   | 0.07713  | 0.360347452  | 0.13809  |
| TCTEX1D2    | -0.584738079 | 0.024483 | -0.379038807 | 0.13657  | 0.000488996  | 0.998436 |
| ST8SIA6     | 0.759101863  | 0.024497 | 0.299169015  | 0.37728  | 0.507779393  | 0.132759 |
| PAK1IP1     | -0.286686308 | 0.024509 | -0.121104006 | 0.33481  | -0.008921602 | 0.943005 |
| DLX1        | 3.074244046  | 0.024539 | 3.889469463  | 0.0041   | 1.702611081  | 0.213678 |
| PANK1       | -0.293134681 | 0.024552 | -0.167507076 | 0.19583  | -0.008954479 | 0.94465  |
| TRIM34      | -0.504060694 | 0.024623 | 0.104686434  | 0.63118  | -0.238172159 | 0.278254 |
| HELB        | 0.320309394  | 0.024631 | 0.207931081  | 0.14394  | 0.043358265  | 0.760519 |
| UBXN8       | -0.421816421 | 0.024654 | -0.237103325 | 0.19754  | -0.318236299 | 0.082353 |
| CLDN16      | 1.560008291  | 0.024673 | 1.141500419  | 0.10355  | 0.380237531  | 0.599127 |
| DDB1        | 0.159637842  | 0.024666 | 0.107686471  | 0.12901  | 0.216247309  | 0.002282 |
| PAPSS2      | 0.568894568  | 0.024742 | 0.713459515  | 0.00478  | -0.326575774 | 0.200543 |
| RASSF4      | 0.506125371  | 0.024745 | 0.202725583  | 0.37027  | 0.311086682  | 0.16725  |
| IP11-137H2. | -0.279435453 | 0.024782 | -0.121714231 | 0.32135  | -0.277511327 | 0.024305 |
| CTSA        | 0.453767283  | 0.024837 | 0.114084982  | 0.5727   | -0.23692516  | 0.242158 |
| C1orf159    | 0.397792491  | 0.024845 | 0.24445371   | 0.16714  | 0.361952316  | 0.039651 |
| SPEF2       | -0.634783214 | 0.024885 | -0.470671027 | 0.09332  | -0.383581108 | 0.171011 |
| VCP         | 0.217723829  | 0.024908 | 0.38467857   | 7.26E-05 | 0.315420995  | 0.00114  |
| ITSN2       | 0.437312877  | 0.024936 | 0.555133272  | 0.00423  | 0.353108461  | 0.069604 |
| LNX2        | -0.350400687 | 0.024937 | -0.079527989 | 0.60912  | -0.033929327 | 0.827177 |
| SDHAF1      | -0.418341647 | 0.024934 | -0.210911831 | 0.24313  | -0.30724837  | 0.08989  |
| SHISA3      | 1.043443429  | 0.024936 | 1.368154607  | 0.0032   | 1.095307651  | 0.018386 |
| NFIA        | 0.563386944  | 0.024985 | 0.406867894  | 0.10541  | -0.039761089 | 0.87444  |
| PDGFC       | 0.478754926  | 0.024983 | 0.462118423  | 0.0304   | 0.660527975  | 0.001963 |

|          |              |          |              |         |              |          |
|----------|--------------|----------|--------------|---------|--------------|----------|
| CA4      | 2.115235519  | 0.025055 | 1.112768051  | 0.24031 | 1.788098872  | 0.058402 |
| UQCRC1   | -0.305169408 | 0.025069 | -0.14193211  | 0.29681 | -0.239824167 | 0.077979 |
| SOD3     | 1.04535929   | 0.025085 | -0.046990723 | 0.92075 | -0.214091949 | 0.651069 |
| ANKS6    | -0.314259417 | 0.025113 | -0.359764366 | 0.01008 | -0.265004607 | 0.05813  |
| C15orf39 | 0.383629719  | 0.025123 | -0.059508445 | 0.73044 | -0.165314568 | 0.336998 |
| SIVA1    | -0.389608412 | 0.025124 | -0.164003702 | 0.3423  | -0.515451697 | 0.002917 |
| GRB2     | 0.245302332  | 0.02522  | 0.102778771  | 0.34797 | 0.233925609  | 0.032375 |
| STAG2    | -0.192540262 | 0.025217 | -0.083218646 | 0.33181 | 0.069825254  | 0.414958 |
| HSPA4L   | -0.541908859 | 0.025304 | -0.432997431 | 0.07316 | -0.160944652 | 0.504935 |
| ANKEF1   | -0.422597387 | 0.025316 | -0.039314592 | 0.83322 | -0.247539628 | 0.186318 |
| ERCC6L2  | -0.22788408  | 0.025319 | -0.056362117 | 0.57821 | 0.062830428  | 0.534437 |
| AGO2     | 0.419763346  | 0.025343 | 0.053295017  | 0.77654 | 0.263905461  | 0.159578 |
| DFNA5    | -0.591061064 | 0.025346 | -0.086954579 | 0.73851 | -0.366299753 | 0.162618 |
| LCP1     | 1.528401973  | 0.025391 | 2.308697381  | 0.00072 | 1.599147306  | 0.01928  |
| WRN      | -0.324636341 | 0.02539  | -0.097091308 | 0.49941 | -0.260997751 | 0.06989  |
| ZBTB7C   | -0.622358451 | 0.025397 | 0.051989329  | 0.85054 | -1.266094252 | 6.22E-06 |
| COA5     | -0.315722034 | 0.025442 | -0.144780466 | 0.29998 | -0.26438454  | 0.057895 |
| POR      | 0.339190657  | 0.025494 | 0.061646849  | 0.68492 | 0.224514391  | 0.13931  |
| BAALC    | 1.388164484  | 0.025528 | 1.18607845   | 0.05575 | 0.477418039  | 0.446567 |
| DPYSL4   | 0.681002916  | 0.025514 | 0.213448879  | 0.48436 | 0.310371117  | 0.309027 |
| GPR110   | 0.986169724  | 0.025525 | 0.753249833  | 0.08819 | 0.727608265  | 0.099301 |
| OLFM2    | 0.511212032  | 0.025531 | 0.079320556  | 0.73091 | 0.144799967  | 0.526994 |
| RGN      | -0.947221462 | 0.02555  | -0.302168826 | 0.44726 | 0.026938541  | 0.94564  |
| SBSPON   | -0.697059424 | 0.02554  | -0.138291416 | 0.65357 | -0.429104478 | 0.165571 |
| ZBTB24   | -0.308758235 | 0.025545 | -0.027442393 | 0.83999 | -0.076662829 | 0.572672 |
| FGFBP1   | 1.023036124  | 0.025562 | 0.131452768  | 0.77574 | -0.025996601 | 0.955135 |
| INTS10   | -0.250606211 | 0.025575 | -0.131792388 | 0.23587 | -0.146670163 | 0.186999 |
| SMU1     | -0.124494117 | 0.025608 | -0.045541937 | 0.40835 | 0.098629115  | 0.070963 |
| PSMG1    | -0.344488563 | 0.025617 | -0.052348951 | 0.73141 | -0.098332322 | 0.518852 |
| LYRM1    | 0.35678013   | 0.02565  | 0.354943875  | 0.0257  | 0.497652396  | 0.00167  |
| CBLN3    | 0.895722941  | 0.025697 | 0.2921682    | 0.47094 | -0.085331503 | 0.835164 |
| TM2D1    | -0.239928216 | 0.025691 | -0.061600093 | 0.55841 | -0.091519319 | 0.38407  |
| FUT6     | 0.817802966  | 0.025721 | 0.342644153  | 0.36659 | 0.312457449  | 0.405645 |
| GTPBP6   | 0.324865494  | 0.025721 | 0.162716937  | 0.26363 | -0.154824438 | 0.291646 |
| EDNRA    | 0.581219888  | 0.025774 | 0.457436107  | 0.07923 | 0.655926982  | 0.011812 |
| GUCD1    | 0.261773537  | 0.025789 | 0.075203574  | 0.52183 | 0.103655448  | 0.37699  |
| SASH1    | -0.309248414 | 0.025811 | 0.020954484  | 0.87835 | -0.166294778 | 0.224995 |
| DPP9     | 0.419860103  | 0.025828 | 0.185100083  | 0.32552 | 0.173580038  | 0.357473 |
| KATNB1   | 0.455900976  | 0.025899 | 0.29058751   | 0.15305 | 0.236219198  | 0.248707 |
| PAAF1    | -0.407648537 | 0.025964 | -0.197864779 | 0.27465 | -0.485383851 | 0.007628 |
| PARP1P1  | 0.707838423  | 0.026016 | 0.636214053  | 0.04391 | 0.708081967  | 0.023637 |
| ACSL5    | 0.439680078  | 0.026045 | 0.495824955  | 0.01197 | 0.201117425  | 0.308654 |
| LRRC20   | -0.543353675 | 0.026062 | -0.607260922 | 0.01271 | -0.575829305 | 0.01758  |
| UGT2B11  | -1.083176383 | 0.026075 | -0.612762439 | 0.20456 | -0.257579555 | 0.589128 |
| EIF3E    | -0.355402401 | 0.026105 | -0.361600779 | 0.02356 | -0.042634721 | 0.789445 |
| FILIP1   | 0.721588521  | 0.026112 | 0.204438174  | 0.5307  | 0.462259197  | 0.154753 |
| IRF3     | 0.271806364  | 0.026124 | 0.077118712  | 0.52636 | 0.108332988  | 0.37425  |

|               |              |          |              |          |              |          |
|---------------|--------------|----------|--------------|----------|--------------|----------|
| GTF2H2B       | -0.359963075 | 0.02614  | -0.177788836 | 0.26816  | -0.146561182 | 0.360765 |
| ARHGAP35      | 0.396522268  | 0.026149 | 0.238033806  | 0.18124  | 0.545761992  | 0.002148 |
| CBR4          | -0.261753368 | 0.026175 | -0.220018539 | 0.05947  | -0.083973617 | 0.470141 |
| SPDEF         | -1.051341031 | 0.026238 | -0.796906189 | 0.09098  | -1.272106167 | 0.007149 |
| IKZF2         | -0.421753148 | 0.026261 | -0.2780952   | 0.14176  | -0.292682719 | 0.122102 |
| RPS19BP1      | -0.286889662 | 0.026262 | 0.017321488  | 0.89152  | -0.399980537 | 0.001807 |
| ENPP4         | -0.434919586 | 0.026282 | -0.086571701 | 0.65589  | -0.200830807 | 0.301647 |
| TNFAIP8       | 0.503851682  | 0.026286 | 0.778980647  | 0.00058  | 0.79163104   | 0.000467 |
| MAX           | 0.266784113  | 0.026413 | 0.28816224   | 0.01616  | 0.392341307  | 0.001025 |
| TTF1          | -0.352539081 | 0.026409 | -0.194683718 | 0.21424  | -0.05962946  | 0.700643 |
| ZDHHC3        | 0.23361713   | 0.026422 | 0.150780043  | 0.14987  | 0.160529832  | 0.124945 |
| CXADR         | -0.319792598 | 0.026433 | -0.195964027 | 0.17301  | -0.260398026 | 0.070157 |
| ATP2C1        | -0.219734677 | 0.026446 | 0.197521799  | 0.04449  | 0.035565511  | 0.717682 |
| HIST1H4F      | -0.529806989 | 0.02645  | -0.186714698 | 0.43314  | -0.081420005 | 0.732381 |
| CYP2C8        | -1.235048399 | 0.026469 | -0.345077658 | 0.51731  | 0.284730665  | 0.588101 |
| FAM229B       | -0.61045746  | 0.026466 | -0.046702982 | 0.86123  | -0.217429037 | 0.418763 |
| FAM149A       | -0.415286839 | 0.026497 | -0.177902823 | 0.33608  | -0.244889164 | 0.187059 |
| GAP43         | 2.161846398  | 0.026529 | 3.005651784  | 0.00197  | 1.199016564  | 0.220658 |
| POLR2F        | -0.265536166 | 0.026632 | -0.195370741 | 0.09815  | -0.167810426 | 0.153326 |
| ZFPL1         | 0.390856921  | 0.026625 | 0.273102518  | 0.11995  | 0.493660368  | 0.004849 |
| AIM1          | 0.628594435  | 0.026658 | 0.471652756  | 0.09618  | 0.254579894  | 0.369786 |
| ATP5F1        | -0.210540499 | 0.026659 | 1.95E-05     | 0.99984  | 0.010450342  | 0.911995 |
| ABCD1         | 0.473231175  | 0.026668 | 0.41954151   | 0.04865  | 0.052654815  | 0.807372 |
| NDUFA8        | -0.241141904 | 0.026681 | -0.196312275 | 0.06726  | -0.335756236 | 0.001843 |
| PRRG1         | 0.516995605  | 0.026689 | 0.386239819  | 0.09774  | 0.384686957  | 0.099105 |
| CCDC3         | 0.656013244  | 0.026709 | 0.375596006  | 0.20482  | 0.594699759  | 0.044412 |
| TTC4          | -0.245650853 | 0.026721 | 0.156022008  | 0.14667  | 0.121200234  | 0.257869 |
| AKIRIN1       | 0.255375457  | 0.026743 | 0.173225629  | 0.13217  | 0.3350868    | 0.003528 |
| PPP11-427H3.  | 0.371360679  | 0.026748 | 0.150453014  | 0.36972  | 0.118397021  | 0.480133 |
| TMED2         | -0.203989293 | 0.026773 | -0.018283807 | 0.84234  | -0.127914203 | 0.164255 |
| OXNAD1        | -0.262950711 | 0.026781 | -0.072055487 | 0.53418  | -0.033654029 | 0.76984  |
| G3BP1         | -0.207999823 | 0.026789 | -0.066671217 | 0.47719  | -0.046763505 | 0.617959 |
| MMP2          | 0.398506344  | 0.02684  | -0.032105022 | 0.85847  | 0.02302441   | 0.898207 |
| RN7SL467P     | -0.596719804 | 0.026836 | 0.002077618  | 0.99348  | -0.390605255 | 0.132974 |
| RORB          | 1.818576842  | 0.026838 | 3.427222916  | 2.51E-05 | 0.727181985  | 0.38127  |
| STARD9        | 0.599606707  | 0.026844 | 0.170661274  | 0.5302   | 0.111389452  | 0.680917 |
| ATPIF1        | -0.279635205 | 0.026853 | -0.229762673 | 0.06813  | -0.240106542 | 0.056344 |
| TMEM254       | -0.33553297  | 0.026868 | -0.205628382 | 0.16987  | -0.3233838   | 0.031813 |
| JUNB          | 0.749512724  | 0.026889 | 0.597254907  | 0.07778  | 0.038190487  | 0.910316 |
| MT-ND5        | 0.660900194  | 0.026985 | 0.412009474  | 0.16797  | 0.333121286  | 0.264958 |
| MTX3          | -0.329004078 | 0.026971 | -0.395349756 | 0.007    | -0.436519331 | 0.002969 |
| SYS1          | 0.279020771  | 0.026981 | 0.253132917  | 0.04346  | 0.206437138  | 0.099481 |
| AJAP1         | 1.270295321  | 0.027023 | 0.71671688   | 0.21656  | 0.402150045  | 0.492306 |
| DNAAF2        | -0.316012161 | 0.027073 | -0.042928468 | 0.7578   | 0.002654369  | 0.984709 |
| PIN1          | 0.259557435  | 0.027069 | 0.150860565  | 0.19808  | 0.079661626  | 0.495974 |
| PPP11-574K11. | 0.761969058  | 0.027089 | -0.951269094 | 0.00615  | -0.144693288 | 0.672904 |
| APOA2         | 1.917612886  | 0.027098 | 0.054929403  | 0.94971  | 0.9990972    | 0.250104 |

|            |              |          |              |         |              |          |
|------------|--------------|----------|--------------|---------|--------------|----------|
| DPF2       | 0.263112408  | 0.027105 | -0.017267615 | 0.88499 | 0.159860838  | 0.178601 |
| C1orf226   | 0.603327214  | 0.027146 | 0.31875498   | 0.24358 | 0.010621928  | 0.969155 |
| ZBTB14     | 0.918879598  | 0.027149 | 1.075598391  | 0.00922 | 0.822243042  | 0.049574 |
| DHX36      | -0.301866043 | 0.027177 | 0.110785931  | 0.4145  | -0.132833335 | 0.327713 |
| ST6GAL2    | 0.711004316  | 0.027174 | -0.25216236  | 0.43439 | 0.516917134  | 0.108054 |
| DYX1C1     | -0.416793281 | 0.02721  | -0.334260724 | 0.06956 | -0.435599794 | 0.018446 |
| SERPINE2   | 0.71769471   | 0.027207 | 1.032163311  | 0.00147 | 0.117676979  | 0.717479 |
| PDE9A      | 0.347718113  | 0.027255 | 0.176444968  | 0.26205 | 0.253273849  | 0.106902 |
| ERH        | -0.264203793 | 0.027276 | 0.107933144  | 0.36518 | 0.012697933  | 0.915154 |
| FSTL1      | 0.585317092  | 0.027285 | 0.684923646  | 0.00978 | 0.306703664  | 0.247388 |
| ANXA3      | 0.269361117  | 0.027395 | 0.375819891  | 0.00203 | 0.505489016  | 3.20E-05 |
| PRIM2      | -1.089452517 | 0.027392 | 0.283057321  | 0.55545 | -0.031527676 | 0.948021 |
| RPSA       | -0.262132483 | 0.027423 | -0.15643405  | 0.18793 | -0.123436899 | 0.298771 |
| XNC01-221F | -0.709026209 | 0.027443 | -0.013464241 | 0.96429 | -0.157942139 | 0.601379 |
| DTD1       | -0.33589927  | 0.027479 | -0.219205561 | 0.14517 | -0.107561035 | 0.472068 |
| S1PR1      | 0.855869135  | 0.027573 | 0.63783309   | 0.10072 | 1.03659927   | 0.007358 |
| CD44       | 0.778149116  | 0.027611 | 1.029847821  | 0.00354 | 1.302123294  | 0.000226 |
| GMPR2      | -0.25227008  | 0.027621 | -0.176418038 | 0.12175 | 0.034036218  | 0.76442  |
| MDC1       | 0.479744411  | 0.027622 | -0.013095354 | 0.95215 | 0.292038124  | 0.179379 |
| C7orf73    | -0.200177489 | 0.027651 | -0.112574347 | 0.20915 | -0.06009811  | 0.500649 |
| CDK4       | -0.283430302 | 0.027659 | -0.307996843 | 0.01656 | -0.228771849 | 0.074778 |
| STX11      | 1.856210084  | 0.027682 | 1.34197472   | 0.11947 | 1.810288671  | 0.030048 |
| CELF2      | 0.543285449  | 0.027692 | -0.482030614 | 0.05212 | 0.311136716  | 0.207303 |
| TTI1       | -0.224773576 | 0.027704 | -0.172781026 | 0.08665 | -0.069867146 | 0.485651 |
| PSMD8      | 0.240360057  | 0.02774  | 0.124773427  | 0.25253 | 0.241272397  | 0.026758 |
| NCAPD3     | -0.367776063 | 0.027844 | -0.13758942  | 0.40801 | -0.21418667  | 0.197525 |
| ABTB2      | 0.752596737  | 0.027861 | 0.412124006  | 0.2296  | 0.524495162  | 0.125127 |
| EPCAM      | -0.434255966 | 0.027873 | -0.236575504 | 0.23073 | -0.217000892 | 0.271599 |
| IP11-343C2 | 1.379456017  | 0.027888 | 1.221603188  | 0.0514  | 1.226476296  | 0.050286 |
| GALK2      | -0.323328922 | 0.02791  | -0.246895524 | 0.09007 | -0.338732069 | 0.019955 |
| DLG1       | 0.21307437   | 0.027927 | 0.161708985  | 0.09434 | 0.282856327  | 0.003408 |
| PBX2       | 0.177811553  | 0.027923 | -0.0793011   | 0.32701 | 0.14641291   | 0.069215 |
| DYNLL1     | -0.192795164 | 0.027971 | -0.004141514 | 0.96216 | 0.04292118   | 0.622543 |
| SERPINB6   | -0.307832723 | 0.028013 | -0.348436628 | 0.01279 | -0.229079893 | 0.101209 |
| XPNPEP1    | 0.236367173  | 0.028006 | -0.021075517 | 0.84437 | 0.193559251  | 0.071027 |
| SCAND1     | 0.706981655  | 0.028038 | 0.498869698  | 0.12064 | -0.060757477 | 0.851284 |
| ZC3H7B     | 0.194791999  | 0.028047 | -0.042411859 | 0.63272 | 0.105667915  | 0.232435 |
| RHOBTB2    | 0.385010613  | 0.028061 | -0.084121419 | 0.63194 | 0.205026829  | 0.242176 |
| NDUFB4     | -0.213475149 | 0.028084 | 0.074095676  | 0.43972 | 0.057115671  | 0.550985 |
| TTC30A     | -0.260140051 | 0.028158 | 0.046865795  | 0.68784 | -0.176983346 | 0.131104 |
| TBCD       | -0.320804994 | 0.028223 | -0.282155614 | 0.05293 | -0.180429897 | 0.214927 |
| TNS3       | 0.326626737  | 0.028223 | 0.033112078  | 0.82407 | 0.26131673   | 0.079113 |
| EXO1       | -0.563144647 | 0.028235 | -0.377242885 | 0.13844 | -0.25642369  | 0.313321 |
| NECAP2     | 0.24816134   | 0.028263 | 0.230014895  | 0.04134 | 0.261450899  | 0.020186 |
| SSBP3      | 0.358256605  | 0.028262 | 0.021423233  | 0.89617 | 0.148573577  | 0.363614 |
| TBC1D15    | -0.308193205 | 0.028251 | -0.114033062 | 0.41258 | -0.015148195 | 0.913119 |
| R3HDM1     | 0.351935144  | 0.028286 | -0.054118223 | 0.7361  | 0.131873135  | 0.411056 |

|           |              |          |              |          |              |          |
|-----------|--------------|----------|--------------|----------|--------------|----------|
| OCIAD1    | -0.20110147  | 0.028351 | -0.114068198 | 0.21054  | -0.076401583 | 0.401447 |
| IFNGR2    | 0.396390237  | 0.028368 | 0.478173505  | 0.00813  | 0.474226932  | 0.008671 |
| MMP12     | 2.293197362  | 0.028382 | 4.146997578  | 4.93E-05 | 2.858108928  | 0.005635 |
| TYMS      | -0.381446305 | 0.028439 | -0.296721585 | 0.08637  | -0.380335776 | 0.027806 |
| BIVM      | -0.30388731  | 0.028462 | -0.066644539 | 0.6268   | -0.111565864 | 0.416548 |
| CAMKK2    | -0.255378028 | 0.02848  | -0.173398515 | 0.13248  | -0.156818492 | 0.173138 |
| LETM1     | 0.249847351  | 0.028477 | -0.019618909 | 0.86344  | -0.008007503 | 0.943958 |
| RLIM      | -0.164274923 | 0.028468 | 0.028761839  | 0.69945  | 0.065453246  | 0.379211 |
| E2F7      | -0.583772499 | 0.02853  | -0.721882474 | 0.00671  | -0.375571115 | 0.157206 |
| NUCKS1    | -0.282237354 | 0.028577 | -0.178717608 | 0.16548  | -0.084403816 | 0.512363 |
| C14orf142 | -0.376224522 | 0.028592 | -0.033397495 | 0.83676  | -0.237559951 | 0.148014 |
| GRIPAP1   | 0.2744577    | 0.028653 | 0.134537215  | 0.28137  | 0.165741853  | 0.184205 |
| E2F4      | 0.184276012  | 0.028678 | 0.022256932  | 0.79117  | 0.177087754  | 0.034441 |
| RASL11A   | 0.515740107  | 0.028817 | -0.002803986 | 0.99055  | 0.35308362   | 0.132577 |
| YY1       | -0.200374425 | 0.028824 | -0.051829548 | 0.57087  | -0.1104278   | 0.227081 |
| ZCCHC7    | -0.330437216 | 0.028844 | -0.21961399  | 0.14317  | -0.338726026 | 0.024146 |
| PCDHA4    | -0.380339581 | 0.028882 | -0.298757534 | 0.08402  | -0.481583189 | 0.005554 |
| MTO1      | -0.297749667 | 0.028893 | -0.185026494 | 0.17174  | -0.18876841  | 0.163115 |
| SUGP1     | 0.397885294  | 0.028956 | 0.26517873   | 0.14491  | 0.49659525   | 0.00614  |
| COL1A1    | 0.710606799  | 0.028975 | 0.727487476  | 0.02537  | -0.11959143  | 0.713255 |
| MEGF9     | -0.212539076 | 0.029032 | -0.074594083 | 0.43656  | 0.017746388  | 0.852247 |
| HCAR2     | 2.007801788  | 0.029061 | 0.931295057  | 0.31404  | 0.544793742  | 0.557148 |
| PARG      | -0.417838158 | 0.029056 | -0.263114104 | 0.16565  | -0.212853116 | 0.260193 |
| RPL29     | -0.267442939 | 0.02909  | -0.219767461 | 0.07279  | -0.300697247 | 0.0141   |
| GREM2     | 0.513030386  | 0.029122 | -0.090701593 | 0.70098  | 0.519317254  | 0.026877 |
| TEAD4     | 0.4355615    | 0.029118 | 0.162827249  | 0.41564  | 0.072711521  | 0.716383 |
| VAV2      | -0.353267709 | 0.029135 | -0.476328475 | 0.00323  | -0.314656833 | 0.051084 |
| SMOX      | 0.718617472  | 0.029273 | 0.793317644  | 0.01567  | 0.197344024  | 0.549969 |
| X1A-SULT1 | 0.41139154   | 0.029315 | -0.024220498 | 0.89866  | 0.13210986   | 0.484511 |
| PRLR      | -1.524313631 | 0.029361 | -1.349605118 | 0.04651  | -0.851901286 | 0.214495 |
| TAOK1     | 0.198698613  | 0.029384 | 0.102975239  | 0.25845  | 0.115886854  | 0.203075 |
| TMA16     | -0.276182273 | 0.029397 | -0.227768225 | 0.06857  | -0.064191453 | 0.604036 |
| DPEP1     | 1.787607877  | 0.029436 | 0.800998845  | 0.34773  | -0.089176406 | 0.918922 |
| AB11FIP1P | 0.426728842  | 0.029459 | 0.044757872  | 0.82075  | 0.21136637   | 0.280446 |
| KLHL2     | -0.404813418 | 0.029482 | 0.04208445   | 0.81905  | 0.14333996   | 0.434759 |
| PSMD10    | -0.332382817 | 0.029481 | -0.050912809 | 0.73724  | -0.215790016 | 0.155606 |
| ZHX1      | -0.214285394 | 0.029505 | -0.169710938 | 0.083    | 0.095827186  | 0.325362 |
| GNB4      | 0.386864142  | 0.029521 | 0.019842628  | 0.9112   | 0.333389957  | 0.060469 |
| GPS2      | 0.273103184  | 0.029514 | 0.251461605  | 0.04473  | 0.319076276  | 0.010674 |
| ARHGEF2   | 0.272055754  | 0.029569 | 0.11404503   | 0.36145  | 0.135516732  | 0.277978 |
| LRRC37A6P | -0.772436844 | 0.02961  | -0.328732778 | 0.31821  | -0.372357286 | 0.261801 |
| CAPZA2    | -0.219514256 | 0.029637 | -0.028766667 | 0.77481  | -0.046940761 | 0.640502 |
| CNOT6L    | -0.218164989 | 0.029648 | -0.142089376 | 0.15381  | -0.268184828 | 0.007166 |
| ING3      | -0.322642408 | 0.029658 | -0.086666343 | 0.55303  | 0.094005677  | 0.517403 |
| EWSR1     | 0.226162474  | 0.029689 | 0.067581814  | 0.51579  | 0.353768091  | 0.000659 |
| FAM126A   | 0.472749027  | 0.029813 | 0.468350215  | 0.03127  | 0.873757155  | 5.72E-05 |
| SNRPB2    | -0.211341704 | 0.029817 | 0.026175766  | 0.78581  | 0.141871279  | 0.138619 |

|            |              |          |              |         |              |          |
|------------|--------------|----------|--------------|---------|--------------|----------|
| UMPS       | -0.356875541 | 0.029836 | -0.031302999 | 0.84805 | -0.04976167  | 0.760413 |
| SRPR       | 0.23757578   | 0.029847 | 0.127816782  | 0.24166 | 0.170339044  | 0.118783 |
| MMAB       | -0.267932092 | 0.029866 | -0.180127951 | 0.1428  | -0.14377873  | 0.240526 |
| HMGB1      | -0.23099579  | 0.029948 | -0.025714441 | 0.80887 | 0.050897644  | 0.632015 |
| RASGRF2    | 0.987222181  | 0.029951 | 0.371884918  | 0.42113 | 0.236827312  | 0.605713 |
| AC112229.4 | 0.811481919  | 0.029992 | -0.047412445 | 0.9024  | -0.067432827 | 0.860352 |
| CTCF       | -0.159811132 | 0.029973 | -0.031553227 | 0.66506 | -0.007126583 | 0.921921 |
| PPFIA1     | 0.248295707  | 0.029988 | 0.129015707  | 0.2586  | 0.271531192  | 0.017113 |
| RAP2B      | -0.228571289 | 0.029983 | -0.121944782 | 0.24437 | -0.14307756  | 0.171765 |
| ANAPC13    | -0.227321769 | 0.030012 | -0.138700508 | 0.181   | 0.071740763  | 0.485701 |
| CLIC2      | -0.681040368 | 0.030028 | 0.159540812  | 0.58681 | -0.265686473 | 0.378921 |
| MSL1       | 0.18678307   | 0.030066 | -0.167989813 | 0.05083 | 0.168351563  | 0.049486 |
| PIAS1      | 0.332444102  | 0.030071 | -0.044669524 | 0.77076 | 0.273320373  | 0.07406  |
| DYNLRB1    | 0.26516294   | 0.030083 | -0.027304141 | 0.82358 | 0.18075364   | 0.13835  |
| PNMT       | -1.227739118 | 0.030125 | -1.007519532 | 0.06642 | -1.042746546 | 0.056686 |
| CEBPZ      | -0.909356123 | 0.030145 | -0.38548857  | 0.35718 | -0.147058059 | 0.725032 |
| KIAA1244   | -0.40170721  | 0.030188 | -0.104807154 | 0.571   | -0.339421418 | 0.066696 |
| IFRD2      | -0.313067069 | 0.030197 | -0.090325231 | 0.52875 | -0.194838635 | 0.175252 |
| MEIS2      | 0.330098588  | 0.030248 | 0.040307307  | 0.79139 | 0.48522311   | 0.001425 |
| ANG        | -0.444387419 | 0.03031  | -0.128381363 | 0.52886 | -0.478653455 | 0.019302 |
| DCHS1      | 0.583264544  | 0.03032  | 0.020558779  | 0.93919 | 0.104261418  | 0.698755 |
| MTMR12     | 0.289481736  | 0.030349 | 0.430337517  | 0.00125 | 0.593539434  | 7.97E-06 |
| NELL1      | -1.366419864 | 0.030346 | -0.464078426 | 0.46175 | -2.155176929 | 0.000656 |
| STX2       | 0.485817672  | 0.030351 | 0.265594856  | 0.23546 | 0.686965425  | 0.002065 |
| STX12      | 0.244586276  | 0.030369 | 0.186750734  | 0.09726 | 0.203216266  | 0.070713 |
| PARM1      | 0.616092913  | 0.030403 | -0.127853537 | 0.65347 | -0.073820156 | 0.795442 |
| PTK2B      | 0.497718865  | 0.030396 | 0.626526555  | 0.00635 | 0.415260142  | 0.07105  |
| TAOK2      | 0.214428125  | 0.03039  | 0.13735364   | 0.16444 | -0.00066396  | 0.994652 |
| DENND2A    | 0.59561931   | 0.030446 | 0.267204352  | 0.33313 | 0.440167617  | 0.109665 |
| PEX26      | 0.369999937  | 0.030445 | 0.170334171  | 0.31891 | -0.080278569 | 0.638518 |
| SEC22B     | -0.192866313 | 0.03043  | -0.004045412 | 0.96356 | -0.08484833  | 0.338223 |
| FGA        | 1.490227778  | 0.030479 | 0.294370234  | 0.66974 | 2.764950732  | 5.82E-05 |
| KMO        | 0.840022275  | 0.030469 | 1.376631725  | 0.00035 | 0.85708182   | 0.02642  |
| RAI2       | 0.89923263   | 0.030474 | -0.40010279  | 0.36568 | 0.456656738  | 0.273785 |
| FLYWCH1    | 0.532554206  | 0.030506 | 0.399524534  | 0.1051  | 0.145024503  | 0.557452 |
| SERTAD1    | 0.443617504  | 0.030515 | 0.523951988  | 0.00991 | 0.372219966  | 0.06782  |
| TRIM56     | 0.242519216  | 0.030531 | 0.094498899  | 0.39895 | 0.198505761  | 0.076447 |
| PRPSAP2    | -0.297162107 | 0.030557 | -0.157249166 | 0.2475  | -0.080623084 | 0.552072 |
| AGA        | -0.437430481 | 0.030591 | -0.028035765 | 0.88829 | 0.023651821  | 0.905537 |
| KIAA0907   | 0.310680071  | 0.030588 | 0.189359201  | 0.18695 | 0.348917509  | 0.014701 |
| STXBP1     | 0.885458205  | 0.030577 | 0.327469902  | 0.42645 | 0.354658622  | 0.388579 |
| EFCAB13    | -0.531553541 | 0.030608 | 0.092927067  | 0.70245 | -0.069769439 | 0.77441  |
| NEGR1      | 0.658863559  | 0.030679 | 0.004765362  | 0.98756 | -0.036888759 | 0.903845 |
| PRR16      | 1.117580001  | 0.030661 | 1.146093029  | 0.02631 | 0.678039684  | 0.191915 |
| SURF4      | 0.220813409  | 0.03065  | 0.15458561   | 0.12934 | 0.103668066  | 0.309053 |
| TRIO       | 0.548682421  | 0.030671 | 0.7147602    | 0.00486 | 0.431570403  | 0.089083 |
| ZW10       | -0.200133124 | 0.030676 | 0.089623633  | 0.32303 | 0.032516777  | 0.718976 |



|           |              |          |              |          |              |          |
|-----------|--------------|----------|--------------|----------|--------------|----------|
| CYP2R1    | -0.420427344 | 0.030807 | -0.296752034 | 0.12454  | -0.271413206 | 0.160321 |
| FAM178B   | 1.407063942  | 0.030897 | 1.121469367  | 0.08674  | 0.149842048  | 0.826918 |
| ATG2A     | 0.314843955  | 0.030943 | 0.262227577  | 0.07231  | 0.166584319  | 0.25415  |
| SAMD14    | 0.514636311  | 0.030942 | -0.173588137 | 0.47431  | 0.330082587  | 0.164181 |
| PTPRG     | 0.4178707    | 0.030965 | 0.189702836  | 0.32718  | 0.474752336  | 0.014102 |
| SNX27     | 0.252880442  | 0.03097  | 0.107004335  | 0.36154  | 0.082242813  | 0.482364 |
| AK4       | -0.37144916  | 0.03101  | -0.158422997 | 0.35741  | -0.378299827 | 0.028012 |
| BTG2      | -0.446823522 | 0.031007 | -0.541373409 | 0.00894  | -0.545610524 | 0.008405 |
| STOX2     | -0.596829971 | 0.031046 | -0.293130483 | 0.28852  | 0.024230368  | 0.93     |
| RNF31     | 0.381034723  | 0.031091 | 0.079641036  | 0.65213  | 0.256331404  | 0.14621  |
| NSUN7     | -0.412448688 | 0.0311   | -0.129015357 | 0.49397  | -0.487692016 | 0.010262 |
| KDM2A     | 0.217258618  | 0.031159 | 0.069985968  | 0.48734  | 0.130874182  | 0.193544 |
| MVD       | 0.469925986  | 0.031166 | 0.18380326   | 0.39972  | 0.201697217  | 0.35545  |
| ZNF665    | -0.41844538  | 0.031202 | -0.064315389 | 0.73661  | -0.058170283 | 0.759548 |
| MAPK14    | -0.214740093 | 0.031226 | -0.09072192  | 0.35999  | -0.160760166 | 0.105003 |
| NR3C1     | 0.441825484  | 0.031228 | 0.396445847  | 0.05308  | 0.209490586  | 0.306985 |
| PPM1N     | -0.727565503 | 0.031221 | -0.147821007 | 0.63895  | 0.039092237  | 0.899651 |
| FAAH      | -0.309095173 | 0.031247 | -0.30829927  | 0.03035  | -0.283876737 | 0.046216 |
| DIAPH3    | -0.355417246 | 0.031291 | -0.142716687 | 0.38196  | 0.092071921  | 0.571493 |
| SLC41A2   | 0.371115732  | 0.031285 | 0.874000624  | 3.44E-07 | 0.377093688  | 0.02822  |
| SPAG1     | 0.678785668  | 0.031295 | 0.650071219  | 0.03832  | 0.270205337  | 0.388628 |
| INRNPA1P2 | 0.721156715  | 0.031319 | 0.440678557  | 0.19159  | 0.625550892  | 0.059511 |
| TRIB1     | 0.384321426  | 0.031325 | 0.024809386  | 0.8896   | 0.077865678  | 0.662757 |
| NCKAP1    | -0.186195789 | 0.031374 | -0.049674081 | 0.56502  | -0.10403681  | 0.228131 |
| AFF2      | 0.995836535  | 0.031394 | 1.331256811  | 0.00385  | 0.505595776  | 0.275747 |
| POLR2L    | 0.303173465  | 0.031411 | 0.151710308  | 0.28138  | -0.081291697 | 0.56523  |
| SLC6A19   | -1.083725052 | 0.031476 | -1.44641856  | 0.00422  | 0.396094999  | 0.416574 |
| STXBP5    | 0.337447106  | 0.03149  | 0.520582391  | 0.00088  | 0.576400916  | 0.000227 |
| ATXN7L3B  | -0.226643247 | 0.031544 | -0.077844505 | 0.45893  | -0.082000261 | 0.435158 |
| GPBAR1    | 0.697732023  | 0.031549 | -0.117170658 | 0.72172  | 0.54012175   | 0.095682 |
| HAS2      | 1.128769799  | 0.031517 | 1.703113743  | 0.00116  | 0.628213604  | 0.231579 |
| RGPD5     | 0.581968349  | 0.031557 | 0.118059609  | 0.66324  | 0.227200366  | 0.401161 |
| SEC31B    | 0.60718458   | 0.031555 | -0.421364617 | 0.14087  | 0.466668262  | 0.098602 |
| SPON1     | 0.883743397  | 0.031545 | 1.084160326  | 0.0083   | 0.738312917  | 0.072384 |
| UPP1      | 0.625342916  | 0.031534 | 0.619703922  | 0.03202  | -0.033242842 | 0.909315 |
| UQCR10    | -0.284774288 | 0.031524 | -0.197444345 | 0.13235  | -0.332621619 | 0.011483 |
| SLC25A6   | 0.266748716  | 0.031569 | 0.001565413  | 0.98993  | -0.09590183  | 0.43953  |
| URAD      | 2.472037673  | 0.0316   | 1.282657445  | 0.27248  | 0.047119951  | 0.969062 |
| ZNF571    | -0.324011285 | 0.031621 | -0.71416322  | 3.21E-06 | -0.274856637 | 0.064393 |
| RANGRF    | -0.32119917  | 0.031664 | -0.257800228 | 0.07836  | -0.329216614 | 0.024227 |
| FAM65A    | 0.609714381  | 0.03171  | -0.181176063 | 0.5298   | 0.071694261  | 0.802901 |
| N4BP2     | -0.227433572 | 0.031705 | -0.143949488 | 0.17315  | -0.076182662 | 0.469978 |
| POLG2     | -0.358638416 | 0.031697 | -0.089030111 | 0.58183  | -0.254856758 | 0.114965 |
| SORCS2    | 1.127057985  | 0.031707 | 0.985197194  | 0.06065  | 0.354308178  | 0.502442 |
| ANGPT4    | -1.074463499 | 0.031754 | -0.99863066  | 0.04545  | -2.0553872   | 4.67E-05 |
| PIAS2     | 0.222701567  | 0.031752 | 0.201452396  | 0.05157  | 0.103675638  | 0.316601 |
| PRR15     | -0.365479572 | 0.031763 | -0.222352171 | 0.18852  | -0.626802949 | 0.000243 |

|             |              |          |              |         |              |          |
|-------------|--------------|----------|--------------|---------|--------------|----------|
| OSBPL9      | -0.238261198 | 0.031789 | -0.038159488 | 0.73028 | 0.051676602  | 0.640211 |
| CLPP        | 0.344579673  | 0.031813 | 0.262567904  | 0.10066 | 0.058546573  | 0.71538  |
| BACH2       | 1.302994475  | 0.031867 | 1.106859569  | 0.06751 | 0.440716812  | 0.468935 |
| P11-1212A22 | 0.528775289  | 0.031863 | 0.168638305  | 0.49821 | -0.351577398 | 0.159854 |
| RAB33A      | 0.883042716  | 0.031907 | 0.167980013  | 0.6924  | 0.369333566  | 0.376594 |
| LARP4B      | 0.258891321  | 0.031971 | 0.060788655  | 0.61423 | 0.063501567  | 0.598098 |
| MB21D2      | -0.327819798 | 0.031974 | -0.249735494 | 0.09814 | -0.008927414 | 0.952291 |
| ATP5D       | 0.77078905   | 0.032059 | 0.165232616  | 0.64817 | 0.045480708  | 0.900041 |
| KMT2B       | 0.44225366   | 0.032109 | -0.078981882 | 0.70276 | 0.184163571  | 0.373162 |
| EPN3        | -0.672966311 | 0.032172 | -0.591463407 | 0.0588  | -0.992304701 | 0.001689 |
| ORMDL3      | -0.295739981 | 0.03221  | 0.048785827  | 0.72195 | -0.152556641 | 0.267257 |
| PELI1       | 0.297410075  | 0.032213 | 0.477171118  | 0.00057 | 0.492444943  | 0.000375 |
| RSPH9       | 0.512641316  | 0.032241 | 0.329516896  | 0.16908 | 0.415979566  | 0.07925  |
| ZDHHC11     | -0.742174061 | 0.032282 | -0.755834051 | 0.02812 | -0.149152451 | 0.659977 |
| MT-ND4L     | 0.658356848  | 0.032323 | 0.398758865  | 0.1949  | 0.267480615  | 0.384682 |
| MDH2        | 0.281562439  | 0.032332 | -0.081143949 | 0.53738 | -0.074266458 | 0.572111 |
| EFEMP2      | 0.401843304  | 0.032395 | 0.187581007  | 0.31819 | 0.346725482  | 0.064792 |
| GPRC5C      | 0.357639556  | 0.032409 | 0.228328234  | 0.17194 | 0.225777529  | 0.176609 |
| VPS9D1      | 0.498622477  | 0.032425 | 0.013551967  | 0.95382 | 0.106797128  | 0.652213 |
| BRMS1       | -0.239224713 | 0.032444 | -0.053279086 | 0.62649 | 0.038861611  | 0.721433 |
| 2-Mar       | -0.477915767 | 0.03244  | -0.470069451 | 0.03474 | -0.703548063 | 0.001824 |
| KIF18A      | -0.288967879 | 0.032466 | -0.030800035 | 0.81778 | 0.146642391  | 0.270071 |
| MTMR9       | 0.256471796  | 0.032478 | 0.180252076  | 0.13117 | 0.421494666  | 0.000391 |
| PCDH18      | 0.464897778  | 0.032518 | 0.114243957  | 0.59935 | 0.698517548  | 0.001312 |
| VASN        | 0.638546056  | 0.03252  | 0.280450096  | 0.34921 | -0.161418076 | 0.593146 |
| ZXDC        | 0.214998619  | 0.032525 | 0.192152299  | 0.05375 | 0.124245495  | 0.212536 |
| BOK         | 0.575632554  | 0.032557 | 0.354788339  | 0.18788 | 0.1729571    | 0.521649 |
| ACTR2       | 0.156851566  | 0.032591 | 0.269001244  | 0.00024 | 0.113346725  | 0.121614 |
| ELL2        | 0.420198962  | 0.032586 | 0.006692727  | 0.97284 | 0.485910036  | 0.013309 |
| NSFL1C      | 0.203086876  | 0.032583 | 0.275605783  | 0.00364 | 0.253136074  | 0.00749  |
| SYNDIG1     | 1.24284013   | 0.032594 | 1.315546302  | 0.02368 | 1.158483873  | 0.04521  |
| GINM1       | -0.20455235  | 0.032612 | -0.053974885 | 0.56593 | -0.148158437 | 0.11591  |
| ACPP        | 0.518396166  | 0.032628 | 0.48034721   | 0.04678 | 0.504425322  | 0.036429 |
| GRB10       | 0.482366494  | 0.032665 | 0.670882422  | 0.00292 | 0.386786583  | 0.086593 |
| GRAMD1C     | -0.566072913 | 0.032694 | 0.077026182  | 0.75838 | -0.569062505 | 0.033313 |
| SLC22A18    | 0.682008162  | 0.032699 | 0.007373866  | 0.98167 | -0.096378112 | 0.763968 |
| PDPK1       | 0.292743248  | 0.03272  | 0.445699552  | 0.00112 | 0.40750704   | 0.002895 |
| DDX47       | -0.192048376 | 0.032762 | -0.109155265 | 0.22147 | 0.004556971  | 0.959112 |
| LRRC4B      | 0.851322057  | 0.032756 | -0.039577631 | 0.92184 | 0.156810299  | 0.695659 |
| TXNL4A      | -0.238140129 | 0.032755 | 0.003935517  | 0.97154 | -0.045660612 | 0.679086 |
| SLC25A13    | -0.270406846 | 0.032775 | -0.18377263  | 0.14544 | -0.202806483 | 0.107833 |
| FAHD2B      | -0.565060924 | 0.03283  | -0.362327149 | 0.16194 | -0.211193192 | 0.41292  |
| SERPINE1    | 1.138515117  | 0.032833 | 1.514894999  | 0.00446 | 0.51086323   | 0.338965 |
| TM4SF1      | -0.39957549  | 0.032844 | -0.181898832 | 0.3311  | -0.250504171 | 0.18075  |
| ATG9B       | 1.049784956  | 0.032876 | -0.761562884 | 0.14759 | 0.52796487   | 0.286682 |
| RECQL5      | 0.298412567  | 0.032894 | -0.04083862  | 0.76833 | 0.266682439  | 0.054533 |
| TNFRSF12A   | 0.466846876  | 0.032911 | 0.498705956  | 0.02232 | 0.240805842  | 0.27059  |

|            |              |          |              |         |              |          |
|------------|--------------|----------|--------------|---------|--------------|----------|
| ARRDC3     | 0.672337292  | 0.032988 | 0.720917847  | 0.02222 | 0.631350719  | 0.045233 |
| SEN2       | -0.334786615 | 0.032993 | -0.036359295 | 0.81645 | 0.155460264  | 0.320125 |
| TCF12      | 0.296343206  | 0.033008 | -0.09927464  | 0.47511 | 0.164538677  | 0.23592  |
| FAM73A     | -0.251755999 | 0.033054 | 0.085837038  | 0.46038 | 0.043840704  | 0.706339 |
| STK11IP    | 0.324785285  | 0.03305  | 0.325071324  | 0.03136 | 0.132015639  | 0.383017 |
| DPM1       | -0.182101836 | 0.033119 | -0.012170589 | 0.88451 | -0.026060168 | 0.755312 |
| PCYOX1L    | -0.329282517 | 0.033137 | -0.447105488 | 0.00367 | -0.293930285 | 0.054457 |
| P11-423H2. | -0.332321456 | 0.033127 | -0.114471244 | 0.45134 | -0.274258581 | 0.072659 |
| TUBA1C     | 0.331718225  | 0.033129 | 0.369217868  | 0.01768 | 0.492454603  | 0.001551 |
| CAPRIN1    | 0.14940367   | 0.033178 | 0.150257682  | 0.03193 | 0.188523395  | 0.007086 |
| IRF7       | 0.737200753  | 0.0332   | 0.060027698  | 0.86424 | 0.095401184  | 0.788022 |
| NCKIPSD    | 0.406026829  | 0.033205 | 0.212683609  | 0.26432 | 0.250668018  | 0.1889   |
| ADAM28     | -0.431919966 | 0.033257 | -0.0213648   | 0.91605 | -0.488744454 | 0.015949 |
| KIAA0825   | -0.395760132 | 0.03325  | 0.106222122  | 0.55491 | -0.156304801 | 0.390712 |
| P11-551L14 | 1.043491794  | 0.033289 | 0.067055342  | 0.89198 | 1.008779716  | 0.039405 |
| T6GALNAC   | -0.38656903  | 0.033287 | -0.476196375 | 0.00861 | -0.658377087 | 0.000282 |
| COBL       | -0.488676094 | 0.033311 | -0.602835335 | 0.00864 | -0.313453674 | 0.170672 |
| CNKSR2     | 1.436616351  | 0.033344 | 1.890441386  | 0.00448 | 1.037680704  | 0.123671 |
| SSXP10     | -0.552693535 | 0.033393 | -0.78887489  | 0.00241 | -0.615809049 | 0.017472 |
| FDFT1      | 0.313555762  | 0.033405 | 0.116508558  | 0.42933 | 0.20107257   | 0.172415 |
| DNAJC25    | -0.331549303 | 0.033433 | 0.00049633   | 0.99741 | -0.096117299 | 0.53043  |
| YS1-DBNDC  | 2.855572198  | 0.033445 | 0.428748943  | 0.76834 | 2.650316237  | 0.049991 |
| INPPL1     | 0.25760045   | 0.033463 | 0.19550775   | 0.10638 | 0.308036109  | 0.01092  |
| DNAJC2     | -0.241618738 | 0.033474 | -0.120990713 | 0.28346 | 0.13774183   | 0.218994 |
| CREB3      | 0.217399935  | 0.03353  | 0.392160479  | 0.0001  | 0.290694299  | 0.004068 |
| INSL6      | 0.987939572  | 0.033545 | 1.084361727  | 0.01834 | 0.386570161  | 0.414801 |
| LTBP3      | 0.498719409  | 0.033536 | 0.284362442  | 0.22568 | 0.247502801  | 0.292667 |
| VRK3       | 0.256050007  | 0.033548 | 0.146305682  | 0.22322 | 0.22278728   | 0.06248  |
| ZC3H4      | 0.374035758  | 0.033537 | 0.118032787  | 0.50231 | 0.049230663  | 0.779675 |
| ADRA2C     | -0.893056118 | 0.03364  | 0.042925524  | 0.91657 | -1.152375666 | 0.006131 |
| ZMYND8     | 0.37023926   | 0.033647 | 0.190302444  | 0.27507 | 0.277602399  | 0.111212 |
| ELP3       | -0.290072725 | 0.033659 | -0.105089544 | 0.43852 | -0.139977528 | 0.302076 |
| DMWD       | 0.301931668  | 0.033679 | 0.093730909  | 0.51234 | 0.117354912  | 0.411499 |
| OST4       | 0.274338435  | 0.033705 | 0.214244825  | 0.09683 | 0.179633361  | 0.163844 |
| MRPS34     | -0.326487441 | 0.033726 | -0.192169563 | 0.20655 | -0.481159321 | 0.001699 |
| ZNF239     | -0.386985114 | 0.033733 | -0.072514296 | 0.684   | 0.004174264  | 0.981183 |
| RIOK2      | -0.240145832 | 0.033745 | -0.08770752  | 0.43173 | 0.040930118  | 0.712737 |
| APOBEC3A   | 1.565386932  | 0.033779 | 1.177981145  | 0.11318 | 1.541649918  | 0.03518  |
| PALM3      | -0.691211544 | 0.03379  | -0.955778486 | 0.00347 | -1.050695161 | 0.001566 |
| SYT11      | 0.598331734  | 0.033785 | 0.480417812  | 0.08795 | 0.571970226  | 0.041745 |
| CCDC169    | -0.567580326 | 0.033813 | -0.266887669 | 0.3133  | -0.963729574 | 0.000341 |
| FOXG1      | 2.302096281  | 0.033876 | 1.34069446   | 0.22084 | 0.04375602   | 0.969037 |
| PCMTD1     | -0.232155381 | 0.033903 | -0.051047643 | 0.6389  | -0.137995699 | 0.204877 |
| VIL1       | -0.535612708 | 0.033953 | -0.500381435 | 0.04752 | -0.579798807 | 0.021663 |
| TCEAL8     | -0.178967447 | 0.034067 | 0.094908409  | 0.25542 | 0.097179687  | 0.243701 |
| ERCC4      | -0.369519562 | 0.034115 | -0.436006354 | 0.01212 | -0.064989951 | 0.70765  |
| CTSH       | -0.423799834 | 0.034142 | -0.298223822 | 0.13545 | -0.509165007 | 0.010849 |

|             |              |          |              |          |              |          |
|-------------|--------------|----------|--------------|----------|--------------|----------|
| RBM22P2     | 0.960321298  | 0.034182 | 0.302151955  | 0.51377  | 0.118352933  | 0.799381 |
| TAS2R14     | -0.682483921 | 0.03425  | -0.088291896 | 0.77389  | -0.419062511 | 0.179037 |
| HSD11B2     | -0.838291707 | 0.034264 | -0.486131799 | 0.21708  | -1.279264394 | 0.001418 |
| P11-113I24. | -0.497177373 | 0.034292 | -0.284293407 | 0.21067  | -0.535772814 | 0.020209 |
| APRT        | -0.344831634 | 0.034324 | -0.117476589 | 0.46793  | -0.394539423 | 0.015201 |
| POLDIP3     | 0.173741034  | 0.034328 | 0.018952032  | 0.81667  | 0.108887404  | 0.181765 |
| CCDC88C     | -0.429141826 | 0.034414 | -0.171864557 | 0.39618  | -0.293196402 | 0.147619 |
| CDIP1       | 0.502153963  | 0.034406 | 0.295861415  | 0.2125   | 0.4689768    | 0.04711  |
| GALNT6      | -0.654819384 | 0.034413 | -0.214756941 | 0.48663  | -1.143054161 | 0.000223 |
| PTMS        | 0.356903604  | 0.03439  | -0.203724035 | 0.22851  | 0.105376937  | 0.532326 |
| TMEM9       | -0.21322697  | 0.034467 | -0.410269865 | 4.80E-05 | -0.227343198 | 0.023095 |
| PDCL        | -0.242489697 | 0.034479 | -0.198475546 | 0.07921  | 0.09811473   | 0.382601 |
| SLC45A3     | -0.500391042 | 0.034539 | -0.265402162 | 0.2574   | -0.92330489  | 0.000102 |
| SEC23B      | 0.27579906   | 0.034593 | 0.266972675  | 0.04029  | 0.224613855  | 0.084458 |
| MPRIP       | 0.281524708  | 0.034622 | 0.277127687  | 0.03741  | 0.213421265  | 0.108921 |
| PRKAB2      | -0.357272386 | 0.034678 | -0.499367764 | 0.00311  | -0.118741851 | 0.480648 |
| MAPK6       | 0.179245881  | 0.034689 | 0.13260888   | 0.11771  | 0.403148671  | 1.78E-06 |
| GNAS        | 0.165880727  | 0.034732 | -0.048827065 | 0.5343   | 0.126667326  | 0.106704 |
| IL7R        | 0.64113924   | 0.034737 | 0.462747519  | 0.12674  | 0.030427374  | 0.920599 |
| ITGA2       | 0.592737368  | 0.034725 | 0.801477046  | 0.00428  | 0.268499116  | 0.338881 |
| SYTL2       | -0.470965432 | 0.03474  | -0.115194307 | 0.60494  | -0.468877239 | 0.035406 |
| TACC2       | 0.419200909  | 0.034801 | -0.028135869 | 0.88749  | 0.00159804   | 0.993582 |
| KLRF2       | -1.274043134 | 0.034832 | -1.168817492 | 0.04882  | -0.920169308 | 0.115005 |
| KIAA1143    | -0.337101072 | 0.034841 | -0.162021783 | 0.30818  | -0.143781059 | 0.36508  |
| KDM1A       | -0.157019322 | 0.034859 | -0.059190845 | 0.42386  | 0.077062148  | 0.297008 |
| NDE1        | 0.303063737  | 0.034954 | 0.250515011  | 0.0806   | 0.159310972  | 0.265766 |
| NSMAF       | -0.243128242 | 0.034976 | -0.041558116 | 0.7153   | -0.113096407 | 0.320823 |
| GUCY1A3     | 0.751751127  | 0.034988 | 0.461519714  | 0.19553  | 0.70601581   | 0.047613 |
| CHPT1       | -0.440791023 | 0.035003 | -0.416129737 | 0.04613  | -0.427355226 | 0.04031  |
| ASAH2       | 0.801589877  | 0.035026 | 0.275654815  | 0.46908  | 0.092383987  | 0.808164 |
| PIGR        | -1.940608163 | 0.035114 | -0.996858981 | 0.27878  | -1.902630732 | 0.038826 |
| SCMH1       | 0.262199151  | 0.03513  | 0.003235472  | 0.97936  | 0.047608723  | 0.701164 |
| SLC8A3      | 0.720805548  | 0.035182 | -0.12964182  | 0.70699  | 0.741192205  | 0.029952 |
| KDM5C       | 0.17195814   | 0.03523  | 0.046875909  | 0.5658   | 0.088867114  | 0.276159 |
| RAB3C       | -1.433580848 | 0.035221 | 0.669502756  | 0.31518  | -1.179557368 | 0.082449 |
| RPS3AP44    | -0.878834093 | 0.035208 | 0.037534595  | 0.92165  | -0.286409133 | 0.46064  |
| ZNF621      | 0.246218443  | 0.035219 | -0.009695455 | 0.9338   | 0.184370529  | 0.112409 |
| NISCH       | 0.293465539  | 0.035247 | -0.034796012 | 0.80322  | 0.163714308  | 0.240208 |
| KIF13A      | -0.264633218 | 0.035268 | -0.176998028 | 0.15767  | -0.133719125 | 0.284825 |
| PBXIP1      | -0.358231394 | 0.035288 | -0.161753113 | 0.33973  | -0.43339228  | 0.010703 |
| PCP4L1      | 1.254249431  | 0.035283 | 0.114549842  | 0.85452  | 0.692077514  | 0.251603 |
| KMT2A       | 0.358477582  | 0.035323 | -0.008071284 | 0.96224  | 0.189086428  | 0.266797 |
| C12orf68    | 0.967935817  | 0.035346 | -0.059242193 | 0.90085  | 0.323797183  | 0.487491 |
| SEL1L3      | -0.392337101 | 0.035372 | -0.284660357 | 0.12637  | -0.12585799  | 0.499023 |
| TMUB1       | 0.376187757  | 0.035364 | -0.032034031 | 0.85839  | -0.183930876 | 0.306742 |
| ASIC2       | -1.187156574 | 0.035385 | -2.3799794   | 8.50E-05 | -0.807118567 | 0.143055 |
| SYNE2       | -0.404550738 | 0.035393 | -0.243564965 | 0.20495  | -0.413316724 | 0.031505 |

|          |              |          |              |         |              |          |
|----------|--------------|----------|--------------|---------|--------------|----------|
| IDO2     | 0.743184169  | 0.035443 | 0.480450083  | 0.1769  | 0.717161517  | 0.039494 |
| TYW5     | -0.196216376 | 0.035452 | -0.053913898 | 0.55725 | 0.015489962  | 0.865128 |
| CTC1     | 0.412019819  | 0.035465 | 0.266620703  | 0.17132 | 0.406149208  | 0.036837 |
| EXOSC7   | -0.302658051 | 0.035506 | -0.244909455 | 0.08556 | -0.166304621 | 0.241849 |
| PAICS    | -0.290384975 | 0.035583 | -0.307530335 | 0.02595 | -0.250588381 | 0.069495 |
| CDC25B   | 0.476519917  | 0.035635 | 0.061737294  | 0.78563 | 0.126819313  | 0.576328 |
| YPEL5    | 0.256116058  | 0.035628 | 0.26711486   | 0.02762 | 0.368856806  | 0.00231  |
| RILPL2   | 0.334924216  | 0.035649 | 0.253954655  | 0.10997 | 0.170913061  | 0.282518 |
| CDKN2B   | 0.733720187  | 0.035686 | 1.049458312  | 0.00259 | 0.317857     | 0.362787 |
| COQ5     | -0.205577405 | 0.035734 | -0.090904317 | 0.34006 | -0.113277026 | 0.236906 |
| TOM1L1   | -0.332947768 | 0.035741 | -0.238675241 | 0.12946 | -0.238506911 | 0.129996 |
| RNASE1   | -0.703562932 | 0.035799 | -0.350938049 | 0.29437 | -1.428804145 | 2.08E-05 |
| CCDC43   | -0.238129908 | 0.035851 | -0.145050884 | 0.19671 | -0.046152335 | 0.679936 |
| SCARF1   | 0.734730805  | 0.035941 | 0.309453861  | 0.3851  | 0.398886109  | 0.273353 |
| ANXA1    | 0.611817696  | 0.035981 | 0.121955903  | 0.676   | 0.609299702  | 0.036712 |
| ZNF451   | -0.243481254 | 0.036004 | -0.182521471 | 0.11485 | -0.062920996 | 0.586496 |
| TSTD1    | -0.346195429 | 0.036014 | -0.016481162 | 0.9181  | -0.329645187 | 0.042502 |
| NR5A2    | 0.521170017  | 0.036077 | 0.446052278  | 0.07255 | 0.480933757  | 0.05282  |
| DDB2     | -0.536056894 | 0.036094 | -0.275316425 | 0.27884 | -0.714696162 | 0.005191 |
| NR4A3    | 1.768552411  | 0.036167 | 1.76604486   | 0.03599 | 1.144378905  | 0.177249 |
| PNRC2    | -0.146769246 | 0.036179 | -0.103900981 | 0.13693 | 0.015193946  | 0.827377 |
| CNN2P1   | 0.901058935  | 0.036208 | -0.010902753 | 0.98097 | -0.283312545 | 0.543767 |
| UPK1B    | -0.530575267 | 0.036242 | -0.437995637 | 0.08376 | -0.141274178 | 0.576908 |
| BLM      | -0.465904302 | 0.036263 | -0.412679642 | 0.0628  | -0.043673875 | 0.843677 |
| TATDN3   | -0.274591652 | 0.036257 | -0.095280995 | 0.44731 | 0.023007466  | 0.85331  |
| BPIFB1   | -1.36242821  | 0.036307 | -1.048694649 | 0.10689 | -1.856531977 | 0.004346 |
| SLC2A3   | 0.613260816  | 0.036405 | 0.078736952  | 0.78828 | -0.066368372 | 0.820943 |
| LNPEP    | -0.178479344 | 0.036437 | -0.267194693 | 0.0017  | -0.168672213 | 0.047303 |
| SEPSECS  | -0.364139786 | 0.036444 | -0.02844164  | 0.86866 | -0.442264467 | 0.010323 |
| METAP1D  | -0.548396989 | 0.036536 | -0.380709543 | 0.13806 | -0.385611982 | 0.133272 |
| CHCHD7   | -0.251822532 | 0.036569 | -0.119037118 | 0.31857 | -0.024506304 | 0.836621 |
| ABCG2    | 1.064381895  | 0.036637 | 0.852933238  | 0.09184 | 1.546546869  | 0.002149 |
| MTRNR2L1 | -0.561685876 | 0.036649 | 0.150446362  | 0.57441 | 0.039183355  | 0.883737 |
| SLC17A7  | 0.894995684  | 0.036665 | 0.453827766  | 0.29746 | 0.308280404  | 0.481125 |
| YBX2     | 0.797974491  | 0.036662 | 0.202188906  | 0.6009  | 0.623644849  | 0.10285  |
| LYPLA2   | 0.206035833  | 0.036822 | 0.035446969  | 0.7186  | 0.116150733  | 0.236838 |
| PLEC     | 0.445008881  | 0.036844 | 0.400494724  | 0.0603  | 0.049852304  | 0.815199 |
| TMEM200C | 0.781305676  | 0.036891 | 0.679757026  | 0.06889 | 0.084142767  | 0.822294 |
| PPP1R13B | 0.336846215  | 0.036917 | 0.126419748  | 0.4333  | 0.019886094  | 0.901822 |
| PKP3     | -0.335018701 | 0.036978 | -0.062769773 | 0.69492 | -0.199982144 | 0.212705 |
| GTPBP10  | -0.283864826 | 0.037094 | -0.127597191 | 0.34335 | -0.104256618 | 0.438514 |
| CD320    | -0.446948153 | 0.037132 | -0.397351044 | 0.06246 | -0.580925659 | 0.006607 |
| ZDHHC9   | 0.247791429  | 0.037172 | -0.085922679 | 0.47105 | -0.136089319 | 0.254096 |
| TBL1X    | 0.257619635  | 0.037194 | 0.050035863  | 0.68593 | 0.043916479  | 0.722329 |
| NUDT8    | -0.579918507 | 0.037237 | -0.158495901 | 0.55701 | -0.821186547 | 0.002909 |
| RHOC     | 0.273371954  | 0.037229 | 0.227697323  | 0.08247 | 0.198173     | 0.130732 |
| HIST1H1E | -0.341994963 | 0.037249 | -0.129197816 | 0.43077 | -0.042491998 | 0.795472 |

|            |              |          |              |          |              |          |
|------------|--------------|----------|--------------|----------|--------------|----------|
| HDAC8      | -0.420545266 | 0.037261 | -0.194490648 | 0.33155  | -0.04818393  | 0.808957 |
| FOXK1      | 0.33219026   | 0.037329 | 0.04027492   | 0.80077  | -0.065233133 | 0.682761 |
| DTX2P1     | 0.560779024  | 0.037371 | 0.344186365  | 0.20201  | 0.382046703  | 0.155185 |
| LCT        | 1.811890433  | 0.037396 | 1.131694209  | 0.19714  | 0.630319724  | 0.476891 |
| HEPACAM    | -0.924226817 | 0.037408 | 0.220052957  | 0.60023  | -0.381998918 | 0.374063 |
| VDAC1      | -0.186441082 | 0.037423 | 0.033189734  | 0.71048  | -0.028976222 | 0.745945 |
| FUBP1      | -0.160420857 | 0.037488 | -0.1662754   | 0.03063  | 0.14984374   | 0.050585 |
| GDI2       | -0.158361605 | 0.037487 | -0.041356658 | 0.58597  | 0.047243652  | 0.53359  |
| PHLDB1     | 0.451842214  | 0.037513 | 0.462854736  | 0.03295  | 0.156669256  | 0.470777 |
| MTND4P23   | 1.373261372  | 0.037633 | 1.672857673  | 0.00907  | 1.867059493  | 0.003154 |
| NAB2       | 0.444392799  | 0.037685 | 0.206583158  | 0.33406  | 0.318498286  | 0.136049 |
| SEZ6       | 1.214135458  | 0.037688 | 1.117268071  | 0.05668  | 0.549005763  | 0.34327  |
| ABCB7      | -0.345298774 | 0.037705 | -0.106098204 | 0.51884  | -0.149682795 | 0.361733 |
| TMEM200B   | 0.699308002  | 0.037773 | 0.120465809  | 0.72282  | 0.580121333  | 0.084179 |
| RAVER2     | -0.227485993 | 0.037809 | -0.061245195 | 0.57303  | -0.218938763 | 0.044363 |
| EIF3H      | -0.395696161 | 0.037878 | -0.26297629  | 0.16622  | -0.270291108 | 0.154031 |
| C15orf57   | 0.199370628  | 0.037921 | 0.227369615  | 0.01733  | 0.109981334  | 0.25025  |
| CCDC174    | -0.287635006 | 0.037909 | -0.289595026 | 0.03486  | 0.050771268  | 0.709276 |
| MFN1       | -0.209070825 | 0.037918 | -0.032030215 | 0.74852  | 0.024356826  | 0.807267 |
| SLC15A2    | -0.756284405 | 0.037909 | -0.060515172 | 0.86521  | -0.870567749 | 0.015966 |
| SNAPC4     | 0.342992759  | 0.037956 | 0.168500018  | 0.30783  | 0.159285608  | 0.334023 |
| PSMD12     | 0.227596348  | 0.037986 | 0.192445136  | 0.07838  | 0.333679364  | 0.002226 |
| NCAPG      | -0.386070323 | 0.038002 | -0.104827815 | 0.57164  | 0.141925196  | 0.443245 |
| BTF3L4P2   | -0.339716613 | 0.03803  | -0.119326856 | 0.45707  | -0.05207214  | 0.744215 |
| POC1A      | -0.395369941 | 0.038034 | -0.116423386 | 0.53259  | -0.188517811 | 0.312362 |
| CDKN1C     | -0.392745717 | 0.038066 | -0.796987626 | 2.74E-05 | -0.740199644 | 9.59E-05 |
| KCNK5      | -0.502927609 | 0.038058 | 0.012240755  | 0.95954  | -0.980677708 | 5.45E-05 |
| PPA1       | -0.228329776 | 0.03805  | -0.000874017 | 0.99364  | 0.039874635  | 0.715853 |
| SNRPG      | -0.249034747 | 0.038115 | 0.061020214  | 0.60798  | 0.094777039  | 0.425233 |
| VMAC       | -0.440837201 | 0.038114 | -0.384316343 | 0.0651   | -0.334110494 | 0.105563 |
| ANKK1      | 1.513706537  | 0.038172 | 0.991618073  | 0.16947  | 0.988566669  | 0.173764 |
| P11-632K20 | -0.428239664 | 0.038175 | -0.028536882 | 0.88898  | -0.410643825 | 0.045887 |
| DOCK5      | 0.465904919  | 0.038186 | 0.223164139  | 0.32073  | 0.373356303  | 0.096428 |
| MOB2       | 1.019672165  | 0.038194 | 0.488593136  | 0.32256  | 0.89539233   | 0.068219 |
| HEATR5A    | 0.355525686  | 0.038215 | 0.738721557  | 1.54E-05 | 0.354147751  | 0.038562 |
| KLHL21     | -0.384549235 | 0.038286 | 0.105220609  | 0.56645  | -0.266501149 | 0.147337 |
| AGTR1      | -0.686676276 | 0.038302 | -0.57222995  | 0.08422  | -0.55331245  | 0.094989 |
| CAP2       | 0.584851729  | 0.038307 | -0.445850834 | 0.13304  | 0.575202765  | 0.038926 |
| ANKRD37    | -1.046962644 | 0.038381 | -1.813739991 | 0.00034  | -0.916356004 | 0.069392 |
| FAM163A    | 0.980655953  | 0.03839  | 0.358460311  | 0.45918  | 0.273379845  | 0.572962 |
| SLC7A7     | 0.528117517  | 0.03838  | 0.594369301  | 0.01963  | 0.245146149  | 0.336974 |
| APITD1     | -0.363104988 | 0.038413 | -0.009308617 | 0.95605  | -0.253553871 | 0.138999 |
| C20orf27   | -0.364699713 | 0.03845  | -0.3579589   | 0.04029  | -0.789119076 | 9.28E-06 |
| GCSHP5     | -0.934503932 | 0.038518 | 0.011677708  | 0.97856  | -0.813913856 | 0.067287 |
| LCORL      | -0.294845607 | 0.038512 | -0.115975262 | 0.41224  | -0.152784696 | 0.279072 |
| TSNARE1    | 0.433919678  | 0.038522 | 0.071199456  | 0.73218  | -0.046218761 | 0.826703 |
| CPHL1P     | 0.694806976  | 0.038602 | 1.200350415  | 0.00032  | 0.25720304   | 0.444158 |

|             |              |          |              |         |              |          |
|-------------|--------------|----------|--------------|---------|--------------|----------|
| LPP         | 0.619130966  | 0.038676 | 0.080348536  | 0.78871 | 0.330123062  | 0.26991  |
| C2CD2L      | 0.478711262  | 0.038767 | 0.243280371  | 0.29423 | -0.010513051 | 0.963745 |
| CXCL17      | -1.297611816 | 0.038774 | -0.341621213 | 0.58143 | -1.820095728 | 0.003924 |
| SUCLG1      | -0.278555386 | 0.038759 | -0.076308541 | 0.56914 | -0.205100278 | 0.126135 |
| ZNF205      | -0.7188951   | 0.038764 | -0.079781843 | 0.81637 | -0.043999939 | 0.898214 |
| ATP11A      | 0.4014912    | 0.038792 | 0.36124443   | 0.06311 | 0.45885781   | 0.018145 |
| RHPN1       | -0.551818557 | 0.038799 | -0.286289551 | 0.27834 | -0.805858256 | 0.002486 |
| NPC1        | 0.252009442  | 0.038811 | 0.110757464  | 0.36348 | 0.149846645  | 0.21765  |
| APOL2       | 0.567701273  | 0.038822 | 0.692277374  | 0.01159 | 0.686080344  | 0.012301 |
| APEX2       | 0.240976768  | 0.038858 | 0.196962494  | 0.09017 | 0.289821559  | 0.012165 |
| MRPS35      | -0.274361536 | 0.03886  | -0.123988325 | 0.34833 | -0.12662256  | 0.338021 |
| EVI5L       | 0.44096746   | 0.038927 | 0.290650509  | 0.17376 | 0.278884037  | 0.191499 |
| PRKAG1      | -0.171791315 | 0.03897  | 0.006593817  | 0.93595 | -0.063920308 | 0.43578  |
| NDUFAF4     | -0.278784725 | 0.039002 | -0.3141672   | 0.01927 | -0.12327765  | 0.35017  |
| NRARP       | 0.710515916  | 0.038992 | 0.899536935  | 0.00816 | 0.243155524  | 0.483881 |
| ACSF2       | -0.25686606  | 0.039049 | -0.420657254 | 0.0007  | -0.274571468 | 0.026054 |
| CEP128      | -0.45998018  | 0.039042 | -0.36527476  | 0.09967 | -0.146120764 | 0.506686 |
| TPTE2P6     | 0.8355159    | 0.039041 | 0.4740786    | 0.24767 | 0.4844449485 | 0.235589 |
| CEP192      | -0.206165744 | 0.039072 | 0.051792893  | 0.60076 | -0.010920887 | 0.912164 |
| VKORC1L1    | -0.262311886 | 0.039076 | -0.080800901 | 0.52325 | -0.047464812 | 0.707655 |
| RRS1        | -0.424390632 | 0.039105 | -0.207648526 | 0.30656 | -0.37370244  | 0.066645 |
| KLRK1       | 0.671845046  | 0.03912  | 0.760349431  | 0.01839 | 0.543507408  | 0.093602 |
| MAPT        | 0.98496158   | 0.039206 | 0.813475937  | 0.08765 | 1.001618102  | 0.033924 |
| SNX15       | 0.384600831  | 0.039226 | 0.287529371  | 0.1231  | 0.0018565    | 0.992051 |
| KITLG       | -0.380045129 | 0.039267 | -0.346800066 | 0.05963 | 0.209007354  | 0.255166 |
| FANCG       | -0.403990098 | 0.0393   | -0.154953114 | 0.42501 | -0.144976625 | 0.454646 |
| ATP6V0E1P   | 1.17882517   | 0.039386 | 0.975206638  | 0.08887 | 0.35448851   | 0.551469 |
| CTC-479C5.1 | 0.566872156  | 0.039394 | 0.130904532  | 0.63698 | 0.220536456  | 0.421292 |
| FUZ         | -0.47110288  | 0.039387 | -0.067329074 | 0.7637  | -0.141650898 | 0.532876 |
| GSTM3       | -0.288897165 | 0.039384 | 0.132334507  | 0.34239 | -0.119112378 | 0.393515 |
| RNF166      | 0.54375438   | 0.039374 | 0.512582353  | 0.05222 | 0.070854656  | 0.788724 |
| CRAT        | 0.340748094  | 0.039409 | 0.110395574  | 0.50545 | -0.08221276  | 0.620762 |
| LGALS3BP    | -0.331468295 | 0.03942  | -0.347402024 | 0.03082 | -0.632163478 | 8.56E-05 |
| HOXB8       | 1.127575876  | 0.039472 | -0.325029819 | 0.58688 | 0.388439928  | 0.485037 |
| LAMC3       | 1.176313254  | 0.039484 | 0.569577687  | 0.31913 | 0.254943271  | 0.656488 |
| CYP11A1     | -1.542803279 | 0.039585 | -0.370082257 | 0.5823  | -0.178559748 | 0.790554 |
| KCTD19      | -1.570765556 | 0.03962  | -0.368745693 | 0.62027 | -0.591423988 | 0.42151  |
| MKKS        | -0.279673075 | 0.039668 | 0.026067912  | 0.84658 | 0.114039944  | 0.396649 |
| ADAM12      | 1.422348922  | 0.039743 | 2.086880281  | 0.00252 | 0.431750085  | 0.53298  |
| ARHGAP39    | 0.553872741  | 0.03973  | 0.250637035  | 0.35489 | 0.558168815  | 0.040021 |
| DDX55       | -0.262271576 | 0.039735 | -0.131420765 | 0.29594 | -0.026464298 | 0.832984 |
| TWF1        | -0.19583488  | 0.039724 | 0.145304323  | 0.12573 | -0.096543789 | 0.309568 |
| TUBGCP6     | 0.316754662  | 0.039756 | 0.221842262  | 0.14937 | 0.321906746  | 0.036459 |
| AGTPBP1     | -0.301027822 | 0.039809 | -0.161783653 | 0.26619 | -0.132114762 | 0.363517 |
| DPP10       | 0.499273671  | 0.039804 | -0.165198306 | 0.49831 | 0.495230834  | 0.040981 |
| SGOL2       | -0.292500948 | 0.039815 | 0.0487588    | 0.72882 | 0.027401761  | 0.845309 |
| FAM117A     | 0.530337586  | 0.039866 | -0.11497219  | 0.65856 | -0.022267406 | 0.931585 |

|             |              |          |              |         |              |          |
|-------------|--------------|----------|--------------|---------|--------------|----------|
| CLTA        | 0.142768765  | 0.039885 | 0.21210231   | 0.00211 | 0.096069868  | 0.164753 |
| POLM        | 0.324832479  | 0.039894 | 0.163762797  | 0.29674 | 0.05682336   | 0.718203 |
| SRM         | 0.337678393  | 0.039905 | 0.01535572   | 0.92569 | -0.078495743 | 0.633838 |
| ASB6        | 0.219300322  | 0.039917 | 0.18350474   | 0.08127 | 0.173849821  | 0.098987 |
| FLOT2       | -0.312612826 | 0.039982 | -0.428886852 | 0.00478 | -0.243800312 | 0.108605 |
| LDHAL6B     | 0.813030563  | 0.039992 | 0.488567887  | 0.22214 | 0.48941656   | 0.219147 |
| UCK2        | -0.299555622 | 0.040005 | -0.143105288 | 0.32352 | -0.28796343  | 0.04703  |
| VPS41       | -0.230722703 | 0.04     | -0.161082974 | 0.14931 | -0.223825019 | 0.045107 |
| FANCD2      | -0.403595804 | 0.040038 | -0.234003467 | 0.23256 | -0.159644405 | 0.414743 |
| SKI         | 0.638717638  | 0.040058 | 0.545781626  | 0.07957 | 0.367008827  | 0.238691 |
| DACT1       | 0.746817336  | 0.040093 | 0.982536616  | 0.00679 | 0.2701882    | 0.457975 |
| C17orf89    | -0.404502843 | 0.040129 | -0.120419358 | 0.53337 | -0.123181485 | 0.523635 |
| PIGL        | 0.315096173  | 0.040132 | -0.12330074  | 0.42312 | -0.036019595 | 0.814151 |
| PLXNB1      | 0.256973224  | 0.040119 | 0.064870751  | 0.60425 | 0.176070132  | 0.159106 |
| CSRP2       | 0.382196605  | 0.040187 | 0.0710866    | 0.70319 | 0.444573121  | 0.016651 |
| MAN1B1      | -0.343803775 | 0.040191 | -0.209332346 | 0.20977 | -0.613906068 | 0.000246 |
| IRGQ        | 0.185376839  | 0.040242 | 0.154347762  | 0.08676 | 0.283985191  | 0.001571 |
| NSMCE1      | -0.283073757 | 0.040251 | -0.210842576 | 0.11766 | -0.212403955 | 0.116226 |
| PLA2G4B     | 0.962685111  | 0.040306 | -0.221187023 | 0.63667 | 0.422374577  | 0.368233 |
| EVA1A       | 0.747447253  | 0.04034  | 0.70687677   | 0.05242 | 0.665967315  | 0.066785 |
| PRKCA       | 0.306360323  | 0.040383 | 0.215855957  | 0.14861 | 0.206756874  | 0.166249 |
| IP11-61N20. | -0.748987216 | 0.040433 | 0.165960792  | 0.62681 | 0.224742109  | 0.508131 |
| CMIP        | 0.976660255  | 0.040458 | 0.616571302  | 0.19668 | 0.31243776   | 0.513387 |
| EHD2        | 0.537049837  | 0.040474 | 0.133174369  | 0.61426 | -0.217601042 | 0.411353 |
| PLEKHF1     | 0.681200713  | 0.040523 | 0.093938636  | 0.78548 | 0.231689133  | 0.489815 |
| METTL18     | -0.296124242 | 0.040541 | 0.014504012  | 0.91648 | 0.093878678  | 0.492993 |
| CPOX        | -0.309214712 | 0.040624 | -0.115224569 | 0.44002 | -0.015403488 | 0.917873 |
| PDIA4       | -0.254345675 | 0.040627 | -0.189424544 | 0.12713 | -0.279230386 | 0.024539 |
| MCHR1       | 1.60937449   | 0.04065  | 1.15271695   | 0.14313 | 0.624895959  | 0.43657  |
| TTC7B       | 0.59702214   | 0.040702 | 0.250919609  | 0.39011 | 0.29794652   | 0.306779 |
| LRP5        | -0.310449765 | 0.040762 | -0.525027445 | 0.00054 | -0.726502913 | 1.72E-06 |
| KIAA1755    | 1.372071369  | 0.040852 | 1.790332336  | 0.00685 | 0.75288809   | 0.265294 |
| MFAP2       | 0.377351852  | 0.040847 | -0.011208367 | 0.95162 | 0.225610035  | 0.221442 |
| CYP27A1     | 0.953506167  | 0.0409   | 1.219841478  | 0.0083  | 0.119215216  | 0.802324 |
| IRX2        | -0.83264813  | 0.040917 | -0.856227509 | 0.03494 | -0.991714942 | 0.014732 |
| NTRK3       | 0.917584228  | 0.040888 | 0.706711526  | 0.11515 | 0.158433192  | 0.72423  |
| PHYH        | -0.323495659 | 0.04088  | -0.045668564 | 0.76716 | -0.383358853 | 0.013894 |
| RPS4XP5     | -1.222906482 | 0.040911 | -0.440168139 | 0.41769 | -0.548596495 | 0.314752 |
| CCDC183     | -0.483845309 | 0.04095  | -0.755513988 | 0.0014  | -0.511901324 | 0.030219 |
| SMIM4       | -0.544646706 | 0.040981 | -0.596525532 | 0.0227  | -0.544140426 | 0.038839 |
| ARHGEF10L   | 0.361280471  | 0.041047 | 0.41117456   | 0.01973 | 0.046666849  | 0.792127 |
| FMNL3       | 0.54527505   | 0.041073 | 0.245789166  | 0.3578  | 0.495746785  | 0.063461 |
| ACIN1       | 0.145812165  | 0.041179 | -0.018375739 | 0.79671 | 0.147674316  | 0.037756 |
| AIM1L       | 0.524128708  | 0.041223 | 0.190926136  | 0.45838 | 0.744625161  | 0.003657 |
| APOL1       | 0.810032957  | 0.041209 | 1.288724429  | 0.00112 | 0.555185052  | 0.161601 |
| CDX2        | 0.77424004   | 0.041241 | 0.415207313  | 0.27409 | 0.458970749  | 0.226352 |
| FAM115B     | 0.554715387  | 0.041197 | 0.140919594  | 0.60644 | -0.042512537 | 0.877012 |



|          |              |          |              |         |              |          |
|----------|--------------|----------|--------------|---------|--------------|----------|
| MAB21L2  | 0.511230707  | 0.041217 | -0.234137125 | 0.35072 | 0.608830754  | 0.014972 |
| MRPL9    | 0.255881854  | 0.041141 | -0.081726247 | 0.51409 | 0.248497662  | 0.045975 |
| PAN2     | -0.372723045 | 0.041143 | -0.140593621 | 0.43992 | -0.172127519 | 0.344404 |
| RAI1     | 0.383344215  | 0.041179 | -0.046435306 | 0.80491 | 0.037274921  | 0.842921 |
| RASA4CP  | 0.655726029  | 0.041192 | 0.328784047  | 0.3074  | 0.365509714  | 0.256562 |
| SEL1L    | -0.281278004 | 0.041178 | -0.071944971 | 0.60112 | -0.087683087 | 0.524046 |
| SNX19P3  | -1.084614365 | 0.041124 | -1.094157305 | 0.03643 | -1.036950394 | 0.045068 |
| SNX25    | 0.561244053  | 0.041138 | 0.22421795   | 0.41481 | 0.413645585  | 0.132256 |
| TIRAP    | 0.431923069  | 0.041242 | 0.176078835  | 0.40527 | 0.178342609  | 0.39857  |
| ZNF815P  | -0.970830719 | 0.04127  | 0.312450049  | 0.44419 | -0.971313752 | 0.033824 |
| TRMT61B  | -0.461865465 | 0.041309 | -0.404450707 | 0.06894 | -0.153528143 | 0.489725 |
| CYHR1    | -0.240266079 | 0.041448 | -0.322831747 | 0.00609 | -0.478564538 | 5.50E-05 |
| ZDHC14   | 0.390549741  | 0.041443 | 0.247029926  | 0.19    | 0.186998441  | 0.324278 |
| ARHGDI1A | 0.373806056  | 0.041462 | 0.119955576  | 0.51381 | -0.045435869 | 0.80485  |
| MST1R    | 0.491630371  | 0.041501 | 0.250445634  | 0.29926 | 0.400710761  | 0.096051 |
| GATAD2B  | 0.400440814  | 0.041531 | -0.021154348 | 0.9146  | 0.133141709  | 0.498173 |
| PABPC5   | 0.628450916  | 0.041559 | 0.216744841  | 0.4829  | 0.329539479  | 0.284128 |
| TUBGCP3  | -0.335607269 | 0.041644 | -0.511350739 | 0.00186 | -0.273096227 | 0.095059 |
| CDHR5    | 1.241722792  | 0.041656 | 0.384224741  | 0.52899 | 0.023685703  | 0.969075 |
| CTSC     | 0.329703736  | 0.041696 | 0.226037258  | 0.16262 | 0.400657212  | 0.013282 |
| RAB27B   | -0.317518822 | 0.041707 | -0.330735804 | 0.03385 | 0.187791646  | 0.227757 |
| SLC39A4  | 1.052640147  | 0.041721 | 0.404121473  | 0.43546 | 0.520432729  | 0.315955 |
| AGPAT5   | -0.303240427 | 0.041758 | 0.053907941  | 0.71597 | -0.004007528 | 0.978424 |
| CDNF     | -0.981245657 | 0.041774 | -0.801771964 | 0.0763  | -0.330803727 | 0.447634 |
| GPATCH11 | -0.248339364 | 0.041794 | 0.219311107  | 0.06109 | 0.205574037  | 0.080589 |
| ZNF845   | -0.375717326 | 0.041786 | -0.12069701  | 0.50988 | 0.1261419    | 0.490281 |
| IVD      | -0.389103246 | 0.041811 | -0.301911095 | 0.11212 | -0.259129547 | 0.172747 |
| MED27    | 0.221300792  | 0.041868 | 0.144379936  | 0.18027 | 0.307587638  | 0.003764 |
| NCOA5    | 0.289478432  | 0.041972 | 0.149592197  | 0.29285 | 0.377258277  | 0.007704 |
| RHOQP1   | -0.918578097 | 0.042024 | 0.333770266  | 0.39265 | 0.417184086  | 0.280578 |
| CRMP1    | 0.712941475  | 0.042035 | 0.18655035   | 0.59553 | 0.589024071  | 0.092829 |
| FCF1P8   | 1.391504224  | 0.042108 | 0.533008843  | 0.45536 | 0.915962355  | 0.186556 |
| EMILIN2  | 0.554832497  | 0.042216 | 0.481570751  | 0.0767  | 0.32596007   | 0.233222 |
| GRIN2D   | 1.115194763  | 0.042196 | 0.418507186  | 0.45723 | 0.234947281  | 0.678616 |
| POLR2D   | -0.251721945 | 0.042211 | -0.026739212 | 0.82781 | -0.088728701 | 0.470021 |
| ADAM17   | 0.220080978  | 0.042256 | 0.308021223  | 0.00431 | 0.348385877  | 0.001232 |
| TMEM132C | -2.031300548 | 0.042263 | 0.189018503  | 0.83896 | -2.534821143 | 0.012677 |
| EXTL3    | 0.310285603  | 0.042288 | 0.041523502  | 0.78583 | 0.059665065  | 0.695763 |
| SLC7A6   | 0.523854076  | 0.04232  | 0.098232599  | 0.70398 | 0.030241443  | 0.906786 |
| COX14    | -0.319603686 | 0.0424   | -0.383319464 | 0.01388 | -0.307675396 | 0.046486 |
| ID4      | 0.534897195  | 0.042444 | 0.558960297  | 0.03359 | 0.833573705  | 0.001486 |
| ALDH1B1  | -0.307116496 | 0.042469 | -0.296385167 | 0.04963 | -0.141147637 | 0.348691 |
| SLC6A6   | -1.746975591 | 0.042481 | -0.741239631 | 0.36966 | -3.523606267 | 0.000229 |
| CERS1    | 0.740863215  | 0.042517 | 0.124041973  | 0.73795 | 0.355400828  | 0.333327 |
| KCNIP4   | -0.493717611 | 0.042514 | -0.324715508 | 0.17105 | -0.099693715 | 0.66481  |
| SLFN12   | 0.512037618  | 0.042502 | 0.200300794  | 0.42757 | 0.534464428  | 0.033132 |
| ZWILCH   | -0.359912867 | 0.042582 | -0.181551303 | 0.30188 | -0.180565484 | 0.304321 |

|             |              |          |              |         |              |          |
|-------------|--------------|----------|--------------|---------|--------------|----------|
| LATS1       | 0.205055686  | 0.042619 | -0.059244131 | 0.55795 | -0.015770449 | 0.875819 |
| ALKBH6      | 0.377841334  | 0.042667 | 0.317653152  | 0.08843 | 0.043623403  | 0.814036 |
| STRA13      | -0.336936555 | 0.042794 | -0.205925439 | 0.2102  | -0.37464616  | 0.02326  |
| TMEM41B     | -0.19131726  | 0.042796 | -0.102636571 | 0.27406 | -0.014905637 | 0.873592 |
| COLEC12     | 0.51748957   | 0.042863 | 0.681885732  | 0.00753 | 0.410535879  | 0.10794  |
| MLIP        | 1.125828276  | 0.042837 | 0.505237     | 0.36592 | -0.09683458  | 0.867157 |
| RBM41       | -0.340361183 | 0.042858 | -0.183380184 | 0.27198 | -0.073959007 | 0.657077 |
| SCAPER      | -0.316812299 | 0.042857 | -0.197194673 | 0.20469 | -0.143116852 | 0.355513 |
| CKMT1B      | -0.435942152 | 0.042891 | -0.428673894 | 0.04509 | -0.46449072  | 0.029968 |
| CFL1        | 0.177621652  | 0.042924 | 0.084878774  | 0.3331  | 0.134214131  | 0.125793 |
| CSAD        | 0.458156107  | 0.042984 | -0.005585658 | 0.98039 | 0.033908612  | 0.88143  |
| GSG2        | -0.425131041 | 0.04298  | -0.129302597 | 0.53034 | -0.166980977 | 0.417486 |
| MPND        | -0.410532449 | 0.042966 | -0.175926912 | 0.38027 | -0.120829298 | 0.547599 |
| ESCO1       | 0.193619678  | 0.043018 | 0.025223898  | 0.79075 | -0.169265553 | 0.075028 |
| SHROOM4     | 0.36978358   | 0.043034 | 0.175812393  | 0.33585 | 0.17329642   | 0.342177 |
| STX5        | 0.290679384  | 0.043037 | 0.151436265  | 0.29125 | 0.153701748  | 0.283471 |
| ARF6        | -0.18767977  | 0.043122 | -0.142432484 | 0.12357 | -0.165980157 | 0.072626 |
| 15-Sep      | -0.161128576 | 0.043149 | 0.069515231  | 0.37923 | -0.096413487 | 0.223476 |
| P11-159D12  | -0.455277245 | 0.043163 | -0.090604516 | 0.68041 | 0.284353228  | 0.190073 |
| ULBP1       | -0.508077066 | 0.043185 | -0.050237461 | 0.8325  | -0.314955413 | 0.191955 |
| ZNF563      | -0.530407088 | 0.043252 | 0.115522904  | 0.65425 | -0.238486154 | 0.355551 |
| ANKRD29     | -0.89673124  | 0.043336 | -0.614400668 | 0.15442 | -0.792183833 | 0.068338 |
| IL1RAPL1    | 0.598550458  | 0.043336 | -0.166501717 | 0.58163 | 0.399470282  | 0.175723 |
| C1GALT1     | -0.312946443 | 0.04336  | -0.015640761 | 0.91939 | -0.149849225 | 0.332437 |
| CSPG4P11    | 0.578002738  | 0.043409 | -0.263942675 | 0.36464 | 0.18131169   | 0.527813 |
| ICA1        | -0.353171034 | 0.0434   | -0.046756803 | 0.78791 | -0.182897069 | 0.292535 |
| DYNLL2      | -0.223584775 | 0.043422 | -0.190277385 | 0.08449 | -0.161416647 | 0.142837 |
| TTC33       | -0.286961593 | 0.043533 | -0.095329942 | 0.49803 | 0.114583511  | 0.413088 |
| ZNF564      | -0.360369381 | 0.043533 | -0.168601157 | 0.33377 | -0.388746587 | 0.026537 |
| PRDM10      | 0.299536807  | 0.043575 | 0.148845024  | 0.31425 | 0.32018838   | 0.030017 |
| STK25       | 0.16295337   | 0.043577 | 0.029043924  | 0.71849 | 0.138767945  | 0.084253 |
| TRAPPC10    | 0.250147923  | 0.043622 | 0.038382674  | 0.7566  | 0.092304714  | 0.455271 |
| P11-495P10. | 0.813764332  | 0.043673 | 0.040720858  | 0.92278 | 0.143778197  | 0.728883 |
| PROSER2     | -0.488007012 | 0.043722 | -0.666415881 | 0.00581 | -0.464543292 | 0.053152 |
| EBF4        | 0.420863306  | 0.043805 | 0.008988246  | 0.96586 | 0.080508292  | 0.700503 |
| PON1        | -1.234828158 | 0.043803 | -0.088760071 | 0.88097 | -0.713991144 | 0.239652 |
| TBP         | 0.458859139  | 0.043812 | 0.085402417  | 0.70887 | 0.147945904  | 0.516473 |
| TMEM50B     | -0.288192538 | 0.043784 | -0.091527744 | 0.51723 | -0.284120602 | 0.044994 |
| LTV1        | -0.290681082 | 0.04385  | 0.015749077  | 0.9116  | 0.086070987  | 0.542653 |
| LAMB3       | 0.391282905  | 0.043925 | 0.48598225   | 0.01231 | 0.148551252  | 0.444319 |
| SAMD11      | 1.52068049   | 0.043996 | 0.886652196  | 0.24133 | 0.75713218   | 0.318227 |
| CCDC124     | 0.374545539  | 0.044049 | 0.374077575  | 0.04332 | -0.028409704 | 0.87921  |
| COL22A1     | 1.114130392  | 0.044058 | 1.560129816  | 0.00486 | 0.546861062  | 0.323123 |
| YIF1B       | -0.301270053 | 0.044057 | -0.054066501 | 0.71207 | -0.5207821   | 0.000534 |
| CDHR2       | 1.617199206  | 0.044107 | 0.612165999  | 0.4468  | 0.908471135  | 0.259178 |
| ERLIN2      | -0.285759058 | 0.044171 | -0.234645317 | 0.09777 | -0.492319391 | 0.000516 |
| BNC1        | 1.216464577  | 0.044224 | -0.504489725 | 0.41174 | 1.273487029  | 0.034809 |

|              |              |          |              |          |              |          |
|--------------|--------------|----------|--------------|----------|--------------|----------|
| ADD1         | 0.190774315  | 0.044259 | 0.152955015  | 0.10629  | 0.293158357  | 0.001948 |
| CDS1         | -0.300355661 | 0.044273 | -0.137768706 | 0.355    | -0.255554398 | 0.086362 |
| GHDC         | -0.448455758 | 0.044275 | -0.335943138 | 0.12464  | -0.16373793  | 0.450738 |
| RBMS3        | 0.664484808  | 0.044264 | 0.704577331  | 0.03278  | 0.538266309  | 0.103166 |
| BVES         | 0.753917597  | 0.044288 | 0.639951947  | 0.08755  | 0.47937205   | 0.201757 |
| MST1L        | -0.965342036 | 0.044311 | -0.127734971 | 0.7892   | -0.13224861  | 0.779081 |
| ERO1LB       | 0.793360844  | 0.044337 | 0.776295277  | 0.04692  | 0.437910038  | 0.265812 |
| DDIT4        | -0.575218442 | 0.044368 | -0.891257741 | 0.00184  | -0.932832699 | 0.001113 |
| TFF3         | -0.562569996 | 0.044366 | -0.028713978 | 0.91824  | -1.118954395 | 6.38E-05 |
| GLCE         | 0.230908083  | 0.044381 | 0.490359215  | 1.73E-05 | 0.073339782  | 0.522558 |
| JAGN1        | -0.217158132 | 0.044455 | -0.040920174 | 0.69943  | 0.0554792    | 0.598696 |
| POP5         | -0.330868857 | 0.044463 | -0.144095817 | 0.37296  | -0.331980468 | 0.041626 |
| BCAP31       | -0.186571942 | 0.044453 | -0.096241412 | 0.29722  | -0.18833401  | 0.041464 |
| TERT         | -1.335514417 | 0.044562 | -1.058848727 | 0.10973  | -1.840374144 | 0.007239 |
| PRSS22       | 0.469928671  | 0.044603 | 0.445691378  | 0.0565   | 0.315642822  | 0.177413 |
| IL17B        | 1.066386173  | 0.044663 | 0.348643148  | 0.52151  | 1.137209852  | 0.030391 |
| IP11-415112. | 2.665697168  | 0.044658 | 1.12176727   | 0.40761  | 0.874270968  | 0.515355 |
| COX7B        | -0.207472364 | 0.044722 | 0.128334705  | 0.21144  | -0.022309092 | 0.828247 |
| NFATC2       | 0.504748526  | 0.044718 | 0.258145696  | 0.30477  | 0.289288105  | 0.248714 |
| BMP2K        | 0.27609137   | 0.044811 | 0.023498847  | 0.86413  | 0.023912931  | 0.861766 |
| AFTPH        | -0.261874423 | 0.044862 | -0.086555931 | 0.50554  | 0.067237809  | 0.604513 |
| NDUFV2       | 0.239367988  | 0.044878 | 0.47791657   | 5.80E-05 | 0.505572267  | 2.09E-05 |
| PPP1R7       | -0.209126062 | 0.044849 | -0.11750732  | 0.25321  | -0.11943778  | 0.246282 |
| SHANK2       | -0.439494498 | 0.044868 | -0.170999286 | 0.43412  | -0.496152881 | 0.023341 |
| SLC51B       | 1.347410618  | 0.04487  | 0.752767919  | 0.2673   | -0.563196586 | 0.4315   |
| NR2F1        | 1.003285965  | 0.044982 | 1.383028726  | 0.00567  | 0.155217149  | 0.756815 |
| ATF5         | 0.403997272  | 0.045036 | -0.066854156 | 0.74303  | 0.046448773  | 0.818734 |
| TMBIM4       | -0.220066437 | 0.045033 | 0.232956012  | 0.03171  | -0.18276033  | 0.09359  |
| CCT6P1       | -0.388015437 | 0.045146 | -0.331599962 | 0.08352  | -0.031028847 | 0.86824  |
| SPTSSB       | -0.816363834 | 0.045181 | 0.011219205  | 0.97781  | -0.677406493 | 0.094416 |
| PPIEL        | 0.999951833  | 0.045278 | 0.261394513  | 0.6178   | 0.664038502  | 0.18692  |
| PTGES3P1     | 0.870520396  | 0.045283 | 0.828762447  | 0.05519  | 1.23886946   | 0.003558 |
| ZNF860       | -0.506161681 | 0.045295 | -0.442630405 | 0.07389  | -0.643309715 | 0.01041  |
| MLH1         | -0.296856432 | 0.045312 | -0.007832894 | 0.95761  | 0.061307662  | 0.677237 |
| CDC42        | 0.151392706  | 0.045363 | 0.216334748  | 0.00418  | 0.263510474  | 0.000482 |
| PCDHB14      | 0.788150975  | 0.045357 | -0.594484614 | 0.14009  | -0.244279651 | 0.53972  |
| C8orf48      | -0.589819312 | 0.0454   | 0.062036517  | 0.82436  | -0.437579278 | 0.126894 |
| CLDN1        | 0.534907134  | 0.045462 | 0.357037239  | 0.18181  | 0.568824484  | 0.033319 |
| KLF12        | 0.464509259  | 0.045468 | -0.038527046 | 0.86829  | 0.060312825  | 0.794967 |
| OTUD7A       | 1.680708594  | 0.045491 | 0.523959673  | 0.53202  | 0.724578712  | 0.391464 |
| NUMBL        | 0.557620309  | 0.045507 | 0.389620702  | 0.1626   | -0.030068579 | 0.914624 |
| CA14         | -0.53939479  | 0.045518 | -0.482690273 | 0.07026  | 0.006094916  | 0.981247 |
| COPS2        | -0.191165741 | 0.045543 | -0.02986597  | 0.75381  | 0.101955846  | 0.28292  |
| TXLNB        | -0.656541828 | 0.045618 | -0.2255375   | 0.48179  | -0.658006456 | 0.043191 |
| CIRBP        | -0.250227165 | 0.045689 | -0.131430704 | 0.29272  | -0.140639119 | 0.259913 |
| HSD17B14     | 0.983604853  | 0.045703 | 0.21850131   | 0.67259  | 0.675324988  | 0.170223 |
| ILD1R1       | 0.62841596   | 0.045661 | 0.397284075  | 0.20936  | -0.386710489 | 0.244166 |

|           |              |          |              |          |              |          |
|-----------|--------------|----------|--------------|----------|--------------|----------|
| NUP160    | -0.235721964 | 0.0457   | -0.229119367 | 0.05098  | -0.066045303 | 0.572987 |
| RAPGEF1   | 0.293308054  | 0.045679 | 0.156752736  | 0.28556  | -0.004693883 | 0.974526 |
| SLC41A3   | -0.402619845 | 0.0457   | -0.231139533 | 0.24734  | -0.106065039 | 0.59511  |
| USP24     | -0.164458558 | 0.045786 | -0.177235151 | 0.03115  | -0.050048413 | 0.542003 |
| ZNF720    | -0.297133398 | 0.045788 | -0.233372248 | 0.11398  | -0.083936054 | 0.568948 |
| DNAJC16   | -0.497873333 | 0.045831 | -0.229178836 | 0.35577  | 0.035607023  | 0.885986 |
| CANX      | -0.210654402 | 0.045843 | -0.033968553 | 0.74736  | -0.009337417 | 0.92944  |
| AZGP1     | -1.684548751 | 0.045892 | -1.0532115   | 0.19183  | -2.647349351 | 0.002624 |
| ETFA      | -0.207978243 | 0.045885 | -0.102739773 | 0.32219  | -0.080107844 | 0.439093 |
| C20orf112 | 0.330726251  | 0.045944 | 0.07381707   | 0.6564   | 0.098373611  | 0.55273  |
| GCAT      | -0.509607175 | 0.046041 | -0.133361873 | 0.59539  | -0.402352677 | 0.110506 |
| RBBP4     | -0.185574601 | 0.046058 | -0.176588388 | 0.05721  | -0.034180045 | 0.712344 |
| CDH16     | 1.684276265  | 0.046124 | 1.145394656  | 0.18346  | -1.552983828 | 0.099221 |
| CWC27     | -0.255262299 | 0.046135 | -0.116767217 | 0.35824  | -0.077075423 | 0.542928 |
| JAK2      | 0.451141855  | 0.04614  | 0.789518178  | 0.00047  | 0.606456883  | 0.007233 |
| NPY2R     | 1.60631932   | 0.046177 | 1.066087496  | 0.19051  | 1.770289995  | 0.026535 |
| RRP15     | -0.316524728 | 0.046262 | -0.013687512 | 0.9311   | -0.139679493 | 0.376629 |
| NXNL2     | 0.520829906  | 0.046286 | 0.159508894  | 0.54477  | 0.098071985  | 0.710412 |
| INPP5F    | -0.259422067 | 0.046379 | -0.072050366 | 0.57849  | -0.08602521  | 0.506604 |
| RNF165    | 0.900333896  | 0.046385 | 0.763496255  | 0.09131  | 0.452467281  | 0.316641 |
| TRIM15    | 1.677705016  | 0.046408 | 0.816201876  | 0.33477  | 0.799961011  | 0.34407  |
| KATNA1    | 0.320159913  | 0.046467 | 0.209030751  | 0.19064  | 0.283731986  | 0.074388 |
| STXBP3    | -0.280587199 | 0.046516 | -0.065370117 | 0.64046  | 0.16607514   | 0.233862 |
| BCKDK     | 0.310894912  | 0.046549 | 0.302275084  | 0.05248  | 0.14683997   | 0.34648  |
| BUB3      | -0.197427539 | 0.04659  | 0.038548563  | 0.69567  | -0.016878026 | 0.863925 |
| FAS       | -0.53209128  | 0.046575 | -0.418318544 | 0.11671  | -0.923446879 | 0.00057  |
| URGCP     | 0.277553238  | 0.046584 | 0.040397186  | 0.77163  | 0.392221455  | 0.004632 |
| KIAA0754  | 0.342278525  | 0.046653 | 0.021956601  | 0.89859  | 0.204844221  | 0.233327 |
| AP5Z1     | 0.368267352  | 0.046675 | 0.274711781  | 0.13816  | -0.027912136 | 0.880581 |
| NPM1P37   | -1.022826331 | 0.046673 | -0.453140833 | 0.33851  | 0.160395798  | 0.720842 |
| GPR146    | 0.811029723  | 0.046906 | 0.294770686  | 0.47825  | 0.254300355  | 0.541656 |
| FAM221A   | -0.570418171 | 0.046923 | -0.683317017 | 0.01724  | -0.447766719 | 0.118211 |
| PRKD2     | 0.315089822  | 0.046947 | 0.034577584  | 0.82725  | 0.195023648  | 0.218766 |
| MPV17     | -0.307021622 | 0.047001 | -0.236277335 | 0.12008  | -0.255302198 | 0.092571 |
| GPSM1     | 0.449213088  | 0.047036 | 0.011420475  | 0.95992  | 0.094801762  | 0.676145 |
| C3orf58   | -0.199779166 | 0.04706  | -0.10103005  | 0.31278  | -0.138097553 | 0.167627 |
| SREK1     | -0.193840809 | 0.047102 | -0.128331874 | 0.18735  | 0.044028641  | 0.650357 |
| PGF       | 0.63271092   | 0.047113 | 0.542618274  | 0.08782  | 0.331244431  | 0.299951 |
| TMEM165   | 0.234689296  | 0.047126 | 0.557427037  | 2.15E-06 | 0.382729867  | 0.001152 |
| ABHD15    | -0.370170559 | 0.04715  | -0.303599652 | 0.10052  | -0.757487457 | 5.40E-05 |
| FAM180B   | 1.054739928  | 0.047166 | 0.482313789  | 0.37373  | -0.492052042 | 0.396384 |
| PACSIN3   | -0.368104858 | 0.047156 | -0.623900285 | 0.00077  | -0.640497729 | 0.000541 |
| ZNF286A   | 0.240145793  | 0.047216 | 0.192174332  | 0.11129  | 0.492430366  | 4.11E-05 |
| DENND1B   | -0.558758028 | 0.047255 | -0.107802025 | 0.69921  | -0.548393998 | 0.049611 |
| ADCY5     | 0.64320945   | 0.047326 | -0.725746637 | 0.02709  | 0.152782224  | 0.637449 |
| RPL19     | -0.204090814 | 0.047438 | -0.004700005 | 0.96356  | -0.098253619 | 0.339608 |
| GSTCD     | -0.274534044 | 0.047474 | 0.006197149  | 0.96401  | 0.031374794  | 0.818981 |

|            |              |          |              |         |              |          |
|------------|--------------|----------|--------------|---------|--------------|----------|
| HNRNPLP2   | 1.264764893  | 0.047489 | -1.137443735 | 0.13122 | 0.393813324  | 0.548744 |
| P11-603K19 | 1.117182885  | 0.047503 | 0.944886852  | 0.09366 | 0.553003843  | 0.336221 |
| SLAIN2     | 0.353150577  | 0.047508 | 0.135364136  | 0.44716 | 0.198323128  | 0.265164 |
| TUBG1      | 0.245900301  | 0.047597 | 0.007124564  | 0.95429 | -1.37E-05    | 0.999912 |
| LARP1B     | -0.254368261 | 0.047609 | -0.189606341 | 0.1382  | -0.113131092 | 0.375147 |
| IDE        | -0.228137049 | 0.047623 | 0.031332938  | 0.7847  | 0.004732246  | 0.967079 |
| SMEK1      | -0.146224823 | 0.047637 | -0.011202465 | 0.8784  | 0.019843472  | 0.785985 |
| LAT        | 0.606888965  | 0.047705 | -0.291036608 | 0.35647 | -0.069022922 | 0.823384 |
| NUP107     | -0.227714608 | 0.047709 | 0.013167397  | 0.90821 | 0.11345351   | 0.319271 |
| SERPINA4   | -0.315776443 | 0.047723 | -0.090920814 | 0.56761 | -0.400310414 | 0.011996 |
| TAS2R64P   | -0.70561004  | 0.047713 | -0.431422998 | 0.21295 | -0.541956181 | 0.121036 |
| COPS7B     | 0.295635137  | 0.047772 | 0.332317589  | 0.02553 | 0.251763866  | 0.090475 |
| DDX10      | -0.365048254 | 0.047965 | -0.062098867 | 0.73569 | 0.036140202  | 0.843863 |
| FGF11      | 0.498475811  | 0.047978 | 0.380045619  | 0.13149 | -0.116359953 | 0.644916 |
| LMOD1      | 0.636662576  | 0.048079 | -0.385253284 | 0.23813 | 0.680566441  | 0.034027 |
| CSTB       | 0.447211222  | 0.04814  | 0.581189323  | 0.01019 | 0.286280401  | 0.205879 |
| TSKU       | 0.443035552  | 0.048139 | 0.025021117  | 0.91119 | 0.309410574  | 0.166942 |
| ZNF782     | -0.373868541 | 0.048139 | -0.180089909 | 0.33628 | -0.223915975 | 0.231327 |
| ICOSLG     | 0.613793019  | 0.048266 | 0.151499064  | 0.62827 | -0.217858073 | 0.484965 |
| FFAR4      | 0.766418547  | 0.048385 | 0.865482106  | 0.02464 | 0.554463257  | 0.152953 |
| SUPV3L1    | -0.282833361 | 0.048389 | -0.11744783  | 0.4091  | 0.006087747  | 0.965825 |
| SLC44A2    | -0.281597866 | 0.048486 | -0.22774395  | 0.10972 | -0.467639546 | 0.001035 |
| OMMD3-BM   | 0.578777328  | 0.048514 | 0.640117031  | 0.02836 | 0.712583275  | 0.014462 |
| ZNF681     | -0.371376097 | 0.048537 | -0.148662545 | 0.42675 | -0.193025105 | 0.301108 |
| HK1        | 0.264712514  | 0.048657 | 0.200186785  | 0.13575 | 0.244031264  | 0.068871 |
| KCND3      | 0.722580093  | 0.048675 | -0.003949002 | 0.99143 | 0.750154148  | 0.040501 |
| MPC1       | -0.228548675 | 0.048673 | 0.035576578  | 0.75243 | -0.088569202 | 0.433765 |
| ALDH1L1    | 0.811396481  | 0.048711 | 0.538782333  | 0.18968 | -0.14855983  | 0.719424 |
| SNRPA1     | 0.236147605  | 0.048731 | 0.272394169  | 0.02183 | 0.377684426  | 0.001373 |
| LASP1      | 0.19990099   | 0.048813 | -0.135018052 | 0.18353 | -0.041530322 | 0.682296 |
| PDE4D      | -0.355325031 | 0.04881  | -0.194392936 | 0.2805  | -0.377539617 | 0.036243 |
| P11-408P14 | -0.673787226 | 0.048796 | 0.041997152  | 0.89461 | -0.812180454 | 0.016442 |
| SULF2      | 0.301409775  | 0.048801 | -0.096942552 | 0.52661 | 0.227769983  | 0.136382 |
| VARS       | -0.282727745 | 0.048793 | -0.138546518 | 0.33342 | 0.043964936  | 0.758965 |
| CEACAM19   | 0.383750015  | 0.048848 | 0.029592121  | 0.88064 | 0.211202766  | 0.280562 |
| GLI1       | 0.733845593  | 0.048858 | 0.099128618  | 0.79059 | 0.303804247  | 0.414964 |
| LPAR5      | 0.636293459  | 0.048864 | 0.375647445  | 0.24708 | -0.490307939 | 0.145551 |
| PTCH1      | 0.521552532  | 0.04885  | -0.303699451 | 0.2519  | 0.208524839  | 0.430819 |
| AC007256.5 | 1.224816256  | 0.048961 | 0.419591762  | 0.51413 | 0.572716731  | 0.367101 |
| CHRN2      | 0.686668089  | 0.048951 | -0.034357879 | 0.92406 | 0.369036772  | 0.292019 |
| MOB3C      | 0.330778382  | 0.048954 | 0.296601297  | 0.07589 | 0.26855112   | 0.10791  |
| BRICD5     | 0.417140136  | 0.049035 | 0.237830983  | 0.25665 | 0.098214882  | 0.639025 |
| NUBP1      | -0.263677817 | 0.049108 | -0.212060576 | 0.10999 | 0.153903988  | 0.238772 |
| LRMP       | -1.190181174 | 0.049141 | -0.589107579 | 0.29984 | -0.935944278 | 0.115062 |
| HLA-DRB1   | 1.053857302  | 0.049204 | 0.568384025  | 0.28902 | 0.125794133  | 0.814626 |
| CCDC132    | -0.242564329 | 0.049232 | 0.070144333  | 0.56466 | -0.008004333 | 0.947678 |
| SERPINA1   | -0.628018886 | 0.049235 | 0.150032313  | 0.63844 | -0.537559329 | 0.092299 |

|            |              |          |              |         |              |          |
|------------|--------------|----------|--------------|---------|--------------|----------|
| CCP110     | -0.258253411 | 0.049266 | -0.01367233  | 0.91648 | -0.09265061  | 0.476834 |
| ADAT3      | 1.068674346  | 0.049294 | 0.341786259  | 0.54443 | -0.217812334 | 0.709015 |
| LGALS4     | 1.103079056  | 0.049307 | 0.063267979  | 0.91027 | -0.022827969 | 0.967565 |
| XRCC6      | -0.162509716 | 0.049308 | 0.046007781  | 0.57684 | 0.121898775  | 0.139027 |
| SPOCD1     | 0.729169825  | 0.049348 | 0.773586831  | 0.03685 | 0.188419711  | 0.612699 |
| KAT2A      | -0.348319725 | 0.049425 | -0.077808981 | 0.65893 | -0.26742698  | 0.129797 |
| KCNH7      | -1.025630944 | 0.049417 | -0.608484518 | 0.23824 | -0.851804979 | 0.098657 |
| THTPA      | -0.481124504 | 0.049546 | -0.118574572 | 0.62234 | -0.053765594 | 0.823408 |
| TAX1BP1    | 0.193300363  | 0.049574 | 0.34408245   | 0.00046 | 0.33222425   | 0.000713 |
| GNAI1      | -0.264322593 | 0.049589 | -0.036027095 | 0.78765 | -0.163778798 | 0.221173 |
| PRICKLE3   | 0.427555524  | 0.049618 | 0.434815116  | 0.04664 | 0.307575965  | 0.159761 |
| HNRNPH3    | 0.322174317  | 0.04963  | 0.083503534  | 0.61074 | 0.262341758  | 0.109473 |
| CCDC148    | 0.574512715  | 0.049745 | 1.015957209  | 0.00033 | 0.671779944  | 0.018925 |
| NSUN2      | -0.159221945 | 0.049739 | -0.161416801 | 0.04434 | -0.113071234 | 0.158254 |
| PLCZ1      | -1.459090181 | 0.049753 | -0.311328912 | 0.64553 | -0.877828115 | 0.209154 |
| ZNF70      | 0.297338042  | 0.049746 | 0.16850383   | 0.26536 | 0.111607846  | 0.460726 |
| ARL6IP4    | -0.196258802 | 0.049787 | -0.027562128 | 0.78106 | -0.035172738 | 0.722593 |
| ZNF671     | -0.415650543 | 0.049782 | 0.085454097  | 0.67676 | -0.006929114 | 0.973103 |
| MAGEB10    | 0.793007468  | 0.049829 | 0.29262909   | 0.4787  | 0.14937987   | 0.719215 |
| SLA2       | 0.761684443  | 0.049828 | 0.609027125  | 0.11661 | 0.524050182  | 0.177651 |
| C1QTNF5    | 0.537309754  | 0.049933 | -0.207880421 | 0.46    | 0.427747199  | 0.117381 |
| ELP2       | -0.263715561 | 0.049951 | -0.127691087 | 0.34021 | -0.077162632 | 0.564081 |
| GSKIP      | 0.340926852  | 0.049915 | 0.156626443  | 0.36768 | 0.401606506  | 0.02044  |
| HMHA1      | 0.399344049  | 0.049925 | 0.263302459  | 0.19658 | 0.128552752  | 0.528429 |
| N6AMT1     | -0.277208218 | 0.049943 | -0.227646769 | 0.10305 | -0.190354049 | 0.169775 |
| SAAL1      | -0.299542431 | 0.049935 | -0.032765384 | 0.82724 | -0.167045048 | 0.266395 |
| AC004945.1 | -1.652787798 | 0.039216 | -1.120848139 | 0.12175 | -0.81389677  | 0.240549 |
| AC005884.1 | -1.753598529 | 0.032112 | -0.020042753 | 0.976   | -0.429470603 | 0.529384 |
| AC006547.1 | 3.068367607  | 0.02935  | 4.43976644   | 0.00096 | 3.525542203  | 0.00968  |
| AC007229.3 | -3.93597252  | 0.008781 | -0.526720983 | 0.66204 | -0.415862936 | 0.72766  |
| AC015818.3 | -3.834618201 | 0.003578 | -0.726865927 | 0.49378 | -2.849388889 | 0.01581  |
| AC022210.2 | 3.45419932   | 0.026856 | 3.528950575  | 0.02296 | 1.915588958  | 0.241322 |
| AC097721.1 | -1.767371337 | 0.033402 | -0.330749128 | 0.62354 | -1.634313656 | 0.036576 |
| AC104843.3 | -3.813324075 | 0.011651 | -0.944089821 | 0.45385 | -0.175253042 | 0.883841 |
| ACTN2      | 2.069292557  | 0.011917 | 0.961137607  | 0.24827 | 1.121455157  | 0.179637 |
| AL353997.3 | -2.784372542 | 0.012747 | -0.248864008 | 0.76871 | -3.764137322 | 0.001559 |
| ALOX12B    | 2.021679203  | 0.018541 | 1.315717811  | 0.1462  | 0.515895122  | 0.573563 |
| AOC4P      | -2.006255677 | 0.021429 | -0.18872009  | 0.81199 | -0.586059835 | 0.461231 |
| AP000936.1 | -2.803849859 | 0.045263 | -1.998688806 | 0.12141 | -1.092721301 | 0.374851 |
| ARHGAP36   | -3.440833986 | 0.030953 | -0.591654828 | 0.65916 | -1.428459576 | 0.327992 |
| ARPC3P1    | -1.889190485 | 0.008775 | -0.52194144  | 0.37716 | -1.208944422 | 0.055227 |
| ATP4A      | 2.52279383   | 0.032442 | 2.301737859  | 0.04986 | 0.970321806  | 0.42768  |
| BEND3P3    | 3.667569739  | 0.042326 | 2.72152966   | 0.1377  | 2.588372237  | 0.158846 |
| C10orf126  | 3.472866219  | 0.013971 | 1.731169529  | 0.22883 | 1.902583519  | 0.184292 |
| C10orf53   | 1.979253183  | 0.019063 | 1.399364137  | 0.10292 | 0.756658354  | 0.393004 |
| C10orf99   | 2.770215874  | 0.044723 | 0.703900511  | 0.63614 | -1.198870221 | 0.476529 |
| C12orf74   | 1.301542288  | 0.044729 | 0.631103408  | 0.34936 | 0.036470689  | 0.958618 |

|            |              |          |              |         |              |          |
|------------|--------------|----------|--------------|---------|--------------|----------|
| C19orf38   | -2.132653418 | 0.035042 | 0.322010619  | 0.63202 | -1.292068826 | 0.118081 |
| C1orf195   | -2.745840178 | 0.013447 | -1.741215683 | 0.0623  | -0.326048649 | 0.699656 |
| C1QTNF9B   | -1.458849488 | 0.019437 | -1.124117345 | 0.04951 | -1.351681279 | 0.02056  |
| CALHM1     | -1.987662464 | 0.02101  | 0.142049211  | 0.8244  | -0.868343606 | 0.214102 |
| CALML3     | 4.296346404  | 0.041344 | 2.401510964  | 0.26089 | -0.889930331 | 0.702255 |
| CASQ2      | 3.787022531  | 0.008699 | 4.384794704  | 0.00182 | 1.000460353  | 0.504004 |
| CDH20      | -1.948134694 | 0.045898 | -1.579383519 | 0.11242 | -0.803507804 | 0.390282 |
| CITED1     | 2.017889338  | 0.000898 | 1.233564166  | 0.05191 | 0.987743389  | 0.124152 |
| CLCA2      | 4.406531089  | 0.002497 | 3.605659876  | 0.01322 | 2.708146806  | 0.069534 |
| CLCA4      | 3.12445545   | 0.004482 | 1.751306245  | 0.11647 | -0.612777601 | 0.625736 |
| CLEC18C    | -3.492689633 | 0.019695 | 0.497766802  | 0.65805 | -0.612755916 | 0.595297 |
| CNFN       | 2.037177096  | 0.023728 | 0.732166345  | 0.4494  | 0.251785818  | 0.802397 |
| CTA-85E5.6 | -3.283422401 | 0.01908  | 0.579190348  | 0.57983 | 0.228629481  | 0.829913 |
| TD-2302A16 | -3.524161684 | 0.010185 | -0.947206433 | 0.39903 | -1.749633775 | 0.158313 |
| CTRB1      | 3.982999806  | 0.009013 | 2.326817051  | 0.15357 | 2.593358424  | 0.104556 |
| CXCR2      | 2.190979044  | 0.031968 | 2.38675097   | 0.01794 | 1.589315953  | 0.125678 |
| CYCSP39    | 3.466870356  | 0.012148 | 1.59091193   | 0.29141 | 3.5849941    | 0.00886  |
| DHDH       | 1.150047688  | 0.047432 | 0.43690037   | 0.4804  | 0.529140672  | 0.372396 |
| DMRT2      | 2.969267351  | 0.034761 | 3.373341492  | 0.01375 | 2.062874832  | 0.175261 |
| DMRT3      | 4.497685853  | 0.003267 | 4.526340826  | 0.0028  | 0.832684203  | 0.630792 |
| DOK7       | 2.111091375  | 0.016222 | 0.726185983  | 0.44098 | 0.539068629  | 0.569439 |
| DSG1       | -2.912915742 | 0.006717 | -1.589162991 | 0.08454 | -0.783911516 | 0.378844 |
| DYDC2      | -4.537450025 | 0.010667 | 0.185859667  | 0.90056 | 0.769944872  | 0.601917 |
| EGLN1P1    | 4.73189834   | 0.030183 | 2.416497991  | 0.28658 | 1.364055409  | 0.563877 |
| ESRRAP2    | -3.423908828 | 0.011046 | 0.791501151  | 0.43522 | 0.280964718  | 0.786824 |
| FAM196B    | 1.948344367  | 0.010992 | 1.558671917  | 0.04173 | 1.557881343  | 0.0443   |
| FAM83C     | 1.173636849  | 0.04959  | 1.013614811  | 0.08969 | 0.542215844  | 0.377615 |
| FDCSP      | 5.261557143  | 7.28E-05 | 4.1645376    | 0.00179 | 3.138090748  | 0.019842 |
| FFAR3      | 3.295697374  | 0.034305 | 2.441224156  | 0.12904 | 2.786951221  | 0.075274 |
| FOXI1      | -4.355063201 | 0.011966 | -1.51674568  | 0.31874 | -3.10388541  | 0.068984 |
| GABRB1     | 1.577894841  | 0.044216 | 0.832659615  | 0.3012  | 0.828223359  | 0.298073 |
| GFI1B      | 1.691069851  | 0.010802 | 1.735888614  | 0.00762 | 1.646835694  | 0.011415 |
| GJB5       | 2.751277961  | 0.04072  | 1.882795352  | 0.1662  | -0.217558698 | 0.883221 |
| GOLGA8UP   | -2.944080093 | 0.039997 | -1.419963943 | 0.25315 | -0.91100634  | 0.436465 |
| GPR20      | 30.60901368  | 1.83E-05 | -0.038839249 | 0.9957  | -0.069212438 | 0.992344 |
| GPR55      | 5.026614853  | 0.000363 | 4.075435309  | 0.00461 | 2.375598944  | 0.116703 |
| GRIA3      | 3.058603144  | 0.040524 | 3.707354034  | 0.01098 | 3.406262812  | 0.01999  |
| GRIK3      | 4.075688638  | 0.006962 | 0.957490315  | 0.53726 | 4.455977711  | 0.002458 |
| GSTM5      | 2.260310835  | 0.031942 | 1.410471263  | 0.18206 | 1.266645181  | 0.228908 |
| GSTT2B     | -5.552927234 | 0.02682  | -1.175079912 | 0.61246 | -1.839696135 | 0.430303 |
| H2AFZP6    | 3.399959354  | 0.040849 | 0.603514853  | 0.74786 | 1.702602773  | 0.344881 |
| HCAR3      | 2.286181012  | 0.012063 | 0.29673059   | 0.76597 | 1.610475293  | 0.081146 |
| HCN2       | 1.275998625  | 0.029936 | 0.350826896  | 0.56791 | 0.336885632  | 0.582063 |
| HEPACAM2   | -1.77423063  | 0.028565 | -0.946203974 | 0.17565 | -2.790737803 | 0.001367 |
| HES5       | 3.556180488  | 0.029122 | 2.941424231  | 0.07583 | 2.562766125  | 0.127553 |
| HLA-J      | 1.349744734  | 0.048748 | 0.775542881  | 0.26842 | 0.036029463  | 0.960461 |
| HMGN1P10   | 2.725532989  | 0.009639 | 2.336930636  | 0.02767 | 1.785413655  | 0.099869 |

|            |              |          |              |          |              |          |
|------------|--------------|----------|--------------|----------|--------------|----------|
| INRNPA1P4  | -3.920042111 | 0.004182 | -2.060826428 | 0.09512  | -1.737276228 | 0.136255 |
| INRNPA1P7  | 1.545202818  | 0.040183 | 1.153876826  | 0.12956  | 0.790775467  | 0.3073   |
| HPR        | 1.373392494  | 0.018412 | 0.428454944  | 0.49007  | 0.578331351  | 0.333024 |
| HSD3B2     | 3.90613102   | 0.023218 | 3.78598504   | 0.02848  | -0.183523634 | 0.925627 |
| HSPD1P7    | 2.753120698  | 0.048674 | 2.401225826  | 0.08834  | 2.13254009   | 0.134492 |
| IDO1       | 2.41374708   | 0.008532 | 3.937692641  | 7.23E-06 | 3.108917374  | 0.000502 |
| IGFL3      | -3.587849792 | 0.020753 | -2.325609311 | 0.13167  | -0.657876236 | 0.612097 |
| IGJ        | 2.942407499  | 0.039847 | 1.955838035  | 0.18454  | -0.500576339 | 0.765995 |
| IL20       | 3.465170464  | 0.033858 | 0.697743987  | 0.70642  | -0.183523673 | 0.921079 |
| IL37       | 2.242163295  | 0.034639 | 0.125210809  | 0.91435  | -0.437053116 | 0.717675 |
| INHBC      | 2.936489156  | 0.037223 | 2.391654113  | 0.09524  | 2.06039908   | 0.156634 |
| INSM2      | -3.49319196  | 0.037573 | -1.175501043 | 0.43684  | -1.911265398 | 0.234381 |
| KCNJ9      | 2.346568815  | 0.048785 | 1.36659017   | 0.26883  | 0.936060022  | 0.459394 |
| KCNV2      | 1.462547476  | 0.049205 | 0.95616917   | 0.2087   | 0.656748103  | 0.396431 |
| KIAA1239   | 1.637783854  | 0.035288 | 1.740956102  | 0.02361  | 0.940465713  | 0.237708 |
| KL         | 3.407397176  | 0.00545  | 2.872608953  | 0.02145  | 2.032162178  | 0.120549 |
| KLRC1      | 1.959149285  | 0.039443 | 1.560152841  | 0.10432  | 1.444320451  | 0.133832 |
| KNG1       | 2.873457661  | 0.021524 | 3.218269779  | 0.00877  | 1.946727643  | 0.121518 |
| KRT18P34   | 1.620530338  | 0.025086 | 0.911907188  | 0.22289  | 1.701661462  | 0.016909 |
| KRT8P48    | 2.434817535  | 0.04963  | 2.740978232  | 0.02509  | 1.483705022  | 0.245142 |
| LBP        | 5.101583709  | 0.000582 | 4.051580658  | 0.00717  | 5.74907706   | 9.16E-05 |
| LDHAP5     | -1.412018223 | 0.022869 | -0.401665146 | 0.45753  | -0.607406243 | 0.267327 |
| LDHC       | -1.492254879 | 0.014873 | -0.144338551 | 0.79219  | -1.135827912 | 0.048195 |
| LILRB3     | 2.961286296  | 0.030945 | 3.418679586  | 0.01006  | 3.017033717  | 0.024507 |
| LIPF       | -4.385903967 | 0.007099 | -2.515155719 | 0.07727  | -2.356234807 | 0.092986 |
| INC01-131B | 3.613731918  | 0.025864 | 1.31415669   | 0.47617  | 2.689545802  | 0.106501 |
| MADCAM1    | 3.081500569  | 0.005647 | 1.198861992  | 0.30664  | 2.193759755  | 0.049836 |
| MARCKSL1P  | -1.461622283 | 0.025448 | -0.531999625 | 0.33545  | -0.644431607 | 0.245718 |
| MORF4L1P1  | -2.721378137 | 0.019301 | -0.754940427 | 0.43732  | -0.444452823 | 0.642683 |
| MS4A8      | -1.929474215 | 0.047109 | -0.138374736 | 0.86942  | -2.032383626 | 0.028539 |
| MT1L       | 3.813658336  | 0.021075 | 2.635869151  | 0.11847  | 1.150840004  | 0.525042 |
| MTCYBP3    | 1.680558305  | 0.044519 | 0.390402609  | 0.66454  | 0.206910283  | 0.82007  |
| NAPSB      | 1.635031376  | 0.040275 | 0.609419236  | 0.45206  | 1.17136912   | 0.1449   |
| NETO1      | 2.289406932  | 0.023613 | 1.548885898  | 0.12202  | 1.683464783  | 0.087813 |
| NKAIN2     | 2.327785834  | 0.036938 | 0.775300453  | 0.5036   | 0.642163757  | 0.580461 |
| NT5C3AP1   | -2.033140979 | 0.006082 | -0.254112483 | 0.66753  | -0.394049849 | 0.507708 |
| NT5CP1     | 3.114640522  | 0.034122 | 1.146409105  | 0.4828   | 2.073970306  | 0.172768 |
| NUTM2F     | 4.644732756  | 0.005129 | -0.117831387 | 0.95099  | 4.22033279   | 0.011215 |
| NXPE1      | 2.386386585  | 0.011875 | 1.784053383  | 0.05805  | 1.840315509  | 0.051158 |
| OR51E1     | -2.700777627 | 0.027551 | -4.526068514 | 0.00158  | -4.591760801 | 0.001349 |
| OR52N3P    | 3.039260269  | 0.006349 | 2.862343177  | 0.01016  | 4.211601233  | 0.000108 |
| OR52P1P    | 3.134619575  | 0.009623 | 2.627491082  | 0.03125  | 3.143639832  | 0.009083 |
| OR52U1P    | 2.874839829  | 0.029611 | 1.867022105  | 0.17131  | 3.56447056   | 0.005902 |
| OR7E11P    | 2.72948605   | 0.003644 | 2.708993662  | 0.00376  | 3.065715504  | 0.000941 |
| PCOLCE2    | 1.189394525  | 0.025531 | 0.57811482   | 0.29003  | -0.642176701 | 0.28892  |
| PDIA2      | 1.723340848  | 0.02909  | 1.016190354  | 0.20726  | 1.165300431  | 0.148367 |
| PGLYRP2    | 5.308302049  | 6.83E-05 | 5.897555946  | 8.92E-06 | 4.469816315  | 0.001004 |



|              |              |          |              |         |              |          |
|--------------|--------------|----------|--------------|---------|--------------|----------|
| PHBP15       | 5.490072821  | 0.0045   | 4.048863255  | 0.03847 | 3.77289629   | 0.05459  |
| PIWIL3       | -2.11276606  | 0.013734 | -0.596481866 | 0.36978 | -0.409866656 | 0.531761 |
| POMC         | 3.240347907  | 0.038047 | 1.845627288  | 0.27255 | 2.478218568  | 0.121624 |
| PPP1R14D     | 2.314776929  | 0.006057 | 2.192309583  | 0.00921 | 1.822347019  | 0.032269 |
| PRKRIRP9     | 2.072885416  | 0.035888 | 1.339087271  | 0.1864  | 0.879673203  | 0.39669  |
| PROZ         | 1.652796984  | 0.017668 | 1.507157253  | 0.03132 | 1.449766355  | 0.045972 |
| PRPH         | 4.447388581  | 0.012359 | 1.619845612  | 0.38908 | 4.146674376  | 0.01929  |
| RBMX2P1      | -2.956172876 | 0.033718 | -1.683196984 | 0.22284 | -1.22655721  | 0.334694 |
| RP1-130L23.  | 1.265737417  | 0.040594 | 0.76309326   | 0.22763 | 0.40142264   | 0.535518 |
| RP1-168P16.  | 1.31280473   | 0.046887 | -0.017714303 | 0.98028 | 0.367182161  | 0.594618 |
| RP1-278E11.  | -1.531220763 | 0.049637 | -0.869897902 | 0.21548 | -0.366971255 | 0.582107 |
| RP1-315G1.   | 1.345784637  | 0.025456 | 0.429660463  | 0.49829 | 0.308546332  | 0.628344 |
| RP1-39G22.   | 1.6177624    | 0.024305 | 1.424824748  | 0.04761 | 1.384231247  | 0.053936 |
| RP11-1094M1. | 2.864669309  | 0.049884 | 2.643362612  | 0.07136 | 3.041095526  | 0.033019 |
| RP11-10L12.  | -1.192623512 | 0.032341 | -0.224725539 | 0.64765 | -0.213760517 | 0.66184  |
| P11-113A11   | -2.930428258 | 0.030824 | 0.488370313  | 0.63137 | -0.418251831 | 0.704939 |
| RP11-1149O2. | 3.03799772   | 0.013744 | 2.405792077  | 0.05739 | 2.840839954  | 0.020988 |
| RP11-160A9.  | -1.790995257 | 0.049674 | -1.051348739 | 0.1858  | -0.394593202 | 0.591203 |
| RP11-166O4.  | 2.784911684  | 0.036815 | 1.188830846  | 0.42431 | 1.475896416  | 0.303954 |
| P11-288E14   | -2.141838234 | 0.042942 | -2.286692266 | 0.03021 | -1.291775011 | 0.158309 |
| P11-312J18   | -2.677679081 | 0.044056 | 1.163370207  | 0.21497 | 0.808929036  | 0.392481 |
| P11-345K20   | 1.561551105  | 0.028747 | 1.89772359   | 0.00627 | 1.602100086  | 0.022582 |
| RP11-350G8.  | 3.133749067  | 0.017603 | 3.275516289  | 0.01207 | 3.092203808  | 0.018292 |
| RP11-359M6.  | -3.22518783  | 0.021805 | 0.211176043  | 0.84512 | -1.365830883 | 0.279451 |
| P11-382A20   | 1.722134016  | 0.032176 | 0.448354249  | 0.60612 | 1.790896024  | 0.023837 |
| P11-459D22   | -2.540022905 | 0.006039 | -0.838907312 | 0.28134 | -1.5593421   | 0.055108 |
| P11-466P24   | -18.13305527 | 9.35E-05 | 0.172977556  | 0.96968 | 1.777637498  | 0.695087 |
| P11-486B10   | -2.71189858  | 0.047346 | -0.555125366 | 0.60795 | -0.886230093 | 0.425947 |
| RP11-589M4.  | 1.235045508  | 0.030191 | -0.043823846 | 0.94304 | 0.762211947  | 0.186292 |
| RP11-632F7.  | -4.350596444 | 0.018201 | 1.060430463  | 0.49478 | 0.103418078  | 0.947474 |
| RP11-655M14. | 4.702513518  | 0.001007 | 3.36120735   | 0.02297 | 3.571758847  | 0.014663 |
| P11-673D15   | -1.450737099 | 0.023782 | 0.284679991  | 0.56578 | -0.02828258  | 0.955513 |
| RP11-687F6.  | 1.363787864  | 0.027924 | 0.520877257  | 0.42064 | 0.978487933  | 0.117635 |
| RP11-71H17.  | -2.565535111 | 0.034425 | -0.261693767 | 0.75385 | -0.13425446  | 0.870032 |
| P11-730A19   | 2.739537912  | 0.033254 | 3.422593625  | 0.00578 | 3.367373695  | 0.006604 |
| RP11-777B9.  | 2.196441524  | 0.033041 | 1.484209959  | 0.1636  | 0.58159638   | 0.611976 |
| RP11-79D8.2  | -4.917251506 | 0.000734 | 0.376084456  | 0.72515 | -2.659424081 | 0.034492 |
| RP11-86K22.  | 2.627874792  | 0.040232 | 1.243520253  | 0.36359 | 3.262556833  | 0.009025 |
| P11-927P21   | 2.931828984  | 0.039629 | 0.883580479  | 0.56891 | 1.448718958  | 0.331267 |
| RP13-672B3.  | 2.033569819  | 0.042562 | 0.858525113  | 0.42063 | 1.837645746  | 0.066382 |
| RP5-890O15.  | 3.172089957  | 0.030195 | 1.939559571  | 0.21947 | 2.661455758  | 0.07338  |
| RPL10AP6     | 2.102299402  | 0.020026 | 0.958300845  | 0.30673 | 1.232384184  | 0.182047 |
| RPL22P11     | -3.863607469 | 0.028156 | -4.034235609 | 0.0219  | -0.025630617 | 0.986297 |
| RPL35P5      | -3.593918519 | 0.017528 | -0.508020057 | 0.68271 | 0.251187818  | 0.832862 |
| RPL5P5       | 3.16941118   | 0.036088 | 1.224930331  | 0.46122 | 2.016222117  | 0.198792 |
| RPL7P21      | -4.560030684 | 0.004005 | -1.782509904 | 0.18845 | -0.583626559 | 0.64699  |
| RPL7P44      | -3.518940601 | 0.013597 | -0.647693884 | 0.57527 | -1.000219417 | 0.399858 |

|             |              |          |              |          |              |          |
|-------------|--------------|----------|--------------|----------|--------------|----------|
| RPS2P41     | 3.114887393  | 0.025021 | 1.141168596  | 0.46522  | -0.183523735 | 0.912137 |
| RPS3AP39    | -2.995878055 | 0.047393 | -0.115148472 | 0.9238   | -2.594770592 | 0.082026 |
| RPS3AP46    | -3.335311786 | 0.009837 | 0.240015877  | 0.79334  | -1.121431914 | 0.294078 |
| RPS7P14     | -2.579281729 | 0.003103 | 0.031780076  | 0.95477  | -0.882401773 | 0.149675 |
| RTL1        | 2.20913825   | 0.019253 | 1.75662289   | 0.06517  | 1.135128087  | 0.244957 |
| RXRG        | 3.519473809  | 0.032381 | 3.882013191  | 0.01687  | 3.25576103   | 0.056172 |
| SERBP1P6    | 2.24313982   | 0.002005 | 1.165480802  | 0.12442  | 1.626961088  | 0.027368 |
| SERPINB4    | 3.957049017  | 0.004227 | 6.055013105  | 5.72E-06 | 3.189810774  | 0.022741 |
| SERPINC1    | 3.024907684  | 0.018827 | 2.388916975  | 0.07088  | 1.756983483  | 0.190269 |
| SETP20      | 2.755796182  | 0.024745 | 2.328738484  | 0.06037  | 2.556968404  | 0.036964 |
| SLC25A41    | 1.15799763   | 0.04641  | 0.443911069  | 0.46263  | 0.980036172  | 0.090662 |
| SLC28A1     | 4.126689128  | 0.00446  | 3.548892651  | 0.01505  | 2.377964543  | 0.118421 |
| SNRPGP12    | 1.768342066  | 0.042976 | 0.684370232  | 0.46038  | 0.542292871  | 0.560997 |
| SOWAHD      | -1.744555268 | 0.044326 | -2.131190343 | 0.01813  | -0.723398906 | 0.326557 |
| SOX10       | 2.066631881  | 0.00776  | 0.843238568  | 0.29308  | 1.366175689  | 0.081393 |
| SPINK4      | -3.827854218 | 0.0145   | -2.103630481 | 0.12547  | -2.417180196 | 0.079147 |
| SPRR2D      | 5.06962306   | 6.86E-05 | 5.181006765  | 4.31E-05 | 4.730501134  | 0.000209 |
| SRGN        | 3.942385187  | 0.02082  | 3.298468676  | 0.0543   | 1.325756835  | 0.491859 |
| SSX2        | 3.724740546  | 0.003853 | 1.084682679  | 0.46726  | 1.827380973  | 0.188886 |
| SSXP3       | 2.494609801  | 0.020375 | 2.042215827  | 0.0606   | 0.791481452  | 0.500964 |
| SULT1C3     | -1.452246175 | 0.044839 | -1.670677714 | 0.02149  | -0.834669443 | 0.22272  |
| TBX20       | 3.513683289  | 0.008078 | 2.634410443  | 0.04816  | 2.83776798   | 0.033869 |
| TBX22       | -2.587565374 | 0.049329 | -1.709631686 | 0.14322  | -2.151440095 | 0.071557 |
| TNFRSF18    | 3.289234977  | 0.004204 | 2.608043156  | 0.02549  | 2.243073184  | 0.055276 |
| TNFRSF4     | 1.855486128  | 0.029374 | 1.427419806  | 0.10323  | 0.764681829  | 0.385128 |
| TTC4P1      | 2.227753515  | 0.003841 | 1.584105554  | 0.04258  | 1.036117832  | 0.193381 |
| TUBBP10     | 2.274252012  | 0.032463 | 0.68473347   | 0.54463  | 1.959318301  | 0.065984 |
| UBQLNL      | 1.765692815  | 0.008039 | 1.326525267  | 0.04976  | 1.426041728  | 0.033258 |
| UCN2        | 1.135928908  | 0.045251 | 0.198282922  | 0.73933  | 0.606436356  | 0.292982 |
| WAS         | 1.786906198  | 0.049296 | 1.30361838   | 0.15808  | -0.427061499 | 0.667154 |
| WNT10B      | 4.898177422  | 2.06E-05 | 4.693518344  | 4.71E-05 | 4.721624172  | 4.24E-05 |
| XKRX        | 1.586209275  | 0.017658 | 0.490279672  | 0.48579  | 0.090937829  | 0.899774 |
| YBX1P10     | 3.284804146  | 0.02214  | 3.502672269  | 0.01303  | 3.695248463  | 0.008189 |
| YBX1P2      | 3.464714079  | 0.010199 | 3.130122608  | 0.02141  | 1.774725117  | 0.239434 |
| RPL3P4      | -1.407703265 | 0.560938 | -21.79074502 | 8.36E-17 | -1.344142049 | 0.57844  |
| ABCA6       | 0.676589751  | 0.05773  | 1.824834913  | 1.66E-07 | 0.628294363  | 0.077466 |
| NXT2        | 0.156824609  | 0.182334 | 0.566477121  | 8.06E-07 | 0.553872417  | 1.31E-06 |
| RP5-850E9.3 | 0.086375742  | 0.98612  | 22.86135021  | 2.55E-06 | 23.49577359  | 1.33E-06 |
| SDCBP       | 0.244751201  | 0.214156 | 0.919306877  | 2.97E-06 | 0.598437313  | 0.002361 |
| ALCAM       | 0.298980257  | 0.117572 | 0.881819469  | 3.80E-06 | 0.343989355  | 0.071566 |
| LPGAT1      | 0.180388899  | 0.102878 | 0.496796201  | 6.58E-06 | 0.239729433  | 0.029828 |
| PGM2L1      | 0.22692685   | 0.284598 | 0.929703819  | 1.08E-05 | 0.374232865  | 0.077028 |
| TBL1XR1     | 0.126381761  | 0.195012 | 0.412454804  | 2.24E-05 | 0.217040691  | 0.025771 |
| ABCA10      | 0.758395099  | 0.186305 | 2.349067677  | 3.34E-05 | 0.364302121  | 0.52574  |
| ZNF189      | 0.054488221  | 0.653652 | 0.497071503  | 3.40E-05 | 0.298230776  | 0.013121 |
| SELL        | 0.325663121  | 0.494761 | 1.876541557  | 3.47E-05 | 0.318404343  | 0.50022  |
| ATP5G2      | -0.155658114 | 0.08119  | -0.361137835 | 5.24E-05 | -0.272978904 | 0.002179 |

|             |              |          |              |          |              |          |
|-------------|--------------|----------|--------------|----------|--------------|----------|
| PKP4        | 0.166201359  | 0.132301 | 0.441231058  | 5.99E-05 | 0.292010268  | 0.007962 |
| LIX1        | -0.505725483 | 0.331122 | -2.104653782 | 6.05E-05 | 0.51083336   | 0.324817 |
| MMP10       | 1.052270002  | 0.107609 | 2.614177851  | 6.18E-05 | 0.563267473  | 0.389345 |
| :TD-2008A1. | 0.134176547  | 0.618775 | 1.061057579  | 7.40E-05 | 0.262418923  | 0.329036 |
| SLC12A2     | 0.282900377  | 0.152857 | 0.772650785  | 9.41E-05 | 0.32331599   | 0.102278 |
| GTDC1       | 0.203764969  | 0.142979 | 0.537299755  | 9.53E-05 | 0.184900016  | 0.180624 |
| SORD        | 0.317669357  | 0.120375 | 0.792447655  | 0.0001   | 0.159794493  | 0.434526 |
| STK38       | 0.139458569  | 0.096696 | 0.323011222  | 0.00011  | 0.265235738  | 0.001454 |
| PSMB8       | 0.181555963  | 0.298262 | 0.663555442  | 0.00011  | 0.177282312  | 0.30616  |
| SPG21       | 0.160581463  | 0.091847 | 0.363391873  | 0.00012  | -0.000846184 | 0.992893 |
| SKIL        | 0.263128668  | 0.135838 | 0.675760257  | 0.00012  | 0.380782201  | 0.030716 |
| PSMB10      | 0.173946845  | 0.172089 | 0.472948459  | 0.00014  | -0.061444128 | 0.629393 |
| NDUFV2P1    | 0.600000958  | 0.073611 | 1.235206979  | 0.00015  | 0.607283386  | 0.067241 |
| COPZ1       | -0.08387566  | 0.33799  | -0.327703703 | 0.00018  | -0.09972176  | 0.252809 |
| CUTA        | -0.177865732 | 0.050139 | -0.339147239 | 0.00018  | -0.214465892 | 0.017267 |
| ZNF354B     | -0.178313137 | 0.364935 | 0.722279667  | 0.00019  | 0.198899706  | 0.307176 |
| MARCKSL1    | -0.011388274 | 0.883158 | -0.28908204  | 0.00019  | -0.066805101 | 0.387496 |
| AMMECR1     | 0.184893866  | 0.131309 | 0.452264586  | 0.0002   | 0.291473251  | 0.01648  |
| MYO1D       | 0.253970863  | 0.065526 | 0.509079467  | 0.00022  | 0.128379943  | 0.351774 |
| SAMD9L      | 0.873332838  | 0.101457 | 1.916867068  | 0.00022  | 1.053056865  | 0.049073 |
| SNIP1       | 0.051628591  | 0.720107 | 0.525507794  | 0.00023  | 0.351079467  | 0.013846 |
| TMEM27      | 0.503516232  | 0.138412 | 1.236254803  | 0.00023  | 1.317957388  | 8.56E-05 |
| GAMT        | -0.252864785 | 0.207904 | -0.74773812  | 0.00024  | -0.737511845 | 0.000271 |
| PLCD3       | -0.013259996 | 0.953703 | -0.85259247  | 0.00024  | -0.655855595 | 0.004341 |
| KCNN3       | 0.016008875  | 0.967909 | -1.472796975 | 0.00025  | -0.430026249 | 0.280737 |
| STEAP2      | 0.120731017  | 0.455879 | 0.58916823   | 0.00025  | 0.065845803  | 0.684047 |
| LRIG3       | 0.217826407  | 0.059147 | 0.420575951  | 0.00026  | 0.296594781  | 0.01002  |
| ITGA8       | -0.191824986 | 0.375302 | -0.791796614 | 0.00026  | -0.162438997 | 0.451915 |
| THBS4       | 0.149576313  | 0.867891 | 3.183589017  | 0.0003   | -0.561114641 | 0.533462 |
| PDCD5       | 0.157468865  | 0.161447 | 0.40082729   | 0.00033  | 0.335111112  | 0.00267  |
| CRK         | 0.081713202  | 0.318841 | 0.291779857  | 0.00033  | 0.304563751  | 0.000178 |
| KCTD16      | 0.844436575  | 0.098807 | 1.822572378  | 0.00034  | 0.709024901  | 0.166874 |
| BCL2L15     | 0.690138942  | 0.085407 | 1.430456562  | 0.00036  | 0.67848287   | 0.090821 |
| SRPX        | 0.215695869  | 0.582371 | 1.382551332  | 0.00037  | 0.152278943  | 0.697592 |
| IFNAR1      | 0.119239183  | 0.188296 | 0.320654865  | 0.00037  | 0.161802452  | 0.072871 |
| OBSCN       | 0.041014636  | 0.806998 | -0.600537174 | 0.00038  | -0.467376502 | 0.005512 |
| CDK19       | 0.163270622  | 0.097335 | 0.346266797  | 0.00039  | 0.154835891  | 0.113369 |
| PAFAH1B3    | -0.18371219  | 0.202963 | -0.51392274  | 0.00039  | -0.261285679 | 0.069131 |
| CTNNA3      | -0.511167552 | 0.101197 | -1.117330868 | 0.00039  | -0.403542478 | 0.191771 |
| SMAD7       | 0.474164422  | 0.052676 | 0.863757439  | 0.0004   | 0.419567328  | 0.086206 |
| MFGE8       | -0.029710218 | 0.820457 | -0.463786522 | 0.0004   | -0.497210758 | 0.000151 |
| EIF4A1      | 0.077722984  | 0.455689 | 0.365739638  | 0.00044  | 0.225568528  | 0.030259 |
| CCDC102B    | 0.348285972  | 0.189082 | 0.913051191  | 0.00045  | 0.28078534   | 0.289377 |
| P11-104O19  | 0.411601551  | 0.211388 | 1.077063119  | 0.00048  | 0.639096791  | 0.043543 |
| NRXN2       | 1.137043413  | 0.239315 | 3.314351009  | 0.00049  | -0.367521675 | 0.720563 |
| RASGEF1B    | 0.204179046  | 0.174775 | 0.516026617  | 0.0005   | 0.148167846  | 0.320713 |
| TMC7        | 0.365766737  | 0.087903 | 0.738356014  | 0.0005   | 0.189666548  | 0.374818 |

|         |              |          |              |         |              |          |
|---------|--------------|----------|--------------|---------|--------------|----------|
| ABCA8   | 0.35458399   | 0.620871 | 2.427165757  | 0.00052 | -0.393559968 | 0.59194  |
| PROM1   | 0.238489058  | 0.223376 | 0.678652507  | 0.00052 | 0.250494691  | 0.200563 |
| CTSK    | 0.471855711  | 0.258331 | 1.421260828  | 0.00052 | 0.48187166   | 0.247313 |
| LPAR3   | 0.60080898   | 0.098697 | 1.205858238  | 0.00059 | -0.28892878  | 0.446807 |
| ACVR1   | 0.258123585  | 0.199677 | 0.678497643  | 0.00063 | 0.142826297  | 0.475464 |
| ANXA8   | 1.30521597   | 0.114439 | 2.793199755  | 0.00065 | 0.572543813  | 0.4916   |
| GALT    | -0.127725703 | 0.294706 | -0.412765267 | 0.00066 | -0.194059917 | 0.107628 |
| CRABP1  | 1.093718655  | 0.202475 | 2.899731077  | 0.00068 | 1.190929331  | 0.164568 |
| NME7    | -0.068029499 | 0.758399 | 0.745147692  | 0.00071 | 0.05369288   | 0.807778 |
| AACS    | -0.217067401 | 0.06384  | -0.393264925 | 0.00077 | -0.32950328  | 0.004792 |
| SERTAD2 | -0.099651166 | 0.563451 | -0.582645442 | 0.00077 | -0.322502955 | 0.06159  |
| XDH     | 0.394362654  | 0.157578 | 0.931889479  | 0.00079 | 0.009378437  | 0.973299 |
| FBXO36  | -0.25333213  | 0.095339 | -0.508203995 | 0.00081 | -0.437646475 | 0.003559 |
| TNFSF10 | 0.162220461  | 0.536216 | 0.870314861  | 0.00082 | 0.039462282  | 0.880245 |
| GSTA2   | -0.853752185 | 0.105849 | -1.78703037  | 0.00084 | -1.881950587 | 0.000443 |
| NTNG1   | 0.671852589  | 0.221079 | 1.809849655  | 0.00087 | 0.971852682  | 0.075216 |
| FAM27E4 | -0.401413398 | 0.142398 | -0.919113984 | 0.00098 | -0.296019347 | 0.272047 |
| GRPR    | 0.453117623  | 0.485861 | -2.51696244  | 0.00098 | -0.27933917  | 0.67149  |
| KANK4   | 0.750563654  | 0.057547 | 1.296159067  | 0.001   | 0.302537646  | 0.444555 |
| GJB2    | 0.538468667  | 0.100879 | 1.073949011  | 0.00101 | 0.065794815  | 0.841451 |
| RNFT1   | 0.032007847  | 0.788276 | 0.377618035  | 0.00101 | 0.236695801  | 0.040836 |
| CNIH4   | 0.13821574   | 0.199191 | 0.351826269  | 0.00103 | 0.26172072   | 0.014464 |
| ABHD14B | -0.249947634 | 0.092468 | -0.487836776 | 0.00103 | -0.51686496  | 0.000512 |
| KLHL13  | 0.556330419  | 0.184859 | 1.364178568  | 0.00107 | -0.206181918 | 0.625093 |
| DNAH12  | -0.347480261 | 0.398898 | -1.354096275 | 0.00109 | -0.218071729 | 0.592942 |
| RASSF10 | 0.221383412  | 0.398037 | 0.838866477  | 0.00111 | 0.350446789  | 0.176797 |
| SCO2    | 0.171120916  | 0.222413 | 0.44195426   | 0.00112 | 0.190989449  | 0.164762 |
| CBFB    | -0.043763666 | 0.731362 | 0.412444551  | 0.00114 | 0.084165674  | 0.507421 |
| SRI     | 0.071488921  | 0.441755 | 0.299745353  | 0.00114 | 0.157493505  | 0.087616 |
| SDK1    | -0.18345309  | 0.606558 | -1.172259884 | 0.00115 | -0.264161533 | 0.456161 |
| RCAN2   | 0.465216055  | 0.352484 | 1.606592818  | 0.00118 | 0.337660971  | 0.49917  |
| FOXF2   | 0.008438115  | 0.976964 | -0.955340158 | 0.00119 | 0.055716473  | 0.848455 |
| BMP7    | -0.563452767 | 0.089024 | -1.074565632 | 0.00123 | -0.781746724 | 0.018439 |
| PRRG4   | 0.182260217  | 0.229954 | 0.479309541  | 0.00129 | 0.06250761   | 0.678987 |
| MORF4L2 | 0.141942741  | 0.072537 | 0.252689384  | 0.00137 | 0.282678106  | 0.000342 |
| CD47    | 0.062625186  | 0.705152 | 0.52776358   | 0.00141 | 0.230136073  | 0.163918 |
| CRYBG3  | 0.310241816  | 0.094956 | 0.592844572  | 0.0014  | -0.010570871 | 0.95464  |
| BCL2L11 | 0.632092025  | 0.067926 | 1.090751079  | 0.00144 | 0.300193528  | 0.384584 |
| ITM2A   | -0.176070295 | 0.799339 | 2.180326467  | 0.00147 | -1.071961211 | 0.124699 |
| PI4KAP2 | 0.078869234  | 0.531445 | -0.401114661 | 0.00154 | -0.102362862 | 0.414831 |
| LRFN5   | 0.712267757  | 0.065353 | 1.221009333  | 0.00154 | 0.879668883  | 0.022599 |
| CLTC    | 0.094080635  | 0.165668 | 0.213589995  | 0.00161 | 0.123931356  | 0.067418 |
| RNF14   | 0.120240446  | 0.206235 | 0.293692003  | 0.00168 | 0.1572338    | 0.093249 |
| TMED4   | -0.097802093 | 0.221853 | -0.251134713 | 0.0017  | -0.231377402 | 0.003771 |
| EZR     | -0.235790111 | 0.063907 | -0.398750623 | 0.00173 | -0.232263676 | 0.067841 |
| BZW1    | 0.109789623  | 0.212815 | 0.275417282  | 0.00176 | 0.218378495  | 0.013109 |
| RAB9B   | -0.13497279  | 0.561803 | 0.689081636  | 0.00176 | -0.126295419 | 0.581094 |

|            |              |          |              |         |              |          |
|------------|--------------|----------|--------------|---------|--------------|----------|
| APOD       | 1.618384545  | 0.085294 | 2.923266243  | 0.00177 | -0.406227732 | 0.672508 |
| CAPZA1     | 0.077798108  | 0.191138 | 0.185352772  | 0.00177 | 0.17913149   | 0.002493 |
| EDN3       | -0.108935683 | 0.779234 | -1.211904474 | 0.00188 | 0.134900244  | 0.728143 |
| ABCA9      | 0.206712408  | 0.580236 | 1.150197472  | 0.0019  | 0.110150357  | 0.768069 |
| CAPN13     | -0.405066066 | 0.118486 | -0.799549753 | 0.0019  | -0.514145944 | 0.045107 |
| FADD       | 0.017586095  | 0.867493 | 0.316558822  | 0.00195 | 0.127464269  | 0.215845 |
| RNF103     | 0.193955914  | 0.235909 | 0.50248645   | 0.00205 | 0.374486728  | 0.021659 |
| KRBA1      | 0.53476702   | 0.051768 | 0.838835251  | 0.00214 | 0.44440877   | 0.104675 |
| NUAK1      | 0.655521186  | 0.055995 | 1.04461672   | 0.00215 | 0.271571284  | 0.428698 |
| RASL12     | 0.763723199  | 0.167785 | 1.679565144  | 0.00216 | -0.067307896 | 0.904322 |
| PRDX2      | -0.027241015 | 0.743335 | -0.25503837  | 0.00217 | -0.163016574 | 0.049732 |
| FAM26E     | 0.571601548  | 0.180471 | 1.290561194  | 0.0022  | 0.667458042  | 0.115861 |
| IGFN1      | 1.337529812  | 0.246348 | 3.477514175  | 0.00222 | 0.956294684  | 0.412899 |
| KIF12      | -0.486499653 | 0.097325 | -0.897232063 | 0.00225 | -0.170616802 | 0.55548  |
| HOXD10     | -0.151634968 | 0.849192 | -2.481668423 | 0.00226 | -0.720335912 | 0.367413 |
| CTNNA1     | 0.131821373  | 0.096803 | 0.241980753  | 0.00228 | 0.236159784  | 0.002894 |
| ETF1       | 0.138884956  | 0.083166 | 0.243407173  | 0.00228 | 0.425918866  | 8.62E-08 |
| GABRR1     | 0.4136921    | 0.637255 | 2.642499924  | 0.00227 | 0.278964963  | 0.751186 |
| ARHGAP42   | -0.168115148 | 0.114975 | -0.324382496 | 0.00229 | -0.03140737  | 0.766398 |
| MICAL2     | 0.224368473  | 0.304844 | 0.666069306  | 0.00228 | 0.287557842  | 0.188137 |
| SLC29A4    | 0.088786807  | 0.569913 | -0.480947391 | 0.0023  | -0.361215284 | 0.021364 |
| LIMS1      | 0.0610774    | 0.502017 | 0.275760102  | 0.00231 | 0.185724245  | 0.040241 |
| QPRT       | 0.044840622  | 0.65974  | -0.311139498 | 0.00232 | 0.024017273  | 0.812977 |
| CHI3L2     | 0.755184362  | 0.203674 | 1.7445315    | 0.00232 | 0.918953565  | 0.11081  |
| AMIGO2     | 0.215043821  | 0.45399  | 0.87082561   | 0.00234 | -0.121087164 | 0.673488 |
| 2-Sep      | 0.007001011  | 0.897978 | 0.165662532  | 0.00234 | 0.153739494  | 0.004729 |
| P11-497H16 | -0.316649126 | 0.564916 | -1.724474194 | 0.00237 | -0.383290354 | 0.486195 |
| YIPF5      | 0.115324527  | 0.352258 | 0.374780206  | 0.00238 | 0.141513915  | 0.252216 |
| UBE2J2     | 0.187451594  | 0.182253 | 0.423316122  | 0.00244 | 0.111932533  | 0.426823 |
| PCF11      | 0.115022631  | 0.193049 | 0.265889613  | 0.00247 | 0.243723652  | 0.005471 |
| MAL2       | 1.240429701  | 0.13129  | 2.470223117  | 0.00249 | 0.51500845   | 0.531641 |
| ZFP91-CNTF | 1.375755076  | 0.052516 | 2.121399388  | 0.00252 | 0.985857471  | 0.165703 |
| FZD10      | 0.338392924  | 0.47617  | -1.466838131 | 0.00265 | -0.782647102 | 0.10324  |
| SEMA3E     | 0.475098009  | 0.250366 | 1.237101017  | 0.00267 | 0.540233202  | 0.190485 |
| CD180      | 1.067661611  | 0.077525 | 1.757758172  | 0.00272 | 0.943164857  | 0.116423 |
| KIF2A      | 0.094045535  | 0.415494 | 0.343696288  | 0.00276 | 0.299620684  | 0.00897  |
| RAI14      | 0.277816263  | 0.168941 | 0.601543822  | 0.00285 | 0.118283813  | 0.558071 |
| KCNJ2      | 0.819605695  | 0.117635 | 1.541616069  | 0.00291 | -0.262845336 | 0.620845 |
| VRK2       | 0.056682321  | 0.643586 | 0.357897278  | 0.00292 | 0.13999126   | 0.247096 |
| PCDP1      | 0.520316486  | 0.070413 | 0.843633222  | 0.00296 | 1.184579641  | 2.52E-05 |
| NOS3       | -0.146291995 | 0.556673 | -0.743165993 | 0.00299 | -0.725630077 | 0.003553 |
| FADS3      | 0.397983911  | 0.131754 | 0.776739104  | 0.003   | 0.347838426  | 0.188543 |
| OLFM3      | 2.138788175  | 0.115857 | 4.013117196  | 0.00304 | 0.707678386  | 0.605621 |
| UXS1       | 0.179189718  | 0.066808 | 0.287244339  | 0.00305 | 0.276522939  | 0.004268 |
| FBLN2      | 0.544350644  | 0.290764 | 1.518879883  | 0.00308 | 0.058450376  | 0.910516 |
| SUDS3      | -0.131632471 | 0.105206 | -0.238912753 | 0.00313 | -0.076390247 | 0.342854 |
| SYT4       | 1.646673705  | 0.067899 | 2.635885753  | 0.00319 | 1.872542203  | 0.037417 |

|            |              |          |              |         |              |          |
|------------|--------------|----------|--------------|---------|--------------|----------|
| PYGL       | 0.202965964  | 0.18959  | 0.451637202  | 0.00321 | -0.130262925 | 0.400715 |
| RBM11      | 0.598579004  | 0.149285 | 1.180332553  | 0.00326 | 0.377853527  | 0.363695 |
| UBA6       | 0.11611496   | 0.189117 | 0.259078208  | 0.00325 | 0.342670299  | 9.83E-05 |
| PTPLA      | -0.083789358 | 0.768328 | -0.843074315 | 0.00327 | 0.040862616  | 0.884181 |
| CTHRC1     | 0.792584132  | 0.278514 | 2.138037631  | 0.0033  | 0.442296497  | 0.545279 |
| PSME2      | 0.004038203  | 0.968296 | 0.295239847  | 0.0033  | 0.212522112  | 0.034482 |
| P11-848G14 | -0.756556482 | 0.261448 | -2.036828351 | 0.00331 | -0.167305576 | 0.800763 |
| TLR2       | 0.057703951  | 0.800827 | 0.651778041  | 0.00333 | 0.014481073  | 0.949077 |
| TLR3       | -0.224557602 | 0.466822 | 0.889129074  | 0.00334 | -0.51106855  | 0.097463 |
| TTC39C     | -0.188389324 | 0.182398 | -0.415691956 | 0.00334 | -0.106240872 | 0.44753  |
| C11orf84   | 0.065088871  | 0.580712 | -0.34753915  | 0.00338 | -0.034113953 | 0.771534 |
| ARPC5      | 0.097096925  | 0.335741 | 0.294344819  | 0.0034  | 0.242691439  | 0.015661 |
| BLZF1      | -0.077426431 | 0.373882 | 0.247852573  | 0.00342 | 0.159963626  | 0.059322 |
| KAT6B      | -0.070861093 | 0.492139 | -0.30186577  | 0.00345 | -0.174587112 | 0.088349 |
| BMPER      | 1.156720137  | 0.067645 | 1.842934385  | 0.00348 | 0.039623297  | 0.950419 |
| C19orf33   | -0.288377036 | 0.079499 | -0.480397945 | 0.00349 | -0.608936263 | 0.000219 |
| TRAFD1     | 0.163350442  | 0.160377 | 0.336227375  | 0.00347 | 0.475036069  | 3.45E-05 |
| PTPN2      | 0.176014633  | 0.09821  | 0.308211662  | 0.00353 | 0.392750031  | 0.000195 |
| ATG4A      | 0.171013842  | 0.35807  | 0.535864312  | 0.00356 | 0.297986464  | 0.106168 |
| CCDC53     | -0.085992562 | 0.510225 | 0.369328701  | 0.00358 | -0.02038422  | 0.874116 |
| CREBL2     | -0.063155697 | 0.545419 | 0.296718675  | 0.00359 | -0.039102422 | 0.704553 |
| PPP1R14C   | 1.104871615  | 0.132702 | 2.110219028  | 0.0036  | -0.628905092 | 0.411579 |
| SLC26A11   | 0.365082141  | 0.059773 | 0.56044914   | 0.00361 | 0.480611707  | 0.012682 |
| PSAPL1     | -0.26165663  | 0.428763 | -0.965581365 | 0.00366 | -0.564417309 | 0.087996 |
| ANKRD13A   | 0.043636479  | 0.673935 | 0.297609393  | 0.00383 | 0.241025162  | 0.018966 |
| HIGD2A     | -0.09053088  | 0.389317 | -0.303862939 | 0.00391 | -0.226825003 | 0.030306 |
| CDC42SE2   | 0.104696698  | 0.273922 | 0.274337596  | 0.00394 | 0.309467295  | 0.001132 |
| VMP1       | 0.220557553  | 0.060943 | 0.339175809  | 0.00394 | 0.31435937   | 0.007513 |
| TRAPPC2    | -0.207973803 | 0.085724 | -0.345634164 | 0.00398 | -0.266696787 | 0.025683 |
| TACC1      | -0.23433085  | 0.203009 | -0.529410039 | 0.00401 | 0.069294059  | 0.706068 |
| PROCR      | -0.118996176 | 0.781029 | 1.193014047  | 0.00412 | -0.176695756 | 0.678218 |
| KCNH2      | 0.237873777  | 0.169907 | -0.507705585 | 0.00415 | 0.040656015  | 0.814518 |
| NUDC       | -0.10575388  | 0.314159 | -0.300326819 | 0.00426 | -0.21693405  | 0.038537 |
| POMP       | -0.10899134  | 0.148199 | 0.211062479  | 0.00432 | 0.168396891  | 0.022729 |
| EDN1       | 0.282459286  | 0.301005 | 0.768581099  | 0.00433 | 0.416388749  | 0.124189 |
| MUSK       | -0.43789667  | 0.30535  | -1.26633473  | 0.00435 | -0.199214005 | 0.623823 |
| RAB3B      | -0.165554381 | 0.542631 | -0.775686569 | 0.00436 | -0.051533561 | 0.849637 |
| HPSE2      | -0.01179959  | 0.96479  | -0.76688182  | 0.00439 | -0.060715908 | 0.819992 |
| PBX4       | -0.124086163 | 0.678478 | -0.921991049 | 0.00437 | -0.792178536 | 0.011478 |
| AKT3       | -0.006790108 | 0.976326 | 0.645576639  | 0.00442 | 0.472652055  | 0.037212 |
| FOXF1      | 0.453828413  | 0.073881 | -0.725993123 | 0.00444 | 0.248694166  | 0.327299 |
| B2M        | 0.244245261  | 0.07971  | 0.396031436  | 0.00448 | 0.238731728  | 0.086694 |
| LHFP       | 0.759089772  | 0.070732 | 1.190846054  | 0.00448 | -0.005191956 | 0.990166 |
| TPBG       | 0.241249323  | 0.236186 | 0.575542281  | 0.00452 | 0.083870758  | 0.680223 |
| GRIA4      | 0.161323844  | 0.656734 | -1.040067281 | 0.00454 | 0.174253394  | 0.630379 |
| ARHGAP4    | -0.459564863 | 0.152268 | -0.905667603 | 0.00463 | -1.310684957 | 7.32E-05 |
| CD82       | 0.4325099    | 0.107291 | 0.750304192  | 0.00467 | -0.422393148 | 0.118237 |

|            |              |          |              |         |              |          |
|------------|--------------|----------|--------------|---------|--------------|----------|
| CDK17      | 0.236352158  | 0.092225 | 0.394830365  | 0.00467 | 0.632277284  | 5.44E-06 |
| PYGM       | 0.480848757  | 0.202682 | 1.041899097  | 0.0047  | 0.352534849  | 0.352423 |
| SLC36A4    | 0.088460986  | 0.492101 | 0.36113362   | 0.00471 | 0.456781153  | 0.000331 |
| MMP13      | 0.824414448  | 0.314446 | 2.290463039  | 0.00473 | -0.922306901 | 0.276692 |
| AHCYL1     | 0.201730589  | 0.082319 | 0.32641935   | 0.00483 | 0.27807219   | 0.016415 |
| GREM1      | 0.452449027  | 0.257331 | 1.121416852  | 0.00484 | 1.086857801  | 0.006327 |
| ZNF678     | -0.201746674 | 0.128268 | -0.371817279 | 0.00486 | 0.0099224    | 0.939748 |
| DLC1       | 0.528661712  | 0.083642 | 0.859048282  | 0.00487 | 0.142593175  | 0.640844 |
| RBM18      | 0.065582384  | 0.600323 | 0.347616231  | 0.00498 | 0.131215922  | 0.288781 |
| RPL38      | 0.26035736   | 0.054046 | 0.378371377  | 0.00509 | 0.214133672  | 0.112961 |
| AP5M1      | 0.108481069  | 0.380215 | 0.344111242  | 0.00516 | 0.16329746   | 0.18425  |
| HNRNPA3P9  | 0.467022347  | 0.239179 | 1.047701697  | 0.00519 | 1.22084776   | 0.000962 |
| NMB        | 0.464483623  | 0.051286 | 0.657254656  | 0.00524 | 0.233199929  | 0.327679 |
| EI24       | 0.142261517  | 0.283406 | 0.36924142   | 0.00525 | 0.196564801  | 0.13763  |
| ELTD1      | 0.433494562  | 0.344516 | 1.243281667  | 0.00525 | -0.169939556 | 0.714764 |
| CYP2S1     | -0.24535691  | 0.289681 | -0.648704754 | 0.00527 | -1.104995915 | 2.22E-06 |
| MTG1       | 0.074876185  | 0.523464 | 0.323323758  | 0.00532 | 0.163985577  | 0.157762 |
| BICC1      | 0.357686371  | 0.196507 | 0.77019802   | 0.00534 | 0.326724994  | 0.23784  |
| DPYSL3     | 0.221662627  | 0.691485 | 1.551521909  | 0.00539 | -0.30545555  | 0.584539 |
| CCND2      | -0.040641828 | 0.73989  | -0.340346109 | 0.00544 | -0.226132813 | 0.064679 |
| CDH2       | 0.437539042  | 0.33701  | 1.264975604  | 0.00546 | 0.537885993  | 0.237695 |
| DCHS2      | 0.890459756  | 0.105176 | 1.515154528  | 0.00548 | 0.229539962  | 0.680864 |
| MAB21L1    | 0.622603724  | 0.454876 | 2.260332335  | 0.00552 | 0.757621527  | 0.359756 |
| FAM175A    | -0.147597253 | 0.14948  | -0.282006655 | 0.00558 | -0.035759198 | 0.72181  |
| DUSP11     | -0.004230028 | 0.968874 | 0.292876492  | 0.00561 | 0.188513842  | 0.074439 |
| SETDB1     | -0.146038105 | 0.13796  | -0.272464103 | 0.00561 | -0.082067098 | 0.401548 |
| ANKRD20A5I | -0.43557412  | 0.393213 | -1.44208762  | 0.00566 | -0.724880075 | 0.156962 |
| EPSTI1     | 0.085414728  | 0.792181 | 0.884228723  | 0.00572 | 0.367694322  | 0.251623 |
| NASP       | -0.199502537 | 0.17917  | -0.410343773 | 0.00572 | -0.161990388 | 0.274549 |
| TMEM183A   | -0.017317186 | 0.829633 | 0.219436022  | 0.00579 | 0.135792379  | 0.088024 |
| ITGB5      | -0.245665188 | 0.111932 | -0.426251686 | 0.00582 | -0.460089396 | 0.002913 |
| KCTD20     | 0.03174361   | 0.729008 | 0.25060143   | 0.00585 | 0.219332787  | 0.016026 |
| KCTD1      | -0.195346291 | 0.301185 | -0.521604393 | 0.00586 | -0.41791028  | 0.02693  |
| HGF        | 1.080246093  | 0.111344 | 1.866723806  | 0.00591 | -0.076086359 | 0.910813 |
| MICAL3     | 0.293761737  | 0.062556 | 0.432823792  | 0.00591 | -0.025801123 | 0.870111 |
| SGCB       | -0.006713221 | 0.96633  | 0.433232638  | 0.00597 | 0.072852525  | 0.644913 |
| KIAA1958   | 0.039690075  | 0.782858 | -0.396525109 | 0.00598 | -0.134173673 | 0.348653 |
| HTR2A      | 0.268127306  | 0.479741 | -1.075577167 | 0.00602 | 0.677949019  | 0.071261 |
| SLC8A1     | 0.091365388  | 0.787176 | -0.93181229  | 0.00612 | 0.381932705  | 0.258404 |
| E2F5       | -0.267729669 | 0.125297 | -0.477009931 | 0.00615 | -0.166449038 | 0.337078 |
| NSUN6      | -0.291791736 | 0.067904 | -0.437516078 | 0.00617 | -0.152669574 | 0.332733 |
| PTGES2     | 0.321553033  | 0.058675 | 0.463379005  | 0.00618 | 0.350651514  | 0.03852  |
| FOS        | -0.224929535 | 0.311774 | -0.608677235 | 0.00622 | -0.290965898 | 0.190186 |
| PHF10      | 0.607093179  | 0.217678 | 1.34028776   | 0.00623 | 0.981659708  | 0.045502 |
| METTL7A    | -0.352151296 | 0.053038 | -0.49733355  | 0.00627 | -0.633925895 | 0.000496 |
| RAP2A      | -0.02820837  | 0.706918 | 0.202368846  | 0.00627 | 0.1267126    | 0.086965 |
| CP         | 0.197248342  | 0.389479 | 0.624751251  | 0.00641 | 0.421709537  | 0.065745 |

|           |              |          |              |         |              |          |
|-----------|--------------|----------|--------------|---------|--------------|----------|
| MRPS6     | 0.11393956   | 0.21485  | 0.247663871  | 0.00645 | 0.028733188  | 0.753277 |
| EMP1      | 0.49979173   | 0.353823 | 1.464428482  | 0.00652 | -0.022496581 | 0.966712 |
| PFKFB2    | 0.160995511  | 0.349909 | 0.465864427  | 0.00658 | 0.241310364  | 0.161016 |
| CMYA5     | 0.445938584  | 0.336734 | 1.24365031   | 0.0066  | 0.151075531  | 0.744562 |
| TGFB2     | 1.336325584  | 0.086111 | 2.113131942  | 0.00661 | 0.885141282  | 0.255793 |
| COL16A1   | 0.534366699  | 0.090504 | 0.855693538  | 0.00668 | 0.305254644  | 0.333643 |
| ABCG1     | 0.462455461  | 0.254966 | 1.093533217  | 0.00675 | -0.018572417 | 0.963707 |
| SOCS5     | 0.20313807   | 0.168293 | 0.397325392  | 0.00676 | 0.294312457  | 0.04496  |
| BOC       | 0.733797038  | 0.118121 | 1.269254215  | 0.00678 | -0.073488755 | 0.875784 |
| SORCS3    | 2.093254353  | 0.165141 | 4.061760588  | 0.00682 | -1.741538755 | 0.292776 |
| IFI44L    | 0.293844032  | 0.463716 | 1.073578565  | 0.00691 | -0.337920405 | 0.401081 |
| CYP27C1   | 0.325554339  | 0.229309 | 0.719444813  | 0.00698 | 0.435385354  | 0.104686 |
| IL10      | 0.469408938  | 0.378218 | 1.33643219   | 0.00711 | 0.771585358  | 0.129184 |
| TLR5      | 0.341749318  | 0.432631 | 1.150611799  | 0.00712 | 0.574870673  | 0.187415 |
| OXSR1     | -0.128332576 | 0.25458  | -0.302149479 | 0.00727 | -0.063544084 | 0.571252 |
| EEF1A1P17 | 0.831615648  | 0.142799 | 1.442037183  | 0.00732 | 1.348977012  | 0.012256 |
| CAPN5     | -0.157759484 | 0.32701  | -0.431767831 | 0.00735 | -0.60965592  | 0.000158 |
| SPHK1     | 0.726663312  | 0.105185 | 1.191129397  | 0.00741 | 0.517340498  | 0.249972 |
| TIMP1     | -0.063288401 | 0.791798 | 0.640100335  | 0.00756 | -0.31792282  | 0.184818 |
| RAB32     | 0.230593014  | 0.186824 | 0.458007091  | 0.00759 | 0.507807985  | 0.00296  |
| SAMHD1    | -0.047832814 | 0.754127 | 0.396947985  | 0.00767 | -0.046870451 | 0.755999 |
| SOCS6     | 0.095311466  | 0.368269 | 0.279909342  | 0.00768 | 0.196251058  | 0.061287 |
| KCNK2     | 0.208097817  | 0.632438 | 1.153698838  | 0.00774 | 0.7142947    | 0.09947  |
| EEF1A1P38 | 0.77193316   | 0.138693 | 1.311848222  | 0.00776 | 0.490367018  | 0.349074 |
| RPL32P29  | -0.305810542 | 0.108403 | -0.507443356 | 0.00778 | -0.230827675 | 0.219597 |
| CLN6      | -0.109682356 | 0.411992 | -0.353374627 | 0.00786 | -0.42380095  | 0.001424 |
| CMPK1     | 0.040575572  | 0.763883 | 0.358372811  | 0.00787 | 0.220272915  | 0.102511 |
| CCDC82    | 0.178159253  | 0.153147 | 0.328509919  | 0.00791 | 0.475911474  | 0.000112 |
| IFI35     | -0.01283871  | 0.938863 | 0.431852211  | 0.00792 | -0.054156124 | 0.744897 |
| KCNJ15    | -0.140845967 | 0.791741 | 1.405294707  | 0.00791 | 0.049084495  | 0.926379 |
| POSTN     | 0.494558686  | 0.296559 | 1.257921392  | 0.00792 | 0.122154932  | 0.796544 |
| NOV       | 0.193393459  | 0.716053 | 1.330295629  | 0.008   | 0.280580978  | 0.590202 |
| PPP3CA    | -0.032240377 | 0.779694 | 0.304457497  | 0.00799 | 0.135081083  | 0.240155 |
| STX7      | 0.281638644  | 0.054071 | 0.386692853  | 0.008   | 0.538426531  | 0.000221 |
| CCDC85C   | -0.261413927 | 0.087864 | -0.405518934 | 0.00801 | -0.444369512 | 0.003629 |
| IGSF9     | -0.432738801 | 0.089207 | -0.675003073 | 0.00806 | -1.248971066 | 1.17E-06 |
| TSC22D1   | 0.11425778   | 0.518546 | -0.469086113 | 0.00806 | -0.201976083 | 0.253653 |
| RARRES2   | 0.271495421  | 0.262677 | 0.632228888  | 0.00807 | -0.044381025 | 0.854967 |
| BNIP3L    | 0.250936786  | 0.058403 | 0.350519912  | 0.00814 | 0.327156307  | 0.013511 |
| C9orf72   | -0.194790758 | 0.26191  | -0.459694176 | 0.00811 | 0.123999218  | 0.471628 |
| CARD6     | 0.129961696  | 0.325764 | 0.344711343  | 0.00813 | 0.284944187  | 0.028867 |
| CCBL1     | -0.267705951 | 0.283156 | -0.670603601 | 0.00812 | -0.274973092 | 0.269499 |
| LPAR2     | 0.055920386  | 0.714004 | -0.407117481 | 0.00809 | -0.165116265 | 0.278534 |
| ANKH      | 0.426219703  | 0.224781 | 0.925409025  | 0.00829 | -0.004621552 | 0.989509 |
| RER1      | 0.067332354  | 0.552201 | 0.297342999  | 0.00828 | 0.057433403  | 0.611262 |
| RWDD4P2   | 1.147409212  | 0.071901 | 1.671835818  | 0.0083  | 1.753534921  | 0.005587 |
| C1QL1     | 0.72898455   | 0.088971 | -1.345629924 | 0.00832 | -0.699588428 | 0.135285 |



|          |              |          |              |         |              |          |
|----------|--------------|----------|--------------|---------|--------------|----------|
| EMCN     | 0.52259183   | 0.374831 | 1.549753207  | 0.00834 | -0.032915778 | 0.955459 |
| TNFRSF8  | 1.083050794  | 0.258464 | 2.457877234  | 0.00841 | 0.200563965  | 0.837388 |
| FLRT3    | 0.23266961   | 0.148132 | 0.423024859  | 0.00845 | 0.347142044  | 0.030699 |
| CNTNAP5  | 0.275821937  | 0.783949 | 2.489833596  | 0.00847 | 1.231160976  | 0.196987 |
| SLC1A3   | -0.389068785 | 0.195171 | -0.792985544 | 0.00847 | -0.821831631 | 0.006295 |
| SCYL2    | 0.11935455   | 0.287794 | 0.294841373  | 0.0085  | 0.242894057  | 0.030035 |
| KIAA1462 | 0.572925497  | 0.084698 | 0.872626279  | 0.00853 | 0.326764818  | 0.325518 |
| LST1     | 0.031601891  | 0.961732 | 1.649254298  | 0.00858 | 0.489345791  | 0.4572   |
| MXRA5    | 0.813350218  | 0.15019  | 1.484973984  | 0.0086  | 0.107025922  | 0.849856 |
| TECRL    | 0.550437171  | 0.263405 | 1.271069463  | 0.00864 | 0.914735831  | 0.059928 |
| ANKRD45  | -0.221535128 | 0.421373 | -0.726880571 | 0.00875 | -0.331540325 | 0.227643 |
| DEF8     | 0.291425554  | 0.235619 | 0.641061945  | 0.00875 | 0.458543926  | 0.060923 |
| ALDH3A1  | -0.818530018 | 0.151831 | -1.49842055  | 0.00885 | -1.788789399 | 0.002135 |
| EYA4     | 1.1637396    | 0.100192 | 1.841229713  | 0.00895 | -0.094536407 | 0.894536 |
| CTBP2P8  | -0.372807928 | 0.497351 | -1.579743598 | 0.00919 | -0.561408477 | 0.305154 |
| GPR39    | -0.401405387 | 0.08913  | -0.614731439 | 0.00918 | -0.757170435 | 0.001396 |
| EIF4E2   | -0.081974503 | 0.416124 | 0.259810941  | 0.00926 | 0.133332806  | 0.182368 |
| FGFR3    | -0.293167565 | 0.087937 | -0.445898602 | 0.00928 | -0.63897425  | 0.000195 |
| MEOX2    | 0.00682137   | 0.992464 | 1.859801536  | 0.00929 | -0.75339939  | 0.299604 |
| MTERFD3  | -0.241635745 | 0.108781 | -0.390591258 | 0.00932 | -0.117553427 | 0.425776 |
| SLC4A2   | 0.243806197  | 0.110587 | 0.396069121  | 0.00937 | 0.193592272  | 0.204398 |
| ADPGK    | -0.071274422 | 0.558623 | 0.314129065  | 0.00943 | 0.052504658  | 0.664286 |
| TRIM27   | 0.319730205  | 0.072807 | 0.462082437  | 0.00946 | 0.566741911  | 0.00144  |
| COMMD2   | -0.019277081 | 0.852758 | 0.265923539  | 0.0095  | 0.177666456  | 0.082528 |
| ARL2     | -0.21232464  | 0.142035 | -0.372914921 | 0.00958 | -0.209441077 | 0.145299 |
| BCHE     | -0.481506106 | 0.183765 | -0.939235535 | 0.00962 | 0.250311168  | 0.488568 |
| IFT140   | -0.221606405 | 0.113004 | -0.360038815 | 0.00963 | -0.250565472 | 0.071275 |
| ATP6V1B2 | 0.091625582  | 0.285016 | 0.219200522  | 0.00967 | 0.265165105  | 0.001694 |
| CHODL    | -0.642326531 | 0.243221 | -1.425648553 | 0.00966 | -0.479097823 | 0.383839 |
| MRAS     | 0.080951628  | 0.873837 | 1.287947647  | 0.00971 | 0.795689443  | 0.11042  |
| XPC      | -0.278079958 | 0.074673 | -0.400636898 | 0.00983 | -0.136059191 | 0.380713 |
| PRPF38A  | -0.014836286 | 0.851384 | 0.202227491  | 0.0099  | 0.255262927  | 0.001026 |
| SLC27A1  | 0.106410455  | 0.461268 | -0.376824932 | 0.00999 | -0.177068214 | 0.221268 |
| LUC7L3   | -0.068516865 | 0.642348 | -0.379917399 | 0.01    | 0.273930292  | 0.062727 |
| ANGPTL3  | -0.628271677 | 0.119084 | -1.041400504 | 0.01005 | -0.358695101 | 0.366448 |
| IPCEF1   | 0.755051056  | 0.134463 | 1.286658903  | 0.01009 | 1.291275819  | 0.009752 |
| LSAMP    | 0.148731047  | 0.468025 | -0.530316422 | 0.01013 | 0.119705956  | 0.558647 |
| PDGFB    | 0.681707612  | 0.323985 | 1.769591465  | 0.01013 | -0.608245641 | 0.382681 |
| IGFBP4   | 0.450502403  | 0.123478 | 0.749296429  | 0.01016 | -0.027256718 | 0.925898 |
| GNAI3    | 0.071324122  | 0.245907 | 0.156935798  | 0.01024 | 0.187491744  | 0.002126 |
| TAC1     | 0.929429781  | 0.471639 | 3.309563851  | 0.01027 | 0.70060817   | 0.587439 |
| ETV4     | -0.103221887 | 0.580773 | -0.480043579 | 0.01033 | -0.184788557 | 0.321847 |
| GALNT4   | 0.015132007  | 0.927712 | 0.426612875  | 0.01036 | 0.516187352  | 0.001914 |
| PBX1     | 0.161165389  | 0.290651 | -0.392733227 | 0.01035 | -0.166411895 | 0.275813 |
| ADAM23   | 0.508432676  | 0.125729 | 0.849550075  | 0.01042 | 0.398425546  | 0.230699 |
| CYP1B1   | 1.0163222    | 0.085229 | 1.502585653  | 0.01047 | 0.095683975  | 0.872763 |
| HPN      | -0.257715209 | 0.273839 | -0.603407929 | 0.01048 | -0.381333627 | 0.105293 |

|          |              |          |              |         |              |          |
|----------|--------------|----------|--------------|---------|--------------|----------|
| DLG3     | 0.105343045  | 0.433984 | 0.342959182  | 0.01054 | 0.232780227  | 0.082512 |
| VEZT     | 0.058278016  | 0.543691 | 0.244580456  | 0.01054 | 0.319372651  | 0.000825 |
| MINA     | 0.079156841  | 0.643699 | 0.433902161  | 0.01057 | 0.066531143  | 0.696412 |
| NFE2     | -0.89945116  | 0.059266 | -1.218958539 | 0.01057 | -1.029180006 | 0.030228 |
| IGDCC3   | 0.465707172  | 0.099859 | -0.727998491 | 0.01061 | 0.243839635  | 0.388679 |
| BIN1     | -0.187793218 | 0.095111 | -0.286925086 | 0.01067 | -0.465435999 | 3.65E-05 |
| STRN     | 0.128400041  | 0.244973 | 0.280087615  | 0.01071 | 0.270497055  | 0.01359  |
| YWHAB    | 0.07448237   | 0.357115 | 0.205406528  | 0.01083 | 0.121347658  | 0.132374 |
| PCED1B   | 0.441849942  | 0.184981 | 0.827862799  | 0.011   | -0.105927601 | 0.753877 |
| ZFP91    | -0.119996516 | 0.080674 | -0.174002057 | 0.01102 | -0.022531941 | 0.7408   |
| STEAP1   | -0.194861317 | 0.329589 | 0.499379997  | 0.01127 | -0.051821976 | 0.794023 |
| ITPRIPL2 | 0.214274727  | 0.139862 | 0.366234713  | 0.01142 | -0.047417865 | 0.743904 |
| SRP54    | 0.049952436  | 0.581753 | 0.227617904  | 0.01142 | 0.277474573  | 0.002005 |
| CASZ1    | 0.512429049  | 0.087637 | 0.759576426  | 0.01148 | 0.527549895  | 0.079688 |
| TRAM1    | 0.099935024  | 0.450406 | 0.334403881  | 0.01147 | 0.121748972  | 0.35749  |
| CLCN7    | 0.194884719  | 0.168779 | 0.355748524  | 0.0116  | -0.068911634 | 0.627604 |
| PTPRN2   | -0.155614985 | 0.556284 | -0.668818485 | 0.01168 | -0.839436795 | 0.001571 |
| AKR1B10  | -1.28847867  | 0.068896 | -1.789499217 | 0.01181 | -2.254661201 | 0.001543 |
| DNM3     | 0.170063542  | 0.667586 | 0.991611738  | 0.01181 | -0.236289122 | 0.551813 |
| MBOAT1   | -0.04387728  | 0.78598  | 0.402603181  | 0.01183 | -0.096631884 | 0.548459 |
| UPF3B    | -0.076574078 | 0.668059 | -0.452134018 | 0.01186 | -0.155442948 | 0.382525 |
| DHTKD1   | -0.092135236 | 0.570016 | -0.407206405 | 0.01189 | -0.235919644 | 0.144684 |
| FRZB     | -0.161708658 | 0.487274 | -0.586970123 | 0.01188 | 0.148427036  | 0.522007 |
| SIDT2    | 0.221342221  | 0.443641 | -0.730654607 | 0.01191 | -0.052336574 | 0.856409 |
| SGALNACT | 0.369228872  | 0.050732 | 0.472079105  | 0.01195 | 0.142941398  | 0.449305 |
| AQP12A   | -0.181868783 | 0.678211 | -1.157367617 | 0.012   | -1.063288365 | 0.019501 |
| NTHL1    | -0.232702667 | 0.208921 | -0.464926846 | 0.01201 | -0.433516963 | 0.018032 |
| ENTPD2   | -0.476575208 | 0.399102 | -1.486500253 | 0.0121  | -0.868578209 | 0.128116 |
| ENG      | 0.605495674  | 0.082573 | 0.867423907  | 0.01212 | -0.480797703 | 0.17426  |
| BCL2L13  | -0.052881575 | 0.673265 | -0.313065896 | 0.01218 | -0.029341776 | 0.814085 |
| PLSCR4   | 0.474319768  | 0.125081 | 0.770613916  | 0.01219 | 0.42995111   | 0.163384 |
| MGP      | 0.083069455  | 0.907367 | 1.786201279  | 0.01221 | -0.328319816 | 0.645713 |
| PER3     | -0.057873618 | 0.889057 | -1.095401045 | 0.01221 | -0.084609902 | 0.838773 |
| ABHD11   | -0.140550186 | 0.330199 | -0.360848251 | 0.01225 | -0.394972991 | 0.006232 |
| NALCN    | 0.25415283   | 0.585939 | 1.130265855  | 0.01233 | -0.146979362 | 0.754298 |
| NGFR     | 0.700029252  | 0.308942 | 1.709079403  | 0.01233 | -0.062346133 | 0.928206 |
| NSUN5P2  | -0.48541238  | 0.235051 | -1.027456244 | 0.01239 | -1.333101221 | 0.001322 |
| UBLCP1   | 0.085313806  | 0.427293 | 0.26477071   | 0.01238 | 0.202779015  | 0.055135 |
| TRPV6    | 1.86075366   | 0.054724 | 2.350500754  | 0.01249 | 2.357879853  | 0.011851 |
| CHTF18   | -0.261788815 | 0.221354 | -0.534041322 | 0.01251 | -0.472121568 | 0.027885 |
| NPY1R    | 1.151060219  | 0.096875 | 1.7264462    | 0.01251 | 0.51583757   | 0.457228 |
| C18orf8  | 0.269902279  | 0.067144 | 0.364590516  | 0.01254 | 0.299006188  | 0.040726 |
| D2HGDH   | -0.401867972 | 0.136809 | -0.673540168 | 0.01253 | -0.625833087 | 0.020842 |
| PDE3B    | -0.146234636 | 0.548641 | -0.608834696 | 0.01256 | -0.15273224  | 0.530342 |
| IQSEC2   | -0.389749045 | 0.202553 | -0.774375053 | 0.01261 | -0.932478917 | 0.002622 |
| DCAF16   | -0.087980841 | 0.362734 | -0.24046016  | 0.01265 | -0.051605266 | 0.591041 |
| ACY1     | -0.080716855 | 0.679485 | -0.487219088 | 0.0128  | -0.261304997 | 0.18088  |

|            |              |          |              |         |              |          |
|------------|--------------|----------|--------------|---------|--------------|----------|
| TP53TG5    | 0.537820956  | 0.165875 | 0.962076703  | 0.01291 | 0.173158411  | 0.657572 |
| IDUA       | -0.06169419  | 0.788722 | -0.580702626 | 0.01305 | -0.708633058 | 0.002773 |
| PTCHD4     | -0.325429286 | 0.349644 | -0.869111639 | 0.01304 | -0.687884753 | 0.048454 |
| TMEM87B    | -0.039538033 | 0.740118 | 0.293931855  | 0.01321 | -0.130602015 | 0.271647 |
| AKTIP      | 0.019508775  | 0.896422 | 0.363814887  | 0.01326 | 0.249454465  | 0.08991  |
| PSMB2      | 0.116170829  | 0.235147 | 0.239544169  | 0.01325 | 0.152788205  | 0.114541 |
| BNC2       | 0.558835368  | 0.09057  | 0.815967173  | 0.0134  | 0.239387071  | 0.468517 |
| IAJC25-GNC | 0.099153294  | 0.702317 | 0.636669602  | 0.01346 | 0.714870344  | 0.005479 |
| HDAC4      | 0.389581444  | 0.102962 | 0.589116373  | 0.01361 | 0.446601761  | 0.061286 |
| P11-603J24 | 0.54488976   | 0.095661 | 0.803573968  | 0.01364 | 0.695819758  | 0.032763 |
| CHD6       | -0.260275279 | 0.060455 | -0.341454845 | 0.0137  | -0.151129748 | 0.275303 |
| LARGE      | 0.157237492  | 0.204646 | 0.304123948  | 0.01369 | 0.044103175  | 0.721745 |
| P11-814E24 | 0.246286316  | 0.683863 | -1.674839004 | 0.01373 | 0.197019426  | 0.742915 |
| PRG4       | -0.507611767 | 0.466882 | 1.542108502  | 0.01375 | -0.6081229   | 0.366706 |
| ACVR2B     | -0.073579232 | 0.566674 | -0.316433822 | 0.01381 | 0.091381843  | 0.474678 |
| CSNK1A1    | -0.047287081 | 0.486771 | 0.166737139  | 0.01382 | 0.177566863  | 0.008729 |
| NEIL2      | -0.062292196 | 0.704389 | 0.39516112   | 0.0138  | 0.031205292  | 0.847561 |
| NOL8       | -0.191067388 | 0.262205 | -0.418456038 | 0.01382 | 0.023687323  | 0.888842 |
| VWC2       | 0.001438307  | 0.998606 | 1.990752847  | 0.0138  | -1.01691078  | 0.224256 |
| SLC25A23   | 0.152229393  | 0.153252 | -0.26406731  | 0.01389 | -0.014080771 | 0.89496  |
| ATF3       | 0.108385622  | 0.820429 | -1.186810158 | 0.01391 | 0.154464387  | 0.746011 |
| SUCNR1     | 0.813881328  | 0.410609 | 2.426522016  | 0.01396 | -0.057609597 | 0.953629 |
| ATP6V0E1   | 0.173303788  | 0.14916  | 0.294045011  | 0.01402 | 0.18131766   | 0.130098 |
| NUDT22     | 0.205811595  | 0.118391 | 0.32007551   | 0.014   | -0.033552168 | 0.79977  |
| PDXDC2P    | -0.262929822 | 0.093162 | -0.38255258  | 0.01402 | -0.019787124 | 0.897743 |
| SESN2      | -0.076746932 | 0.660635 | -0.430607961 | 0.01403 | -0.248373662 | 0.154938 |
| IFIT3      | 0.530275512  | 0.062165 | 0.691433384  | 0.01413 | 0.771595868  | 0.006026 |
| CCNB1IP1   | -0.210030025 | 0.086747 | -0.300269223 | 0.01418 | -0.075794831 | 0.533868 |
| EFHD2      | 0.344144181  | 0.096936 | 0.507142703  | 0.01427 | -0.192763655 | 0.353889 |
| TCEB1      | 0.102110319  | 0.321891 | 0.250341051  | 0.01431 | 0.250857067  | 0.013988 |
| CERS6      | 0.033768515  | 0.745119 | 0.253414694  | 0.01441 | 0.094848941  | 0.360098 |
| CYP2W1     | -0.057576949 | 0.859529 | -0.813668445 | 0.01445 | -0.838458575 | 0.012379 |
| HOXA13     | -1.155377272 | 0.227358 | -2.37484748  | 0.01446 | 0.071550845  | 0.940023 |
| ATRX       | -0.125205369 | 0.119641 | -0.196270052 | 0.0146  | -0.044017096 | 0.58291  |
| COL27A1    | -0.0542723   | 0.711341 | -0.35822968  | 0.01462 | -0.038939629 | 0.790341 |
| CASP1      | 0.312590562  | 0.465943 | 1.025100395  | 0.01467 | 0.465273572  | 0.265935 |
| LHX8       | 0.395252382  | 0.789549 | 3.505708275  | 0.01474 | -1.621468651 | 0.307811 |
| ZNF557     | 0.087019415  | 0.423456 | 0.261825972  | 0.01473 | 0.287290772  | 0.007021 |
| FAM43A     | 0.867405465  | 0.066646 | 1.146221333  | 0.0148  | 0.056032105  | 0.906597 |
| HELLS      | 0.09241999   | 0.68352  | 0.551715718  | 0.01481 | 0.129445294  | 0.567752 |
| CHN2       | -0.217175021 | 0.243497 | -0.452316039 | 0.0149  | -0.276304833 | 0.134629 |
| CHST4      | 0.44118773   | 0.205778 | 0.830535338  | 0.01496 | 0.865787494  | 0.011107 |
| MBTPS1     | 0.063047385  | 0.386401 | 0.176050513  | 0.01495 | -0.002240293 | 0.975326 |
| PARD6B     | -0.234492843 | 0.114284 | -0.360992845 | 0.01495 | -0.120211836 | 0.415891 |
| P11-1055B8 | -0.25338035  | 0.853405 | -3.380169838 | 0.01508 | -1.156105545 | 0.399772 |
| PALMD      | 0.63923237   | 0.130562 | 1.02384539   | 0.01514 | 0.372838145  | 0.37793  |
| GRPEL2     | -0.170609256 | 0.093295 | -0.245552983 | 0.01516 | -0.021169762 | 0.832305 |

|            |              |          |              |         |              |          |
|------------|--------------|----------|--------------|---------|--------------|----------|
| FAM86EP    | -0.404259639 | 0.151027 | -0.697611677 | 0.01522 | -0.992548875 | 0.000527 |
| TENM4      | 0.255989882  | 0.542676 | -1.027757813 | 0.01522 | -0.208948696 | 0.622993 |
| HOXD11     | -0.540673228 | 0.550214 | -2.26130164  | 0.01535 | -1.126664718 | 0.215692 |
| PFAS       | 0.039995239  | 0.798977 | -0.380672153 | 0.01536 | -0.039868133 | 0.799183 |
| FOXS1      | 1.401571841  | 0.103067 | 2.059552308  | 0.01542 | -0.349873154 | 0.696934 |
| RGL2       | 0.023378623  | 0.822932 | -0.252815253 | 0.01542 | -0.230844586 | 0.026727 |
| EOGT       | 0.088479247  | 0.533137 | 0.333507485  | 0.01548 | 0.12916342   | 0.353425 |
| MEOX1      | 1.440352604  | 0.060614 | 1.852764205  | 0.01561 | 0.67949779   | 0.376706 |
| SLFN11     | 0.400330539  | 0.303666 | 0.939666997  | 0.01561 | 0.097418023  | 0.802324 |
| CHRM3      | -0.477765406 | 0.167454 | -0.834996463 | 0.01586 | -1.305714814 | 0.000171 |
| TPGS2      | -0.008755959 | 0.925336 | -0.225355015 | 0.01586 | -0.081144974 | 0.383279 |
| AC140481.2 | -0.363199961 | 0.402974 | -1.126102139 | 0.0159  | -0.124619144 | 0.763728 |
| NFIL3      | -0.193315648 | 0.392337 | -0.54514243  | 0.01598 | -0.007082654 | 0.974938 |
| SART3      | -0.088294068 | 0.232902 | -0.177074495 | 0.01596 | -0.050493312 | 0.489383 |
| ZNF518B    | 0.158462321  | 0.157535 | 0.269461233  | 0.01596 | 0.316688275  | 0.004565 |
| SECISBP2   | -0.123034443 | 0.198954 | -0.230025718 | 0.01599 | -0.053175567 | 0.575813 |
| ARAP3      | 0.128171674  | 0.516116 | 0.471522471  | 0.01617 | 0.103260277  | 0.599794 |
| RPS9       | -0.094753735 | 0.699751 | -0.591600816 | 0.01616 | -0.339296003 | 0.167284 |
| GNF        | 0.305935029  | 0.116259 | 0.46713085   | 0.01623 | 0.073120247  | 0.707333 |
| CDH9       | 1.325701108  | 0.147724 | 2.156466172  | 0.01627 | 0.861923804  | 0.350498 |
| SLC16A5    | 0.21454317   | 0.134122 | -0.349814388 | 0.01631 | 0.050073098  | 0.725742 |
| TRHDE      | -0.649042465 | 0.061016 | -0.824440396 | 0.01646 | -0.622035769 | 0.07103  |
| ACSL3      | 0.078507131  | 0.528348 | 0.29825745   | 0.01651 | 0.468465579  | 0.000164 |
| ELK4       | 0.062393125  | 0.658449 | 0.335868518  | 0.01664 | 0.062751934  | 0.6554   |
| SCFD2      | -0.343788348 | 0.083654 | -0.475272855 | 0.01664 | -0.241534722 | 0.221373 |
| VPS39      | 0.026141852  | 0.807676 | 0.255858557  | 0.01667 | 0.20636617   | 0.05301  |
| BBS9       | -0.21023796  | 0.362596 | -0.549462267 | 0.01671 | -0.407473565 | 0.076663 |
| C7         | -0.014986852 | 0.982649 | 1.647020228  | 0.01673 | -0.240668621 | 0.726895 |
| CBLC       | -0.220716941 | 0.239289 | -0.449125384 | 0.01679 | -0.485709799 | 0.009659 |
| CD58       | 0.082511604  | 0.638824 | 0.412450368  | 0.0169  | 0.108193507  | 0.535139 |
| C4B        | 0.197912662  | 0.672646 | 1.086464639  | 0.01693 | 0.199478121  | 0.665135 |
| NNMT       | 0.939060307  | 0.108021 | 1.392843746  | 0.01692 | 0.979293581  | 0.093397 |
| FBXL22     | -0.031437082 | 0.950368 | -1.275652219 | 0.01701 | -0.759874293 | 0.131544 |
| PLCL2      | 0.312795395  | 0.244293 | 0.633921944  | 0.01701 | 0.277343108  | 0.299071 |
| RNF6       | 0.168592924  | 0.185572 | 0.302133466  | 0.01704 | 0.446749812  | 0.000413 |
| PDE1A      | -0.08119201  | 0.780896 | -0.697718337 | 0.01708 | 0.454956996  | 0.118122 |
| SIK1       | -0.004784816 | 0.993866 | -1.48761993  | 0.01707 | -0.795670252 | 0.201884 |
| AZI1       | -0.075051853 | 0.703775 | -0.469724074 | 0.01712 | 0.042624767  | 0.827929 |
| C5orf15    | 0.155544213  | 0.212835 | 0.296569408  | 0.01717 | 0.062369296  | 0.616374 |
| MUTYH      | -0.142851436 | 0.265047 | -0.303441896 | 0.01725 | -0.202952141 | 0.110312 |
| SEMA7A     | 0.5913566    | 0.241238 | 1.198083262  | 0.01727 | -0.019945097 | 0.96857  |
| TMEM35     | 0.009316448  | 0.973402 | -0.682735189 | 0.01726 | -0.053339424 | 0.847544 |
| IGF2BP2    | 0.13879246   | 0.173361 | -0.243087384 | 0.01735 | 0.16101872   | 0.113547 |
| SLC25A10   | -0.439128896 | 0.051339 | -0.534347706 | 0.01738 | -0.885737852 | 9.05E-05 |
| IDNK       | -0.191596604 | 0.389706 | -0.516903624 | 0.01753 | -0.596108324 | 0.007384 |
| EIF2D      | -0.152784717 | 0.137605 | -0.243641291 | 0.01756 | -0.156543849 | 0.125208 |
| SUZ12P     | -0.157015357 | 0.158637 | -0.262305649 | 0.01757 | -0.038846395 | 0.721593 |

|            |              |          |              |         |              |          |
|------------|--------------|----------|--------------|---------|--------------|----------|
| TP63       | 0.996461782  | 0.10879  | 1.468818148  | 0.0176  | -0.296013942 | 0.643133 |
| ATP8A1     | -0.435799131 | 0.089817 | -0.608516646 | 0.01762 | -0.572382109 | 0.026146 |
| ADCY2      | 0.41880681   | 0.281208 | 0.907541881  | 0.01787 | 0.018312123  | 0.96241  |
| CKS1B      | -0.078507469 | 0.513597 | -0.283880785 | 0.01807 | 0.005646055  | 0.962284 |
| NDST4      | 1.857080567  | 0.226621 | 3.600921901  | 0.01807 | -2.548387904 | 0.160572 |
| SERPINB9   | -0.415353408 | 0.087898 | -0.575447993 | 0.01804 | -0.468400225 | 0.054078 |
| TC-499B15. | -0.685912394 | 0.192793 | -1.30356511  | 0.01808 | -1.055000044 | 0.047925 |
| P11-17M15. | 0.247555248  | 0.556162 | 0.936724166  | 0.01813 | 0.078163684  | 0.851765 |
| CCDC171    | 0.095182355  | 0.769546 | 0.76070347   | 0.01819 | 0.058903179  | 0.855902 |
| P11-83M16. | -0.250086119 | 0.468853 | 0.753212185  | 0.01819 | 0.461808558  | 0.152435 |
| FLVCR2     | 0.160272128  | 0.766674 | -1.30186809  | 0.01828 | -1.348861403 | 0.014738 |
| RPS23P8    | 0.037208943  | 0.882903 | -0.596172271 | 0.01837 | 0.005398762  | 0.982945 |
| TSPAN11    | 0.603973032  | 0.167182 | 1.027170105  | 0.01838 | -0.024103506 | 0.956177 |
| COPB2      | -0.040816531 | 0.604295 | 0.184814996  | 0.01846 | 0.084600991  | 0.281018 |
| HVCN1      | 0.206357731  | 0.699238 | 1.165719469  | 0.01853 | 1.10125982   | 0.027895 |
| ADCK1      | -0.037595788 | 0.851896 | -0.476523085 | 0.01859 | -0.40024248  | 0.049378 |
| CSF2       | 1.249173405  | 0.260393 | 2.506605984  | 0.01863 | 1.083673221  | 0.327441 |
| PHF20L1    | 0.060379151  | 0.631362 | 0.295380868  | 0.01868 | 0.281258397  | 0.024911 |
| ANO6       | 0.127252988  | 0.25917  | 0.264202906  | 0.01884 | 0.097830524  | 0.384843 |
| PURB       | 0.109666047  | 0.250702 | 0.222963177  | 0.01882 | 0.229970272  | 0.015293 |
| VTA1       | 0.088931559  | 0.389115 | 0.240440758  | 0.01881 | 0.124071601  | 0.226282 |
| AKNA       | -0.081846735 | 0.648568 | -0.422022827 | 0.01887 | -0.603903451 | 0.000795 |
| MAFB       | 1.058147602  | 0.173843 | 1.815193967  | 0.01897 | -0.339104787 | 0.667367 |
| DOC2A      | 0.056466111  | 0.880769 | -0.903276943 | 0.01925 | -0.326591085 | 0.385085 |
| FN1        | 0.659013628  | 0.13168  | 1.023135845  | 0.01926 | 0.171042644  | 0.695604 |
| AP1S3      | -0.226880389 | 0.178731 | -0.392354323 | 0.01937 | -0.277835191 | 0.097444 |
| CYP4B1     | 0.57998585   | 0.132892 | 0.866425668  | 0.01935 | 0.760051246  | 0.041599 |
| F11        | 0.981929041  | 0.104021 | 1.403218372  | 0.01937 | 1.459095078  | 0.014453 |
| FAM171B    | 0.161730393  | 0.697247 | 0.968420216  | 0.01937 | -0.016076092 | 0.969143 |
| OTUB2      | 0.156894896  | 0.432867 | 0.455387698  | 0.0194  | 0.029082859  | 0.883441 |
| DYNLT1     | 0.075777655  | 0.412104 | 0.213920126  | 0.01944 | 0.216000412  | 0.018037 |
| DFFB       | 0.257890087  | 0.190692 | 0.451860313  | 0.01947 | 0.062684355  | 0.746925 |
| PSAP       | -0.240850046 | 0.065077 | -0.304789076 | 0.01954 | -0.384624102 | 0.003213 |
| SH3D19     | -0.045464234 | 0.733983 | -0.311677898 | 0.01975 | -0.106424478 | 0.425399 |
| CAMKK1     | 0.360516907  | 0.088287 | 0.484629515  | 0.01979 | -0.056055432 | 0.793813 |
| KPNA1      | 0.130705384  | 0.20211  | 0.237925701  | 0.01979 | 0.314699293  | 0.002006 |
| C12orf29   | 0.157262215  | 0.203534 | 0.285145115  | 0.01982 | 0.351836489  | 0.003868 |
| STAT5B     | -0.22768219  | 0.067792 | -0.289569532 | 0.01986 | -0.150756894 | 0.2232   |
| TET1       | 0.235839958  | 0.071466 | -0.305890728 | 0.0199  | 0.047110451  | 0.718662 |
| FADS2      | 0.017815     | 0.882991 | -0.281506004 | 0.02006 | 0.028233265  | 0.815521 |
| FKBP1A     | 0.064340859  | 0.638955 | 0.317469799  | 0.02002 | 0.096491002  | 0.481137 |
| UBASH3B    | 0.678893521  | 0.090429 | 0.930059134  | 0.02    | 0.319016321  | 0.426579 |
| SLC9A3R2   | -0.074792454 | 0.677929 | -0.42110913  | 0.02012 | -0.503933887 | 0.005537 |
| LBH        | -0.006845487 | 0.979751 | -0.628349264 | 0.02019 | -0.200536798 | 0.456906 |
| TA-313A17. | -0.054574775 | 0.91189  | -1.243713934 | 0.0203  | -0.480071935 | 0.336272 |
| DDX3X      | 0.341456495  | 0.086753 | 0.461529605  | 0.0203  | 0.859913139  | 1.48E-05 |
| HADH       | -0.477394917 | 0.125391 | -0.724046147 | 0.02031 | -0.649213066 | 0.037374 |

|           |              |          |              |         |              |          |
|-----------|--------------|----------|--------------|---------|--------------|----------|
| EGFLAM    | 0.421344528  | 0.442802 | 1.269283434  | 0.02038 | -0.048233698 | 0.93005  |
| NKX3-2    | 0.137991239  | 0.7624   | -1.066581937 | 0.02049 | 0.150182674  | 0.741792 |
| CCDC159   | -0.257580997 | 0.148747 | -0.411563196 | 0.02054 | -0.327965291 | 0.062447 |
| IL17RE    | -0.418885935 | 0.083338 | -0.558518087 | 0.02054 | -0.454648151 | 0.059273 |
| TOM1L2    | 0.310105674  | 0.066151 | 0.392582985  | 0.02053 | 0.225142644  | 0.184629 |
| BSG       | -0.155682421 | 0.194633 | -0.277859035 | 0.0206  | -0.352604645 | 0.003309 |
| FABP3     | 0.57480959   | 0.053746 | 0.686734841  | 0.02062 | 0.388274549  | 0.192317 |
| NMNAT1    | 0.164457271  | 0.30331  | 0.364997932  | 0.02062 | -0.03583806  | 0.821959 |
| CPT1B     | 0.231125034  | 0.269692 | 0.482969097  | 0.02073 | 0.339718407  | 0.103243 |
| RAD17P1   | -0.472768809 | 0.12115  | -0.707270567 | 0.02081 | -0.423306563 | 0.159045 |
| SAA2      | 0.248420328  | 0.631469 | 1.13867424   | 0.02083 | 0.486617735  | 0.33329  |
| ABHD17C   | -0.260964736 | 0.1316   | -0.399211014 | 0.02102 | -0.461052485 | 0.007678 |
| RPSAP57   | 0.060596643  | 0.902447 | -1.26623737  | 0.02101 | 0.033060866  | 0.945993 |
| RHOA      | 0.442789134  | 0.122868 | 0.660682651  | 0.02124 | 0.388629651  | 0.175549 |
| HMGA1P1   | 0.254143338  | 0.408462 | -0.732829114 | 0.02142 | -0.094816087 | 0.758706 |
| MAP2      | 0.636299434  | 0.253243 | 1.276864335  | 0.02146 | 0.531730465  | 0.340167 |
| KRT19     | -0.133419591 | 0.30676  | -0.300104567 | 0.0215  | -0.352495036 | 0.006929 |
| SKP1      | -0.103350291 | 0.168564 | 0.171431862  | 0.02161 | 0.099564269  | 0.182204 |
| DHRS1     | -0.126995159 | 0.377739 | -0.331141272 | 0.02176 | -0.082297933 | 0.563929 |
| DHX29     | -0.280940451 | 0.069098 | -0.353884325 | 0.02177 | -0.220941734 | 0.151128 |
| MUC15     | -0.500726212 | 0.239404 | -0.991305641 | 0.02177 | -1.452492694 | 0.001006 |
| C12orf73  | -0.253094836 | 0.090008 | -0.338514575 | 0.02185 | -0.124659762 | 0.394294 |
| PHACTR4   | 0.154518881  | 0.194146 | -0.273588713 | 0.02185 | 0.066691204  | 0.574329 |
| PRKD3     | 0.164132035  | 0.237695 | 0.317519432  | 0.02201 | 0.226585646  | 0.102197 |
| UNKL      | 0.479096065  | 0.155538 | 0.773406897  | 0.02205 | 0.161915725  | 0.631608 |
| ATXN7L3   | 0.148537334  | 0.161914 | 0.2420858    | 0.0222  | 0.101818617  | 0.335974 |
| RHOB      | 0.031951335  | 0.887448 | 0.514538493  | 0.02222 | -0.150892803 | 0.503734 |
| FAM71E1   | -0.152729731 | 0.708697 | -0.960629114 | 0.02225 | -0.508326917 | 0.2232   |
| HOXD8     | -0.541515906 | 0.214783 | -1.003477373 | 0.0223  | -1.015813033 | 0.020401 |
| PCDH19    | 0.721928148  | 0.174584 | 1.209978065  | 0.02233 | -1.315782052 | 0.015842 |
| GPT2      | -0.241430946 | 0.158077 | -0.389842739 | 0.02236 | -0.619403342 | 0.000293 |
| SPRED1    | 0.041189075  | 0.768397 | 0.318661109  | 0.02239 | -0.132358022 | 0.343534 |
| FAM102B   | -0.007848735 | 0.947683 | 0.27121763   | 0.02241 | 0.11402817   | 0.33782  |
| TPST1     | 0.193769515  | 0.238937 | 0.373595257  | 0.0225  | 0.022361789  | 0.891817 |
| NELFE     | 0.149916616  | 0.079622 | 0.193226751  | 0.02257 | 0.161817994  | 0.055859 |
| ACAD9     | -0.177517662 | 0.112899 | -0.252958939 | 0.02264 | -0.167238    | 0.131286 |
| RPS28     | -0.172630266 | 0.197324 | -0.304898896 | 0.02273 | -0.190810494 | 0.153415 |
| SLC2A4    | -0.678355219 | 0.063028 | -0.830779431 | 0.02277 | -0.858048961 | 0.018659 |
| COX20     | -0.014072435 | 0.884119 | 0.218264774  | 0.02285 | 0.060013245  | 0.530908 |
| SIX1      | 1.546494165  | 0.145967 | 2.418255504  | 0.02283 | -0.567081015 | 0.596166 |
| NAP1L6    | 0.758510648  | 0.094149 | 0.998863842  | 0.0229  | 0.942752794  | 0.031645 |
| TNNT1     | -0.171062086 | 0.561663 | -0.67289028  | 0.0229  | -0.123837615 | 0.673469 |
| PABPC1P11 | -0.267594608 | 0.546601 | -1.094364822 | 0.02302 | 0.149500284  | 0.721051 |
| UNC13A    | 1.080171048  | 0.097944 | 1.469908154  | 0.02316 | 0.796829424  | 0.223254 |
| CACNA1D   | 0.093497551  | 0.755433 | 0.672971343  | 0.02318 | -0.262491535 | 0.383007 |
| USMG5     | 0.050518914  | 0.612895 | 0.22518787   | 0.0232  | 0.245623829  | 0.013195 |
| RHBDD1    | -0.270466976 | 0.058082 | -0.321789133 | 0.02327 | -0.252287413 | 0.076045 |

|            |              |          |              |         |              |          |
|------------|--------------|----------|--------------|---------|--------------|----------|
| MOCS1      | 0.322213444  | 0.153945 | 0.493816334  | 0.02337 | -0.006404734 | 0.977181 |
| RASSF5     | 0.791841266  | 0.057793 | 0.943794456  | 0.02337 | 1.471954012  | 0.000378 |
| ATP1B1     | 0.289163501  | 0.087585 | 0.383399171  | 0.02347 | 0.177578044  | 0.294074 |
| SLC11A2    | 0.335662725  | 0.077646 | 0.430496614  | 0.02353 | 0.26502691   | 0.163429 |
| LIFR       | 0.087099687  | 0.757034 | 0.636625767  | 0.02367 | -0.257880568 | 0.359744 |
| KLHL25     | 0.220676691  | 0.201126 | 0.385801905  | 0.02374 | 0.008833738  | 0.959138 |
| ANKFY1     | 0.234920417  | 0.054667 | 0.275491846  | 0.02376 | 0.182763952  | 0.133406 |
| CDH26      | -0.546499071 | 0.0991   | -0.749029899 | 0.02386 | -0.569858954 | 0.08499  |
| AK8        | 0.817987416  | 0.081779 | 1.042737639  | 0.02397 | 0.323819499  | 0.498113 |
| ACSS3      | 0.288418451  | 0.488884 | 0.935954335  | 0.02404 | 0.053801416  | 0.897466 |
| HEXDC      | -0.116289771 | 0.495044 | -0.385720507 | 0.0242  | -0.043726746 | 0.794925 |
| LAMB4      | -0.984495282 | 0.066453 | -1.215936314 | 0.02416 | -0.260414914 | 0.608568 |
| PPP2R4     | 0.103447301  | 0.325222 | -0.236867459 | 0.02419 | -0.153467744 | 0.143906 |
| RAD54B     | -0.405410189 | 0.082309 | -0.522232192 | 0.02425 | -0.043295049 | 0.850709 |
| LAMA3      | 0.415687887  | 0.06889  | 0.514655581  | 0.02427 | 0.103363887  | 0.651023 |
| APOBEC3C   | -0.313445187 | 0.096822 | -0.425134612 | 0.0243  | -0.465073724 | 0.013673 |
| CLDN11     | 0.212504884  | 0.743911 | 1.461265636  | 0.02432 | -0.769033171 | 0.23877  |
| CDYL       | -0.191636225 | 0.1518   | -0.300443721 | 0.02442 | -0.125759023 | 0.344509 |
| RNF169     | 0.102570095  | 0.131188 | 0.151180891  | 0.02452 | 0.263906957  | 7.57E-05 |
| P11-176H8. | 0.41470558   | 0.139648 | 0.616444524  | 0.02449 | -0.168584573 | 0.545351 |
| GAPDHS     | 0.334682931  | 0.346243 | 0.771561015  | 0.02463 | 0.751062901  | 0.026105 |
| TMEM164    | -0.044234167 | 0.696171 | -0.253781795 | 0.02462 | -0.21507974  | 0.056121 |
| SH3GL2     | 0.118657663  | 0.825266 | -1.286923297 | 0.02466 | -0.194714253 | 0.713938 |
| SLC43A2    | -0.033863696 | 0.902429 | -0.621544463 | 0.02471 | -0.518625074 | 0.060801 |
| CCDC129    | 0.705448749  | 0.414948 | 1.915246592  | 0.02481 | 1.221232065  | 0.160126 |
| C6orf106   | 0.137161642  | 0.151657 | 0.213565315  | 0.02483 | 0.216810896  | 0.02272  |
| PNKD       | -0.009002484 | 0.932262 | -0.237843452 | 0.0249  | -0.163044022 | 0.123791 |
| LHFPL2     | 0.202614202  | 0.378951 | 0.514761787  | 0.025   | -0.085656632 | 0.709974 |
| C6orf136   | -0.319182857 | 0.116177 | -0.458016248 | 0.02505 | -0.565484208 | 0.005719 |
| HSF2BP     | -0.41542287  | 0.262669 | -0.853906933 | 0.02503 | -0.541185687 | 0.140537 |
| MTMR6      | 0.035180741  | 0.730396 | 0.226761452  | 0.02506 | 0.285589844  | 0.004728 |
| NOX4       | 0.563336362  | 0.175888 | 0.923794533  | 0.02503 | 0.361798312  | 0.38335  |
| RHOA       | -0.097041904 | 0.085538 | 0.125731198  | 0.02508 | 0.142376527  | 0.011139 |
| 6-Sep      | 0.342011042  | 0.128226 | 0.50218429   | 0.02524 | 0.143761652  | 0.522768 |
| P11-254B13 | 0.658094269  | 0.129542 | 0.947038742  | 0.02528 | 1.007460908  | 0.016722 |
| ENPP6      | 0.878640452  | 0.09538  | 1.162381625  | 0.02552 | 0.782376197  | 0.132916 |
| IRF8       | -0.710514625 | 0.07071  | -0.873788394 | 0.02557 | -1.080147913 | 0.005899 |
| METTL24    | -0.055918248 | 0.86898  | -0.7861321   | 0.02561 | -0.227581665 | 0.500384 |
| METTL25    | -0.246336609 | 0.192671 | -0.415769641 | 0.0256  | -0.158452452 | 0.393698 |
| AFAP1L2    | 0.215024852  | 0.513126 | -0.738773798 | 0.02565 | -0.017738452 | 0.956992 |
| ATMIN      | 0.175499504  | 0.051154 | 0.200101888  | 0.02567 | 0.361643014  | 5.18E-05 |
| EEF1A1P32  | 0.135590126  | 0.763299 | 0.922822888  | 0.02568 | 0.717005152  | 0.086119 |
| MRV11      | 0.308473416  | 0.327633 | -0.707423151 | 0.02581 | 0.163541078  | 0.603673 |
| SNCG       | -0.349930493 | 0.305437 | -0.768847447 | 0.0258  | -0.128726099 | 0.701807 |
| NMI        | -0.196816609 | 0.391188 | 0.490625273  | 0.02587 | -0.006325605 | 0.977524 |
| ERN2       | -0.002297767 | 0.993955 | -0.677601517 | 0.02599 | -0.339199761 | 0.264239 |
| ITPR1      | 0.023135173  | 0.917862 | 0.497337716  | 0.02603 | -0.037007022 | 0.868807 |

|             |              |          |              |         |              |          |
|-------------|--------------|----------|--------------|---------|--------------|----------|
| AMT         | -0.288583493 | 0.138218 | -0.427341518 | 0.02611 | -0.484762199 | 0.01206  |
| ETNK1       | -0.223088284 | 0.135599 | -0.332331045 | 0.02613 | -0.193417812 | 0.195266 |
| LAMP5       | 0.069645037  | 0.9396   | 2.025118416  | 0.02617 | -1.965114331 | 0.037778 |
| KPNA5       | -0.172839091 | 0.237728 | -0.323420612 | 0.0263  | -0.03125413  | 0.828884 |
| TIMM17B     | -0.189901856 | 0.072289 | -0.233032907 | 0.02637 | -0.156307908 | 0.133858 |
| COL25A1     | 0.627181929  | 0.483185 | 1.983142705  | 0.02649 | 0.456521256  | 0.609878 |
| HAPLN4      | 0.647493204  | 0.145627 | -1.042913543 | 0.02649 | 0.206321636  | 0.644443 |
| PEX11G      | -0.604893545 | 0.104199 | -0.846720112 | 0.02649 | -0.29927529  | 0.397234 |
| ZNF581      | -0.115482416 | 0.522969 | -0.401630365 | 0.02648 | -0.377242468 | 0.036771 |
| RPP40       | -0.217722799 | 0.73582  | -1.451717739 | 0.02654 | -0.569012567 | 0.377343 |
| UBA3        | 0.024397774  | 0.792604 | 0.203706413  | 0.02667 | 0.337503455  | 0.00023  |
| ERI3        | -0.181462604 | 0.123194 | -0.259530195 | 0.02674 | -0.1131082   | 0.330765 |
| PLCB4       | 0.16897149   | 0.46468  | 0.509266022  | 0.0269  | 0.486802646  | 0.034357 |
| PAG1        | -0.119725156 | 0.474373 | -0.36972311  | 0.02709 | -0.447048965 | 0.007552 |
| AKAP1       | -0.074845333 | 0.726451 | -0.472274287 | 0.02716 | -0.284310552 | 0.183468 |
| DPY19L2     | -0.1819849   | 0.410043 | -0.48738468  | 0.02716 | -0.13613999  | 0.531797 |
| PRKCSH      | -0.083797623 | 0.455579 | -0.248072538 | 0.02716 | -0.321151994 | 0.004245 |
| DIS3        | 0.072748952  | 0.449829 | 0.211744086  | 0.02718 | 0.35707068   | 0.000189 |
| GBP4        | 0.450703669  | 0.129439 | 0.64946463   | 0.02722 | 0.004511005  | 0.987969 |
| KCNMB2      | -0.918047121 | 0.102506 | -1.247726673 | 0.02734 | -1.166199262 | 0.038898 |
| RBM25       | 0.086580067  | 0.339357 | -0.199936815 | 0.0274  | 0.024820079  | 0.783672 |
| RP11-767L7. | -0.591908471 | 0.136792 | -0.889289756 | 0.0275  | -1.007277065 | 0.013036 |
| DPF3        | -0.162310547 | 0.781808 | 1.237950045  | 0.02771 | -0.682388848 | 0.243559 |
| CDKN2D      | 0.1893955    | 0.510368 | 0.614209408  | 0.02774 | 0.173397987  | 0.54167  |
| EFCAB4A     | -0.277568498 | 0.201597 | -0.476081168 | 0.02779 | -0.176451887 | 0.413504 |
| LRIG1       | 0.031895811  | 0.8835   | -0.479221336 | 0.02778 | -0.308059556 | 0.15681  |
| SPATA2L     | 0.37517636   | 0.064013 | 0.436692264  | 0.02785 | 0.217934875  | 0.280082 |
| C11orf87    | 2.476458598  | 0.126619 | 3.543182085  | 0.028   | -0.92295998  | 0.594593 |
| HIF3A       | -0.115119083 | 0.718298 | -0.704520077 | 0.02806 | -0.55761901  | 0.082262 |
| TRIM39      | 0.144644383  | 0.182086 | 0.234697     | 0.02811 | 0.300367165  | 0.004733 |
| RAC3        | -0.149117646 | 0.458776 | -0.444801891 | 0.02822 | -0.210621628 | 0.292903 |
| THSD1       | 0.337712612  | 0.436813 | 0.911729375  | 0.02842 | 0.153504517  | 0.723975 |
| CITED2      | -0.084008173 | 0.671919 | -0.434998079 | 0.02852 | -0.209776322 | 0.289622 |
| CD63        | 0.042771283  | 0.677317 | 0.224829888  | 0.02855 | -0.036143527 | 0.724973 |
| C1orf95     | 1.753017769  | 0.13072  | 2.52695392   | 0.02864 | 0.863637683  | 0.466457 |
| ZNF177      | -0.211896562 | 0.469536 | -0.633240493 | 0.02864 | 0.030656034  | 0.91335  |
| HIF1AN      | 0.128101136  | 0.322074 | 0.282321327  | 0.02874 | 0.289872525  | 0.024626 |
| SYDE2       | 0.029865147  | 0.847354 | -0.340619746 | 0.02883 | 0.109899879  | 0.476371 |
| WDR55       | 0.047929491  | 0.455317 | 0.13773963   | 0.02889 | 0.045977052  | 0.466696 |
| .RRC37A11f  | -0.52867181  | 0.198014 | -0.90995225  | 0.02896 | -0.045690002 | 0.907948 |
| AK5         | -0.487795548 | 0.302021 | -1.049526058 | 0.02903 | -1.112746547 | 0.019828 |
| LAMC1       | 0.068221308  | 0.624506 | 0.30416286   | 0.02903 | 0.14630416   | 0.293677 |
| TMEM133     | -0.139113471 | 0.356413 | -0.329248353 | 0.02915 | 0.166587028  | 0.258072 |
| CNTN6       | 0.730183504  | 0.374341 | 1.764908907  | 0.02921 | -0.111677858 | 0.892723 |
| NRG3        | 0.500332356  | 0.372334 | 1.215995206  | 0.02929 | 0.73595122   | 0.188103 |
| ST3GAL4     | 0.260319968  | 0.229223 | 0.46535195   | 0.02928 | 0.202174675  | 0.344351 |
| DUSP12      | -0.228495113 | 0.058923 | -0.260638768 | 0.02933 | -0.087967686 | 0.458971 |



|            |              |          |              |         |              |          |
|------------|--------------|----------|--------------|---------|--------------|----------|
| PSMC2      | -0.012731097 | 0.882508 | 0.186219574  | 0.02933 | 0.232100694  | 0.006513 |
| ACTR3      | 0.11212165   | 0.201488 | 0.190933379  | 0.02936 | 0.202274403  | 0.020901 |
| EBF2       | 0.70988426   | 0.475617 | 2.162679856  | 0.02938 | -0.707439634 | 0.479234 |
| TUBB8P1    | -0.032381639 | 0.941031 | -1.085318689 | 0.0294  | 0.038401275  | 0.927678 |
| DNAH8      | 1.390071798  | 0.102493 | 1.841485196  | 0.02952 | -1.229035577 | 0.17495  |
| C1orf210   | -0.316040749 | 0.134446 | -0.458675269 | 0.0296  | -0.479230406 | 0.022874 |
| PER1       | -0.194339203 | 0.539275 | -0.691953796 | 0.02957 | -0.687877202 | 0.030177 |
| RBL1       | -0.353420713 | 0.100414 | -0.466930629 | 0.0296  | 0.039055165  | 0.855119 |
| MTMR11     | 0.402861963  | 0.088688 | 0.513271426  | 0.02971 | 0.411683753  | 0.081381 |
| SCRN2      | -0.313294288 | 0.065475 | -0.367358375 | 0.02975 | -0.410516577 | 0.0149   |
| ORMDL2     | 0.273651032  | 0.059031 | 0.313341809  | 0.02977 | 0.241353437  | 0.094396 |
| PLAGL2     | 0.142621083  | 0.382684 | -0.357338368 | 0.02986 | -0.290151658 | 0.076959 |
| TMEM98     | -0.190171344 | 0.243468 | -0.35398407  | 0.02988 | -0.312306403 | 0.05493  |
| CRLF1      | 0.450788218  | 0.391196 | 1.129327754  | 0.02991 | 0.023403056  | 0.964711 |
| PAQR4      | -0.425558175 | 0.072365 | -0.511950244 | 0.03001 | -0.580277895 | 0.013794 |
| C17orf53   | -0.240286415 | 0.298801 | -0.494325458 | 0.03005 | -0.444538073 | 0.051602 |
| P11-434D12 | -0.068133932 | 0.949447 | -2.485957152 | 0.03013 | -0.039268048 | 0.970774 |
| ABHD14A    | -0.372518719 | 0.056265 | -0.419870399 | 0.03018 | -0.573411571 | 0.003309 |
| ABCC13     | 0.463942754  | 0.453574 | 1.301940185  | 0.03023 | 0.211585875  | 0.736457 |
| AES        | 0.165292111  | 0.057773 | -0.189132197 | 0.03024 | -0.035837685 | 0.680484 |
| GOLT1A     | -0.157539034 | 0.530459 | -0.547005872 | 0.03021 | -0.329382141 | 0.189189 |
| ANKS1A     | 0.122227415  | 0.25889  | -0.235761636 | 0.03028 | -0.087659918 | 0.41755  |
| P11-305M3  | 0.251392136  | 0.223953 | 0.440935515  | 0.03029 | 0.498022459  | 0.014024 |
| CEBPB      | 0.471916767  | 0.054985 | 0.529161287  | 0.03052 | 0.161736898  | 0.511477 |
| KHK        | -0.159840136 | 0.703512 | -0.918451902 | 0.03064 | -1.210627947 | 0.006259 |
| TLE2       | 0.05968657   | 0.711953 | -0.351186382 | 0.03062 | -0.001532112 | 0.992429 |
| RNPUL2-BSI | 0.219823813  | 0.199961 | -0.37236586  | 0.03081 | -0.683072045 | 7.99E-05 |
| MLC1       | 0.696260492  | 0.407679 | -1.85956057  | 0.03084 | -0.55825709  | 0.507218 |
| NPIP15     | 0.062065379  | 0.750513 | 0.409789517  | 0.03079 | 0.411808702  | 0.02954  |
| RSPH1      | 0.563559188  | 0.05856  | 0.641617457  | 0.03076 | 0.415968979  | 0.162892 |
| S100A2     | 0.754925473  | 0.398648 | 1.912944252  | 0.03083 | -0.51545209  | 0.570468 |
| TBC1D19    | -0.208213286 | 0.197736 | -0.348313861 | 0.03073 | -0.277635889 | 0.083251 |
| TCTN2      | -0.214889804 | 0.100682 | -0.280687192 | 0.03082 | -0.259163447 | 0.045633 |
| REEP6      | -0.100697903 | 0.669411 | -0.510303524 | 0.03095 | -0.672698408 | 0.004524 |
| MYBPC2     | 0.884456052  | 0.137275 | 1.2538007    | 0.03108 | 1.650505692  | 0.004772 |
| TAF13      | 0.090303642  | 0.54073  | 0.313937478  | 0.03109 | 0.13117681   | 0.369732 |
| AK9        | -0.273798068 | 0.139024 | -0.395952255 | 0.0311  | -0.026215955 | 0.885767 |
| CORO2B     | 0.932707106  | 0.135898 | 1.333275364  | 0.03116 | 0.427734199  | 0.497295 |
| SCG3       | -0.247561532 | 0.459929 | -0.753249601 | 0.03114 | -0.076981249 | 0.810575 |
| SERINC2    | 0.003723353  | 0.978304 | -0.295235764 | 0.03125 | -0.573948847 | 2.98E-05 |
| ACSF3      | -0.002060437 | 0.988237 | -0.300932237 | 0.03139 | -0.174394465 | 0.213196 |
| ATP10D     | 0.188950931  | 0.290562 | 0.382101732  | 0.0314  | 0.390528383  | 0.028147 |
| BAAT       | 1.163402109  | 0.193837 | 1.919324659  | 0.03134 | 1.59245909   | 0.074311 |
| GRIP1      | 0.315689743  | 0.391527 | 0.789371167  | 0.0313  | 0.475920935  | 0.196477 |
| PROCA1     | -0.291390551 | 0.283308 | -0.596779202 | 0.03135 | -0.237870408 | 0.376456 |
| YWHAZ      | 0.114680942  | 0.144772 | 0.169171157  | 0.03135 | 0.161815841  | 0.039473 |
| CHAF1A     | -0.23880695  | 0.197155 | -0.396848893 | 0.03156 | -0.333494095 | 0.070268 |

|              |              |          |              |         |              |          |
|--------------|--------------|----------|--------------|---------|--------------|----------|
| CUL2         | -0.044901864 | 0.578997 | 0.171555706  | 0.03151 | 0.120112165  | 0.131934 |
| TRIP12       | 0.002855239  | 0.974895 | 0.194769801  | 0.03153 | 0.307614745  | 0.000679 |
| 3IF2-C20orf1 | 0.012857001  | 0.967294 | 0.663546883  | 0.0316  | 0.541883798  | 0.079501 |
| APOC1        | -0.091196523 | 0.682831 | -0.480694827 | 0.03171 | 0.205828813  | 0.351987 |
| RPL18        | -0.198954209 | 0.083788 | -0.246276576 | 0.03225 | -0.276263907 | 0.0163   |
| B3GNTL1      | -0.167498279 | 0.646739 | -0.783386438 | 0.03233 | -0.653251965 | 0.073662 |
| EHMT2        | -0.151728827 | 0.294836 | -0.309913094 | 0.03234 | -0.163291874 | 0.258809 |
| LAMA4        | 0.269915914  | 0.347392 | 0.61396806   | 0.03239 | -0.139717874 | 0.626711 |
| RCN3         | 0.216225081  | 0.514676 | 0.704833331  | 0.03241 | -0.489293756 | 0.141789 |
| TP53I13      | -0.165893889 | 0.343566 | -0.374736839 | 0.03239 | -0.471715121 | 0.007249 |
| TBX2         | 0.524998609  | 0.1863   | 0.847043485  | 0.03247 | 0.137507273  | 0.729149 |
| FBXO34       | 0.098978154  | 0.398613 | 0.249385606  | 0.03258 | 0.243660554  | 0.036616 |
| RBPMS2       | -0.082873273 | 0.86342  | -1.114508352 | 0.0327  | -0.079873293 | 0.866778 |
| PDE7B        | 0.912788926  | 0.172634 | 1.427890984  | 0.03289 | 0.761706818  | 0.25655  |
| ADRA2A       | -0.692899247 | 0.062465 | -0.791197583 | 0.03299 | -0.833896172 | 0.024587 |
| SLC7A2       | 0.139797649  | 0.483882 | 0.4251867    | 0.03299 | 0.104472295  | 0.600578 |
| COL1A2       | 0.242453067  | 0.486676 | 0.742942731  | 0.03303 | 0.043298884  | 0.901135 |
| CTSO         | -0.328412758 | 0.065582 | -0.378391522 | 0.03314 | -0.12246345  | 0.486852 |
| TNKS         | -0.079556676 | 0.533044 | -0.272068253 | 0.03313 | -0.174535437 | 0.171281 |
| DPH1         | -0.180378204 | 0.260547 | -0.341409492 | 0.03315 | -0.280855434 | 0.078798 |
| CSDE1        | -0.018582677 | 0.779341 | 0.141056569  | 0.03322 | 0.153103575  | 0.020775 |
| ZNF225       | 0.13418416   | 0.380716 | 0.320962303  | 0.03325 | 0.265564335  | 0.078334 |
| NBR2         | 0.502783318  | 0.349534 | 1.13795781   | 0.03334 | 0.406655536  | 0.448845 |
| C12orf5      | 0.171578764  | 0.424629 | 0.454853844  | 0.03341 | 0.398523597  | 0.061504 |
| CNN3         | 0.186668778  | 0.218043 | 0.322058355  | 0.03348 | 0.369236607  | 0.014764 |
| CCL22        | 0.344271352  | 0.355528 | 0.766706009  | 0.03355 | 0.144122484  | 0.69827  |
| KCNN4        | -0.445795734 | 0.311154 | -0.945834239 | 0.03356 | -1.715309163 | 0.000198 |
| NR1H3        | -0.061328741 | 0.73262  | -0.38039841  | 0.03371 | -0.22417715  | 0.210413 |
| PRKCG        | 1.216736844  | 0.100721 | 1.57653253   | 0.03376 | 1.37520914   | 0.064092 |
| UBP1         | 0.001685926  | 0.988901 | -0.257090363 | 0.03374 | -0.08510755  | 0.481271 |
| OSBPL2       | 0.216466171  | 0.070705 | 0.252850156  | 0.03394 | 0.234038525  | 0.049402 |
| BTD          | -0.272111058 | 0.165863 | -0.414453048 | 0.03404 | -0.288477001 | 0.138413 |
| MANSC1       | -0.397402372 | 0.059088 | -0.445778663 | 0.03405 | -0.378995185 | 0.07113  |
| SH3BP5       | 0.330292434  | 0.187688 | 0.528716813  | 0.03402 | -0.092211054 | 0.713537 |
| SH3GLB2      | -0.044032997 | 0.722265 | -0.262240767 | 0.0341  | 0.022928912  | 0.852559 |
| PPP2R3A      | 0.039421102  | 0.779552 | -0.298546143 | 0.03413 | 0.030141721  | 0.82976  |
| AAAS         | -0.037401959 | 0.741176 | -0.240156475 | 0.03417 | -0.006648168 | 0.952826 |
| GPR180       | 0.063486721  | 0.486616 | 0.191445025  | 0.03417 | 0.158008066  | 0.080282 |
| TKT          | -0.219803961 | 0.146112 | -0.320195896 | 0.03419 | -0.355575673 | 0.018677 |
| KRT18P31     | -0.590530242 | 0.099319 | -0.758200525 | 0.03427 | -0.260753607 | 0.44802  |
| IFIH1        | -0.088677413 | 0.633927 | 0.386551158  | 0.03443 | -0.049338257 | 0.78925  |
| RP11-345J4.1 | -0.126192157 | 0.7002   | -0.697049694 | 0.0345  | -0.642747032 | 0.050817 |
| GADD45A      | -0.339409885 | 0.284724 | -0.674019474 | 0.03455 | -0.538159862 | 0.089646 |
| PRKCZ        | -0.227732332 | 0.184577 | -0.361054044 | 0.03455 | -0.171519515 | 0.313957 |
| IWS1         | -0.110961757 | 0.185876 | -0.17632069  | 0.03462 | 0.075625431  | 0.361923 |
| TOP2B        | 0.013540205  | 0.894056 | 0.214429382  | 0.03467 | 0.250349117  | 0.013614 |
| NPR1         | -0.194345966 | 0.757456 | 1.281897765  | 0.03469 | 0.764521152  | 0.212244 |

|           |              |          |              |         |              |          |
|-----------|--------------|----------|--------------|---------|--------------|----------|
| SARS2     | -0.11068865  | 0.546871 | -0.388451769 | 0.03477 | -0.100949992 | 0.580354 |
| TUBB3     | 0.445108163  | 0.096506 | 0.563862384  | 0.03499 | 0.526018059  | 0.049241 |
| CYTL1     | -0.35503859  | 0.311127 | -0.741329418 | 0.03504 | 0.16910062   | 0.626498 |
| SCG5      | 0.4642634    | 0.411852 | 1.161568085  | 0.03504 | 0.290270771  | 0.608031 |
| SV2B      | 0.536126565  | 0.364688 | 1.238953603  | 0.03508 | 0.817638615  | 0.164323 |
| ADAMTSL4  | -0.099379699 | 0.701649 | -0.550711995 | 0.03523 | -0.265820944 | 0.305384 |
| C2orf76   | 0.129249356  | 0.545486 | 0.431756199  | 0.03523 | 0.332403913  | 0.10667  |
| VPS16     | 0.202300831  | 0.103946 | 0.258918644  | 0.03524 | 0.276828639  | 0.024224 |
| C20orf196 | -0.183538619 | 0.458468 | -0.523327936 | 0.03527 | 0.284039736  | 0.223438 |
| FAM192A   | -0.131180999 | 0.126296 | -0.179357929 | 0.03538 | -0.016750696 | 0.843308 |
| CTNNBIP1  | -0.180043787 | 0.16215  | -0.268644766 | 0.03555 | -0.3194807   | 0.012501 |
| TMEM194B  | -0.4535474   | 0.09467  | -0.567613526 | 0.03552 | -0.426817678 | 0.113752 |
| WDR7      | 0.211175398  | 0.351737 | 0.475261011  | 0.03553 | 0.502613146  | 0.026306 |
| APBA1     | 0.769679015  | 0.370944 | 1.762699253  | 0.03559 | -0.3419747   | 0.706188 |
| FOXP4     | 0.225764593  | 0.233945 | -0.401648068 | 0.03561 | -0.491787879 | 0.010003 |
| SFRP2     | -0.12310055  | 0.890657 | 1.860585821  | 0.03567 | -2.201932223 | 0.017523 |
| TP53I11   | 0.112765266  | 0.427395 | -0.299556316 | 0.03567 | -0.295127236 | 0.038401 |
| ANXA7     | 0.078294716  | 0.480375 | 0.231284696  | 0.03585 | 0.097630696  | 0.375635 |
| BEGAIN    | 1.077204937  | 0.085714 | 1.313278628  | 0.03585 | 0.430230771  | 0.497299 |
| COL11A1   | 0.333636327  | 0.497399 | 1.031453803  | 0.03579 | -0.22993703  | 0.640162 |
| EPM2AIP1  | 0.108926494  | 0.20831  | -0.182269614 | 0.0358  | 0.131138832  | 0.127369 |
| NCK1      | 0.266407698  | 0.091113 | 0.328907007  | 0.03587 | 0.482909592  | 0.002044 |
| TAAR3     | 0.882488578  | 0.202172 | 1.404409971  | 0.03581 | 0.885103511  | 0.195112 |
| TANGO2    | 0.222832629  | 0.099268 | 0.278569595  | 0.03582 | -0.074701765 | 0.579577 |
| GLTSCR2   | -0.064854271 | 0.680133 | -0.330050847 | 0.03597 | -0.272193627 | 0.08382  |
| PCDHB9    | 0.399507481  | 0.2372   | 0.696844245  | 0.03603 | 0.214549977  | 0.524712 |
| RLTPR     | 0.906656655  | 0.064064 | 1.006332112  | 0.036   | 0.284792425  | 0.556171 |
| AGTR2     | 0.181350784  | 0.849255 | 1.960292352  | 0.03624 | -0.904471673 | 0.352636 |
| ACTG2     | 0.532257222  | 0.086619 | -0.651335366 | 0.03636 | 0.412030973  | 0.184617 |
| DIP2B     | 0.155729014  | 0.12354  | 0.211004175  | 0.03642 | 0.188822576  | 0.061099 |
| EIF3L     | -0.16924549  | 0.083676 | -0.204606473 | 0.03644 | -0.049467066 | 0.612812 |
| CACNA2D1  | 0.295193865  | 0.347426 | 0.654891609  | 0.03653 | 0.010083467  | 0.974409 |
| ARSJ      | 0.375378884  | 0.282887 | 0.728322832  | 0.03662 | 0.099427533  | 0.776208 |
| NOD1      | 0.086009709  | 0.811692 | 0.741808392  | 0.03665 | -0.301186746 | 0.406417 |
| DYRK1A    | 0.099771618  | 0.205691 | 0.164033659  | 0.03681 | 0.172344534  | 0.027853 |
| ELP5      | 0.152741002  | 0.114031 | 0.199147619  | 0.03675 | 0.203113497  | 0.031858 |
| ZFAND3    | 0.226260159  | 0.068185 | 0.258585158  | 0.03676 | 0.197866197  | 0.110005 |
| BAIAP2L1  | 0.154216314  | 0.250758 | 0.279515986  | 0.03686 | 0.325817797  | 0.0149   |
| HERC3     | -0.437525433 | 0.07445  | -0.510051789 | 0.03691 | -0.357591045 | 0.144204 |
| GTF2E2    | 0.105095349  | 0.428778 | 0.275062806  | 0.03695 | 0.275606117  | 0.035991 |
| SYT14     | 0.798641412  | 0.255782 | 1.448859861  | 0.03712 | -0.035762285 | 0.960022 |
| HOXC11    | -0.182264707 | 0.814465 | -1.662423689 | 0.03714 | -0.106465258 | 0.890795 |
| RGS13     | -0.162586837 | 0.855123 | 1.800919047  | 0.03721 | -0.258330509 | 0.771144 |
| PMF1      | -0.102571225 | 0.317356 | -0.212971632 | 0.03728 | -0.008913874 | 0.929872 |
| PRSS23    | -0.248389956 | 0.21261  | -0.414319095 | 0.03734 | -0.835006654 | 2.80E-05 |
| MCTP1     | 0.670841968  | 0.069049 | 0.763020879  | 0.03742 | 0.106497146  | 0.773285 |
| TIPARP    | -0.297194239 | 0.176536 | -0.457202072 | 0.03755 | -0.140010958 | 0.523632 |

|            |              |          |              |         |              |          |
|------------|--------------|----------|--------------|---------|--------------|----------|
| MMRN1      | 0.899165117  | 0.268324 | 1.65679622   | 0.03762 | 0.842195815  | 0.294646 |
| TRIM36     | 0.416161886  | 0.359656 | 0.920415029  | 0.03766 | 0.296522335  | 0.50803  |
| TACR1      | 0.498644519  | 0.310456 | -1.039381012 | 0.03773 | -0.537772178 | 0.276514 |
| ARFIP1     | 0.216600091  | 0.155515 | 0.31526826   | 0.03784 | 0.081545054  | 0.591566 |
| DPT        | -1.430035752 | 0.050635 | -1.513099797 | 0.0378  | -1.512899386 | 0.03738  |
| HLA-DPA1   | -0.785893715 | 0.089101 | -0.948169671 | 0.03782 | -1.042225175 | 0.028642 |
| GPRIN3     | -0.443886919 | 0.159508 | -0.654912596 | 0.03788 | 0.193210466  | 0.538001 |
| LMO4       | -0.148535748 | 0.166066 | 0.221678217  | 0.03793 | 0.022532063  | 0.833041 |
| CTNNB1     | 0.128515464  | 0.178014 | 0.197827307  | 0.03804 | 0.230011432  | 0.015858 |
| NRBF2P5    | -0.278050853 | 0.623493 | -1.268514302 | 0.03808 | -0.264546564 | 0.634561 |
| AIF1L      | -0.222200727 | 0.418196 | -0.563900929 | 0.03812 | -0.528572549 | 0.051566 |
| GYG2       | -0.148583398 | 0.376306 | -0.347232979 | 0.03819 | -0.067375374 | 0.686429 |
| IGSF5      | -0.094177386 | 0.768289 | -0.696112142 | 0.03847 | -0.205263911 | 0.519556 |
| LDLRAD2    | -0.990005258 | 0.058552 | -1.040630668 | 0.03827 | -1.376121718 | 0.007505 |
| MTHFD1L    | 0.334691056  | 0.473269 | 0.951781149  | 0.03837 | 0.315437011  | 0.495167 |
| SGCE       | -0.028129018 | 0.856404 | 0.318482013  | 0.03845 | 0.391901016  | 0.010853 |
| SHPRH      | -0.109545253 | 0.4629   | -0.307722845 | 0.03851 | 0.015711637  | 0.91569  |
| STK32A     | 1.161901571  | 0.11386  | 1.501160738  | 0.0384  | 1.533673395  | 0.033847 |
| VASH1      | 0.209620067  | 0.282067 | 0.401943975  | 0.03843 | 0.083120145  | 0.669161 |
| GYLTL1B    | -0.379327517 | 0.252213 | -0.683634398 | 0.03857 | -0.744384597 | 0.025265 |
| NCL        | -0.073683783 | 0.580331 | -0.27549919  | 0.0387  | -0.081986509 | 0.538329 |
| JBE2F-SCL1 | -0.588789145 | 0.544663 | -2.066538638 | 0.03874 | -0.535875183 | 0.582229 |
| ADAMTS15   | 0.915988395  | 0.244006 | 1.620440044  | 0.03901 | -0.432105792 | 0.584005 |
| NDRG1      | -0.384064667 | 0.1916   | -0.607043455 | 0.03902 | -0.780765596 | 0.00794  |
| FAM101B    | 0.216502755  | 0.434028 | -0.57339155  | 0.03913 | 0.177347314  | 0.521171 |
| UBE2S      | 0.289656369  | 0.157125 | 0.420478538  | 0.0392  | 0.421163971  | 0.038433 |
| C14orf1    | 0.107006967  | 0.28688  | -0.20771832  | 0.0394  | -0.027489548 | 0.783848 |
| EBF3       | 0.397385133  | 0.690707 | 2.049833465  | 0.03949 | -0.987905416 | 0.325536 |
| EXOC1      | -0.000911411 | 0.994069 | 0.250142792  | 0.03953 | 0.103576136  | 0.394483 |
| KCNS3      | 0.037657908  | 0.84107  | 0.381230861  | 0.03946 | 0.259564601  | 0.161244 |
| NXPE3      | 0.334174077  | 0.052611 | 0.353368434  | 0.03952 | 0.31739942   | 0.064691 |
| RASSF3     | 0.097141295  | 0.475468 | -0.281469685 | 0.03952 | -0.013350158 | 0.921433 |
| ACBD7      | 0.325642966  | 0.171239 | 0.484088408  | 0.03966 | 0.334458826  | 0.156375 |
| MMGT1      | 0.010700278  | 0.917092 | 0.208428796  | 0.03964 | 0.153189261  | 0.13049  |
| SULT1E1    | -0.05018362  | 0.913154 | 0.945427919  | 0.03968 | -0.16027572  | 0.727558 |
| TRAPPC12   | 0.018541275  | 0.916543 | -0.365554175 | 0.03968 | -0.075413296 | 0.670131 |
| HABP2      | -0.502399602 | 0.181482 | -0.772689907 | 0.03988 | 0.575125165  | 0.125799 |
| TMTC1      | 0.156827441  | 0.473548 | 0.44614883   | 0.03989 | -0.387025025 | 0.079113 |
| TRPV1      | -0.010063717 | 0.989365 | -1.57064439  | 0.03988 | -0.193769554 | 0.797521 |
| KDSR       | 0.084845756  | 0.535089 | 0.279333341  | 0.04001 | -0.069909226 | 0.608371 |
| NR4A1      | 0.179542017  | 0.573531 | -0.657694919 | 0.04008 | -0.054111546 | 0.86532  |
| CDT1       | -0.445239362 | 0.073815 | -0.509606285 | 0.04028 | -0.714473222 | 0.004053 |
| GALNT9     | 0.496078234  | 0.370277 | 1.120896038  | 0.0402  | -0.03260416  | 0.953659 |
| GCSAML     | 0.146110161  | 0.72133  | 0.789745008  | 0.04029 | 0.409823105  | 0.295044 |
| HLX        | 0.218103019  | 0.509248 | -0.680726063 | 0.04023 | 0.04624902   | 0.888572 |
| MVB12A     | -0.154824518 | 0.274706 | -0.289044994 | 0.04037 | -0.388936894 | 0.005921 |
| TRMT44     | 0.286360682  | 0.051771 | 0.297019784  | 0.04036 | 0.192541902  | 0.183623 |

|              |              |          |              |         |              |          |
|--------------|--------------|----------|--------------|---------|--------------|----------|
| ARL16        | 0.414840537  | 0.099123 | 0.51306221   | 0.0404  | 0.351412284  | 0.161381 |
| TRPC3        | -0.507497732 | 0.297357 | -1.035816965 | 0.04041 | -0.385401819 | 0.414334 |
| LINGO1       | 0.478271238  | 0.06273  | -0.5471449   | 0.04058 | 0.312175547  | 0.224863 |
| !P1-145M24.  | 0.935741612  | 0.154633 | 1.291103622  | 0.04058 | 1.120981185  | 0.077536 |
| P11-466H18   | 0.143140491  | 0.302815 | 0.284107643  | 0.04055 | 0.082295246  | 0.553256 |
| SCD          | 0.127391949  | 0.453809 | -0.348285634 | 0.04058 | -0.319677461 | 0.060159 |
| MRPL46       | -0.048885193 | 0.69555  | 0.250006643  | 0.04063 | -0.03056395  | 0.803276 |
| MSTO2P       | 0.040432338  | 0.931989 | 0.934103939  | 0.04064 | 0.355890106  | 0.442386 |
| MRPL14       | -0.091114131 | 0.360753 | 0.199520662  | 0.0408  | 0.075232821  | 0.441801 |
| FRYL         | 0.183890706  | 0.079223 | 0.213703368  | 0.04085 | 0.040209584  | 0.700478 |
| NCSTN        | 0.040051945  | 0.753391 | -0.26115254  | 0.04084 | -0.12674673  | 0.320865 |
| PAK3         | 0.249459024  | 0.529413 | 0.80653307   | 0.04087 | 0.351376436  | 0.373757 |
| PDPK2        | -0.023337266 | 0.927192 | -0.529708277 | 0.04088 | -0.588375716 | 0.023132 |
| C1orf35      | -0.198619432 | 0.221727 | -0.331284366 | 0.04092 | -0.577105169 | 0.000394 |
| NAGK         | 0.150391771  | 0.45663  | 0.411107322  | 0.04098 | -0.025288598 | 0.899963 |
| PCDHGA11     | 0.377050404  | 0.705404 | -2.201143441 | 0.04101 | 0.268440153  | 0.78731  |
| !5orf38-AP3! | -0.243600452 | 0.082023 | -0.284541631 | 0.04107 | -0.09310388  | 0.500131 |
| OXA1L        | 0.194873439  | 0.068316 | -0.219337612 | 0.04106 | -0.123251318 | 0.249627 |
| CHRD1        | -0.197741195 | 0.659582 | -0.923946531 | 0.04122 | -0.485208276 | 0.280168 |
| NRM          | 0.223908572  | 0.164979 | -0.334644493 | 0.04124 | -0.06393822  | 0.69271  |
| LRRC4        | 0.245453143  | 0.412068 | -0.613343208 | 0.04134 | -0.360310207 | 0.228945 |
| RAB19        | 0.202668897  | 0.650222 | 0.871878603  | 0.04133 | 0.140704628  | 0.750392 |
| PPP4R4       | -0.194006784 | 0.730856 | 1.081541736  | 0.04146 | -0.171862976 | 0.753784 |
| GPC4         | -0.092422791 | 0.702773 | -0.494734171 | 0.04162 | -0.218110542 | 0.367259 |
| BBIP1        | 0.047144308  | 0.73854  | 0.285634938  | 0.04164 | 0.252241228  | 0.0726   |
| SLC18B1      | 0.039310563  | 0.812378 | 0.335669939  | 0.04168 | 0.521701561  | 0.001516 |
| FRRS1L       | 0.274615786  | 0.388432 | 0.638209833  | 0.04179 | -0.038749769 | 0.903386 |
| !SGALNACT    | -0.363696174 | 0.184701 | -0.557153745 | 0.04185 | -0.412510963 | 0.130496 |
| MYT1L        | 0.651804769  | 0.143162 | 0.883695769  | 0.04189 | 0.206930996  | 0.643226 |
| STAT1        | 0.090000012  | 0.4471   | 0.240131373  | 0.04193 | 0.382622984  | 0.001178 |
| STAM2        | 0.105544108  | 0.25025  | 0.185058903  | 0.04207 | 0.148669097  | 0.102382 |
| IL27RA       | 0.335709781  | 0.195804 | 0.523291265  | 0.04209 | 0.439637713  | 0.087892 |
| DTX3L        | 0.051127214  | 0.604973 | 0.199672831  | 0.04233 | 0.241962374  | 0.013754 |
| ARL1         | -0.008476272 | 0.927641 | 0.188315112  | 0.0425  | 0.110238826  | 0.235598 |
| KCNC4        | 0.741111484  | 0.081045 | 0.860107723  | 0.04255 | 0.001287485  | 0.997582 |
| C1orf174     | -0.000917352 | 0.992359 | 0.190207812  | 0.04257 | 0.1173931    | 0.210745 |
| CDRT4        | -0.421006721 | 0.40467  | -1.066177507 | 0.04262 | -0.767368044 | 0.131701 |
| COL21A1      | 1.03353396   | 0.226713 | 1.731365     | 0.04263 | -0.95034536  | 0.267889 |
| BRAF         | -0.037269109 | 0.699045 | -0.194913051 | 0.04272 | 0.031161055  | 0.744647 |
| DDIT4L       | 1.023205434  | 0.075893 | 1.1578944    | 0.04274 | 0.046802444  | 0.936867 |
| EFNA1        | -0.564208633 | 0.098039 | -0.690708625 | 0.04281 | -0.92706721  | 0.006589 |
| GALM         | -0.295215739 | 0.075176 | -0.334486146 | 0.04285 | -0.46628361  | 0.004844 |
| TMEM205      | -0.276033157 | 0.093397 | -0.331988789 | 0.0429  | -0.385709167 | 0.018693 |
| LTBP2        | 0.404042344  | 0.390375 | 0.946002986  | 0.04301 | -0.218106645 | 0.644117 |
| PRKAR2B      | 0.320549324  | 0.187526 | -0.494167469 | 0.0431  | 0.572328939  | 0.018309 |
| EXOC8        | -0.111144377 | 0.203795 | 0.171594066  | 0.04313 | 0.073848749  | 0.385137 |
| FERMT1       | -0.14297173  | 0.530416 | 0.459553629  | 0.04318 | -0.459557275 | 0.043805 |

|            |              |          |              |         |              |          |
|------------|--------------|----------|--------------|---------|--------------|----------|
| TRPC6      | 0.595975482  | 0.392498 | 1.404200219  | 0.04322 | -1.190178368 | 0.098776 |
| MTPN       | 0.080614601  | 0.252556 | 0.141594333  | 0.0434  | 0.129936056  | 0.063832 |
| GSDMB      | 0.199043163  | 0.338235 | 0.418272915  | 0.04351 | 0.072061179  | 0.728458 |
| SOAT1      | 0.149777809  | 0.223907 | 0.247538069  | 0.04355 | 0.485645257  | 7.23E-05 |
| SLC16A10   | 0.494587551  | 0.180229 | 0.741735519  | 0.04366 | 0.325819897  | 0.376848 |
| PPP6C      | -0.006990156 | 0.927662 | 0.1540334    | 0.04376 | 0.04569116   | 0.549011 |
| ZNF605     | -0.196091914 | 0.138732 | -0.265850117 | 0.04385 | -0.148349028 | 0.259607 |
| ASB13      | -0.343973771 | 0.090711 | -0.407132643 | 0.04398 | -0.327330219 | 0.105436 |
| U2AF1      | 0.260309448  | 0.202111 | 0.408580318  | 0.04404 | 0.315516484  | 0.120195 |
| TOR1AIP1   | 0.004115243  | 0.976965 | 0.28570286   | 0.04408 | 0.280307794  | 0.048304 |
| JRKL       | -0.13360023  | 0.259328 | 0.23029741   | 0.0442  | 0.004344382  | 0.969987 |
| AIDA       | 0.099272985  | 0.297255 | 0.190381007  | 0.04424 | 0.169156937  | 0.073658 |
| LRP12      | 0.208889307  | 0.26765  | 0.376963005  | 0.04428 | 0.24791026   | 0.18481  |
| KALRN      | -0.235913425 | 0.081981 | -0.272118087 | 0.04439 | -0.374474208 | 0.005672 |
| ADI1       | 0.24156778   | 0.185914 | 0.365162972  | 0.04449 | -0.241434227 | 0.186962 |
| FLRT2      | 0.42656267   | 0.236605 | 0.723955296  | 0.04452 | 0.230570263  | 0.522339 |
| CDH6       | 0.466868105  | 0.49025  | 1.358136742  | 0.04465 | 0.907204265  | 0.179917 |
| TNFSF11    | 0.659192618  | 0.333564 | 1.336735568  | 0.04464 | 1.118458541  | 0.092383 |
| EPS8L2     | -0.16406724  | 0.361579 | -0.360733998 | 0.0447  | -0.537929426 | 0.002764 |
| EPHA10     | 0.182438173  | 0.658244 | 0.80376468   | 0.04478 | 0.208502447  | 0.608806 |
| GNB2L1     | -0.212339507 | 0.061421 | -0.227760483 | 0.04479 | -0.156314539 | 0.168431 |
| P11-927P21 | 0.609113334  | 0.088681 | 0.710533138  | 0.04477 | 0.886258567  | 0.011689 |
| ARL6IP1    | 0.152787556  | 0.173777 | 0.224913138  | 0.04491 | 0.247789617  | 0.027124 |
| AAMP       | -0.103584619 | 0.413912 | -0.252820096 | 0.0451  | -0.22920495  | 0.069392 |
| ADCY1      | 0.033830601  | 0.935743 | 0.832774519  | 0.04512 | 0.342705013  | 0.412165 |
| DENND1C    | 0.054821359  | 0.762857 | -0.366276899 | 0.04505 | 0.03620757   | 0.841381 |
| PLEKHS1    | 0.184707137  | 0.784693 | 1.299110219  | 0.04509 | 0.042283562  | 0.950111 |
| PROSC      | 0.020122473  | 0.859724 | 0.226414652  | 0.0452  | -0.00194359  | 0.986277 |
| SLC12A6    | -0.197948908 | 0.211701 | 0.314901939  | 0.04522 | -0.124739328 | 0.42915  |
| SPOPL      | -0.2244209   | 0.107792 | -0.278832251 | 0.04512 | -0.125560713 | 0.366491 |
| ZC2HC1C    | 0.704079093  | 0.12767  | 0.924098596  | 0.04522 | 0.93378604   | 0.041148 |
| IL34       | 1.054651525  | 0.062151 | 1.128974681  | 0.04533 | 0.886654806  | 0.119437 |
| ARSI       | 0.064322869  | 0.847612 | -0.678073765 | 0.04544 | -0.16400121  | 0.624492 |
| FLI1       | 0.8230376    | 0.162257 | 1.170372834  | 0.04541 | 0.036850726  | 0.950257 |
| GABRB2     | 0.89584243   | 0.236534 | 1.458981968  | 0.04543 | -0.618340548 | 0.4277   |
| PLCXD1     | -0.228687789 | 0.261399 | -0.407498699 | 0.04541 | -0.232097288 | 0.253743 |
| CCDC38     | 0.364508533  | 0.478221 | 1.008817499  | 0.04569 | 0.677496968  | 0.182029 |
| KCTD13     | 0.159450024  | 0.440276 | -0.416753584 | 0.04574 | 0.064924995  | 0.752306 |
| SLC9A7     | 0.396364884  | 0.474293 | 1.077404597  | 0.04586 | 0.209547893  | 0.704265 |
| CDC27      | 0.175519392  | 0.233665 | 0.293358649  | 0.04611 | 0.413744999  | 0.004894 |
| WIF1       | 0.623593726  | 0.519705 | 1.91207529   | 0.04619 | -0.925582734 | 0.347802 |
| NCEH1      | 0.427978333  | 0.052419 | 0.439262824  | 0.04624 | 0.619421581  | 0.004841 |
| WIBG       | -0.143570077 | 0.133896 | -0.188942886 | 0.04637 | -0.115950058 | 0.218404 |
| COL6A3     | 0.496669113  | 0.051497 | 0.507945044  | 0.04641 | 0.113418507  | 0.65656  |
| CDON       | 0.200461843  | 0.513606 | -0.612022723 | 0.0466  | 0.19579059   | 0.523187 |
| BMP3       | -0.167914861 | 0.583587 | 0.607822404  | 0.0468  | -0.378019914 | 0.217152 |
| FSBP       | -0.702367104 | 0.068442 | -0.765365968 | 0.04677 | -0.301842968 | 0.430977 |

|             |              |          |              |         |              |          |
|-------------|--------------|----------|--------------|---------|--------------|----------|
| DCXR        | -0.01763615  | 0.916665 | -0.335790068 | 0.04687 | 0.026847628  | 0.872466 |
| MAP7D3      | 0.246736349  | 0.381658 | 0.559839417  | 0.04688 | 0.620974398  | 0.026895 |
| PCDHA7      | -0.035734006 | 0.987836 | -5.054268124 | 0.04687 | -3.006183023 | 0.208127 |
| CASP16      | 0.105226405  | 0.819473 | 0.862139322  | 0.047   | -0.342594117 | 0.459127 |
| SULT1A3     | -0.00842786  | 0.970643 | -0.456368221 | 0.04709 | -0.237963871 | 0.298647 |
| PLCH2       | -1.003707806 | 0.121943 | -1.30414946  | 0.04711 | -1.950751303 | 0.003501 |
| DHCR7       | 0.041444327  | 0.797614 | -0.320885172 | 0.04721 | -0.306513379 | 0.058021 |
| PIK3CA      | 0.181135988  | 0.26739  | 0.323013133  | 0.04725 | 0.363965233  | 0.025364 |
| P11-480I12. | -0.376611451 | 0.211313 | -0.596474092 | 0.04733 | -0.285639981 | 0.337404 |
| APOA1BP     | -0.237716555 | 0.058327 | -0.247818092 | 0.04738 | -0.31517548  | 0.011658 |
| KCNA6       | 1.081937681  | 0.072645 | 1.185363943  | 0.04743 | 0.311540868  | 0.611607 |
| LEFTY1      | 0.265745057  | 0.65199  | 1.138176025  | 0.04748 | 0.809593666  | 0.161075 |
| HOXB6       | 0.336065874  | 0.329406 | -0.695208837 | 0.04755 | -0.231728091 | 0.502902 |
| ARL4A       | 0.021021192  | 0.928079 | 0.456766714  | 0.0478  | -0.551159215 | 0.018067 |
| ATP9A       | 0.055849896  | 0.570062 | 0.193971223  | 0.04792 | -0.046760628 | 0.633988 |
| DACH2       | -1.213125412 | 0.114425 | -1.502535522 | 0.04793 | -0.704489073 | 0.33271  |
| FAM151B     | 0.109919603  | 0.744731 | 0.639413125  | 0.04786 | -0.229997491 | 0.489009 |
| INRNP4P4    | 0.145036197  | 0.646282 | 0.622292817  | 0.04775 | 0.142831272  | 0.650478 |
| INPP4B      | -0.082664012 | 0.76874  | 0.554600463  | 0.04784 | -0.326589843 | 0.245705 |
| NIPAL2      | 0.094200188  | 0.601402 | 0.35459751   | 0.04782 | 0.063684461  | 0.723253 |
| ONECUT3     | -0.096252163 | 0.737151 | -0.568873655 | 0.04787 | -0.187915658 | 0.511813 |
| TMPRSS15    | 0.918380351  | 0.406196 | 2.154615591  | 0.04792 | -0.436772157 | 0.708835 |
| ZCCHC12     | 0.133800822  | 0.794546 | -1.093826269 | 0.04776 | -0.414247595 | 0.428102 |
| LRRC3B      | 0.836058378  | 0.282196 | 1.498737707  | 0.04805 | 0.209747821  | 0.791268 |
| RLF         | -0.157827097 | 0.076566 | -0.175716413 | 0.04806 | 0.090700872  | 0.30554  |
| PARP9       | 0.15090449   | 0.233889 | 0.249479255  | 0.04811 | 0.353199992  | 0.005026 |
| FOSL2       | 0.002772677  | 0.990216 | -0.44679565  | 0.04826 | -0.506621914 | 0.025099 |
| NDST3       | -0.241923081 | 0.448033 | -0.630939759 | 0.04826 | -0.172155476 | 0.588245 |
| PCOLCE      | 0.580655848  | 0.063116 | 0.616750637  | 0.04828 | 0.053373702  | 0.864455 |
| NUPR1       | 0.179293914  | 0.640176 | 0.75328915   | 0.04836 | -0.136091722 | 0.722504 |
| TRAM1L1     | -0.402264693 | 0.181873 | -0.595741494 | 0.04833 | -0.446071328 | 0.133729 |
| DYNC1H1     | 0.131934786  | 0.236553 | 0.219892131  | 0.04839 | 0.084373864  | 0.448869 |
| RAD52       | -0.192113717 | 0.420792 | -0.468682139 | 0.04844 | 0.149677494  | 0.52669  |
| MAMSTR      | -0.211145471 | 0.543883 | -0.709939724 | 0.04847 | -0.479690133 | 0.171188 |
| TPSG1       | -0.179561251 | 0.734074 | -1.102121119 | 0.04849 | -0.081366323 | 0.876934 |
| CEACAM7     | 0.712598935  | 0.19523  | 1.083782696  | 0.04866 | 0.572283138  | 0.298233 |
| TGIF1       | 0.209769088  | 0.092949 | 0.244528315  | 0.04881 | 0.136984394  | 0.269733 |
| TMEM26      | 0.194851681  | 0.639347 | 0.814193124  | 0.04879 | 0.021705574  | 0.958368 |
| NFRKB       | 0.00366771   | 0.969785 | -0.190728542 | 0.04886 | 0.055597813  | 0.563497 |
| PTN         | 0.262910949  | 0.454243 | 0.690944494  | 0.04901 | 0.4225832    | 0.228747 |
| KDM3A       | -0.200887185 | 0.234635 | -0.332305522 | 0.04929 | -0.114746436 | 0.496855 |
| MMP16       | 0.17588732   | 0.679603 | 0.835645605  | 0.04935 | -0.03707477  | 0.930612 |
| NTRK1       | 0.443075749  | 0.657697 | 1.909955738  | 0.04936 | -0.091468286 | 0.932226 |
| FAM109A     | 0.02297794   | 0.883847 | 0.30276878   | 0.04947 | -0.171358053 | 0.273436 |
| PEMT        | 0.008876568  | 0.960548 | -0.353469629 | 0.04947 | -0.225224253 | 0.208785 |
| SLC5A2      | 0.688156943  | 0.193345 | 1.020722947  | 0.04945 | 0.457096961  | 0.380916 |
| CLEC3B      | 1.41059792   | 0.16567  | 1.980224212  | 0.04959 | -0.694885236 | 0.514401 |

|            |              |          |              |         |              |          |
|------------|--------------|----------|--------------|---------|--------------|----------|
| HOXD3      | -0.075344434 | 0.892287 | -1.111870147 | 0.04957 | -0.583752933 | 0.298775 |
| LRTOMT     | -0.559629819 | 0.065888 | -0.589975433 | 0.04958 | -0.37864211  | 0.207174 |
| ISOC2      | -0.157276086 | 0.233691 | -0.257890036 | 0.0499  | -0.564362874 | 2.28E-05 |
| PUS3       | 0.031541603  | 0.873401 | 0.382586129  | 0.04991 | 0.329877504  | 0.090903 |
| UBXN7      | 0.186149886  | 0.193414 | 0.280332706  | 0.04993 | 0.26197057   | 0.066601 |
| ABCC11     | -0.075186305 | 0.928623 | 2.026690276  | 0.00738 | 0.08604663   | 0.912867 |
| AC018804.6 | -2.076606243 | 0.174805 | -4.822643038 | 0.00467 | -2.366627831 | 0.123431 |
| AC019100.7 | -1.33834493  | 0.064793 | -1.966736631 | 0.00956 | -1.362867839 | 0.055547 |
| AC073150.6 | -0.656515679 | 0.417839 | -1.733896528 | 0.04885 | -2.384568364 | 0.011972 |
| AC079834.1 | 0.052796801  | 0.974493 | 2.761264061  | 0.04625 | 1.558506126  | 0.293072 |
| AC092933.4 | 1.004889637  | 0.157849 | 1.53247845   | 0.02536 | 1.335980825  | 0.052706 |
| ACTBP8     | 2.292364838  | 0.103552 | 3.188592547  | 0.01729 | 2.120699082  | 0.130561 |
| AGRP       | -0.660611406 | 0.482391 | -2.795183581 | 0.0285  | -0.001095974 | 0.998998 |
| ALOX5AP    | 1.090711114  | 0.340287 | 2.386853923  | 0.02887 | -1.039563058 | 0.437934 |
| ALOXE3     | 0.947417152  | 0.57775  | 3.943460038  | 0.00818 | -0.218037308 | 0.8999   |
| APOL3      | 1.331048688  | 0.075606 | 1.540264893  | 0.03667 | 0.995185414  | 0.191812 |
| AQP9       | 0.633858064  | 0.664227 | 2.642111329  | 0.04516 | 2.331886262  | 0.079055 |
| BTF3L4P1   | -0.336922539 | 0.617992 | -1.623027119 | 0.02873 | -1.577011312 | 0.03149  |
| CEACAM18   | 1.517126139  | 0.261945 | 2.648781197  | 0.04133 | 1.401680136  | 0.297444 |
| CER1       | 0.744897681  | 0.463257 | 2.300476635  | 0.01248 | 1.619322325  | 0.086206 |
| CLDN8      | -2.362865393 | 0.159118 | -5.262891761 | 0.00551 | -4.653325163 | 0.013312 |
| CLEC2A     | -0.587848252 | 0.274284 | -1.218801781 | 0.02824 | -1.93001042  | 0.00107  |
| CR2        | 1.233429614  | 0.083145 | 2.039595601  | 0.00213 | 1.799550927  | 0.00775  |
| CTLA4      | 2.769526667  | 0.267711 | 5.644887196  | 0.01894 | 1.689999875  | 0.505682 |
| CYP2D6     | -3.255632444 | 0.170893 | -5.213440718 | 0.03068 | -4.527335055 | 0.060551 |
| DLX2       | 2.598041279  | 0.072901 | 3.638651926  | 0.011   | 0.818454235  | 0.584796 |
| DLX6       | -0.71239541  | 0.676524 | 3.294176191  | 0.02049 | -0.285528735 | 0.857615 |
| DRC1       | -0.542244926 | 0.548507 | 2.102104983  | 0.00984 | 0.551329783  | 0.528335 |
| ECHDC3     | -1.082164083 | 0.163936 | -1.732830751 | 0.04316 | -0.827188563 | 0.283967 |
| EEF1GP3    | 0.052796793  | 0.975864 | 2.924863387  | 0.04929 | 1.878980952  | 0.226725 |
| EPGN       | 3.275142647  | 0.063367 | 3.565676128  | 0.03945 | 1.384241529  | 0.45292  |
| FAM86GP    | -1.131027853 | 0.471184 | -3.762108059 | 0.02954 | -2.344344546 | 0.168565 |
| FBXO39     | 2.105356195  | 0.266114 | 3.451625427  | 0.04954 | 2.445639536  | 0.177958 |
| FCAMR      | 1.545070619  | 0.109496 | 1.993251539  | 0.03711 | 1.744022948  | 0.06985  |
| FGL1       | 1.130810782  | 0.345785 | 2.956260956  | 0.01182 | 0.406798924  | 0.739704 |
| FITM1      | 0.357084263  | 0.698827 | 1.715107904  | 0.03998 | 1.104970779  | 0.190794 |
| FRG1B      | 0.653144941  | 0.506167 | 1.87121569   | 0.04276 | -0.57430588  | 0.588141 |
| FTH1P23    | 1.126575032  | 0.230877 | 1.887994147  | 0.03573 | 1.149237947  | 0.214773 |
| GAPDHP33   | 2.539388229  | 0.067782 | 3.070437943  | 0.02268 | 1.782705892  | 0.214762 |
| GAPT       | 0.192812952  | 0.849791 | 2.812365548  | 0.00236 | 0.046909036  | 0.963019 |
| GCNT6      | 0.052796787  | 0.9767   | 3.123340469  | 0.04942 | 2.850570816  | 0.075609 |
| GDF5       | -1.325953681 | 0.105588 | -1.867472532 | 0.02998 | -2.710913548 | 0.005301 |
| GJA3       | 0.16674921   | 0.843672 | 1.694278024  | 0.03367 | -0.678159656 | 0.44084  |
| GJD4       | 0.253465117  | 0.708296 | 1.238286464  | 0.04645 | 0.322292385  | 0.624732 |
| GLRA2      | -1.162227034 | 0.105827 | -1.604262349 | 0.03994 | -1.199827491 | 0.089308 |
| GOLGA6A    | 0.052796788  | 0.976633 | 3.070303185  | 0.04266 | 3.018657778  | 0.047951 |
| GRAMD2     | 1.158396379  | 0.134934 | 1.52820142   | 0.04564 | 0.778027723  | 0.332386 |



|              |              |          |              |         |              |          |
|--------------|--------------|----------|--------------|---------|--------------|----------|
| GRM1         | 0.816246865  | 0.311031 | 1.632102525  | 0.03077 | 1.494552035  | 0.050449 |
| HEY2         | 1.481685124  | 0.065159 | 2.450512262  | 0.00155 | 0.043953171  | 0.959741 |
| HMGB3P32     | -1.74829642  | 0.160167 | -2.627687505 | 0.03895 | -1.417371637 | 0.210289 |
| HOXD13       | -2.833008733 | 0.077879 | -4.236774521 | 0.01256 | -0.070062614 | 0.963809 |
| HSPD1P2      | 0.052796779  | 0.977722 | 3.484858039  | 0.03618 | 2.71717787   | 0.11149  |
| IL4I1        | 0.995254063  | 0.307307 | 2.955778438  | 0.00132 | 1.782903171  | 0.056998 |
| KCNG3        | 1.373997685  | 0.151213 | 2.277067172  | 0.01326 | 0.310825842  | 0.757969 |
| KRT18P41     | 2.083179126  | 0.234961 | 3.522175226  | 0.0293  | 2.290297131  | 0.178271 |
| KRT8P51      | -0.086936263 | 0.92803  | -3.65672555  | 0.00503 | -1.682745484 | 0.146225 |
| LDHAL6EP     | -0.081988947 | 0.902586 | -1.778871691 | 0.02167 | -0.51658109  | 0.446567 |
| LINC00537    | -0.589825751 | 0.675405 | -4.02228193  | 0.01487 | -4.087974197 | 0.013316 |
| JC10042116   | 1.475222272  | 0.406359 | 3.582811468  | 0.0207  | 1.223003955  | 0.491209 |
| LPPR1        | 1.178510036  | 0.225591 | 2.642717689  | 0.00331 | 0.589582102  | 0.537802 |
| LY86         | -1.481923005 | 0.235567 | -3.746509884 | 0.00787 | -0.726262556 | 0.52107  |
| MTND5P25     | 0.645043196  | 0.650663 | 2.903137099  | 0.01645 | 2.163999837  | 0.081396 |
| MTNR1A       | 1.227589038  | 0.247299 | 2.267466906  | 0.02277 | 2.61328755   | 0.007848 |
| NEPNP        | 0.712077835  | 0.687362 | 3.192932141  | 0.03579 | 0.579525849  | 0.74162  |
| NHLH1        | 2.009693003  | 0.178335 | 3.498947309  | 0.00795 | 1.264591052  | 0.420708 |
| NINJ2        | -0.915283234 | 0.19439  | -1.511412569 | 0.04817 | -2.114387216 | 0.006913 |
| NPM1P47      | 2.173481406  | 0.147669 | 3.071679559  | 0.03182 | 2.582446107  | 0.075596 |
| NSG2         | 1.513835572  | 0.476496 | 4.428347108  | 0.02216 | 3.351768451  | 0.082255 |
| OC90         | -1.033341871 | 0.49958  | 3.773460881  | 0.00368 | -0.613960487 | 0.671485 |
| OPCML        | 2.934405817  | 0.110175 | 4.668542722  | 0.01149 | 3.281121485  | 0.073155 |
| OR10AE1P     | 1.726950424  | 0.245125 | 3.318853961  | 0.01418 | -0.183523739 | 0.911287 |
| PAX8         | 0.897736168  | 0.260466 | 1.638937357  | 0.0323  | 0.992250556  | 0.211468 |
| PCP2         | 0.002614848  | 0.996574 | -1.557619582 | 0.02999 | -0.59135114  | 0.357075 |
| PES1P2       | 2.069463651  | 0.165063 | 3.30748321   | 0.01349 | 2.242665475  | 0.117472 |
| PGR          | -0.475387589 | 0.752247 | 3.14989357   | 0.01828 | -1.027942374 | 0.497684 |
| PKLR         | 0.781911947  | 0.676917 | 3.250307532  | 0.04996 | 2.342588265  | 0.174887 |
| PPEF1        | 1.238277169  | 0.14316  | 2.156394301  | 0.00825 | -0.002896974 | 0.99737  |
| PSKH2        | -2.556157793 | 0.109625 | -3.363815799 | 0.03526 | -0.910859475 | 0.521278 |
| REG3A        | 1.690013214  | 0.146628 | 2.496520465  | 0.02819 | 3.225062686  | 0.004201 |
| RP1-161N10.  | 2.527335395  | 0.077961 | 2.915470217  | 0.03714 | 1.476287308  | 0.329101 |
| RP11-1035H13 | 4.032194189  | 0.06954  | 4.724474022  | 0.03198 | 5.244240552  | 0.016918 |
| RP11-129B9.  | 2.335979911  | 0.06745  | 2.984406517  | 0.01612 | 2.227539406  | 0.079517 |
| RP11-144N1.  | 0.170719005  | 0.803812 | 1.310611204  | 0.03059 | 0.950125475  | 0.124894 |
| RP11-168J18  | 2.535904246  | 0.069216 | 2.939958689  | 0.03053 | 1.936707697  | 0.174584 |
| RP11-208P4.  | 1.291604371  | 0.118306 | 1.982618283  | 0.01268 | 1.252112191  | 0.12594  |
| RP11-215A21  | 1.28801817   | 0.329218 | 2.42691327   | 0.04636 | 2.634403158  | 0.028905 |
| RP11-227H15  | 2.381804839  | 0.081004 | 3.601452254  | 0.0051  | 1.173854451  | 0.42741  |
| RP11-349N19  | -1.046570456 | 0.392985 | -2.728335394 | 0.04416 | -0.641956719 | 0.59204  |
| RP11-34E5.4  | 1.839189515  | 0.051989 | 1.902714522  | 0.04224 | 2.205055117  | 0.017097 |
| RP11-365D23  | -0.19143845  | 0.854849 | -3.218490306 | 0.01949 | 0.475371169  | 0.631992 |
| RP11-375N9.  | 2.775009233  | 0.107648 | 3.322790485  | 0.04727 | 1.880327323  | 0.294837 |
| RP11-3L10.2  | -1.022253997 | 0.065077 | -1.568436632 | 0.00641 | -1.074417685 | 0.048855 |
| RP11-404O13  | 0.609222589  | 0.603525 | 2.251561594  | 0.03373 | 0.660314187  | 0.564459 |
| RP11-454P7.  | -0.691298396 | 0.528396 | -3.233778193 | 0.02244 | -0.073543975 | 0.944429 |

|             |              |          |              |         |              |          |
|-------------|--------------|----------|--------------|---------|--------------|----------|
| P11-461G12  | 0.745608264  | 0.659035 | 3.059001912  | 0.03334 | 1.083255495  | 0.500623 |
| P11-54D18.  | -1.050492699 | 0.321508 | -2.575552427 | 0.04998 | -2.634198331 | 0.041883 |
| P11-578F21  | 2.52794459   | 0.060413 | 2.693478269  | 0.04384 | 1.434737086  | 0.299489 |
| RP11-58O9.  | 2.350987155  | 0.062194 | 2.562770936  | 0.03891 | 1.123577352  | 0.40186  |
| P11-599J14  | 0.945238121  | 0.217922 | 1.846176612  | 0.01091 | 1.602431465  | 0.02828  |
| P11-744O11  | -0.431100086 | 0.399708 | -1.17219624  | 0.03298 | -1.553721823 | 0.006944 |
| RP11-764I5. | 2.125092333  | 0.134268 | 2.766260299  | 0.0414  | 2.168411652  | 0.119796 |
| P11-812I20. | -0.123287704 | 0.809283 | -1.537998384 | 0.01061 | -0.035138748 | 0.943543 |
| P11-93O17.  | 0.770697926  | 0.566866 | 2.94461961   | 0.0187  | 0.519939558  | 0.699483 |
| P5-1109J22  | 1.467908556  | 0.123095 | 2.008723715  | 0.03019 | -1.087853448 | 0.362878 |
| RPL21P39    | 1.412315583  | 0.497034 | 3.901915995  | 0.03701 | 3.437220373  | 0.06841  |
| RPL35AP32   | -0.131549164 | 0.87471  | -3.279707188 | 0.0078  | -0.315827136 | 0.703495 |
| RPS21P4     | 0.348138853  | 0.678526 | 1.56873048   | 0.04045 | 1.207173284  | 0.120098 |
| RPS3P2      | 0.585967632  | 0.431544 | 1.385062557  | 0.04957 | 0.573451275  | 0.434446 |
| RPS4XP6     | 0.760568358  | 0.310473 | 1.748856755  | 0.01199 | 0.788669414  | 0.282688 |
| RPS7P3      | 2.887594849  | 0.056415 | 3.141803158  | 0.03532 | 3.285537508  | 0.026933 |
| RSL24D1P8   | 0.104777709  | 0.951442 | 2.878516424  | 0.04928 | 0.407151063  | 0.804661 |
| RXFP2       | -0.261273941 | 0.877605 | 3.579111809  | 0.02393 | 0.448327482  | 0.78512  |
| SCOCP1      | 0.670775779  | 0.532488 | -2.882988176 | 0.04302 | 0.056114505  | 0.959213 |
| SERTM1      | 0.745540636  | 0.451978 | 2.095777027  | 0.02631 | -1.064648826 | 0.342789 |
| SETP5       | -0.756668377 | 0.394296 | -3.055165621 | 0.01444 | -0.353962666 | 0.673288 |
| SIGLEC9     | 1.796264726  | 0.322627 | 3.397497807  | 0.04248 | 2.744508079  | 0.113248 |
| SLC10A6     | 2.402369436  | 0.163967 | 3.79097223   | 0.01893 | 0.497767054  | 0.789276 |
| SLCO6A1     | -0.464605853 | 0.540722 | -2.705207367 | 0.00355 | -0.41916851  | 0.589247 |
| SPACA3      | -0.371208289 | 0.479924 | -1.730585505 | 0.00576 | -1.448494299 | 0.013997 |
| SPRR2E      | 2.000959109  | 0.293182 | 4.069107453  | 0.0197  | 2.835904518  | 0.115177 |
| SVILP1      | 0.702455756  | 0.727506 | 3.833073922  | 0.03179 | 1.260216889  | 0.499312 |
| TAF7L       | 1.265338486  | 0.137007 | 1.959952186  | 0.01485 | 1.623175767  | 0.04813  |
| TAS2R63P    | -0.957815543 | 0.089064 | -1.294582781 | 0.02423 | -0.563538085 | 0.287993 |
| TCHH        | 0.05279676   | 0.979623 | 4.053535504  | 0.02769 | 1.929069398  | 0.327983 |
| TMEM178B    | 2.130356295  | 0.074135 | 2.504264026  | 0.033   | 0.993855884  | 0.404611 |
| TOMM20L     | -1.103347086 | 0.2215   | -1.927334232 | 0.04536 | -0.134376592 | 0.866111 |
| TPT1P4      | -0.033565758 | 0.965155 | 1.817291713  | 0.0065  | 0.721589905  | 0.305331 |
| TPT1P5      | 0.117205832  | 0.910657 | 2.02498162   | 0.02153 | 1.293419978  | 0.156647 |
| TRIM60P14   | -2.179043984 | 0.257253 | -3.833622385 | 0.04904 | 0.840559365  | 0.619174 |
| WFIKKN2     | 1.376294176  | 0.419334 | 3.431156714  | 0.02106 | 2.988852984  | 0.04631  |
| XCL1        | -1.113085397 | 0.116874 | -1.622391222 | 0.02731 | -1.503600885 | 0.036959 |
| XKR7        | 1.837647168  | 0.091668 | 2.839758505  | 0.00762 | 0.507918465  | 0.655498 |
| ZFAND6P1    | 0.112378747  | 0.915788 | -3.227416284 | 0.02176 | -0.958095245 | 0.396738 |
| ZNF355P     | 0.11714328   | 0.907169 | -3.245391175 | 0.01887 | -1.644228964 | 0.137549 |
| ZNF648      | 1.243134052  | 0.281397 | 2.96101872   | 0.00609 | 0.61664242   | 0.602527 |
| TPD52L1     | -0.409989695 | 0.060442 | -0.304556935 | 0.15806 | -1.147021202 | 1.75E-07 |
| RNF114      | -6.683869548 | 0.107729 | -0.377714205 | 0.92534 | -20.77830528 | 5.72E-07 |
| TRABD2A     | -0.289677062 | 0.280438 | -0.241442108 | 0.36529 | -1.361316373 | 6.01E-07 |
| VWA2        | -0.116070757 | 0.793266 | -0.319463174 | 0.47093 | -2.436859947 | 7.77E-07 |
| ST3GAL5     | 0.337855176  | 0.053261 | 0.330646362  | 0.05694 | 0.840814674  | 9.09E-07 |
| STARD3NL    | 0.026928262  | 0.731157 | 0.112944601  | 0.14224 | 0.361187412  | 2.05E-06 |

|           |              |          |              |         |              |          |
|-----------|--------------|----------|--------------|---------|--------------|----------|
| TM4SF18   | 0.202572293  | 0.503187 | -0.264342372 | 0.38628 | -1.477195641 | 2.54E-06 |
| PVRL1     | -0.275838536 | 0.151626 | -0.131400148 | 0.49361 | -0.890373158 | 4.25E-06 |
| FNBP4     | 0.218817202  | 0.081459 | 0.100565487  | 0.42296 | 0.573799776  | 4.42E-06 |
| HNRNPH1   | 0.140914181  | 0.175266 | 0.124407543  | 0.23123 | 0.476377569  | 4.50E-06 |
| ID2       | 0.219501616  | 0.201423 | 0.012251146  | 0.94312 | 0.783773568  | 4.74E-06 |
| VDR       | -0.360998488 | 0.141711 | -0.399220542 | 0.10141 | -1.088583727 | 1.38E-05 |
| GPR56     | -0.36018529  | 0.131001 | -0.342800352 | 0.14951 | -1.034337507 | 1.54E-05 |
| NPNT      | -0.407611836 | 0.127321 | -0.10770723  | 0.68627 | -1.160047673 | 1.59E-05 |
| GSTK1     | -0.158919094 | 0.05947  | -0.116125708 | 0.16494 | -0.362940423 | 1.60E-05 |
| CCNL1     | 0.162001996  | 0.203004 | 0.032593217  | 0.79775 | 0.544840733  | 1.74E-05 |
| DDX5      | 0.059315626  | 0.527014 | 0.152722369  | 0.10294 | 0.397546734  | 2.16E-05 |
| APOBEC3B  | 0.432769435  | 0.09016  | 0.490103042  | 0.05374 | 1.043333318  | 3.39E-05 |
| CLSTN1    | -0.135672967 | 0.09187  | -0.127609284 | 0.11174 | -0.329559908 | 4.24E-05 |
| PPIC      | -0.245507193 | 0.102669 | -0.056557578 | 0.70499 | -0.607555388 | 5.62E-05 |
| C5orf63   | -0.504031456 | 0.216273 | -0.094234541 | 0.81444 | -1.676590688 | 6.18E-05 |
| SNX10     | -1.132936296 | 0.118518 | -1.390548506 | 0.05712 | -3.462356681 | 6.40E-05 |
| ST6GALNAC | 0.212109673  | 0.150651 | 0.071377034  | 0.62789 | 0.580107328  | 7.48E-05 |
| PSD3      | -0.217138715 | 0.161806 | -0.003916458 | 0.97983 | -0.614479004 | 7.57E-05 |
| RAMP1     | -0.39316607  | 0.112435 | -0.286965304 | 0.24344 | -0.987085487 | 7.56E-05 |
| EEF1DP3   | -0.503332409 | 0.088805 | -0.178560478 | 0.54189 | -1.184552395 | 8.10E-05 |
| IRX5      | -0.552703231 | 0.116296 | -0.019797289 | 0.95396 | -1.439425483 | 8.22E-05 |
| MPHOSPH1C | -0.058312671 | 0.713568 | -0.092354718 | 0.55915 | 0.617808308  | 8.46E-05 |
| ZDHHC12   | -0.196674057 | 0.236672 | -0.074402522 | 0.65005 | -0.658877128 | 8.59E-05 |
| ZNF579    | 0.026593663  | 0.908795 | -0.248519776 | 0.28495 | -0.935818865 | 9.05E-05 |
| MCF2L     | -0.447659657 | 0.060806 | -0.448428173 | 0.05858 | -0.921490384 | 0.000111 |
| RSPRY1    | 0.113916706  | 0.301327 | 0.210042796  | 0.05576 | 0.421633645  | 0.000117 |
| NLRX1     | -0.312054182 | 0.084093 | -0.048110925 | 0.78794 | -0.694305937 | 0.000138 |
| SLC6A8    | -0.016129473 | 0.955879 | 0.028659188  | 0.92167 | -1.112085955 | 0.00014  |
| SH3RF2    | -0.37178301  | 0.0608   | -0.357162335 | 0.07129 | -0.743299999 | 0.00018  |
| MUC5B     | -1.035376004 | 0.072419 | -0.121902368 | 0.83241 | -2.15032817  | 0.000193 |
| RNPEPL1   | -0.248372982 | 0.125859 | -0.222154586 | 0.17023 | -0.60423175  | 0.000201 |
| GC        | -0.001438374 | 0.997103 | 0.391928958  | 0.31828 | 1.44396698   | 0.00021  |
| ADORA2B   | -0.236047333 | 0.329622 | -0.054852354 | 0.81884 | -0.903950281 | 0.000238 |
| PMVK      | -0.348409171 | 0.069115 | -0.188725386 | 0.31382 | -0.71065057  | 0.000241 |
| SLC38A10  | -0.159835248 | 0.112664 | -0.175107846 | 0.08112 | -0.369624512 | 0.000247 |
| ITM2C     | -0.024747761 | 0.854982 | -0.231058916 | 0.08787 | -0.496320705 | 0.000248 |
| ILF2      | 0.018056871  | 0.832483 | 0.098425493  | 0.24781 | 0.310329868  | 0.00026  |
| PSMD6     | -0.061906733 | 0.494309 | 0.13171997   | 0.14327 | 0.326023089  | 0.000268 |
| ME3       | -0.261827959 | 0.110557 | -0.220770595 | 0.17139 | -0.59769335  | 0.000283 |
| VTCN1     | -0.2591445   | 0.361663 | -0.333018928 | 0.24017 | -1.043849591 | 0.000291 |
| GNG5      | 0.095542409  | 0.348188 | 0.10074318   | 0.32149 | 0.366476905  | 0.000297 |
| C1orf172  | -0.304013551 | 0.415842 | -0.598257437 | 0.10978 | -1.367276782 | 0.000302 |
| GATA5     | -0.085689666 | 0.845758 | 0.152122799  | 0.72801 | -1.655249996 | 0.000303 |
| SUMO1     | 0.066901634  | 0.581127 | 0.226925875  | 0.06054 | 0.435893944  | 0.000306 |
| RHEB      | 0.109308828  | 0.165788 | 0.090532827  | 0.24682 | 0.280182217  | 0.000307 |
| TCN2      | -0.21826658  | 0.21809  | -0.281015096 | 0.11108 | -0.638561469 | 0.000329 |
| NRAS      | 0.052313832  | 0.453142 | 0.117441302  | 0.09045 | 0.248020751  | 0.000334 |

|             |              |          |              |         |              |          |
|-------------|--------------|----------|--------------|---------|--------------|----------|
| LRRTM3      | -1.167147974 | 0.115428 | -0.65980109  | 0.36831 | -2.672370785 | 0.000355 |
| RPS6KB1     | 0.179727016  | 0.064456 | 0.068796079  | 0.47772 | 0.343715208  | 0.000364 |
| CCNJ        | 0.110782141  | 0.429577 | 0.087844924  | 0.52928 | 0.492226047  | 0.000375 |
| ZBTB33      | -0.038795637 | 0.680751 | 0.006567216  | 0.94398 | 0.328653228  | 0.00039  |
| CLIC6       | -0.421538865 | 0.222926 | -0.049944018 | 0.88503 | -1.222484428 | 0.000419 |
| IYD         | -0.514683058 | 0.085755 | -0.373303827 | 0.20948 | -1.054920606 | 0.000447 |
| PNCK        | -0.026511695 | 0.940999 | 0.146547577  | 0.68234 | -1.26444101  | 0.000454 |
| EPHB4       | -0.129174552 | 0.201622 | -0.11358951  | 0.26004 | -0.354311402 | 0.000461 |
| GALNT18     | -0.419390582 | 0.054921 | -0.131318981 | 0.53686 | -0.77078963  | 0.000462 |
| IP11-310H4. | -1.121053315 | 0.07952  | -0.575224275 | 0.35798 | -2.346227064 | 0.000476 |
| SDF2L1      | -0.368642169 | 0.076338 | -0.32665172  | 0.11159 | -0.732637435 | 0.000479 |
| SIL1        | -0.237399503 | 0.086729 | -0.113992991 | 0.40623 | -0.479250288 | 0.000521 |
| OSBP2       | -0.456671568 | 0.153744 | -0.00064048  | 0.99836 | -1.150532738 | 0.000532 |
| EIF2B2      | 0.19055702   | 0.073715 | 0.13078885   | 0.21712 | 0.362945351  | 0.000554 |
| ALS2        | 0.080360264  | 0.401816 | 0.166426444  | 0.08131 | 0.328757248  | 0.000556 |
| TPX2        | 0.209153731  | 0.230123 | 0.131913447  | 0.44895 | 0.59922965   | 0.000572 |
| PPP4R1      | 0.154975203  | 0.146504 | 0.137482275  | 0.1962  | 0.364881639  | 0.000592 |
| RNF25       | 0.207180585  | 0.098737 | 0.196857419  | 0.11339 | 0.421853393  | 0.000597 |
| HS1BP3      | -0.297440754 | 0.106381 | -0.150713923 | 0.40388 | -0.62792072  | 0.0006   |
| L1TD1       | 0.525896825  | 0.222731 | 0.40131294   | 0.352   | 1.474635563  | 0.000601 |
| ELMO3       | -0.183241186 | 0.178318 | 0.052343323  | 0.69185 | -0.466805874 | 0.000621 |
| GGACT       | -0.379684398 | 0.169406 | 0.228136274  | 0.3724  | -0.933815004 | 0.000622 |
| TOP3B       | 0.108296568  | 0.359227 | 0.177556252  | 0.12877 | 0.397911755  | 0.000635 |
| JRRC37A16F  | 0.243097655  | 0.12291  | 0.276403897  | 0.0779  | 0.535035877  | 0.00064  |
| HBS1L       | -0.000236621 | 0.997886 | 0.153091542  | 0.08431 | 0.301732726  | 0.000647 |
| SALL4       | 0.3103703    | 0.181162 | 0.167116781  | 0.4718  | 0.787850428  | 0.000648 |
| NME3        | -0.46251148  | 0.054806 | -0.150704299 | 0.51855 | -0.82247903  | 0.000694 |
| PRSS1       | -0.869719435 | 0.100479 | 0.122219603  | 0.8174  | -1.793146522 | 0.000711 |
| WWC1        | 0.35107013   | 0.059365 | 0.091085215  | 0.62475 | 0.627714403  | 0.00072  |
| RBM5        | 0.116085052  | 0.21462  | 0.112030221  | 0.23018 | 0.313975968  | 0.00075  |
| SNAP23      | 0.178255277  | 0.155429 | 0.244792324  | 0.05002 | 0.420210179  | 0.000752 |
| TSPAN8      | -0.386129946 | 0.146204 | -0.373530524 | 0.15975 | -0.895585994 | 0.000754 |
| MGMT        | -0.262972743 | 0.108645 | -0.214796217 | 0.18428 | -0.553217546 | 0.000767 |
| NDUFV1      | -0.100656364 | 0.216957 | -0.03029853  | 0.70749 | -0.272721231 | 0.000768 |
| ZNF207      | 0.087054276  | 0.254826 | 0.023118645  | 0.76185 | 0.255207926  | 0.000807 |
| DDX6        | 0.182959129  | 0.061188 | 0.009381604  | 0.92355 | 0.325674069  | 0.000827 |
| FAM21A      | 0.020832064  | 0.854622 | 0.175782978  | 0.11856 | 0.375652807  | 0.000832 |
| GALK1       | -0.189030757 | 0.299534 | -0.291929961 | 0.10695 | -0.619183862 | 0.000834 |
| FBXO38      | 0.141057526  | 0.306602 | 0.154926028  | 0.25996 | 0.458301784  | 0.000846 |
| XYLT2       | -0.131994017 | 0.318951 | -0.213525612 | 0.10554 | -0.442813932 | 0.000865 |
| ZFP41       | -0.293412416 | 0.371111 | -0.194058848 | 0.55244 | -1.123131545 | 0.000877 |
| COL18A1     | -0.276692425 | 0.281339 | -0.034568512 | 0.89272 | -0.855723219 | 0.000878 |
| ZBTB42      | -0.226993102 | 0.16913  | -0.196920066 | 0.22383 | -0.550608023 | 0.000891 |
| RPL13P12    | 0.141486435  | 0.430901 | -0.043358535 | 0.80926 | -0.598596165 | 0.000909 |
| NDEL1       | 0.146845795  | 0.155751 | 0.193845941  | 0.06054 | 0.3401959    | 0.000951 |
| PAIP1       | 0.039340873  | 0.686504 | 0.12949674   | 0.1817  | 0.319980504  | 0.000956 |
| RBM8A       | 0.026940395  | 0.791421 | 0.119660366  | 0.239   | 0.334906199  | 0.000955 |

|         |              |          |              |         |              |          |
|---------|--------------|----------|--------------|---------|--------------|----------|
| PROM2   | -0.531455302 | 0.1016   | -0.598743476 | 0.06422 | -1.069285712 | 0.000982 |
| EFNA4   | -0.174822087 | 0.284328 | -0.282662925 | 0.08216 | -0.541903417 | 0.000988 |
| GPC1    | -0.032926751 | 0.875588 | -0.068267183 | 0.74514 | -0.693954197 | 0.000998 |
| ACOT11  | -0.169106567 | 0.119565 | -0.163374522 | 0.13149 | -0.357484258 | 0.001011 |
| FGG     | 2.074520554  | 0.093653 | 1.050726927  | 0.39918 | 4.033222592  | 0.001013 |
| CRELD2  | -0.212245021 | 0.061728 | -0.004930342 | 0.96459 | -0.369687491 | 0.001037 |
| TSEN34  | -0.801801216 | 0.066999 | -0.738161507 | 0.0897  | -1.447812661 | 0.001045 |
| SQLE    | 0.016641922  | 0.878967 | 0.048637007  | 0.65612 | 0.357695051  | 0.001048 |
| UBA2    | 0.022733032  | 0.809243 | 0.084155873  | 0.37009 | 0.306485668  | 0.001081 |
| KLHL3   | -0.330084782 | 0.114176 | -0.290373086 | 0.1605  | -0.680751729 | 0.001099 |
| MAN2B2  | -0.017009597 | 0.890619 | 0.022163389  | 0.85701 | -0.403840289 | 0.001102 |
| PTAR1   | 0.057059767  | 0.55516  | 0.110589058  | 0.25107 | 0.313116548  | 0.001129 |
| ALKBH7  | -0.139566267 | 0.502601 | -0.190865856 | 0.3569  | -0.689468616 | 0.001147 |
| FBXO7   | 0.106792238  | 0.126338 | 0.134578282  | 0.05257 | 0.225012857  | 0.001144 |
| SUPT20H | 0.194984206  | 0.066818 | 0.153982515  | 0.1472  | 0.343413428  | 0.001173 |
| THEM6   | -0.359395401 | 0.13304  | -0.215842041 | 0.36331 | -0.775287231 | 0.001202 |
| YWHAG   | 0.122731015  | 0.113735 | 0.081600223  | 0.29235 | 0.250170833  | 0.001221 |
| GNPTG   | 0.053523231  | 0.645121 | 0.026550334  | 0.81771 | -0.37601576  | 0.001259 |
| EFTUD2  | -0.045140493 | 0.672633 | 0.208198056  | 0.05051 | 0.342028067  | 0.001301 |
| UNC93B1 | -0.381821478 | 0.172078 | -0.136589316 | 0.62382 | -0.904733475 | 0.001353 |
| FEM1B   | -0.038155285 | 0.65253  | 0.094596035  | 0.26202 | 0.269666252  | 0.001364 |
| KPNA2   | 0.09572548   | 0.50356  | 0.205799405  | 0.14991 | 0.456958227  | 0.001374 |
| CREM    | 0.076306424  | 0.557312 | 0.145382889  | 0.25731 | 0.404581674  | 0.00143  |
| SLC9B2  | 0.45758961   | 0.100194 | 0.488127085  | 0.07946 | 0.882045612  | 0.001442 |
| BEX4    | -0.048182311 | 0.686687 | 0.194421945  | 0.10034 | 0.37470144   | 0.001476 |
| USF1    | 0.183294055  | 0.074604 | 0.181689262  | 0.0747  | 0.322794285  | 0.00148  |
| NAPRT1  | -0.048759655 | 0.779153 | -0.318219082 | 0.06648 | -0.554318128 | 0.001502 |
| SORBS1  | 0.04063856   | 0.799212 | -0.246072341 | 0.12399 | -0.508099437 | 0.001507 |
| FAM120A | -0.133851502 | 0.177798 | -0.113056033 | 0.25388 | -0.31406579  | 0.00154  |
| SUPT7L  | 0.144317443  | 0.136922 | 0.069102423  | 0.47467 | 0.303018366  | 0.001576 |
| DHX15   | -0.112399517 | 0.107793 | 0.003265564  | 0.9626  | 0.219491006  | 0.001582 |
| PHF6    | 0.359911934  | 0.052096 | 0.258265541  | 0.16262 | 0.582773022  | 0.001603 |
| VPS37A  | 0.115353017  | 0.197521 | 0.064337928  | 0.46985 | 0.278770986  | 0.001628 |
| SGTB    | 0.267958352  | 0.101493 | 0.301021865  | 0.06456 | 0.506891765  | 0.001655 |
| SLC35A2 | -0.185343391 | 0.201676 | -0.12030489  | 0.40453 | -0.456249349 | 0.001675 |
| MPG     | -0.147269948 | 0.381001 | -0.103929119 | 0.5333  | -0.530338474 | 0.001688 |
| PHRF1   | 0.071716984  | 0.709178 | -0.167630076 | 0.38324 | -0.60624683  | 0.001735 |
| SRRT    | 0.286374345  | 0.152257 | -0.023133714 | 0.90834 | 0.621505018  | 0.001746 |
| WDR25   | -0.35082869  | 0.056013 | -0.180860295 | 0.31988 | -0.574246911 | 0.001762 |
| SMS     | 0.086498879  | 0.434026 | 0.100684297  | 0.36157 | 0.344191199  | 0.00177  |
| MACF1   | 0.227493126  | 0.057095 | 0.172746839  | 0.14844 | 0.373331707  | 0.001784 |
| SIM2    | -0.199212189 | 0.581321 | -0.450339134 | 0.21318 | -1.137940184 | 0.001851 |
| COX8A   | -0.230031467 | 0.127297 | -0.146200323 | 0.33097 | -0.468352943 | 0.001905 |
| FER1L4  | -0.539345848 | 0.10016  | -0.604280436 | 0.06469 | -1.018710015 | 0.001926 |
| ZNF524  | -0.10650114  | 0.631106 | -0.091053529 | 0.67636 | -0.695718922 | 0.001974 |
| TRIM65  | 0.003219851  | 0.984634 | -0.195609037 | 0.24047 | -0.517518596 | 0.002    |
| PLEKHA8 | 0.128878741  | 0.360598 | -0.006714661 | 0.96199 | 0.433124198  | 0.002004 |

|          |              |          |              |         |              |          |
|----------|--------------|----------|--------------|---------|--------------|----------|
| VN1R2    | 0.556856187  | 0.144265 | 0.634664603  | 0.08969 | 1.114602637  | 0.002026 |
| PKNOX1   | 0.212617505  | 0.146299 | 0.18655484   | 0.19951 | 0.446879199  | 0.002029 |
| SERP2    | -0.600734068 | 0.082265 | -0.28395631  | 0.39051 | -1.118671329 | 0.002048 |
| TRPM4    | -0.222072386 | 0.25184  | -0.337390263 | 0.08094 | -0.598967874 | 0.002046 |
| NDUFB7   | -0.010777355 | 0.923237 | -0.108190943 | 0.33184 | -0.346014695 | 0.00206  |
| CYBB     | -0.47280434  | 0.186502 | -0.662023572 | 0.06269 | -1.112713557 | 0.002077 |
| TWSG1    | -0.021132617 | 0.841402 | -0.066069769 | 0.5311  | 0.323161593  | 0.002128 |
| CEP95    | 0.07902685   | 0.589656 | 0.171345146  | 0.24095 | 0.4456964    | 0.002147 |
| PADI2    | 0.739746131  | 0.146258 | -0.40885569  | 0.42725 | -1.625016325 | 0.002169 |
| HNRNPC   | -0.032419795 | 0.735608 | 0.048201849  | 0.61539 | 0.29395018   | 0.002174 |
| LEPREL4  | -0.261226435 | 0.127824 | -0.292307706 | 0.08731 | -0.525121723 | 0.002181 |
| CGGBP1   | 0.130820443  | 0.166129 | 0.029762511  | 0.75208 | 0.287786895  | 0.002202 |
| CHDH     | -0.300758128 | 0.070786 | -0.171133623 | 0.30196 | -0.509860263 | 0.002203 |
| HFE      | -0.264823822 | 0.239915 | 0.018815073  | 0.93278 | -0.69319069  | 0.002206 |
| HNRNPH2  | -0.048763524 | 0.534043 | 0.09889854   | 0.20404 | 0.237374788  | 0.002222 |
| RBM48    | -0.22764224  | 0.152118 | -0.186538254 | 0.23515 | -0.487484201 | 0.00222  |
| SLC6A10P | -0.40205163  | 0.434442 | 0.061350097  | 0.90291 | -1.723248791 | 0.002218 |
| SOS2     | 0.145809261  | 0.140326 | 0.170771014  | 0.0828  | 0.300279842  | 0.002217 |
| ASPHD1   | -0.209171312 | 0.436673 | -0.193135541 | 0.46695 | -0.854756544 | 0.002253 |
| OTUD4    | 0.159382412  | 0.172067 | 0.059303325  | 0.61052 | 0.354588681  | 0.002263 |
| DPM3     | -0.384931374 | 0.057321 | -0.349483393 | 0.08021 | -0.61726679  | 0.002272 |
| UBR5     | 0.2292806    | 0.139644 | 0.204304675  | 0.18775 | 0.473014339  | 0.002285 |
| MASP2    | 0.296876561  | 0.166101 | 0.238465812  | 0.26179 | 0.628001907  | 0.002296 |
| ZNF776   | 0.088781819  | 0.375367 | 0.102394113  | 0.30172 | 0.300565693  | 0.002312 |
| TDG      | 0.051043812  | 0.582994 | -0.002724846 | 0.97649 | 0.279233     | 0.002347 |
| FKBP11   | -0.237908844 | 0.241648 | 0.300492583  | 0.13604 | -0.617737749 | 0.002353 |
| NENF     | -0.174418392 | 0.10941  | -0.139660021 | 0.1949  | -0.329535209 | 0.002394 |
| SUB1     | -0.018920624 | 0.82823  | 0.076844507  | 0.37695 | 0.263692186  | 0.002392 |
| SEPN1    | 0.092132794  | 0.553935 | -0.246522559 | 0.11402 | -0.475091137 | 0.002401 |
| TAF6     | 0.046580697  | 0.673965 | -0.190870629 | 0.08653 | -0.33796054  | 0.00243  |
| CHPF     | 0.247651806  | 0.179813 | -0.224332984 | 0.22551 | -0.563084688 | 0.002432 |
| CDHR3    | -0.237506153 | 0.474374 | -0.57310613  | 0.08531 | -1.022794031 | 0.00244  |
| MOGAT2   | -0.933177365 | 0.159856 | -0.454856334 | 0.46718 | -2.154133665 | 0.002446 |
| SRSF11   | 0.165420827  | 0.083758 | 0.051581466  | 0.58926 | 0.288662859  | 0.002463 |
| ZNF35    | 0.238399795  | 0.134805 | 0.22327316   | 0.15788 | 0.466843082  | 0.002464 |
| CD7      | 0.863534524  | 0.222947 | 1.144316988  | 0.10583 | 2.102285489  | 0.002473 |
| OSBPL11  | -0.0417057   | 0.601825 | 0.044543759  | 0.56979 | 0.233133747  | 0.002491 |
| ALDH1A2  | 0.731482785  | 0.154702 | 0.164074791  | 0.74966 | 1.551206607  | 0.002519 |
| PPDPF    | 0.209226936  | 0.370042 | -0.066340963 | 0.77657 | -0.714235599 | 0.002517 |
| NET1     | -0.243063667 | 0.064048 | -0.075475354 | 0.56471 | -0.396263776 | 0.002524 |
| S100A1   | 0.726058681  | 0.104859 | 0.567962106  | 0.19869 | 1.306990311  | 0.002547 |
| SLC25A11 | -0.202491739 | 0.090027 | 0.000580437  | 0.99609 | -0.359422427 | 0.002563 |
| FRY      | -0.405247178 | 0.138642 | -0.157103717 | 0.56539 | -0.825573452 | 0.002573 |
| MAPRE1   | 0.125164305  | 0.235451 | 0.123648713  | 0.24001 | 0.316341899  | 0.002575 |
| ATF2     | 0.14706762   | 0.209995 | 0.153000969  | 0.1912  | 0.351429927  | 0.002612 |
| FGGY     | -0.356174798 | 0.189788 | -0.333811233 | 0.21176 | -0.815425097 | 0.002653 |
| CPT1A    | -0.248566146 | 0.351003 | 0.301982444  | 0.25385 | -0.801466764 | 0.002784 |

|              |              |          |              |         |              |          |
|--------------|--------------|----------|--------------|---------|--------------|----------|
| DDX41        | 0.15438673   | 0.135871 | 0.040956829  | 0.69161 | 0.307767672  | 0.002788 |
| EPN1         | 0.203284709  | 0.209333 | -0.233122258 | 0.15022 | -0.485166279 | 0.002813 |
| TMEM192      | -0.228435515 | 0.088253 | -0.19433436  | 0.14385 | -0.39873539  | 0.002812 |
| ADAM15       | -0.223916528 | 0.288876 | -0.242170352 | 0.24931 | -0.6289192   | 0.002895 |
| CSF3R        | 0.583035859  | 0.068363 | 0.127632137  | 0.69064 | 0.944692906  | 0.002899 |
| GCNT4        | 0.160478066  | 0.463326 | 0.30637347   | 0.15998 | 0.646952171  | 0.002913 |
| SRP19        | -0.035616444 | 0.780819 | 0.1621639    | 0.19964 | 0.374809973  | 0.002931 |
| CAMSAP2      | 0.114218312  | 0.158105 | 0.089611059  | 0.26586 | 0.238608208  | 0.002937 |
| CYP2J2       | -0.367530934 | 0.202092 | 0.318385761  | 0.25924 | -0.87343312  | 0.002998 |
| MAGED1       | -0.09439861  | 0.421835 | -0.194558964 | 0.09771 | -0.348640035 | 0.003011 |
| PPP1R12A     | 0.125244261  | 0.405197 | 0.012660259  | 0.93292 | 0.445271795  | 0.003045 |
| DNAH10       | 0.624224778  | 0.147452 | 0.721120411  | 0.09582 | 1.263995503  | 0.003111 |
| D-2583A14.   | 0.15539717   | 0.566676 | 0.389863715  | 0.14259 | 0.769610145  | 0.003127 |
| RAB8B        | 0.094719708  | 0.562712 | 0.212816421  | 0.19313 | 0.482504205  | 0.003131 |
| B3GNT3       | -0.303235415 | 0.089313 | -0.314489646 | 0.07778 | -0.526860852 | 0.003154 |
| KIAA0232     | 0.083488231  | 0.425659 | 0.143467735  | 0.16943 | 0.30767617   | 0.003149 |
| PPAP2B       | 0.28307086   | 0.138734 | 0.236225293  | 0.21631 | 0.561643881  | 0.003216 |
| SAMD8        | 0.153267911  | 0.174012 | 0.150719002  | 0.17889 | 0.329379743  | 0.003223 |
| DAZAP1       | 0.210726481  | 0.075764 | 0.22540984   | 0.05674 | 0.347740109  | 0.003257 |
| C19orf60     | -0.234109412 | 0.25536  | -0.24879982  | 0.22783 | -0.608733105 | 0.003264 |
| ANO3         | 0.764795048  | 0.222025 | 0.680865826  | 0.27673 | 1.826635946  | 0.003286 |
| GPR64        | 0.060286272  | 0.877807 | -0.534139501 | 0.17446 | -1.165111676 | 0.003289 |
| COLCA2       | -0.243172053 | 0.523157 | -0.089770804 | 0.81243 | -1.140377664 | 0.003313 |
| PPP6R3       | -0.073549687 | 0.348651 | -0.00970139  | 0.90128 | 0.229196917  | 0.003314 |
| RRP36        | 0.013458065  | 0.886809 | 0.132156254  | 0.15677 | 0.271920287  | 0.003332 |
| FAM83E       | -0.33961053  | 0.100202 | -0.116257077 | 0.5713  | -0.606649633 | 0.003342 |
| SMG9         | -0.199008774 | 0.072997 | -0.113459942 | 0.30304 | -0.323295195 | 0.003342 |
| NRCAM        | 0.29056746   | 0.516036 | 0.645770044  | 0.14741 | 1.300538962  | 0.003383 |
| KCND2        | 0.396003817  | 0.409351 | 0.208626174  | 0.66803 | 1.376283147  | 0.003433 |
| SMURF1       | 0.071765124  | 0.480448 | 0.112309514  | 0.26753 | 0.295881132  | 0.003435 |
| SCARA5       | -0.937961216 | 0.143315 | -1.035459944 | 0.10837 | -1.977918447 | 0.003454 |
| FOXJ1        | -0.524439585 | 0.257718 | -0.313637547 | 0.49164 | -1.401406624 | 0.003503 |
| SLTM         | 0.089570857  | 0.335605 | 0.179515766  | 0.05311 | 0.270401409  | 0.003495 |
| SPIN1        | 0.090697259  | 0.409681 | 0.169200699  | 0.12325 | 0.319936561  | 0.003507 |
| TBX15        | 0.187023889  | 0.394665 | 0.102321941  | 0.64054 | -0.654178733 | 0.003515 |
| HAS3         | -0.873862487 | 0.087279 | -0.905290362 | 0.07618 | -1.492833536 | 0.003601 |
| HDAC11       | -0.003505747 | 0.98604  | -0.381368441 | 0.05561 | -0.587363706 | 0.003603 |
| ZNF414       | 0.295888173  | 0.348632 | -0.606356112 | 0.0581  | -0.943511661 | 0.003602 |
| PTDSS2       | 0.192100734  | 0.191646 | -0.173453875 | 0.23782 | -0.428662777 | 0.00364  |
| PT11-1280N14 | 0.659664243  | 0.519456 | -0.647258297 | 0.5304  | -3.179523895 | 0.003661 |
| SEZ6L2       | 0.154807187  | 0.725507 | 0.27588262   | 0.53114 | -1.286253691 | 0.003683 |
| SPINT2       | -0.278771319 | 0.059371 | -0.230897263 | 0.11817 | -0.428264668 | 0.003762 |
| YAP1         | 0.158032066  | 0.05684  | 0.09222663   | 0.26542 | 0.23949514   | 0.003793 |
| LAYN         | 0.558501455  | 0.052786 | 0.535486886  | 0.06244 | 0.82010908   | 0.00383  |
| PPM1B        | -0.006392177 | 0.951736 | 0.029965856  | 0.7754  | 0.302472209  | 0.00385  |
| TRMT2A       | -0.149472931 | 0.250533 | -0.109426842 | 0.39324 | -0.373645287 | 0.003857 |
| COL9A1       | 0.249837118  | 0.412028 | -0.524774104 | 0.08595 | 0.876422881  | 0.003877 |

|              |              |          |              |         |              |          |
|--------------|--------------|----------|--------------|---------|--------------|----------|
| OSBPL10      | -0.209469076 | 0.238967 | -0.243456122 | 0.16972 | -0.51324114  | 0.003892 |
| SNCA         | 0.470904401  | 0.067094 | 0.119742894  | 0.64262 | 0.737518917  | 0.003892 |
| RAB40B       | -0.061470236 | 0.794033 | -0.108105337 | 0.64511 | -0.679117236 | 0.003911 |
| SLC4A7       | -0.038096245 | 0.774278 | 0.072997446  | 0.58163 | 0.381493551  | 0.003914 |
| GRM7         | -0.684200169 | 0.175367 | -0.131269714 | 0.786   | -1.469925192 | 0.003947 |
| ARRB2        | -0.236835394 | 0.215803 | -0.363825421 | 0.05555 | -0.54951228  | 0.004037 |
| MORF4L1      | 0.037900616  | 0.62268  | 0.034946312  | 0.64947 | 0.220693239  | 0.004062 |
| GJA1         | 0.455354944  | 0.06783  | 0.478828694  | 0.05477 | 0.715583209  | 0.004091 |
| LANCL3       | -0.584643661 | 0.116668 | 0.169545252  | 0.64335 | -1.07590973  | 0.004159 |
| GTF3C5       | 0.012425178  | 0.909489 | 0.177840147  | 0.10037 | 0.30930497   | 0.004179 |
| UFD1L        | 0.151380944  | 0.128432 | 0.140659304  | 0.1557  | 0.282146297  | 0.00426  |
| CA9          | -0.618892824 | 0.096931 | -0.699642115 | 0.06053 | -1.065123115 | 0.004283 |
| ENPP5        | -0.446734696 | 0.087199 | -0.069705401 | 0.78563 | -0.746573853 | 0.004294 |
| ZFR          | 0.130725837  | 0.316446 | 0.05827636   | 0.65499 | 0.371859727  | 0.004302 |
| CCAR1        | 0.185059223  | 0.15157  | 0.150476103  | 0.24324 | 0.367358921  | 0.004328 |
| CLDND1       | 0.069809282  | 0.435161 | 0.001525052  | 0.98635 | 0.252608257  | 0.004333 |
| ZFHX3        | -0.121601371 | 0.664315 | -0.317055048 | 0.25814 | -0.800178642 | 0.004352 |
| PTP11-39K24. | 1.067190116  | 0.072759 | 0.827880055  | 0.16607 | 1.620375391  | 0.004375 |
| PTPN21       | 0.273832698  | 0.111213 | 0.329679041  | 0.05474 | 0.487374908  | 0.004389 |
| POLR2I       | -0.083301943 | 0.48998  | -0.13762602  | 0.24829 | -0.341516149 | 0.004401 |
| SMAD9        | 0.332159504  | 0.072787 | -0.104680038 | 0.57283 | 0.52455673   | 0.004468 |
| KIAA1199     | -0.671380272 | 0.205761 | -0.594279763 | 0.26263 | -1.509427773 | 0.004485 |
| ITPR2        | -0.274615635 | 0.217507 | -0.078488218 | 0.72411 | -0.631826658 | 0.004523 |
| SLC1A5       | -0.149667575 | 0.330473 | -0.143832903 | 0.34887 | -0.43711671  | 0.004526 |
| SMN2         | 0.50378155   | 0.058155 | 0.20916128   | 0.43126 | 0.751253615  | 0.004532 |
| DNAJC7       | 0.033016518  | 0.74312  | 0.09431366   | 0.34649 | 0.283042225  | 0.004564 |
| SLC39A6      | 0.300285336  | 0.091522 | -0.045151932 | 0.79977 | 0.503617213  | 0.004582 |
| DEGS2        | -0.10649396  | 0.777101 | -0.353075301 | 0.34687 | -1.069134329 | 0.004628 |
| CMTM7        | -0.275831167 | 0.104376 | -0.233902065 | 0.16585 | -0.478242475 | 0.004709 |
| TMEM52B      | 0.531624588  | 0.08354  | 0.204289129  | 0.50688 | 0.862135566  | 0.004709 |
| TMEM161B     | -0.128655189 | 0.24387  | -0.068446063 | 0.53216 | -0.309276589 | 0.004721 |
| EIF3J        | 0.188076203  | 0.115202 | 0.108724241  | 0.36073 | 0.335115467  | 0.004742 |
| PLA2G4F      | -0.636715621 | 0.089111 | -0.63051426  | 0.08604 | -1.076535846 | 0.004737 |
| PWWP2B       | -0.155399089 | 0.491129 | -0.359243989 | 0.11175 | -0.643788916 | 0.004751 |
| EIF5         | 0.059067152  | 0.716308 | 0.284346093  | 0.08005 | 0.458128833  | 0.004791 |
| ROMO1        | -0.124168804 | 0.312714 | 0.024196579  | 0.83941 | -0.344171685 | 0.004815 |
| AMMECR1L     | 0.038915618  | 0.604392 | 0.08327978   | 0.26064 | 0.206404824  | 0.004829 |
| CD151        | -0.195836521 | 0.051184 | -0.019781135 | 0.84305 | -0.282396668 | 0.004826 |
| SLC2A1       | 0.079564744  | 0.776423 | -0.092069279 | 0.74242 | -0.790037251 | 0.00483  |
| TMEM184A     | -0.121968601 | 0.508885 | -0.16833399  | 0.35961 | -0.520423505 | 0.004852 |
| ABHD16A      | 0.162604066  | 0.13035  | 0.034302753  | 0.74773 | 0.297999171  | 0.004895 |
| MICALL2      | -0.275127498 | 0.232336 | -0.136979324 | 0.55085 | -0.648701995 | 0.004959 |
| TBK1         | 0.141323144  | 0.186984 | 0.165548744  | 0.11908 | 0.296271555  | 0.004969 |
| RCC6-PGBE    | 0.175638449  | 0.349127 | 0.177291811  | 0.33856 | 0.507889741  | 0.004982 |
| FSTL5        | 0.360330602  | 0.302969 | 0.152174954  | 0.66383 | 0.975462475  | 0.005008 |
| NUPL1        | 0.112784521  | 0.165345 | -0.024644981 | 0.76124 | 0.226689087  | 0.00505  |
| ANKRD39      | -0.239670738 | 0.170926 | -0.222863354 | 0.19645 | -0.486231409 | 0.005057 |



|            |              |          |              |         |              |          |
|------------|--------------|----------|--------------|---------|--------------|----------|
| TUBA1B     | 0.228508243  | 0.119728 | 0.163644933  | 0.26513 | 0.411436244  | 0.005078 |
| CACHD1     | -0.379470871 | 0.09686  | -0.253340053 | 0.26652 | -0.639879317 | 0.005124 |
| TECTA      | 0.476131021  | 0.363194 | 0.178444779  | 0.73523 | 1.437395151  | 0.005136 |
| CCDC68     | 0.117066386  | 0.478708 | -0.2445015   | 0.13936 | 0.459763238  | 0.005143 |
| EXO5       | -0.186804954 | 0.29557  | 0.193537358  | 0.26983 | 0.483738377  | 0.005158 |
| B9D1       | -0.295830042 | 0.085379 | -0.096982263 | 0.56369 | -0.481378864 | 0.005175 |
| CNPPD1     | 0.071827354  | 0.547663 | -0.219560985 | 0.06742 | -0.336575112 | 0.005195 |
| P11-343C2. | -0.130019677 | 0.387986 | 0.144182585  | 0.32901 | 0.408420932  | 0.005193 |
| NCLN       | -0.073272765 | 0.549285 | -0.070769792 | 0.56297 | -0.342629218 | 0.005328 |
| RPLP1      | -0.012891129 | 0.932313 | 0.041988844  | 0.78189 | -0.422829153 | 0.00534  |
| EGFL6      | -2.036834726 | 0.113832 | -1.394511289 | 0.2767  | -3.692502036 | 0.005377 |
| PQBP1      | 0.188158322  | 0.08502  | 0.143558392  | 0.18538 | 0.299847562  | 0.005367 |
| YAF2       | 0.170976133  | 0.321309 | 0.12370766   | 0.47063 | 0.47392969   | 0.005408 |
| TLK2       | 0.16938109   | 0.097209 | 0.173076336  | 0.08849 | 0.281683622  | 0.005444 |
| HOXC5      | -0.568416092 | 0.186142 | -0.346722345 | 0.40938 | -1.230773583 | 0.005491 |
| AGPAT1     | 0.105764114  | 0.394548 | -0.194811243 | 0.11726 | -0.345257314 | 0.005558 |
| PCDHB5     | 0.201275613  | 0.517006 | 0.239654691  | 0.43911 | 0.8527744    | 0.005604 |
| RABEP1     | -0.06558902  | 0.488671 | 0.041225565  | 0.6617  | 0.25986959   | 0.00563  |
| SSTR1      | -0.320903933 | 0.316865 | -0.014497975 | 0.96333 | -0.899816171 | 0.005685 |
| TRIM5      | 0.117825914  | 0.304702 | -0.074697024 | 0.51496 | 0.314881217  | 0.005715 |
| TTC21B     | 0.033359956  | 0.813909 | 0.025304151  | 0.85766 | 0.388010354  | 0.005817 |
| CREG2      | -0.016409106 | 0.949648 | -0.0621074   | 0.8075  | -0.732036337 | 0.005898 |
| FEZ2       | 0.002788918  | 0.980021 | 0.042212325  | 0.70322 | 0.303756385  | 0.005893 |
| PDE3A      | 0.214899433  | 0.234678 | 0.156177959  | 0.3873  | 0.495664757  | 0.005955 |
| SLC2A4RG   | -0.131269627 | 0.491988 | -0.149333662 | 0.43339 | -0.528878515 | 0.005972 |
| PGAP2      | -0.11555422  | 0.485871 | -0.277009274 | 0.09237 | -0.456205972 | 0.006008 |
| XRN2       | -0.01885664  | 0.781079 | 0.033868985  | 0.6158  | 0.184560219  | 0.006051 |
| TBX3       | 0.991159193  | 0.053118 | 0.625628344  | 0.22209 | 1.403561707  | 0.006085 |
| RASSF2     | -0.313664268 | 0.133597 | -0.243231443 | 0.23883 | -0.573659216 | 0.006141 |
| SEC16B     | -0.558730065 | 0.084451 | 0.138081795  | 0.65909 | -0.895331506 | 0.006186 |
| BAHD1      | -0.068374796 | 0.589954 | 0.073896774  | 0.55659 | -0.347606658 | 0.006236 |
| SPTLC3     | -0.35972856  | 0.174909 | -0.403827793 | 0.12682 | -0.724870089 | 0.006237 |
| CERS4      | 0.123367523  | 0.573167 | -0.238166176 | 0.27575 | -0.606243392 | 0.006257 |
| DNAJB4     | 0.148984019  | 0.444312 | 0.239614886  | 0.21529 | 0.525870755  | 0.00626  |
| CADPS      | 0.877714196  | 0.052516 | 0.237702102  | 0.60062 | 1.233286171  | 0.006311 |
| ATP2A3     | -0.10292517  | 0.695537 | -0.140058275 | 0.59425 | -0.723765851 | 0.006325 |
| MSX2       | -0.15828632  | 0.604146 | -0.546131425 | 0.07434 | -0.850983914 | 0.00634  |
| AMDHD1     | 0.540467677  | 0.262439 | -0.183098913 | 0.70695 | -1.384589379 | 0.006391 |
| UBE2L3     | 0.081554259  | 0.381861 | 0.112255242  | 0.22738 | 0.252833637  | 0.006436 |
| HERPUD1    | -0.381457172 | 0.188421 | -0.508235958 | 0.07944 | -0.789491043 | 0.006486 |
| TXNRD1     | 0.148781156  | 0.302234 | 0.07045084   | 0.62506 | 0.391293944  | 0.006537 |
| ECD        | 0.013775705  | 0.900336 | 0.03674336   | 0.73596 | 0.295159526  | 0.006581 |
| EBLN2      | 0.120906877  | 0.537325 | 0.197103157  | 0.30576 | 0.510800283  | 0.0066   |
| FAM76B     | -0.056166312 | 0.698452 | 0.046311579  | 0.74664 | 0.387112815  | 0.006597 |
| SLC17A5    | -0.275781065 | 0.051822 | -0.109665649 | 0.43684 | -0.384139341 | 0.006652 |
| FSD1L      | 0.096815383  | 0.564369 | 0.275687169  | 0.09401 | 0.443255269  | 0.006677 |
| F12        | -0.053759672 | 0.899987 | -0.77689194  | 0.07224 | -1.217054803 | 0.006702 |

|              |              |          |              |         |              |          |
|--------------|--------------|----------|--------------|---------|--------------|----------|
| RP11-15J10.1 | -0.531239729 | 0.100915 | -0.156570809 | 0.61849 | -0.880870593 | 0.006711 |
| FMOD         | -0.572878256 | 0.190423 | -0.239846823 | 0.58272 | -1.188460025 | 0.006734 |
| RBMXL1       | 0.114177743  | 0.28005  | 0.062079457  | 0.55519 | 0.282974499  | 0.006748 |
| GNAL         | 0.208431417  | 0.443773 | 0.107387467  | 0.69281 | 0.73127765   | 0.006769 |
| TIAM1        | 0.357060832  | 0.283894 | 0.609209471  | 0.06701 | 0.898789142  | 0.006802 |
| ANXA4        | 0.431541968  | 0.097022 | 0.285519839  | 0.27216 | 0.703225411  | 0.006824 |
| PCDH20       | -0.2552915   | 0.275453 | 0.022368737  | 0.92329 | -0.634912484 | 0.006837 |
| DGCR6L       | -0.226720237 | 0.212124 | -0.183085041 | 0.30924 | -0.490773169 | 0.006889 |
| NUCB1        | -0.031400601 | 0.803781 | -0.063213065 | 0.61662 | -0.341690371 | 0.006885 |
| PUSL1        | 0.002670704  | 0.988984 | -0.156983571 | 0.41791 | -0.530446386 | 0.006887 |
| RGS16        | 0.484170823  | 0.171304 | 0.052970146  | 0.88153 | 0.947353212  | 0.006911 |
| CD81         | -0.107932663 | 0.448786 | -0.251291052 | 0.07773 | -0.38487396  | 0.006955 |
| FGB          | 0.681046322  | 0.369944 | -0.054214939 | 0.94312 | 2.044559563  | 0.007078 |
| DDOST        | -0.186385528 | 0.098314 | -0.123864042 | 0.27146 | -0.302958542 | 0.007179 |
| LRRFIP2      | 0.140958241  | 0.185364 | 0.116797835  | 0.2705  | 0.283498979  | 0.007172 |
| PDZD2        | 0.395513267  | 0.085299 | 0.167682649  | 0.4676  | 0.617730483  | 0.007174 |
| CUL3         | -0.063551681 | 0.483821 | 0.106704083  | 0.23612 | 0.241266661  | 0.007203 |
| EIF4EBP1     | -0.298318382 | 0.08511  | -0.120498976 | 0.4829  | -0.464748504 | 0.00725  |
| RIMS4        | 0.670694339  | 0.394751 | 0.491674717  | 0.53021 | -2.650995763 | 0.007283 |
| HMGCS1       | 0.19498833   | 0.299264 | -0.047290142 | 0.80124 | 0.503801157  | 0.007304 |
| RITA1        | -0.07487618  | 0.590386 | -0.023806046 | 0.86188 | -0.374457794 | 0.007305 |
| UBTD2        | 0.092945225  | 0.299556 | 0.114014027  | 0.20052 | 0.237902575  | 0.007296 |
| 7-Mar        | -0.048418233 | 0.579758 | 0.076174566  | 0.3817  | 0.233004008  | 0.007318 |
| PLEKHG1      | -0.367972709 | 0.086546 | -0.13979389  | 0.51299 | -0.574714686 | 0.007348 |
| SMC5         | -0.083296281 | 0.355843 | -0.036679584 | 0.68319 | 0.239879028  | 0.007392 |
| KLF4         | -0.182582403 | 0.545231 | -0.307174888 | 0.30875 | -0.808908646 | 0.007482 |
| TIMM13       | -0.129430663 | 0.372635 | -0.220971477 | 0.1263  | -0.387695921 | 0.007483 |
| GBA2         | 0.218954338  | 0.057454 | 0.106495753  | 0.35497 | 0.306778552  | 0.00751  |
| KDELR2       | -0.064620185 | 0.485808 | -0.037661865 | 0.68399 | -0.247108544 | 0.007613 |
| SYT1         | -0.32086002  | 0.354602 | 0.321767093  | 0.34946 | -0.926367702 | 0.007609 |
| SYTL1        | -0.424509429 | 0.096127 | -0.412064605 | 0.10552 | -0.682119861 | 0.0076   |
| C2ORF15      | -0.42487373  | 0.061593 | -0.278975028 | 0.2144  | -0.604780062 | 0.007635 |
| NUFIP2       | 0.194664599  | 0.192426 | 0.145320413  | 0.33028 | 0.397253159  | 0.007764 |
| VPS13D       | 0.497819117  | 0.246621 | 0.550497169  | 0.19952 | 1.141085614  | 0.007781 |
| ABCC3        | -0.15086288  | 0.485522 | -0.233900223 | 0.27943 | -0.576268026 | 0.007805 |
| KIF1B        | 0.239535746  | 0.063989 | 0.124376011  | 0.33585 | 0.343377367  | 0.007806 |
| POLR2B       | -0.079906558 | 0.336077 | 0.066371895  | 0.42253 | 0.219821236  | 0.007805 |
| SOGA2        | 0.277378002  | 0.170486 | -0.210973674 | 0.29919 | 0.537384913  | 0.0078   |
| CLDN6        | 0.178781425  | 0.391864 | -0.129646981 | 0.53489 | 0.553199924  | 0.007876 |
| IGSF1        | -0.326383985 | 0.286858 | 0.029409613  | 0.92336 | -0.814646097 | 0.007917 |
| PUS1         | -0.238689288 | 0.197159 | -0.21010974  | 0.25319 | -0.490520361 | 0.007974 |
| SYNPO2L      | 0.22981495   | 0.516114 | -0.636684039 | 0.08497 | -1.007847698 | 0.008057 |
| FOXA3        | -0.327004072 | 0.141798 | -0.407716582 | 0.06663 | -0.590157749 | 0.008081 |
| SLC22A15     | -0.521224366 | 0.187892 | -0.3923319   | 0.3094  | -1.048693316 | 0.008079 |
| CCDC51       | -0.271439927 | 0.052744 | -0.147340911 | 0.28093 | -0.364848486 | 0.008278 |
| H3F3B        | 0.162166792  | 0.111589 | 0.131188554  | 0.19745 | 0.268536898  | 0.0083   |
| EPHX3        | -0.269750669 | 0.2935   | -0.24166287  | 0.33953 | -0.689315644 | 0.008319 |

|            |              |          |              |         |              |          |
|------------|--------------|----------|--------------|---------|--------------|----------|
| MFSD10     | 0.0268937    | 0.881843 | -0.078542455 | 0.6635  | -0.479716807 | 0.008319 |
| RPS6KA6    | 0.036632468  | 0.860094 | 0.277927164  | 0.17397 | 0.535384651  | 0.008315 |
| PELI2      | 0.134676749  | 0.500382 | -0.132199472 | 0.50833 | 0.525129343  | 0.008327 |
| ADAMTS20   | 0.672081091  | 0.059289 | 0.532762181  | 0.13557 | 0.927129553  | 0.008334 |
| HEXA       | -0.106523437 | 0.306351 | -0.030792014 | 0.76651 | -0.274133827 | 0.008353 |
| RBM4       | 0.086879825  | 0.297649 | 0.005499639  | 0.94728 | 0.218334944  | 0.008381 |
| CYB5D2     | -0.299392056 | 0.096206 | -0.034455719 | 0.84491 | -0.469444794 | 0.008433 |
| STAG3      | 0.461157697  | 0.051165 | 0.058688941  | 0.80518 | 0.613966182  | 0.008484 |
| TBC1D12    | -0.05345574  | 0.744778 | 0.203295662  | 0.21295 | 0.427641857  | 0.008614 |
| C20orf194  | 0.187714864  | 0.096318 | 0.191517425  | 0.08691 | 0.291788084  | 0.008627 |
| FBXO2      | -0.285145096 | 0.24853  | -0.336411102 | 0.17228 | -0.650117708 | 0.008669 |
| SLC25A1    | -0.023373704 | 0.871377 | -0.127202827 | 0.37777 | -0.379268031 | 0.008673 |
| NCOA3      | 0.141142022  | 0.121983 | 0.074833439  | 0.41129 | 0.238337289  | 0.0087   |
| HSD3B7     | -0.148224622 | 0.448852 | -0.030549873 | 0.87283 | -0.516975796 | 0.008709 |
| SDPR       | 0.712301012  | 0.061495 | -0.242761765 | 0.52539 | 0.997548557  | 0.008721 |
| TARS       | 0.059875237  | 0.647656 | 0.158185861  | 0.22681 | 0.342975036  | 0.008721 |
| RBM7       | 0.153179762  | 0.227526 | 0.223685519  | 0.07694 | 0.330524267  | 0.008739 |
| VLDLR      | -0.228395275 | 0.383678 | -0.124070062 | 0.6354  | -0.687745452 | 0.008736 |
| PLCXD3     | 0.124076434  | 0.7281   | 0.143789072  | 0.68361 | -1.003141226 | 0.008798 |
| MSLN       | -0.423336134 | 0.331657 | -0.238785075 | 0.58213 | -1.181278002 | 0.008826 |
| TNFRSF10C  | -0.454792242 | 0.143951 | -0.53877254  | 0.08383 | -0.816149741 | 0.008837 |
| KRT19P1    | -0.282772016 | 0.183774 | -0.079184298 | 0.70418 | -0.557839836 | 0.008888 |
| CKLF       | -0.298803385 | 0.1142   | 0.132023734  | 0.46627 | -0.487203614 | 0.009015 |
| GPR87      | -0.531269665 | 0.216487 | -0.36659548  | 0.38683 | -1.143970901 | 0.009066 |
| CLIC3      | 0.221294558  | 0.626743 | -0.143568206 | 0.75563 | -1.331412409 | 0.009097 |
| QKI        | 0.258066876  | 0.053511 | 0.151509549  | 0.25671 | 0.347935842  | 0.00912  |
| BCR        | -0.192271674 | 0.199204 | -0.088412301 | 0.55419 | -0.390571582 | 0.009142 |
| ZNF488     | -0.29753386  | 0.347395 | -0.479717351 | 0.12968 | -0.833786965 | 0.009162 |
| ENAH       | -0.127906893 | 0.337967 | -0.001879442 | 0.98876 | 0.347115399  | 0.009192 |
| TRABD      | -0.092162435 | 0.534736 | -0.082285025 | 0.57725 | -0.388445912 | 0.009249 |
| PSMD7      | -0.026741255 | 0.760065 | 0.083952454  | 0.33446 | 0.225497982  | 0.009282 |
| AC093724.2 | -0.389040288 | 0.178943 | -0.443278423 | 0.12106 | -0.76460987  | 0.009354 |
| PANX1      | 0.107571893  | 0.351187 | 0.201575627  | 0.07796 | 0.296018653  | 0.009343 |
| JMJD6      | 0.251347063  | 0.077543 | 0.270672508  | 0.05699 | 0.367286306  | 0.009365 |
| DCUN1D1    | -0.032861466 | 0.800633 | 0.235957743  | 0.06883 | 0.335864898  | 0.009489 |
| DISC1      | -0.108498617 | 0.678097 | -0.344212586 | 0.18848 | -0.684085087 | 0.009501 |
| BDH1       | -0.371478279 | 0.125695 | -0.329875825 | 0.17279 | -0.63155374  | 0.00956  |
| TCP1       | -0.063383798 | 0.487823 | 0.127179051  | 0.16274 | 0.235797808  | 0.009593 |
| FBXO30     | 0.10955212   | 0.324953 | 0.19812385   | 0.07195 | 0.283405817  | 0.009691 |
| DNAJB6     | 0.044928087  | 0.657719 | 0.159350513  | 0.1147  | 0.26087398   | 0.009713 |
| AC026703.1 | 0.378999855  | 0.23387  | -0.31230502  | 0.32697 | 0.821532998  | 0.009817 |
| MBD4       | 0.05896424   | 0.633886 | 0.172406831  | 0.15863 | 0.315208496  | 0.009813 |
| HNRNPK     | 0.098000446  | 0.152733 | 0.066969269  | 0.32805 | 0.176614474  | 0.009862 |
| SLMAP      | 0.049368578  | 0.697306 | 0.242237759  | 0.05588 | 0.326733607  | 0.009863 |
| RABGAP1L   | -0.15228511  | 0.243594 | -0.090412572 | 0.48764 | -0.336124751 | 0.009948 |
| RIN1       | -0.234948261 | 0.457794 | -0.196372804 | 0.53348 | -0.826087227 | 0.00995  |
| CHD1       | 0.021426949  | 0.847038 | 0.167191675  | 0.13144 | 0.285135093  | 0.009973 |

|             |               |          |              |         |              |          |
|-------------|---------------|----------|--------------|---------|--------------|----------|
| CCT5        | -0.003995424  | 0.971671 | 0.182545203  | 0.10413 | 0.289107365  | 0.010006 |
| CHKB        | 0.109891263   | 0.415845 | 0.252160864  | 0.06022 | 0.343924585  | 0.009991 |
| IQCK        | -0.204865847  | 0.210681 | -0.037943754 | 0.8131  | -0.411777491 | 0.01     |
| C12orf10    | -0.0711117432 | 0.519234 | 0.006673831  | 0.95094 | -0.282764463 | 0.010033 |
| PNPO        | -0.16293865   | 0.411323 | -0.239226859 | 0.22661 | -0.514825776 | 0.010028 |
| ADCY7       | -0.01176829   | 0.93898  | -0.087599642 | 0.56346 | -0.392800786 | 0.010049 |
| CD164       | 0.023631341   | 0.831855 | -0.169417224 | 0.12784 | -0.28616045  | 0.010125 |
| REM2        | -0.017804833  | 0.967503 | 0.299922431  | 0.47519 | 1.038924334  | 0.010125 |
| SPNS1       | -0.007637508  | 0.949995 | 0.050449335  | 0.67641 | -0.314509262 | 0.010179 |
| EVA1B       | 0.495504892   | 0.057696 | 0.183045944  | 0.48467 | -0.693877098 | 0.010217 |
| PGLS        | 0.025039839   | 0.831798 | 0.052000335  | 0.65652 | -0.303364172 | 0.010261 |
| RAG1        | -0.011189846  | 0.971505 | -0.141140559 | 0.651   | -0.812930271 | 0.010279 |
| RP4-740C4.6 | -0.416870224  | 0.169862 | -0.066447886 | 0.81572 | -0.795069811 | 0.010297 |
| DBNDD1      | -0.578422655  | 0.09192  | -0.351365641 | 0.2956  | -0.880398357 | 0.010327 |
| PPP2R3C     | 0.086924194   | 0.541215 | 0.247486062  | 0.07875 | 0.358793822  | 0.010342 |
| MAP4K5      | 0.177827036   | 0.071517 | 0.14091017   | 0.15237 | 0.251349932  | 0.010423 |
| RSU1        | 0.223309008   | 0.057891 | 0.172088704  | 0.14258 | 0.300240394  | 0.010433 |
| IQSEC3      | -0.71569336   | 0.078895 | -0.603993321 | 0.12975 | -1.030385184 | 0.01051  |
| DHRS4       | -0.047685397  | 0.789567 | -0.048495454 | 0.78385 | -0.458695478 | 0.010528 |
| UBFD1       | 0.134302335   | 0.179063 | 0.126858719  | 0.20337 | 0.254338378  | 0.010543 |
| DNASE1L3    | 0.104061542   | 0.796946 | -0.019828222 | 0.96146 | -1.149246792 | 0.010576 |
| AC018804.7  | -0.438204254  | 0.19686  | -0.643011817 | 0.05991 | -0.90148432  | 0.010595 |
| HCAR1       | -0.347088559  | 0.096586 | -0.205302992 | 0.32242 | -0.532970169 | 0.010634 |
| CDH19       | 1.394780428   | 0.050454 | 1.008900567  | 0.1552  | 1.774193203  | 0.010707 |
| ERCC3       | 0.091514109   | 0.413008 | 0.129365104  | 0.24437 | 0.28232058   | 0.010712 |
| SNRFPF1     | 1.407744676   | 0.14991  | 1.58336237   | 0.10451 | 2.478184669  | 0.010742 |
| PYGB        | -0.009877423  | 0.925938 | -0.142362079 | 0.17954 | -0.270708239 | 0.010773 |
| NRD1        | 0.160959167   | 0.26903  | 0.053060942  | 0.71505 | 0.370152823  | 0.010787 |
| CARHSP1     | -0.085811008  | 0.536584 | -0.235989822 | 0.08919 | -0.354056749 | 0.010805 |
| ZBTB4       | 0.113081806   | 0.36953  | -0.135693482 | 0.28205 | -0.321928808 | 0.010898 |
| XYLT1       | 0.005862459   | 0.984675 | 0.073068544  | 0.81029 | -0.77917682  | 0.010946 |
| TIGD5       | 0.042891      | 0.810912 | -0.018335106 | 0.91796 | -0.458596028 | 0.01096  |
| KHSRP       | -0.133350896  | 0.414966 | -0.156463449 | 0.33854 | -0.41592032  | 0.010984 |
| SAMD12      | -0.342208443  | 0.144581 | -0.161650531 | 0.48955 | -0.595604768 | 0.011009 |
| AC004453.8  | -0.627204558  | 0.140952 | -0.116411922 | 0.77077 | -1.115467764 | 0.011029 |
| IGFBP2      | -0.208572236  | 0.239344 | -0.18044453  | 0.30864 | -0.450422657 | 0.011054 |
| KREMEN1     | 0.192916609   | 0.407167 | -0.401265453 | 0.08428 | -0.594276766 | 0.011089 |
| OSGIN2      | -0.07234455   | 0.683785 | 0.277299995  | 0.11577 | 0.44527301   | 0.011137 |
| RDH11       | 0.017155009   | 0.875306 | 0.212365913  | 0.05162 | 0.276649295  | 0.011185 |
| FAT2        | 0.88247317    | 0.280804 | -0.223445702 | 0.78637 | -2.196112684 | 0.011224 |
| HMGA2       | 0.186075872   | 0.20546  | 0.043264692  | 0.76843 | 0.372413395  | 0.011204 |
| TRIM2       | -0.133722656  | 0.192304 | -0.107772025 | 0.29245 | -0.259683298 | 0.011279 |
| NONO        | 0.288647607   | 0.102116 | 0.100722567  | 0.56838 | 0.446963538  | 0.011342 |
| MYL12A      | -0.059719206  | 0.482524 | 0.011100915  | 0.89587 | 0.214319954  | 0.011358 |
| CST3        | 0.027479462   | 0.849439 | -0.070803741 | 0.62463 | -0.366260626 | 0.011446 |
| CEP170      | 0.426830657   | 0.06746  | 0.285388293  | 0.22132 | 0.589028948  | 0.011533 |
| BRD2        | 0.236036643   | 0.05813  | 0.136175496  | 0.27425 | 0.313847612  | 0.011676 |

|            |              |          |              |         |              |          |
|------------|--------------|----------|--------------|---------|--------------|----------|
| SMURF2     | 0.097483618  | 0.261706 | 0.165199706  | 0.05579 | 0.217154107  | 0.011683 |
| IRVMER34   | -0.444576835 | 0.133209 | -0.158384174 | 0.58712 | -0.744489122 | 0.011769 |
| EXOSC5     | -0.478398484 | 0.062548 | -0.477056976 | 0.06158 | -0.646418051 | 0.011792 |
| ISL2       | 0.503125029  | 0.185691 | -0.052220967 | 0.89137 | 0.934137337  | 0.011781 |
| TSPYL2     | 0.165636372  | 0.286492 | 0.096104577  | 0.5356  | 0.389047875  | 0.01179  |
| PRPF3      | 0.105424216  | 0.250327 | 0.002024927  | 0.98233 | 0.227946676  | 0.011839 |
| ENTPD4     | 0.1819943    | 0.121213 | -0.049843766 | 0.67082 | 0.294461041  | 0.011901 |
| P13-104F24 | 0.425280637  | 0.324758 | 0.382271971  | 0.37116 | 1.026132523  | 0.011948 |
| VEGFB      | -0.172261436 | 0.229969 | -0.137031763 | 0.33701 | -0.361723961 | 0.01195  |
| MSI1       | -0.051103631 | 0.892127 | -0.31326389  | 0.40775 | -0.954228677 | 0.012113 |
| G3BP2      | 0.023931935  | 0.834319 | -0.039053349 | 0.7327  | 0.286525458  | 0.012143 |
| USP42      | 0.123057041  | 0.331337 | 0.2025802    | 0.10818 | 0.313853711  | 0.012143 |
| CRYM       | -0.918403466 | 0.082474 | -0.404773467 | 0.41388 | -1.342533111 | 0.012167 |
| ERBB2      | -0.031223073 | 0.821639 | -0.078186336 | 0.5719  | -0.346858199 | 0.012207 |
| ECSIT      | -0.214610552 | 0.211265 | -0.245019653 | 0.15117 | -0.430061333 | 0.012255 |
| NYNRIN     | 0.130650077  | 0.491659 | -0.240782365 | 0.20532 | -0.477011385 | 0.012248 |
| MRPL17     | -0.220532703 | 0.158052 | -0.043658297 | 0.7787  | -0.39044104  | 0.012292 |
| TMEM54     | -0.083536707 | 0.647717 | -0.05635271  | 0.75563 | -0.459695537 | 0.012284 |
| HES6       | -0.381306706 | 0.203342 | -0.459132404 | 0.12249 | -0.756183442 | 0.012309 |
| FAM3A      | -0.145596411 | 0.481931 | -0.309430152 | 0.1343  | -0.520337008 | 0.012383 |
| HLA-DMA    | -0.525607456 | 0.10479  | -0.137960248 | 0.6682  | -0.816319867 | 0.012368 |
| VSTM4      | 0.028052116  | 0.909191 | -0.056666052 | 0.81745 | -0.621912798 | 0.012371 |
| SRSF12     | 0.437121235  | 0.059809 | 0.127349404  | 0.58409 | 0.577762708  | 0.012406 |
| DNASE2     | -0.300263697 | 0.14374  | -0.135345381 | 0.50583 | -0.511315503 | 0.012412 |
| SNX3       | 0.113575491  | 0.33013  | 0.188943026  | 0.10445 | 0.290625536  | 0.01242  |
| CIAPIN1    | 0.11785168   | 0.340822 | 0.135017523  | 0.27216 | 0.305797922  | 0.012461 |
| SOCS2      | 0.669192502  | 0.051341 | 0.313890555  | 0.36133 | 0.851270335  | 0.012458 |
| RALGAPB    | 0.12722919   | 0.09757  | 0.045870663  | 0.54869 | 0.190465707  | 0.012503 |
| ESPNP      | -0.24085883  | 0.657178 | -0.29650171  | 0.58474 | -1.423525033 | 0.012581 |
| GLT1D1     | 0.75573806   | 0.242824 | -0.196131096 | 0.76654 | 1.579022107  | 0.01258  |
| ERBB2IP    | 0.074888369  | 0.552856 | 0.098015875  | 0.43684 | 0.314372743  | 0.012596 |
| HAGHL      | -0.692741199 | 0.125011 | -0.729477709 | 0.10024 | -1.111556762 | 0.012679 |
| B3GNT1     | -0.187087484 | 0.145033 | -0.225213412 | 0.07713 | -0.318013328 | 0.012726 |
| PTPLB      | 0.079183741  | 0.379503 | 0.137503472  | 0.12507 | 0.222571035  | 0.012811 |
| CCNYL1     | 0.149445249  | 0.449099 | 0.243426949  | 0.21617 | 0.488304925  | 0.012829 |
| FAM114A2   | 0.044771654  | 0.848674 | 0.130612121  | 0.57588 | -0.583084372 | 0.012938 |
| FBXL8      | 0.077669944  | 0.831154 | 0.233118025  | 0.51522 | -0.947829482 | 0.012945 |
| TDRD7      | 0.188436181  | 0.229219 | 0.284858774  | 0.06738 | 0.385803518  | 0.012937 |
| TTC7A      | -0.1548427   | 0.392703 | -0.114900293 | 0.5217  | -0.449194386 | 0.012924 |
| TMEM86A    | 0.632860651  | 0.061721 | 0.360794495  | 0.27915 | 0.820040455  | 0.013065 |
| ACOT9      | 0.048875803  | 0.683405 | 0.172455706  | 0.14762 | 0.293755785  | 0.013078 |
| SNX22      | 0.244175541  | 0.133413 | -0.048181093 | 0.76845 | 0.395115533  | 0.013096 |
| TP53INP1   | 0.130228353  | 0.266042 | 0.100291989  | 0.38974 | 0.287569328  | 0.013137 |
| GOLGA7     | 0.131372254  | 0.251376 | 0.006849191  | 0.95223 | 0.282090024  | 0.013165 |
| ZNF439     | 0.263109637  | 0.355467 | 0.147383723  | 0.60619 | 0.694133208  | 0.013207 |
| CDKN2C     | -0.514109774 | 0.194951 | -0.361246954 | 0.35604 | -0.987211173 | 0.01322  |
| USH1C      | -0.150535837 | 0.513455 | -0.355111621 | 0.12295 | -0.57078091  | 0.013237 |

|            |              |          |              |         |              |          |
|------------|--------------|----------|--------------|---------|--------------|----------|
| ACOT1      | -0.297079956 | 0.445424 | -0.179453131 | 0.63948 | -1.000337082 | 0.013254 |
| ZFP36L2    | -0.088503377 | 0.616953 | -0.177100653 | 0.31656 | -0.438592584 | 0.01326  |
| ARRDC4     | -0.419257394 | 0.068234 | -0.390829755 | 0.08898 | -0.569219929 | 0.013275 |
| CAV2       | -0.312968128 | 0.075406 | -0.064460686 | 0.71238 | -0.434686573 | 0.01334  |
| CBWD2      | -0.042137478 | 0.723281 | 0.18492914   | 0.1161  | 0.290164722  | 0.013364 |
| OSBPL7     | -0.164243956 | 0.480259 | -0.103772823 | 0.65476 | -0.574968036 | 0.013469 |
| PLA2R1     | 0.220704307  | 0.497224 | 0.076230548  | 0.81452 | -0.8096323   | 0.013538 |
| BX842568.2 | -0.652858791 | 0.200458 | -0.105884311 | 0.82686 | -1.310656627 | 0.013607 |
| POLR2J     | -0.19446302  | 0.129988 | 0.051938535  | 0.67832 | -0.314402959 | 0.01364  |
| PIKFYVE    | 0.156546062  | 0.214766 | 0.050091356  | 0.69094 | 0.310176001  | 0.013652 |
| YWHAQ      | -0.067524545 | 0.406459 | 0.059152973  | 0.46593 | 0.199868664  | 0.013657 |
| STIP1      | -0.04511231  | 0.692735 | -0.063996672 | 0.5747  | 0.280653518  | 0.013671 |
| R3HCC1     | 0.020152741  | 0.88283  | 0.03878126   | 0.77447 | 0.331198196  | 0.013735 |
| FKBP10     | -0.109333747 | 0.509941 | -0.202535712 | 0.22212 | -0.408915128 | 0.013744 |
| ZGLP1      | 0.429896344  | 0.308532 | 0.259348567  | 0.53049 | 1.001505006  | 0.013761 |
| DAK        | -0.223236362 | 0.118939 | -0.143502361 | 0.30951 | -0.352459824 | 0.013774 |
| ORAI3      | 0.152685099  | 0.297196 | 0.098981177  | 0.49736 | -0.364549907 | 0.01379  |
| TNXB       | -0.419759765 | 0.427897 | -0.395125848 | 0.45593 | -1.304533614 | 0.013867 |
| CD99       | 0.403265594  | 0.054625 | 0.19734878   | 0.34674 | 0.515291753  | 0.0139   |
| NRF1       | 0.142149754  | 0.338475 | 0.119316987  | 0.41529 | 0.358017972  | 0.013937 |
| SLC2A12    | 0.057832628  | 0.857446 | 0.524962664  | 0.09745 | -0.810595336 | 0.013929 |
| ACER3      | 0.181083176  | 0.272895 | 0.305078127  | 0.06395 | 0.404686598  | 0.013956 |
| TOPORS     | 0.075144547  | 0.407555 | 0.147918351  | 0.0998  | 0.219915126  | 0.014069 |
| STX19      | -0.814198284 | 0.070145 | -0.045245688 | 0.91493 | -1.10884537  | 0.014109 |
| PDCD10     | 0.010626512  | 0.919602 | 0.180515478  | 0.08238 | 0.254324027  | 0.014123 |
| SPRTN      | 0.059914149  | 0.699471 | 0.037494597  | 0.80715 | 0.375266895  | 0.01414  |
| GNA14      | -0.520139096 | 0.135421 | 0.360646426  | 0.2717  | -0.89108123  | 0.014364 |
| ZNF704     | -0.142857021 | 0.552085 | -0.111468948 | 0.6421  | -0.587937779 | 0.014368 |
| ALG12      | -0.216782668 | 0.169736 | -0.092208819 | 0.55854 | -0.38606581  | 0.014448 |
| PAQR7      | -0.035594418 | 0.811298 | -0.066582772 | 0.65326 | -0.366049643 | 0.014454 |
| CNPY3      | -0.168228597 | 0.088634 | -0.158385856 | 0.10549 | -0.239502197 | 0.014486 |
| TTLL12     | -0.118507035 | 0.47233  | -0.30179176  | 0.06705 | -0.402983302 | 0.014537 |
| NFATC3     | 0.039483899  | 0.737944 | 0.038452227  | 0.74422 | 0.28675173   | 0.014565 |
| GIF        | -0.061610319 | 0.902257 | -0.47119323  | 0.36019 | 1.178015079  | 0.014615 |
| RSAD1      | -0.277246341 | 0.071433 | -0.262056869 | 0.08319 | -0.371511687 | 0.014671 |
| FGFR10P2   | 0.032826758  | 0.720971 | 0.052969961  | 0.56003 | 0.219818989  | 0.014723 |
| HMG20B     | -0.146717261 | 0.225282 | -0.15610823  | 0.19483 | -0.294521208 | 0.014761 |
| AMY2B      | -0.225462043 | 0.448474 | -0.148684243 | 0.61475 | -0.724956552 | 0.014774 |
| ST6GALNAC  | 0.873681511  | 0.13438  | 0.760573487  | 0.19645 | 1.399762313  | 0.014888 |
| TULP3      | 0.231578299  | 0.094747 | 0.225688387  | 0.10268 | 0.335678991  | 0.014905 |
| ZNF641     | 0.249717738  | 0.130176 | 0.193688511  | 0.23903 | 0.399726405  | 0.014882 |
| RREB1      | -0.156227447 | 0.327397 | -0.187326032 | 0.24014 | -0.388591577 | 0.014927 |
| PLGRKT     | -0.316713338 | 0.082369 | -0.120079184 | 0.50151 | -0.440151461 | 0.014947 |
| RPP25      | -0.269107547 | 0.252963 | -0.147161553 | 0.52748 | -0.574237646 | 0.014977 |
| CDH10      | -0.305365081 | 0.277339 | -0.008275568 | 0.97636 | -0.685700864 | 0.014996 |
| ZFAND2A    | 0.245729505  | 0.282812 | 0.005589049  | 0.98062 | 0.55075581   | 0.014997 |
| CNR1       | 1.239304239  | 0.10206  | 1.447500771  | 0.0549  | 1.794368779  | 0.015022 |

|          |              |          |              |         |              |          |
|----------|--------------|----------|--------------|---------|--------------|----------|
| MRPL53   | -0.077611663 | 0.611738 | 0.009240532  | 0.95118 | -0.369331591 | 0.015197 |
| ZNF764   | -0.13444115  | 0.434741 | -0.18094455  | 0.29077 | -0.41793189  | 0.015264 |
| RAD23B   | 0.125002612  | 0.345124 | -0.019747304 | 0.88135 | 0.320567169  | 0.01534  |
| ARG2     | 0.249331424  | 0.243165 | 0.062408458  | 0.77013 | 0.511693205  | 0.015403 |
| EGFL7    | -0.029078185 | 0.903883 | -0.202930963 | 0.39934 | -0.584352542 | 0.015399 |
| KRT7     | 0.004809896  | 0.989907 | 0.131381674  | 0.72947 | -0.92199267  | 0.015502 |
| C9orf172 | -0.009687615 | 0.965216 | -0.251986354 | 0.2583  | -0.54702997  | 0.015512 |
| C9orf69  | -0.104978772 | 0.372231 | 0.008192947  | 0.94368 | -0.283482442 | 0.015518 |
| XBP1     | 0.038855373  | 0.875343 | 0.363516269  | 0.14174 | 0.597672232  | 0.015655 |
| SIGMAR1  | -0.271818013 | 0.090071 | -0.223754992 | 0.1622  | -0.38648253  | 0.015851 |
| CLCA1    | -1.889174224 | 0.139313 | -0.031077584 | 0.98044 | -3.110404861 | 0.015988 |
| RAPGEF6  | -0.03540885  | 0.808685 | -0.010466517 | 0.94285 | 0.350843472  | 0.015992 |
| EPHX1    | -0.202779858 | 0.415233 | -0.321344957 | 0.19549 | -0.603243464 | 0.016114 |
| MAP3K5   | -0.612823624 | 0.050248 | 0.020046164  | 0.94873 | -0.7543982   | 0.01611  |
| TNFRSF19 | 0.101090433  | 0.662549 | -0.085265947 | 0.71302 | -0.559403761 | 0.016196 |
| GPER1    | -0.107522093 | 0.772154 | 0.353504787  | 0.32719 | -0.930599055 | 0.016256 |
| MAL      | 0.044502092  | 0.957794 | -1.434447451 | 0.10874 | -2.297529566 | 0.016252 |
| HMGCR    | -0.009182806 | 0.946061 | 0.046287446  | 0.73299 | 0.32574003   | 0.016311 |
| MS4A10   | -0.725927637 | 0.055719 | -0.513993284 | 0.15899 | -0.904462011 | 0.016453 |
| WDR83OS  | -0.200125967 | 0.135622 | -0.172680661 | 0.19566 | -0.319737052 | 0.016755 |
| ARL5B    | -0.060567157 | 0.557725 | 0.015067742  | 0.88385 | 0.246101034  | 0.016859 |
| PTER     | -0.375994627 | 0.075894 | -0.240474508 | 0.25398 | -0.504555642 | 0.016907 |
| TMEM105  | -0.634600606 | 0.132764 | -0.644870179 | 0.12626 | -1.013505796 | 0.017068 |
| RNF34    | 0.036653558  | 0.747348 | -0.016188213 | 0.88595 | 0.267545232  | 0.017142 |
| PRC1     | -0.01150113  | 0.945075 | 0.180662287  | 0.27785 | 0.396125069  | 0.017175 |
| TRAF5    | -0.184584141 | 0.210452 | -0.284426818 | 0.05265 | -0.350308477 | 0.017241 |
| BCL11B   | -0.139097615 | 0.644008 | -0.181488797 | 0.54526 | -0.722857078 | 0.017299 |
| TFR2     | 0.606670216  | 0.074583 | 0.073020633  | 0.83298 | 0.790043733  | 0.017328 |
| SSR1     | -0.104123996 | 0.211586 | -0.070331283 | 0.39758 | -0.197742804 | 0.017472 |
| COQ4     | -0.052210253 | 0.593192 | -0.105958585 | 0.27422 | -0.22982716  | 0.017494 |
| GMFB     | -0.034900965 | 0.682095 | 0.082489518  | 0.32955 | 0.200420271  | 0.017582 |
| TSPO     | -0.003514205 | 0.991591 | -0.189843385 | 0.56938 | -0.802925408 | 0.017575 |
| FAM172A  | -0.189891076 | 0.15498  | -0.021780153 | 0.86918 | -0.315756225 | 0.01769  |
| TTLL5    | 0.208310037  | 0.135904 | -0.041012652 | 0.76878 | 0.330049831  | 0.017693 |
| TUBA4A   | -0.209404    | 0.440428 | -0.278923918 | 0.30379 | -0.645489687 | 0.017684 |
| BMS1P8   | -0.367612544 | 0.302848 | -0.2752779   | 0.43132 | -0.861135015 | 0.017799 |
| SLC48A1  | -0.069868978 | 0.722317 | -0.075182423 | 0.70152 | -0.471741201 | 0.017933 |
| PDGFA    | -0.082247634 | 0.717735 | -0.154903256 | 0.49502 | -0.54193382  | 0.017952 |
| C16orf91 | -0.21869559  | 0.224537 | -0.068233958 | 0.69726 | -0.42477329  | 0.017968 |
| CELF4    | -0.339809825 | 0.365727 | -0.209845995 | 0.57084 | -0.889808981 | 0.018032 |
| PPP2CA   | 0.060702789  | 0.548168 | 0.098776329  | 0.32707 | 0.237931525  | 0.018086 |
| PNPLA8   | -0.024732599 | 0.877548 | 0.032818136  | 0.83755 | 0.377513761  | 0.018119 |
| MCAT     | -0.201704987 | 0.164758 | -0.094955336 | 0.50597 | -0.340282744 | 0.018133 |
| TSPAN31  | -0.215087886 | 0.09511  | -0.030573652 | 0.81149 | -0.302430577 | 0.018155 |
| CHMP7    | -0.013730032 | 0.899721 | -0.012576901 | 0.90735 | 0.253707494  | 0.018203 |
| AMD1     | 0.137564233  | 0.268161 | 0.118248603  | 0.3404  | 0.292496948  | 0.018253 |
| CFC1     | 0.657962273  | 0.381645 | -0.059911269 | 0.93745 | 1.737887527  | 0.018302 |

|             |              |          |              |         |              |          |
|-------------|--------------|----------|--------------|---------|--------------|----------|
| CHCHD3      | 0.007171594  | 0.943299 | 0.094387204  | 0.34636 | 0.235758234  | 0.018333 |
| RAB11A      | 0.070302293  | 0.470802 | 0.170006807  | 0.0805  | 0.22920996   | 0.018431 |
| PLS1        | -0.281970322 | 0.053835 | -0.047728041 | 0.74362 | -0.344133839 | 0.018497 |
| SMARCA2     | -0.366462501 | 0.052539 | -0.208412361 | 0.2686  | -0.444350799 | 0.018513 |
| CLYBL       | -0.534106211 | 0.092656 | -0.474795415 | 0.12231 | -0.731591763 | 0.018642 |
| PGBD5       | 0.170557487  | 0.603348 | -0.140761293 | 0.66779 | -0.777864916 | 0.018637 |
| XRCC5       | -0.029722585 | 0.809827 | 0.117305098  | 0.34203 | 0.290280332  | 0.018674 |
| INHA        | -0.31833336  | 0.262398 | 0.13546683   | 0.6297  | -0.668307451 | 0.01881  |
| NAP1L4P1    | -0.514572712 | 0.136226 | -0.352441452 | 0.29396 | -0.816366326 | 0.018803 |
| USP7        | 0.092429855  | 0.342777 | 0.117601299  | 0.22642 | 0.22812449   | 0.018852 |
| MLLT10      | -0.011818699 | 0.927437 | -0.120388062 | 0.35223 | 0.302162647  | 0.018892 |
| RANBP9      | 0.164799688  | 0.063217 | 0.130332629  | 0.13924 | 0.20649887   | 0.01889  |
| SFPQ        | -0.15346052  | 0.178477 | -0.0890788   | 0.43448 | 0.267377201  | 0.018889 |
| IL17D       | -0.256212272 | 0.14017  | -0.165663387 | 0.32731 | -0.403846135 | 0.018963 |
| PAXBP1      | -0.136780501 | 0.181851 | -0.083467356 | 0.4125  | 0.23753441   | 0.01895  |
| STS         | 0.291918738  | 0.082888 | 0.292344281  | 0.08181 | 0.393484507  | 0.018989 |
| FNTA        | -0.049892729 | 0.651423 | 0.203752527  | 0.06355 | 0.257224724  | 0.019026 |
| SEC31A      | 0.192392309  | 0.061425 | 0.109852587  | 0.28533 | 0.240912618  | 0.019023 |
| TRA2B       | 0.072080421  | 0.499776 | 0.101123551  | 0.34318 | 0.249736651  | 0.019062 |
| CYSTM1      | -0.194194635 | 0.38326  | -0.139611802 | 0.53063 | -0.522053711 | 0.019108 |
| ANLN        | 0.015061252  | 0.941218 | 0.159939513  | 0.43291 | 0.477587371  | 0.01913  |
| CBLL1       | 0.303339755  | 0.056758 | -0.085070708 | 0.59374 | 0.371093896  | 0.019244 |
| CORO1C      | 0.007105749  | 0.930843 | 0.053795147  | 0.51088 | 0.190540873  | 0.01924  |
| HPS5        | -0.125450444 | 0.406425 | -0.257316276 | 0.08609 | -0.350948353 | 0.019251 |
| RXRA        | 0.122812526  | 0.307239 | -0.049824399 | 0.67796 | -0.28155243  | 0.019317 |
| AXIN2       | -0.401064357 | 0.547885 | 0.531472108  | 0.41854 | -1.592711688 | 0.019392 |
| RP11-438J1. | 0.406971745  | 0.095911 | 0.389039074  | 0.1092  | 0.562412789  | 0.019448 |
| ACE         | 0.562490305  | 0.16748  | 0.536766384  | 0.18338 | 0.924513511  | 0.019544 |
| AKIP1       | -0.290571356 | 0.072636 | 0.008804661  | 0.95583 | -0.374292358 | 0.019698 |
| XKR6        | -0.297591388 | 0.147454 | -0.271828397 | 0.17998 | -0.481939246 | 0.019695 |
| SYNCRIP     | -0.069460268 | 0.547503 | 0.102034892  | 0.37626 | 0.268658524  | 0.019723 |
| LTK         | -0.540080204 | 0.275726 | -0.95289703  | 0.0584  | -1.191648143 | 0.019776 |
| DUSP3       | 0.164197587  | 0.067827 | 0.141732822  | 0.11391 | 0.208594603  | 0.019829 |
| ATP6V1D     | 0.090024969  | 0.356814 | 0.137484149  | 0.15578 | 0.22457034   | 0.019893 |
| CELSR1      | -0.161342587 | 0.449425 | -0.000185666 | 0.9993  | -0.497440568 | 0.019916 |
| CHID1       | -0.304565414 | 0.077535 | -0.161065862 | 0.34813 | -0.400542916 | 0.020002 |
| ATP8B2      | 0.31686127   | 0.059556 | 0.19950639   | 0.23497 | 0.389357626  | 0.02009  |
| FAM86JP     | -0.650076109 | 0.082483 | -0.564873343 | 0.12173 | -0.863974144 | 0.020199 |
| KIAA1033    | 0.019860774  | 0.849039 | 0.093243791  | 0.36919 | 0.240873122  | 0.020173 |
| ANTD3-TME   | 0.212168198  | 0.457175 | 0.023917323  | 0.9332  | 0.657766957  | 0.020142 |
| RSPH3       | -0.069993767 | 0.616195 | -0.151815813 | 0.27328 | -0.323416375 | 0.020134 |
| SECTM1      | 0.384484535  | 0.318316 | 0.436909833  | 0.25276 | 0.876446507  | 0.020169 |
| WASF2       | 0.653024224  | 0.418714 | 1.281162185  | 0.11008 | 1.85610543   | 0.0202   |
| AIP         | -0.182507821 | 0.126343 | -0.100322732 | 0.39117 | -0.274662607 | 0.020292 |
| HMGN5       | -0.13058679  | 0.682936 | -0.335236252 | 0.29648 | -0.758304164 | 0.020333 |
| H2AFJ       | -0.09994633  | 0.580925 | 0.079177433  | 0.66025 | -0.419885626 | 0.020407 |
| RC3H2       | -0.024075553 | 0.769426 | -0.040138343 | 0.6241  | 0.189204814  | 0.020396 |



|         |              |          |              |         |              |          |
|---------|--------------|----------|--------------|---------|--------------|----------|
| SMAGP   | -0.258296192 | 0.132311 | -0.155599883 | 0.36085 | -0.396320224 | 0.02045  |
| TMPRSS4 | 0.122911136  | 0.576627 | -0.179379077 | 0.41494 | -0.51054286  | 0.020446 |
| PIGZ    | 0.006634596  | 0.972159 | 0.079911534  | 0.6724  | -0.443857777 | 0.020548 |
| TIMM10B | 0.083321823  | 0.401873 | 0.015467975  | 0.87593 | 0.227811364  | 0.020596 |
| HSPB8   | 0.579991959  | 0.164819 | 0.106279424  | 0.80001 | 0.95957152   | 0.020607 |
| SLC24A1 | -0.095462938 | 0.635868 | -0.291130144 | 0.14697 | -0.46499845  | 0.020618 |
| PSMC3   | 0.052387142  | 0.618573 | 0.182531871  | 0.08137 | 0.24196934   | 0.020752 |
| DMD     | 0.350625139  | 0.112782 | 0.078250128  | 0.72366 | 0.509558217  | 0.020907 |
| OCIAD2  | -0.304010069 | 0.1148   | -0.117537862 | 0.53802 | -0.443194353 | 0.020892 |
| UGT2A3  | -0.54270915  | 0.117777 | 0.281993479  | 0.41271 | -0.800567335 | 0.021014 |
| SBNO1   | 0.02460165   | 0.732296 | -0.006763403 | 0.9248  | 0.16448291   | 0.021227 |
| TLE1    | 0.291114792  | 0.060215 | 0.178963868  | 0.24737 | 0.355984068  | 0.021221 |
| PURA    | -0.139140831 | 0.262907 | -0.014683489 | 0.90519 | -0.284958704 | 0.021352 |
| DUSP18  | 0.061033978  | 0.821278 | -0.059203419 | 0.82582 | -0.634593776 | 0.021407 |
| ARFGAP2 | -0.113628893 | 0.207272 | 0.133415663  | 0.13435 | 0.204516945  | 0.021451 |
| LMAN2   | -0.11520671  | 0.364058 | -0.05577919  | 0.65971 | -0.291627133 | 0.021464 |
| SYT17   | -0.356615212 | 0.271957 | -0.145087657 | 0.65331 | -0.752894085 | 0.02151  |
| P4HA3   | 0.222141151  | 0.691394 | 0.103777319  | 0.85111 | -1.31704776  | 0.021585 |
| LSR     | 0.025542072  | 0.880272 | -0.009227062 | 0.95659 | -0.389870328 | 0.021609 |
| TRIM68  | -0.228274337 | 0.111501 | -0.140124862 | 0.32384 | -0.327737566 | 0.021761 |
| TTLL1   | -0.283634629 | 0.157755 | -0.121653681 | 0.53649 | -0.461058648 | 0.021775 |
| WDYHV1  | -0.145081593 | 0.430208 | -0.15377033  | 0.39738 | -0.417397585 | 0.021782 |
| FGL2    | -0.021832255 | 0.950565 | -0.375762365 | 0.29215 | -0.845844455 | 0.021918 |
| YIPF2   | -0.12812036  | 0.409197 | -0.084541655 | 0.58469 | -0.355982663 | 0.021947 |
| ZNF404  | -0.295843577 | 0.310557 | -0.069693478 | 0.80571 | -0.665836664 | 0.02194  |
| CDK18   | 0.082128231  | 0.74537  | -0.399703602 | 0.11819 | -0.586817245 | 0.022016 |
| ONECUT2 | 0.526125659  | 0.341546 | 0.333301982  | 0.54679 | 1.266053568  | 0.022042 |
| CPSF6   | 0.000112857  | 0.99903  | -0.017890909 | 0.84679 | 0.211520709  | 0.02209  |
| NDUFS6  | -0.219798811 | 0.127162 | -0.110070273 | 0.43946 | -0.327504309 | 0.022081 |
| PRKCDBP | -0.402324478 | 0.193389 | -0.017182614 | 0.95493 | -0.710580803 | 0.022067 |
| PHLDA3  | -0.148585633 | 0.366066 | -0.060374809 | 0.71268 | -0.376321632 | 0.022101 |
| HSD17B4 | 0.119731858  | 0.484491 | 0.300068433  | 0.07944 | 0.391402407  | 0.022124 |
| POLB    | -0.085021228 | 0.557099 | 0.097598624  | 0.49521 | 0.324983408  | 0.022194 |
| RNF212  | 0.005986072  | 0.985484 | 0.310361031  | 0.33763 | -0.767278405 | 0.022186 |
| ACAT2   | 0.101042861  | 0.563522 | 0.167872537  | 0.33671 | 0.398640625  | 0.022398 |
| FBXW4P1 | -0.4000429   | 0.310938 | -0.127019206 | 0.73653 | -0.934087774 | 0.022469 |
| MKNK2   | 0.019176189  | 0.924669 | -0.182827591 | 0.36739 | -0.463260443 | 0.022464 |
| KLLN    | -0.104853092 | 0.556476 | -0.00022377  | 0.99897 | -0.409663983 | 0.022571 |
| PTPN23  | -0.066967049 | 0.787354 | -0.187797428 | 0.45025 | -0.568606659 | 0.022612 |
| CBR3    | -0.393273504 | 0.390049 | -0.401025704 | 0.37477 | -1.08544487  | 0.02275  |
| PSMA3   | 0.064694257  | 0.529804 | 0.142957177  | 0.1627  | 0.232829267  | 0.022777 |
| OAF     | 0.254602813  | 0.065535 | 0.080886176  | 0.5577  | -0.319066103 | 0.02289  |
| RBM12   | 0.187354539  | 0.25708  | -0.063738977 | 0.69971 | 0.375518704  | 0.022901 |
| DYNC1I2 | 0.135275441  | 0.081067 | 0.094540256  | 0.22095 | 0.175323674  | 0.022981 |
| TSPAN7  | 0.43787911   | 0.392025 | 0.561867119  | 0.26523 | 1.125038111  | 0.022984 |
| BNIP3P1 | 0.944591512  | 0.292374 | 0.970774074  | 0.27872 | 2.027702732  | 0.023041 |
| IL10RB  | -0.241737479 | 0.189112 | 0.094925262  | 0.60274 | -0.417675845 | 0.023034 |

|             |              |          |              |         |              |          |
|-------------|--------------|----------|--------------|---------|--------------|----------|
| KCTD3       | 0.099877486  | 0.446743 | 0.230356511  | 0.07833 | 0.297001485  | 0.023138 |
| EPB41L5     | -0.055508513 | 0.696682 | -0.020997968 | 0.88258 | 0.321821729  | 0.023226 |
| IMPAD1      | 0.046702954  | 0.782506 | 0.258494052  | 0.12646 | 0.38387369   | 0.023221 |
| TRPT1       | 0.020565289  | 0.904233 | 0.057903024  | 0.73235 | -0.386930129 | 0.023238 |
| SHKBP1      | 0.34470748   | 0.051368 | 0.065375746  | 0.71212 | -0.403519521 | 0.023272 |
| TRAV8-5     | 0.054229468  | 0.812254 | 0.097926188  | 0.66453 | 0.502253301  | 0.023447 |
| C16orf87    | 0.107752227  | 0.467121 | 0.014810347  | 0.92022 | 0.331962103  | 0.023478 |
| TFAP4       | -0.081759599 | 0.699925 | -0.290012404 | 0.17051 | -0.480603803 | 0.02347  |
| MFAP1       | -0.028129758 | 0.790578 | 0.018931155  | 0.85735 | 0.237033814  | 0.023525 |
| FKBP8       | 0.125820565  | 0.233443 | -0.102083494 | 0.33383 | -0.239647099 | 0.023585 |
| GBP6        | -0.426513152 | 0.325119 | -0.458201562 | 0.28569 | -1.007835705 | 0.023642 |
| KCTD2       | 0.219057215  | 0.132846 | 0.107920921  | 0.45771 | 0.327485233  | 0.023643 |
| MITD1       | 0.020907064  | 0.860262 | 0.215046426  | 0.06686 | 0.264394273  | 0.023649 |
| GNL1        | 0.224289386  | 0.164391 | 0.15249034   | 0.34306 | 0.363598138  | 0.023732 |
| C14orf80    | -0.35270071  | 0.187777 | 0.085321388  | 0.74463 | -0.605377715 | 0.023856 |
| CHD7        | 0.44626051   | 0.067974 | 0.309329396  | 0.2058  | 0.552019994  | 0.023854 |
| RP11-313J2. | 0.267137349  | 0.408075 | -0.213778169 | 0.50799 | -0.729318892 | 0.023841 |
| AKR1E2      | 0.017235055  | 0.963147 | -0.592531654 | 0.14427 | -0.924033623 | 0.023869 |
| PARP6       | 0.176129326  | 0.20946  | -0.06373765  | 0.64955 | 0.315486724  | 0.023947 |
| ALG9        | 0.035706242  | 0.809933 | 0.127693786  | 0.38761 | 0.333070721  | 0.02398  |
| CBX8        | -0.148149209 | 0.541547 | -0.455441912 | 0.05781 | -0.540504337 | 0.024003 |
| MAPK8       | 0.096791189  | 0.420368 | 0.171962642  | 0.15057 | 0.268680628  | 0.024082 |
| C1D         | 0.193782992  | 0.36051  | 0.128517664  | 0.54213 | 0.474015998  | 0.024147 |
| CCDC7       | -0.531984238 | 0.074559 | -0.202138016 | 0.49178 | -0.671463582 | 0.024227 |
| DMTN        | -0.303889698 | 0.243588 | -0.314803806 | 0.22603 | -0.587775571 | 0.024191 |
| DDX1        | 0.01133763   | 0.917078 | 0.07831196   | 0.46878 | 0.242282127  | 0.024332 |
| PCDH7       | -0.037008957 | 0.864019 | 0.079155073  | 0.71369 | -0.486607808 | 0.024356 |
| C11orf58    | -0.040362485 | 0.668728 | -0.023181065 | 0.80523 | 0.211164684  | 0.024381 |
| GAS6        | -0.418608534 | 0.074657 | -0.269565992 | 0.24634 | -0.525778757 | 0.024432 |
| ZNF143      | 0.112848945  | 0.390622 | -0.063283366 | 0.62976 | 0.292908952  | 0.024413 |
| PIP4K2A     | 0.072095886  | 0.665679 | 0.076639609  | 0.64674 | 0.373784546  | 0.024485 |
| TMEM51      | -0.026803794 | 0.882676 | -0.105023653 | 0.56187 | -0.410313523 | 0.024563 |
| KLF3        | 0.165437271  | 0.104017 | 0.156896578  | 0.12265 | 0.228226186  | 0.024655 |
| FBXO44      | -0.072630581 | 0.700044 | -0.042616829 | 0.81963 | -0.425052875 | 0.024673 |
| RAB3IP      | -0.035330646 | 0.82678  | 0.22010839   | 0.17081 | 0.360227455  | 0.024733 |
| TSPYL1      | 0.122026526  | 0.142725 | 0.093871263  | 0.2584  | 0.186033102  | 0.024833 |
| PGBD4P7     | -0.066130351 | 0.784789 | -0.222122768 | 0.35844 | -0.557308764 | 0.024892 |
| DENND5B     | 0.19992665   | 0.361517 | 0.114694973  | 0.60086 | 0.485408082  | 0.025018 |
| EEFSEC      | 0.069827884  | 0.678242 | -0.135721239 | 0.41967 | -0.385878144 | 0.025014 |
| TINAGL1     | -0.19453676  | 0.281179 | -0.243076615 | 0.17785 | -0.404275155 | 0.025113 |
| WHSC1L1     | 0.110705785  | 0.267708 | 0.081903375  | 0.41119 | 0.222820828  | 0.025125 |
| SLC25A20    | 0.127298749  | 0.525634 | 0.077591001  | 0.69801 | -0.451065272 | 0.02515  |
| DOHH        | -0.203813552 | 0.504212 | -0.282920694 | 0.34923 | -0.691168309 | 0.025256 |
| HNRNPM      | 0.165425231  | 0.247749 | 0.145342536  | 0.30962 | 0.31979137   | 0.02528  |
| NF2         | -0.126190145 | 0.162185 | 0.014733527  | 0.86993 | -0.20168116  | 0.025338 |
| FAM69C      | -1.126506291 | 0.145122 | -1.42765888  | 0.06439 | -1.793775019 | 0.025395 |
| SULT1B1     | -0.203691532 | 0.317851 | 0.042721125  | 0.83391 | -0.455682377 | 0.025454 |

|           |              |          |              |         |              |          |
|-----------|--------------|----------|--------------|---------|--------------|----------|
| LMX1B     | -0.36114659  | 0.489742 | -0.861223333 | 0.1058  | -1.211687183 | 0.025659 |
| PFKL      | -0.023781778 | 0.821877 | -0.087980781 | 0.40446 | -0.235682996 | 0.025649 |
| NPTX1     | 0.024678155  | 0.973275 | 0.048027309  | 0.94795 | -1.662296482 | 0.025748 |
| UBE2J1    | 0.010703274  | 0.906199 | 0.163038085  | 0.07096 | 0.201092594  | 0.02573  |
| FAM3D     | 0.397255994  | 0.469557 | 0.829268797  | 0.1274  | -1.29594285  | 0.025806 |
| SATB1     | -0.139026169 | 0.457479 | -0.337720275 | 0.07127 | -0.417339303 | 0.025805 |
| HARS      | 0.045724008  | 0.593633 | 0.110653052  | 0.19411 | 0.18949363   | 0.025821 |
| ARL13B    | 0.254044479  | 0.118664 | 0.036834632  | 0.81971 | 0.3578552    | 0.026029 |
| KNDC1     | 0.113819343  | 0.834284 | -0.719559241 | 0.19096 | -1.22820299  | 0.026019 |
| TAF5L     | 0.031653123  | 0.741562 | 0.140049318  | 0.13975 | 0.209802427  | 0.026074 |
| TRMT61A   | 0.003598519  | 0.981325 | 0.159294977  | 0.28997 | -0.344619381 | 0.026076 |
| ICAM3     | -0.447480745 | 0.064797 | -0.26762009  | 0.2592  | -0.535519688 | 0.0262   |
| POLR3G    | -0.29397507  | 0.367365 | -0.550558473 | 0.08808 | -0.719045142 | 0.026251 |
| GATA6     | -0.407449363 | 0.057074 | -0.364357461 | 0.08806 | -0.474852052 | 0.026282 |
| GNPTAB    | -0.145685326 | 0.149256 | -0.089087671 | 0.376   | -0.223828909 | 0.026263 |
| RELN      | -0.030786626 | 0.971637 | 0.069817573  | 0.93605 | 1.917704344  | 0.026283 |
| LRAT      | 0.293903783  | 0.409969 | 0.177063754  | 0.61747 | 0.783434095  | 0.026324 |
| REPS2     | -0.412312246 | 0.095626 | 0.177521395  | 0.46956 | -0.550263962 | 0.026331 |
| SIRT3     | -0.264002407 | 0.111943 | -0.147710037 | 0.3663  | -0.366922025 | 0.026355 |
| GAA       | 0.014792165  | 0.957312 | -0.306558824 | 0.26663 | -0.61473968  | 0.02644  |
| RNF43     | -0.3993084   | 0.151825 | -0.173142272 | 0.53326 | -0.617540131 | 0.026595 |
| SDR16C5   | 1.205193818  | 0.057698 | 0.2763846    | 0.67172 | 1.401176509  | 0.026611 |
| PHLDB2    | 0.282915401  | 0.183276 | -0.138242474 | 0.51571 | 0.470659987  | 0.026665 |
| CDK13     | 0.185733571  | 0.080977 | 0.149055214  | 0.16132 | 0.235030472  | 0.026829 |
| CTSD      | -0.019187663 | 0.897179 | -0.277463181 | 0.06177 | -0.328529644 | 0.027054 |
| NEB       | 0.243480597  | 0.444392 | 0.473188507  | 0.13112 | 0.692777355  | 0.02705  |
| TMEM161A  | 0.261501805  | 0.146256 | -0.066072717 | 0.7133  | 0.395646595  | 0.027053 |
| PGM1      | -0.089305084 | 0.388378 | 0.051773574  | 0.61565 | -0.228408187 | 0.027229 |
| SMIM13    | 0.044141146  | 0.764124 | 0.155529208  | 0.28784 | 0.322110824  | 0.027285 |
| GLTPD1    | 0.130394813  | 0.468896 | -0.104878805 | 0.56236 | -0.404258944 | 0.0273   |
| ALDOC     | -0.036223599 | 0.870775 | -0.12566951  | 0.57237 | -0.491835271 | 0.027324 |
| RABEP2    | -0.16093541  | 0.340289 | 0.060977645  | 0.71419 | -0.374014021 | 0.027416 |
| NUP153    | -0.013260156 | 0.906593 | -0.088008946 | 0.43558 | 0.247938936  | 0.02754  |
| PUM2      | -0.222091374 | 0.066238 | -0.087620025 | 0.46739 | -0.265281354 | 0.027767 |
| SELT      | 0.126165065  | 0.379001 | 0.14165281   | 0.32194 | 0.314531379  | 0.027758 |
| VANGL1    | -0.14431941  | 0.30617  | -0.036701445 | 0.79316 | -0.309828688 | 0.027785 |
| PP13439   | 0.219914116  | 0.460036 | 0.076238334  | 0.79748 | 0.633795539  | 0.027879 |
| PTPN12    | 0.265712784  | 0.12048  | 0.237240688  | 0.165   | 0.374817272  | 0.028085 |
| KIDINS220 | 0.020093721  | 0.836039 | -0.043016738 | 0.65719 | 0.212379343  | 0.0281   |
| ACO1      | -0.18016119  | 0.085108 | 0.060398405  | 0.56174 | -0.229066018 | 0.028212 |
| DNAJB12   | 0.06400539   | 0.438531 | 0.092190798  | 0.25819 | 0.177807832  | 0.02814  |
| FZD7      | 0.259677245  | 0.110692 | 0.162418798  | 0.31819 | 0.356831986  | 0.028116 |
| GLS2      | -0.115836198 | 0.773251 | -0.484233093 | 0.22517 | -0.888790422 | 0.028206 |
| PLEKHG4   | -0.067386743 | 0.863951 | -0.049860621 | 0.89846 | -0.872524165 | 0.028198 |
| RAB1B     | -0.286241563 | 0.325165 | -0.408785411 | 0.16    | -0.638776537 | 0.028196 |
| TIMM22    | 0.15880955   | 0.215054 | 0.072227806  | 0.5694  | 0.270204376  | 0.028279 |
| MUS81     | 0.186173206  | 0.150816 | 0.138791373  | 0.28234 | 0.282714213  | 0.028308 |

|             |              |          |              |         |              |          |
|-------------|--------------|----------|--------------|---------|--------------|----------|
| ALDH1L2     | -0.318276403 | 0.333374 | -0.359829016 | 0.2712  | -0.727627982 | 0.028343 |
| EPB41L2     | 0.235605513  | 0.124817 | 0.024954617  | 0.87079 | 0.336082805  | 0.028339 |
| MAPK13      | -0.140056002 | 0.255395 | -0.14056139  | 0.25272 | -0.269535014 | 0.0284   |
| SLC17A9     | -0.221663559 | 0.280383 | -0.30326269  | 0.13933 | -0.449284536 | 0.028418 |
| TSLP        | -0.837191069 | 0.422113 | 0.177662653  | 0.86318 | -2.310571497 | 0.028424 |
| GGA3        | 0.072257767  | 0.672583 | 0.163918246  | 0.33854 | 0.37342422   | 0.02847  |
| SERGEF      | -0.199854893 | 0.25047  | -0.103188444 | 0.54551 | -0.377355281 | 0.02854  |
| BRF2        | 0.066260513  | 0.682278 | 0.132835508  | 0.40741 | 0.348287862  | 0.02859  |
| WTAPP1      | 0.112522096  | 0.807617 | -0.28597809  | 0.53625 | -1.029757444 | 0.028596 |
| PAK7        | -0.308885979 | 0.639313 | -0.396821001 | 0.54533 | 1.363567029  | 0.028678 |
| LMF1        | -0.2764212   | 0.183027 | -0.281682588 | 0.17205 | -0.454425136 | 0.028737 |
| AC112229.1  | -0.434811771 | 0.479279 | -0.194770558 | 0.74502 | -1.434758683 | 0.028764 |
| FRRS1       | -0.516101327 | 0.068408 | -0.094399072 | 0.73811 | -0.617738325 | 0.028808 |
| YWHAE       | 0.113501152  | 0.234201 | 0.087059764  | 0.36084 | 0.207986615  | 0.028827 |
| FGFRL1      | -0.247530499 | 0.138427 | -0.282073218 | 0.09093 | -0.364561115 | 0.028889 |
| QSOX1       | -0.202943716 | 0.237708 | -0.155273625 | 0.36625 | -0.37552881  | 0.028898 |
| MED21       | -0.030508199 | 0.756185 | 0.083652756  | 0.38581 | 0.209718448  | 0.028951 |
| SNX18P3     | -0.574062194 | 0.170516 | -0.327840306 | 0.4187  | -0.924259525 | 0.028948 |
| DRD1        | -0.601450498 | 0.196578 | -0.620566183 | 0.1756  | -1.041431781 | 0.029126 |
| C9orf131    | 0.637126829  | 0.126833 | 0.712811791  | 0.08638 | 0.907143431  | 0.029176 |
| PPP1R3G     | 0.215884588  | 0.355629 | -0.169958576 | 0.4705  | -0.520305767 | 0.029184 |
| NUDCD1      | -0.105661954 | 0.311896 | -0.105287923 | 0.30938 | 0.22346988   | 0.0292   |
| CCNT2       | -0.068362449 | 0.425843 | -0.010363655 | 0.90336 | 0.185369811  | 0.029212 |
| LEO1        | 0.000344283  | 0.996925 | -0.07589468  | 0.39308 | 0.191331198  | 0.02928  |
| LIPT2       | 0.298516384  | 0.184163 | 0.300699109  | 0.1752  | 0.476334078  | 0.029285 |
| GNA13       | 0.16234617   | 0.076369 | 0.007828709  | 0.93181 | 0.198697711  | 0.02947  |
| STARD10     | -0.190764063 | 0.195561 | -0.262182155 | 0.07516 | -0.320805326 | 0.029501 |
| ATP5G1      | -0.25233259  | 0.089161 | -0.002292346 | 0.98759 | -0.321872731 | 0.029598 |
| DPP7        | 0.05600958   | 0.835286 | -0.174135068 | 0.518   | -0.587314021 | 0.029596 |
| FAM69B      | 0.018909494  | 0.905872 | -0.220292163 | 0.1682  | -0.349111567 | 0.029677 |
| IP4-545K15. | 0.474796158  | 0.208141 | -0.023710364 | 0.95008 | 0.815581187  | 0.029707 |
| DOLK        | 0.205907744  | 0.137593 | 0.163144431  | 0.23654 | 0.297314306  | 0.029723 |
| HSD17B2     | -0.026115998 | 0.942342 | -0.375013505 | 0.29894 | -0.786141486 | 0.02973  |
| PTGER3      | 0.169714461  | 0.545886 | -0.448584626 | 0.11111 | 0.60937346   | 0.029776 |
| H6PD        | 0.05493393   | 0.601466 | -0.103016706 | 0.32755 | -0.228519135 | 0.029998 |
| KLK6        | -0.137454498 | 0.814542 | -0.31939842  | 0.58492 | -1.291074672 | 0.030093 |
| IDI1        | 0.067815081  | 0.628431 | 0.018105263  | 0.89715 | 0.303395297  | 0.03012  |
| P11-1415C14 | -2.222676313 | 0.483918 | -2.398797303 | 0.44993 | -7.195645793 | 0.030148 |
| VN1R83P     | -0.499775855 | 0.198855 | -0.347942598 | 0.35524 | -0.854405695 | 0.030251 |
| EPHB6       | -0.624275464 | 0.438447 | -1.504894509 | 0.06631 | -1.811681681 | 0.030332 |
| CPM         | 0.498019129  | 0.178407 | 0.525407226  | 0.15539 | 0.799461259  | 0.030381 |
| UBE2I       | 0.075389304  | 0.54542  | -0.000398023 | 0.99745 | 0.269155008  | 0.030382 |
| UTP3        | 0.03220591   | 0.814324 | 0.158529865  | 0.24335 | 0.292723724  | 0.030439 |
| ZNF750      | 0.729299758  | 0.315294 | 0.181213228  | 0.80685 | -1.744782489 | 0.030559 |
| PLLIP       | -0.254718144 | 0.136192 | -0.27204155  | 0.10985 | -0.368425196 | 0.030586 |
| PLEKHH3     | 0.033023532  | 0.886692 | -0.121960035 | 0.59946 | -0.503297646 | 0.030616 |
| TBCB        | 0.190387701  | 0.079906 | 0.147174481  | 0.17453 | 0.233403702  | 0.03062  |

|             |              |          |              |         |              |          |
|-------------|--------------|----------|--------------|---------|--------------|----------|
| CELSR2      | -0.039670977 | 0.887241 | -0.464867629 | 0.09736 | -0.607801102 | 0.030635 |
| TMEM30B     | -0.17193484  | 0.289673 | -0.108014893 | 0.50443 | -0.349977524 | 0.03092  |
| SOX8        | -0.214531735 | 0.455057 | 0.215099736  | 0.44655 | -0.623265707 | 0.031002 |
| EEF1A1P11   | -0.198981739 | 0.292565 | -0.238567744 | 0.20512 | -0.407360812 | 0.031037 |
| ZFX         | -0.02295539  | 0.756484 | 0.044370633  | 0.54647 | 0.158138548  | 0.031078 |
| C16orf13    | -0.02142119  | 0.890098 | -0.17930793  | 0.24712 | -0.335257025 | 0.031117 |
| USP39       | 0.238991249  | 0.133767 | 0.243446669  | 0.12587 | 0.341984673  | 0.031122 |
| DNAJC8      | 0.162344599  | 0.077003 | 0.012514933  | 0.89142 | 0.196759472  | 0.031227 |
| CACNA1A     | 0.274760075  | 0.638844 | 0.617077811  | 0.28227 | 1.219348779  | 0.031346 |
| CDKN1B      | -0.165134354 | 0.397312 | -0.091278985 | 0.63878 | -0.420147005 | 0.031294 |
| INPP1       | 0.149077753  | 0.452104 | 0.011742431  | 0.95273 | 0.42455476   | 0.031313 |
| ZNF395      | -0.139259332 | 0.385477 | -0.300457221 | 0.06118 | -0.345538043 | 0.031301 |
| ZSCAN16     | -0.167286154 | 0.300766 | 0.098729726  | 0.5255  | 0.326921005  | 0.031724 |
| PPAPDC1B    | -0.207920487 | 0.098935 | -0.131240893 | 0.29153 | -0.268019268 | 0.031766 |
| SEC14L4     | -0.621053859 | 0.079708 | -0.538013388 | 0.11815 | -0.75034516  | 0.031803 |
| SIDT1       | 0.100961833  | 0.759348 | -0.149925466 | 0.64718 | -0.726323348 | 0.031786 |
| ZBTB3       | -0.056887119 | 0.761668 | -0.159670696 | 0.39546 | -0.403769878 | 0.031822 |
| WTAP        | 0.101538392  | 0.26835  | 0.135447659  | 0.13749 | 0.195279416  | 0.031909 |
| TBX18       | 0.787052626  | 0.154338 | 0.052938277  | 0.92383 | 1.182830613  | 0.031964 |
| MAATS1      | 0.523168337  | 0.292581 | 0.289774792  | 0.55879 | 1.05179147   | 0.032071 |
| VSTM2L      | 0.0996663    | 0.815207 | -0.115949689 | 0.78726 | -0.968863712 | 0.032106 |
| ABHD2       | -0.202643796 | 0.311774 | -0.075689485 | 0.70543 | -0.429019394 | 0.03223  |
| CTC-503J8.6 | 1.658042447  | 0.053451 | 0.9357751    | 0.27844 | -2.057873373 | 0.032444 |
| FBXO18      | 0.047420726  | 0.590627 | 0.117025031  | 0.17986 | 0.1862486    | 0.032458 |
| OR7E59P     | 0.313462116  | 0.598609 | 0.384130163  | 0.51382 | 1.219897163  | 0.032501 |
| ARL4C       | 0.04374257   | 0.888535 | -0.117068446 | 0.7073  | -0.671954702 | 0.032524 |
| C22orf39    | 0.10199043   | 0.364508 | 0.134933369  | 0.22943 | 0.237079015  | 0.032552 |
| HPS6        | -0.233156653 | 0.064707 | -0.01336696  | 0.91368 | -0.266130981 | 0.032749 |
| TBC1D1      | 0.247061034  | 0.112624 | 0.133423528  | 0.39086 | 0.331166731  | 0.032753 |
| C14orf39    | 0.116998752  | 0.837134 | 0.482571969  | 0.39367 | 1.206606829  | 0.03278  |
| MIR3916     | -0.082234231 | 0.388242 | -0.011475545 | 0.90315 | 0.199265226  | 0.032901 |
| PSMA4       | -0.123336262 | 0.151315 | 0.031650669  | 0.71102 | 0.181628205  | 0.032948 |
| DSTYK       | 0.164559387  | 0.181806 | 0.171123378  | 0.16238 | 0.259923783  | 0.033031 |
| FOXP2       | 0.371424838  | 0.222847 | -0.363333769 | 0.23399 | 0.648757111  | 0.033057 |
| LRRK2       | 1.254411627  | 0.066279 | 1.174959925  | 0.08531 | 1.462854532  | 0.033081 |
| GPR3        | 0.715302065  | 0.070222 | 0.644281292  | 0.10034 | 0.820561003  | 0.03325  |
| C3orf14     | -0.395080082 | 0.079333 | 0.05803777   | 0.78948 | -0.478870393 | 0.033281 |
| MYH10       | 0.221795634  | 0.163049 | 0.04864977   | 0.75963 | 0.33831541   | 0.033286 |
| DHX16       | -0.037628497 | 0.774646 | 0.08796608   | 0.50088 | 0.277693196  | 0.033354 |
| PRPF4B      | -0.061928131 | 0.499862 | 0.006465194  | 0.94372 | 0.194243239  | 0.033363 |
| ZNF155      | 0.099879428  | 0.634097 | 0.196785262  | 0.3451  | 0.43586569   | 0.033466 |
| B3GALNT1    | -0.110502663 | 0.606728 | -0.240921541 | 0.26045 | 0.450228172  | 0.033513 |
| GPR126      | 0.305722012  | 0.173022 | 0.059928502  | 0.78938 | 0.476296028  | 0.033681 |
| MGAT4A      | 0.360741862  | 0.211714 | -0.021550166 | 0.94054 | -0.614989562 | 0.033847 |
| TMEM147     | -0.115772258 | 0.433181 | -0.145550663 | 0.32312 | -0.313166638 | 0.033869 |
| APAF1       | -0.041426032 | 0.786463 | 0.266319385  | 0.0804  | 0.32288462   | 0.033957 |
| HECTD1      | -0.027112095 | 0.743888 | 0.161271124  | 0.05122 | 0.175337504  | 0.033977 |

|             |              |          |              |         |              |          |
|-------------|--------------|----------|--------------|---------|--------------|----------|
| DHX9        | 0.016665843  | 0.84787  | 0.104231764  | 0.22964 | 0.183760956  | 0.034084 |
| CHSY3       | 0.626134054  | 0.061028 | 0.008533211  | 0.97964 | 0.705344498  | 0.034172 |
| FUT11       | -0.146645974 | 0.33041  | -0.238542433 | 0.11308 | -0.318702192 | 0.034298 |
| NLE1        | -0.18013372  | 0.350678 | -0.24275435  | 0.20712 | -0.407071757 | 0.034279 |
| RBM23       | 0.190166415  | 0.070159 | 0.074136844  | 0.47967 | 0.221360197  | 0.034267 |
| RGS6        | 0.089353154  | 0.889727 | 0.657283118  | 0.30028 | -1.432853918 | 0.034259 |
| ZBTB5       | 0.217642118  | 0.053073 | 0.130277587  | 0.24519 | 0.235931375  | 0.034284 |
| ZNF511      | -0.169257103 | 0.199798 | -0.183060918 | 0.16294 | -0.277525306 | 0.03452  |
| LY9         | 0.081841959  | 0.779286 | 0.054593967  | 0.85181 | -0.633499041 | 0.034574 |
| C18orf21    | 0.210039524  | 0.150125 | 0.139609521  | 0.33528 | 0.30320302   | 0.034622 |
| HCFC1R1     | 0.241227083  | 0.120654 | -0.09931213  | 0.52626 | -0.332894156 | 0.034645 |
| SCHIP1      | 0.578321537  | 0.122432 | -0.36915323  | 0.32895 | 0.790027572  | 0.034702 |
| RICTOR      | -0.102629352 | 0.392701 | -0.147683248 | 0.21705 | -0.252453039 | 0.034751 |
| ABAT        | -0.065732906 | 0.674499 | -0.024627928 | 0.87444 | -0.330336231 | 0.034929 |
| HDGFP1      | 0.455537515  | 0.261212 | 0.571427893  | 0.15114 | 0.825661842  | 0.034928 |
| ITCH        | -0.108877924 | 0.48159  | 0.133996214  | 0.385   | 0.324191944  | 0.035001 |
| TMEM170B    | 0.002117127  | 0.988416 | 0.225642313  | 0.11696 | 0.30221151   | 0.035117 |
| PAF1        | 0.063491759  | 0.59492  | 0.024453983  | 0.83731 | 0.250076568  | 0.035154 |
| ZNF821      | 0.145438879  | 0.527808 | -0.178006951 | 0.43843 | 0.476796534  | 0.035352 |
| ARMCX6      | -0.25421047  | 0.082066 | -0.02151866  | 0.88175 | -0.306422775 | 0.035423 |
| UBXN1       | 0.13767988   | 0.344912 | 0.121033711  | 0.40501 | 0.304873498  | 0.035433 |
| DIMT1       | -0.017953403 | 0.878683 | 0.144280225  | 0.21605 | 0.244024757  | 0.035454 |
| ENOX1       | 0.323913361  | 0.296955 | 0.106076113  | 0.73374 | 0.648941241  | 0.035517 |
| WASH7P      | 0.717755397  | 0.087641 | 0.395301003  | 0.34733 | 0.881285694  | 0.03554  |
| AP003068.18 | 0.231317774  | 0.597708 | 0.664421243  | 0.11858 | 0.896976855  | 0.035616 |
| FAM160B1    | -0.02339202  | 0.890307 | 0.054109368  | 0.74891 | 0.354983573  | 0.035644 |
| MZT2A       | 0.085086508  | 0.702606 | -0.044776681 | 0.84059 | -0.469190786 | 0.03571  |
| TMTC4       | -0.082504977 | 0.511216 | -0.068933894 | 0.57988 | -0.26217084  | 0.035834 |
| CES4A       | -0.062142537 | 0.802012 | 0.219520104  | 0.35973 | -0.532266875 | 0.035999 |
| P11-34P13.1 | -0.340947766 | 0.454556 | -0.186125435 | 0.68089 | -0.966160806 | 0.035986 |
| SMG5        | 0.101477671  | 0.22611  | 0.084854978  | 0.31001 | 0.174833716  | 0.036067 |
| DUSP8       | 0.966915616  | 0.068846 | 0.418292623  | 0.44224 | 1.111331761  | 0.036178 |
| FGD3        | 0.084530215  | 0.906344 | -0.916355887 | 0.19498 | -1.551162856 | 0.036255 |
| PLEKHB1     | -0.634614236 | 0.082882 | -0.534553681 | 0.14283 | -0.764737399 | 0.036233 |
| C5orf22     | -0.046105823 | 0.673759 | 0.087942493  | 0.41627 | 0.225479412  | 0.036376 |
| NUP93       | 0.199097531  | 0.186366 | 0.143861868  | 0.33779 | 0.313916036  | 0.036405 |
| ATP2B1      | -0.083624166 | 0.536749 | -0.161133726 | 0.23362 | 0.282653189  | 0.036462 |
| ANKRD1      | 0.368152301  | 0.451696 | 0.071363235  | 0.88425 | 1.009788559  | 0.036633 |
| SLC35F2     | -0.16666089  | 0.334636 | -0.167592469 | 0.33044 | -0.360060796 | 0.036809 |
| AGAP1       | 0.063684133  | 0.684136 | -0.0556793   | 0.72175 | -0.329041917 | 0.036838 |
| CSNK1G1     | 0.154329215  | 0.122607 | 0.194698225  | 0.0505  | 0.207355982  | 0.03687  |
| HOXD9       | -0.24009936  | 0.737668 | -1.430941601 | 0.05042 | -1.528467077 | 0.036876 |
| FAM86A      | -0.12530669  | 0.44778  | -0.133212441 | 0.41535 | -0.341420288 | 0.036927 |
| MLLT3       | -0.399346846 | 0.161152 | 0.003913496  | 0.98902 | -0.593898457 | 0.036922 |
| HOXA10      | 0.410269113  | 0.318957 | -0.280736384 | 0.49721 | -0.868993576 | 0.036957 |
| SGSM1       | -1.11029366  | 0.100615 | -0.892547775 | 0.18511 | -1.404493952 | 0.03717  |
| KCNK3       | 0.469663635  | 0.200224 | -0.715867961 | 0.06403 | -0.807093577 | 0.037203 |

|            |              |          |              |         |              |          |
|------------|--------------|----------|--------------|---------|--------------|----------|
| TTC12      | -0.443446763 | 0.05013  | -0.355756459 | 0.11104 | -0.465608956 | 0.037195 |
| P11-396K3. | -0.098126058 | 0.510618 | 0.025840305  | 0.86218 | 0.309549002  | 0.037264 |
| TOR3A      | -0.238398886 | 0.09527  | -0.258480329 | 0.06544 | -0.292802296 | 0.03731  |
| SEPHS1     | -0.001835633 | 0.985824 | 0.077179316  | 0.45359 | 0.213779701  | 0.03738  |
| OSTM1      | 0.223912518  | 0.213986 | 0.115813569  | 0.51894 | 0.371422238  | 0.037509 |
| C11orf57   | 0.044423958  | 0.756461 | 0.112667032  | 0.42953 | 0.29602333   | 0.037563 |
| PLA2G2A    | -1.173988993 | 0.215337 | -0.211420936 | 0.82256 | -1.978328889 | 0.037628 |
| PRKAG2     | 0.266200696  | 0.262022 | 0.054140166  | 0.82021 | 0.490212607  | 0.037696 |
| METR1      | -0.021385071 | 0.947406 | -0.039186724 | 0.90369 | -0.680751275 | 0.037721 |
| HAND2      | 0.36475135   | 0.197042 | -0.114765998 | 0.68566 | 0.584197041  | 0.037765 |
| ITIH5      | 0.276849015  | 0.468953 | 0.32567898   | 0.39136 | -0.804346756 | 0.037778 |
| CSNK2A2    | 0.054552345  | 0.549981 | 0.04619862   | 0.61183 | 0.188483294  | 0.03781  |
| PAGR1      | -0.188230913 | 0.072364 | 0.002457614  | 0.98095 | -0.215182518 | 0.037918 |
| MYO9A      | -0.322181509 | 0.112555 | -0.155258549 | 0.44393 | -0.420854072 | 0.037989 |
| ZNF160     | 0.123616561  | 0.268555 | -0.065297305 | 0.559   | 0.230802258  | 0.037984 |
| PAIP2      | 0.062039338  | 0.57869  | 0.211448049  | 0.05666 | 0.22997643   | 0.038082 |
| DLAT       | -0.090809514 | 0.386152 | -0.07027176  | 0.50081 | 0.215436787  | 0.038113 |
| SWSAP1     | -0.148208919 | 0.481864 | -0.333275699 | 0.11415 | -0.438862867 | 0.03816  |
| ABHD13     | -0.1448139   | 0.109588 | 0.019787488  | 0.82375 | 0.18232521   | 0.038182 |
| POMGNT1    | -0.127516705 | 0.209981 | -0.031048779 | 0.75821 | -0.209658151 | 0.038233 |
| P11-872D17 | -1.295896532 | 0.348418 | 0.619916725  | 0.64406 | -3.090316745 | 0.038235 |
| HSPA1B     | -0.278907533 | 0.080881 | -0.2096123   | 0.18883 | -0.330587864 | 0.038308 |
| KRT13      | 0.043933634  | 0.96971  | -1.267103607 | 0.27544 | -2.446300754 | 0.038296 |
| GNG12      | -0.165154473 | 0.075211 | -0.049199072 | 0.59518 | -0.191898323 | 0.038359 |
| PRSS3      | -0.901590799 | 0.152222 | 0.307137851  | 0.59519 | -1.280083008 | 0.038551 |
| STAM       | -0.015843771 | 0.915424 | 0.068314634  | 0.64595 | 0.306899321  | 0.038519 |
| SNX13      | 0.059065964  | 0.549783 | 0.079559904  | 0.41847 | 0.203105941  | 0.038754 |
| ANKRD40    | 0.120053854  | 0.188266 | -0.070195723 | 0.44069 | 0.186861798  | 0.038797 |
| FRMPD3     | -0.115863786 | 0.79989  | -0.707228358 | 0.13823 | -0.98601412  | 0.038859 |
| FTH1       | 0.373868748  | 0.079223 | 0.362442728  | 0.08879 | 0.439915577  | 0.038851 |
| FAM49B     | -0.094444231 | 0.416976 | -0.055447694 | 0.63242 | 0.237958841  | 0.039    |
| C2orf81    | -0.73831695  | 0.143692 | -0.569805861 | 0.25752 | -1.052129572 | 0.039018 |
| MOK        | -0.160860082 | 0.378434 | -0.274461555 | 0.1292  | -0.372419212 | 0.039094 |
| KLHL35     | -0.325139403 | 0.487138 | -0.127856518 | 0.77989 | -0.974685234 | 0.039215 |
| ZKSCAN5    | 0.104891166  | 0.319166 | 0.118313698  | 0.25734 | 0.214103676  | 0.039377 |
| SHISA2     | 0.299893175  | 0.264267 | 0.250125831  | 0.3515  | 0.552233693  | 0.039424 |
| TMEM143    | -0.220128567 | 0.371962 | -0.410234436 | 0.10167 | -0.511965446 | 0.039421 |
| GORAB      | 0.089327479  | 0.540713 | 0.26341475   | 0.06723 | 0.295128939  | 0.0396   |
| KDM6A      | -0.251807601 | 0.073349 | -0.093676198 | 0.50431 | 0.287758382  | 0.039692 |
| FLVCR1     | 0.193990322  | 0.291991 | 0.265426642  | 0.14865 | 0.377559637  | 0.039871 |
| HPGD       | -0.469904474 | 0.197906 | -0.31013237  | 0.39532 | -0.75010445  | 0.039873 |
| UBQLN1     | 0.140984138  | 0.228985 | 0.14903516   | 0.20259 | 0.240213982  | 0.039906 |
| HIST2H2AC  | 0.099449979  | 0.590421 | 0.081334411  | 0.65957 | 0.378851658  | 0.039934 |
| NECAB1     | 0.089830729  | 0.706734 | -0.227746714 | 0.34074 | 0.481879828  | 0.039961 |
| ZSWIM5     | -0.139299032 | 0.494438 | -0.015497762 | 0.93872 | -0.420347362 | 0.040035 |
| FAM174A    | -0.271859667 | 0.10687  | -0.02416611  | 0.88374 | -0.344633932 | 0.040112 |
| SYCP2L     | 0.389357627  | 0.202707 | 0.276873356  | 0.36619 | 0.620951977  | 0.040104 |

|            |              |          |              |         |              |          |
|------------|--------------|----------|--------------|---------|--------------|----------|
| MYO3A      | -0.48987904  | 0.157193 | -0.132863788 | 0.693   | -0.695378126 | 0.040193 |
| FBXL2      | 0.13535166   | 0.331797 | 0.140776286  | 0.30864 | 0.282044273  | 0.040304 |
| LRN3       | 0.368491748  | 0.237361 | 0.582369547  | 0.06077 | 0.636254052  | 0.040303 |
| PAXIP1     | -0.032107652 | 0.785294 | 0.082493319  | 0.48154 | 0.238817876  | 0.040344 |
| AC016739.2 | -0.07089071  | 0.710692 | 0.012548236  | 0.9476  | -0.391839616 | 0.040404 |
| ZNF346     | -0.205155483 | 0.324945 | 0.140433134  | 0.49852 | 0.423940951  | 0.040407 |
| ZNF436     | -0.297858942 | 0.080949 | -0.152430043 | 0.37048 | -0.349059126 | 0.040508 |
| SFXN4      | -0.287264096 | 0.152663 | -0.362308447 | 0.06783 | -0.408067022 | 0.040566 |
| FASTKD5    | 0.230076694  | 0.096133 | 0.173606758  | 0.20752 | 0.280762477  | 0.040608 |
| PRKRA      | -0.094638285 | 0.341449 | -0.007214162 | 0.94157 | 0.200001866  | 0.040684 |
| ZNF140     | 0.033179615  | 0.800418 | 0.045006332  | 0.72899 | 0.264424844  | 0.040688 |
| CERS5      | 0.240460202  | 0.097447 | 0.180857576  | 0.21254 | 0.295527258  | 0.040826 |
| FAM110C    | -0.098414394 | 0.687045 | -0.069842929 | 0.77442 | -0.501784421 | 0.040819 |
| EXOSC10    | 0.10356684   | 0.139985 | -0.051224518 | 0.46386 | 0.141852771  | 0.040923 |
| ISG20L2    | 0.259547073  | 0.135331 | 0.156561702  | 0.36714 | 0.35414695   | 0.040897 |
| BRAT1      | -0.05739656  | 0.740601 | -0.039461917 | 0.81931 | -0.354548067 | 0.0411   |
| RWDD1      | -0.132390542 | 0.206125 | 0.031586134  | 0.76137 | 0.210967133  | 0.041248 |
| PPP2R3B    | 0.400448451  | 0.441114 | -0.3709206   | 0.48881 | -1.088573303 | 0.041395 |
| AMDHD2     | -0.261583302 | 0.36489  | -0.517559564 | 0.07404 | -0.592173613 | 0.041454 |
| MIF        | 0.211412649  | 0.237874 | -0.052113165 | 0.77119 | -0.36591802  | 0.041495 |
| ADNP2      | -0.09377904  | 0.465632 | 0.052749934  | 0.68013 | 0.260244683  | 0.041533 |
| ENGASE     | -0.094143311 | 0.540458 | -0.267280301 | 0.08125 | -0.313132664 | 0.041523 |
| ACOX2      | -0.2017858   | 0.58304  | -0.68409106  | 0.06286 | -0.753812976 | 0.041605 |
| EIF4A1P2   | 0.116380748  | 0.925162 | -0.303644093 | 0.80667 | -2.622404023 | 0.041577 |
| ASMTL      | -0.192796258 | 0.355182 | -0.021319232 | 0.91743 | -0.423321311 | 0.041806 |
| FOXD4L5    | -0.143461698 | 0.756909 | -0.121166288 | 0.79135 | -0.98708937  | 0.041801 |
| MROH6      | 0.18056506   | 0.613755 | -0.111114854 | 0.76291 | -0.746706209 | 0.041837 |
| G0S2       | 0.098937627  | 0.7944   | 0.079717815  | 0.83291 | -0.791220583 | 0.041905 |
| CNOT1      | 0.269008237  | 0.085398 | 0.143338884  | 0.35927 | 0.317859648  | 0.04201  |
| TSPAN1     | 0.019264238  | 0.924302 | 0.217687733  | 0.28247 | -0.41238297  | 0.042057 |
| SNAP91     | 1.035891715  | 0.12333  | -0.04530598  | 0.95005 | 1.378861993  | 0.042166 |
| RPS5       | -0.191700584 | 0.119278 | -0.2084963   | 0.09006 | -0.249757822 | 0.042299 |
| C21orf2    | -0.023801483 | 0.850496 | -0.036056235 | 0.77468 | -0.257133911 | 0.042363 |
| RCOR3      | -0.237407599 | 0.089958 | -0.238189384 | 0.08702 | -0.281992922 | 0.042418 |
| QTRT1      | -0.021797219 | 0.898974 | -0.179980393 | 0.29348 | -0.348483181 | 0.042484 |
| P11-206L10 | -0.271757714 | 0.621423 | -0.405183162 | 0.4612  | -1.128430385 | 0.042533 |
| ZNF586     | -0.198682342 | 0.079311 | -0.160803528 | 0.14835 | -0.225127175 | 0.042582 |
| SPIB       | 0.324079396  | 0.448536 | 0.263331131  | 0.53691 | 0.859049476  | 0.042709 |
| HIPK3      | 0.140072204  | 0.087196 | 0.100531504  | 0.21883 | 0.165412079  | 0.042853 |
| KIAA1551   | -0.022489124 | 0.936794 | 0.046535061  | 0.86965 | 0.574075587  | 0.042794 |
| LEPROTL1   | 0.124554173  | 0.480976 | 0.19398789   | 0.27112 | 0.35653957   | 0.04284  |
| RAB18      | 0.00312499   | 0.975019 | 0.08202291   | 0.41039 | 0.200747799  | 0.042843 |
| ZNF669     | 0.013366901  | 0.917868 | 0.088480157  | 0.48592 | 0.253196187  | 0.042925 |
| SLC35B3    | -0.180930397 | 0.11367  | 0.21018788   | 0.05856 | -0.228971688 | 0.043047 |
| FCER1G     | 0.221265756  | 0.751464 | -0.733930277 | 0.29659 | 1.405582511  | 0.043091 |
| DHX38      | 0.040937935  | 0.790192 | -0.138266405 | 0.36836 | 0.310416219  | 0.043161 |
| TMEM201    | 0.087370046  | 0.683082 | -0.248961333 | 0.2475  | -0.436152844 | 0.043131 |



|          |              |          |              |         |              |          |
|----------|--------------|----------|--------------|---------|--------------|----------|
| TSTD2    | 0.252910056  | 0.081858 | 0.078070969  | 0.59007 | 0.292091497  | 0.043139 |
| SLC12A9  | -0.087635043 | 0.578652 | -0.047892756 | 0.75991 | -0.31835114  | 0.043208 |
| USP21    | 0.116690412  | 0.471626 | -0.106616088 | 0.5099  | -0.328475286 | 0.04334  |
| ATIC     | -0.360610699 | 0.165663 | -0.322852346 | 0.21342 | -0.524792532 | 0.043593 |
| C12orf60 | -0.45831541  | 0.085854 | -0.36891368  | 0.16619 | -0.533773766 | 0.043579 |
| CNOT7    | 0.016825336  | 0.888056 | 0.072110014  | 0.54539 | 0.240334751  | 0.043562 |
| MAN2A1   | -0.264681615 | 0.053557 | -0.060422878 | 0.6589  | -0.276399122 | 0.043582 |
| MXI1     | -0.322897381 | 0.296537 | -0.411902024 | 0.18277 | -0.624456472 | 0.043548 |
| WDR36    | -0.050121235 | 0.715594 | -0.064453831 | 0.63791 | 0.274023794  | 0.043597 |
| C7orf50  | -0.287680624 | 0.111182 | -0.193141207 | 0.28326 | -0.363013418 | 0.043642 |
| CCDC85B  | 0.262469202  | 0.498839 | -0.525669936 | 0.19258 | -0.829324937 | 0.043744 |
| IGSF8    | -1.143409792 | 0.092088 | -0.134892799 | 0.8405  | -1.364884034 | 0.043853 |
| KBTBD2   | 0.078822577  | 0.493752 | 0.144067493  | 0.20843 | 0.230596305  | 0.043896 |
| HHAT     | -0.47944864  | 0.075074 | -0.103657253 | 0.69524 | -0.541677116 | 0.043937 |
| PSD4     | -0.187652506 | 0.242384 | -0.050342436 | 0.75271 | -0.323201223 | 0.044006 |
| CNGA1    | -0.136805243 | 0.740042 | 0.198287892  | 0.6267  | -0.834652711 | 0.044179 |
| PSMB4    | 0.083821449  | 0.315482 | 0.088002972  | 0.28998 | 0.167057991  | 0.044194 |
| FFAR2    | 0.448586356  | 0.261734 | 0.414964412  | 0.29524 | 0.795432921  | 0.044237 |
| COX18    | -0.181796784 | 0.173597 | -0.034625006 | 0.79331 | -0.26638009  | 0.044422 |
| SLMO2    | 0.006445388  | 0.951873 | 0.13310424   | 0.21051 | 0.213397486  | 0.044428 |
| HABP4    | -0.026400852 | 0.849159 | 0.012710631  | 0.92617 | 0.271589205  | 0.044479 |
| TMEM91   | -0.441737798 | 0.174174 | 0.070939769  | 0.82311 | -0.649861693 | 0.044464 |
| CARD10   | -0.319259796 | 0.058759 | -0.152393698 | 0.36582 | -0.339843907 | 0.044518 |
| GTF2A2   | -0.131142522 | 0.24553  | 0.139024976  | 0.21415 | 0.223914599  | 0.044565 |
| MRPS12   | -0.151097779 | 0.313108 | -0.072824642 | 0.62253 | -0.298968391 | 0.044733 |
| MUC12    | -0.519234586 | 0.212442 | -0.274142476 | 0.49766 | -0.829287979 | 0.044852 |
| C22orf29 | -0.153839345 | 0.229174 | -0.056907323 | 0.65347 | -0.254591093 | 0.044911 |
| PABPC4L  | 0.061933327  | 0.824057 | 0.107152221  | 0.69853 | 0.548240931  | 0.044946 |
| RRAGA    | 0.103908051  | 0.304005 | 0.191510848  | 0.05563 | 0.200197936  | 0.044961 |
| MAP4K3   | -0.006144407 | 0.949677 | -0.146657985 | 0.13121 | 0.193794823  | 0.045151 |
| VWA1     | 0.012720478  | 0.939746 | -0.122592531 | 0.46602 | -0.337340742 | 0.045183 |
| FAM86B3P | 0.036513145  | 0.882475 | -0.311391713 | 0.2087  | -0.494970472 | 0.045263 |
| IL6R     | 0.462728818  | 0.246986 | -0.408679869 | 0.30884 | 0.792331775  | 0.045342 |
| MRPL41   | 0.21860009   | 0.193563 | 0.022306266  | 0.89456 | -0.343137016 | 0.045324 |
| SREK1IP1 | 0.283073263  | 0.084901 | 0.066310881  | 0.68531 | 0.32683891   | 0.045345 |
| PDE4C    | -0.170098598 | 0.415337 | -0.254440281 | 0.22398 | -0.418384851 | 0.045596 |
| EYA2     | 1.002442474  | 0.229674 | 0.32127937   | 0.70095 | -1.727898962 | 0.045769 |
| NDRG2    | 0.032724535  | 0.870572 | 0.020860166  | 0.91715 | -0.402284459 | 0.045779 |
| MT1X     | -0.013213911 | 0.984855 | -0.449464496 | 0.51906 | -1.403950467 | 0.045808 |
| EFCAB6   | 0.075367606  | 0.748525 | 0.102737625  | 0.65616 | -0.469947789 | 0.045861 |
| TG       | 1.169877565  | 0.066936 | 1.198928107  | 0.05766 | 1.268051455  | 0.045951 |
| ATP8B5P  | -0.734346911 | 0.150723 | 0.237800533  | 0.62039 | -1.055099566 | 0.046135 |
| PYCR1    | -0.014053971 | 0.915923 | 0.015743841  | 0.9056  | -0.265317676 | 0.046142 |
| LAMB1    | -0.157691121 | 0.325538 | 0.008186987  | 0.95928 | -0.319744287 | 0.046246 |
| RCN1P2   | 0.275855399  | 0.065588 | 0.220904055  | 0.13826 | 0.295483777  | 0.04628  |
| PYCARD   | -0.115800846 | 0.663167 | -0.05765397  | 0.825   | -0.539153887 | 0.046327 |
| DENND4A  | 0.042105786  | 0.778051 | 0.001357906  | 0.99273 | 0.295964228  | 0.046667 |

|         |              |          |              |         |              |          |
|---------|--------------|----------|--------------|---------|--------------|----------|
| OPRK1   | -0.127123706 | 0.678002 | 0.071905492  | 0.81406 | -0.609403499 | 0.046883 |
| TPM3    | 0.142916653  | 0.247417 | 0.123339602  | 0.31797 | 0.245383779  | 0.046873 |
| P4HTM   | -0.267543224 | 0.107315 | -0.275811262 | 0.09649 | -0.329917591 | 0.046956 |
| SLC1A2  | 0.381967861  | 0.462713 | 0.858892134  | 0.09003 | 1.018982594  | 0.047013 |
| PPP1CB  | 0.035153729  | 0.678509 | 0.035962107  | 0.67108 | 0.168014448  | 0.04706  |
| GLIS3   | 0.383996242  | 0.107577 | 0.145427551  | 0.54214 | 0.473165267  | 0.047082 |
| CLK2    | 0.159080832  | 0.091884 | -0.01558306  | 0.86883 | 0.185830749  | 0.047143 |
| PVRL3   | -0.140103083 | 0.270008 | 0.069972986  | 0.5775  | -0.250240139 | 0.04717  |
| DRG1    | 0.06086674   | 0.534511 | 0.041792135  | 0.66641 | 0.191153829  | 0.047307 |
| ZDHHC16 | -0.003947633 | 0.964983 | 0.066726152  | 0.45277 | 0.175307308  | 0.047356 |
| ZNF17   | 0.109011491  | 0.430817 | 0.249238119  | 0.0647  | 0.266023616  | 0.047373 |
| ZNF398  | 0.097458399  | 0.416316 | -0.124632832 | 0.29666 | 0.235106946  | 0.047372 |
| MZT2B   | 0.089261583  | 0.724351 | -0.060505886 | 0.81087 | -0.503510151 | 0.04748  |
| RNASE4  | -0.342277037 | 0.082612 | -0.297613022 | 0.13032 | -0.389678518 | 0.04758  |
| TPP2    | -0.292217037 | 0.081492 | 0.036001594  | 0.82965 | 0.330806652  | 0.047798 |
| FAM115C | -0.032475287 | 0.882179 | -0.066367283 | 0.76122 | -0.434967772 | 0.047837 |
| COPS7A  | -0.196093588 | 0.09699  | -0.034182992 | 0.76882 | -0.231281452 | 0.04789  |
| MPST    | -0.031883371 | 0.846027 | -0.080124172 | 0.62495 | -0.324574789 | 0.04801  |
| SMPD3   | -0.243147002 | 0.494546 | -0.325801236 | 0.35899 | -0.703495005 | 0.048053 |
| MON1A   | -0.112870924 | 0.627662 | -0.203306471 | 0.37741 | -0.457946468 | 0.048088 |
| GSTO2   | -0.422987939 | 0.145718 | -0.481333432 | 0.09588 | -0.57390277  | 0.04813  |
| AREG    | 0.342821721  | 0.532075 | 0.429770423  | 0.4327  | 1.078143198  | 0.048317 |
| AQP1    | -0.032962497 | 0.95197  | -0.573554254 | 0.2976  | -1.104184939 | 0.048393 |
| SEC23A  | -0.060884884 | 0.584223 | -0.029403745 | 0.79125 | 0.218920724  | 0.048443 |
| PAPOLA  | 0.065051334  | 0.42291  | 0.025317307  | 0.7547  | 0.159695571  | 0.048528 |
| CEP89   | 0.16452643   | 0.282284 | 0.015025635  | 0.92157 | 0.299883042  | 0.048562 |
| ZNF473  | 0.049766747  | 0.686271 | 0.050667755  | 0.6776  | 0.237972921  | 0.048658 |
| WDR89   | -0.661011724 | 0.064407 | 0.268160887  | 0.44377 | -0.703871184 | 0.048701 |
| WDR18   | -0.012946026 | 0.952235 | -0.045911008 | 0.8313  | -0.427702541 | 0.048755 |
| RBFOX2  | 0.034969802  | 0.821773 | 0.089301464  | 0.56482 | 0.305015858  | 0.048916 |
| CLINT1  | 0.184036582  | 0.130019 | 0.209338564  | 0.08481 | 0.239064705  | 0.049024 |
| ICK     | -0.281671693 | 0.05028  | -0.269454538 | 0.06064 | -0.282499124 | 0.049113 |
| NUP98   | 0.167463311  | 0.119293 | 0.162743297  | 0.12964 | 0.211132844  | 0.049041 |
| SMIM22  | -0.240508181 | 0.197739 | -0.169052276 | 0.36187 | -0.366456346 | 0.049096 |
| SPATS2  | 0.086699389  | 0.616736 | 0.017391775  | 0.91979 | 0.33885322   | 0.049092 |
| VEZF1   | 0.06192943   | 0.47472  | -0.073744863 | 0.39361 | 0.169143864  | 0.049157 |
| CCT3    | -0.01113909  | 0.920057 | 0.121647361  | 0.27227 | 0.217775923  | 0.049244 |
| YY1AP1  | 0.060914982  | 0.60744  | 0.015827376  | 0.89388 | -0.232678311 | 0.0492   |
| BAK1    | 0.201021964  | 0.135128 | 0.090628324  | 0.49896 | 0.260407569  | 0.049286 |
| RABL6   | 0.012956388  | 0.887294 | -0.071455068 | 0.43368 | -0.17966766  | 0.049395 |
| LEPREL2 | -0.144112294 | 0.660934 | -0.016863641 | 0.95902 | -0.647145703 | 0.049463 |
| UBXN4   | -0.044650208 | 0.488068 | 0.066352069  | 0.29968 | 0.125496354  | 0.049465 |
| DEAF1   | 0.011942611  | 0.919318 | -0.13524415  | 0.25105 | -0.231355319 | 0.049653 |
| UAP1L1  | -0.037271668 | 0.881608 | -0.036757138 | 0.88235 | -0.496901507 | 0.049736 |
| YTHDC1  | -0.031795583 | 0.729312 | -0.016805295 | 0.85386 | 0.178119658  | 0.049695 |
| VKORC1  | -0.15673878  | 0.298935 | -0.104574971 | 0.4865  | -0.295719282 | 0.049823 |
| HOXA1   | 0.55234865   | 0.162576 | -0.199511654 | 0.62295 | 0.764626194  | 0.049844 |

|             |              |          |              |         |              |          |
|-------------|--------------|----------|--------------|---------|--------------|----------|
| LRP2BP      | 0.376085273  | 0.067016 | -0.079876822 | 0.69959 | 0.399610662  | 0.049948 |
| OGFOD3      | -0.114512506 | 0.436575 | -0.201205471 | 0.1688  | -0.286593801 | 0.049937 |
| REST        | 0.347554776  | 0.177746 | 0.312659796  | 0.22507 | 0.50458199   | 0.049955 |
| AC007875.2  | -0.257977093 | 0.705753 | -0.966012982 | 0.17851 | -3.218842594 | 0.001832 |
| AC007881.4  | -1.001413181 | 0.544005 | -1.716339938 | 0.30225 | -6.07641449  | 0.001502 |
| AC007969.5  | -0.385431295 | 0.688124 | -0.032001774 | 0.97247 | -3.702298575 | 0.005251 |
| AC073551.1  | -0.65702208  | 0.21714  | -0.888273895 | 0.09775 | -1.134612504 | 0.038515 |
| AC098614.1  | -0.945716445 | 0.266917 | -1.290533568 | 0.13895 | -2.192799545 | 0.027692 |
| AC104451.2  | -1.644624845 | 0.0623   | -1.557306906 | 0.06527 | -1.895323413 | 0.032175 |
| AC124914.3  | -0.108710695 | 0.855644 | -0.311823346 | 0.6027  | -1.600808268 | 0.019576 |
| AC239811.1  | -0.907094259 | 0.160956 | 0.319300768  | 0.59473 | -1.369253533 | 0.037134 |
| ACRBP       | -0.908083148 | 0.200801 | -0.555379521 | 0.43953 | -1.518783849 | 0.04077  |
| AKR1B10P1   | -1.652294868 | 0.138413 | -1.784359419 | 0.10823 | -4.191764655 | 0.002592 |
| AQP5        | -0.526345291 | 0.596754 | -1.949369447 | 0.06433 | -3.211933455 | 0.007106 |
| ASB9P1      | -0.133037747 | 0.903016 | -0.911927271 | 0.43607 | -2.702297034 | 0.049513 |
| ASCL1       | 1.577528137  | 0.254424 | 0.653661133  | 0.64626 | 3.346215388  | 0.012391 |
| ASIC4       | 0.586103805  | 0.286389 | 0.332381736  | 0.54507 | 1.153825481  | 0.029825 |
| BMS1P3      | -0.451744709 | 0.772458 | -0.540172971 | 0.72816 | -3.429632141 | 0.049778 |
| BMS1P9      | -0.062718055 | 0.940139 | -1.487169257 | 0.08775 | -1.953290982 | 0.028304 |
| C1orf110    | -0.050743162 | 0.96075  | -1.494455212 | 0.16561 | -3.519676204 | 0.006267 |
| C1orf53     | -0.136850362 | 0.79663  | -0.05315947  | 0.91705 | -1.193448755 | 0.032607 |
| C3orf55     | 0.32720945   | 0.694379 | 0.832005097  | 0.29632 | 1.938284156  | 0.011276 |
| C5orf38     | -0.824318891 | 0.402389 | -0.113039349 | 0.90372 | -2.570438643 | 0.018465 |
| C8orf44-SGK | -0.88637593  | 0.691377 | -1.18516772  | 0.59413 | -5.965619264 | 0.013991 |
| CCDC135     | -0.477747148 | 0.445906 | 0.101602435  | 0.8684  | -1.257094674 | 0.0483   |
| CCER2       | -1.141201459 | 0.209535 | -1.493534513 | 0.12215 | -2.343057973 | 0.038898 |
| CCKBR       | -1.033538294 | 0.259831 | -1.405674662 | 0.10389 | -1.885776589 | 0.034681 |
| CCL21       | 2.882502244  | 0.058836 | 1.30351372   | 0.43429 | 3.265314375  | 0.029443 |
| CCNJP2      | -0.383086786 | 0.558273 | -0.57165659  | 0.38288 | -1.506872488 | 0.034302 |
| CCNO        | 0.265407219  | 0.767877 | 0.200159378  | 0.82282 | -2.193881879 | 0.029971 |
| CD86        | -1.906380854 | 0.240634 | -0.853600358 | 0.58011 | -3.567799049 | 0.039147 |
| CDC42P2     | -1.525454692 | 0.156681 | -1.206281763 | 0.24067 | -4.017195488 | 0.003075 |
| CDHR4       | -0.923399893 | 0.115126 | -1.164315686 | 0.05084 | -1.255587454 | 0.033995 |
| CERS3       | 0.604906251  | 0.630018 | -0.167866546 | 0.89794 | -3.316784556 | 0.031649 |
| CHADL       | 0.34173819   | 0.688197 | -0.022920168 | 0.97696 | -2.432990374 | 0.016584 |
| CPA5        | 0.99808104   | 0.577154 | 2.177818761  | 0.17073 | 3.339804346  | 0.033786 |
| CPNE4       | -1.380127067 | 0.168653 | -0.403861111 | 0.67518 | -2.341134991 | 0.030325 |
| CSNK1A1P1   | -0.310291822 | 0.633011 | -0.472606109 | 0.43276 | -1.676436017 | 0.011511 |
| CTRL        | 1.486866497  | 0.112775 | -0.514309316 | 0.63399 | -3.63782748  | 0.007065 |
| CYP3A4      | -0.952760069 | 0.181554 | -1.209953099 | 0.07968 | -1.533887316 | 0.031931 |
| DDX50P2     | -2.429336687 | 0.070543 | -1.277082308 | 0.25467 | -4.114808882 | 0.002716 |
| DND1        | 4.09684842   | 0.133865 | 1.932487683  | 0.49389 | 5.539346952  | 0.041022 |
| DNER        | 1.443540301  | 0.080105 | 1.189958453  | 0.15488 | 2.153681293  | 0.007763 |
| ELAVL3      | 1.441271622  | 0.202601 | 1.995030702  | 0.07466 | 2.663124623  | 0.015923 |
| ELAVL4      | 0.554861177  | 0.777856 | -0.715951131 | 0.72828 | 3.701348944  | 0.045593 |
| ENHO        | -0.797078535 | 0.472049 | -0.458719402 | 0.66257 | -3.785163161 | 0.005395 |
| EVX1        | -0.086068551 | 0.922772 | -1.492107725 | 0.12031 | -4.114449022 | 0.00157  |

|             |              |          |              |         |              |          |
|-------------|--------------|----------|--------------|---------|--------------|----------|
| FAM155B     | -0.324842613 | 0.576665 | -0.220813674 | 0.69954 | -1.234130964 | 0.0442   |
| FAM204BP    | -0.641046581 | 0.474744 | -1.645370115 | 0.08558 | -2.289971242 | 0.024848 |
| FAM90A2P    | -0.935758222 | 0.366924 | -0.706962326 | 0.48583 | -2.513168887 | 0.031442 |
| FBXL16      | -0.974711546 | 0.255203 | -0.844067461 | 0.3159  | -2.323676245 | 0.018215 |
| FDPSP3      | 2.067985181  | 0.121205 | 2.205086515  | 0.09099 | 2.505537465  | 0.049326 |
| FREM3       | -1.443609471 | 0.268427 | -0.469972719 | 0.71395 | -3.314744386 | 0.01519  |
| GABRB3      | 0.860330787  | 0.430402 | 1.483620371  | 0.16936 | 2.264559302  | 0.032288 |
| GAPDHP52    | -0.628387142 | 0.607516 | 0.190563782  | 0.8593  | -2.8787296   | 0.034012 |
| GAPDHP65    | -1.062706934 | 0.299501 | -0.470349025 | 0.62552 | -3.105323629 | 0.017579 |
| GBP1P1      | 0.470496822  | 0.469787 | 1.029452708  | 0.09951 | 1.396914296  | 0.020828 |
| GRIN1       | -0.233976858 | 0.852282 | -0.83581755  | 0.52581 | -3.023307866 | 0.032591 |
| GUCA2B      | 3.085020036  | 0.05934  | 0.827915969  | 0.63738 | 3.490190411  | 0.03141  |
| HCG22       | 2.065134414  | 0.174586 | -0.117831431 | 0.94511 | 3.691525975  | 0.009163 |
| HMGB2P1     | 2.145833218  | 0.120521 | -0.839178054 | 0.59927 | 2.805963805  | 0.032704 |
| HPGDS       | -2.057124436 | 0.120581 | -0.744759614 | 0.49336 | -3.234665777 | 0.019391 |
| HSPB9       | -0.326220897 | 0.61042  | 0.149754981  | 0.80086 | -1.669607329 | 0.030401 |
| IFNW1       | -0.400612967 | 0.595514 | -1.20678677  | 0.1354  | -2.118017482 | 0.02067  |
| KB-1205A7.1 | 1.330057032  | 0.339693 | 1.452211313  | 0.2874  | 2.716467902  | 0.034627 |
| KIF5A       | 1.812607523  | 0.107834 | 1.727512975  | 0.12054 | 3.527825339  | 0.001139 |
| KRT18P21    | 0.052796792  | 0.976016 | 0.603514986  | 0.7311  | 3.076322527  | 0.044318 |
| LGALS7      | 1.585045965  | 0.141111 | -1.095505709 | 0.38418 | -2.865681655 | 0.047937 |
| LIPM        | 0.639571546  | 0.241607 | 0.596799049  | 0.26959 | 1.07920612   | 0.037099 |
| LY6D        | 0.199619458  | 0.870989 | -0.015415461 | 0.99018 | -3.884505749 | 0.011434 |
| LY6G6E      | -1.166619824 | 0.391453 | -0.728295047 | 0.57295 | -3.089707897 | 0.044449 |
| LYVE1       | -0.61144631  | 0.490008 | -0.229792566 | 0.79263 | -1.847598197 | 0.049857 |
| MIA-RAB4B   | -1.062023591 | 0.494036 | -0.139378264 | 0.92481 | -4.016974584 | 0.020803 |
| MOGAT1      | 0.862287294  | 0.25106  | 0.432146108  | 0.57047 | 1.851615653  | 0.010048 |
| MRPL53P1    | -0.119823166 | 0.891714 | -0.258122217 | 0.76872 | -2.36542013  | 0.039034 |
| NOTUM       | -0.020272392 | 0.975115 | -0.829542036 | 0.21338 | -1.739833952 | 0.015681 |
| NPM1P34     | -0.839237263 | 0.56524  | -1.935859225 | 0.22914 | -3.453956789 | 0.033045 |
| NPM1P39     | 0.401898727  | 0.749851 | 2.029477717  | 0.06392 | 2.496205837  | 0.019993 |
| NRN1        | -0.379037894 | 0.789917 | -0.44593802  | 0.7513  | -4.038454679 | 0.017323 |
| OR2A42      | 0.610546784  | 0.48622  | 0.285311496  | 0.74771 | 1.788563781  | 0.028776 |
| OR52N1      | 1.500221452  | 0.078909 | 0.618110567  | 0.48165 | 2.483778784  | 0.002791 |
| OR52N4      | 0.912432774  | 0.318337 | 1.469570035  | 0.09792 | 2.132050403  | 0.014484 |
| OR52N5      | 1.157349271  | 0.240485 | 0.795620388  | 0.42439 | 2.513334411  | 0.007245 |
| OR56B1      | 2.864622931  | 0.094835 | 1.854079076  | 0.28846 | 3.666034091  | 0.030401 |
| OR7A19P     | -1.027727906 | 0.32861  | -0.864289178 | 0.39192 | -2.551814519 | 0.04665  |
| OTOF        | -1.02592645  | 0.106047 | -0.307383933 | 0.6132  | -1.710806867 | 0.010419 |
| PCDH8       | -0.889663275 | 0.415889 | -1.850420157 | 0.11281 | -3.260363529 | 0.018351 |
| PHOX2B      | 3.723866131  | 0.153424 | 1.180632598  | 0.66906 | 5.622341985  | 0.029299 |
| PHYHIP      | -0.930947297 | 0.282406 | 0.07222577   | 0.92826 | -2.382947853 | 0.020712 |
| PMCHL1      | -0.61561706  | 0.339965 | -0.213764233 | 0.73364 | -1.76016054  | 0.010278 |
| PSMC1P9     | -1.430403828 | 0.094751 | -0.904382497 | 0.26164 | -2.067815818 | 0.020997 |
| RBM24       | 2.38502737   | 0.06173  | 1.647984272  | 0.20068 | 2.815318455  | 0.02361  |
| RET         | 1.444995719  | 0.219114 | 0.862559102  | 0.47005 | 3.460368579  | 0.002054 |
| RNF224      | -0.699354362 | 0.139837 | 0.05776164   | 0.89204 | -1.272944961 | 0.010664 |

|             |              |          |              |         |              |          |
|-------------|--------------|----------|--------------|---------|--------------|----------|
| P11-162A23  | -1.92414012  | 0.159802 | -0.483255359 | 0.68278 | -3.432787797 | 0.020828 |
| P11-169K16  | 1.289870539  | 0.370271 | 2.266567601  | 0.0944  | 2.621954848  | 0.049872 |
| P11-182I10. | 1.348413851  | 0.367208 | 1.602993502  | 0.26439 | 2.877062184  | 0.029589 |
| P11-236F9.  | -1.324324846 | 0.098263 | -1.275883925 | 0.11811 | -1.642360561 | 0.039463 |
| P11-302B13  | 1.137772607  | 0.281251 | 1.511753713  | 0.14038 | 1.988915599  | 0.047643 |
| P11-323I15. | 0.397160408  | 0.750164 | -1.590255166 | 0.29123 | -3.090077211 | 0.041522 |
| P11-325O24  | -1.444358941 | 0.109614 | 0.089123243  | 0.91527 | -1.785648544 | 0.049613 |
| P11-355O1.  | -0.046903758 | 0.947697 | -0.995855215 | 0.19439 | -1.754844093 | 0.036328 |
| P11-403P13  | -0.958969256 | 0.086936 | -0.107252613 | 0.82985 | -1.339186708 | 0.019245 |
| P11-430L17  | 0.883910315  | 0.188123 | 0.455823956  | 0.50801 | 1.362452538  | 0.03253  |
| P11-436M15  | 0.504641972  | 0.500549 | -1.554160755 | 0.08454 | -2.232827381 | 0.024843 |
| P11-445J14  | -1.185983027 | 0.197835 | -0.938836025 | 0.29122 | -1.997057123 | 0.041323 |
| P11-512H23  | -0.293814378 | 0.54141  | -0.759314763 | 0.12521 | -1.214673593 | 0.018968 |
| P11-536L3.  | -0.020983876 | 0.97844  | 0.780281033  | 0.27383 | 1.394589697  | 0.042241 |
| P11-561C5.  | -0.284198138 | 0.879483 | -0.463098438 | 0.80453 | -4.275279053 | 0.040893 |
| P11-569G9.  | 1.159628792  | 0.202604 | 1.250711304  | 0.16128 | 1.87311747   | 0.02907  |
| P11-676M6.  | -0.57158756  | 0.70521  | 0.867945101  | 0.55185 | -4.445619536 | 0.011491 |
| P11-677M14  | -1.150706172 | 0.128139 | -1.033685492 | 0.15737 | -1.678752293 | 0.032894 |
| P11-718B12  | 2.667074507  | 0.059017 | 1.896529169  | 0.19477 | 3.088589455  | 0.024793 |
| P11-82K18.  | 2.481535862  | 0.128403 | -0.117831404 | 0.94893 | 3.475809422  | 0.027322 |
| P11-87N24.  | -1.402448251 | 0.233688 | -1.106468686 | 0.32654 | -2.989700333 | 0.031987 |
| P11-894J14  | -1.515600627 | 0.145726 | -0.067160633 | 0.94471 | -2.121715621 | 0.049005 |
| P4-583P15.1 | -2.169403349 | 0.202633 | -0.35734775  | 0.81044 | -3.922203629 | 0.023773 |
| RPEP3       | 0.863424964  | 0.476845 | 0.957410525  | 0.41944 | 2.235843249  | 0.040975 |
| RPL29P25    | -0.319284618 | 0.564829 | -0.998177533 | 0.08606 | -1.369209496 | 0.022895 |
| RPL5P24     | -1.083919276 | 0.076844 | -0.954915368 | 0.10778 | -1.27953733  | 0.035919 |
| RPL5P30     | 0.75528691   | 0.19789  | 1.042438732  | 0.06506 | 1.410661656  | 0.010231 |
| RPS24P13    | 0.052796806  | 0.973693 | 2.176773603  | 0.11162 | 2.6118185    | 0.049608 |
| RPS3AP49    | -0.84193013  | 0.366009 | 0.41139233   | 0.59534 | 1.477468814  | 0.039028 |
| RTP4        | 0.003481883  | 0.997585 | 0.658326632  | 0.52969 | 2.122357343  | 0.025471 |
| SETP17      | 2.284554408  | 0.150457 | 1.200364307  | 0.47673 | 3.006116686  | 0.049751 |
| SH2D2A      | -0.406964755 | 0.479884 | -0.219168048 | 0.70178 | -1.711290875 | 0.007336 |
| SHD         | 1.899445277  | 0.104002 | -0.004685753 | 0.99717 | 2.460986358  | 0.031223 |
| SLC16A11    | 0.985495888  | 0.088956 | 0.066313032  | 0.91294 | -1.352005032 | 0.041644 |
| SLC22A31    | 2.191512876  | 0.110888 | 1.705192194  | 0.22127 | 2.658237773  | 0.047193 |
| SLC35F3     | -0.306871871 | 0.727158 | -0.638923187 | 0.4725  | -3.357519418 | 0.007632 |
| SLC35F4     | -1.372651817 | 0.093383 | -0.309786295 | 0.68653 | -2.32054747  | 0.004556 |
| SMIM1       | 0.096672929  | 0.835782 | -0.373980831 | 0.43528 | -1.194337568 | 0.026944 |
| TATDN2P3    | -0.763874019 | 0.483776 | -0.561775153 | 0.59605 | -3.553061519 | 0.010699 |
| TEKT3       | 0.583462745  | 0.348843 | 0.798465555  | 0.19564 | 1.332583569  | 0.025059 |
| TFAP2B      | -1.609351003 | 0.316911 | -2.304974308 | 0.15551 | -5.830689834 | 0.0018   |
| TMEM63C     | 0.22250749   | 0.82693  | 0.293623159  | 0.77719 | -2.884632598 | 0.015902 |
| TMIE        | 2.545903642  | 0.061969 | 0.594688815  | 0.7106  | 3.230347512  | 0.013714 |
| TSPYL5      | -2.602924592 | 0.050106 | -1.292175279 | 0.26702 | -4.980204765 | 0.000715 |
| TLL2        | -0.980655491 | 0.13034  | -0.787989343 | 0.20766 | -1.472649024 | 0.026235 |
| TUBBP6      | -1.03629098  | 0.171362 | -1.058114226 | 0.15875 | -2.252284808 | 0.005941 |
| UBE2L4      | -0.531828841 | 0.373535 | -0.987811285 | 0.10508 | -1.74349064  | 0.007224 |

|        |              |          |              |         |              |          |
|--------|--------------|----------|--------------|---------|--------------|----------|
| VIP    | 1.044781663  | 0.608321 | -0.153142759 | 0.94342 | 4.32517759   | 0.024691 |
| VIT    | 0.070779789  | 0.947834 | 0.631766422  | 0.55441 | -3.160695235 | 0.013528 |
| VWF    | -1.050695793 | 0.253147 | -1.055800971 | 0.2519  | -2.661062285 | 0.005304 |
| WEE2   | -0.025410718 | 0.977267 | -1.172393661 | 0.20374 | -2.113152753 | 0.029986 |
| WISP2  | -0.155696295 | 0.732472 | 0.188100717  | 0.66341 | -1.0921566   | 0.025188 |
| XCR1   | 0.790544525  | 0.516638 | 0.140566663  | 0.91028 | -3.059429973 | 0.017843 |
| YBX1P7 | -0.551987509 | 0.482979 | -1.540237189 | 0.06701 | -2.633034604 | 0.005983 |

**Table S2. DEGs of STM, T3SS-1<sup>mut</sup> and T3SS-2<sup>mut</sup>-infected HIOs at 8h relative to PBS-injected HIOs.** Significant DEGs ( $p < 0.05$ ) in at least one infection condition are listed.
