# Supplementary material for: Salmonella enterica Serovar Typhimurium SPI-1 and SPI-2 Shape the Global Transcriptional Landscape in a Human Intestinal Organoid Model System
Source: PubMed Central journal article supplement (PMC8262845; doi:10.1128/mbio.00399-21), 2021-05-18
Supplement: mbio.00399-21-st004.pdf [file mbio.00399-21-st004.pdf]

**Table S4A: Reactome Pathways Upregulated 8h pi**

| Description                                                                  | STM        |          | T3SS-1 <sup>mut</sup> |          | T3SS-2 <sup>mut</sup> |          |
|------------------------------------------------------------------------------|------------|----------|-----------------------|----------|-----------------------|----------|
|                                                                              | gene ratio | p-value  | gene ratio            | p-value  | gene ratio            | p-value  |
| Cytokine Signaling in Immune system                                          | 0.2688953  | 2.58E-28 | 0.206395              | 9.42E-25 | 0.22093               | 2.95E-23 |
| Signaling by Interleukins                                                    | 0.2835498  | 2.67E-22 | 0.218615              | 1.60E-19 | 0.238095              | 1.74E-19 |
| Interleukin-4 and Interleukin-13 signaling                                   | 0.3888889  | 7.97E-13 | 0.314815              | 7.30E-12 | 0.277778              | 8.97E-08 |
| Extracellular matrix organization                                            | 0.2392027  | 4.99E-09 | 0.192691              | 2.27E-09 | 0.099668              | 0.49371  |
| Toll Like Receptor 3 (TLR3) Cascade                                          | 0.3333333  | 2.17E-08 | 0.20202               | 0.00022  | 0.252525              | 6.95E-06 |
| MyD88-independent TLR4 cascade                                               | 0.33       | 2.87E-08 | 0.2                   | 0.00025  | 0.25                  | 8.41E-06 |
| TRIF(TICAM1)-mediated TLR4 signaling                                         | 0.33       | 2.87E-08 | 0.2                   | 0.00025  | 0.25                  | 8.41E-06 |
| Toll Like Receptor 4 (TLR4) Cascade                                          | 0.3        | 3.24E-08 | 0.207692              | 1.11E-05 | 0.230769              | 6.35E-06 |
| Rab regulation of trafficking                                                | 0.2983871  | 8.49E-08 | 0.129032              | 0.0622   | 0.217742              | 5.45E-05 |
| Interleukin-10 signaling                                                     | 0.4255319  | 1.41E-07 | 0.489362              | 4.44E-13 | 0.382979              | 1.78E-07 |
| Vesicle-mediated transport                                                   | 0.1874063  | 1.62E-07 | 0.110945              | 0.01071  | 0.152924              | 2.58E-06 |
| Interferon gamma signaling                                                   | 0.326087   | 1.64E-07 | 0.217391              | 7.62E-05 | 0.23913               | 6.01E-05 |
| Membrane Trafficking                                                         | 0.1894904  | 1.78E-07 | 0.111465              | 0.01163  | 0.16242               | 1.41E-07 |
| Signaling by Receptor Tyrosine Kinases                                       | 0.2021978  | 2.52E-07 | 0.18022               | 3.38E-11 | 0.156044              | 4.74E-05 |
| Toll Like Receptor 7/8 (TLR7/8) Cascade                                      | 0.3191489  | 2.80E-07 | 0.180851              | 0.0023   | 0.234043              | 8.49E-05 |
| MyD88 dependent cascade initiated on endosome                                | 0.3191489  | 2.80E-07 | 0.180851              | 0.0023   | 0.234043              | 8.49E-05 |
| Toll Like Receptor 10 (TLR10) Cascade                                        | 0.3294118  | 3.33E-07 | 0.2                   | 0.00072  | 0.258824              | 1.60E-05 |
| Toll Like Receptor 5 (TLR5) Cascade                                          | 0.3294118  | 3.33E-07 | 0.2                   | 0.00072  | 0.258824              | 1.60E-05 |
| MyD88 cascade initiated on plasma membrane                                   | 0.3294118  | 3.33E-07 | 0.2                   | 0.00072  | 0.258824              | 1.60E-05 |
| MyD88:MAL(TIRAP) cascade initiated on plasma membrane                        | 0.3157895  | 3.62E-07 | 0.189474              | 0.001    | 0.242105              | 3.33E-05 |
| Toll Like Receptor TLR6:TLR2 Cascade                                         | 0.3157895  | 3.62E-07 | 0.189474              | 0.001    | 0.242105              | 3.33E-05 |
| MAPK family signaling cascades                                               | 0.221843   | 5.50E-07 | 0.139932              | 0.00107  | 0.177474              | 1.60E-05 |
| Toll-like Receptor Cascades                                                  | 0.2645161  | 6.55E-07 | 0.193548              | 1.59E-05 | 0.219355              | 5.20E-06 |
| Interleukin-1 family signaling                                               | 0.2733813  | 6.86E-07 | 0.223022              | 4.97E-07 | 0.294964              | 5.11E-11 |
| TRAF6 mediated induction of NFkB and MAP kinases upon TLR7/8 or 9 activation | 0.311828   | 7.61E-07 | 0.182796              | 0.00204  | 0.236559              | 7.15E-05 |
| Toll Like Receptor 9 (TLR9) Cascade                                          | 0.3061224  | 7.66E-07 | 0.173469              | 0.00362  | 0.22449               | 0.00016  |
| Toll Like Receptor TLR1:TLR2 Cascade                                         | 0.3061224  | 7.66E-07 | 0.183673              | 0.00145  | 0.234694              | 5.64E-05 |
| Toll Like Receptor 2 (TLR2) Cascade                                          | 0.3061224  | 7.66E-07 | 0.183673              | 0.00145  | 0.234694              | 5.64E-05 |
| Clathrin-mediated endocytosis                                                | 0.2642857  | 2.33E-06 | 0.142857              | 0.01528  | 0.171429              | 0.00469  |
| Interleukin-1 signaling                                                      | 0.2912621  | 2.44E-06 | 0.23301               | 4.26E-06 | 0.300971              | 6.81E-09 |
| DDX58/IFIH1-mediated induction of interferon-alpha/beta                      | 0.3205128  | 2.49E-06 | 0.230769              | 7.59E-05 | 0.25641               | 4.46E-05 |

|                                                                                                |           |          |          |          |          |          |
|------------------------------------------------------------------------------------------------|-----------|----------|----------|----------|----------|----------|
| Death Receptor Signalling                                                                      | 0.2624113 | 2.80E-06 | 0.177305 | 0.00034  | 0.205674 | 8.77E-05 |
| Interleukin-6 signaling                                                                        | 0.7272727 | 5.14E-06 | 0.727273 | 3.58E-07 | 0.727273 | 1.06E-06 |
| MAPK1/MAPK3 signaling                                                                          | 0.2165354 | 8.75E-06 | 0.145669 | 0.00088  | 0.181102 | 2.90E-05 |
| TBC/RABGAPs                                                                                    | 0.3695652 | 1.22E-05 | 0.130435 | 0.19558  | 0.217391 | 0.01223  |
| RAB GEFs exchange GTP for GDP on RABs                                                          | 0.2888889 | 1.33E-05 | 0.133333 | 0.08015  | 0.233333 | 0.00013  |
| TNFR2 non-canonical NF-kB pathway                                                              | 0.2745098 | 1.80E-05 | 0.284314 | 3.70E-09 | 0.264706 | 1.12E-06 |
| Syndecan interactions                                                                          | 0.4444444 | 2.73E-05 | 0.37037  | 4.29E-05 | 0.148148 | 0.27058  |
| Interleukin-12 family signaling                                                                | 0.3275862 | 2.79E-05 | 0.344828 | 2.77E-08 | 0.310345 | 6.17E-06 |
| MAP kinase activation                                                                          | 0.3125    | 3.75E-05 | 0.171875 | 0.01859  | 0.234375 | 0.00108  |
| RAF/MAP kinase cascade                                                                         | 0.2096774 | 3.86E-05 | 0.137097 | 0.00384  | 0.173387 | 0.00015  |
| Adaptive Immune System                                                                         | 0.1679894 | 4.20E-05 | 0.145503 | 9.07E-09 | 0.154762 | 2.33E-07 |
| Glycosaminoglycan metabolism                                                                   | 0.25      | 4.89E-05 | 0.153226 | 0.00872  | 0.096774 | 0.56557  |
| RIP-mediated NFkB activation via ZBP1                                                          | 0.5294118 | 5.13E-05 | 0.294118 | 0.01164  | 0.352941 | 0.00422  |
| TAK1 activates NFkB by phosphorylation and activation of IKKs complex                          | 0.3939394 | 5.94E-05 | 0.212121 | 0.0193   | 0.272727 | 0.00359  |
| ZBP1(DAI) mediated induction of type I IFNs                                                    | 0.4761905 | 6.27E-05 | 0.238095 | 0.02881  | 0.333333 | 0.00291  |
| Interleukin-17 signaling                                                                       | 0.2916667 | 7.55E-05 | 0.166667 | 0.01805  | 0.222222 | 0.00138  |
| Diseases of signal transduction                                                                | 0.1878307 | 7.76E-05 | 0.142857 | 0.00011  | 0.15873  | 0.00011  |
| Transcriptional regulation of white adipocyte differentiation                                  | 0.2738095 | 0.0001   | 0.154762 | 0.02516  | 0.142857 | 0.11824  |
| Signaling by TGF-beta family members                                                           | 0.254902  | 0.00014  | 0.205882 | 0.00012  | 0.186275 | 0.00449  |
| Regulation of lipid metabolism by Peroxisome proliferator-activated receptor alpha (PPARalpha) | 0.2436975 | 0.00014  | 0.092437 | 0.43773  | 0.151261 | 0.04175  |
| Interferon Signaling                                                                           | 0.213198  | 0.00014  | 0.177665 | 2.27E-05 | 0.192893 | 3.44E-05 |
| Circadian Clock                                                                                | 0.2857143 | 0.00015  | 0.142857 | 0.07245  | 0.214286 | 0.00281  |
| Elastic fibre formation                                                                        | 0.3333333 | 0.00015  | 0.266667 | 0.00028  | 0.155556 | 0.14758  |
| SUMOylation of transcription cofactors                                                         | 0.3333333 | 0.00015  | 0.066667 | 0.75132  | 0.177778 | 0.06902  |
| Integrin alphaIIb beta3 signaling                                                              | 0.4074074 | 0.00015  | 0.259259 | 0.00627  | 0.444444 | 3.23E-06 |
| Integrin signaling                                                                             | 0.4074074 | 0.00015  | 0.259259 | 0.00627  | 0.444444 | 3.23E-06 |
| RAF-independent MAPK1/3 activation                                                             | 0.4347826 | 0.00016  | 0.26087  | 0.01085  | 0.391304 | 0.00019  |
| Nucleotide-binding domain, leucine rich repeat containing receptor (NLR) signaling pathways    | 0.3090909 | 0.00016  | 0.2      | 0.00602  | 0.254545 | 0.00066  |
| NOD1/2 Signaling Pathway                                                                       | 0.3611111 | 0.00017  | 0.25     | 0.00264  | 0.277778 | 0.00187  |
| p75NTR signals via NF-kB                                                                       | 0.5       | 0.00023  | 0.25     | 0.04189  | 0.3125   | 0.0157   |
| L1CAM interactions                                                                             | 0.2393162 | 0.00025  | 0.205128 | 4.16E-05 | 0.205128 | 0.00036  |

|                                                                                |           |         |          |          |           |          |
|--------------------------------------------------------------------------------|-----------|---------|----------|----------|-----------|----------|
| Interleukin-6 family signaling                                                 | 0.4166667 | 0.00025 | 0.458333 | 1.46E-06 | 0.4166667 | 4.31E-05 |
| TRAF6 mediated NF-kB activation                                                | 0.4166667 | 0.00025 | 0.291667 | 0.00306  | 0.291667  | 0.00667  |
| Cargo recognition for clathrin-mediated endocytosis                            | 0.25      | 0.00026 | 0.12     | 0.14385  | 0.15      | 0.06302  |
| Signaling by NOTCH1                                                            | 0.2739726 | 0.00028 | 0.164384 | 0.01998  | 0.178082  | 0.02419  |
| Ovarian tumor domain proteases                                                 | 0.3421053 | 0.00031 | 0.289474 | 0.00023  | 0.315789  | 0.00018  |
| Platelet activation, signaling and aggregation                                 | 0.1946565 | 0.00032 | 0.164122 | 2.13E-05 | 0.148855  | 0.00536  |
| TNF signaling                                                                  | 0.3255814 | 0.00034 | 0.209302 | 0.00923  | 0.209302  | 0.02164  |
| Interleukin-12 signaling                                                       | 0.3125    | 0.00034 | 0.270833 | 0.00013  | 0.270833  | 0.00053  |
| Hemostasis                                                                     | 0.166129  | 0.00035 | 0.120968 | 0.00113  | 0.133871  | 0.00189  |
| Interferon alpha/beta signaling                                                | 0.2753623 | 0.00037 | 0.26087  | 1.28E-05 | 0.231884  | 0.00085  |
| Negative regulators of DDX58/IFIH1 signaling                                   | 0.3529412 | 0.00038 | 0.264706 | 0.00172  | 0.323529  | 0.00026  |
| Axon guidance                                                                  | 0.168784  | 0.00039 | 0.137931 | 1.55E-05 | 0.141561  | 0.00051  |
| Signal attenuation                                                             | 0.6       | 0.00041 | 0.3      | 0.04722  | 0.3       | 0.06697  |
| Non-integrin membrane-ECM interactions                                         | 0.2881356 | 0.00042 | 0.305085 | 1.09E-06 | 0.118644  | 0.35819  |
| PIP3 activates AKT signaling                                                   | 0.1923077 | 0.00049 | 0.119231 | 0.03556  | 0.176923  | 5.29E-05 |
| Signaling by NTRKs                                                             | 0.2424242 | 0.00055 | 0.161616 | 0.00935  | 0.171717  | 0.01549  |
| Regulation of TP53 Activity through Association with Co-factors                | 0.5       | 0.00058 | 0.142857 | 0.33868  | 0.285714  | 0.0415   |
| Regulation of IFNG signaling                                                   | 0.5       | 0.00058 | 0.5      | 6.49E-05 | 0.642857  | 1.04E-06 |
| PPARA activates gene expression                                                | 0.2307692 | 0.00059 | 0.094017 | 0.41528  | 0.153846  | 0.0361   |
| RORA activates gene expression                                                 | 0.4444444 | 0.00062 | 0.277778 | 0.01501  | 0.222222  | 0.09295  |
| Cell-extracellular matrix interactions                                         | 0.4444444 | 0.00062 | 0.111111 | 0.4624   | 0.388889  | 0.00104  |
| TNF receptor superfamily (TNFSF) members mediating non-canonical NF-kB pathway | 0.4444444 | 0.00062 | 0.333333 | 0.00288  | 0.277778  | 0.02612  |
| Assembly of collagen fibrils and other multimeric structures                   | 0.2786885 | 0.00064 | 0.278689 | 8.55E-06 | 0.065574  | 0.86203  |
| Signaling by NTRK1 (TRKA)                                                      | 0.2564103 | 0.00072 | 0.192308 | 0.00219  | 0.179487  | 0.01856  |
| Interleukin-27 signaling                                                       | 0.5454545 | 0.00082 | 0.818182 | 1.09E-08 | 0.545455  | 0.00026  |
| Integrin cell surface interactions                                             | 0.2470588 | 0.00091 | 0.235294 | 2.28E-05 | 0.176471  | 0.01754  |
| Smooth Muscle Contraction                                                      | 0.3243243 | 0.00092 | 0.081081 | 0.62281  | 0.297297  | 0.0006   |
| NOTCH1 Intracellular Domain Regulates Transcription                            | 0.2978723 | 0.00092 | 0.170213 | 0.04361  | 0.148936  | 0.1735   |
| Cytosolic sensors of pathogen-associated DNA                                   | 0.2698413 | 0.00096 | 0.142857 | 0.08556  | 0.190476  | 0.01815  |
| YAP1- and WWTR1 (TAZ)-stimulated gene expression                               | 0.4666667 | 0.00097 | 0.133333 | 0.37068  | 0.333333  | 0.01172  |
| IGF1R signaling cascade                                                        | 0.2830189 | 0.0011  | 0.132075 | 0.16287  | 0.169811  | 0.07105  |
| Regulation of TNFR1 signaling                                                  | 0.3333333 | 0.00116 | 0.212121 | 0.0193   | 0.242424  | 0.01256  |
| Chemokine receptors bind chemokines                                            | 0.2916667 | 0.00116 | 0.291667 | 3.02E-05 | 0.270833  | 0.00053  |

|                                                                                    |           |         |          |          |          |          |
|------------------------------------------------------------------------------------|-----------|---------|----------|----------|----------|----------|
| Molecules associated with elastic fibres                                           | 0.3157895 | 0.0012  | 0.236842 | 0.00392  | 0.157895 | 0.16407  |
| Diseases of Immune System                                                          | 0.375     | 0.00126 | 0.25     | 0.01345  | 0.166667 | 0.20465  |
| Diseases associated with the TLR signaling cascade                                 | 0.375     | 0.00126 | 0.25     | 0.01345  | 0.166667 | 0.20465  |
| Growth hormone receptor signaling                                                  | 0.375     | 0.00126 | 0.291667 | 0.00306  | 0.375    | 0.00027  |
| Signaling by Type 1 Insulin-like Growth Factor 1 Receptor (IGF1R)                  | 0.2777778 | 0.00136 | 0.12963  | 0.17432  | 0.166667 | 0.0782   |
| Semaphorin interactions                                                            | 0.2615385 | 0.0014  | 0.138462 | 0.09962  | 0.123077 | 0.30463  |
| TNFs bind their physiological receptors                                            | 0.3448276 | 0.00144 | 0.37931  | 1.36E-05 | 0.206897 | 0.05892  |
| COPI-independent Golgi-to-ER retrograde traffic                                    | 0.2857143 | 0.00145 | 0.265306 | 0.00017  | 0.326531 | 9.73E-06 |
| NOTCH2 intracellular domain regulates transcription                                | 0.5       | 0.00147 | NA       | NA       | 0.166667 | 0.33255  |
| Interleukin-35 Signalling                                                          | 0.5       | 0.00147 | 0.666667 | 9.93E-07 | 0.5      | 0.00048  |
| TICAM1-dependent activation of IRF3/IRF7                                           | 0.5       | 0.00147 | 0.25     | 0.07623  | 0.333333 | 0.02403  |
| Intracellular signaling by second messengers                                       | 0.1808874 | 0.00148 | 0.122867 | 0.01648  | 0.163823 | 0.00025  |
| Transcriptional activity of SMAD2/SMAD3:SMAD4 heterotrimer                         | 0.2954545 | 0.00151 | 0.204545 | 0.01075  | 0.204545 | 0.02491  |
| Negative regulation of the PI3K/AKT network                                        | 0.2264151 | 0.00153 | 0.141509 | 0.03521  | 0.141509 | 0.09392  |
| Platelet Aggregation (Plug Formation)                                              | 0.3076923 | 0.00154 | 0.230769 | 0.00472  | 0.307692 | 0.00024  |
| Gene and protein expression by JAK-STAT signaling after Interleukin-12 stimulation | 0.3076923 | 0.00154 | 0.25641  | 0.00126  | 0.282051 | 0.00098  |
| Regulation of cholesterol biosynthesis by SREBP (SREBF)                            | 0.2727273 | 0.00167 | 0.109091 | 0.32803  | 0.218182 | 0.00616  |
| Transcriptional Regulation by MECP2                                                | 0.2727273 | 0.00167 | 0.072727 | 0.7022   | 0.145455 | 0.16745  |
| CLEC7A (Dectin-1) signaling                                                        | 0.2277228 | 0.00175 | 0.207921 | 0.0001   | 0.237624 | 3.15E-05 |
| Signaling by VEGF                                                                  | 0.2242991 | 0.00175 | 0.196262 | 0.00024  | 0.196262 | 0.00149  |
| Nuclear Events (kinase and transcription factor activation)                        | 0.36      | 0.00176 | 0.16     | 0.15995  | 0.24     | 0.03066  |
| Recycling pathway of L1                                                            | 0.2888889 | 0.0019  | 0.244444 | 0.00112  | 0.266667 | 0.00101  |
| RHO GTPases activate IQGAPs                                                        | 0.3333333 | 0.00193 | 0.266667 | 0.00293  | 0.4      | 1.21E-05 |
| Regulation of MECP2 expression and activity                                        | 0.3333333 | 0.00193 | 0.066667 | 0.73912  | 0.133333 | 0.33951  |
| Collagen formation                                                                 | 0.2333333 | 0.00198 | 0.244444 | 4.62E-06 | 0.044444 | 0.98116  |
| p75 NTR receptor-mediated signalling                                               | 0.2268041 | 0.0023  | 0.14433  | 0.03541  | 0.185567 | 0.00583  |
| NF-kB is activated and signals survival                                            | 0.4615385 | 0.00245 | 0.307692 | 0.02019  | 0.307692 | 0.03207  |
| Dissolution of Fibrin Clot                                                         | 0.4615385 | 0.00245 | 0.384615 | 0.00323  | 0.307692 | 0.03207  |
| Erythropoietin activates RAS                                                       | 0.4615385 | 0.00245 | 0.230769 | 0.09304  | 0.384615 | 0.00593  |
| Metabolism of lipids                                                               | 0.1546811 | 0.00247 | 0.097693 | 0.12147  | 0.12076  | 0.02119  |
| HS-GAG biosynthesis                                                                | 0.3225806 | 0.00254 | 0.193548 | 0.04429  | 0.16129  | 0.18295  |
| RHO GTPases Activate WASPs and WAVES                                               | 0.3055556 | 0.00256 | 0.194444 | 0.03021  | 0.25     | 0.00671  |

|                                                         |           |         |          |          |          |          |
|---------------------------------------------------------|-----------|---------|----------|----------|----------|----------|
| IRS-related events triggered by IGF1R                   | 0.2692308 | 0.00268 | 0.115385 | 0.28199  | 0.153846 | 0.13308  |
| Signaling by NOTCH1 PEST Domain Mutants in Cancer       | 0.2586207 | 0.00294 | 0.172414 | 0.02372  | 0.12069  | 0.34165  |
| Signaling by NOTCH1 in Cancer                           | 0.2586207 | 0.00294 | 0.172414 | 0.02372  | 0.12069  | 0.34165  |
| Constitutive Signaling by NOTCH1 PEST Domain Mutants    | 0.2586207 | 0.00294 | 0.172414 | 0.02372  | 0.12069  | 0.34165  |
| Signaling by NOTCH1 HD+PEST Domain Mutants in Cancer    | 0.2586207 | 0.00294 | 0.172414 | 0.02372  | 0.12069  | 0.34165  |
| Constitutive Signaling by NOTCH1 HD+PEST Domain Mutants | 0.2586207 | 0.00294 | 0.172414 | 0.02372  | 0.12069  | 0.34165  |
| VEGFA-VEGFR2 Pathway                                    | 0.2222222 | 0.00302 | 0.212121 | 7.43E-05 | 0.20202  | 0.00132  |
| PI5P, PP2A and IER3 Regulate PI3K/AKT Signaling         | 0.2222222 | 0.00302 | 0.131313 | 0.07771  | 0.121212 | 0.26334  |
| Activation of gene expression by SREBF (SREBP)          | 0.2857143 | 0.0031  | 0.119048 | 0.28685  | 0.214286 | 0.01868  |
| BMAL1:CLOCK,NPAS2 activates circadian gene expression   | 0.3333333 | 0.00322 | 0.259259 | 0.00627  | 0.185185 | 0.11909  |
| Interleukin receptor SHC signaling                      | 0.3333333 | 0.00322 | 0.296296 | 0.0014   | 0.259259 | 0.01321  |
| Signaling by RAS mutants                                | 0.2641509 | 0.00325 | 0.150943 | 0.07886  | 0.188679 | 0.03141  |
| SMAD2/SMAD3:SMAD4 heterotrimer regulates transcription  | 0.3125    | 0.0033  | 0.21875  | 0.01638  | 0.1875   | 0.08775  |
| FCERI mediated NF-kB activation                         | 0.2317073 | 0.00345 | 0.207317 | 0.00047  | 0.268293 | 8.59E-06 |
| Interleukin-3, Interleukin-5 and GM-CSF signaling       | 0.2708333 | 0.00355 | 0.229167 | 0.00197  | 0.208333 | 0.01642  |
| Rho GTPase cycle                                        | 0.2028986 | 0.00368 | 0.123188 | 0.07905  | 0.130435 | 0.12903  |
| MAPK3 (ERK1) activation                                 | 0.5       | 0.00377 | 0.5      | 0.00078  | 0.5      | 0.00149  |
| adhesion                                                | 0.4285714 | 0.00385 | 0.142857 | 0.33868  | 0.214286 | 0.15199  |
| RUNX3 regulates NOTCH signaling                         | 0.4285714 | 0.00385 | 0.071429 | 0.71353  | 0.142857 | 0.40596  |
| Interleukin-15 signaling                                | 0.4285714 | 0.00385 | 0.285714 | 0.02639  | 0.357143 | 0.00849  |
| TRAF3-dependent IRF activation pathway                  | 0.4285714 | 0.00385 | 0.142857 | 0.33868  | 0.214286 | 0.15199  |
| Insulin receptor signalling cascade                     | 0.2592593 | 0.00391 | 0.148148 | 0.08601  | 0.166667 | 0.0782   |
| Signaling by PTK6                                       | 0.2592593 | 0.00391 | 0.166667 | 0.03773  | 0.277778 | 0.00015  |
| Signaling by Non-Receptor Tyrosine Kinases              | 0.2592593 | 0.00391 | 0.166667 | 0.03773  | 0.277778 | 0.00015  |
| Signaling by BMP                                        | 0.3214286 | 0.00425 | 0.285714 | 0.00181  | 0.321429 | 0.00101  |
| G-protein beta:gamma signalling                         | 0.3214286 | 0.00425 | 0.142857 | 0.2131   | 0.214286 | 0.05077  |
| Transcriptional regulation by RUNX3                     | 0.21875   | 0.00451 | 0.1875   | 0.00113  | 0.270833 | 1.10E-06 |
| Degradation of the extracellular matrix                 | 0.2       | 0.00454 | 0.207143 | 5.57E-06 | 0.071429 | 0.89183  |
| Neutrophil degranulation                                | 0.1607516 | 0.00458 | 0.148225 | 2.39E-06 | 0.150313 | 0.00014  |
| MHC class II antigen presentation                       | 0.2066116 | 0.00458 | 0.165289 | 0.00303  | 0.198347 | 0.0006   |
| Heparan sulfate/heparin (HS-GAG) metabolism             | 0.2545455 | 0.00468 | 0.127273 | 0.1861   | 0.090909 | 0.63871  |
| Activation of NMDA receptors and postsynaptic events    | 0.2727273 | 0.00471 | 0.159091 | 0.07725  | 0.159091 | 0.13536  |
| Interleukin-2 family signaling                          | 0.2727273 | 0.00471 | 0.25     | 0.00092  | 0.227273 | 0.00891  |
| Fc epsilon receptor (FCERI) signaling                   | 0.2014925 | 0.00474 | 0.186567 | 0.00015  | 0.231343 | 4.23E-06 |

|                                                                 |           |         |          |          |          |          |
|-----------------------------------------------------------------|-----------|---------|----------|----------|----------|----------|
| Signaling by TGF-beta Receptor Complex                          | 0.2328767 | 0.00522 | 0.178082 | 0.00823  | 0.178082 | 0.02419  |
| Signaling by MET                                                | 0.2278481 | 0.00526 | 0.278481 | 4.22E-07 | 0.189873 | 0.00913  |
| activated TAK1 mediates p38 MAPK activation                     | 0.3333333 | 0.00541 | 0.208333 | 0.04873  | 0.208333 | 0.07966  |
| Signaling by Erythropoietin                                     | 0.3333333 | 0.00541 | 0.208333 | 0.04873  | 0.25     | 0.02534  |
| Transcriptional activation of mitochondrial biogenesis          | 0.25      | 0.00556 | 0.107143 | 0.34361  | 0.178571 | 0.04401  |
| C-type lectin receptors (CLRs)                                  | 0.1971831 | 0.00557 | 0.169014 | 0.00089  | 0.197183 | 0.00024  |
| Regulated proteolysis of p75NTR                                 | 0.4545455 | 0.00623 | 0.454545 | 0.00134  | 0.363636 | 0.01734  |
| Dermatan sulfate biosynthesis                                   | 0.4545455 | 0.00623 | 0.272727 | 0.06092  | 0.181818 | 0.29481  |
| Signaling by Leptin                                             | 0.4545455 | 0.00623 | 0.272727 | 0.06092  | 0.272727 | 0.08558  |
| SUMOylation of immune response proteins                         | 0.4545455 | 0.00623 | 0.272727 | 0.06092  | 0.545455 | 0.00026  |
| RHO GTPases activate KTN1                                       | 0.4545455 | 0.00623 | 0.454545 | 0.00134  | 0.636364 | 1.99E-05 |
| Erythropoietin activates Phosphoinositide-3-kinase (PI3K)       | 0.4545455 | 0.00623 | 0.363636 | 0.01069  | 0.272727 | 0.08558  |
| Signaling by moderate kinase activity BRAF mutants              | 0.275     | 0.00626 | 0.175    | 0.05029  | 0.225    | 0.01367  |
| Paradoxical activation of RAF signaling by kinase inactive BRAF | 0.275     | 0.00626 | 0.175    | 0.05029  | 0.225    | 0.01367  |
| GPVI-mediated activation cascade                                | 0.2857143 | 0.00672 | 0.314286 | 0.0001   | 0.257143 | 0.0055   |
| NOTCH4 Intracellular Domain Regulates Transcription             | 0.35      | 0.0068  | 0.1      | 0.51902  | 0.1      | 0.59791  |
| Signaling by the B Cell Receptor (BCR)                          | 0.2053571 | 0.00688 | 0.232143 | 1.85E-06 | 0.232143 | 2.32E-05 |
| Laminin interactions                                            | 0.3       | 0.00705 | 0.266667 | 0.00293  | 0.133333 | 0.33951  |
| TNFR1-induced NFkappaB signaling pathway                        | 0.3       | 0.00705 | 0.166667 | 0.10774  | 0.166667 | 0.16593  |
| G beta:gamma signalling through PI3Kgamma                       | 0.32      | 0.00714 | 0.16     | 0.15995  | 0.24     | 0.03066  |
| TCR signaling                                                   | 0.2016807 | 0.00738 | 0.168067 | 0.00248  | 0.201681 | 0.00047  |
| Diseases associated with glycosaminoglycan metabolism           | 0.2682927 | 0.00764 | 0.146341 | 0.13294  | 0.073171 | 0.78103  |
| MET promotes cell motility                                      | 0.2682927 | 0.00764 | 0.365854 | 6.33E-07 | 0.121951 | 0.37603  |
| Collagen degradation                                            | 0.234375  | 0.00791 | 0.234375 | 0.00025  | 0.0625   | 0.88576  |
| Oncogenic MAPK signaling                                        | 0.2236842 | 0.00797 | 0.131579 | 0.11114  | 0.157895 | 0.06582  |
| MAPK targets/ Nuclear events mediated by MAP kinases            | 0.2903226 | 0.0089  | 0.129032 | 0.2703   | 0.258065 | 0.0085   |
| Arachidonic acid metabolism                                     | 0.2372881 | 0.00904 | 0.186441 | 0.01031  | 0.118644 | 0.35819  |
| Synthesis of Leukotrienes (LT) and Eoxins (EX)                  | 0.3333333 | 0.00915 | 0.190476 | 0.09849  | 0.142857 | 0.34057  |
| Signal transduction by L1                                       | 0.3333333 | 0.00915 | 0.190476 | 0.09849  | 0.238095 | 0.04858  |
| SHC-mediated cascade:FGFR1                                      | 0.3333333 | 0.00915 | 0.190476 | 0.09849  | 0.190476 | 0.14451  |
| TP53 Regulates Transcription of Death Receptors and Ligands     | 0.4166667 | 0.00963 | 0.166667 | 0.27339  | 0.333333 | 0.02403  |
| Interleukin-2 signaling                                         | 0.4166667 | 0.00963 | 0.333333 | 0.01497  | 0.166667 | 0.33255  |
| Signaling by Insulin receptor                                   | 0.2179487 | 0.01038 | 0.153846 | 0.032    | 0.166667 | 0.03935  |
| PI3K/AKT Signaling in Cancer                                    | 0.2061856 | 0.01076 | 0.14433  | 0.03541  | 0.123711 | 0.24107  |

|                                                                                     |           |         |          |         |          |          |
|-------------------------------------------------------------------------------------|-----------|---------|----------|---------|----------|----------|
| CREB phosphorylation through the activation of Ras                                  | 0.28125   | 0.01108 | 0.09375  | 0.52234 | 0.15625  | 0.20058  |
| Neurotransmitter receptors and postsynaptic signal transmission                     | 0.1858974 | 0.01113 | 0.108974 | 0.17719 | 0.102564 | 0.46574  |
| IL-6-type cytokine receptor ligand interactions                                     | 0.3529412 | 0.01155 | 0.411765 | 0.00029 | 0.294118 | 0.02048  |
| Metabolism of steroids                                                              | 0.1866667 | 0.0118  | 0.106667 | 0.20944 | 0.146667 | 0.03593  |
| Downstream TCR signaling                                                            | 0.2040816 | 0.01203 | 0.173469 | 0.00362 | 0.214286 | 0.00045  |
| ERK/MAPK targets                                                                    | 0.3181818 | 0.01205 | 0.136364 | 0.28863 | 0.181818 | 0.16374  |
| Regulation of actin dynamics for phagocytic cup formation                           | 0.2295082 | 0.01217 | 0.147541 | 0.07276 | 0.196721 | 0.0142   |
| EPH-Ephrin signaling                                                                | 0.2065217 | 0.0125  | 0.195652 | 0.00067 | 0.141304 | 0.11413  |
| PI3K Cascade                                                                        | 0.25      | 0.01325 | 0.113636 | 0.32124 | 0.136364 | 0.26006  |
| Signaling by NOTCH2                                                                 | 0.2727273 | 0.01365 | 0.060606 | 0.7858  | 0.121212 | 0.40891  |
| Chondroitin sulfate/dermatan sulfate metabolism                                     | 0.24      | 0.01376 | 0.14     | 0.1307  | 0.1      | 0.55201  |
| p75NTR recruits signalling complexes                                                | 0.3846154 | 0.01412 | 0.153846 | 0.30618 | 0.230769 | 0.12831  |
| Loss of function of MECP2 in Rett syndrome                                          | 0.3846154 | 0.01412 | 0.153846 | 0.30618 | 0.153846 | 0.36968  |
| Pervasive developmental disorders                                                   | 0.3846154 | 0.01412 | 0.153846 | 0.30618 | 0.153846 | 0.36968  |
| JNK (c-Jun kinases) phosphorylation and activation mediated by activated human TAK1 | 0.3043478 | 0.01557 | 0.130435 | 0.31278 | 0.217391 | 0.06834  |
| FRS-mediated FGFR1 signaling                                                        | 0.3043478 | 0.01557 | 0.130435 | 0.31278 | 0.130435 | 0.3962   |
| Gastrin-CREB signalling pathway via PKC and MAPK                                    | 0.3333333 | 0.01559 | 0.111111 | 0.4624  | 0.277778 | 0.02612  |
| Activation of IRF3/IRF7 mediated by TBK1/IKK epsilon                                | 0.3333333 | 0.01559 | 0.111111 | 0.4624  | 0.222222 | 0.09295  |
| EPH-ephrin mediated repulsion of cells                                              | 0.2352941 | 0.01608 | 0.196078 | 0.00995 | 0.078431 | 0.75097  |
| Signaling by NOTCH4                                                                 | 0.2073171 | 0.01691 | 0.195122 | 0.00135 | 0.231707 | 0.00029  |
| Post NMDA receptor activation events                                                | 0.25      | 0.01779 | 0.125    | 0.25322 | 0.125    | 0.3558   |
| Costimulation by the CD28 family                                                    | 0.2142857 | 0.018   | 0.157143 | 0.03406 | 0.157143 | 0.07813  |
| Transport to the Golgi and subsequent modification                                  | 0.1748634 | 0.01885 | 0.098361 | 0.29893 | 0.147541 | 0.02041  |
| Downstream signaling events of B Cell Receptor (BCR)                                | 0.2048193 | 0.01895 | 0.216867 | 0.00018 | 0.253012 | 3.60E-05 |
| Tryptophan catabolism                                                               | 0.3571429 | 0.01983 | 0.357143 | 0.00467 | 0.428571 | 0.00132  |
| PTK6 Regulates RHO GTPases, RAS GTPase and MAP kinases                              | 0.3571429 | 0.01983 | 0.285714 | 0.02639 | 0.5      | 0.00016  |
| RET signaling                                                                       | 0.2439024 | 0.02107 | 0.146341 | 0.13294 | 0.146341 | 0.21012  |
| PI Metabolism                                                                       | 0.202381  | 0.02118 | 0.107143 | 0.28784 | 0.190476 | 0.00701  |
| HSP90 chaperone cycle for steroid hormone receptors (SHR)                           | 0.2264151 | 0.02158 | 0.207547 | 0.00449 | 0.264151 | 0.00044  |
| Activation of BH3-only proteins                                                     | 0.2666667 | 0.02241 | 0.266667 | 0.00293 | 0.366667 | 7.28E-05 |
| Regulation of TP53 Activity through Acetylation                                     | 0.2666667 | 0.02241 | 0.033333 | 0.9315  | 0.133333 | 0.33951  |
| Hedgehog 'off' state                                                                | 0.1891892 | 0.02325 | 0.162162 | 0.00585 | 0.243243 | 6.46E-06 |

|                                                                            |           |         |          |         |          |          |
|----------------------------------------------------------------------------|-----------|---------|----------|---------|----------|----------|
| Diseases of glycosylation                                                  | 0.1811594 | 0.0236  | 0.123188 | 0.07905 | 0.07971  | 0.80769  |
| Signaling by high-kinase activity BRAF mutants                             | 0.25      | 0.02398 | 0.138889 | 0.18951 | 0.194444 | 0.05758  |
| Interleukin-21 signaling                                                   | 0.4       | 0.02423 | 0.4      | 0.00729 | 0.3      | 0.06697  |
| IRAK2 mediated activation of TAK1 complex                                  | 0.4       | 0.02423 | 0.2      | 0.20787 | 0.2      | 0.25677  |
| ER to Golgi Anterograde Transport                                          | 0.1776316 | 0.02431 | 0.098684 | 0.31677 | 0.164474 | 0.00682  |
| Signaling by BRAF and RAF fusions                                          | 0.2166667 | 0.02436 | 0.133333 | 0.13648 | 0.166667 | 0.06559  |
| Sema4D in semaphorin signaling                                             | 0.28      | 0.02465 | 0.16     | 0.15995 | 0.24     | 0.03066  |
| Interleukin-20 family signaling                                            | 0.28      | 0.02465 | 0.28     | 0.00395 | 0.2      | 0.09191  |
| NOTCH3 Intracellular Domain Regulates Transcription                        | 0.28      | 0.02465 | 0.12     | 0.36111 | 0.12     | 0.45048  |
| Antigen Presentation: Folding, assembly and peptide loading of class I MHC | 0.28      | 0.02465 | 0.16     | 0.15995 | 0.28     | 0.0085   |
| G alpha (12/13) signalling events                                          | 0.2025316 | 0.02471 | 0.088608 | 0.51705 | 0.113924 | 0.37114  |
| IRS-mediated signalling                                                    | 0.2291667 | 0.02498 | 0.104167 | 0.39101 | 0.145833 | 0.18714  |
| Signalling to RAS                                                          | 0.3       | 0.0264  | 0.2      | 0.08521 | 0.2      | 0.12624  |
| TICAM1, RIP1-mediated IKK complex recruitment                              | 0.3       | 0.0264  | 0.2      | 0.08521 | 0.2      | 0.12624  |
| Signaling by Hippo                                                         | 0.3       | 0.0264  | 0.1      | 0.51902 | 0.3      | 0.01023  |
| Receptor-type tyrosine-protein phosphatases                                | 0.3       | 0.0264  | NA       | NA      | 0.05     | 0.87361  |
| Unblocking of NMDA receptors, glutamate binding and activation             | 0.3       | 0.0264  | 0.15     | 0.2409  | 0.15     | 0.31256  |
| TP53 Regulates Transcription of Genes Involved in Cytochrome C Release     | 0.3       | 0.0264  | 0.2      | 0.08521 | 0.35     | 0.00212  |
| Activation of NF-kappaB in B cells                                         | 0.2089552 | 0.02677 | 0.208955 | 0.00133 | 0.268657 | 5.47E-05 |
| Synthesis of bile acids and bile salts via 27-hydroxycholesterol           | 0.3333333 | 0.02686 | 0.333333 | 0.00652 | 0.066667 | 0.78794  |
| GRB2:SOS provides linkage to MAPK signaling for Integrins                  | 0.3333333 | 0.02686 | 0.2      | 0.13062 | 0.4      | 0.00203  |
| p130Cas linkage to MAPK signaling for integrins                            | 0.3333333 | 0.02686 | 0.266667 | 0.03362 | 0.466667 | 0.00027  |
| MECP2 regulates neuronal receptors and channels                            | 0.3333333 | 0.02686 | 0.066667 | 0.73802 | 0.2      | 0.17691  |
| Trafficking of AMPA receptors                                              | 0.2580645 | 0.02711 | 0.16129  | 0.11994 | 0.16129  | 0.18295  |
| Glutamate binding, activation of AMPA receptors and synaptic plasticity    | 0.2580645 | 0.02711 | 0.16129  | 0.11994 | 0.16129  | 0.18295  |
| Uptake and actions of bacterial toxins                                     | 0.2580645 | 0.02711 | 0.096774 | 0.50055 | 0.129032 | 0.3627   |
| Downstream signaling of activated FGFR1                                    | 0.2580645 | 0.02711 | 0.225806 | 0.01378 | 0.193548 | 0.07741  |
| Defective B3GALTL causes Peters-plus syndrome (PpS)                        | 0.2432432 | 0.02841 | 0.216216 | 0.01134 | 0.108108 | 0.49867  |
| TP53 Regulates Transcription of Cell Cycle Genes                           | 0.2244898 | 0.02882 | 0.061224 | 0.80104 | 0.142857 | 0.20121  |
| Signaling by SCF-KIT                                                       | 0.2325581 | 0.02889 | 0.232558 | 0.00278 | 0.209302 | 0.02164  |
| Signaling by EGFR                                                          | 0.2325581 | 0.02889 | 0.186047 | 0.02711 | 0.209302 | 0.02164  |



|                                                                                                                  |           |         |          |         |          |          |
|------------------------------------------------------------------------------------------------------------------|-----------|---------|----------|---------|----------|----------|
| Other interleukin signaling                                                                                      | 0.2692308 | 0.03033 | 0.230769 | 0.01989 | 0.192308 | 0.10507  |
| Post-translational protein phosphorylation                                                                       | 0.1851852 | 0.03239 | 0.194444 | 0.00027 | 0.064815 | 0.91584  |
| Thrombin signalling through proteinase activated receptors (PARs)                                                | 0.25      | 0.03246 | 0.125    | 0.28995 | 0.1875   | 0.08775  |
| RUNX2 regulates bone development                                                                                 | 0.25      | 0.03246 | 0.21875  | 0.01638 | 0.0625   | 0.8361   |
| Nuclear Receptor transcription pathway                                                                           | 0.22      | 0.03307 | 0.12     | 0.25215 | 0.06     | 0.88099  |
| Presynaptic function of Kainate receptors                                                                        | 0.2857143 | 0.0333  | 0.047619 | 0.84677 | 0.142857 | 0.34057  |
| CD209 (DC-SIGN) signaling                                                                                        | 0.2857143 | 0.0333  | 0.142857 | 0.26464 | 0.142857 | 0.34057  |
| PI-3K cascade:FGFR1                                                                                              | 0.2857143 | 0.0333  | 0.190476 | 0.09849 | 0.142857 | 0.34057  |
| TP53 regulates transcription of additional cell cycle genes whose exact role in the p53 pathway remain uncertain | 0.2857143 | 0.0333  | 0.142857 | 0.26464 | 0.238095 | 0.04858  |
| Negative regulation of MET activity                                                                              | 0.2857143 | 0.0333  | 0.238095 | 0.02881 | 0.238095 | 0.04858  |
| Interleukin-37 signaling                                                                                         | 0.2857143 | 0.0333  | 0.285714 | 0.00676 | 0.380952 | 0.00053  |
| O-glycosylation of TSR domain-containing proteins                                                                | 0.2368421 | 0.03338 | 0.210526 | 0.01332 | 0.105263 | 0.52021  |
| Intrinsic Pathway for Apoptosis                                                                                  | 0.2272727 | 0.0335  | 0.204545 | 0.01075 | 0.340909 | 1.02E-05 |
| Plasma lipoprotein assembly, remodeling, and clearance                                                           | 0.2028986 | 0.03373 | 0.144928 | 0.06697 | 0.086957 | 0.68267  |
| Regulation of gene expression by Hypoxia-inducible Factor                                                        | 0.3636364 | 0.03452 | 0.090909 | 0.62547 | 0.181818 | 0.29481  |
| Signaling by activated point mutants of FGFR1                                                                    | 0.3636364 | 0.03452 | 0.181818 | 0.24053 | 0.090909 | 0.67925  |
| Type I hemidesmosome assembly                                                                                    | 0.3636364 | 0.03452 | 0.363636 | 0.01069 | 0.181818 | 0.29481  |
| MET activates RAP1 and RAC1                                                                                      | 0.3636364 | 0.03452 | 0.363636 | 0.01069 | 0.363636 | 0.01734  |
| Activated NTRK2 signals through FRS2 and FRS3                                                                    | 0.3636364 | 0.03452 | NA       | NA      | 0.272727 | 0.08558  |
| Regulation of KIT signaling                                                                                      | 0.3125    | 0.03529 | 0.1875   | 0.1511  | 0.1875   | 0.20284  |
| FGFR1 ligand binding and activation                                                                              | 0.3125    | 0.03529 | 0.1875   | 0.1511  | 0.0625   | 0.80879  |
| Microtubule-dependent trafficking of connexons from Golgi to the plasma membrane                                 | 0.3125    | 0.03529 | 0.25     | 0.04189 | 0.5      | 5.26E-05 |
| Regulation of gene expression in late stage (branching morphogenesis) pancreatic bud precursor cells             | 0.3125    | 0.03529 | NA       | NA      | 0.0625   | 0.80879  |
| Phospholipase C-mediated cascade: FGFR1                                                                          | 0.3125    | 0.03529 | 0.1875   | 0.1511  | 0.0625   | 0.80879  |
| MAPK6/MAPK4 signaling                                                                                            | 0.1910112 | 0.03544 | 0.157303 | 0.01811 | 0.224719 | 0.00031  |
| XBP1(S) activates chaperone genes                                                                                | 0.2105263 | 0.03658 | 0.052632 | 0.87569 | 0.157895 | 0.10219  |
| Endogenous sterols                                                                                               | 0.2592593 | 0.03682 | 0.222222 | 0.02377 | 0.037037 | 0.93878  |
| Intra-Golgi and retrograde Golgi-to-ER traffic                                                                   | 0.165     | 0.03696 | 0.13     | 0.02004 | 0.14     | 0.03422  |
| Translocation of SLC2A4 (GLUT4) to the plasma membrane                                                           | 0.2       | 0.03767 | 0.142857 | 0.07245 | 0.3      | 1.96E-06 |
| CD28 co-stimulation                                                                                              | 0.2424242 | 0.03847 | 0.242424 | 0.00552 | 0.272727 | 0.00359  |

|                                                                                                                             |           |         |          |          |          |          |
|-----------------------------------------------------------------------------------------------------------------------------|-----------|---------|----------|----------|----------|----------|
| Negative regulation of FGFR1 signaling                                                                                      | 0.2424242 | 0.03847 | 0.090909 | 0.54359  | 0.090909 | 0.64182  |
| Formation of Fibrin Clot (Clotting Cascade)                                                                                 | 0.2307692 | 0.03892 | 0.205128 | 0.01553  | 0.179487 | 0.08241  |
| RAB geranylgeranylation                                                                                                     | 0.203125  | 0.03951 | 0.140625 | 0.09243  | 0.171875 | 0.04562  |
| Golgi-to-ER retrograde transport                                                                                            | 0.1755725 | 0.04003 | 0.145038 | 0.0153   | 0.183206 | 0.00192  |
| Beta-catenin independent WNT signaling                                                                                      | 0.1724138 | 0.04045 | 0.144828 | 0.01135  | 0.165517 | 0.00733  |
| Signaling by PDGF                                                                                                           | 0.2068966 | 0.04126 | 0.241379 | 0.00028  | 0.275862 | 9.95E-05 |
| Constitutive Signaling by Aberrant PI3K in Cancer                                                                           | 0.1971831 | 0.04192 | 0.15493  | 0.03732  | 0.098592 | 0.55374  |
| Cell junction organization                                                                                                  | 0.1868132 | 0.04276 | 0.153846 | 0.02165  | 0.153846 | 0.05957  |
| Regulation of Insulin-like Growth Factor (IGF) transport and uptake by Insulin-like Growth Factor Binding Proteins (IGFBPs) | 0.176     | 0.04287 | 0.168    | 0.00197  | 0.056    | 0.96811  |
| G alpha (q) signalling events                                                                                               | 0.1619048 | 0.04385 | 0.114286 | 0.08617  | 0.109524 | 0.32064  |
| MAP2K and MAPK activation                                                                                                   | 0.225     | 0.04505 | 0.125    | 0.25322  | 0.175    | 0.09186  |
| Transport of connexons to the plasma membrane                                                                               | 0.2941176 | 0.04518 | 0.294118 | 0.01164  | 0.470588 | 9.08E-05 |
| Regulation of RUNX1 Expression and Activity                                                                                 | 0.2941176 | 0.04518 | 0.058824 | 0.7809   | NA       | NA       |
| TICAM1,TRAF6-dependent induction of TAK1 complex                                                                            | 0.2941176 | 0.04518 | 0.176471 | 0.17251  | 0.117647 | 0.50801  |
| IRAK2 mediated activation of TAK1 complex upon TLR7/8 or 9 stimulation                                                      | 0.2941176 | 0.04518 | 0.176471 | 0.17251  | 0.117647 | 0.50801  |
| IRE1alpha activates chaperones                                                                                              | 0.2033898 | 0.04634 | 0.050847 | 0.88997  | 0.152542 | 0.12027  |
| PTEN Regulation                                                                                                             | 0.1714286 | 0.04659 | 0.107143 | 0.21393  | 0.214286 | 2.96E-05 |
| FGFR1c ligand binding and activation                                                                                        | 0.3333333 | 0.04696 | 0.166667 | 0.27339  | 0.083333 | 0.71077  |
| Caspase-mediated cleavage of cytoskeletal proteins                                                                          | 0.3333333 | 0.04696 | NA       | NA       | 0.166667 | 0.33255  |
| COPI-mediated anterograde transport                                                                                         | 0.1818182 | 0.04782 | 0.141414 | 0.04115  | 0.181818 | 0.00724  |
| Fc gamma receptor (FCGR) dependent phagocytosis                                                                             | 0.1860465 | 0.04992 | 0.162791 | 0.01364  | 0.186047 | 0.00881  |
| Response to elevated platelet cytosolic Ca2+                                                                                | 0.1716418 | 0.04998 | 0.149254 | 0.00965  | 0.104478 | 0.44468  |
| MET activates PTK2 signaling                                                                                                | 0.2       | 0.14494 | 0.4      | 2.83E-06 | 0.033333 | 0.95514  |
| Transcriptional regulation by RUNX2                                                                                         | 0.1652893 | 0.08763 | 0.198347 | 7.33E-05 | 0.181818 | 0.0032   |
| ECM proteoglycans                                                                                                           | 0.1842105 | 0.0683  | 0.210526 | 0.00057  | 0.052632 | 0.9486   |
| Nicotinamide salvaging                                                                                                      | 0.2631579 | 0.06943 | 0.368421 | 0.00065  | 0.315789 | 0.0078   |
| Nicotinate metabolism                                                                                                       | 0.1935484 | 0.16256 | 0.290323 | 0.00083  | 0.225806 | 0.02775  |
| Transport of small molecules                                                                                                | 0.1217151 | 0.47778 | 0.118949 | 0.00084  | 0.08852  | 0.8332   |
| ABC-family proteins mediated transport                                                                                      | 0.1165049 | 0.59567 | 0.184466 | 0.00102  | 0.145631 | 0.07747  |
| Regulation of RUNX2 expression and activity                                                                                 | 0.1232877 | 0.52474 | 0.205479 | 0.00109  | 0.219178 | 0.00161  |
| Oxygen-dependent proline hydroxylation of Hypoxia-inducible Factor Alpha                                                    | 0.1818182 | 0.09403 | 0.212121 | 0.00114  | 0.272727 | 4.39E-05 |

|                                                                                    |           |         |          |         |          |          |
|------------------------------------------------------------------------------------|-----------|---------|----------|---------|----------|----------|
| NIK-->noncanonical NF-kB signaling                                                 | 0.1694915 | 0.16723 | 0.220339 | 0.00117 | 0.271186 | 0.00012  |
| Dectin-1 mediated noncanonical NF-kB signaling                                     | 0.1833333 | 0.10112 | 0.216667 | 0.00138 | 0.266667 | 0.00015  |
| Programmed Cell Death                                                              | 0.1569767 | 0.08981 | 0.156977 | 0.0014  | 0.226744 | 4.39E-07 |
| Regulation of Hypoxia-inducible Factor (HIF) by oxygen                             | 0.1866667 | 0.06231 | 0.2      | 0.00145 | 0.253333 | 8.21E-05 |
| Cellular response to hypoxia                                                       | 0.1866667 | 0.06231 | 0.2      | 0.00145 | 0.253333 | 8.21E-05 |
| Peptide ligand-binding receptors                                                   | 0.1578947 | 0.07264 | 0.152632 | 0.00148 | 0.126316 | 0.11846  |
| Negative regulation of NOTCH4 signaling                                            | 0.1481481 | 0.32322 | 0.222222 | 0.00166 | 0.277778 | 0.00015  |
| Apoptosis                                                                          | 0.1538462 | 0.113   | 0.153846 | 0.00227 | 0.224852 | 7.69E-07 |
| ABC transporters in lipid homeostasis                                              | 0.1111111 | 0.65671 | 0.333333 | 0.00288 | NA       | NA       |
| Regulation of mRNA stability by proteins that bind AU-rich elements                | 0.1590909 | 0.16919 | 0.181818 | 0.00289 | 0.215909 | 0.00075  |
| TNFR1-induced proapoptotic signaling                                               | 0.3076923 | 0.06156 | 0.384615 | 0.00323 | 0.307692 | 0.03207  |
| Collagen chain trimerization                                                       | 0.1818182 | 0.15331 | 0.227273 | 0.00333 | 0.045455 | 0.93895  |
| Vpu mediated degradation of CD4                                                    | 0.1538462 | 0.28608 | 0.211538 | 0.00384 | 0.269231 | 0.00035  |
| The role of GTSE1 in G2/M progression after G2 checkpoint                          | 0.1733333 | 0.11212 | 0.186667 | 0.00403 | 0.306667 | 4.13E-07 |
| Antigen processing-Cross presentation                                              | 0.1717172 | 0.08284 | 0.171717 | 0.00403 | 0.191919 | 0.00319  |
| ER-Phagosome pathway                                                               | 0.1807229 | 0.0696  | 0.180723 | 0.00409 | 0.216867 | 0.00096  |
| Degradation of GLI2 by the proteasome                                              | 0.15      | 0.29414 | 0.2      | 0.00421 | 0.25     | 0.00053  |
| GLI3 is processed to GLI3R by the proteasome                                       | 0.15      | 0.29414 | 0.2      | 0.00421 | 0.25     | 0.00053  |
| Antigen activates B Cell Receptor (BCR) leading to generation of second messengers | 0.1875    | 0.18103 | 0.25     | 0.00451 | 0.15625  | 0.20058  |
| PCP/CE pathway                                                                     | 0.1630435 | 0.13728 | 0.173913 | 0.00457 | 0.217391 | 0.0005   |
| Retrograde neurotrophin signalling                                                 | 0.1428571 | 0.51672 | 0.357143 | 0.00467 | NA       | NA       |
| DCC mediated attractive signaling                                                  | 0.2857143 | 0.07825 | 0.357143 | 0.00467 | 0.214286 | 0.15199  |
| Disorders of transmembrane transporters                                            | 0.1388889 | 0.28278 | 0.152778 | 0.00519 | 0.111111 | 0.33873  |
| FBXL7 down-regulates AURKA during mitotic entry and in early mitosis               | 0.1481481 | 0.32322 | 0.203704 | 0.00521 | 0.277778 | 0.00015  |
| Activation of Matrix Metalloproteinases                                            | 0.1818182 | 0.20029 | 0.242424 | 0.00552 | NA       | NA       |
| Metabolism of polyamines                                                           | 0.1395349 | 0.33991 | 0.174419 | 0.00577 | 0.232558 | 0.00019  |
| SCF-beta-TrCP mediated degradation of Emi1                                         | 0.1272727 | 0.50015 | 0.2      | 0.00602 | 0.254545 | 0.00066  |
| Regulation of RUNX3 expression and activity                                        | 0.1454545 | 0.34211 | 0.2      | 0.00602 | 0.290909 | 4.91E-05 |
| Anchoring fibril formation                                                         | 0.2666667 | 0.09693 | 0.333333 | 0.00652 | 0.066667 | 0.78794  |
| Platelet Adhesion to exposed collagen                                              | 0.2666667 | 0.09693 | 0.333333 | 0.00652 | 0.2      | 0.17691  |
| Synthesis of bile acids and bile salts                                             | 0.1764706 | 0.22026 | 0.235294 | 0.00669 | 0.088235 | 0.66214  |

|                                                                             |           |         |          |         |          |          |
|-----------------------------------------------------------------------------|-----------|---------|----------|---------|----------|----------|
| Hh mutants that don't undergo autocatalytic processing are degraded by ERAD | 0.1607143 | 0.22786 | 0.196429 | 0.00693 | 0.267857 | 0.00023  |
| EPHB-mediated forward signaling                                             | 0.2142857 | 0.05917 | 0.214286 | 0.00788 | 0.214286 | 0.01868  |
| Degradation of DVL                                                          | 0.1578947 | 0.24391 | 0.192982 | 0.00795 | 0.263158 | 0.00029  |
| Hedgehog ligand biogenesis                                                  | 0.1538462 | 0.25297 | 0.184615 | 0.00818 | 0.246154 | 0.00042  |
| Cross-presentation of soluble exogenous antigens (endosomes)                | 0.14      | 0.39792 | 0.2      | 0.00864 | 0.28     | 0.00023  |
| Regulation of activated PAK-2p34 by proteasome mediated degradation         | 0.14      | 0.39792 | 0.2      | 0.00864 | 0.28     | 0.00023  |
| Sphingolipid de novo biosynthesis                                           | 0.1395349 | 0.41793 | 0.209302 | 0.00923 | 0.139535 | 0.24305  |
| Downstream signal transduction                                              | 0.1724138 | 0.26686 | 0.241379 | 0.00949 | 0.310345 | 0.00133  |
| VEGFR2 mediated vascular permeability                                       | 0.1724138 | 0.26686 | 0.241379 | 0.00949 | 0.206897 | 0.05892  |
| Regulation of ornithine decarboxylase (ODC)                                 | 0.1372549 | 0.4186  | 0.196078 | 0.00995 | 0.27451  | 0.00028  |
| Class I MHC mediated antigen processing & presentation                      | 0.1428571 | 0.10491 | 0.121294 | 0.01    | 0.15903  | 0.00012  |
| Hh mutants abrogate ligand secretion                                        | 0.1525424 | 0.27709 | 0.186441 | 0.01031 | 0.254237 | 0.00043  |
| Collagen biosynthesis and modifying enzymes                                 | 0.1492537 | 0.28444 | 0.179104 | 0.01041 | 0.029851 | 0.99196  |
| Autodegradation of the E3 ubiquitin ligase COP1                             | 0.1538462 | 0.28608 | 0.192308 | 0.01141 | 0.288462 | 9.35E-05 |
| Ubiquitin-dependent degradation of Cyclin D1                                | 0.1346154 | 0.43921 | 0.192308 | 0.01141 | 0.269231 | 0.00035  |
| Ubiquitin-dependent degradation of Cyclin D                                 | 0.1346154 | 0.43921 | 0.192308 | 0.01141 | 0.269231 | 0.00035  |
| ABC transporter disorders                                                   | 0.1447368 | 0.30579 | 0.171053 | 0.0115  | 0.197368 | 0.00634  |
| Trafficking of GluR2-containing AMPA receptors                              | 0.2352941 | 0.13973 | 0.294118 | 0.01164 | 0.176471 | 0.22957  |
| SCF(Skp2)-mediated degradation of p27/p21                                   | 0.1166667 | 0.59612 | 0.183333 | 0.01168 | 0.233333 | 0.00165  |
| Degradation of GLI1 by the proteasome                                       | 0.1666667 | 0.18045 | 0.183333 | 0.01168 | 0.266667 | 0.00015  |
| Gap junction trafficking                                                    | 0.2       | 0.08516 | 0.2      | 0.01245 | 0.2      | 0.02852  |
| Regulation of Apoptosis                                                     | 0.1320755 | 0.45971 | 0.188679 | 0.01302 | 0.264151 | 0.00044  |
| Ubiquitin Mediated Degradation of Phosphorylated Cdc25A                     | 0.1320755 | 0.45971 | 0.188679 | 0.01302 | 0.264151 | 0.00044  |
| p53-Independent DNA Damage Response                                         | 0.1320755 | 0.45971 | 0.188679 | 0.01302 | 0.264151 | 0.00044  |
| p53-Independent G1/S DNA damage checkpoint                                  | 0.1320755 | 0.45971 | 0.188679 | 0.01302 | 0.264151 | 0.00044  |
| Regulation of PTEN stability and activity                                   | 0.1449275 | 0.31693 | 0.173913 | 0.01309 | 0.275362 | 2.34E-05 |
| Platelet degranulation                                                      | 0.1705426 | 0.05761 | 0.147287 | 0.01311 | 0.108527 | 0.38758  |
| Signaling by Hedgehog                                                       | 0.1632653 | 0.07424 | 0.142857 | 0.01315 | 0.217687 | 1.16E-05 |
| Defective CFTR causes cystic fibrosis                                       | 0.1311475 | 0.45693 | 0.180328 | 0.01319 | 0.245902 | 0.00063  |
| Synthesis of bile acids and bile salts via 7alpha-hydroxycholesterol        | 0.2083333 | 0.15472 | 0.25     | 0.01345 | 0.083333 | 0.69773  |
| Synthesis of very long-chain fatty acyl-CoAs                                | 0.1666667 | 0.32674 | 0.25     | 0.01345 | 0.166667 | 0.20465  |

|                                                                          |           |         |          |         |          |          |
|--------------------------------------------------------------------------|-----------|---------|----------|---------|----------|----------|
| Antigen processing: Ubiquitination & Proteasome degradation              | 0.1294498 | 0.33793 | 0.122977 | 0.01384 | 0.161812 | 0.00026  |
| Vif-mediated degradation of APOBEC3G                                     | 0.1296296 | 0.48004 | 0.185185 | 0.01479 | 0.259259 | 0.00054  |
| Crosslinking of collagen fibrils                                         | 0.2222222 | 0.16349 | 0.277778 | 0.01501 | NA       | NA       |
| Gap junction trafficking and regulation                                  | 0.212766  | 0.05031 | 0.191489 | 0.01644 | 0.212766 | 0.01421  |
| Regulation of Complement cascade                                         | 0.1489362 | 0.33605 | 0.191489 | 0.01644 | 0.148936 | 0.1735   |
| Autodegradation of Cdh1 by Cdh1:APC/C                                    | 0.1111111 | 0.6489  | 0.174603 | 0.01664 | 0.238095 | 0.00091  |
| Degradation of AXIN                                                      | 0.1272727 | 0.50015 | 0.181818 | 0.01674 | 0.272727 | 0.00019  |
| AUF1 (hnRNP D0) binds and destabilizes mRNA                              | 0.1428571 | 0.36115 | 0.178571 | 0.01887 | 0.267857 | 0.00023  |
| LDL clearance                                                            | 0.2105263 | 0.18858 | 0.263158 | 0.01897 | 0.105263 | 0.56938  |
| Regulation of IFNA signaling                                             | 0.1923077 | 0.19713 | 0.230769 | 0.01989 | 0.192308 | 0.10507  |
| CLEC7A (Dectin-1) induces NFAT activation                                | 0.1538462 | 0.47626 | 0.307692 | 0.02019 | 0.153846 | 0.36968  |
| Transport of inorganic cations/anions and amino acids/oligopeptides      | 0.1388889 | 0.31913 | 0.148148 | 0.02058 | 0.092593 | 0.62535  |
| Degradation of beta-catenin by the destruction complex                   | 0.1341463 | 0.40104 | 0.158537 | 0.02097 | 0.243902 | 9.57E-05 |
| Stabilization of p53                                                     | 0.1403509 | 0.38029 | 0.175439 | 0.0212  | 0.263158 | 0.00029  |
| Gap junction assembly                                                    | 0.1764706 | 0.22026 | 0.205882 | 0.02257 | 0.235294 | 0.01505  |
| Cyclin E associated events during G1/S transition                        | 0.1325301 | 0.41718 | 0.156627 | 0.023   | 0.216867 | 0.00096  |
| Cell surface interactions at the vascular wall                           | 0.1386861 | 0.29165 | 0.138686 | 0.02359 | 0.116788 | 0.26847  |
| Netrin-1 signaling                                                       | 0.18      | 0.14138 | 0.18     | 0.02406 | 0.12     | 0.36682  |
| APC/C:Cdc20 mediated degradation of Securin                              | 0.1044776 | 0.71252 | 0.164179 | 0.02548 | 0.223881 | 0.00178  |
| Cell-Cell communication                                                  | 0.1627907 | 0.0925  | 0.139535 | 0.02562 | 0.139535 | 0.07971  |
| Activation of RAC1                                                       | 0.1428571 | 0.51672 | 0.285714 | 0.02639 | 0.285714 | 0.0415   |
| CDT1 association with the CDC6:ORC:origin complex                        | 0.1186441 | 0.57765 | 0.169492 | 0.02646 | 0.237288 | 0.00138  |
| Bile acid and bile salt metabolism                                       | 0.1860465 | 0.13922 | 0.186047 | 0.02711 | 0.093023 | 0.62057  |
| Cyclin A:Cdk2-associated events at S phase entry                         | 0.1411765 | 0.32492 | 0.152941 | 0.02747 | 0.211765 | 0.00129  |
| Cellular responses to stress                                             | 0.1361502 | 0.17415 | 0.112676 | 0.0278  | 0.147887 | 0.00056  |
| Regulation of RAS by GAPs                                                | 0.1470588 | 0.30057 | 0.161765 | 0.02814 | 0.25     | 0.00023  |
| Immunoregulatory interactions between a Lymphoid and a non-Lymphoid cell | 0.1363636 | 0.3246  | 0.136364 | 0.03143 | 0.090909 | 0.65417  |
| Activation of BAD and translocation to mitochondria                      | 0.2       | 0.26759 | 0.266667 | 0.03362 | 0.466667 | 0.00027  |
| Synthesis of Prostaglandins (PG) and Thromboxanes (TX)                   | 0.2666667 | 0.09693 | 0.266667 | 0.03362 | 0.2      | 0.17691  |
| WNT5A-dependent internalization of FZD4                                  | 0.2       | 0.26759 | 0.266667 | 0.03362 | NA       | NA       |
| Intrinsic Pathway of Fibrin Clot Formation                               | 0.2272727 | 0.11668 | 0.227273 | 0.03474 | 0.090909 | 0.65065  |
| Orc1 removal from chromatin                                              | 0.0985915 | 0.76792 | 0.15493  | 0.03732 | 0.197183 | 0.00828  |

|                                                                                                          |           |         |          |         |          |          |
|----------------------------------------------------------------------------------------------------------|-----------|---------|----------|---------|----------|----------|
| Regulation of APC/C activators between G1/S and early anaphase                                           | 0.0875    | 0.86317 | 0.15     | 0.03803 | 0.1875   | 0.01025  |
| Signalling to ERKs                                                                                       | 0.2333333 | 0.06152 | 0.2      | 0.03838 | 0.2      | 0.0678   |
| DAP12 signaling                                                                                          | 0.2       | 0.14494 | 0.2      | 0.03838 | 0.2      | 0.0678   |
| CDO in myogenesis                                                                                        | 0.1333333 | 0.49664 | 0.2      | 0.03838 | 0.133333 | 0.33951  |
| Myogenesis                                                                                               | 0.1333333 | 0.49664 | 0.2      | 0.03838 | 0.133333 | 0.33951  |
| APC/C:Cdh1 mediated degradation of Cdc20 and other APC/C:Cdh1 targeted proteins in late mitosis/early G1 | 0.0972222 | 0.78047 | 0.152778 | 0.04079 | 0.208333 | 0.00374  |
| Cdc20:Phospho-APC/C mediated degradation of Cyclin A                                                     | 0.0972222 | 0.78047 | 0.152778 | 0.04079 | 0.208333 | 0.00374  |
| CDK-mediated phosphorylation and removal of Cdc6                                                         | 0.0972222 | 0.78047 | 0.152778 | 0.04079 | 0.208333 | 0.00374  |
| Class A/1 (Rhodopsin-like receptors)                                                                     | 0.1481481 | 0.07437 | 0.114198 | 0.04127 | 0.108025 | 0.2985   |
| Initial triggering of complement                                                                         | 0.2173913 | 0.1351  | 0.217391 | 0.04138 | 0.217391 | 0.06834  |
| Role of LAT2/NTAL/LAB on calcium mobilization                                                            | 0.25      | 0.11748 | 0.25     | 0.04189 | 0.375    | 0.00297  |
| Rap1 signalling                                                                                          | 0.25      | 0.11748 | 0.25     | 0.04189 | 0.1875   | 0.20284  |
| MAP3K8 (TPL2)-dependent MAPK1/3 activation                                                               | 0.25      | 0.11748 | 0.25     | 0.04189 | 0.1875   | 0.20284  |
| Asymmetric localization of PCP proteins                                                                  | 0.109375  | 0.66555 | 0.15625  | 0.04357 | 0.265625 | 0.0001   |
| APC:Cdc20 mediated degradation of cell cycle proteins prior to satisfaction of the cell cycle checkpoint | 0.0958904 | 0.79252 | 0.150685 | 0.04449 | 0.205479 | 0.00429  |
| Ion channel transport                                                                                    | 0.1236559 | 0.48139 | 0.123656 | 0.04521 | 0.096774 | 0.56237  |
| Cellular responses to external stimuli                                                                   | 0.1371769 | 0.13513 | 0.107356 | 0.04544 | 0.147117 | 0.00022  |
| Prolonged ERK activation events                                                                          | 0.1       | 0.72331 | 0.3      | 0.04722 | 0.2      | 0.25677  |
| p75NTR regulates axonogenesis                                                                            | 0.2       | 0.34377 | 0.3      | 0.04722 | 0.2      | 0.25677  |
| Thyroxine biosynthesis                                                                                   | 0.3       | 0.1097  | 0.3      | 0.04722 | 0.1      | 0.6443   |
| Regulation of commissural axon pathfinding by SLIT and ROBO                                              | 0.3       | 0.1097  | 0.3      | 0.04722 | 0.1      | 0.6443   |
| RUNX1 and FOXP3 control the development of regulatory T lymphocytes (Tregs)                              | 0.2       | 0.34377 | 0.3      | 0.04722 | NA       | NA       |
| Cytosolic sulfonation of small molecules                                                                 | 0.1666667 | 0.32674 | 0.208333 | 0.04873 | 0.125    | 0.42356  |
| RUNX2 regulates osteoblast differentiation                                                               | 0.2083333 | 0.15472 | 0.208333 | 0.04873 | 0.041667 | 0.91647  |
| Formation of tubulin folding intermediates by CCT/TriC                                                   | 0.2173913 | 0.1351  | 0.173913 | 0.12766 | 0.434783 | 2.76E-05 |
| G2/M Transition                                                                                          | 0.1597938 | 0.0606  | 0.108247 | 0.15346 | 0.190722 | 5.60E-05 |
| Mitotic G2-G2/M phases                                                                                   | 0.1581633 | 0.06773 | 0.107143 | 0.16465 | 0.188776 | 7.02E-05 |
| Hedgehog 'on' state                                                                                      | 0.1529412 | 0.21977 | 0.141176 | 0.05649 | 0.235294 | 0.00016  |
| Post-chaperonin tubulin folding pathway                                                                  | 0.25      | 0.08377 | 0.2      | 0.08521 | 0.4      | 0.00036  |

|                                                                              |           |         |          |         |          |         |
|------------------------------------------------------------------------------|-----------|---------|----------|---------|----------|---------|
| Cooperation of Prefoldin and TriC/CCT in actin and tubulin folding           | 0.2       | 0.14494 | 0.133333 | 0.2509  | 0.333333 | 0.00038 |
| Prefoldin mediated transfer of substrate to CCT/TriC                         | 0.2307692 | 0.08433 | 0.153846 | 0.1771  | 0.346154 | 0.00055 |
| RHO GTPase Effectors                                                         | 0.1297468 | 0.32975 | 0.088608 | 0.44703 | 0.155063 | 0.0008  |
| Protein folding                                                              | 0.1414141 | 0.30309 | 0.090909 | 0.47324 | 0.20202  | 0.00132 |
| Chaperonin-mediated protein folding                                          | 0.1505376 | 0.22608 | 0.096774 | 0.39843 | 0.204301 | 0.0015  |
| p53-Dependent G1 DNA Damage Response                                         | 0.1212121 | 0.54974 | 0.151515 | 0.05214 | 0.227273 | 0.00151 |
| p53-Dependent G1/S DNA damage checkpoint                                     | 0.1212121 | 0.54974 | 0.151515 | 0.05214 | 0.227273 | 0.00151 |
| mRNA Splicing - Major Pathway                                                | 0.0983607 | 0.85255 | 0.027322 | 0.99967 | 0.169399 | 0.00174 |
| Cholesterol biosynthesis                                                     | 0.24      | 0.07187 | 0.08     | 0.64221 | 0.32     | 0.00198 |
| G1/S DNA Damage Checkpoints                                                  | 0.1176471 | 0.58503 | 0.147059 | 0.06175 | 0.220588 | 0.00208 |
| RHO GTPases activate CIT                                                     | 0.2       | 0.21478 | 0.15     | 0.2409  | 0.35     | 0.00212 |
| Signaling by NOTCH                                                           | 0.1574468 | 0.05259 | 0.114894 | 0.06866 | 0.157447 | 0.00255 |
| Signaling by Rho GTPases                                                     | 0.1418919 | 0.09235 | 0.087838 | 0.45023 | 0.13964  | 0.00261 |
| TP53 Regulates Transcription of Cell Death Genes                             | 0.2045455 | 0.07585 | 0.159091 | 0.07725 | 0.25     | 0.00284 |
| mRNA Splicing                                                                | 0.0942408 | 0.89541 | 0.026178 | 0.99981 | 0.162304 | 0.00344 |
| Mitotic Anaphase                                                             | 0.0954774 | 0.88883 | 0.100503 | 0.2536  | 0.160804 | 0.00346 |
| Mitotic Metaphase and Anaphase                                               | 0.095     | 0.89353 | 0.1      | 0.26086 | 0.16     | 0.00374 |
| Processing of Capped Intron-Containing Pre-mRNA                              | 0.0946502 | 0.91568 | 0.020576 | 1       | 0.152263 | 0.00453 |
| Separation of Sister Chromatids                                              | 0.0904255 | 0.92267 | 0.095745 | 0.34026 | 0.159574 | 0.0051  |
| APC/C:Cdc20 mediated degradation of mitotic proteins                         | 0.0933333 | 0.81509 | 0.146667 | 0.05255 | 0.2      | 0.00559 |
| Assembly of the pre-replicative complex                                      | 0.1029412 | 0.72715 | 0.147059 | 0.06175 | 0.205882 | 0.00559 |
| Signaling by cytosolic FGFR1 fusion mutants                                  | 0.1111111 | 0.65671 | 0.166667 | 0.19471 | 0.333333 | 0.00581 |
| Activation of APC/C and APC/C:Cdc20 mediated degradation of mitotic proteins | 0.0921053 | 0.82564 | 0.144737 | 0.05692 | 0.197368 | 0.00634 |
| Host Interactions of HIV factors                                             | 0.125     | 0.47851 | 0.125    | 0.07813 | 0.171875 | 0.0064  |
| HIV Infection                                                                | 0.1077586 | 0.75593 | 0.099138 | 0.25507 | 0.150862 | 0.00655 |
| RHO GTPases activate PAKs                                                    | 0.2083333 | 0.15472 | 0.125    | 0.33697 | 0.291667 | 0.00667 |
| Kinesins                                                                     | 0.1403509 | 0.38029 | 0.122807 | 0.2106  | 0.210526 | 0.00828 |
| Signaling by NTRK2 (TRKB)                                                    | 0.24      | 0.07187 | 0.12     | 0.36111 | 0.28     | 0.0085  |
| Deubiquitination                                                             | 0.1144781 | 0.65424 | 0.10101  | 0.18937 | 0.141414 | 0.00968 |
| FCERI mediated MAPK activation                                               | 0.21875   | 0.0825  | 0.125    | 0.28995 | 0.25     | 0.01038 |
| Constitutive Signaling by EGFRvIII                                           | 0.2666667 | 0.09693 | 0.2      | 0.13062 | 0.333333 | 0.01172 |
| Signaling by EGFRvIII in Cancer                                              | 0.2666667 | 0.09693 | 0.2      | 0.13062 | 0.333333 | 0.01172 |

|                                                                       |           |         |          |         |          |         |
|-----------------------------------------------------------------------|-----------|---------|----------|---------|----------|---------|
| TCF dependent signaling in response to WNT                            | 0.1030043 | 0.82373 | 0.081545 | 0.61843 | 0.145923 | 0.01195 |
| Transcriptional Regulation by TP53                                    | 0.1260274 | 0.39553 | 0.068493 | 0.90104 | 0.134247 | 0.01428 |
| STING mediated induction of host immune responses                     | 0.25      | 0.11748 | 0.1875   | 0.1511  | 0.3125   | 0.0157  |
| Metabolism of RNA                                                     | 0.074184  | 0.99998 | 0.043027 | 1       | 0.123145 | 0.01644 |
| Recruitment of NuMA to mitotic centrosomes                            | 0.1630435 | 0.13728 | 0.086957 | 0.53243 | 0.173913 | 0.01651 |
| MET activates RAS signaling                                           | 0.1818182 | 0.38952 | 0.181818 | 0.24053 | 0.363636 | 0.01734 |
| APC/C-mediated degradation of cell cycle proteins                     | 0.0813953 | 0.90683 | 0.139535 | 0.06079 | 0.174419 | 0.01939 |
| Regulation of mitotic cell cycle                                      | 0.0813953 | 0.90683 | 0.139535 | 0.06079 | 0.174419 | 0.01939 |
| Regulation of TP53 Degradation                                        | 0.1666667 | 0.26199 | 0.083333 | 0.60391 | 0.222222 | 0.02106 |
| Carboxyterminal post-translational modifications of tubulin           | 0.1388889 | 0.44121 | 0.111111 | 0.36979 | 0.222222 | 0.02106 |
| Regulation of TP53 Expression and Degradation                         | 0.1891892 | 0.15045 | 0.081081 | 0.62281 | 0.216216 | 0.02464 |
| Ub-specific processing proteases                                      | 0.0909091 | 0.93357 | 0.095455 | 0.32799 | 0.140909 | 0.02488 |
| Synthesis of PIPs at the Golgi membrane                               | 0.2777778 | 0.05656 | 0.055556 | 0.79963 | 0.277778 | 0.02612 |
| FGFR1 mutant receptor activation                                      | 0.1935484 | 0.16256 | 0.16129  | 0.11994 | 0.225806 | 0.02775 |
| RHO GTPases Activate Formins                                          | 0.1449275 | 0.22094 | 0.086957 | 0.51778 | 0.152174 | 0.0279  |
| Switching of origins to a post-replicative state                      | 0.0777778 | 0.9288  | 0.133333 | 0.08015 | 0.166667 | 0.02827 |
| Signaling by FGFR1 in disease                                         | 0.1578947 | 0.30554 | 0.131579 | 0.22066 | 0.210526 | 0.02861 |
| Synthesis of PIPs at the plasma membrane                              | 0.1886792 | 0.09872 | 0.075472 | 0.67388 | 0.188679 | 0.03141 |
| IRF3-mediated induction of type I IFN                                 | 0.2307692 | 0.2002  | 0.153846 | 0.30618 | 0.307692 | 0.03207 |
| Chk1/Chk2(Cds1) mediated inactivation of Cyclin B:Cdk1 complex        | NA        | NA      | 0.153846 | 0.30618 | 0.307692 | 0.03207 |
| Signaling by WNT                                                      | 0.1242424 | 0.44236 | 0.093939 | 0.31346 | 0.130303 | 0.03239 |
| SUMOylation of RNA binding proteins                                   | 0.1086957 | 0.66515 | 0.021739 | 0.98366 | 0.195652 | 0.03248 |
| Constitutive Signaling by Ligand-Responsive EGFR Cancer Variants      | 0.2105263 | 0.18858 | 0.157895 | 0.21755 | 0.263158 | 0.03267 |
| Signaling by EGFR in Cancer                                           | 0.2105263 | 0.18858 | 0.157895 | 0.21755 | 0.263158 | 0.03267 |
| Signaling by Ligand-Responsive EGFR Variants in Cancer                | 0.2105263 | 0.18858 | 0.157895 | 0.21755 | 0.263158 | 0.03267 |
| Regulation of TLR by endogenous ligand                                | 0.1052632 | 0.68619 | 0.105263 | 0.49121 | 0.263158 | 0.03267 |
| Neddylation                                                           | 0.1153846 | 0.62691 | 0.115385 | 0.06587 | 0.136752 | 0.03337 |
| Mitotic G1-G1/S phases                                                | 0.114094  | 0.63378 | 0.120805 | 0.08376 | 0.147651 | 0.03366 |
| Factors involved in megakaryocyte development and platelet production | 0.1566265 | 0.09646 | 0.078313 | 0.66923 | 0.144578 | 0.03418 |
| Signaling by ROBO receptors                                           | 0.0963303 | 0.89035 | 0.110092 | 0.1177  | 0.137615 | 0.03575 |
| DNA Replication Pre-Initiation                                        | 0.0823529 | 0.90051 | 0.117647 | 0.18697 | 0.164706 | 0.03644 |



|                                                                    |           |         |          |         |          |         |
|--------------------------------------------------------------------|-----------|---------|----------|---------|----------|---------|
| Antiviral mechanism by IFN-stimulated genes                        | 0.1153846 | 0.60787 | 0.102564 | 0.34796 | 0.166667 | 0.03935 |
| UCH proteinases                                                    | 0.1176471 | 0.58154 | 0.127451 | 0.09331 | 0.156863 | 0.03969 |
| RHO GTPases Activate ROCKs                                         | 0.2       | 0.21478 | 0.1      | 0.51902 | 0.25     | 0.04015 |
| Organelle biogenesis and maintenance                               | 0.1326531 | 0.28368 | 0.061224 | 0.95169 | 0.129252 | 0.04691 |
| Deactivation of the beta-catenin transactivating complex           | 0.1904762 | 0.12582 | 0.071429 | 0.70782 | 0.190476 | 0.04888 |
| Cooperation of PDCL (PhLP1) and TRiC/CCT in G-protein beta folding | 0.1190476 | 0.58256 | 0.047619 | 0.88454 | 0.190476 | 0.04888 |

**Table S4A. Enriched Reactome pathways from up-regulated genes at 8h pi.** Significant Reactome pathways using up-regulated DEGs from STM, T3SS-1<sup>mut</sup> or T3SS-2<sup>mut</sup>-infected HIOs at 8h.

**Table S4B: Reactome Pathways Downregulated 8h pi**

| Description                                                                  | STM        |          | T3SS-1 <sup>mut</sup> |          | T3SS-2 <sup>mut</sup> |          |
|------------------------------------------------------------------------------|------------|----------|-----------------------|----------|-----------------------|----------|
|                                                                              | gene ratio | p-value  | gene ratio            | p-value  | gene ratio            | p-value  |
| Translation                                                                  | 0.4261168  | 2.59E-39 | 0.1237113             | 4.07E-05 | 0.2061856             | 8.84E-11 |
| Metabolism of RNA                                                            | 0.268546   | 4.24E-26 | 0.0771513             | 0.04784  | 0.0919881             | 0.2981   |
| Influenza Viral RNA Transcription and Replication                            | 0.4962406  | 5.92E-26 | 0.1578947             | 5.39E-05 | 0.2556391             | 4.15E-09 |
| Eukaryotic Translation Termination                                           | 0.5806452  | 7.68E-26 | 0.1827957             | 4.17E-05 | 0.311828              | 3.79E-10 |
| Influenza Life Cycle                                                         | 0.4755245  | 2.58E-25 | 0.1468531             | 0.00016  | 0.2447552             | 8.44E-09 |
| Selenoamino acid metabolism                                                  | 0.5169492  | 2.61E-25 | 0.1949153             | 5.95E-07 | 0.2881356             | 1.30E-10 |
| Eukaryotic Translation Elongation                                            | 0.5698925  | 7.64E-25 | 0.1935484             | 1.10E-05 | 0.3225806             | 7.31E-11 |
| rRNA processing in the nucleus and cytosol                                   | 0.4102564  | 2.72E-24 | 0.1282051             | 0.00035  | 0.1846154             | 8.13E-06 |
| SRP-dependent cotranslational protein targeting to membrane                  | 0.5178571  | 3.57E-24 | 0.1517857             | 0.00044  | 0.3035714             | 2.65E-11 |
| Peptide chain elongation                                                     | 0.5730337  | 4.19E-24 | 0.2022472             | 5.77E-06 | 0.3258427             | 1.15E-10 |
| Viral mRNA Translation                                                       | 0.5730337  | 4.19E-24 | 0.1910112             | 2.30E-05 | 0.3258427             | 1.15E-10 |
| Selenocysteine synthesis                                                     | 0.5591398  | 7.28E-24 | 0.1935484             | 1.10E-05 | 0.3333333             | 1.34E-11 |
| Major pathway of rRNA processing in the nucleolus and cytosol                | 0.4108108  | 3.57E-23 | 0.1297297             | 0.00038  | 0.1891892             | 6.18E-06 |
| Influenza Infection                                                          | 0.4415584  | 5.39E-23 | 0.1428571             | 0.00017  | 0.2272727             | 6.38E-08 |
| rRNA processing                                                              | 0.3902439  | 1.28E-22 | 0.1219512             | 0.00074  | 0.1756098             | 2.55E-05 |
| Cell Cycle                                                                   | 0.2605304  | 1.62E-22 | 0.1060842             | 4.63E-06 | 0.0904836             | 0.35377  |
| Nonsense Mediated Decay (NMD) independent of the Exon Junction Complex (EJC) | 0.5368421  | 2.44E-22 | 0.1789474             | 5.53E-05 | 0.3052632             | 6.67E-10 |
| Formation of a pool of free 40S subunits                                     | 0.5148515  | 1.20E-21 | 0.1881188             | 9.71E-06 | 0.2871287             | 3.27E-09 |
| L13a-mediated translational silencing of Ceruloplasmin expression            | 0.4864865  | 6.21E-21 | 0.1711712             | 3.90E-05 | 0.2702703             | 8.42E-09 |
| GTP hydrolysis and joining of the 60S ribosomal subunit                      | 0.4821429  | 1.06E-20 | 0.1696429             | 4.44E-05 | 0.2678571             | 1.06E-08 |
| Nonsense-Mediated Decay (NMD)                                                | 0.4608696  | 3.20E-19 | 0.1565217             | 0.0002   | 0.2608696             | 2.06E-08 |
| Nonsense Mediated Decay (NMD) enhanced by the Exon Junction Complex (EJC)    | 0.4608696  | 3.20E-19 | 0.1565217             | 0.0002   | 0.2608696             | 2.06E-08 |
| Eukaryotic Translation Initiation                                            | 0.4537815  | 3.55E-19 | 0.1596639             | 0.0001   | 0.2605042             | 1.24E-08 |
| Cap-dependent Translation Initiation                                         | 0.4537815  | 3.55E-19 | 0.1596639             | 0.0001   | 0.2605042             | 1.24E-08 |
| Cell Cycle, Mitotic                                                          | 0.255597   | 9.29E-18 | 0.1100746             | 6.66E-06 | 0.0895522             | 0.39979  |
| Cell Cycle Checkpoints                                                       | 0.3105802  | 9.72E-18 | 0.1194539             | 0.00011  | 0.0853242             | 0.54404  |
| Metabolism of amino acids and derivatives                                    | 0.2864865  | 1.22E-17 | 0.1324324             | 2.16E-07 | 0.2                   | 2.46E-12 |
| S Phase                                                                      | 0.3664596  | 1.66E-15 | 0.2049689             | 5.47E-10 | 0.1552795             | 0.00259  |

|                                                                             |           |          |           |          |           |          |
|-----------------------------------------------------------------------------|-----------|----------|-----------|----------|-----------|----------|
| Activation of the pre-replicative complex                                   | 0.7272727 | 1.80E-15 | 0.4545455 | 2.00E-10 | 0.3333333 | 5.81E-05 |
| Activation of ATR in response to replication stress                         | 0.6756757 | 7.25E-15 | 0.4594595 | 9.71E-12 | 0.3243243 | 3.66E-05 |
| DNA Repair                                                                  | 0.2816456 | 1.73E-14 | 0.1234177 | 2.06E-05 | 0.1107595 | 0.07013  |
| G1/S Transition                                                             | 0.3816794 | 3.80E-14 | 0.2290076 | 1.97E-10 | 0.1679389 | 0.00168  |
| DNA strand elongation                                                       | 0.6875    | 1.79E-13 | 0.53125   | 4.61E-13 | 0.40625   | 9.35E-07 |
| DNA Replication                                                             | 0.3779528 | 1.91E-13 | 0.2125984 | 9.03E-09 | 0.1732283 | 0.00111  |
| Regulation of expression of SLITs and ROBOs                                 | 0.3333333 | 5.45E-13 | 0.1111111 | 0.0084   | 0.1754386 | 0.00012  |
| Mitotic G1-G1/S phases                                                      | 0.3489933 | 7.54E-13 | 0.2214765 | 6.29E-11 | 0.1677852 | 0.00085  |
| Synthesis of DNA                                                            | 0.3697479 | 4.69E-12 | 0.2016807 | 1.74E-07 | 0.1680672 | 0.00264  |
| G2/M Checkpoints                                                            | 0.3214286 | 1.13E-11 | 0.1428571 | 8.52E-05 | 0.1011905 | 0.2737   |
| Chromosome Maintenance                                                      | 0.3636364 | 8.01E-11 | 0.1181818 | 0.01665  | 0.1090909 | 0.23341  |
| Homology Directed Repair                                                    | 0.3333333 | 9.67E-11 | 0.1304348 | 0.00185  | 0.0869565 | 0.52576  |
| HDR through Homologous Recombination (HRR) or Single Strand Annealing (SSA) | 0.3333333 | 2.47E-10 | 0.1287879 | 0.0028   | 0.0909091 | 0.46216  |
| HDR through Homologous Recombination (HRR)                                  | 0.4328358 | 2.64E-10 | 0.1791045 | 0.00067  | 0.1492537 | 0.05857  |
| Mitochondrial translation                                                   | 0.3763441 | 4.11E-10 | 0.0645161 | 0.50791  | 0.1827957 | 0.00217  |
| Infectious disease                                                          | 0.2356021 | 5.79E-10 | 0.0890052 | 0.01761  | 0.1151832 | 0.02673  |
| Extension of Telomeres                                                      | 0.6       | 8.48E-10 | 0.3       | 5.09E-05 | 0.3       | 0.00067  |
| Signaling by ROBO receptors                                                 | 0.2752294 | 9.67E-10 | 0.0917431 | 0.04545  | 0.1513761 | 0.00092  |
| The citric acid (TCA) cycle and respiratory electron transport              | 0.2931034 | 1.68E-09 | 0.0804598 | 0.17917  | 0.1436782 | 0.00724  |
| DNA Double-Strand Break Repair                                              | 0.2951807 | 2.71E-09 | 0.1204819 | 0.00278  | 0.0843373 | 0.56869  |
| Homologous DNA Pairing and Strand Exchange                                  | 0.5       | 3.15E-09 | 0.2380952 | 0.00017  | 0.1904762 | 0.0245   |
| Presynaptic phase of homologous DNA pairing and strand exchange             | 0.5128205 | 4.24E-09 | 0.2307692 | 0.00046  | 0.2051282 | 0.01602  |
| Mitochondrial translation elongation                                        | 0.3678161 | 4.49E-09 | 0.0689655 | 0.44286  | 0.1954023 | 0.00101  |
| Mitochondrial translation termination                                       | 0.3678161 | 4.49E-09 | 0.0689655 | 0.44286  | 0.183908  | 0.00271  |
| DNA Replication Pre-Initiation                                              | 0.3647059 | 9.90E-09 | 0.2       | 1.22E-05 | 0.1529412 | 0.02858  |
| HDR through Single Strand Annealing (SSA)                                   | 0.5135135 | 1.01E-08 | 0.2702703 | 5.30E-05 | 0.2162162 | 0.0117   |
| Telomere C-strand (Lagging Strand) Synthesis                                | 0.625     | 1.02E-08 | 0.375     | 6.49E-06 | 0.2916667 | 0.00316  |
| Processing of Capped Intron-Containing Pre-mRNA                             | 0.255144  | 1.27E-08 | 0.0534979 | 0.73237  | 0.0411523 | 0.99802  |
| Respiratory electron transport                                              | 0.34      | 1.53E-08 | 0.1       | 0.08486  | 0.15      | 0.02307  |
| Mitochondrial translation initiation                                        | 0.3563218 | 1.88E-08 | 0.0689655 | 0.44286  | 0.183908  | 0.00271  |
| Activation of E2F1 target genes at G1/S                                     | 0.5714286 | 2.00E-08 | 0.4642857 | 2.39E-09 | 0.3928571 | 9.62E-06 |
| G1/S-Specific Transcription                                                 | 0.5714286 | 2.00E-08 | 0.4642857 | 2.39E-09 | 0.3928571 | 9.62E-06 |

|                                                                                                                     |           |          |           |          |           |          |
|---------------------------------------------------------------------------------------------------------------------|-----------|----------|-----------|----------|-----------|----------|
| tRNA Aminoacylation                                                                                                 | 0.4761905 | 2.18E-08 | 0.2380952 | 0.00017  | 0.1428571 | 0.14735  |
| Processing of DNA double-strand break ends                                                                          | 0.3367347 | 3.26E-08 | 0.122449  | 0.01619  | 0.0918367 | 0.46761  |
| Formation of the ternary complex, and subsequently, the 43S complex                                                 | 0.4313725 | 4.13E-08 | 0.1960784 | 0.00089  | 0.2156863 | 0.00342  |
| Unwinding of DNA                                                                                                    | 0.8333333 | 4.32E-08 | 0.6666667 | 7.51E-08 | 0.5       | 0.00023  |
| Telomere Maintenance                                                                                                | 0.3536585 | 6.50E-08 | 0.1219512 | 0.0275   | 0.1341463 | 0.09087  |
| Mitotic Spindle Checkpoint                                                                                          | 0.3125    | 1.06E-07 | 0.0982143 | 0.08086  | 0.0625    | 0.85671  |
| Translation initiation complex formation                                                                            | 0.3965517 | 1.35E-07 | 0.1724138 | 0.00248  | 0.2068966 | 0.00329  |
| Ribosomal scanning and start codon recognition                                                                      | 0.3965517 | 1.35E-07 | 0.1724138 | 0.00248  | 0.2068966 | 0.00329  |
| G2/M DNA damage checkpoint                                                                                          | 0.3263158 | 1.90E-07 | 0.1157895 | 0.03012  | 0.0842105 | 0.57631  |
| Activation of the mRNA upon binding of the cap-binding complex and eIFs, and subsequent binding to 43S              | 0.3898305 | 1.95E-07 | 0.1694915 | 0.00283  | 0.220339  | 0.00123  |
| CDC6 association with the ORC:origin complex                                                                        | 0.8181818 | 2.93E-07 | 0.5454545 | 1.82E-05 | 0.4545455 | 0.00137  |
| Respiratory electron transport, ATP synthesis by chemiosmotic coupling, and heat production by uncoupling proteins. | 0.2926829 | 4.33E-07 | 0.0813008 | 0.22037  | 0.1300813 | 0.061    |
| Dual Incision in GG-NER                                                                                             | 0.4390244 | 5.14E-07 | 0.195122  | 0.00298  | 0.1707317 | 0.05777  |
| Resolution of Sister Chromatid Cohesion                                                                             | 0.2903226 | 5.38E-07 | 0.0806452 | 0.22764  | 0.0403226 | 0.98479  |
| Lagging Strand Synthesis                                                                                            | 0.6       | 6.05E-07 | 0.45      | 1.04E-06 | 0.35      | 0.00096  |
| Transcriptional Regulation by TP53                                                                                  | 0.2136986 | 6.58E-07 | 0.1041096 | 0.00089  | 0.1178082 | 0.02016  |
| Amplification of signal from the kinetochores                                                                       | 0.3125    | 8.53E-07 | 0.09375   | 0.13254  | 0.0416667 | 0.97001  |
| Amplification of signal from unattached kinetochores via a MAD2 inhibitory signal                                   | 0.3125    | 8.53E-07 | 0.09375   | 0.13254  | 0.0416667 | 0.97001  |
| M Phase                                                                                                             | 0.2086514 | 9.54E-07 | 0.0508906 | 0.83564  | 0.043257  | 0.99971  |
| Mitotic Prometaphase                                                                                                | 0.2474747 | 1.13E-06 | 0.0707071 | 0.3271   | 0.0454545 | 0.99054  |
| Transcription-Coupled Nucleotide Excision Repair (TC-NER)                                                           | 0.3291139 | 1.52E-06 | 0.1265823 | 0.02178  | 0.164557  | 0.01637  |
| Mitotic Metaphase and Anaphase                                                                                      | 0.245     | 1.55E-06 | 0.065     | 0.45272  | 0.045     | 0.99149  |
| Dual incision in TC-NER                                                                                             | 0.3484848 | 1.99E-06 | 0.1363636 | 0.0185   | 0.1666667 | 0.02386  |
| mRNA Splicing                                                                                                       | 0.2460733 | 2.21E-06 | 0.052356  | 0.73988  | 0.0366492 | 0.9979   |
| Resolution of D-loop Structures through Holliday Junction Intermediates                                             | 0.4545455 | 2.70E-06 | 0.1818182 | 0.01378  | 0.1515152 | 0.14863  |
| tRNA processing                                                                                                     | 0.2924528 | 2.75E-06 | 0.1226415 | 0.01247  | 0.1037736 | 0.30022  |
| Mitochondrial Fatty Acid Beta-Oxidation                                                                             | 0.4324324 | 2.83E-06 | 0.1891892 | 0.00641  | 0.3243243 | 3.66E-05 |
| Mitotic Anaphase                                                                                                    | 0.241206  | 3.16E-06 | 0.0653266 | 0.44544  | 0.0452261 | 0.99103  |

|                                                                                     |           |          |           |          |           |         |
|-------------------------------------------------------------------------------------|-----------|----------|-----------|----------|-----------|---------|
| Resolution of D-loop Structures through Synthesis-Dependent Strand Annealing (SDSA) | 0.5       | 3.35E-06 | 0.2307692 | 0.00412  | 0.1923077 | 0.06686 |
| Regulation of TP53 Activity through Phosphorylation                                 | 0.3043478 | 3.52E-06 | 0.1413043 | 0.00382  | 0.1195652 | 0.16385 |
| mRNA Splicing - Major Pathway                                                       | 0.2459016 | 3.69E-06 | 0.0491803 | 0.79619  | 0.0382514 | 0.99659 |
| Resolution of D-Loop Structures                                                     | 0.4411765 | 4.29E-06 | 0.1764706 | 0.01589  | 0.1470588 | 0.16275 |
| Gap-filling DNA repair synthesis and ligation in TC-NER                             | 0.3384615 | 5.73E-06 | 0.1384615 | 0.01686  | 0.1846154 | 0.00853 |
| Recognition of DNA damage by PCNA-containing replication complex                    | 0.4516129 | 6.42E-06 | 0.2258065 | 0.00225  | 0.1935484 | 0.04531 |
| Nucleotide Excision Repair                                                          | 0.2792793 | 7.89E-06 | 0.1171171 | 0.01784  | 0.1261261 | 0.09278 |
| Separation of Sister Chromatids                                                     | 0.2393617 | 7.90E-06 | 0.0638298 | 0.48343  | 0.0425532 | 0.99323 |
| Fanconi Anemia Pathway                                                              | 0.4       | 9.61E-06 | 0.15      | 0.03334  | 0.15      | 0.12413 |
| Mitochondrial tRNA aminoacylation                                                   | 0.5238095 | 1.09E-05 | 0.2857143 | 0.00126  | 0.1904762 | 0.10004 |
| PCNA-Dependent Long Patch Base Excision Repair                                      | 0.5238095 | 1.09E-05 | 0.2857143 | 0.00126  | 0.2380952 | 0.02942 |
| Mismatch Repair                                                                     | 0.6       | 1.67E-05 | 0.2666667 | 0.01104  | 0.2       | 0.13224 |
| Processive synthesis on the lagging strand                                          | 0.6       | 1.67E-05 | 0.4666667 | 1.30E-05 | 0.3333333 | 0.00667 |
| Global Genome Nucleotide Excision Repair (GG-NER)                                   | 0.297619  | 1.78E-05 | 0.1309524 | 0.01306  | 0.1071429 | 0.29336 |
| E2F mediated regulation of DNA replication                                          | 0.5       | 1.94E-05 | 0.2727273 | 0.00165  | 0.2272727 | 0.03547 |
| Switching of origins to a post-replicative state                                    | 0.2888889 | 2.19E-05 | 0.1555556 | 0.00107  | 0.1333333 | 0.08277 |
| Resolution of AP sites via the multiple-nucleotide patch replacement pathway        | 0.4615385 | 2.27E-05 | 0.2307692 | 0.00412  | 0.1923077 | 0.06686 |
| Metabolism of nucleotides                                                           | 0.2772277 | 2.48E-05 | 0.1584158 | 0.00039  | 0.1683168 | 0.00526 |
| snRNP Assembly                                                                      | 0.3461538 | 2.84E-05 | 0.0961538 | 0.21124  | 0.0576923 | 0.83549 |
| Metabolism of non-coding RNA                                                        | 0.3461538 | 2.84E-05 | 0.0961538 | 0.21124  | 0.0576923 | 0.83549 |
| Branched-chain amino acid catabolism                                                | 0.4782609 | 3.31E-05 | 0.2173913 | 0.01132  | 0.3043478 | 0.00242 |
| Interactions of Rev with host cellular proteins                                     | 0.4       | 3.47E-05 | 0.0857143 | 0.36296  | 0.0571429 | 0.8152  |
| Protein localization                                                                | 0.2519685 | 5.47E-05 | 0.0629921 | 0.51915  | 0.1338583 | 0.0436  |
| Complex I biogenesis                                                                | 0.3272727 | 6.65E-05 | 0.0545455 | 0.66288  | 0.1272727 | 0.18972 |
| SUMOylation                                                                         | 0.2245989 | 7.74E-05 | 0.0855615 | 0.10938  | 0.0695187 | 0.82449 |
| Rev-mediated nuclear export of HIV RNA                                              | 0.3939394 | 7.97E-05 | 0.0909091 | 0.32877  | 0.0606061 | 0.78847 |
| Methylation                                                                         | 0.5714286 | 8.20E-05 | 0.2142857 | 0.0501   | 0.1428571 | 0.3412  |
| Mismatch repair (MMR) directed by MSH2:MSH6 (MutSalpha)                             | 0.5714286 | 8.20E-05 | 0.2857143 | 0.0085   | 0.2142857 | 0.11264 |
| Mismatch repair (MMR) directed by MSH2:MSH3 (MutSbeta)                              | 0.5714286 | 8.20E-05 | 0.2142857 | 0.0501   | 0.2142857 | 0.11264 |
| Removal of the Flap Intermediate                                                    | 0.5714286 | 8.20E-05 | 0.4285714 | 0.0001   | 0.2857143 | 0.02688 |

|                                                                  |           |          |           |         |           |         |
|------------------------------------------------------------------|-----------|----------|-----------|---------|-----------|---------|
| Gap-filling DNA repair synthesis and ligation in GG-NER          | 0.44      | 8.61E-05 | 0.2       | 0.01616 | 0.2       | 0.05792 |
| Viral Messenger RNA Synthesis                                    | 0.3571429 | 8.67E-05 | 0.0952381 | 0.25437 | 0.1190476 | 0.29081 |
| SUMOylation of DNA damage response and repair proteins           | 0.2894737 | 8.89E-05 | 0.1052632 | 0.0922  | 0.0526316 | 0.90109 |
| rRNA modification in the nucleus and cytosol                     | 0.3064516 | 0.00011  | 0.0967742 | 0.1774  | 0.0645161 | 0.79085 |
| NEP/NS2 Interacts with the Cellular Export Machinery             | 0.4       | 0.00013  | 0.1       | 0.27751 | 0.0666667 | 0.742   |
| Base Excision Repair                                             | 0.3589744 | 0.00014  | 0.2307692 | 0.00046 | 0.2307692 | 0.00489 |
| Resolution of Abasic Sites (AP sites)                            | 0.3589744 | 0.00014  | 0.2307692 | 0.00046 | 0.2307692 | 0.00489 |
| Regulation of HSF1-mediated heat shock response                  | 0.2941176 | 0.00014  | 0.0588235 | 0.60514 | 0.0882353 | 0.5345  |
| Assembly of the pre-replicative complex                          | 0.2941176 | 0.00014  | 0.1911765 | 0.00021 | 0.1617647 | 0.02916 |
| Peroxisomal protein import                                       | 0.3015873 | 0.00015  | 0.047619  | 0.7501  | 0.2063492 | 0.00231 |
| Nucleobase biosynthesis                                          | 0.5333333 | 0.00016  | 0.3333333 | 0.00152 | 0.3333333 | 0.00667 |
| SUMO E3 ligases SUMOylate target proteins                        | 0.2209945 | 0.00016  | 0.0828729 | 0.14292 | 0.0718232 | 0.78849 |
| DNA Damage Bypass                                                | 0.3265306 | 0.00017  | 0.1836735 | 0.00258 | 0.1428571 | 0.12336 |
| Deposition of new CENPA-containing nucleosomes at the centromere | 0.2837838 | 0.00017  | 0.0405405 | 0.83941 | 0.027027  | 0.98981 |
| Nucleosome assembly                                              | 0.2837838 | 0.00017  | 0.0405405 | 0.83941 | 0.027027  | 0.98981 |
| Meiosis                                                          | 0.2457627 | 0.00019  | 0.0508475 | 0.73669 | 0.059322  | 0.89002 |
| G0 and Early G1                                                  | 0.4074074 | 0.0002   | 0.2962963 | 0.00015 | 0.1481481 | 0.19751 |
| DNA Damage/Telomere Stress Induced Senescence                    | 0.275     | 0.0002   | 0.0375    | 0.8754  | 0.0625    | 0.82789 |
| TP53 Regulates Transcription of DNA Repair Genes                 | 0.2923077 | 0.00023  | 0.1230769 | 0.04382 | 0.1384615 | 0.10224 |
| Pyruvate metabolism and Citric Acid (TCA) cycle                  | 0.3090909 | 0.00023  | 0.1090909 | 0.1182  | 0.1636364 | 0.0431  |
| Transport of Mature mRNAs Derived from Intronless Transcripts    | 0.3414634 | 0.00026  | 0.0731707 | 0.46298 | 0.0487805 | 0.87815 |
| Export of Viral Ribonucleoproteins from Nucleus                  | 0.375     | 0.00026  | 0.09375   | 0.31165 | 0.09375   | 0.5262  |
| Nuclear import of Rev protein                                    | 0.375     | 0.00026  | 0.09375   | 0.31165 | 0.0625    | 0.77386 |
| Termination of translesion DNA synthesis                         | 0.375     | 0.00026  | 0.1875    | 0.01187 | 0.15625   | 0.13505 |
| Orc1 removal from chromatin                                      | 0.2816901 | 0.00027  | 0.1690141 | 0.00114 | 0.1267606 | 0.1527  |
| RHO GTPases Activate Formins                                     | 0.2318841 | 0.00029  | 0.0652174 | 0.47187 | 0.0362319 | 0.99367 |
| tRNA processing in the nucleus                                   | 0.3035714 | 0.00029  | 0.0892857 | 0.25716 | 0.1071429 | 0.34846 |
| Cellular response to heat stress                                 | 0.2613636 | 0.00033  | 0.0568182 | 0.63248 | 0.0795455 | 0.63958 |
| mRNA Splicing - Minor Pathway                                    | 0.3076923 | 0.00037  | 0.0576923 | 0.62497 | 0.0769231 | 0.66342 |
| Translesion synthesis by POLI                                    | 0.4705882 | 0.00047  | 0.2941176 | 0.00282 | 0.2352941 | 0.05208 |
| Transport of the SLBP Dependant Mature mRNA                      | 0.3529412 | 0.0005   | 0.0882353 | 0.34589 | 0.0588235 | 0.80223 |
| Nuclear Pore Complex (NPC) Disassembly                           | 0.3529412 | 0.0005   | 0.0882353 | 0.34589 | 0.0588235 | 0.80223 |

|                                                                      |           |         |           |          |           |         |
|----------------------------------------------------------------------|-----------|---------|-----------|----------|-----------|---------|
| Transport of Ribonucleoproteins into the Host Nucleus                | 0.3666667 | 0.00059 | 0.1       | 0.27751  | 0.0666667 | 0.742   |
| Regulation of Glucokinase by Glucokinase Regulatory Protein          | 0.3666667 | 0.00059 | 0.1       | 0.27751  | 0.0666667 | 0.742   |
| Calnexin/calreticulin cycle                                          | 0.3846154 | 0.00067 | 0.0384615 | 0.80684  | 0.1153846 | 0.38857 |
| N-glycan trimming in the ER and Calnexin/Calreticulin cycle          | 0.3428571 | 0.00067 | 0.0571429 | 0.64067  | 0.1428571 | 0.17739 |
| Polymerase switching on the C-strand of the telomere                 | 0.5       | 0.00069 | 0.3571429 | 0.00106  | 0.2857143 | 0.02688 |
| Polymerase switching                                                 | 0.5       | 0.00069 | 0.3571429 | 0.00106  | 0.2857143 | 0.02688 |
| Leading Strand Synthesis                                             | 0.5       | 0.00069 | 0.3571429 | 0.00106  | 0.2857143 | 0.02688 |
| Transport of Mature mRNA Derived from an Intronless Transcript       | 0.325     | 0.00073 | 0.075     | 0.44672  | 0.05      | 0.86925 |
| Defects in vitamin and cofactor metabolism                           | 0.4090909 | 0.00074 | 0.1363636 | 0.14852  | 0.1818182 | 0.11439 |
| Pyruvate metabolism                                                  | 0.3548387 | 0.00081 | 0.0645161 | 0.57396  | 0.1935484 | 0.04531 |
| Diseases of metabolism                                               | 0.2380952 | 0.00085 | 0.1333333 | 0.00467  | 0.152381  | 0.01685 |
| Glutathione conjugation                                              | 0.3333333 | 0.0009  | 0.1666667 | 0.02076  | 0.25      | 0.00274 |
| Mitotic Prophase                                                     | 0.2198582 | 0.00094 | 0.0283688 | 0.97641  | 0.035461  | 0.99478 |
| Processive synthesis on the C-strand of the telomere                 | 0.5454545 | 0.00095 | 0.4545455 | 0.00029  | 0.3636364 | 0.0109  |
| SeMet incorporation into proteins                                    | 0.5454545 | 0.00095 | 0.2727273 | 0.02602  | 0.1818182 | 0.24253 |
| mitochondrial fatty acid beta-oxidation of saturated fatty acids     | 0.5454545 | 0.00095 | 0.3636364 | 0.00325  | 0.4545455 | 0.00137 |
| Nuclear Envelope Breakdown                                           | 0.2941176 | 0.00095 | 0.0784314 | 0.38084  | 0.0588235 | 0.82557 |
| Regulation of TP53 Activity                                          | 0.2125    | 0.00103 | 0.09375   | 0.06535  | 0.09375   | 0.39985 |
| Vpr-mediated nuclear import of PICs                                  | 0.34375   | 0.00109 | 0.09375   | 0.31165  | 0.0625    | 0.77386 |
| Translesion Synthesis by POLH                                        | 0.4210526 | 0.00116 | 0.2631579 | 0.00479  | 0.2631579 | 0.01939 |
| Transcription of E2F targets under negative control by DREAM complex | 0.4210526 | 0.00116 | 0.4210526 | 7.80E-06 | 0.2105263 | 0.07409 |
| Transport of the SLBP independent Mature mRNA                        | 0.3333333 | 0.00146 | 0.0909091 | 0.32877  | 0.0606061 | 0.78847 |
| SUMOylation of SUMOylation proteins                                  | 0.3333333 | 0.00146 | 0.0909091 | 0.32877  | 0.0606061 | 0.78847 |
| Meiotic recombination                                                | 0.244186  | 0.00153 | 0.0465116 | 0.78019  | 0.0581395 | 0.87164 |
| Cytosolic tRNA aminoacylation                                        | 0.375     | 0.00154 | 0.1666667 | 0.05567  | 0.0833333 | 0.62285 |
| Formation of Incision Complex in GG-NER                              | 0.3023256 | 0.00155 | 0.1395349 | 0.04544  | 0.0930233 | 0.51079 |
| Purine ribonucleoside monophosphate biosynthesis                     | 0.5       | 0.0017  | 0.3333333 | 0.00463  | 0.3333333 | 0.01525 |
| Metabolism of cofactors                                              | 0.4       | 0.00173 | 0.2       | 0.03074  | 0.3       | 0.00534 |
| SUMOylation of chromatin organization proteins                       | 0.2571429 | 0.00174 | 0.0571429 | 0.62818  | 0.0714286 | 0.72907 |
| Formation of TC-NER Pre-Incision Complex                             | 0.2777778 | 0.00181 | 0.0740741 | 0.42307  | 0.1481481 | 0.08817 |
| Translesion synthesis by REV1                                        | 0.4375    | 0.00183 | 0.25      | 0.01401  | 0.25      | 0.04262 |

|                                                                                                          |           |         |           |         |           |         |
|----------------------------------------------------------------------------------------------------------|-----------|---------|-----------|---------|-----------|---------|
| Transcription of E2F targets under negative control by p107 (RBL1) and p130 (RBL2) in complex with HDAC1 | 0.4375    | 0.00183 | 0.3125    | 0.0021  | 0.125     | 0.40484 |
| Transcriptional regulation by small RNAs                                                                 | 0.2285714 | 0.00195 | 0.0380952 | 0.89182 | 0.0571429 | 0.89691 |
| Translesion synthesis by Y family DNA polymerases bypasses lesions on DNA template                       | 0.3076923 | 0.00197 | 0.1538462 | 0.02982 | 0.1282051 | 0.24028 |
| Transport of Mature Transcript to Cytoplasm                                                              | 0.2409639 | 0.00233 | 0.060241  | 0.58012 | 0.0361446 | 0.9778  |
| Interactions of Vpr with host cellular proteins                                                          | 0.3142857 | 0.00249 | 0.0857143 | 0.36296 | 0.0571429 | 0.8152  |
| ER Quality Control Compartment (ERQC)                                                                    | 0.3809524 | 0.0025  | NA        | NA      | 0.0952381 | 0.54891 |
| Deadenylation-dependent mRNA decay                                                                       | 0.2678571 | 0.00267 | NA        | NA      | 0.1071429 | 0.34846 |
| Reproduction                                                                                             | 0.2083333 | 0.00272 | 0.0416667 | 0.88205 | 0.0555556 | 0.93513 |
| Translesion synthesis by POLK                                                                            | 0.4117647 | 0.00278 | 0.2352941 | 0.01746 | 0.2352941 | 0.05208 |
| HIV Life Cycle                                                                                           | 0.205298  | 0.00296 | 0.0794702 | 0.21401 | 0.0794702 | 0.65351 |
| Phase II - Conjugation of compounds                                                                      | 0.2201835 | 0.0033  | 0.1192661 | 0.01552 | 0.1559633 | 0.01126 |
| Cellular responses to stress                                                                             | 0.1690141 | 0.00341 | 0.0446009 | 0.9464  | 0.0633803 | 0.96672 |
| RNA Polymerase I Transcription Initiation                                                                | 0.2765957 | 0.00372 | 0.0851064 | 0.32414 | 0.0638298 | 0.78061 |
| SUMOylation of ubiquitylation proteins                                                                   | 0.2972973 | 0.00404 | 0.0810811 | 0.39687 | 0.0540541 | 0.83887 |
| Removal of the Flap Intermediate from the C-strand                                                       | 0.5       | 0.00427 | 0.4       | 0.00217 | 0.3       | 0.04789 |
| RNA Polymerase I Transcription                                                                           | 0.2142857 | 0.00475 | 0.0446429 | 0.82354 | 0.0446429 | 0.96885 |
| tRNA modification in the nucleus and cytosol                                                             | 0.2790698 | 0.00483 | 0.1860465 | 0.00406 | 0.1162791 | 0.30807 |
| Cellular Senescence                                                                                      | 0.1897436 | 0.00509 | 0.0512821 | 0.7626  | 0.0666667 | 0.8651  |
| Processing of Capped Intronless Pre-mRNA                                                                 | 0.3214286 | 0.00513 | 0.0357143 | 0.82982 | NA        | NA      |
| Fatty acid metabolism                                                                                    | 0.1920904 | 0.0058  | 0.0960452 | 0.04323 | 0.1581921 | 0.00111 |
| SUMOylation of DNA replication proteins                                                                  | 0.2727273 | 0.00591 | 0.0909091 | 0.28198 | 0.0681818 | 0.74095 |
| NS1 Mediated Effects on Host Pathways                                                                    | 0.2820513 | 0.00628 | 0.1025641 | 0.21415 | 0.0512821 | 0.85976 |
| mRNA decay by 5' to 3' exoribonuclease                                                                   | 0.4       | 0.00663 | NA        | NA      | 0.1333333 | 0.37335 |
| RNA Polymerase I Promoter Clearance                                                                      | 0.2110092 | 0.00685 | 0.0366972 | 0.90771 | 0.0366972 | 0.98697 |
| Meiotic synapsis                                                                                         | 0.2278481 | 0.00703 | 0.0379747 | 0.86994 | 0.0506329 | 0.91661 |
| Establishment of Sister Chromatid Cohesion                                                               | 0.4545455 | 0.00703 | 0.0909091 | 0.50099 | 0.0909091 | 0.6276  |
| Condensation of Prometaphase Chromosomes                                                                 | 0.4545455 | 0.00703 | NA        | NA      | 0.0909091 | 0.6276  |
| SLBP Dependent Processing of Replication-Dependent Histone Pre-mRNAs                                     | 0.4545455 | 0.00703 | NA        | NA      | NA        | NA      |
| Gene Silencing by RNA                                                                                    | 0.2       | 0.00762 | 0.037037  | 0.92238 | 0.0444444 | 0.97881 |
| Epigenetic regulation of gene expression                                                                 | 0.1959459 | 0.00781 | 0.0472973 | 0.80903 | 0.0337838 | 0.99669 |



|                                                                                                                             |           |         |           |         |           |         |
|-----------------------------------------------------------------------------------------------------------------------------|-----------|---------|-----------|---------|-----------|---------|
| Inhibition of the proteolytic activity of APC/C required for the onset of anaphase by mitotic spindle checkpoint components | 0.35      | 0.00792 | 0.15      | 0.12005 | 0.2       | 0.08659 |
| Inactivation of APC/C via direct inhibition of the APC/C complex                                                            | 0.35      | 0.00792 | 0.15      | 0.12005 | 0.2       | 0.08659 |
| Transport of Mature mRNA derived from an Intron-Containing Transcript                                                       | 0.2297297 | 0.00795 | 0.0675676 | 0.47696 | 0.0405405 | 0.95905 |
| APC-Cdc20 mediated degradation of Nek2A                                                                                     | 0.32      | 0.00844 | 0.12      | 0.19469 | 0.16      | 0.16224 |
| Interconversion of nucleotide di- and triphosphates                                                                         | 0.3       | 0.00846 | 0.2       | 0.00863 | 0.2       | 0.03929 |
| SUMOylation of RNA binding proteins                                                                                         | 0.2608696 | 0.00863 | 0.0869565 | 0.31002 | 0.0652174 | 0.76798 |
| Nonhomologous End-Joining (NHEJ)                                                                                            | 0.2318841 | 0.00899 | 0.057971  | 0.61677 | 0.0289855 | 0.98494 |
| Metabolism of vitamins and cofactors                                                                                        | 0.1851852 | 0.00925 | 0.0793651 | 0.18202 | 0.1587302 | 0.00071 |
| Apoptotic execution phase                                                                                                   | 0.25      | 0.00933 | 0.0384615 | 0.83622 | 0.0769231 | 0.66342 |
| Host Interactions with Influenza Factors                                                                                    | 0.2682927 | 0.00939 | 0.097561  | 0.24078 | 0.0487805 | 0.87815 |
| Formation of Senescence-Associated Heterochromatin Foci (SAHF)                                                              | 0.375     | 0.00952 | 0.0625    | 0.63627 | 0.0625    | 0.76239 |
| Positive epigenetic regulation of rRNA expression                                                                           | 0.2075472 | 0.00981 | 0.0377358 | 0.896   | 0.0377358 | 0.98415 |
| Late Phase of HIV Life Cycle                                                                                                | 0.1956522 | 0.01022 | 0.0652174 | 0.47187 | 0.0724638 | 0.75723 |
| Glyoxylate metabolism and glycine degradation                                                                               | 0.2903226 | 0.01064 | 0.1612903 | 0.03829 | 0.1612903 | 0.12205 |
| Tetrahydrobiopterin (BH4) synthesis, recycling, salvage and regulation                                                      | 0.4166667 | 0.01084 | 0.25      | 0.03315 | 0.3333333 | 0.01525 |
| Ethanol oxidation                                                                                                           | 0.4166667 | 0.01084 | 0.3333333 | 0.00463 | 0.1666667 | 0.27558 |
| Cyclin E associated events during G1/S transition                                                                           | 0.2168675 | 0.01183 | 0.1084337 | 0.0664  | 0.0481928 | 0.93391 |
| RNA Polymerase I Chain Elongation                                                                                           | 0.2111111 | 0.01314 | 0.0333333 | 0.9197  | 0.0444444 | 0.95655 |
| Metabolism of nitric oxide                                                                                                  | 0.3529412 | 0.01319 | 0.1764706 | 0.0818  | 0.2941176 | 0.01191 |
| eNOS activation and regulation                                                                                              | 0.3529412 | 0.01319 | 0.1764706 | 0.0818  | 0.2941176 | 0.01191 |
| RNA Polymerase I Transcription Termination                                                                                  | 0.28125   | 0.01321 | 0.0625    | 0.59145 | 0.0625    | 0.77386 |
| RNA Pol II CTD phosphorylation and interaction with CE during HIV infection                                                 | 0.2962963 | 0.01384 | 0.0740741 | 0.49868 | 0.1481481 | 0.19751 |
| RNA Pol II CTD phosphorylation and interaction with CE                                                                      | 0.2962963 | 0.01384 | 0.0740741 | 0.49868 | 0.1481481 | 0.19751 |
| Citric acid cycle (TCA cycle)                                                                                               | 0.3181818 | 0.01397 | 0.1363636 | 0.14852 | 0.0909091 | 0.57465 |
| Cyclin A:Cdk2-associated events at S phase entry                                                                            | 0.2117647 | 0.01505 | 0.1058824 | 0.07485 | 0.0470588 | 0.94129 |
| Metabolism of water-soluble vitamins and cofactors                                                                          | 0.195122  | 0.01534 | 0.0569106 | 0.63355 | 0.1544715 | 0.00847 |
| Cleavage of Growing Transcript in the Termination Region                                                                    | 0.2238806 | 0.01546 | 0.0447761 | 0.78642 | 0.0149254 | 0.9976  |
| RNA Polymerase II Transcription Termination                                                                                 | 0.2238806 | 0.01546 | 0.0447761 | 0.78642 | 0.0149254 | 0.9976  |

|                                                                                                           |           |         |           |         |           |          |
|-----------------------------------------------------------------------------------------------------------|-----------|---------|-----------|---------|-----------|----------|
| Biological oxidations                                                                                     | 0.1748879 | 0.01582 | 0.1210762 | 0.00052 | 0.1524664 | 0.00068  |
| Apoptosis induced DNA fragmentation                                                                       | 0.3846154 | 0.01584 | NA        | NA      | NA        | NA       |
| The activation of arylsulfatases                                                                          | 0.3846154 | 0.01584 | 0.3846154 | 0.00072 | 0.3846154 | 0.00331  |
| eNOS activation                                                                                           | 0.3846154 | 0.01584 | 0.2307692 | 0.04118 | 0.3076923 | 0.02057  |
| Activation of DNA fragmentation factor                                                                    | 0.3846154 | 0.01584 | NA        | NA      | NA        | NA       |
| Synthesis of PC                                                                                           | 0.2857143 | 0.01732 | 0.1785714 | 0.02572 | 0.2142857 | 0.02883  |
| Synthesis of IP3 and IP4 in the cytosol                                                                   | 0.2857143 | 0.01732 | 0.2142857 | 0.00607 | 0.25      | 0.008    |
| Condensation of Prophase Chromosomes                                                                      | 0.2162162 | 0.01749 | NA        | NA      | 0.0135135 | 0.99873  |
| RNA Polymerase III Chain Elongation                                                                       | 0.3333333 | 0.01776 | 0.0555556 | 0.6795  | 0.1666667 | 0.19693  |
| Protein folding                                                                                           | 0.2020202 | 0.01781 | 0.0505051 | 0.73264 | 0.0707071 | 0.75686  |
| Gamma carboxylation, hypusine formation and arylsulfatase activation                                      | 0.2564103 | 0.0179  | 0.1794872 | 0.00861 | 0.2307692 | 0.00489  |
| Association of TriC/CCT with target proteins during biosynthesis                                          | 0.2564103 | 0.0179  | 0.0512821 | 0.69888 | 0.0512821 | 0.85976  |
| APC/C:Cdc20 mediated degradation of Cyclin B                                                              | 0.3043478 | 0.01798 | 0.0869565 | 0.41541 | 0.1304348 | 0.31586  |
| BBSome-mediated cargo-targeting to cilium                                                                 | 0.3043478 | 0.01798 | 0.0869565 | 0.41541 | 0.0869565 | 0.59929  |
| Mitochondrial calcium ion transport                                                                       | 0.3043478 | 0.01798 | 0.0434783 | 0.76644 | NA        | NA       |
| RHO GTPase Effectors                                                                                      | 0.164557  | 0.01898 | 0.0348101 | 0.9879  | 0.0379747 | 0.99979  |
| NoRC negatively regulates rRNA expression                                                                 | 0.1981132 | 0.01904 | 0.0377358 | 0.896   | 0.0377358 | 0.98415  |
| Metabolism of carbohydrates                                                                               | 0.1672727 | 0.02011 | 0.1127273 | 0.00071 | 0.1781818 | 5.89E-07 |
| Peroxisomal lipid metabolism                                                                              | 0.2758621 | 0.02139 | 0.1034483 | 0.26057 | 0.2068966 | 0.0338   |
| Mitophagy                                                                                                 | 0.2758621 | 0.02139 | 0.0689655 | 0.53738 | 0.0689655 | 0.72467  |
| mRNA Capping                                                                                              | 0.2758621 | 0.02139 | 0.0689655 | 0.53738 | 0.137931  | 0.23483  |
| Glycogen metabolism                                                                                       | 0.2758621 | 0.02139 | 0.1724138 | 0.02957 | 0.2413793 | 0.00978  |
| Defects in cobalamin (B12) metabolism                                                                     | 0.3571429 | 0.02218 | NA        | NA      | 0.1428571 | 0.3412   |
| TP53 Regulates Transcription of Genes Involved in G1 Cell Cycle Arrest                                    | 0.3571429 | 0.02218 | 0.1428571 | 0.20994 | 0.1428571 | 0.3412   |
| Recruitment and ATM-mediated phosphorylation of repair and signaling proteins at DNA double strand breaks | 0.2105263 | 0.02225 | 0.0526316 | 0.69198 | 0.0526316 | 0.90109  |
| Glycolysis                                                                                                | 0.2142857 | 0.02267 | 0.0714286 | 0.42844 | 0.1       | 0.39507  |
| Phosphorylation of the APC/C                                                                              | 0.3157895 | 0.02329 | 0.1052632 | 0.32578 | 0.1578947 | 0.21996  |
| Protein methylation                                                                                       | 0.3157895 | 0.02329 | 0.2105263 | 0.02581 | 0.1052632 | 0.49424  |
| Transcriptional Regulation by E2F6                                                                        | 0.2571429 | 0.02369 | 0.1714286 | 0.01822 | 0.1428571 | 0.17739  |
| DNA Double Strand Break Response                                                                          | 0.2077922 | 0.02496 | 0.0519481 | 0.70182 | 0.0519481 | 0.90652  |

|                                                                 |           |         |           |         |           |         |
|-----------------------------------------------------------------|-----------|---------|-----------|---------|-----------|---------|
| Negative epigenetic regulation of rRNA expression               | 0.1926606 | 0.02544 | 0.0366972 | 0.90771 | 0.0366972 | 0.98697 |
| RNA Polymerase I Promoter Escape                                | 0.2666667 | 0.0261  | 0.0666667 | 0.55594 | 0.0666667 | 0.742   |
| SLBP independent Processing of Histone Pre-mRNAs                | 0.4       | 0.02662 | NA        | NA      | NA        | NA      |
| Cohesin Loading onto Chromatin                                  | 0.4       | 0.02662 | 0.1       | 0.46842 | NA        | NA      |
| Folding of actin by CCT/TriC                                    | 0.4       | 0.02662 | NA        | NA      | NA        | NA      |
| HDR through MMEJ (alt-NHEJ)                                     | 0.4       | 0.02662 | 0.2       | 0.12152 | 0.1       | 0.59259 |
| Ketone body metabolism                                          | 0.4       | 0.02662 | 0.3       | 0.01981 | 0.4       | 0.00743 |
| Pentose phosphate pathway                                       | 0.3333333 | 0.02995 | 0.2       | 0.05987 | 0.4       | 0.001   |
| Neutrophil degranulation                                        | 0.1524008 | 0.03375 | 0.0542797 | 0.76838 | 0.1210856 | 0.0044  |
| TP53 Regulates Transcription of Cell Cycle Genes                | 0.2244898 | 0.03454 | 0.122449  | 0.07697 | 0.1020408 | 0.41318 |
| Cellular responses to external stimuli                          | 0.1510934 | 0.03657 | 0.0437376 | 0.96671 | 0.0596421 | 0.99003 |
| Biotin transport and metabolism                                 | 0.3636364 | 0.03782 | 0.2727273 | 0.02602 | 0.1818182 | 0.24253 |
| Apoptotic cleavage of cell adhesion proteins                    | 0.3636364 | 0.03782 | 0.0909091 | 0.50099 | 0.0909091 | 0.6276  |
| Organelle biogenesis and maintenance                            | 0.1598639 | 0.03881 | 0.0544218 | 0.72379 | 0.0680272 | 0.89016 |
| Apoptotic cleavage of cellular proteins                         | 0.2368421 | 0.03904 | 0.0526316 | 0.68511 | 0.1052632 | 0.41387 |
| mRNA decay by 3' to 5' exoribonuclease                          | 0.3125    | 0.03925 | NA        | NA      | 0.125     | 0.40484 |
| Processing of SMDT1                                             | 0.3125    | 0.03925 | NA        | NA      | NA        | NA      |
| ERCC6 (CSB) and EHMT2 (G9a) positively regulate rRNA expression | 0.1973684 | 0.04425 | 0.0394737 | 0.8523  | 0.0394737 | 0.96419 |
| Formation of the Early Elongation Complex                       | 0.2424242 | 0.04439 | 0.0606061 | 0.6084  | 0.1212121 | 0.31342 |
| Formation of the HIV-1 Early Elongation Complex                 | 0.2424242 | 0.04439 | 0.0606061 | 0.6084  | 0.1212121 | 0.31342 |
| Pink/Parkin Mediated Mitophagy                                  | 0.2727273 | 0.04643 | 0.0909091 | 0.3935  | 0.0454545 | 0.86147 |
| Mitochondrial protein import                                    | 0.203125  | 0.04786 | 0.078125  | 0.35435 | 0.0625    | 0.81106 |
| Signaling by Nuclear Receptors                                  | 0.1658291 | 0.04846 | 0.0351759 | 0.96422 | 0.0753769 | 0.73902 |
| Glucose metabolism                                              | 0.1888889 | 0.0488  | 0.0777778 | 0.31243 | 0.1222222 | 0.14738 |
| Cyclin D associated events in G1                                | 0.2045455 | 0.08714 | 0.2272727 | 0.00026 | 0.1590909 | 0.07907 |
| G1 Phase                                                        | 0.2045455 | 0.08714 | 0.2272727 | 0.00026 | 0.1590909 | 0.07907 |
| Neurotransmitter clearance                                      | 0.2       | 0.357   | 0.4       | 0.00217 | 0.1       | 0.59259 |
| Nitric oxide stimulates guanylate cyclase                       | 0.0416667 | 0.95838 | 0.25      | 0.00267 | 0.125     | 0.34019 |
| Glycosphingolipid metabolism                                    | 0.1956522 | 0.10867 | 0.173913  | 0.00622 | 0.2391304 | 0.00142 |
| HS-GAG degradation                                              | 0.0909091 | 0.77649 | 0.2272727 | 0.00932 | 0.1818182 | 0.11439 |
| Nuclear Receptor transcription pathway                          | 0.12      | 0.59818 | 0.16      | 0.01032 | 0.16      | 0.0612  |
| Diseases of carbohydrate metabolism                             | 0.1764706 | 0.23979 | 0.1764706 | 0.01589 | 0.2058824 | 0.02319 |
| Amino acid synthesis and interconversion (transamination)       | 0.1764706 | 0.23979 | 0.1764706 | 0.01589 | 0.2647059 | 0.00178 |

|                                                                      |           |         |           |         |           |         |
|----------------------------------------------------------------------|-----------|---------|-----------|---------|-----------|---------|
| Base-Excision Repair, AP Site Formation                              | 0.2       | 0.357   | 0.3       | 0.01981 | 0.4       | 0.00743 |
| cGMP effects                                                         | NA        | NA      | 0.2222222 | 0.02138 | 0.0555556 | 0.80149 |
| Glycogen breakdown (glycogenolysis)                                  | 0.2777778 | 0.06254 | 0.2222222 | 0.02138 | 0.3333333 | 0.00297 |
| Calmodulin induced events                                            | 0.1428571 | 0.46369 | 0.1785714 | 0.02572 | 0.1071429 | 0.43604 |
| CaM pathway                                                          | 0.1428571 | 0.46369 | 0.1785714 | 0.02572 | 0.1071429 | 0.43604 |
| PKA activation                                                       | 0.2105263 | 0.20225 | 0.2105263 | 0.02581 | 0.1578947 | 0.21996 |
| Creatine metabolism                                                  | 0.1818182 | 0.40371 | 0.2727273 | 0.02602 | 0.3636364 | 0.0109  |
| Glycerophospholipid biosynthesis                                     | 0.1705426 | 0.07355 | 0.1085271 | 0.02607 | 0.1472868 | 0.01384 |
| Phase I - Functionalization of compounds                             | 0.1308411 | 0.4575  | 0.1121495 | 0.03015 | 0.1495327 | 0.01989 |
| PKA-mediated phosphorylation of CREB                                 | 0.2       | 0.22978 | 0.2       | 0.03074 | 0.15      | 0.2435  |
| Inositol phosphate metabolism                                        | 0.2       | 0.08355 | 0.14      | 0.03143 | 0.16      | 0.0612  |
| Miscellaneous substrates                                             | NA        | NA      | 0.25      | 0.03315 | 0.1666667 | 0.27558 |
| Repression of WNT target genes                                       | 0.0833333 | 0.7958  | 0.25      | 0.03315 | 0.0833333 | 0.6596  |
| Ca-dependent events                                                  | 0.1333333 | 0.51969 | 0.1666667 | 0.03376 | 0.1       | 0.48205 |
| TP53 Regulates Metabolic Genes                                       | 0.1744186 | 0.10669 | 0.1162791 | 0.03668 | 0.1162791 | 0.2012  |
| Inhibition of replication initiation of damaged DNA by RB1/E2F1      | 0.3076923 | 0.06706 | 0.2307692 | 0.04118 | 0.2307692 | 0.09426 |
| alpha-linolenic (omega3) and linoleic (omega6) acid metabolism       | 0.1538462 | 0.49176 | 0.2307692 | 0.04118 | 0.0769231 | 0.68886 |
| alpha-linolenic acid (ALA) metabolism                                | 0.1538462 | 0.49176 | 0.2307692 | 0.04118 | 0.0769231 | 0.68886 |
| Sphingolipid metabolism                                              | 0.1797753 | 0.07925 | 0.1123596 | 0.04484 | 0.2022472 | 0.00047 |
| Metabolism of lipids                                                 | 0.1316147 | 0.27221 | 0.0719132 | 0.12086 | 0.1248304 | 0.00013 |
| Synthesis of bile acids and bile salts                               | 0.1764706 | 0.23979 | 0.0882353 | 0.34589 | 0.2647059 | 0.00178 |
| Bile acid and bile salt metabolism                                   | 0.1395349 | 0.44534 | 0.0697674 | 0.49484 | 0.2325581 | 0.00289 |
| O-linked glycosylation of mucins                                     | 0.140625  | 0.39699 | 0.109375  | 0.09499 | 0.1875    | 0.00753 |
| SLC-mediated transmembrane transport                                 | 0.1097561 | 0.77984 | 0.0731707 | 0.24862 | 0.1300813 | 0.01146 |
| Metabolism of folate and pterines                                    | 0.2352941 | 0.15062 | 0.1176471 | 0.27951 | 0.2941176 | 0.01191 |
| Diseases associated with N-glycosylation of proteins                 | 0.2941176 | 0.0501  | 0.0588235 | 0.65857 | 0.2941176 | 0.01191 |
| Defective C1GALT1C1 causes Tn polyagglutination syndrome (TNPS)      | 0.1176471 | 0.6411  | 0.1176471 | 0.27951 | 0.2941176 | 0.01191 |
| Defective GALNT12 causes colorectal cancer 1 (CRCS1)                 | 0.1176471 | 0.6411  | 0.1176471 | 0.27951 | 0.2941176 | 0.01191 |
| Synthesis of bile acids and bile salts via 7alpha-hydroxycholesterol | 0.125     | 0.58591 | 0.0833333 | 0.43691 | 0.25      | 0.0138  |
| Diseases of glycosylation                                            | 0.0942029 | 0.88772 | 0.057971  | 0.61472 | 0.1449275 | 0.01393 |

|                                                                                                                       |           |         |           |         |           |         |
|-----------------------------------------------------------------------------------------------------------------------|-----------|---------|-----------|---------|-----------|---------|
| Keratan sulfate degradation                                                                                           | 0.2307692 | 0.21208 | 0.0769231 | 0.56027 | 0.3076923 | 0.02057 |
| Asparagine N-linked glycosylation                                                                                     | 0.1390728 | 0.23221 | 0.0397351 | 0.96259 | 0.1192053 | 0.02697 |
| Sulfur amino acid metabolism                                                                                          | 0.2142857 | 0.12451 | 0.1428571 | 0.08876 | 0.2142857 | 0.02883 |
| Cellular hexose transport                                                                                             | 0.0952381 | 0.75361 | 0.0952381 | 0.37123 | 0.2380952 | 0.02942 |
| Biosynthesis of the N-glycan precursor (dolichol lipid-linked oligosaccharide, LLO) and transfer to a nascent protein | 0.1410256 | 0.37211 | 0.0641026 | 0.52403 | 0.1538462 | 0.03321 |
| Diseases associated with glycosylation precursor biosynthesis                                                         | 0.1333333 | 0.57114 | 0.0666667 | 0.61252 | 0.2666667 | 0.03423 |
| Acetylcholine regulates insulin secretion                                                                             | 0.1       | 0.73386 | 0.1       | 0.46842 | 0.3       | 0.04789 |
| Cytosolic sulfonation of small molecules                                                                              | 0.0833333 | 0.81673 | 0.1666667 | 0.05567 | 0.2083333 | 0.04971 |

**Table S4B. Enriched Reactome pathways from down-regulated genes at 8h pi.** Significant Reactome pathways using down-regulated DEGs from STM, T3SS-1<sup>mut</sup> or T3SS-2<sup>mut</sup>-infected HIOs at 8h.
