# Supplementary material for: Salmonella enterica Serovar Typhimurium SPI-1 and SPI-2 Shape the Global Transcriptional Landscape in a Human Intestinal Organoid Model System
Source: PubMed Central journal article supplement (PMC8262845; doi:10.1128/mbio.00399-21), 2021-05-18
Supplement: mbio.00399-21-st005.pdf [file mbio.00399-21-st005.pdf]

**Bacterial strains used in this study:**

| <b>Name</b>                                          | <b>Strain</b> | <b>Genotype</b>                |
|------------------------------------------------------|---------------|--------------------------------|
| <i>Salmonella enterica</i> serovar Typhimurium (STM) | SL1344        |                                |
| STM T3SS-1 <sup>mut</sup>                            | SL1344        | <i>orgA::Tn5lacZY</i>          |
| STM T3SS-2 <sup>mut</sup>                            | SL1344        | <i>ssaV::mudJ</i>              |
| STM-DsRed                                            | SL1344        | pGEN plasmid expressing Ds-Red |

**Table S5:** List of bacterial strains used in this study, previously described in (44, 45).
